# Supplementary material
Source: MDPI journal article supplement (https://www.mdpi.com/1996-1073/12/20/3870)

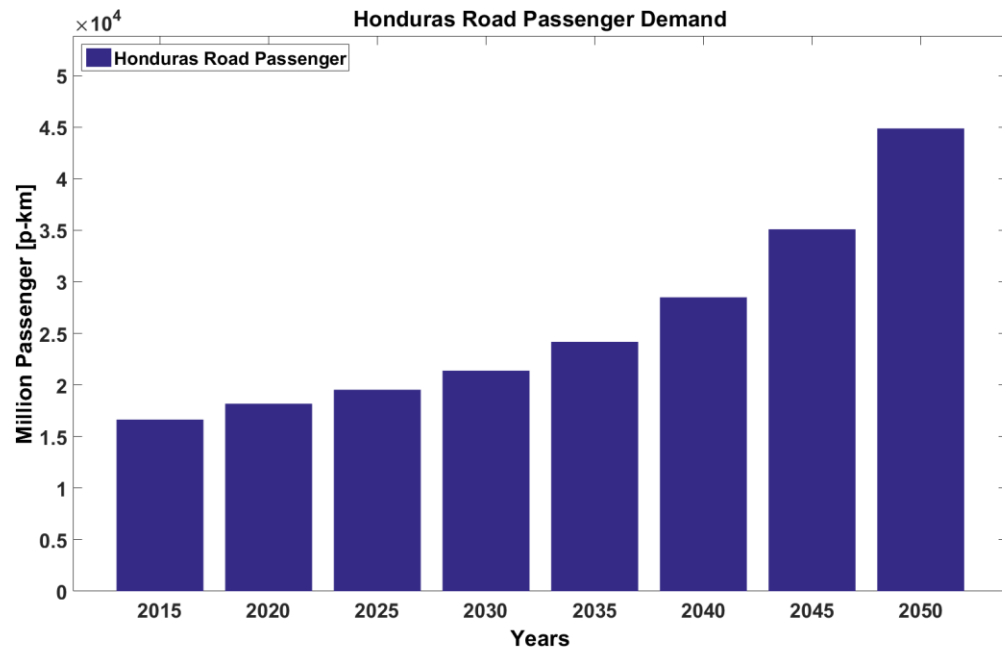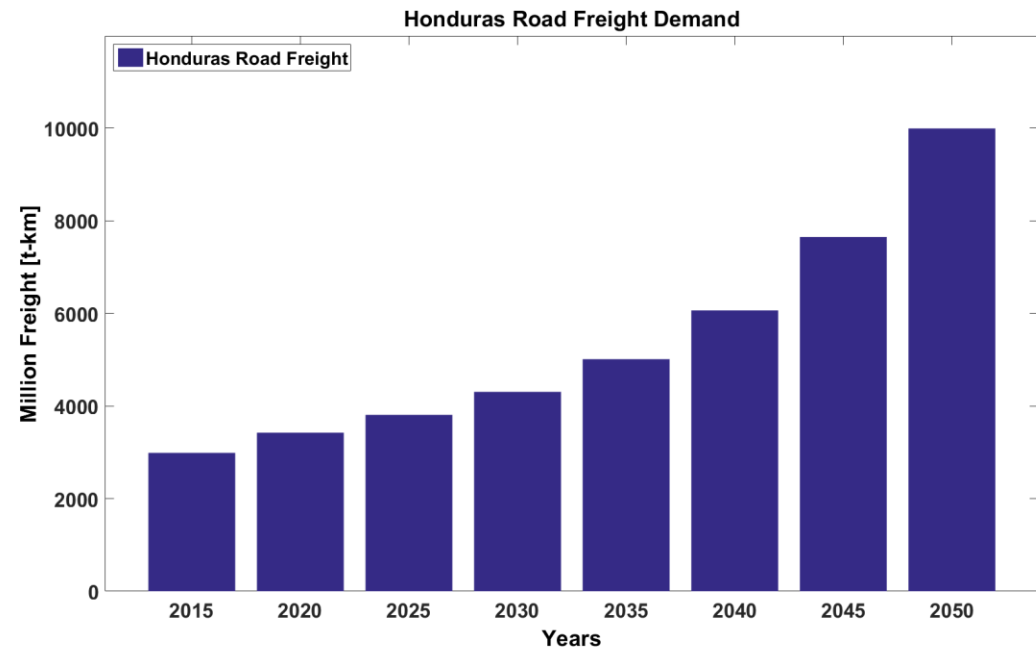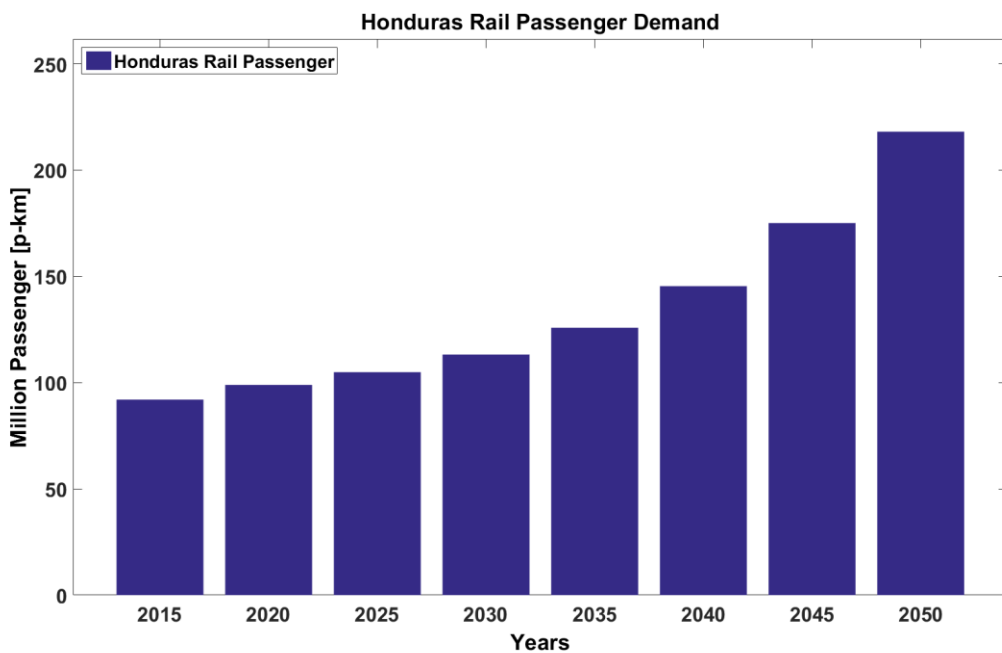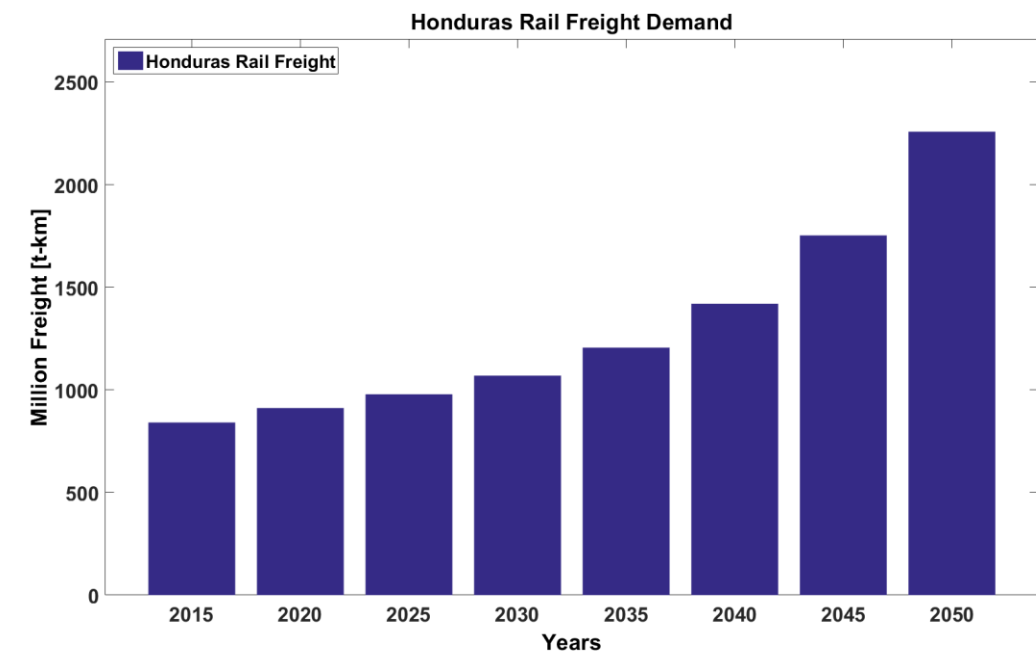

### Honduras Marine Passenger Demand

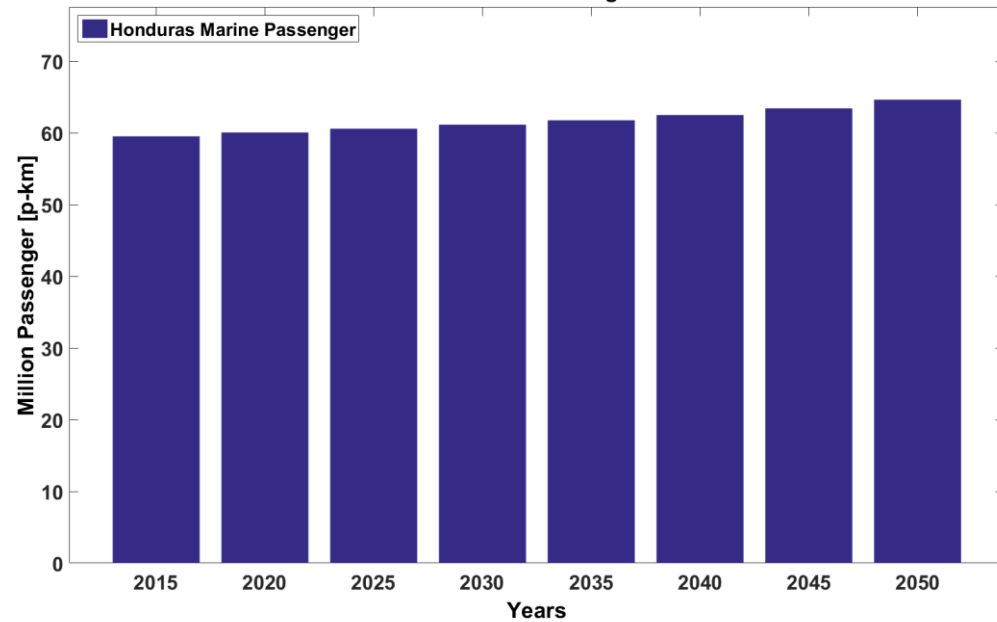

### Honduras Marine Freight Demand

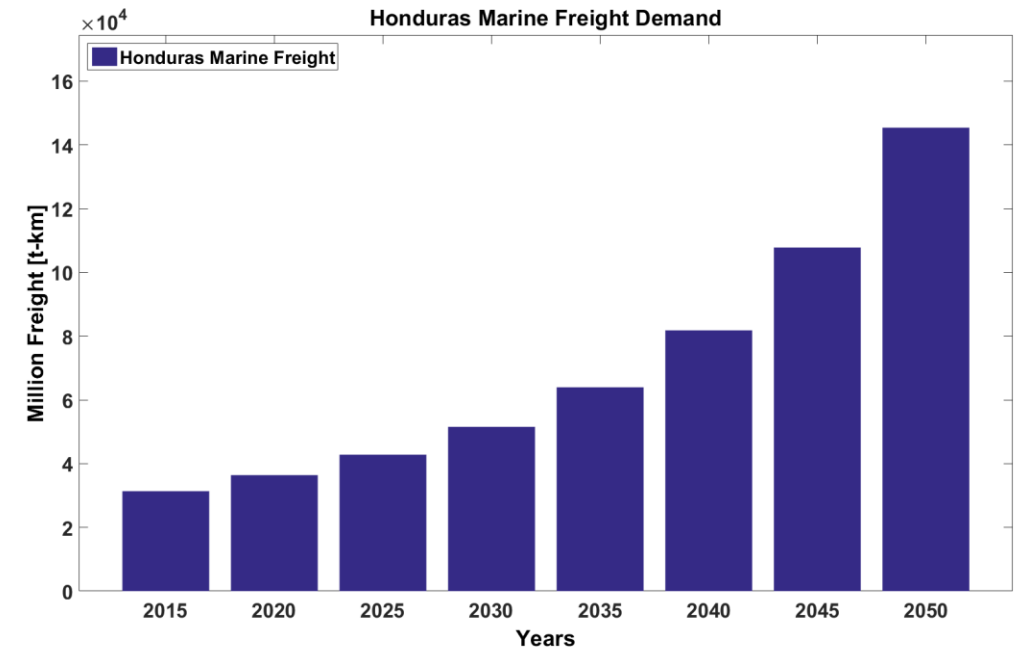

### Honduras Aviation Passenger Demand

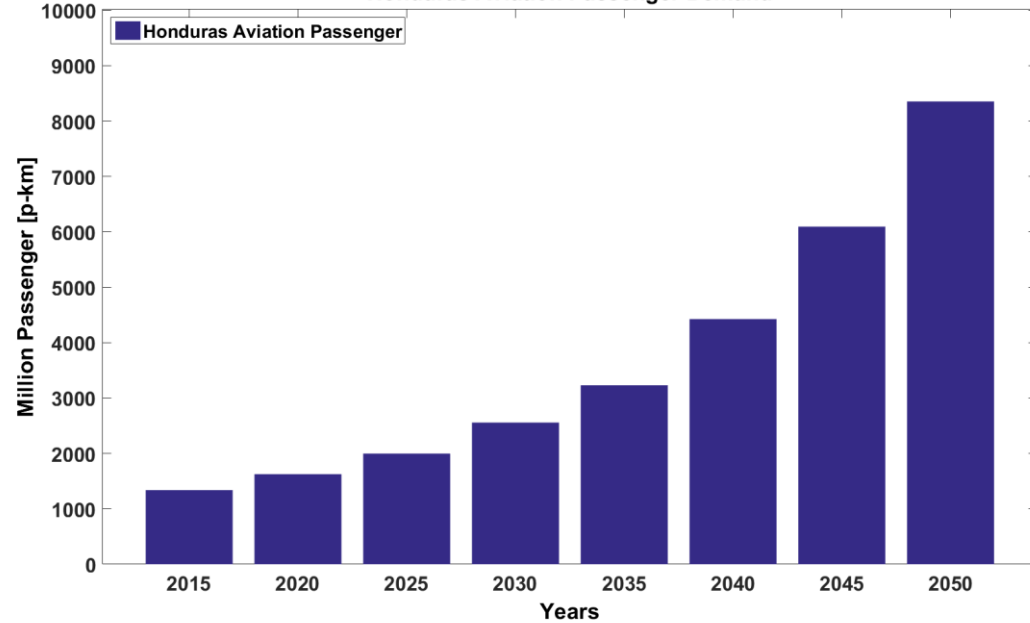

### Honduras Aviation Freight Demand

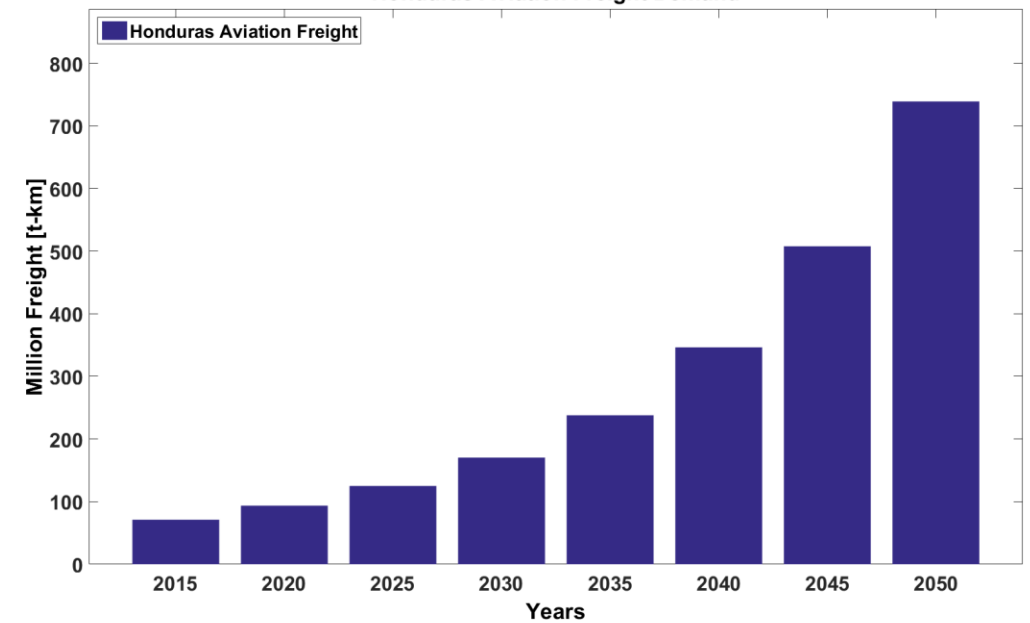

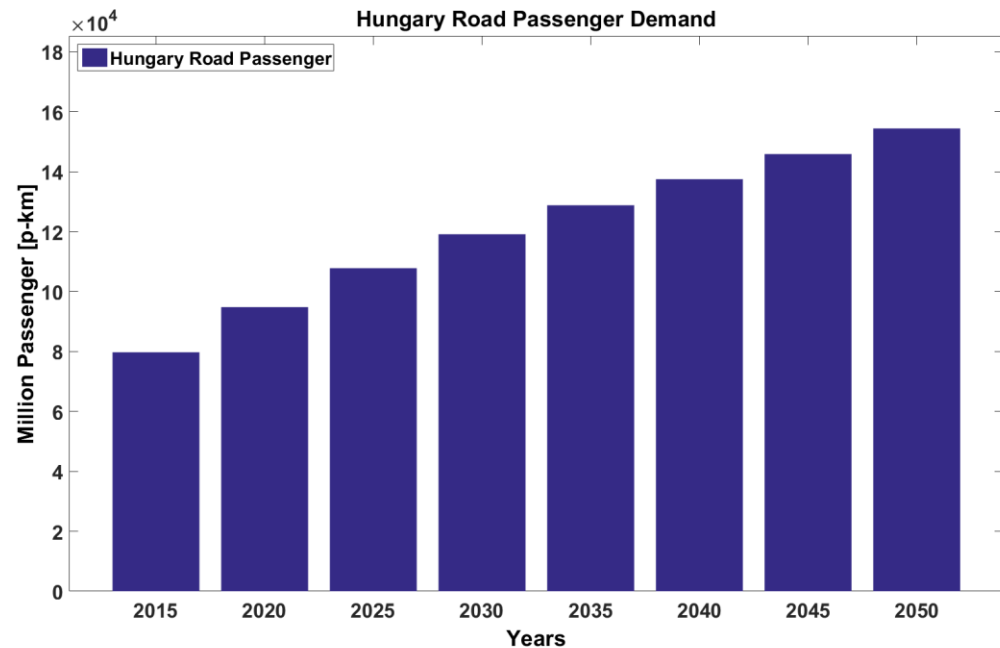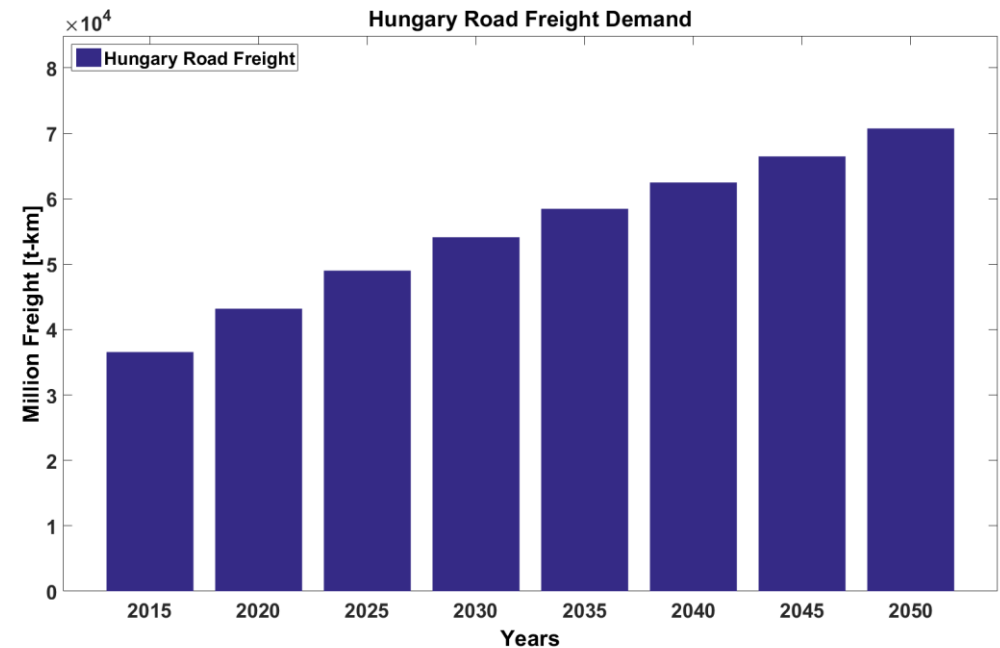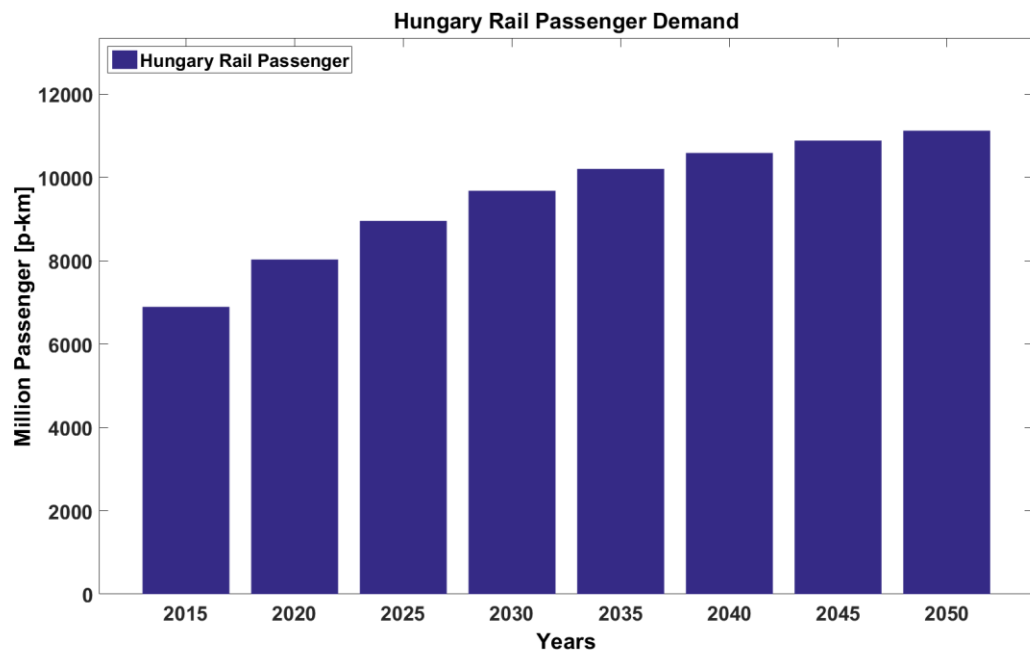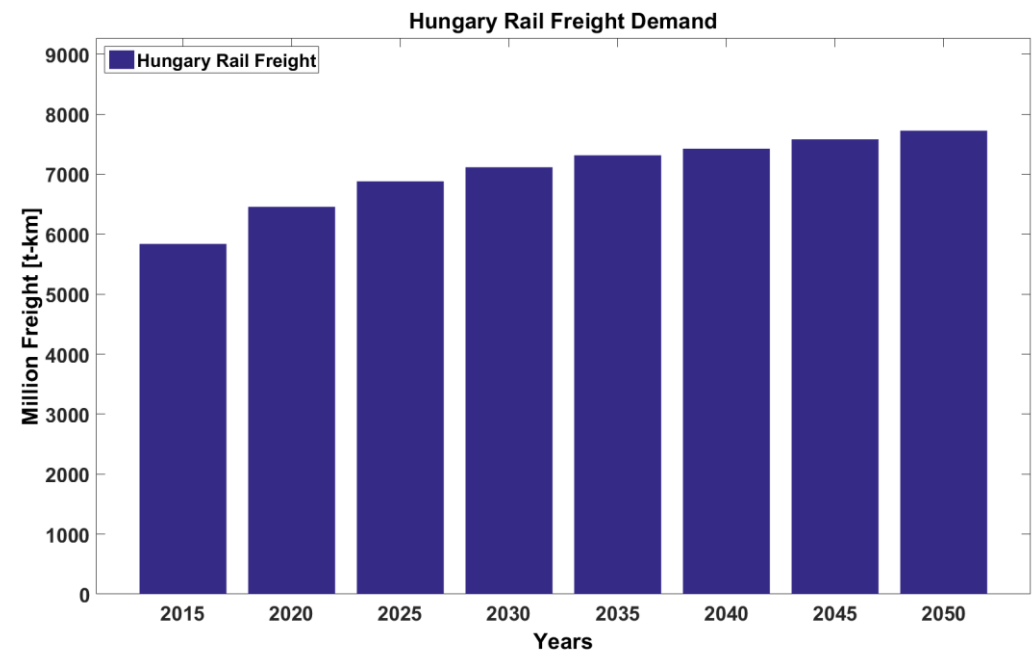

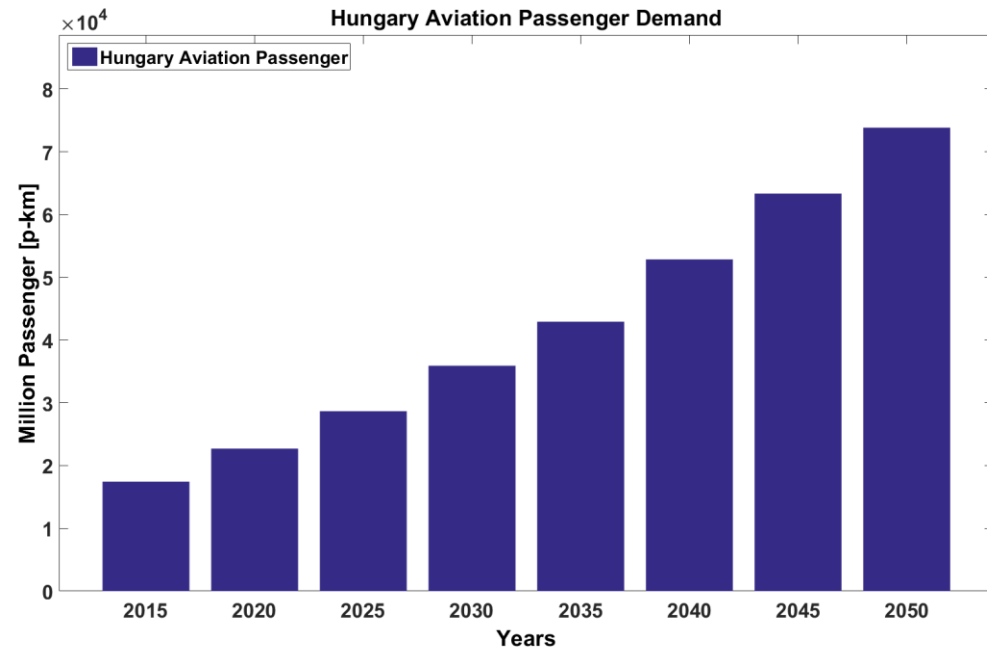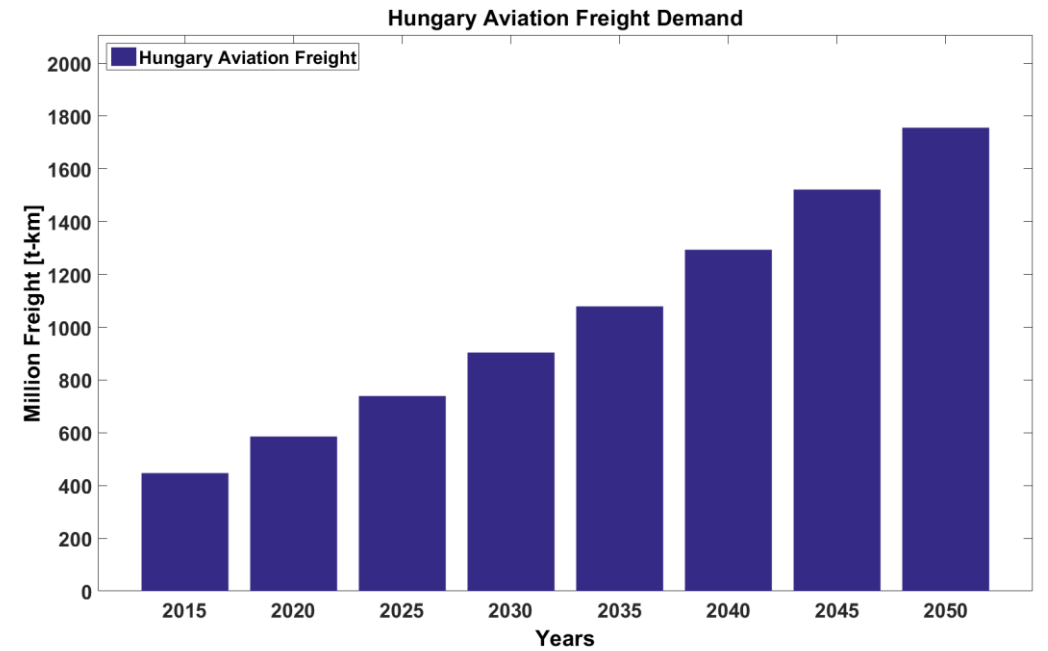

Iceland Road Passenger Demand

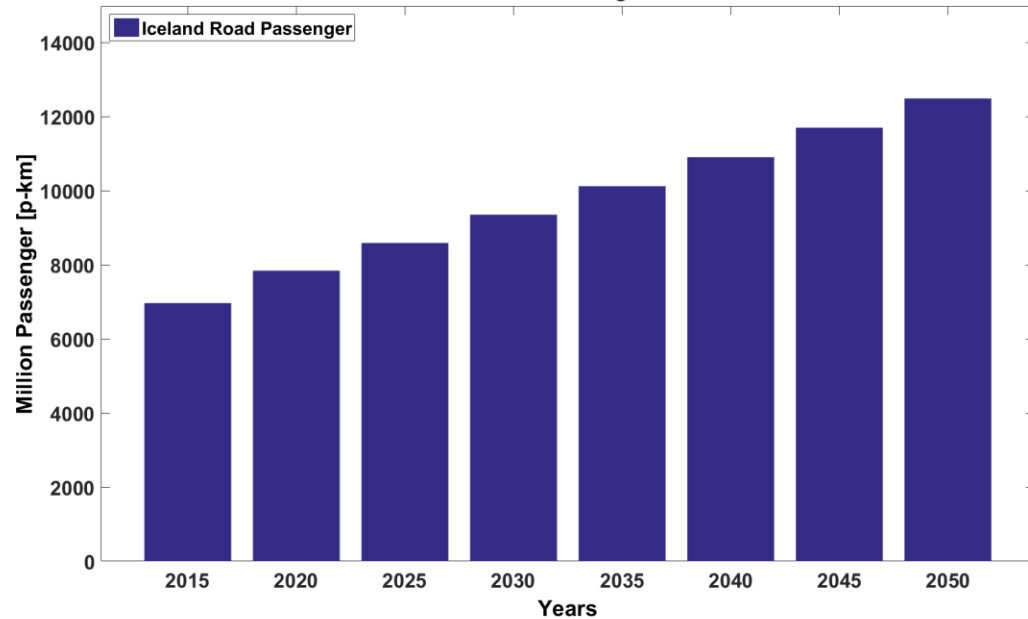

Iceland Road Freight Demand

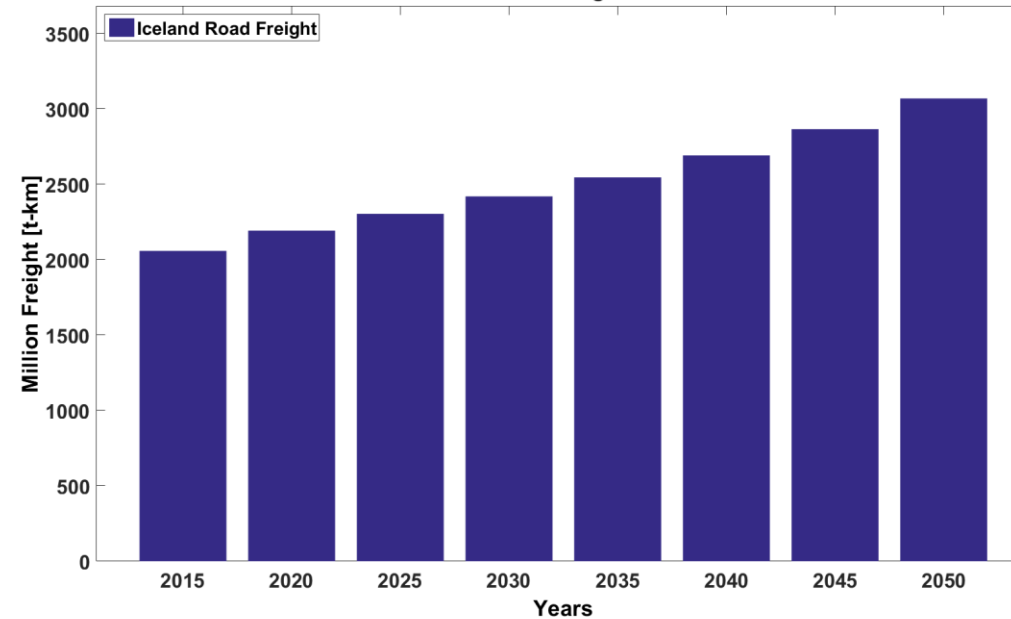

Iceland Rail Passenger Demand

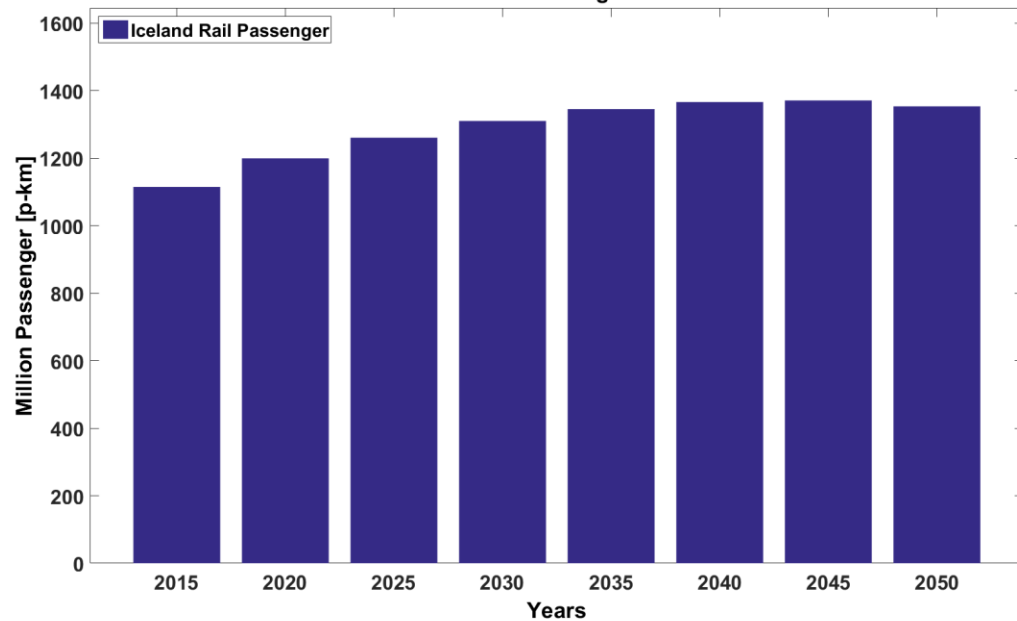

Iceland Rail Freight Demand

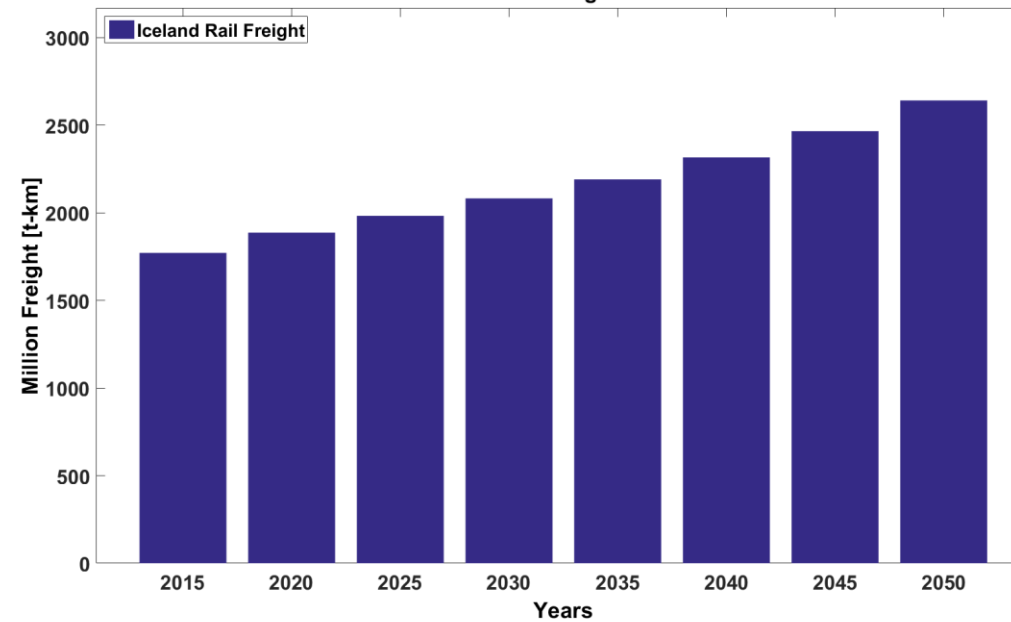

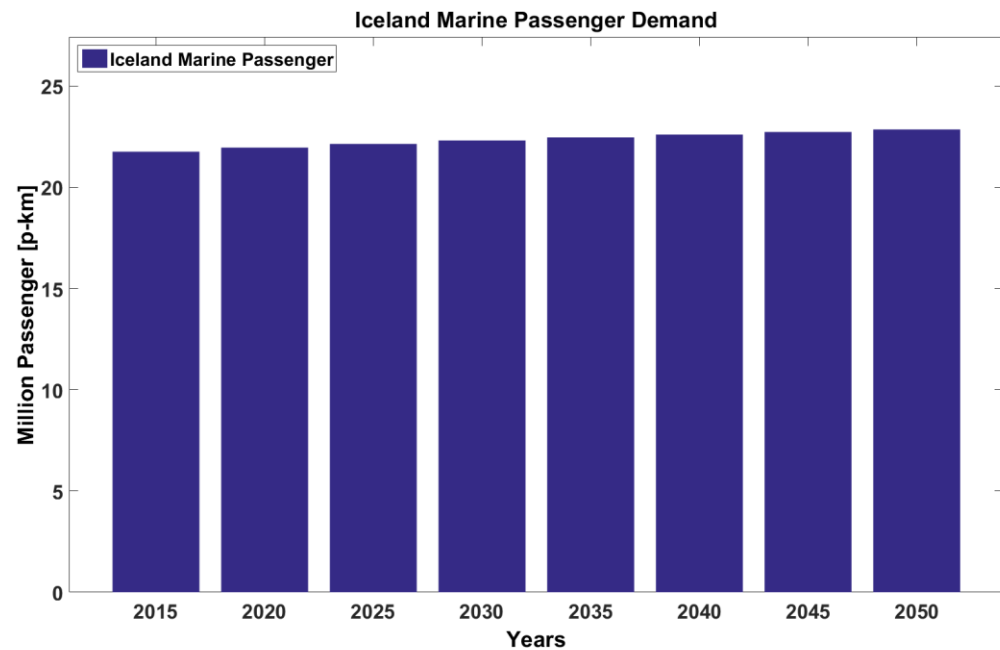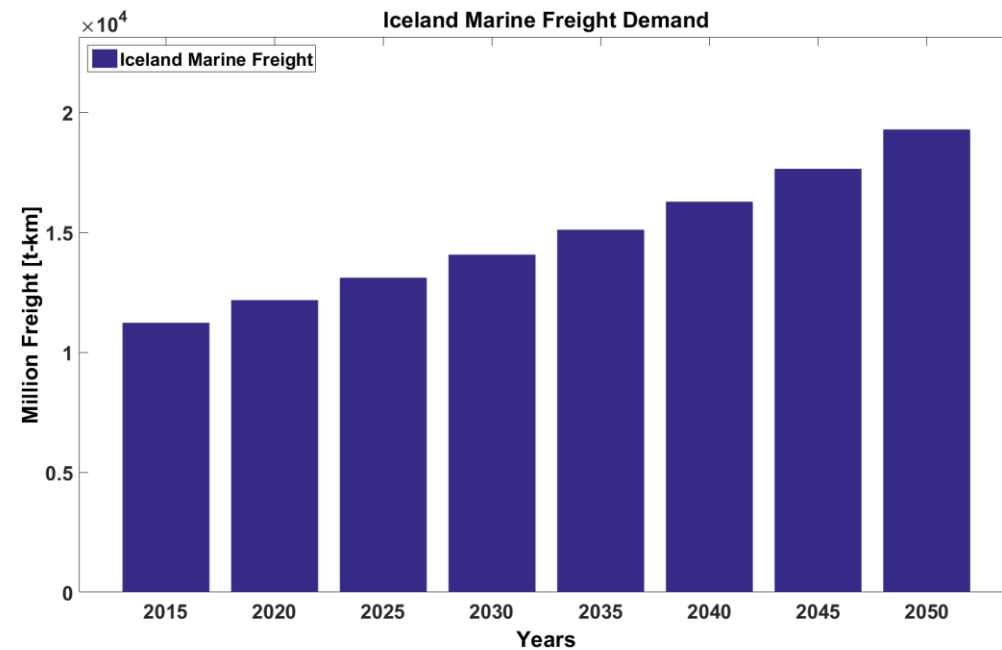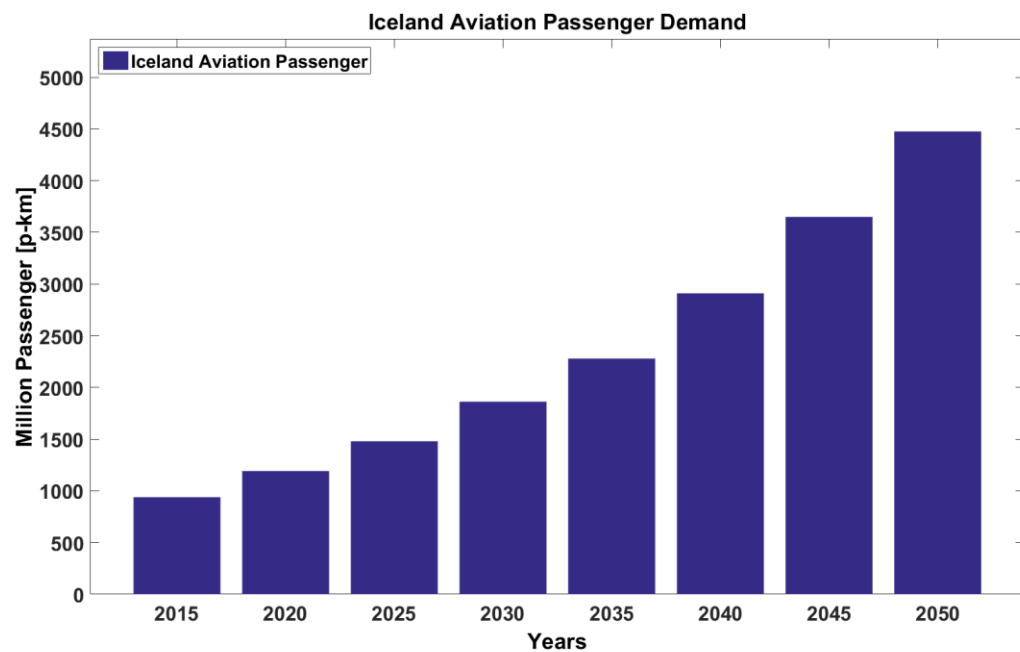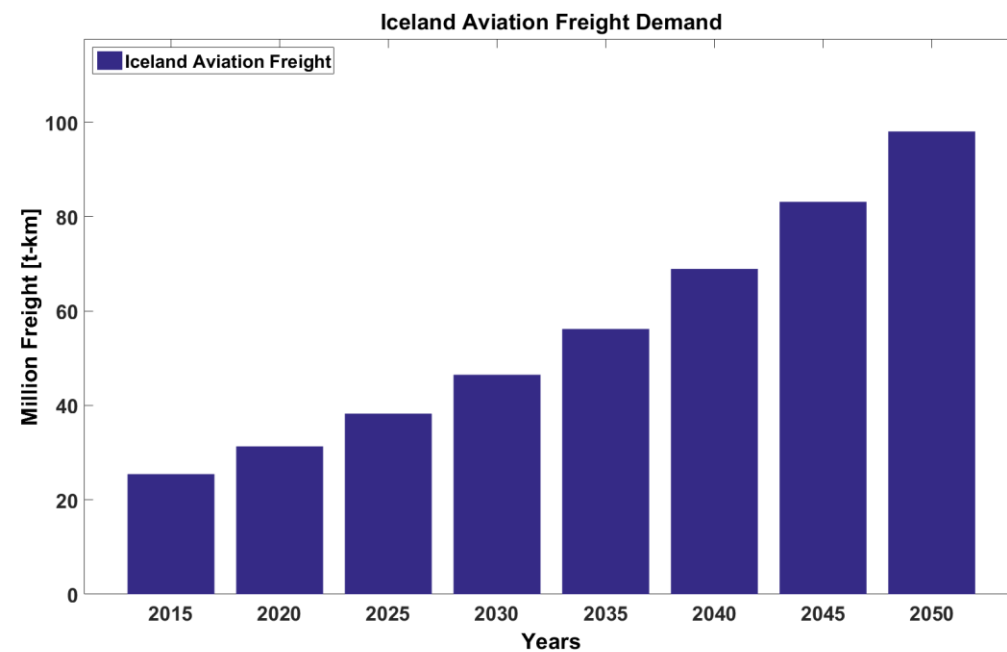

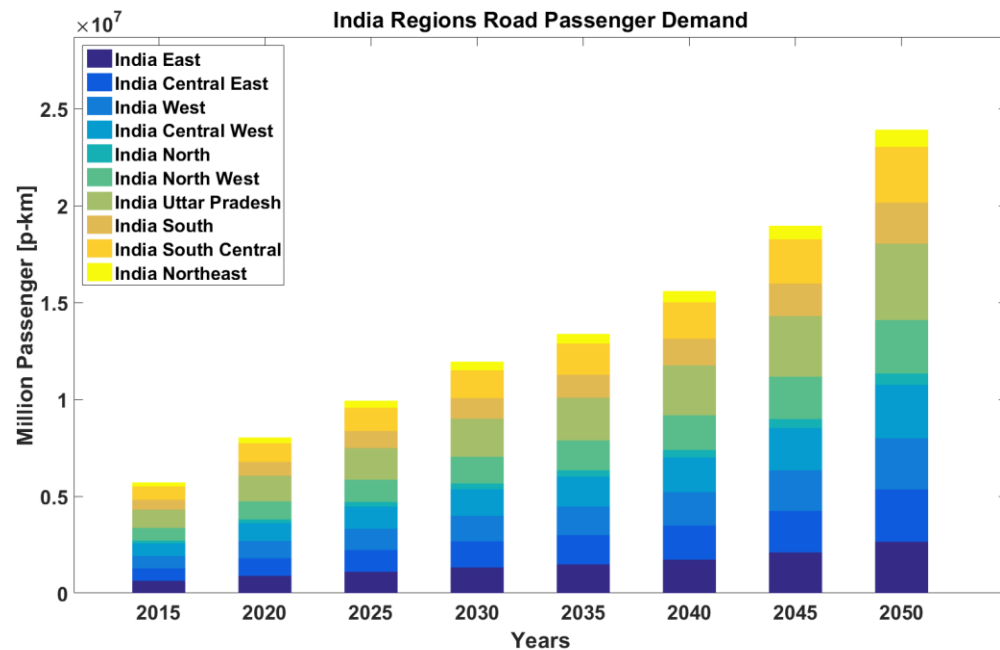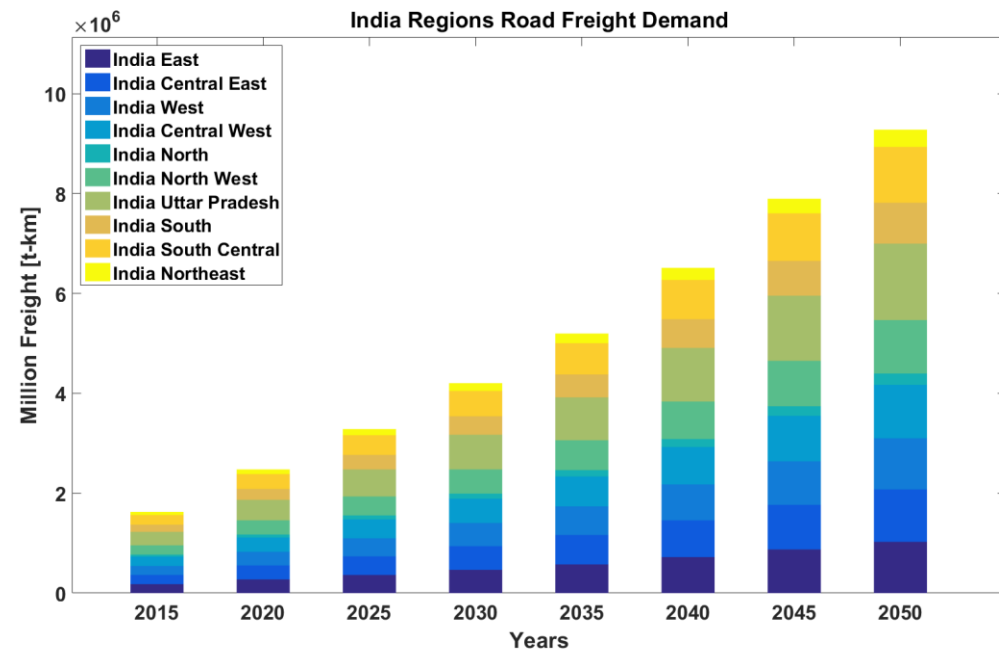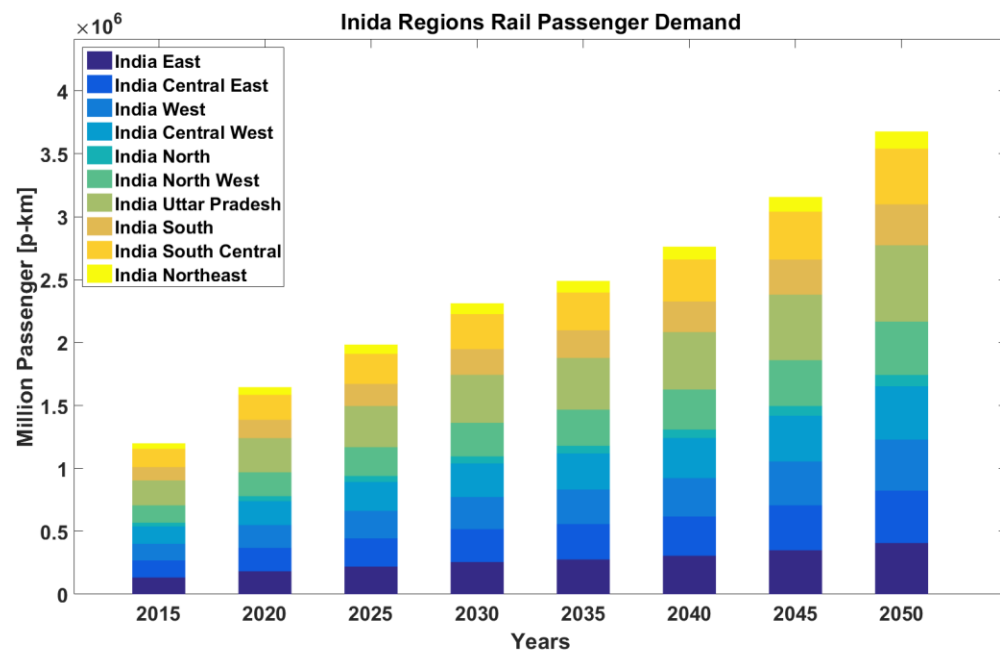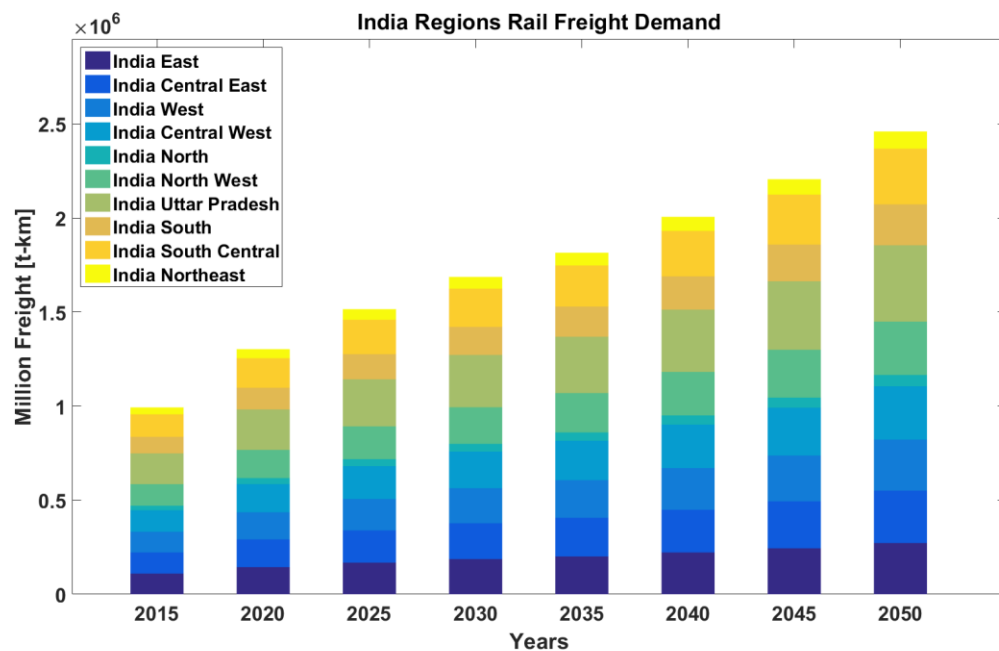



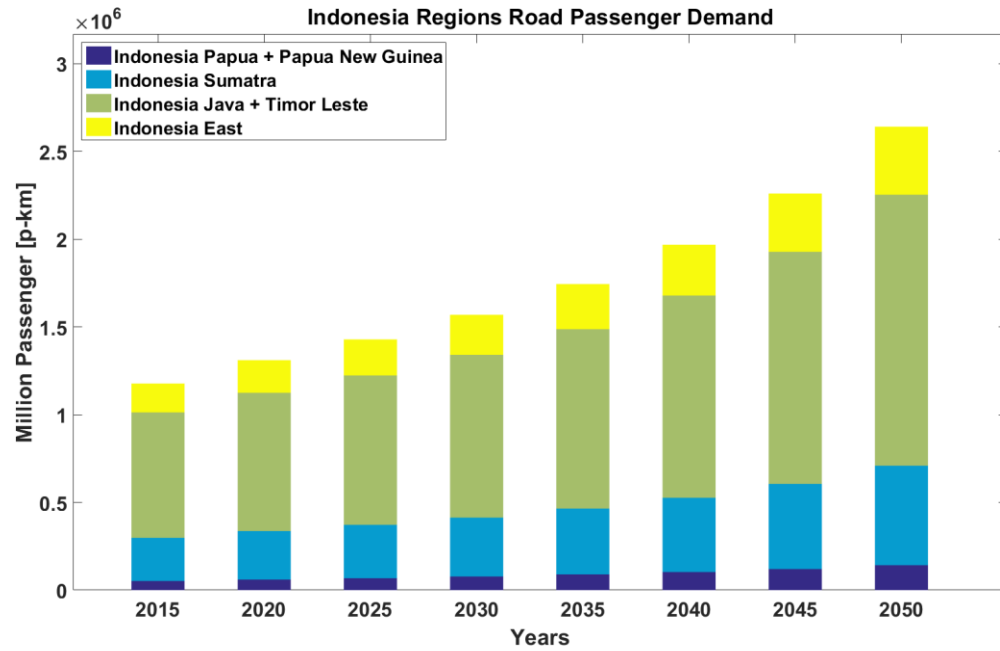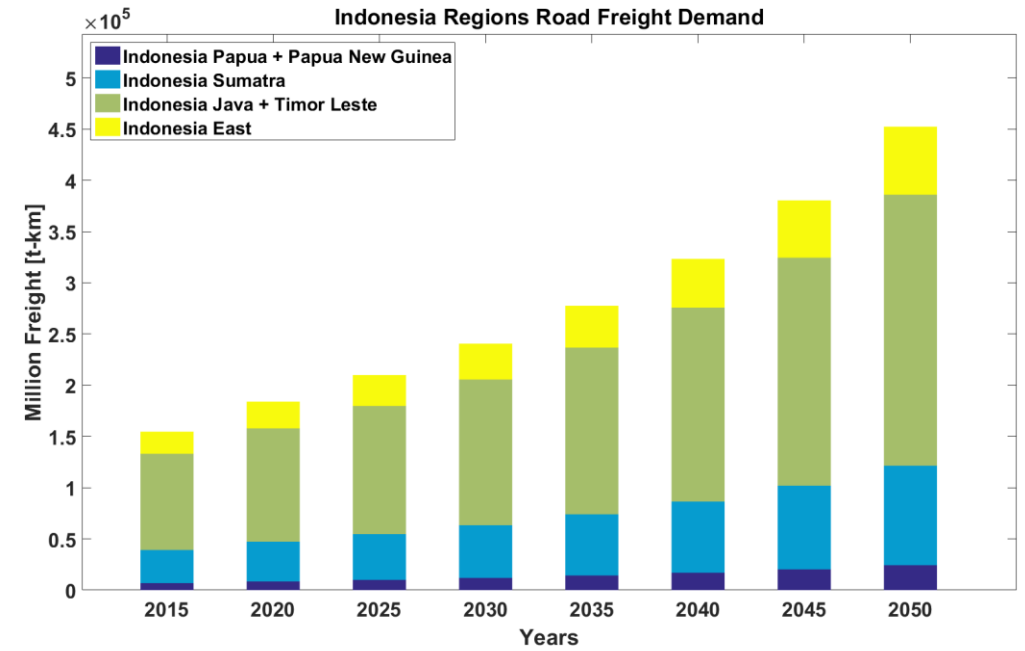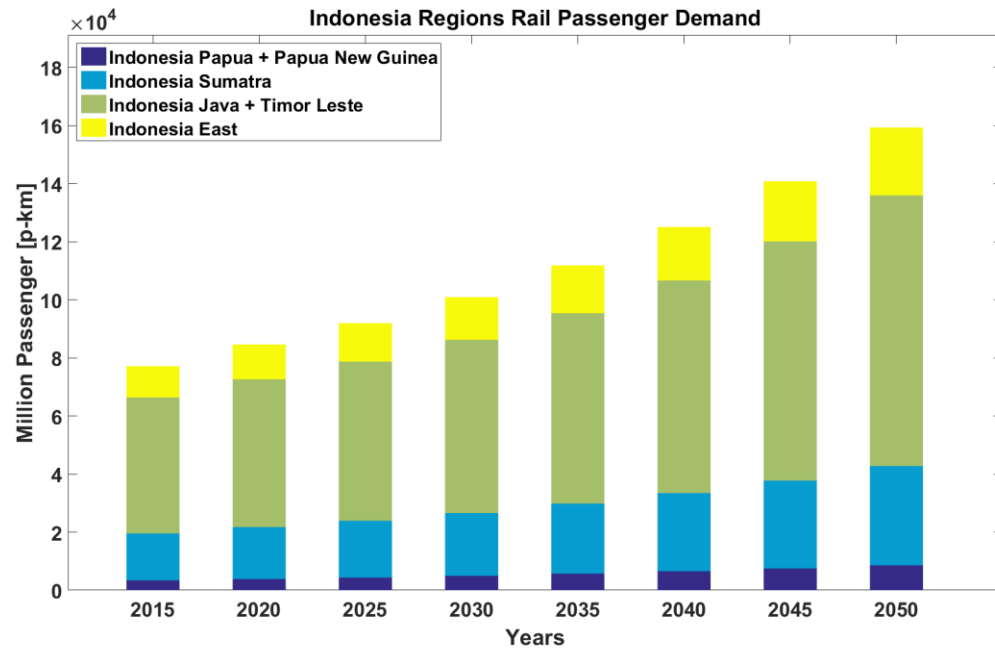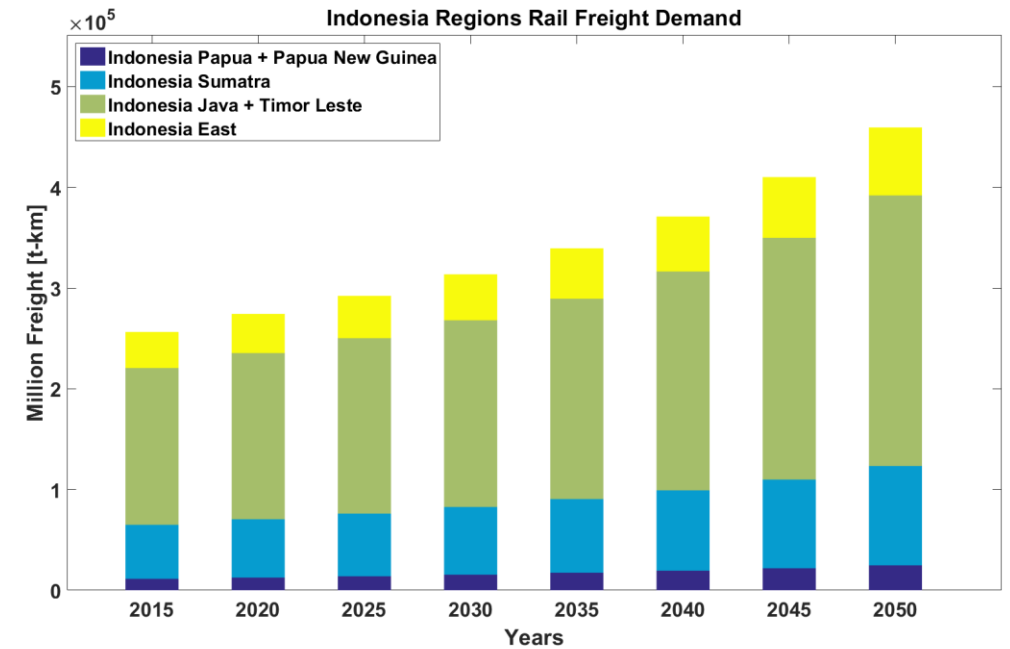

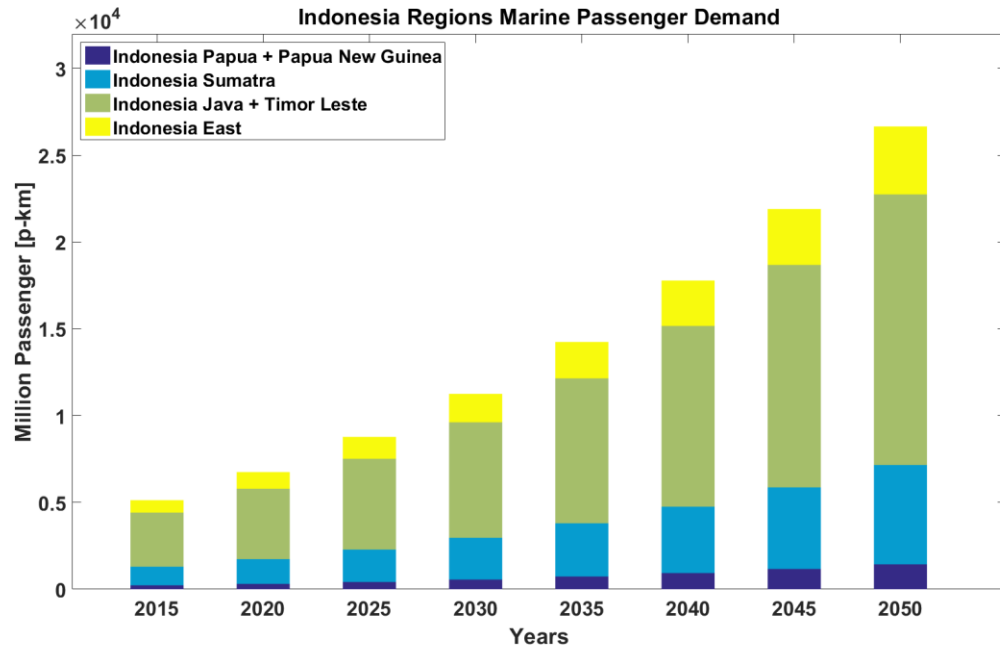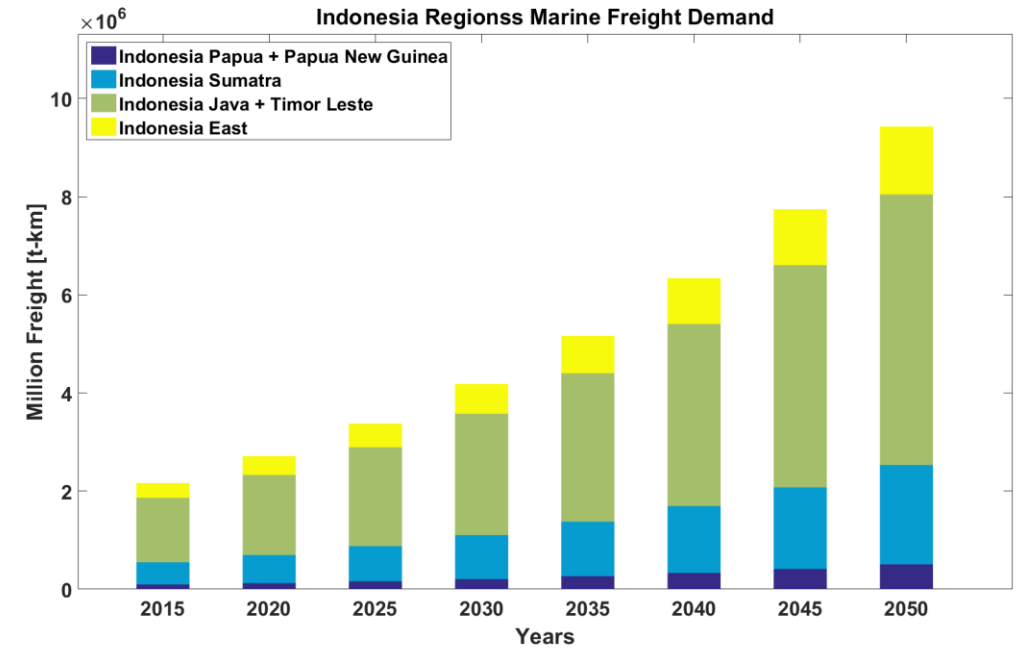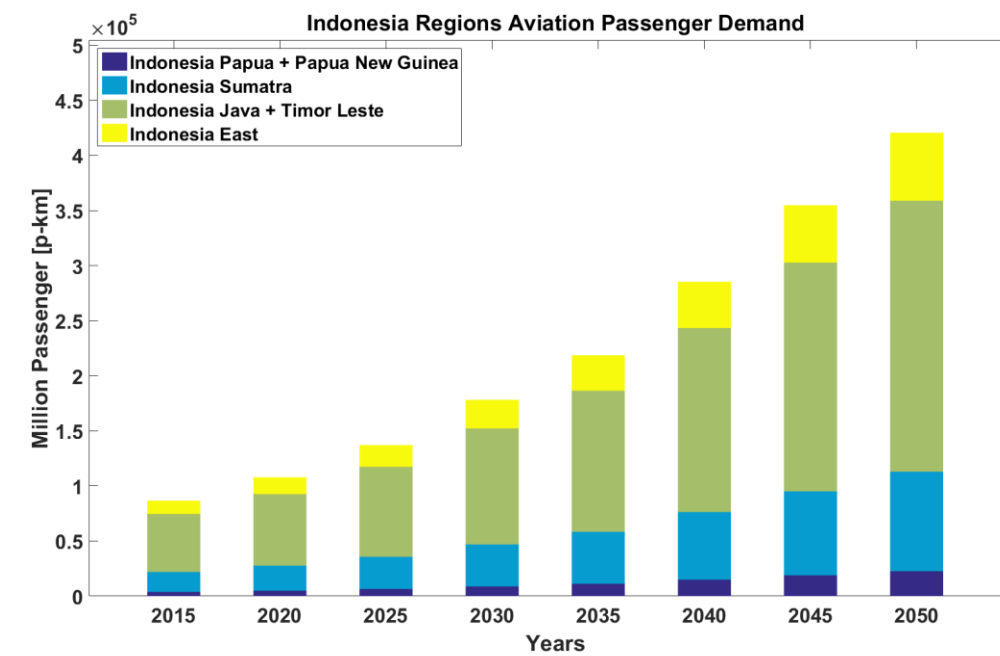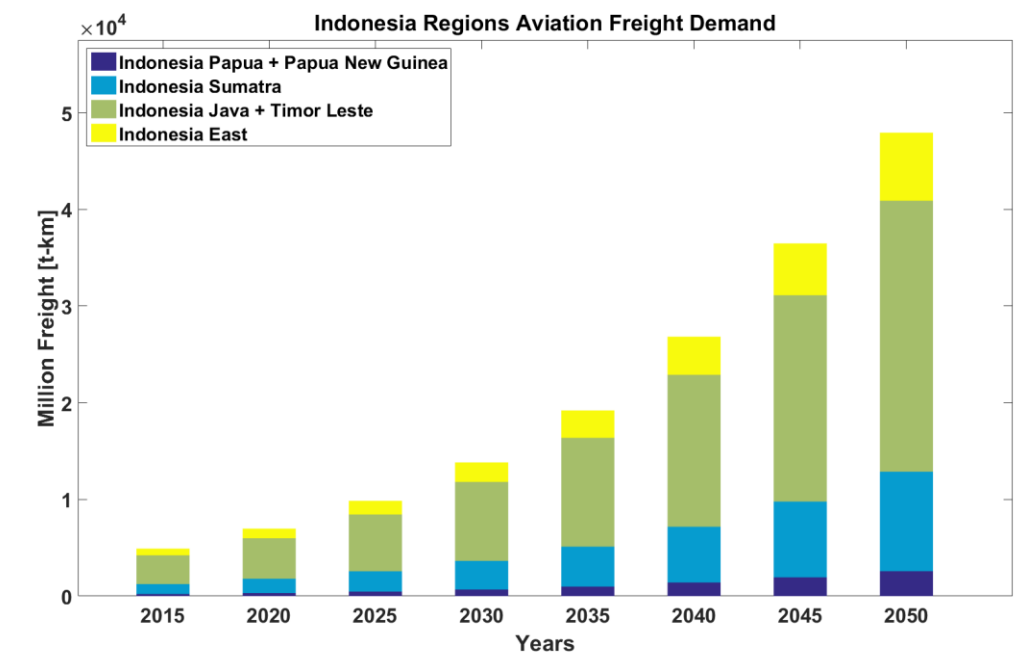

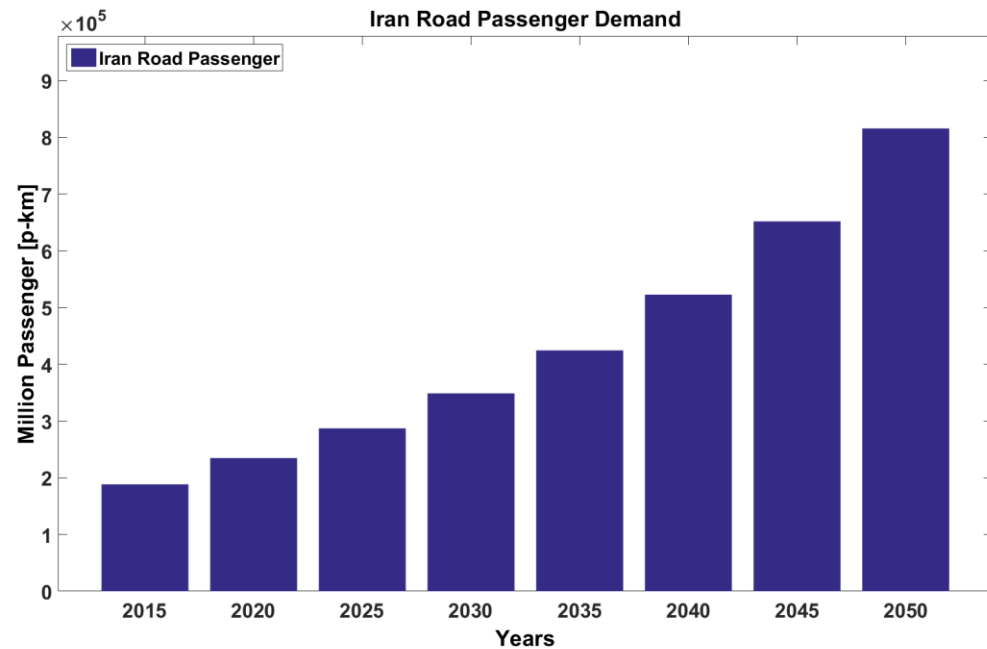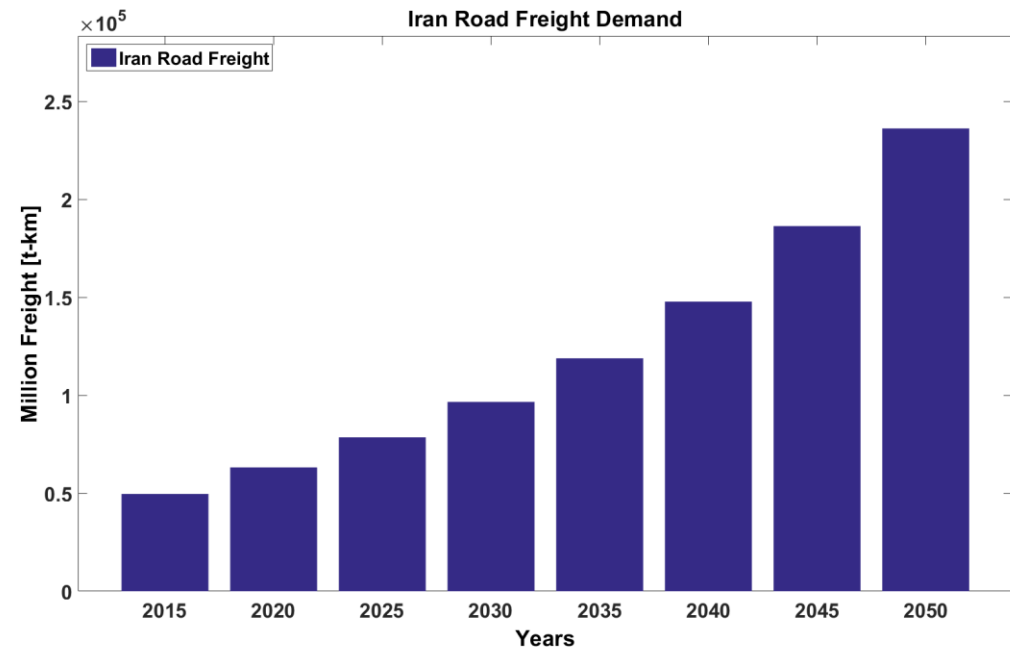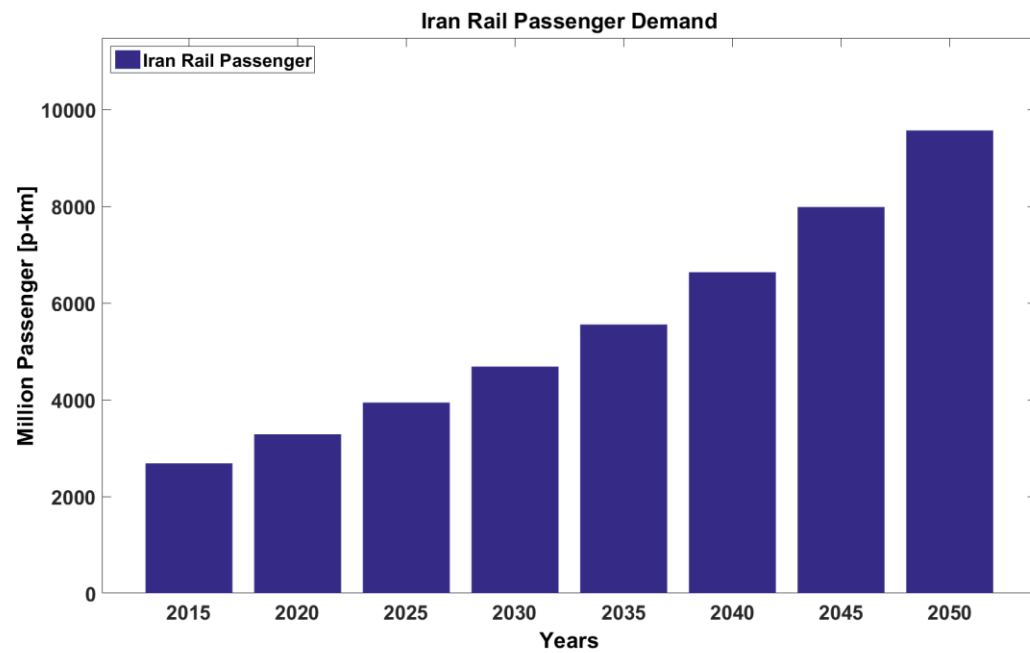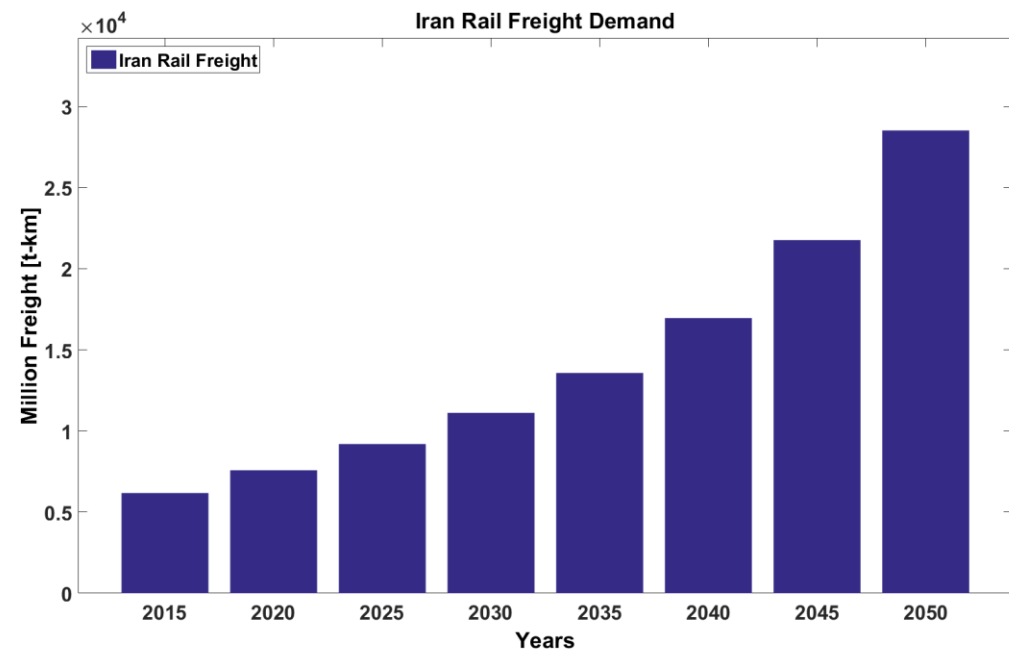

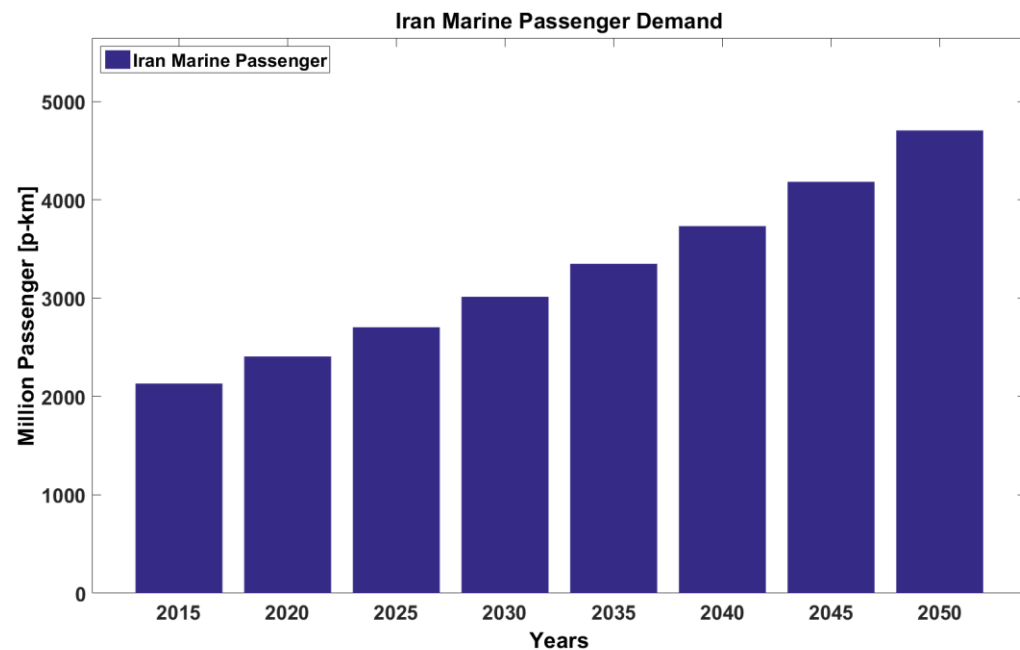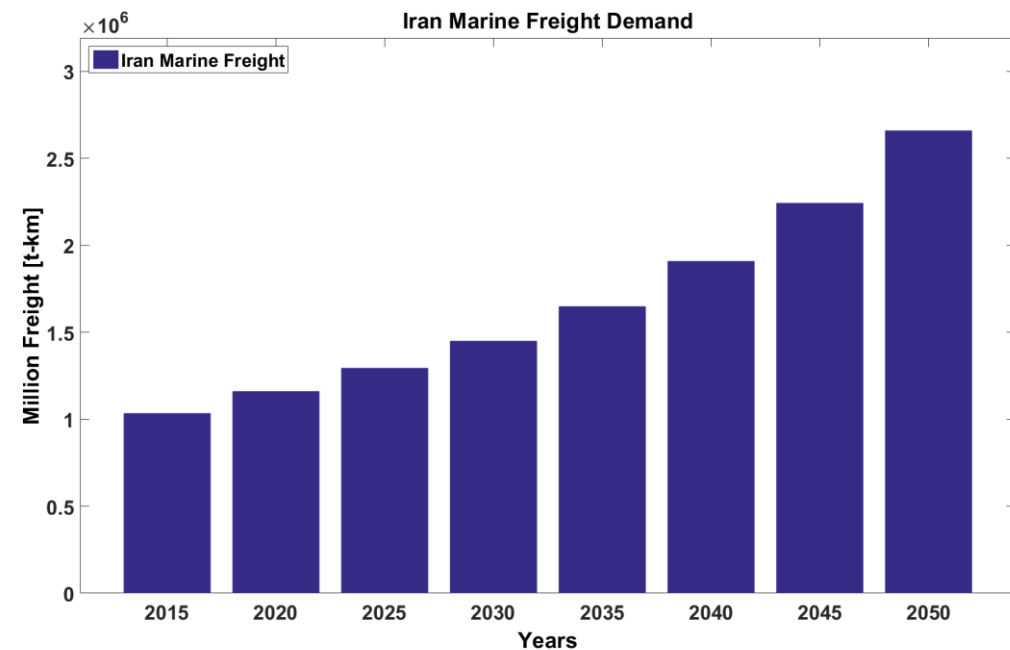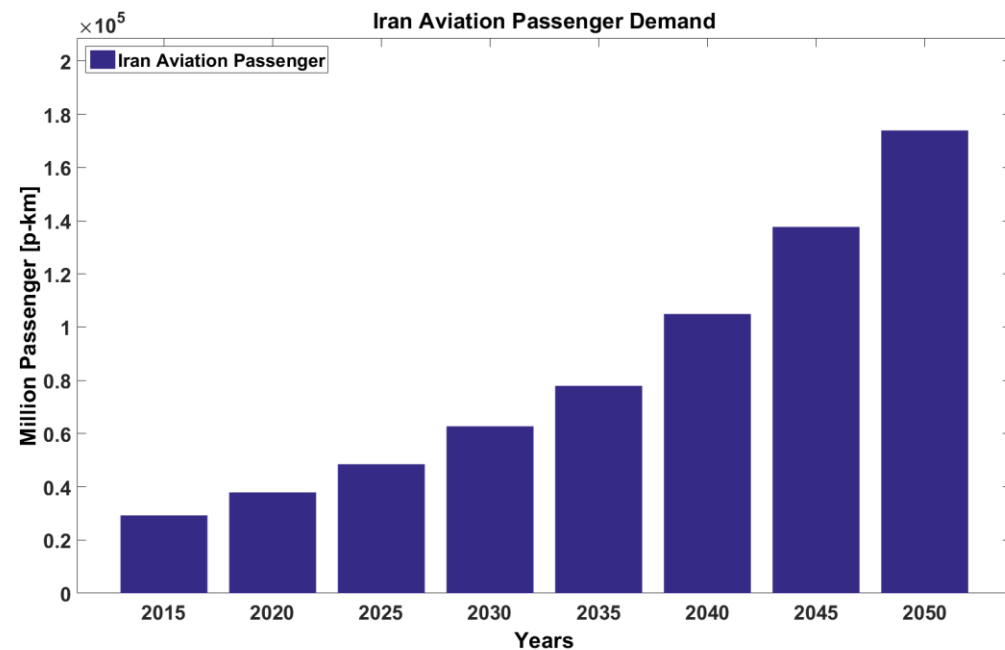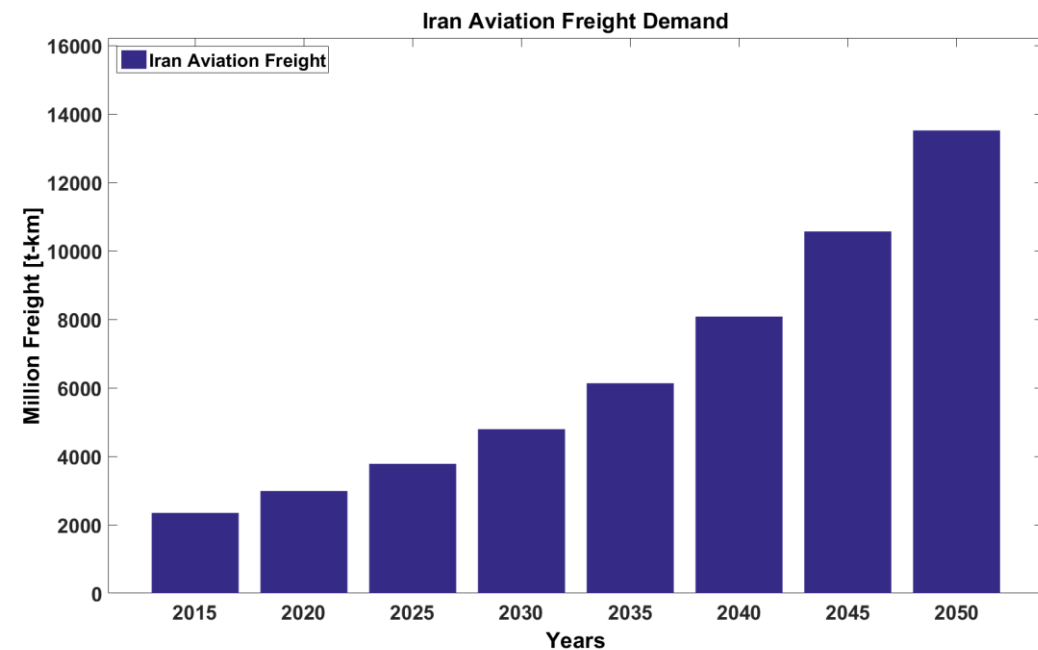

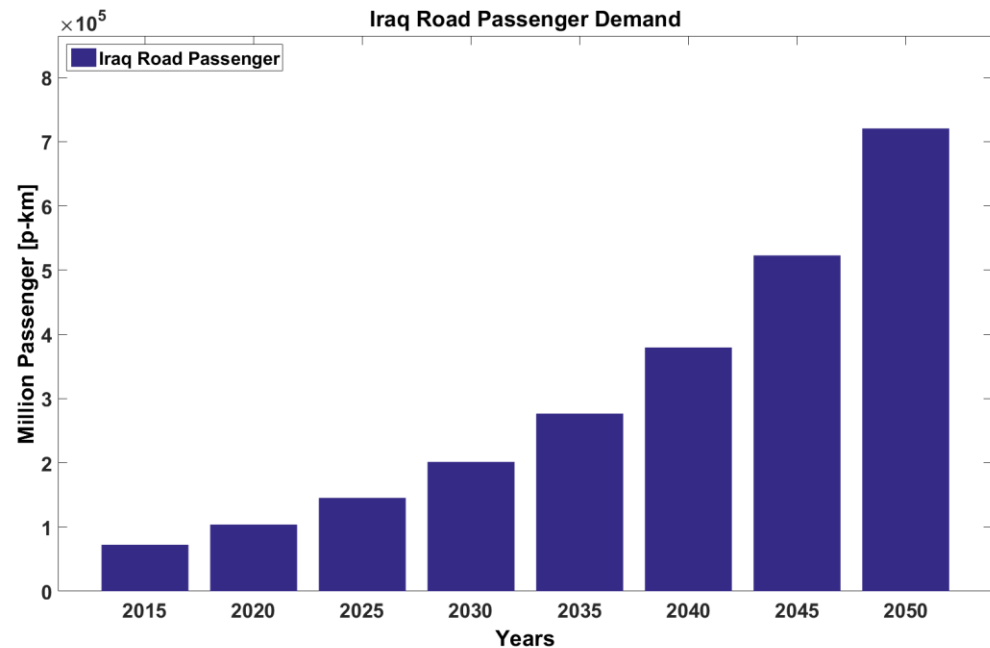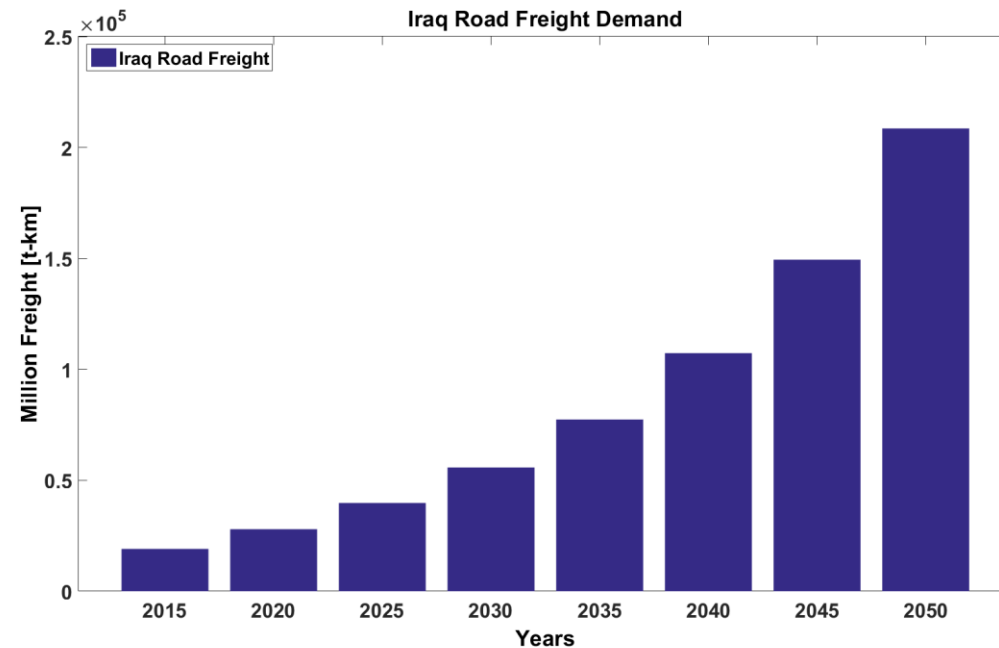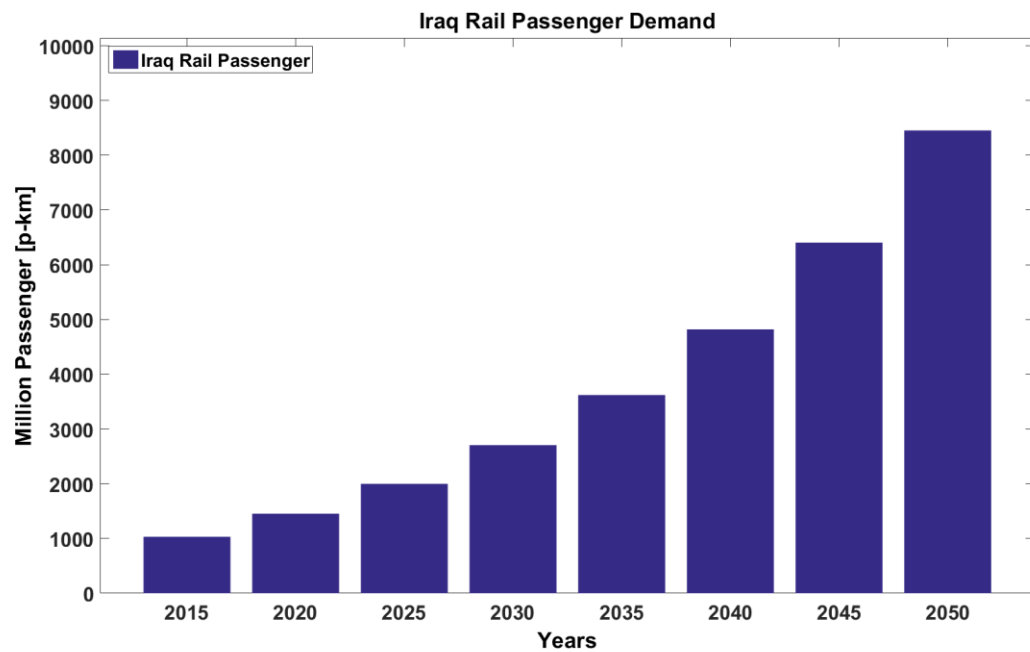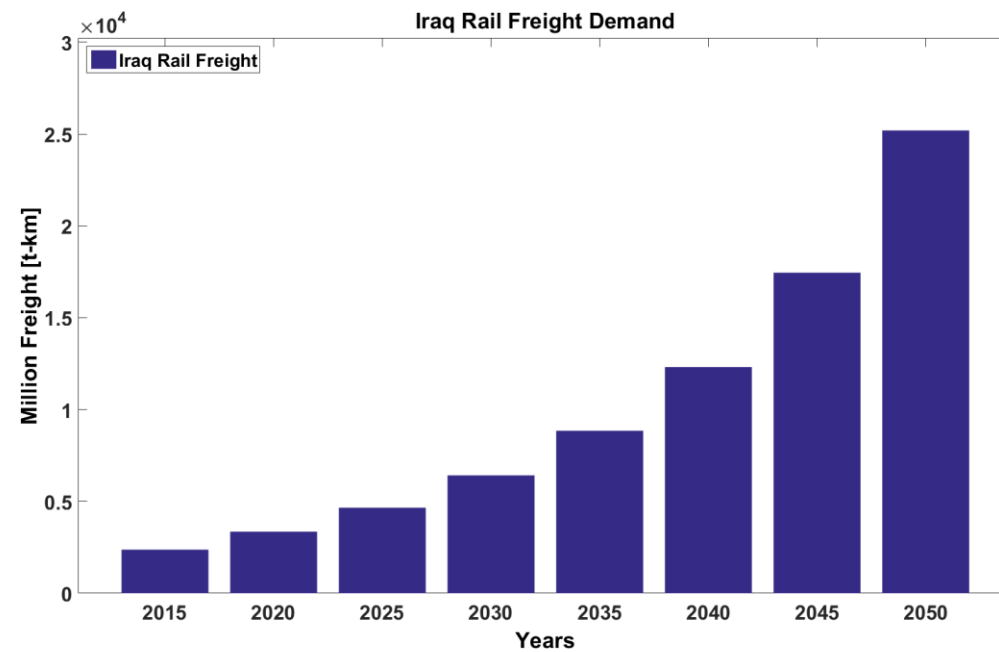

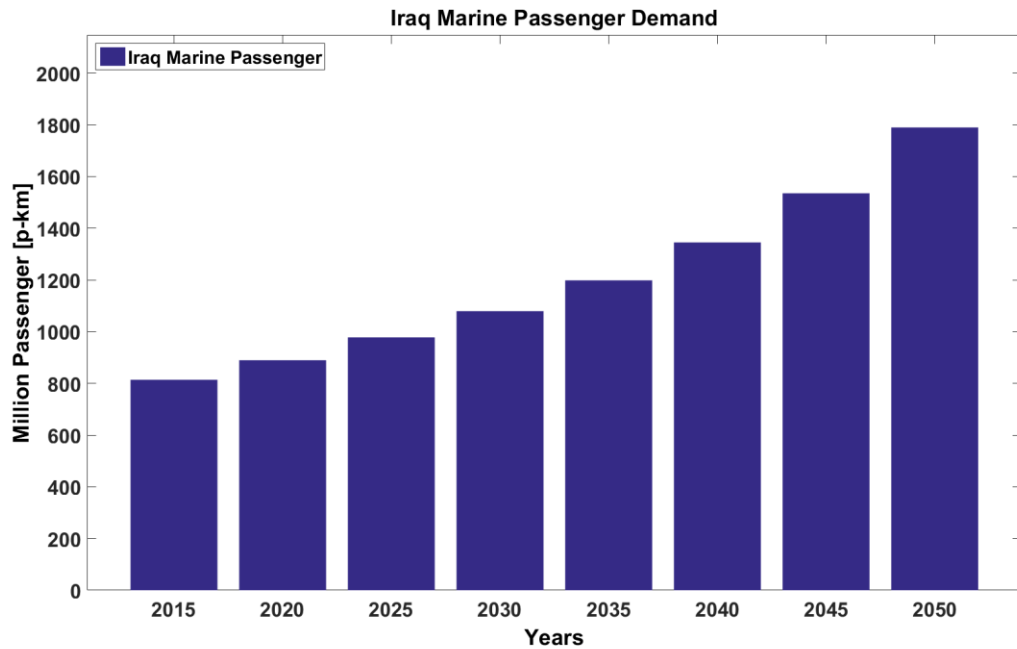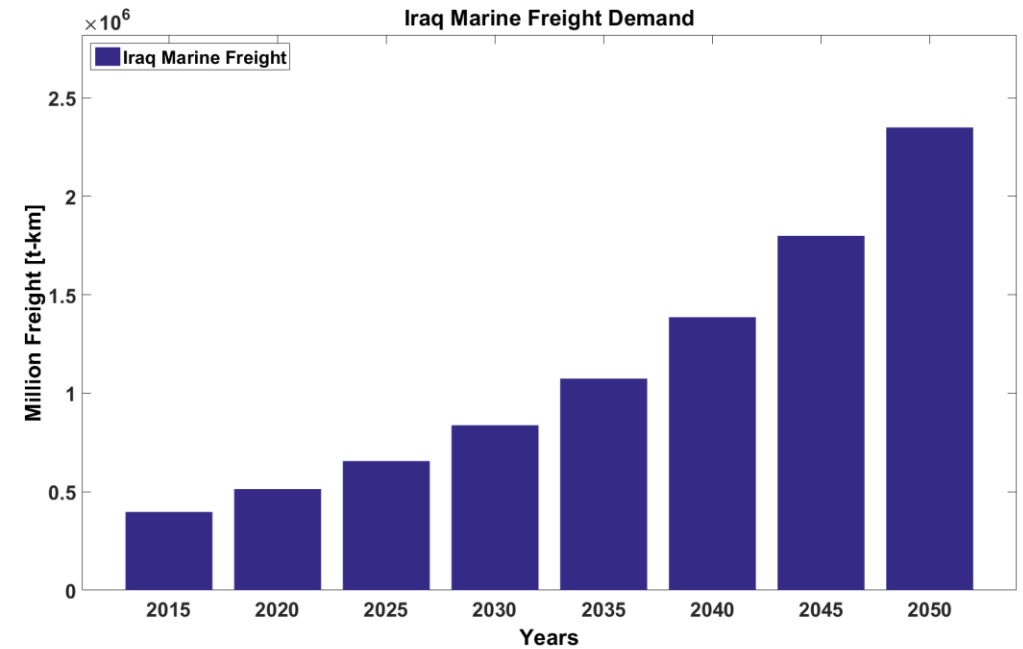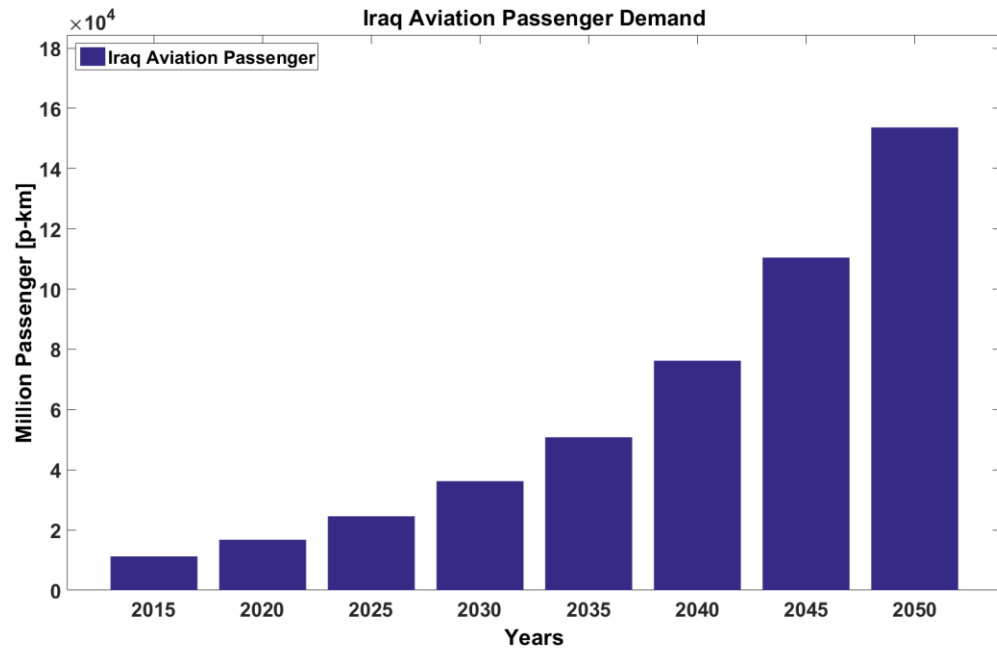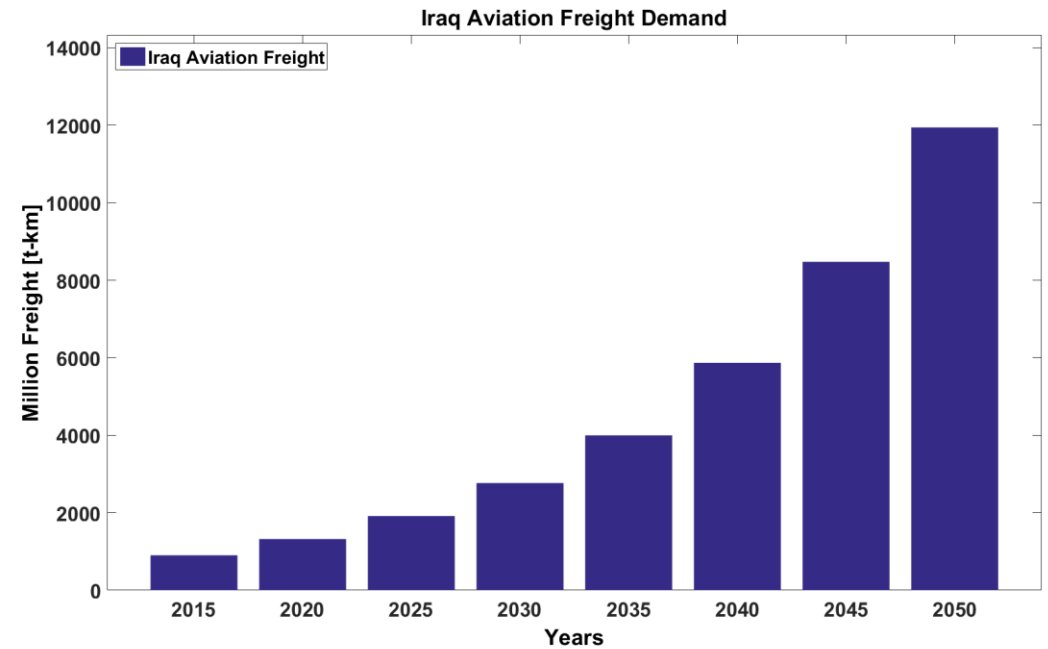

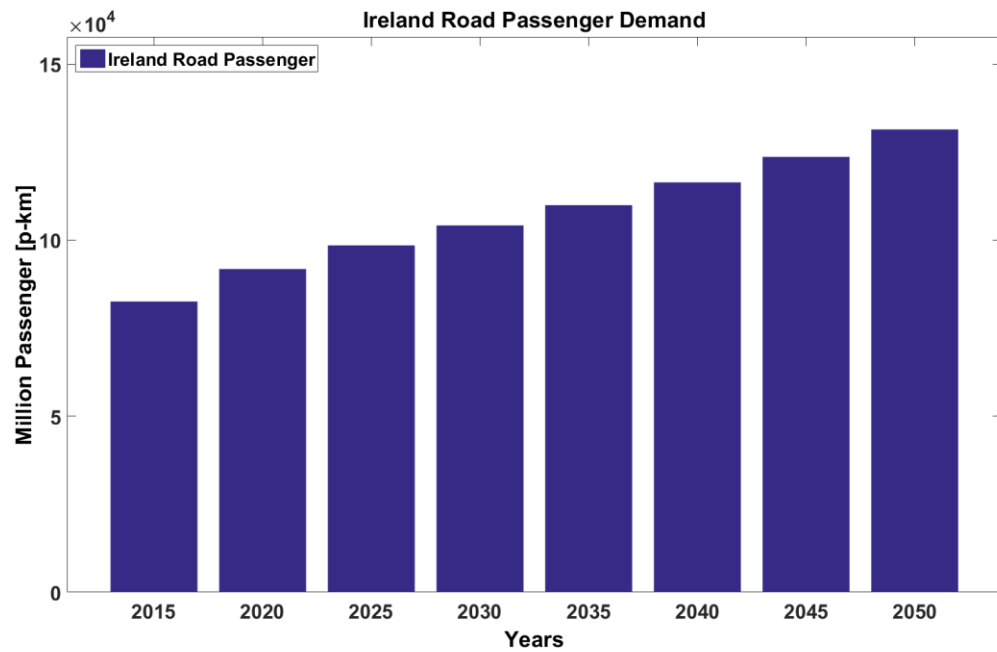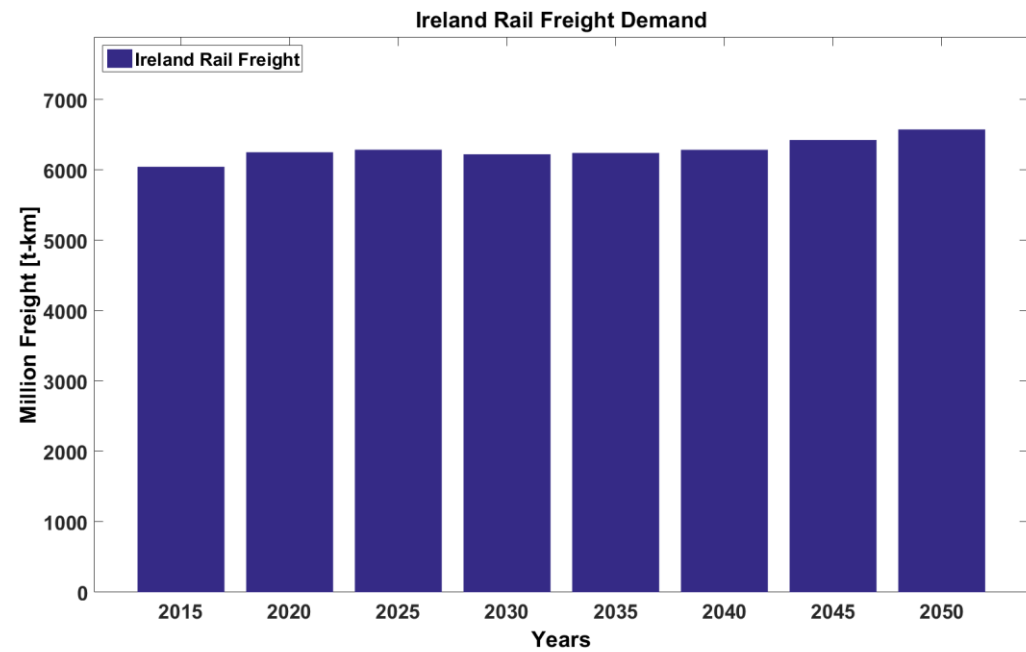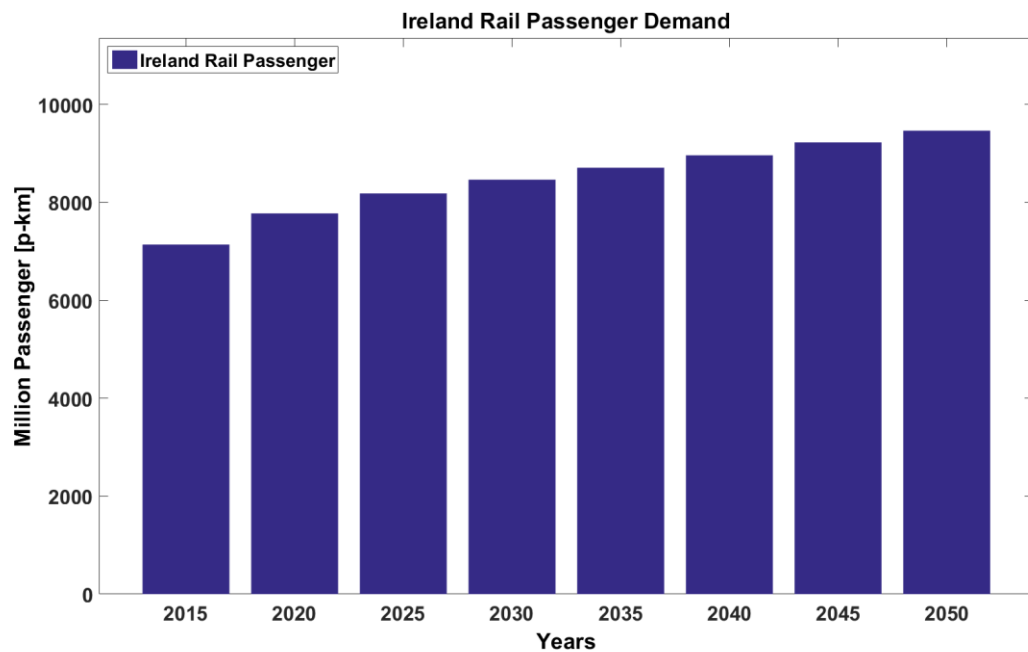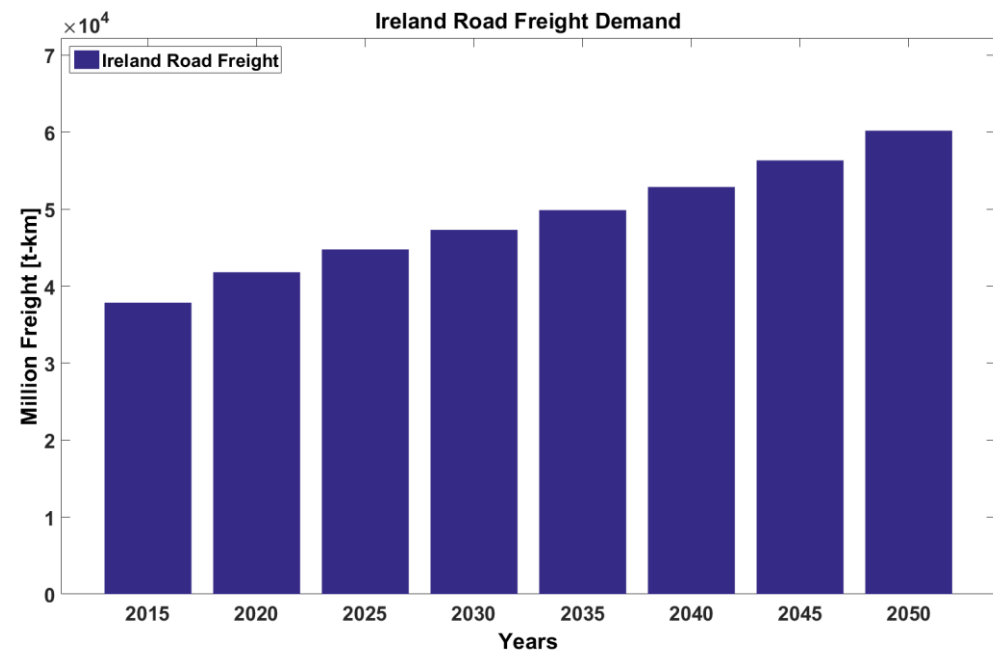

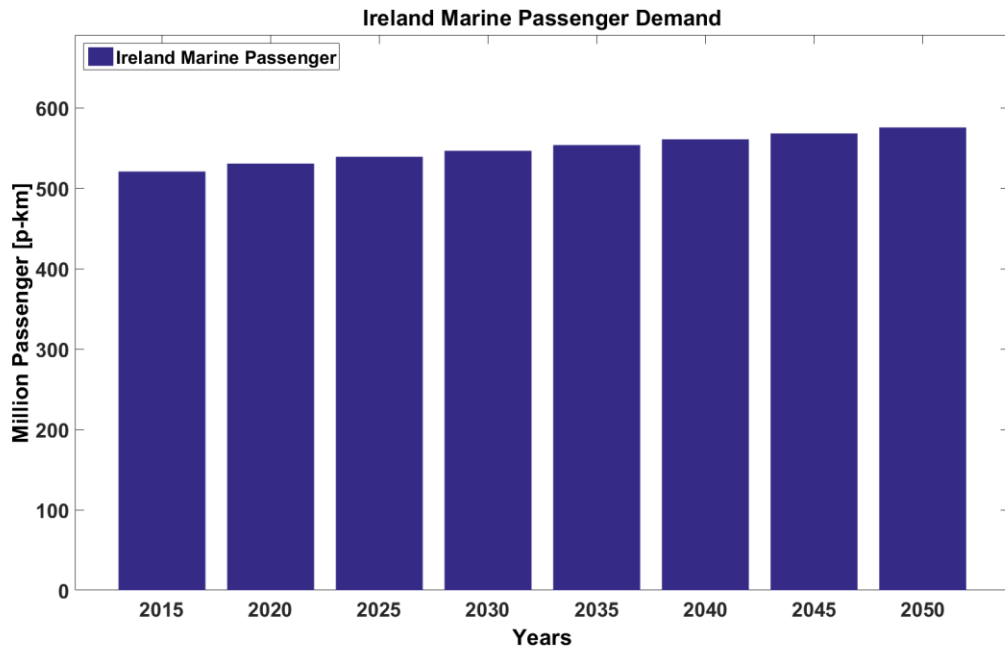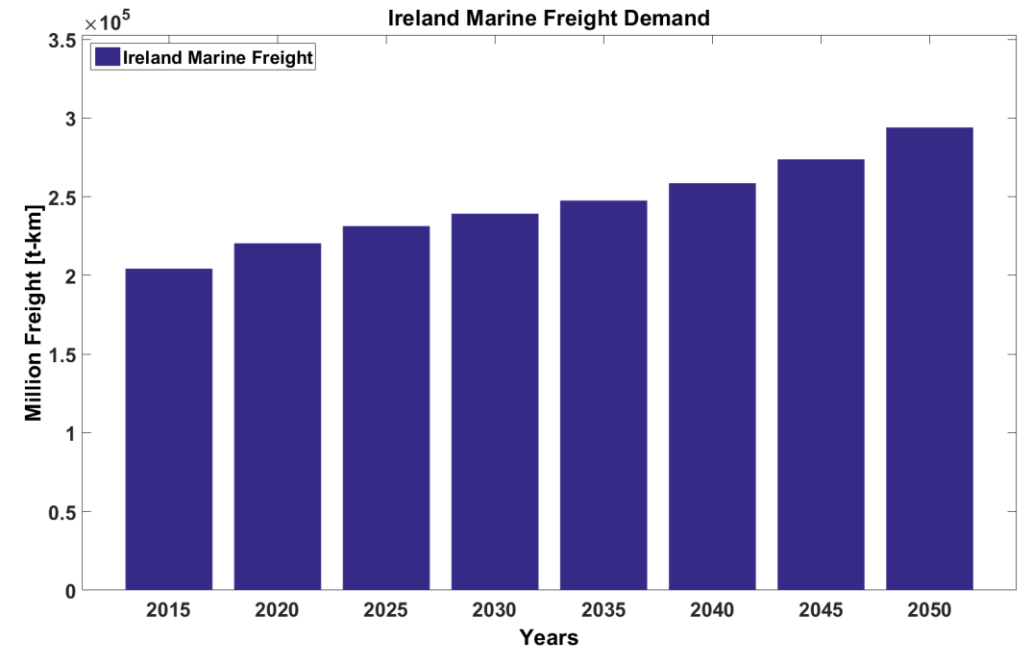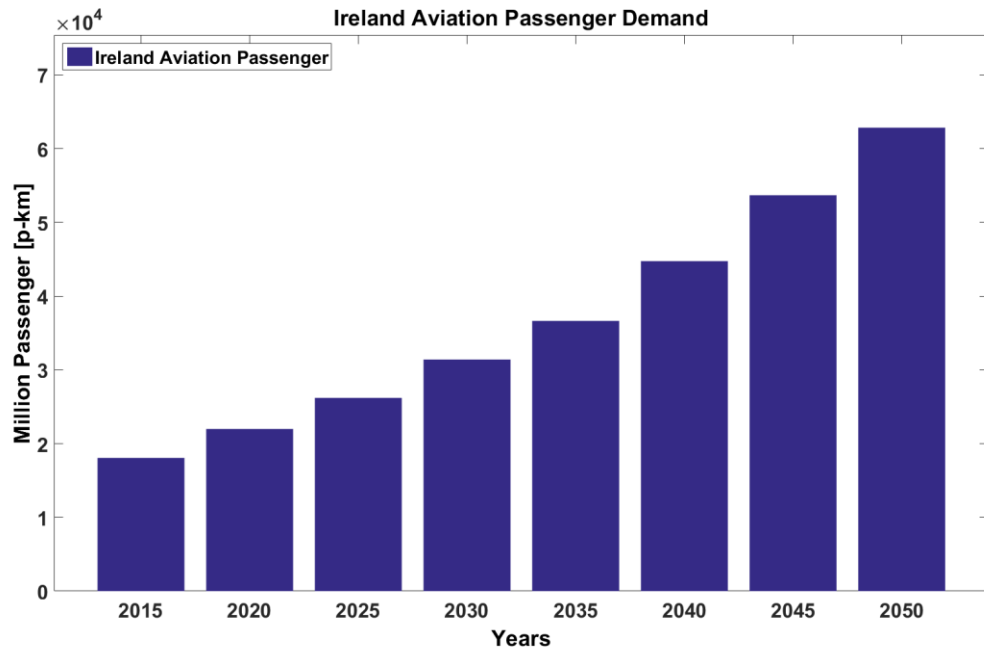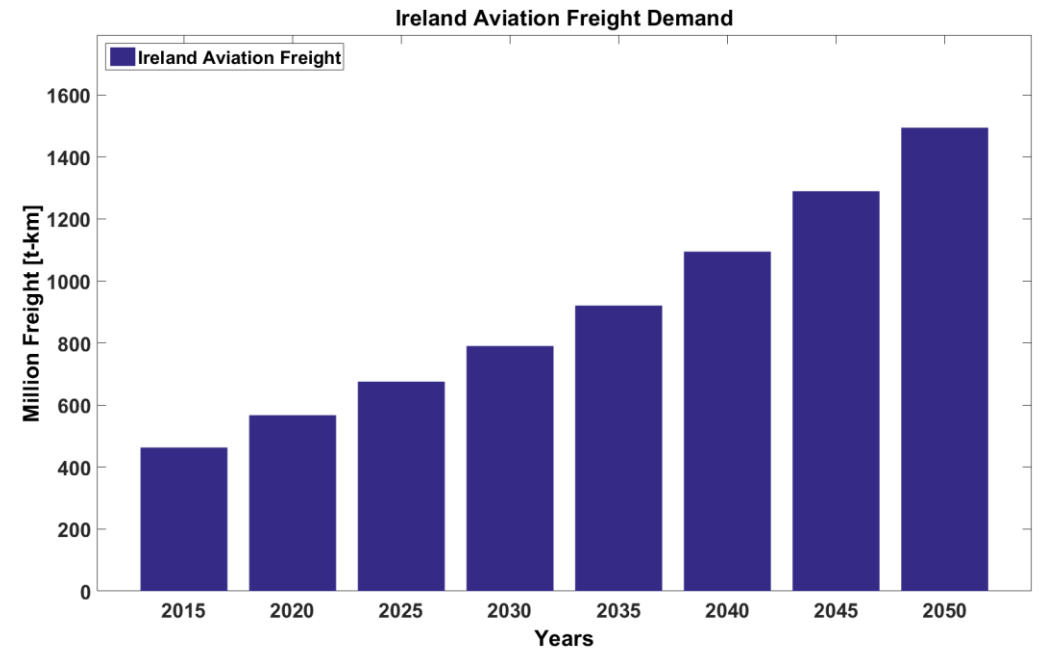

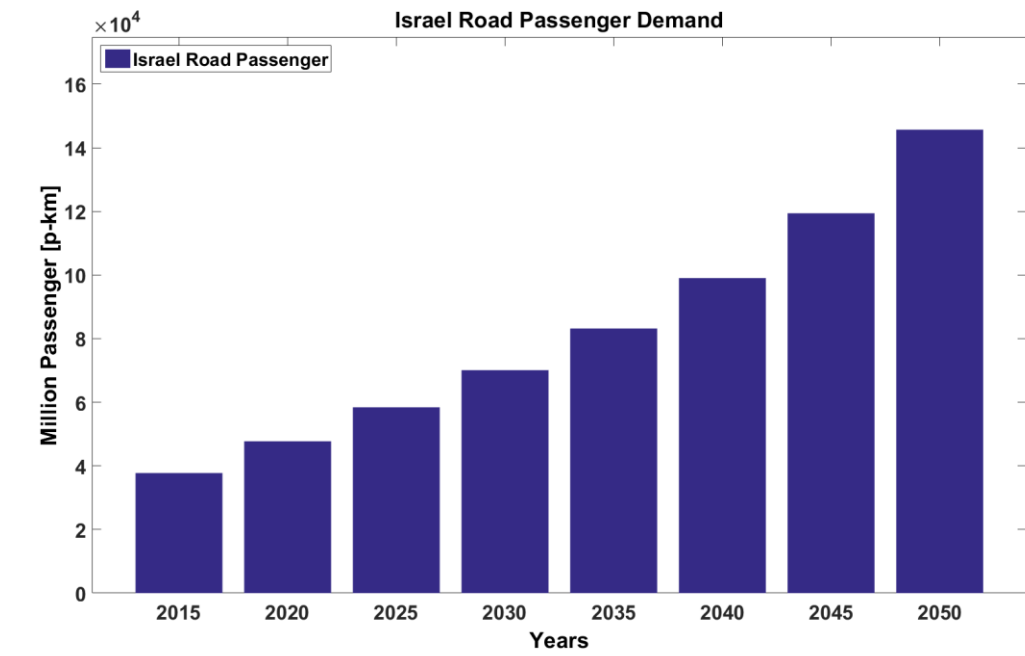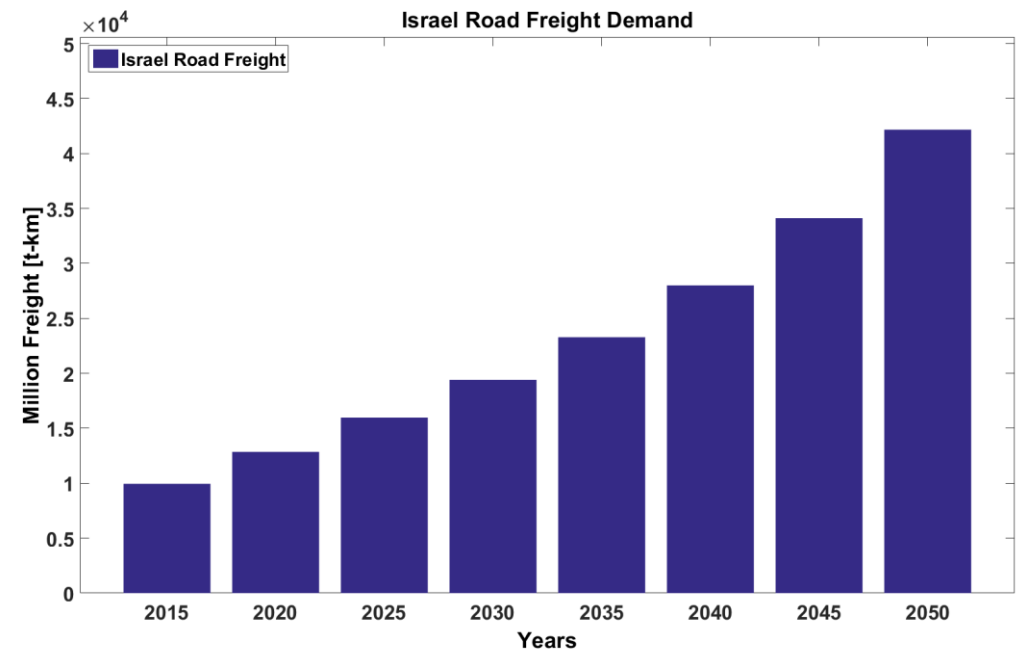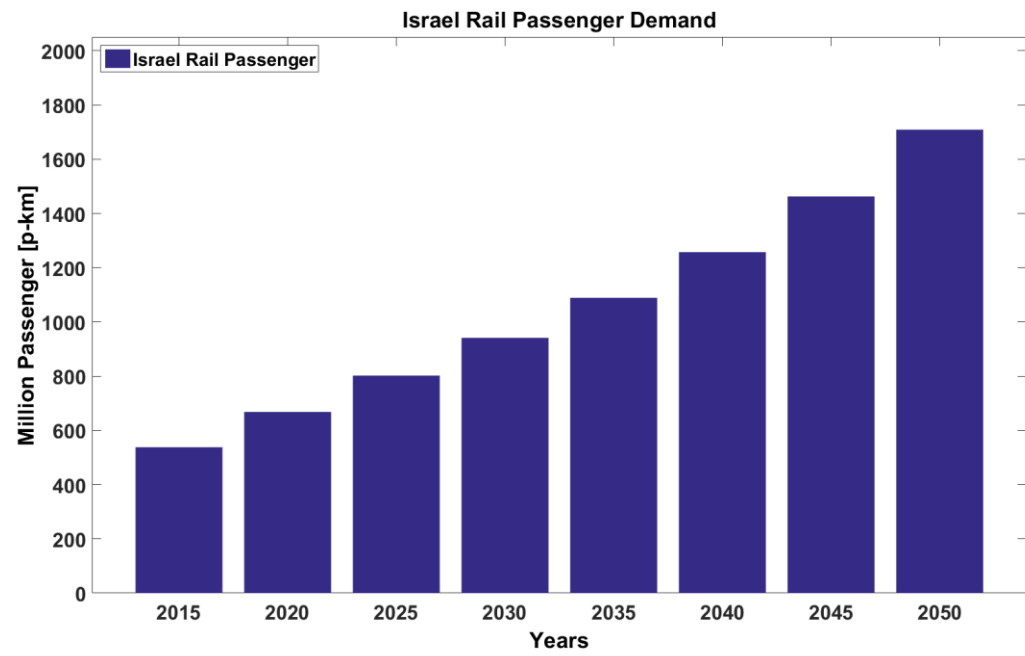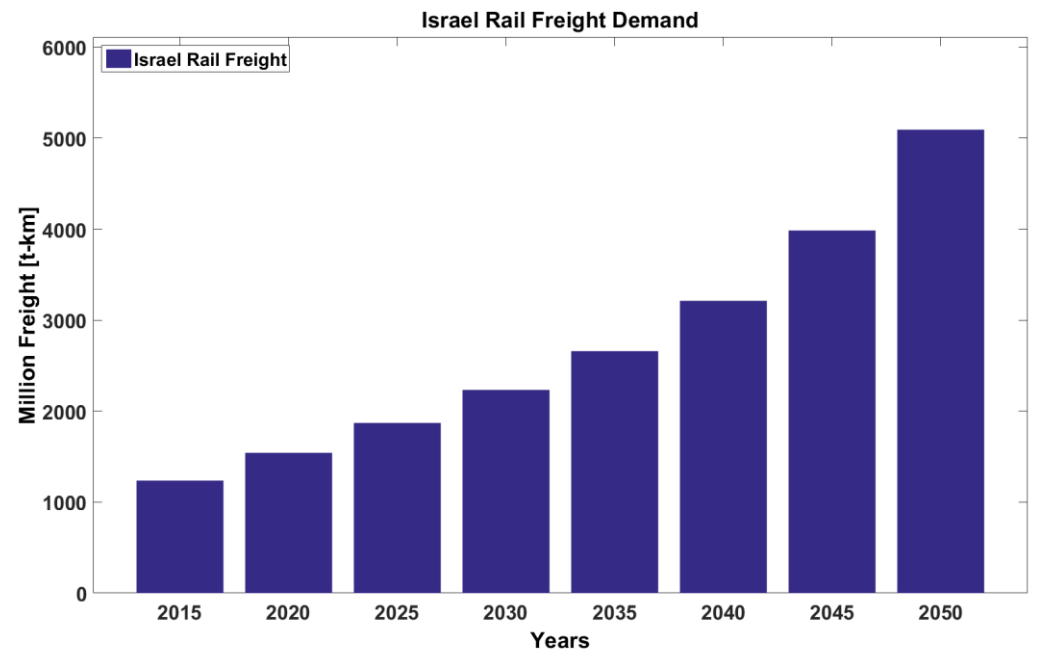

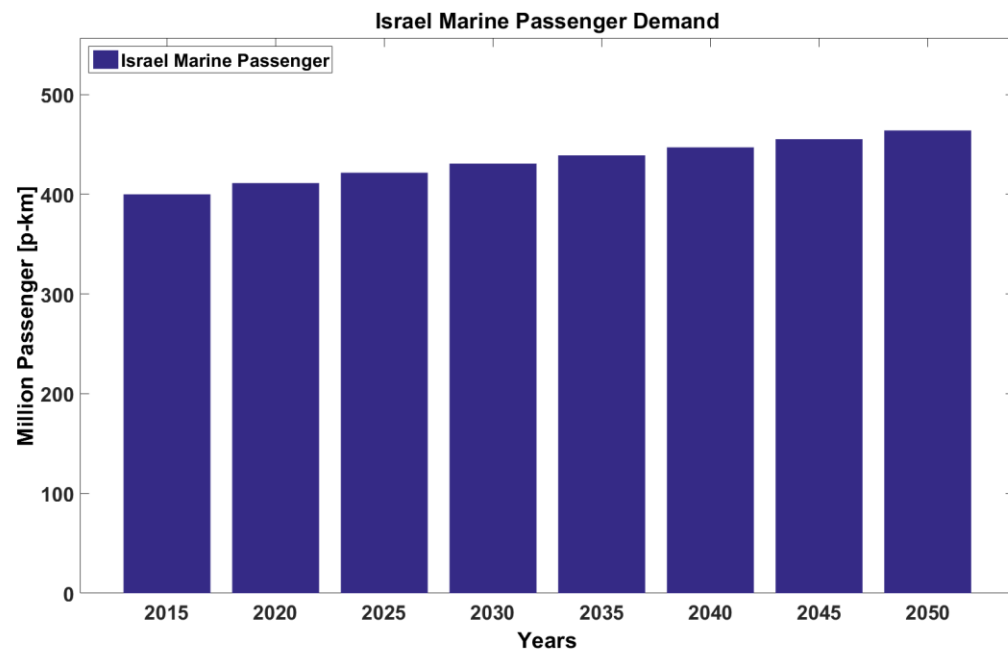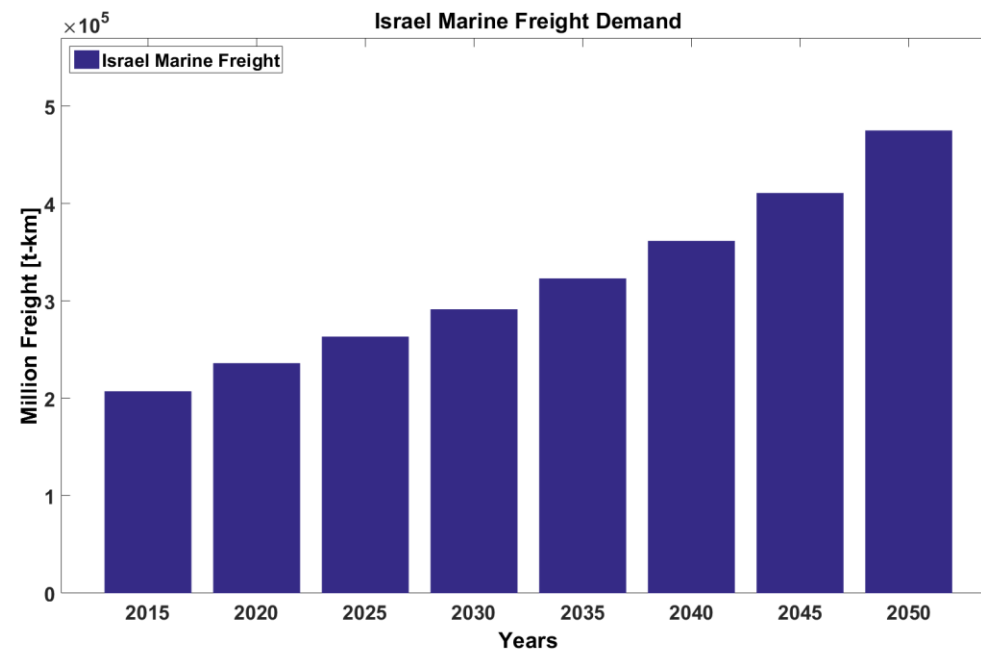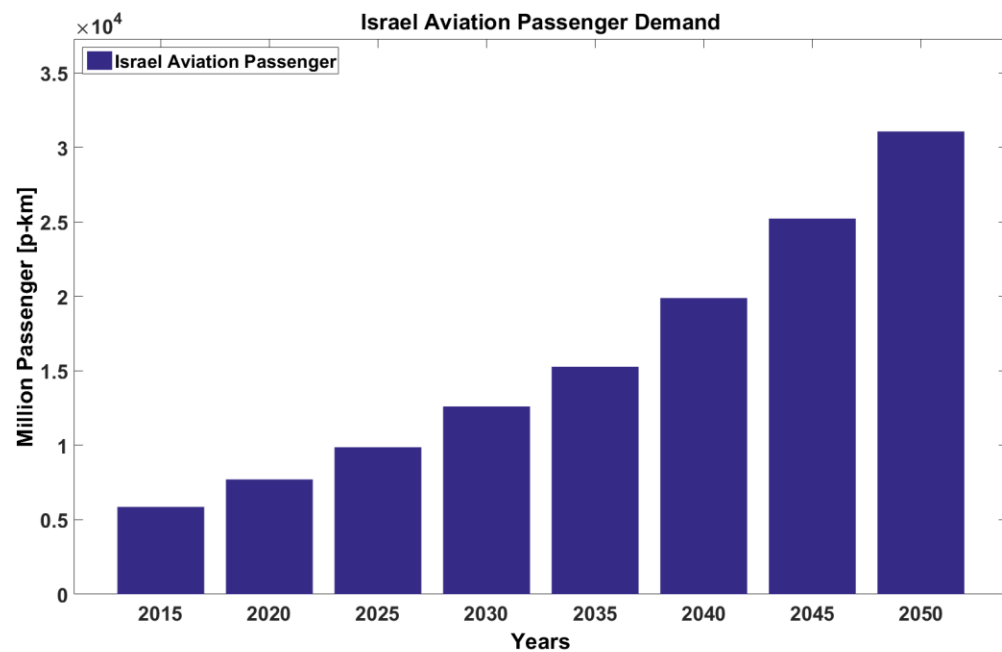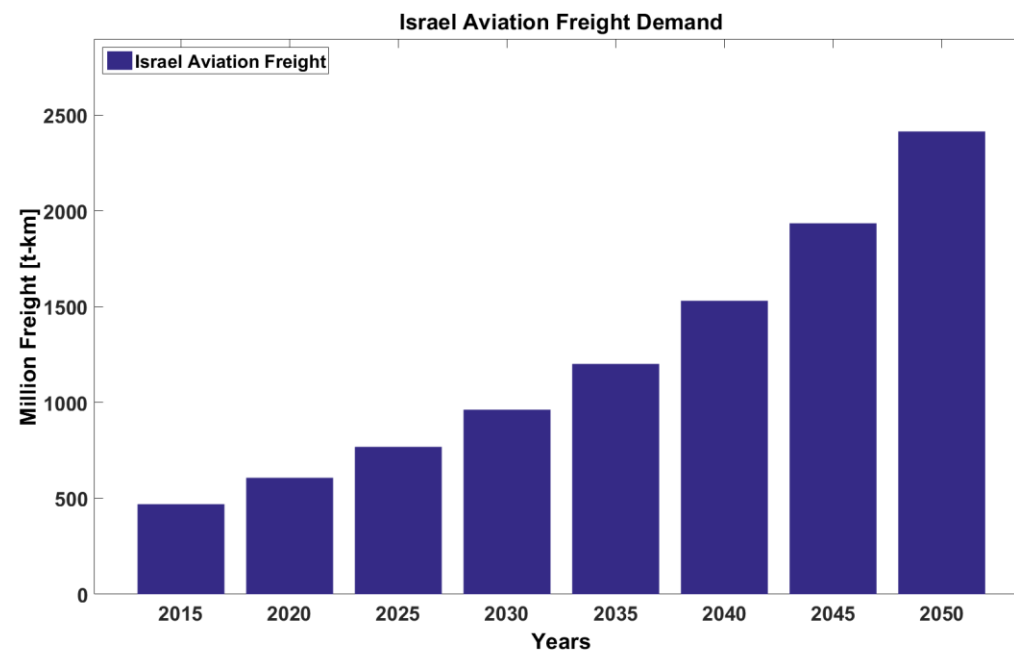

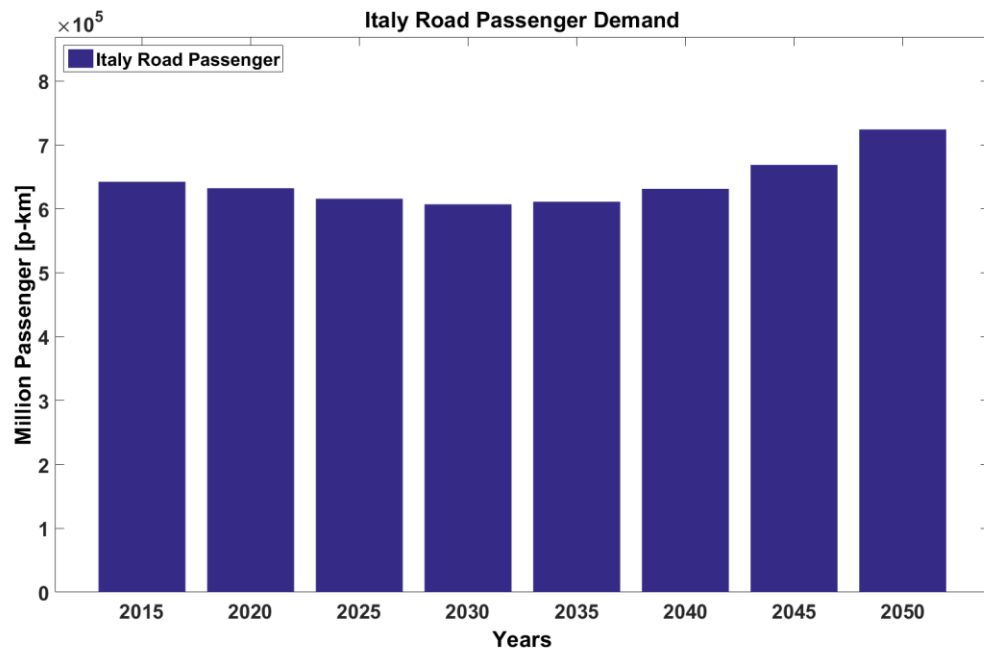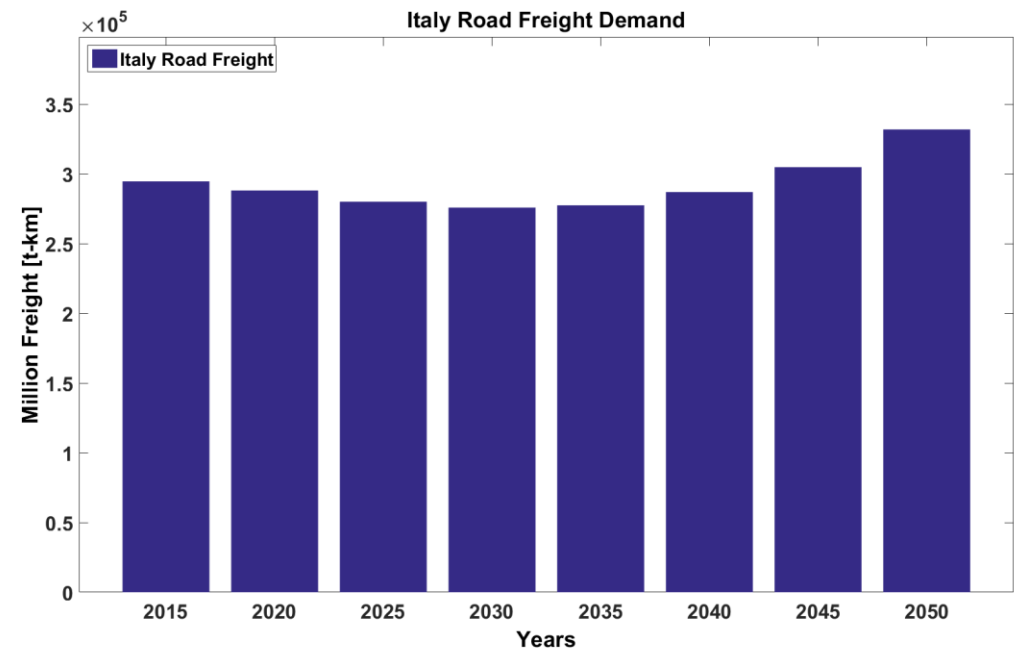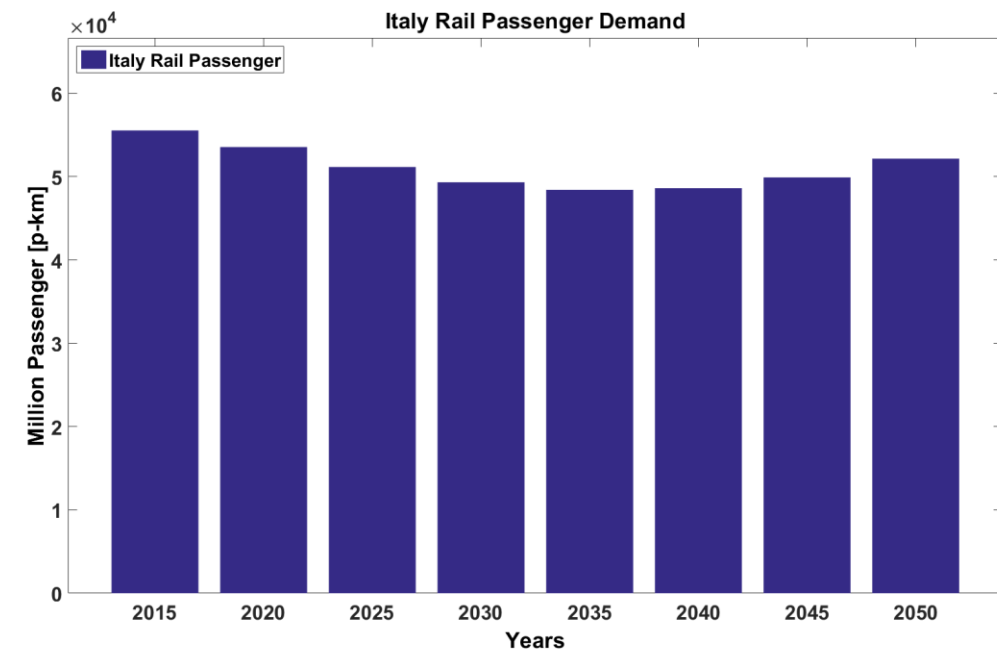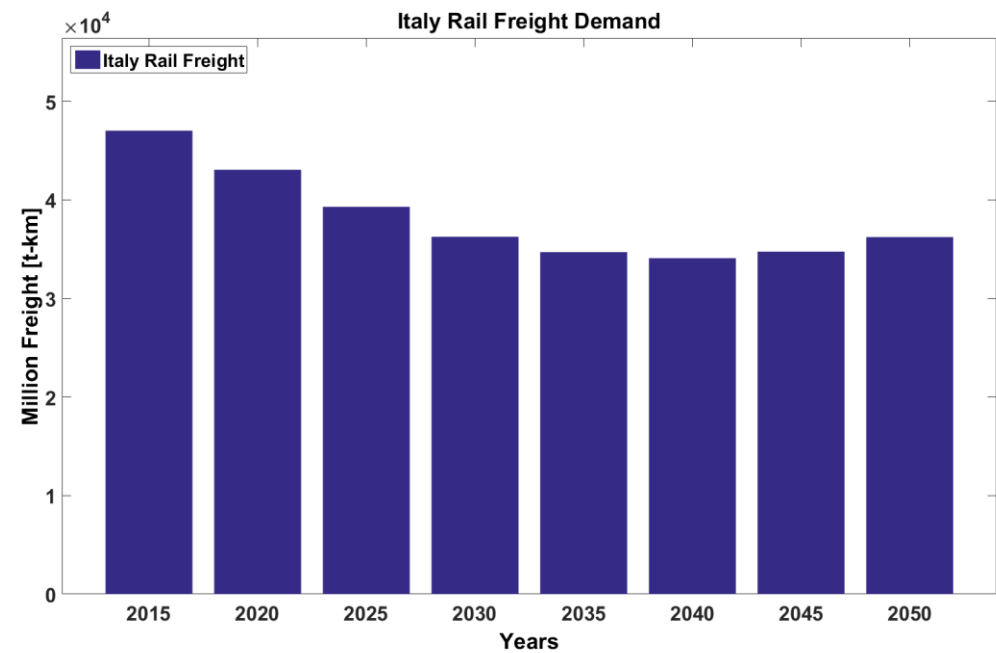

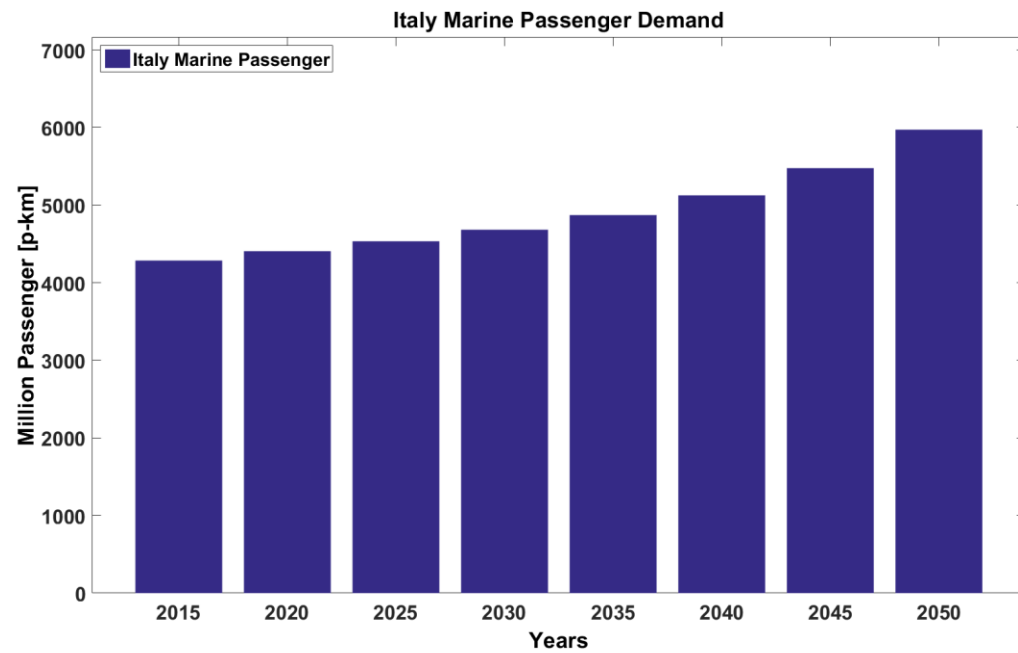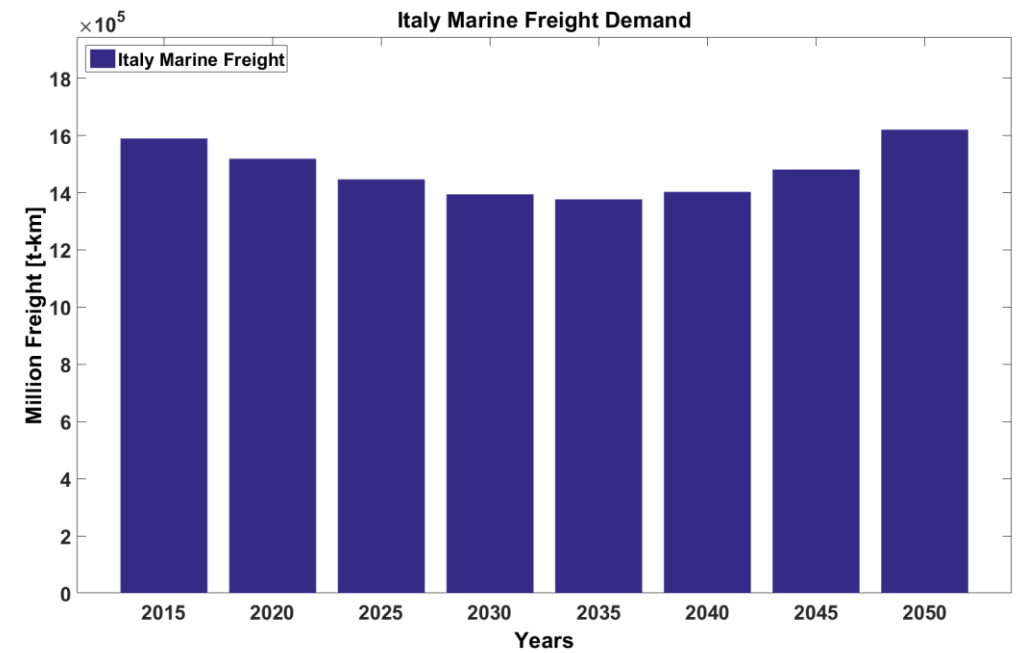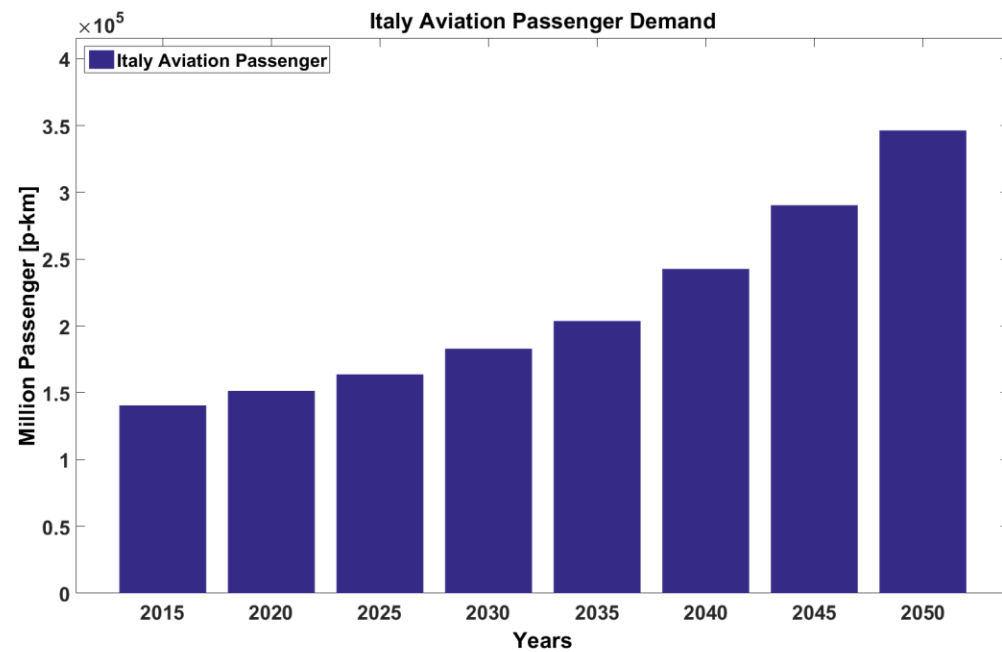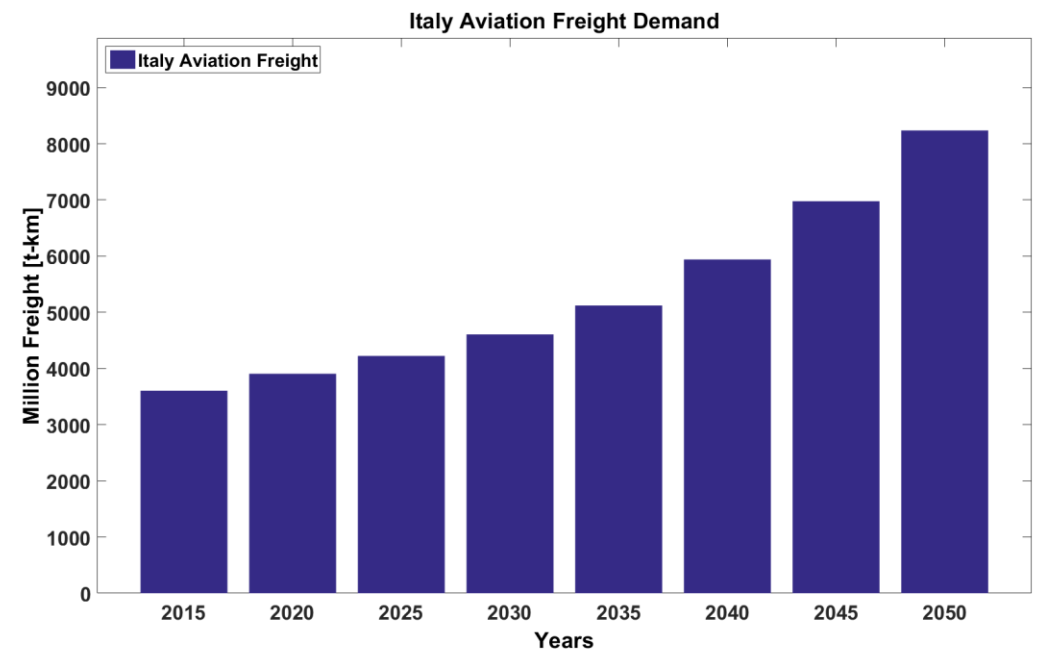

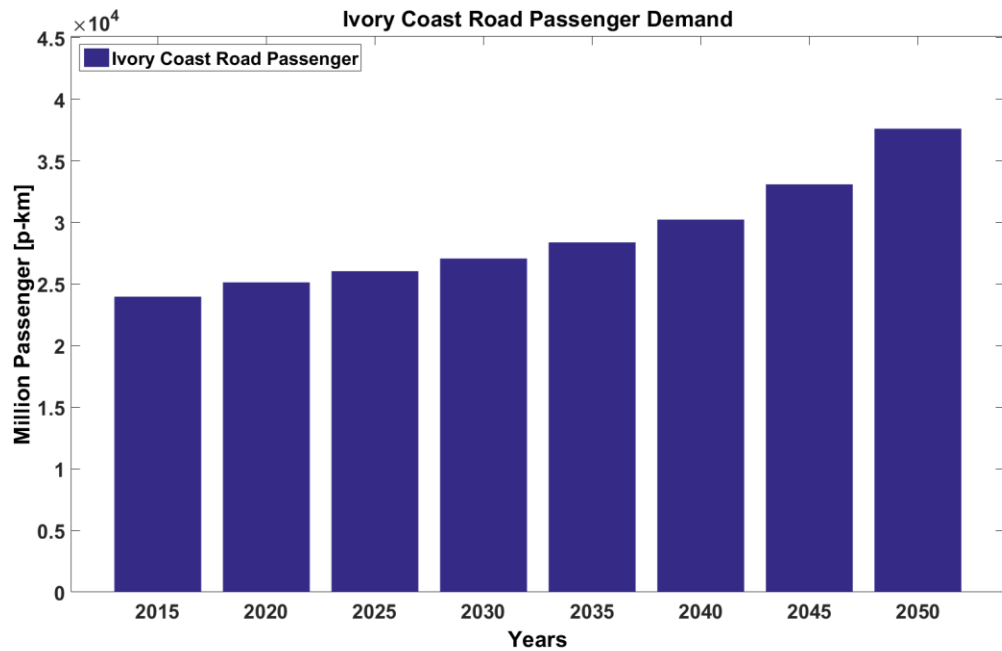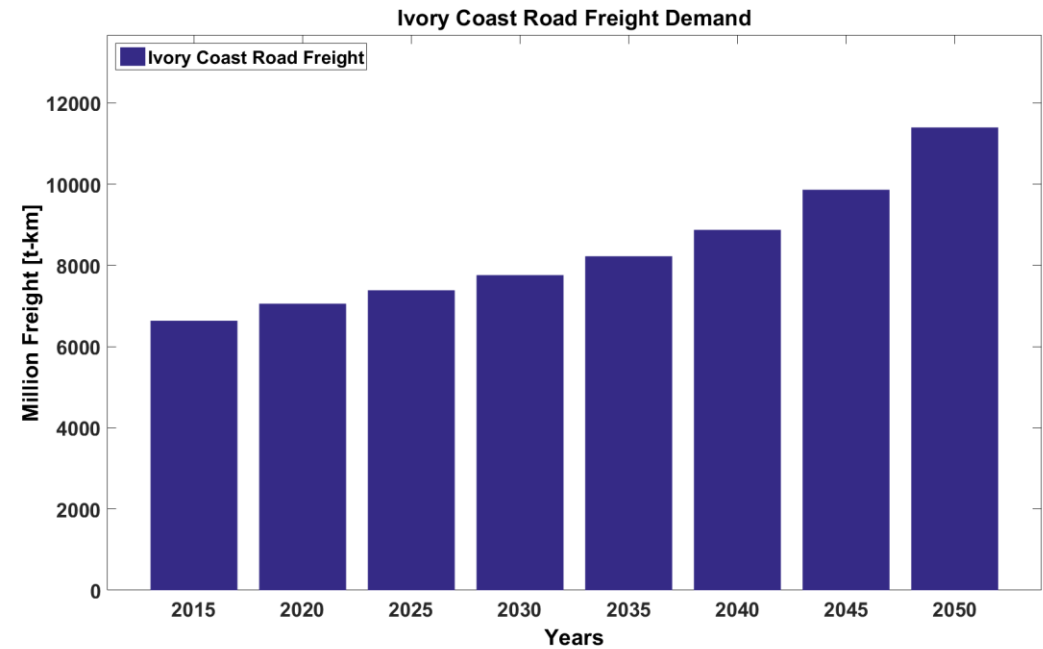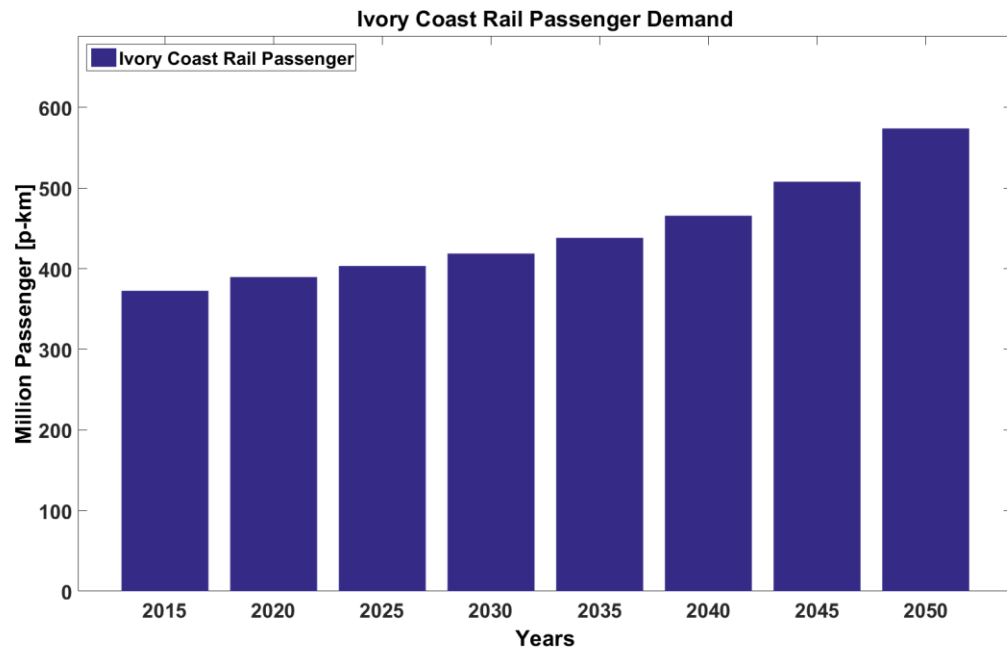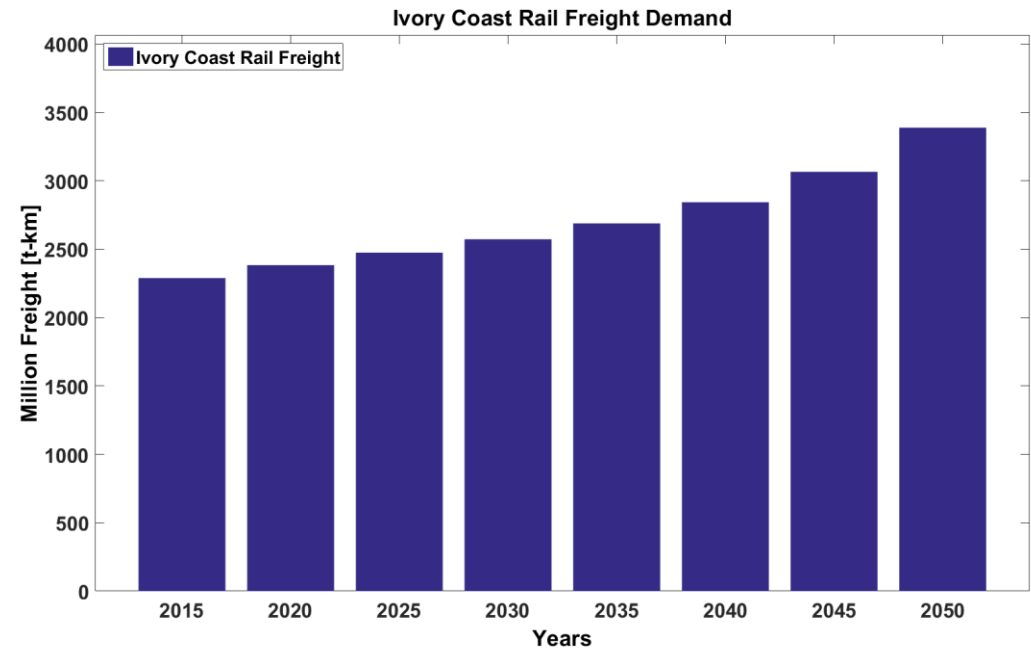

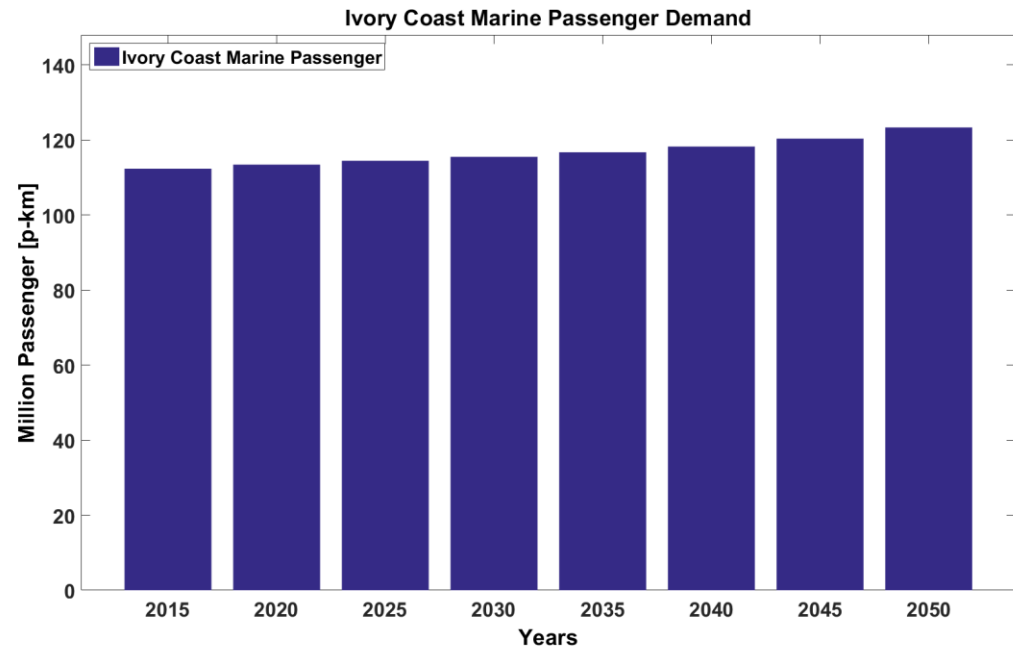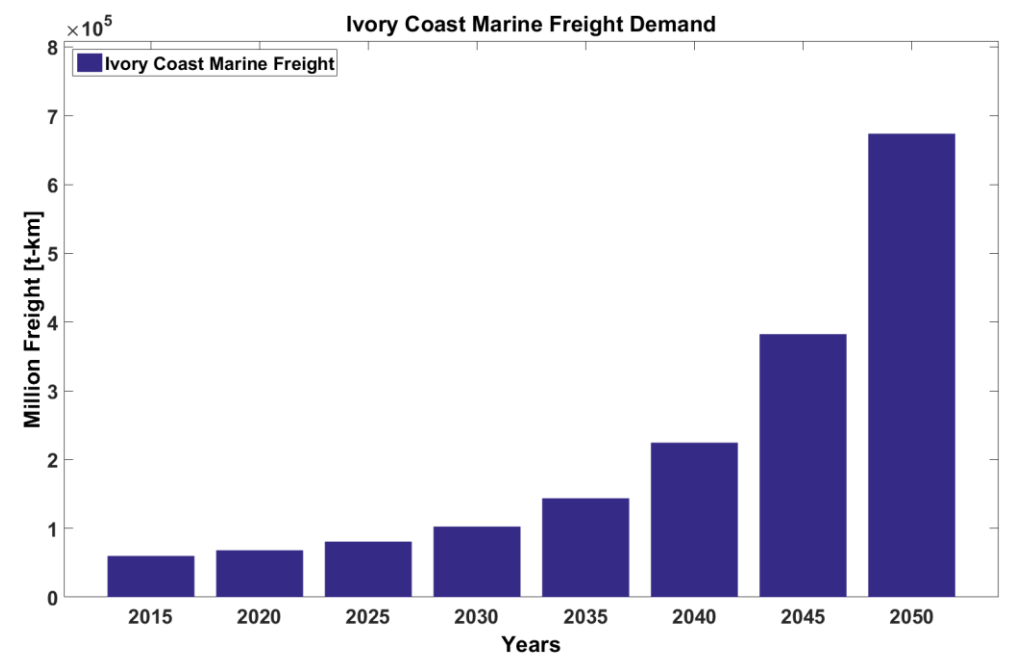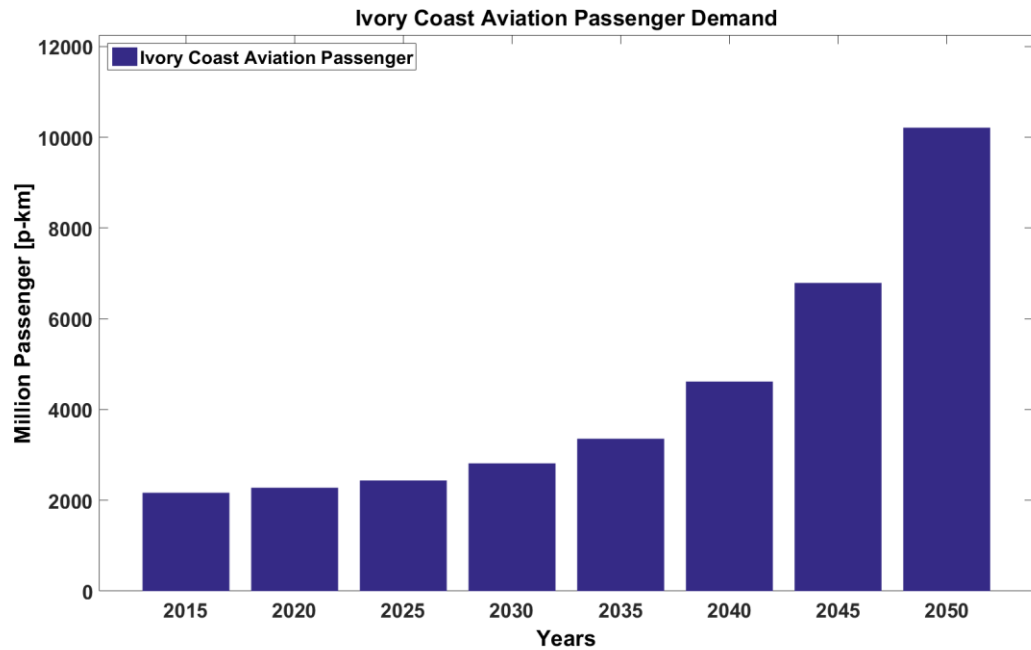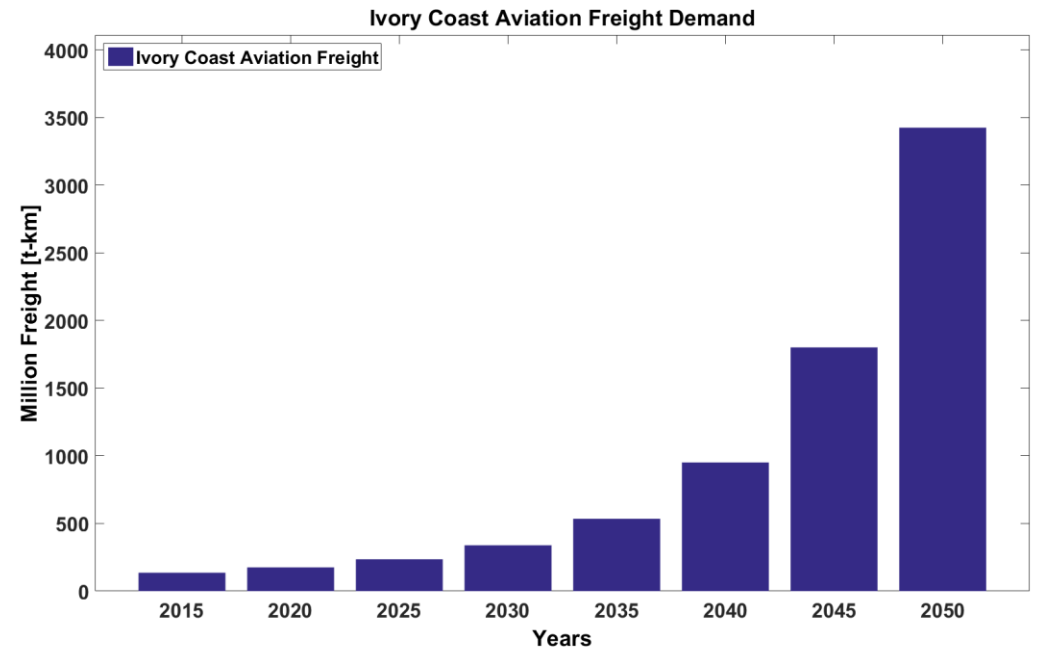

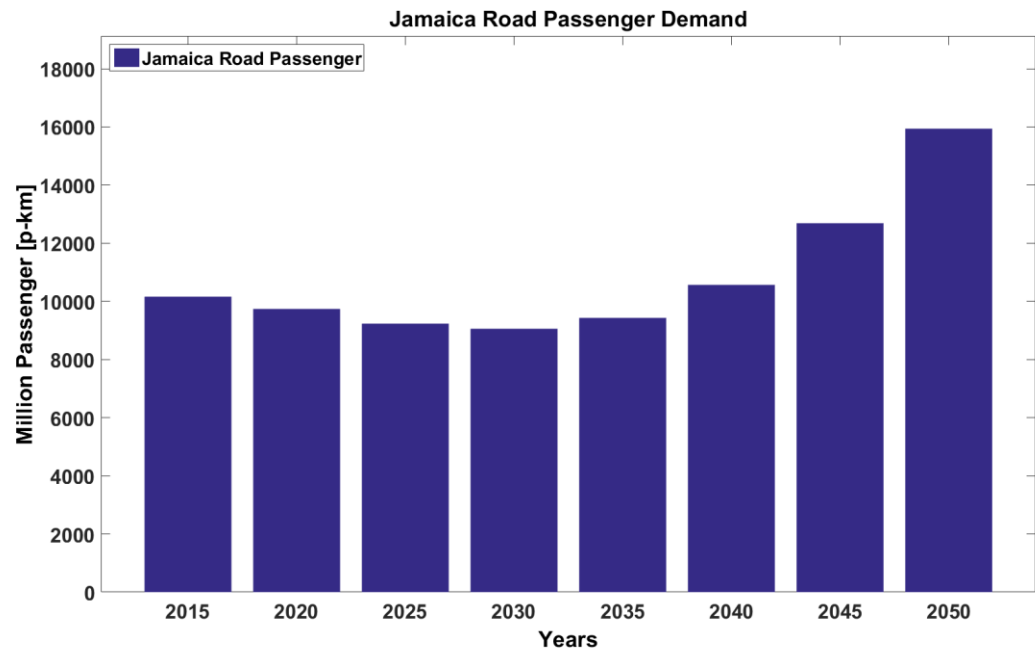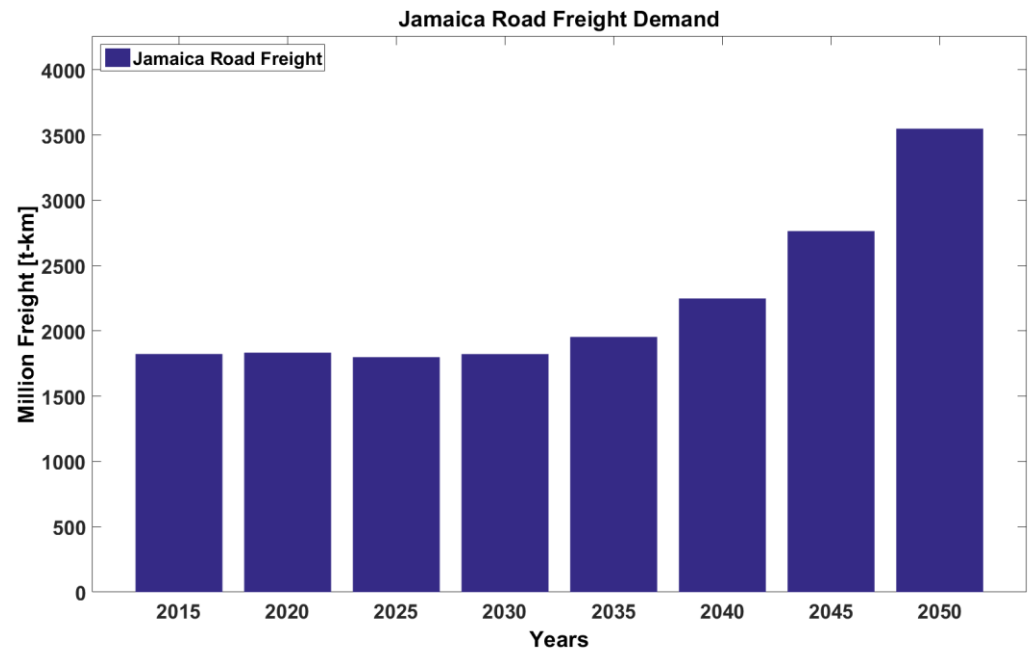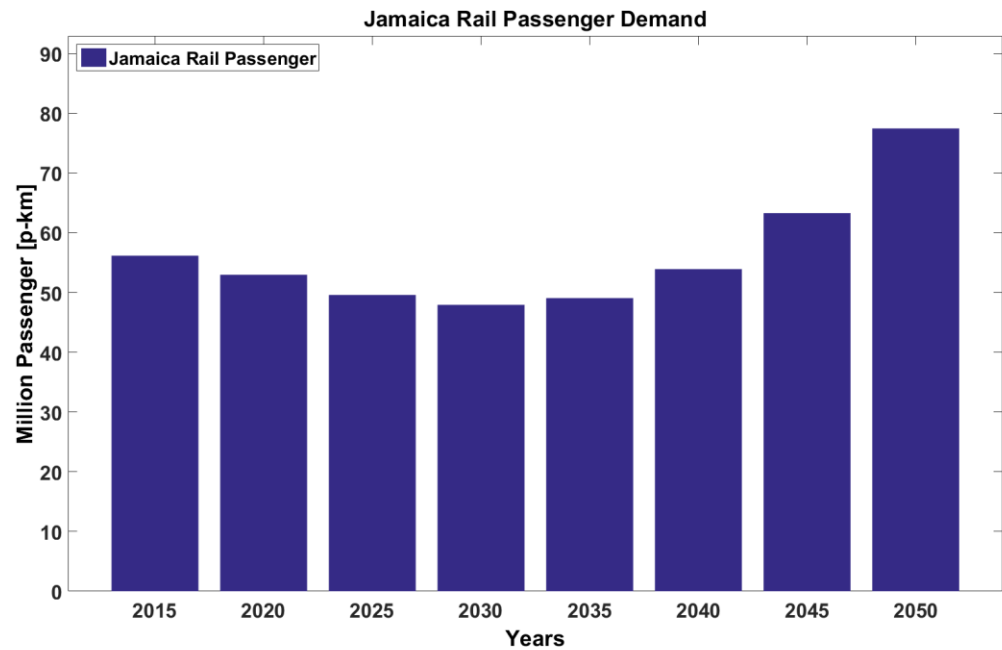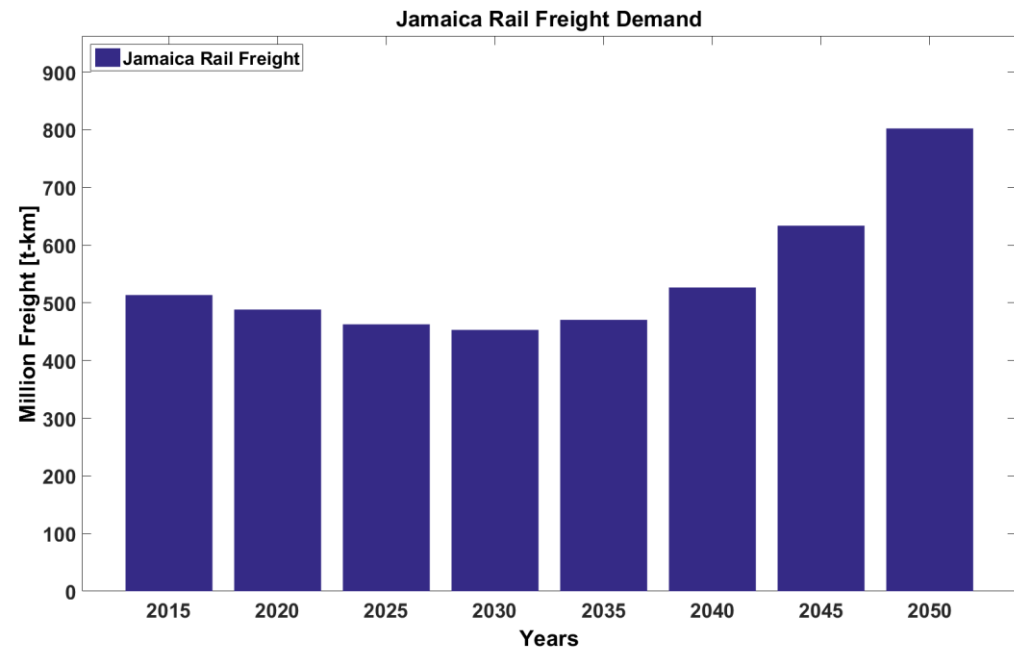

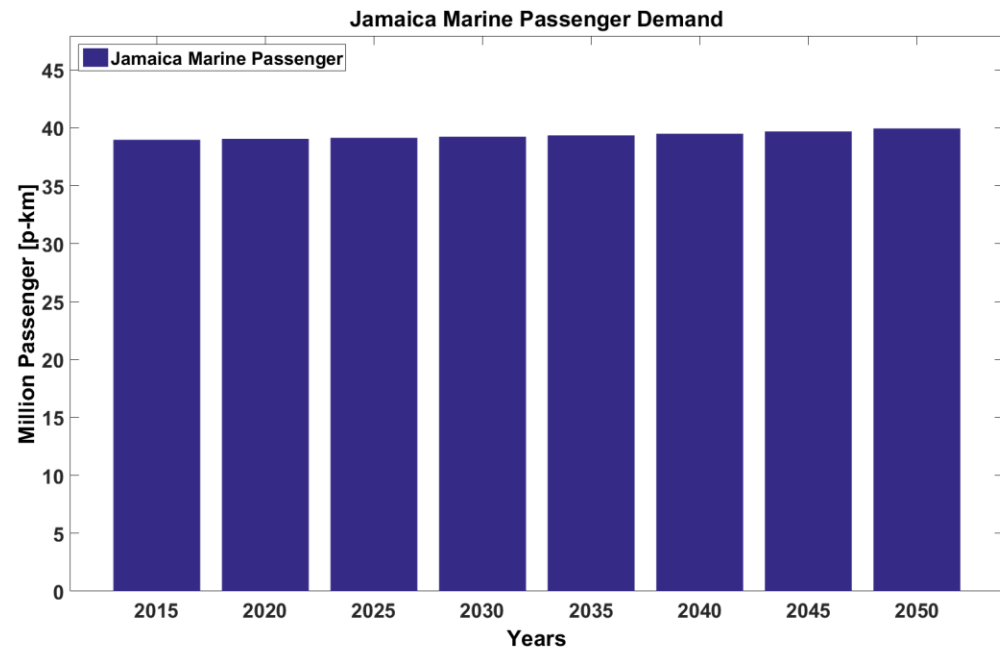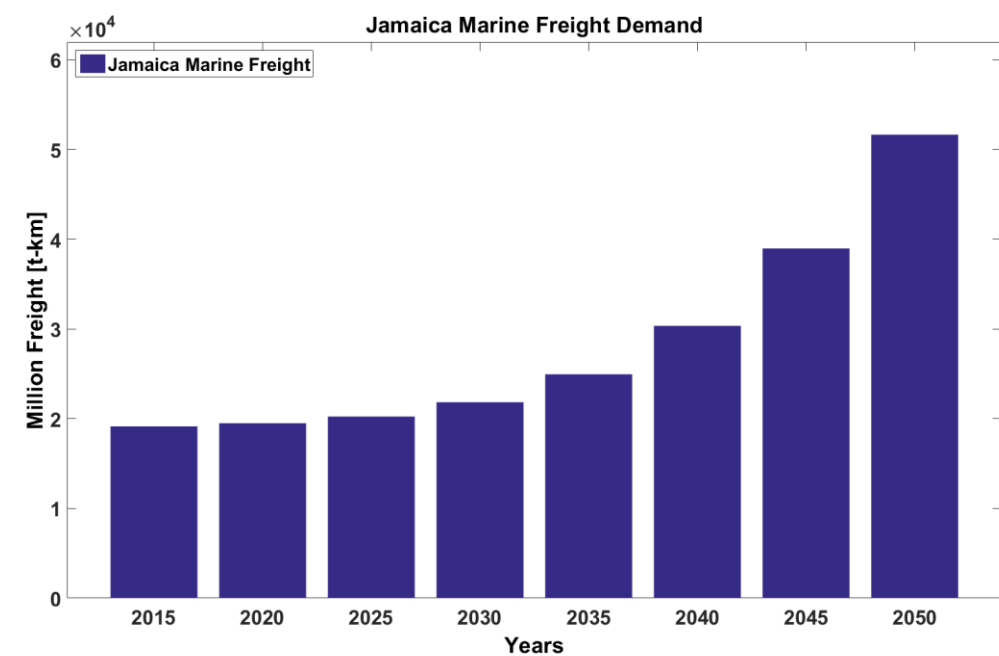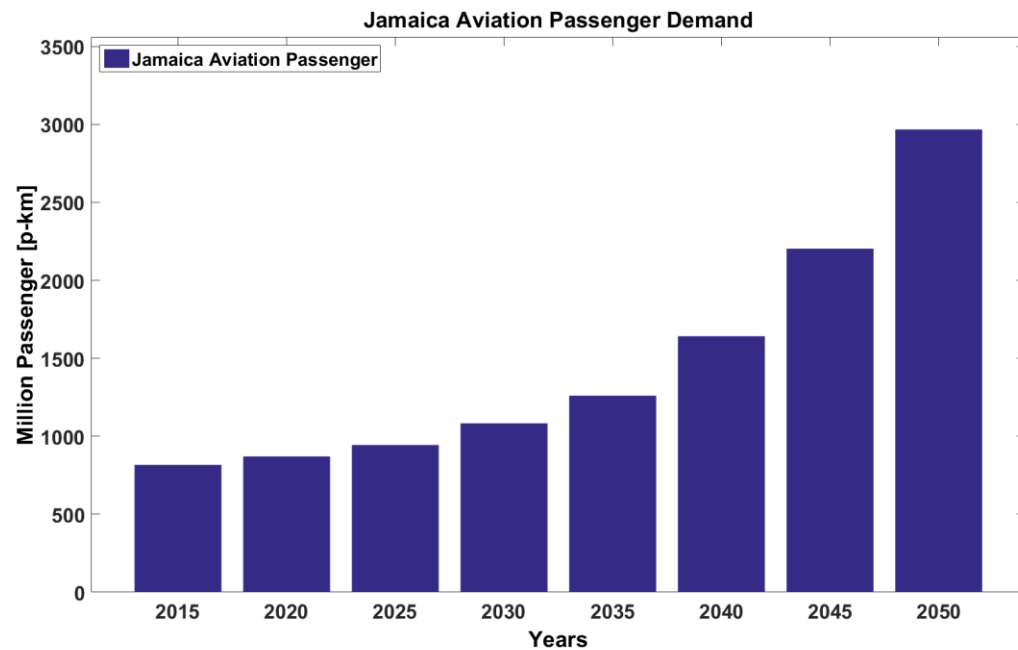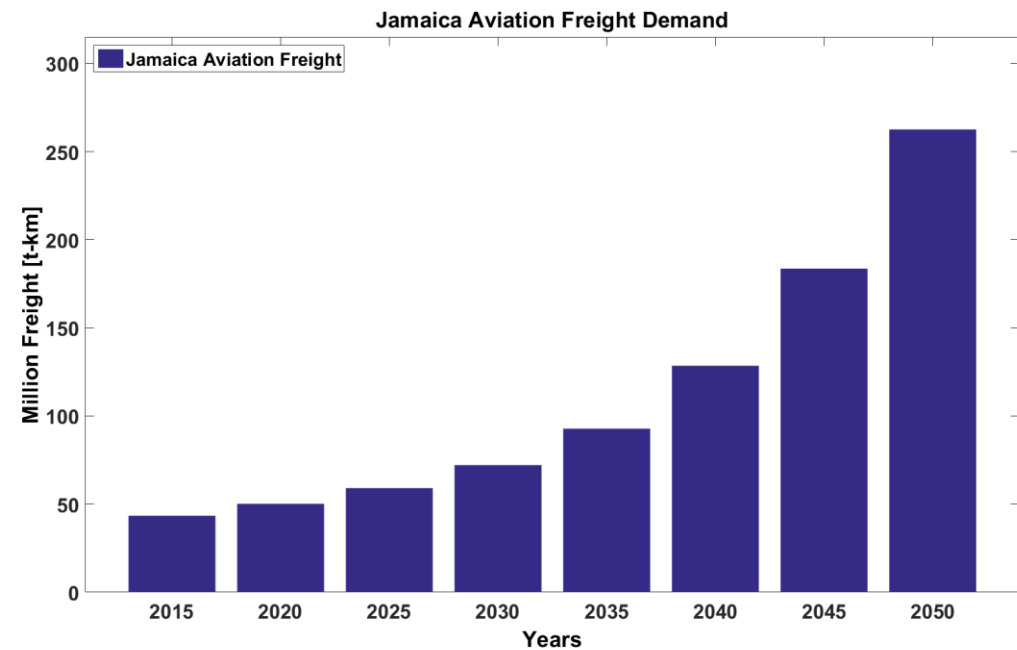

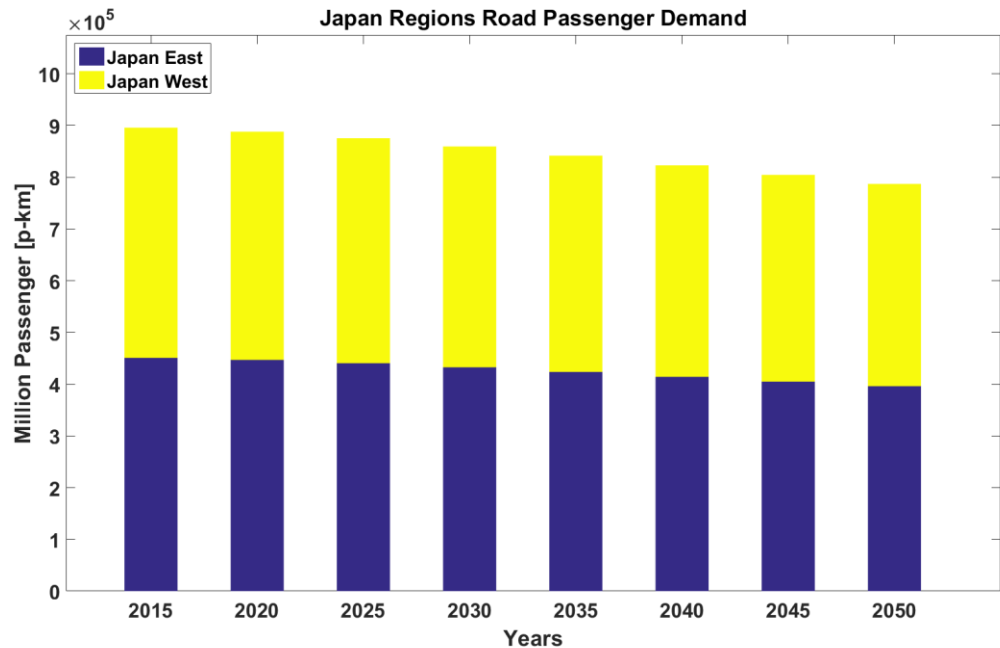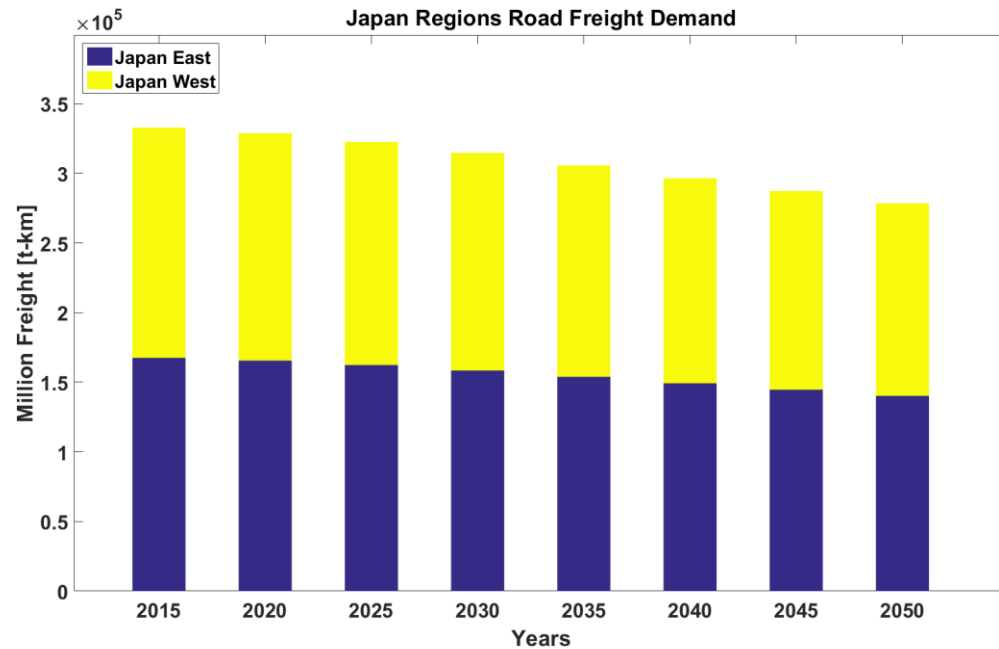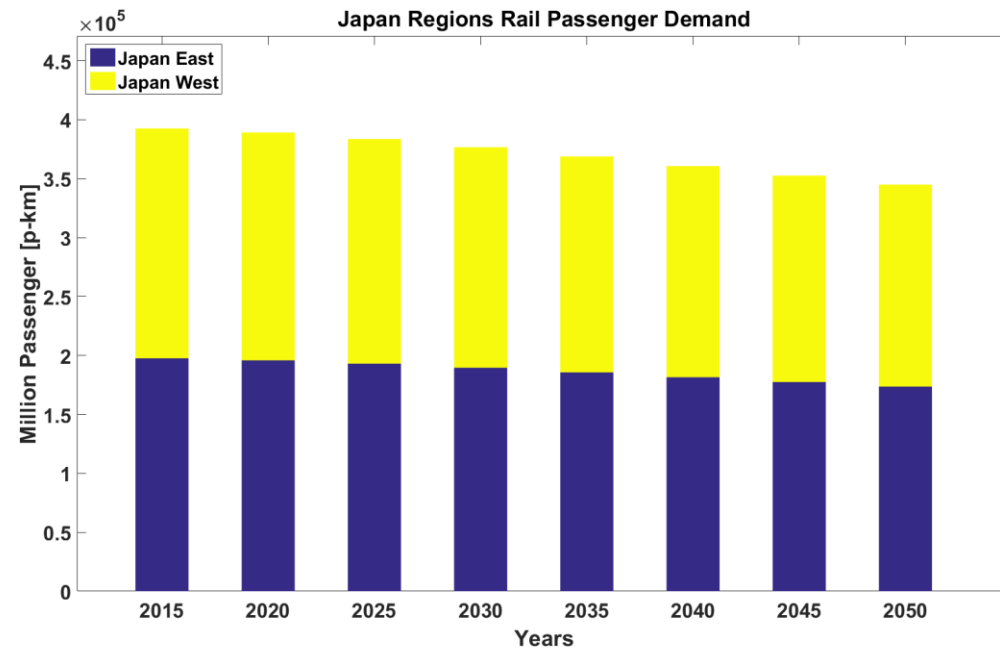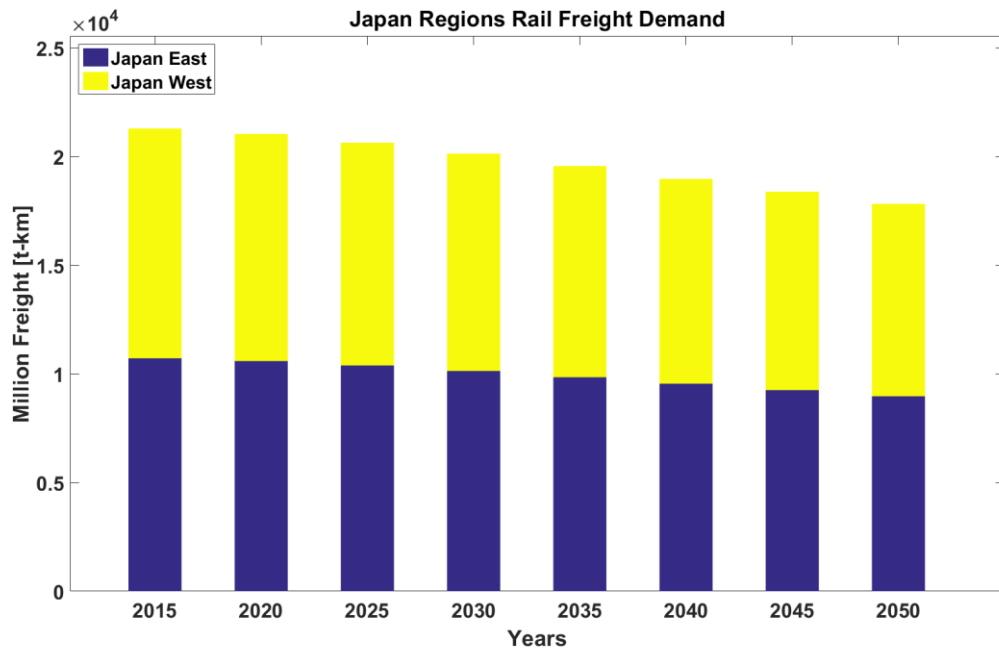

Japan Regions Marine Passenger Demand

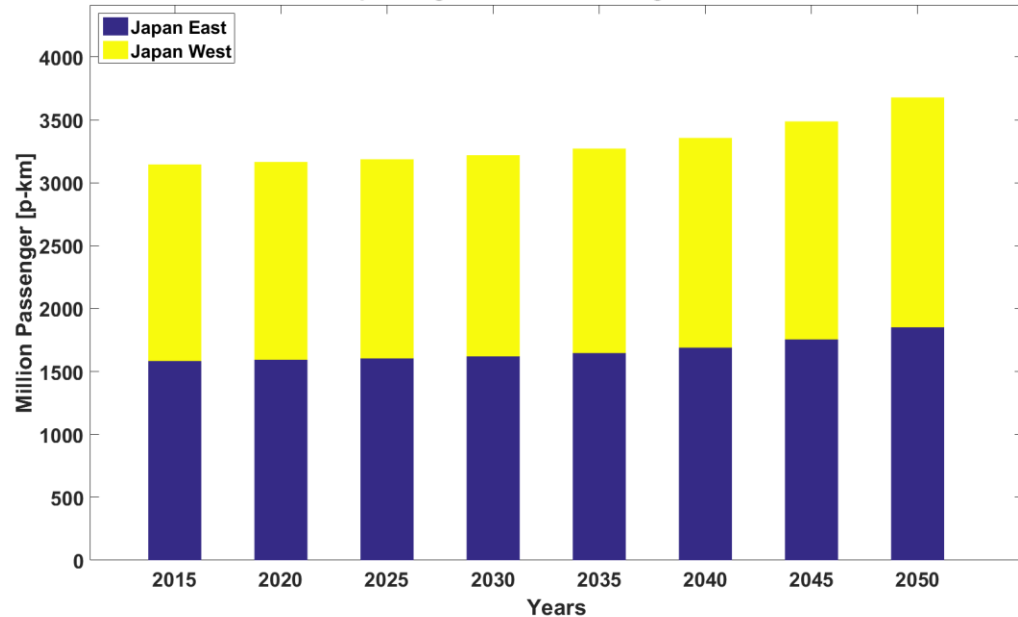

Japan Regions Marine Freight Demand

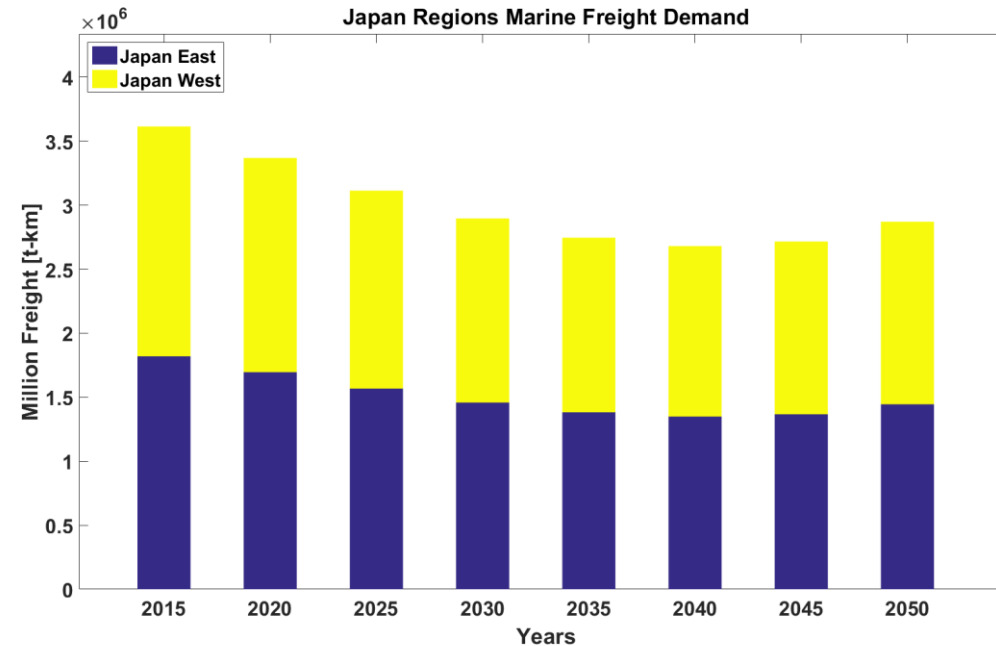

Japan Regions Aviation Passenger Demand

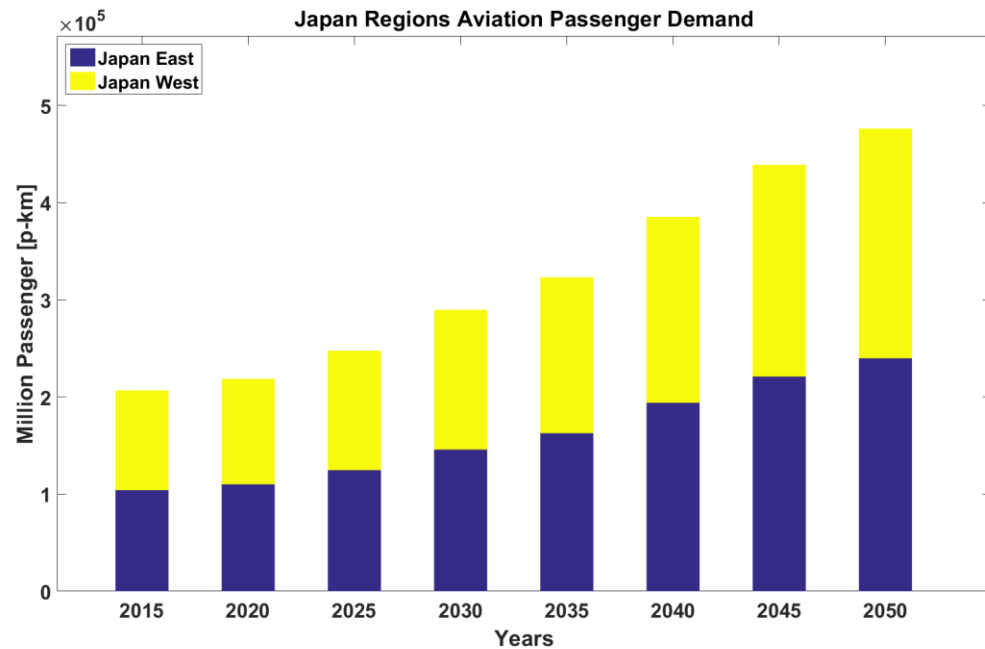

Japan Regions Aviation Freight Demand

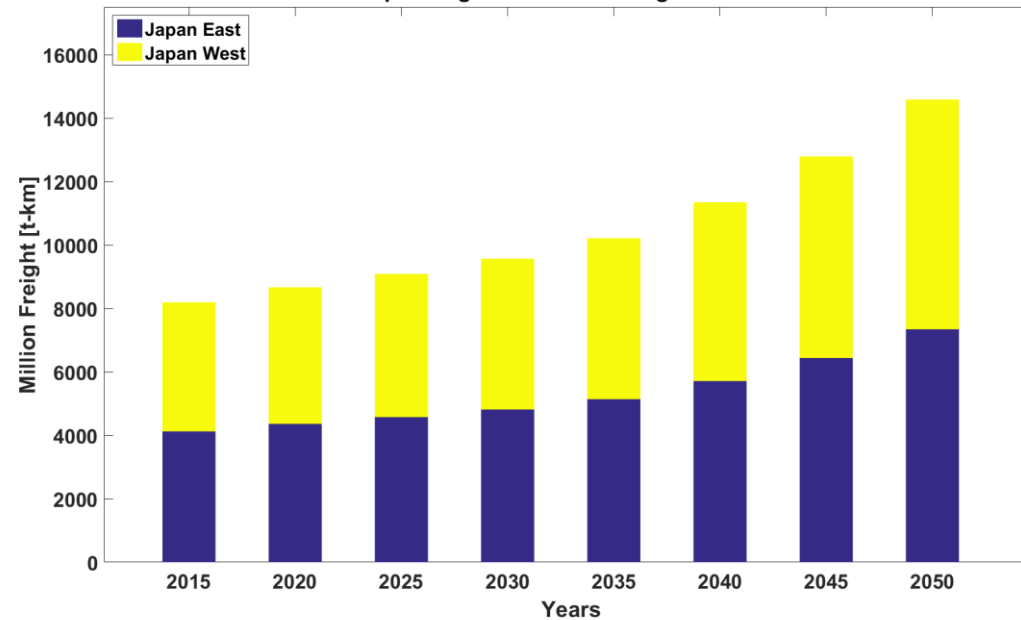

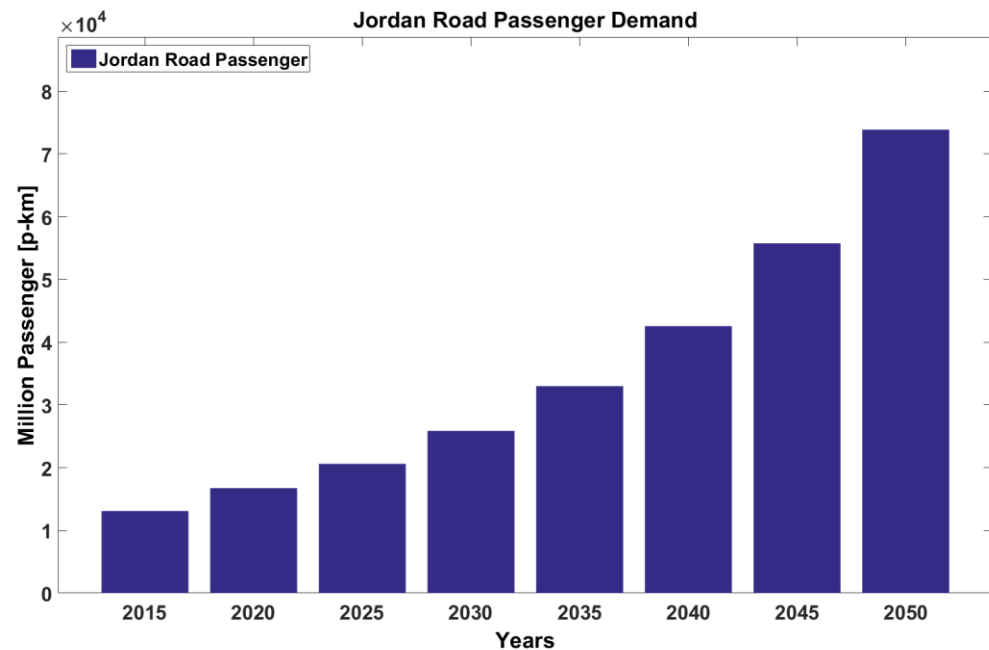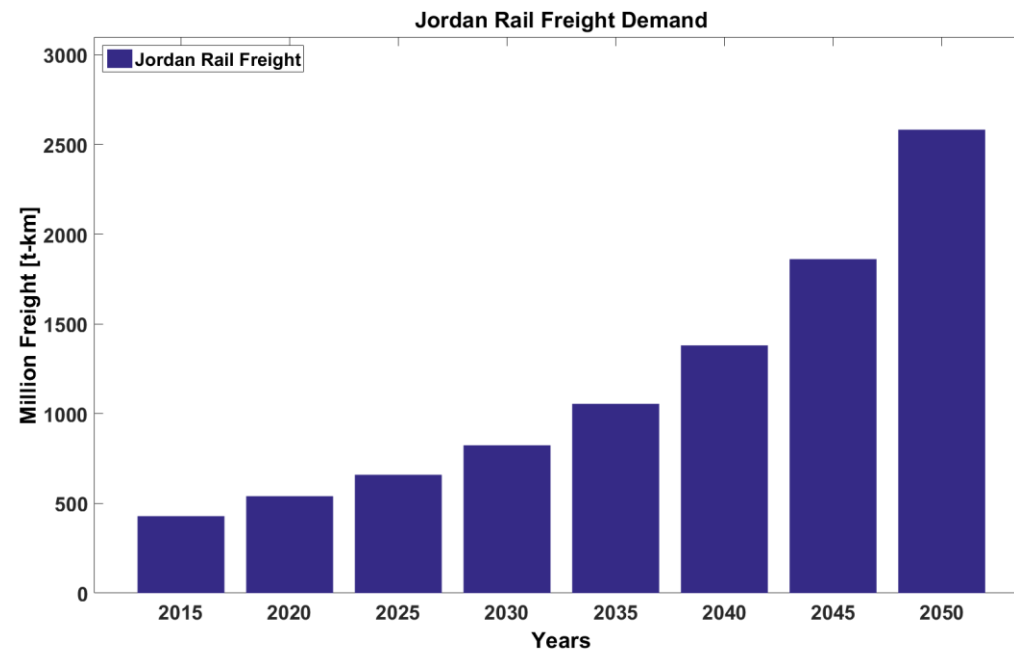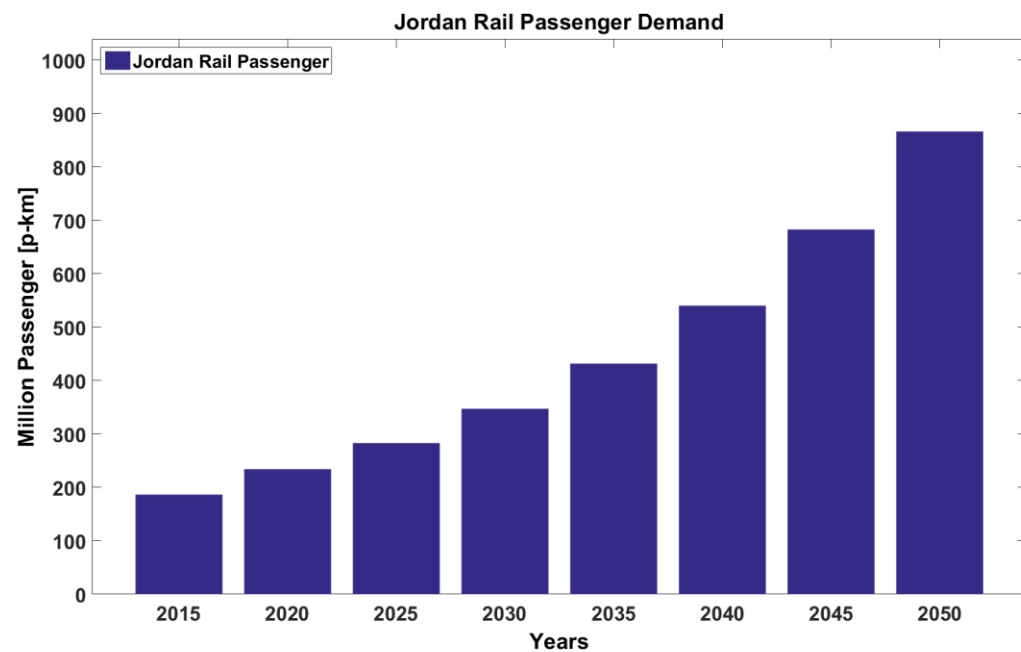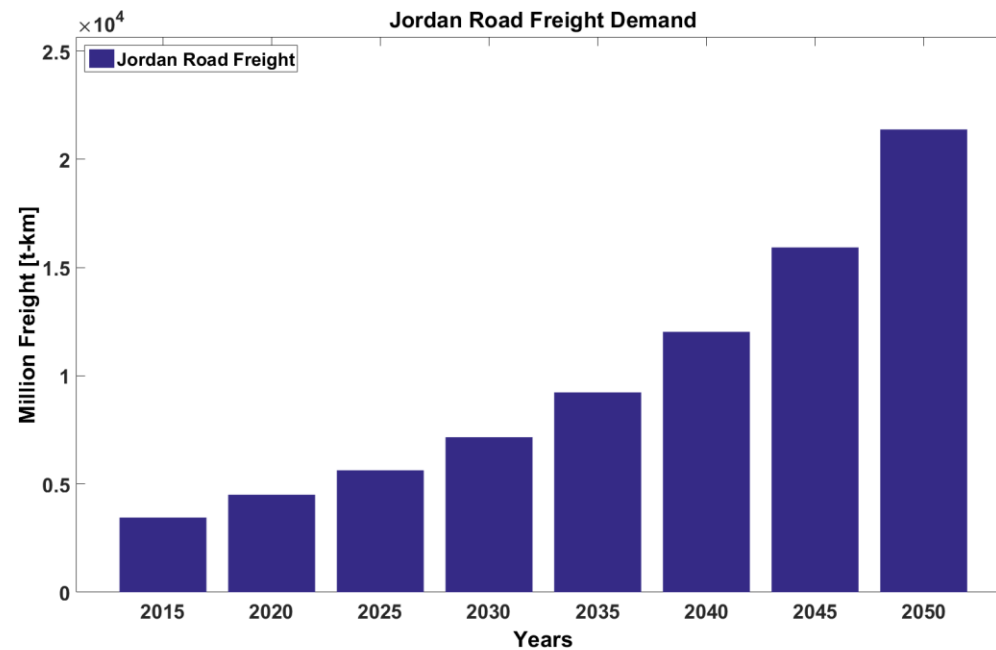

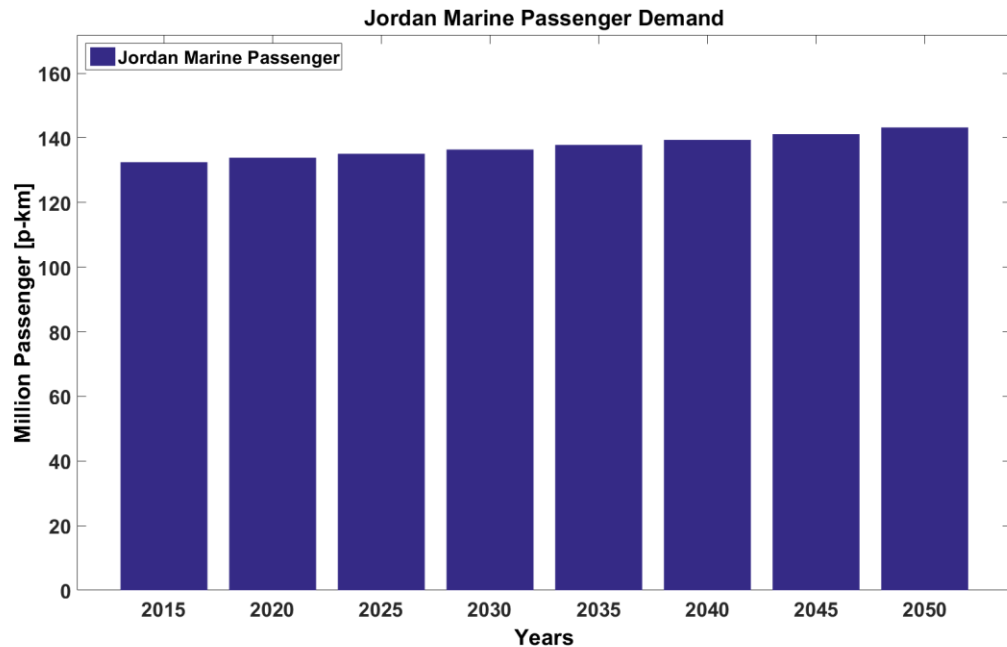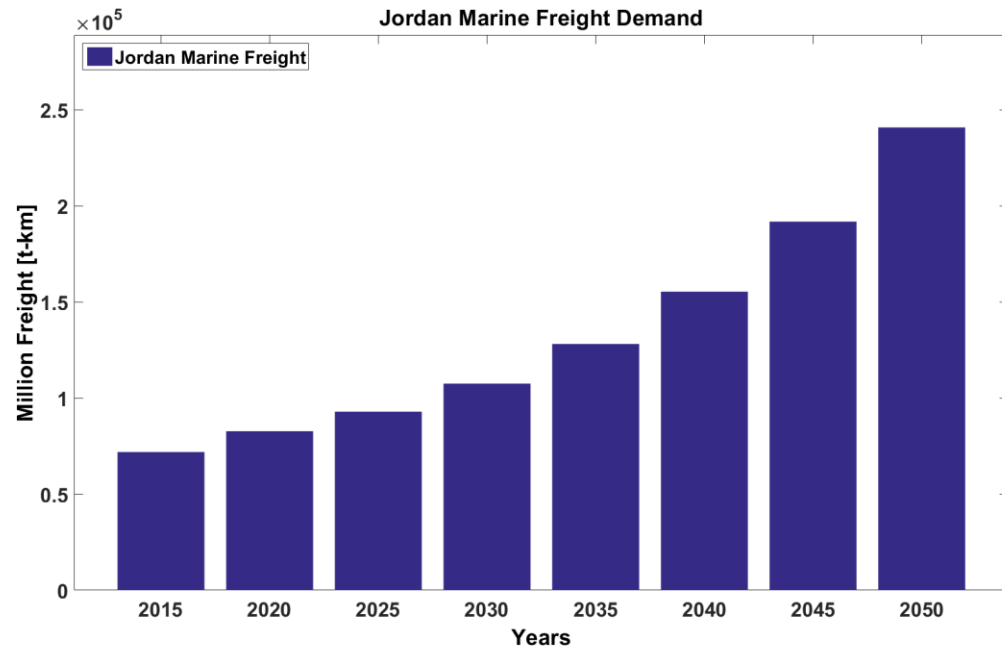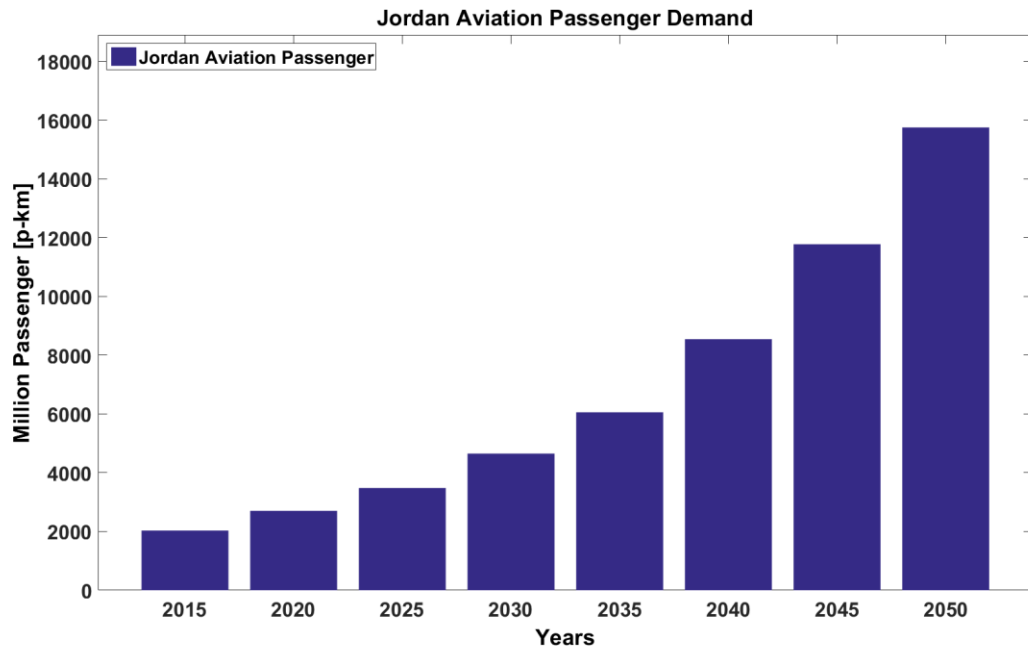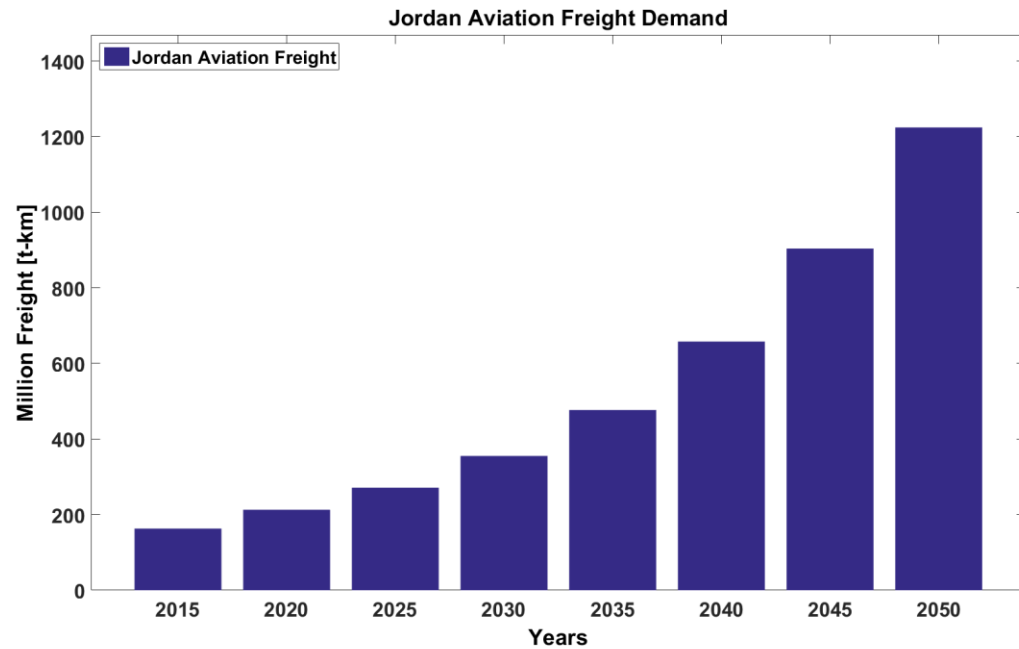

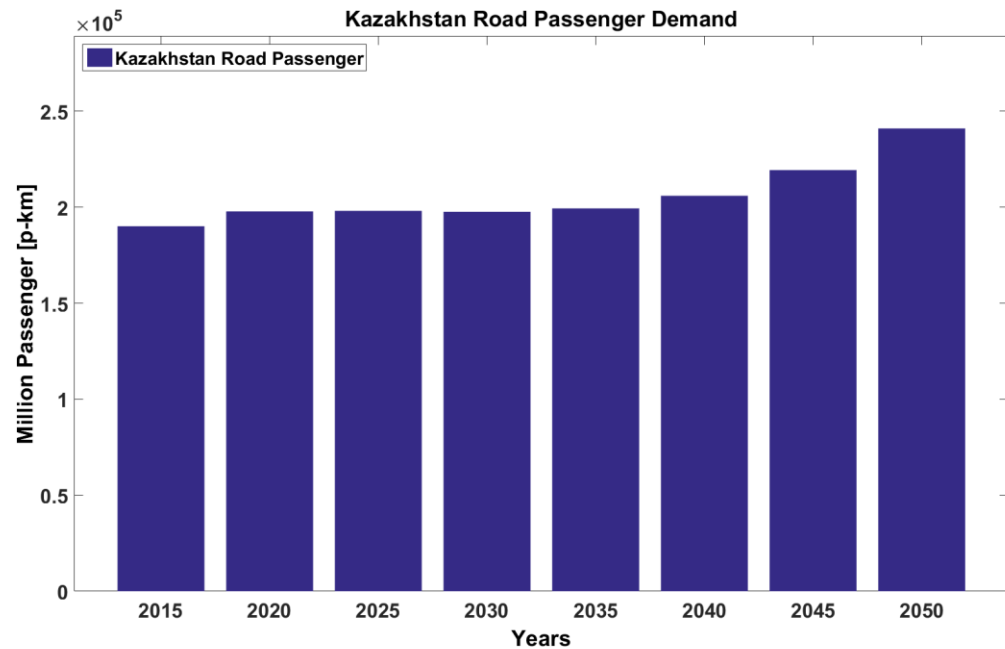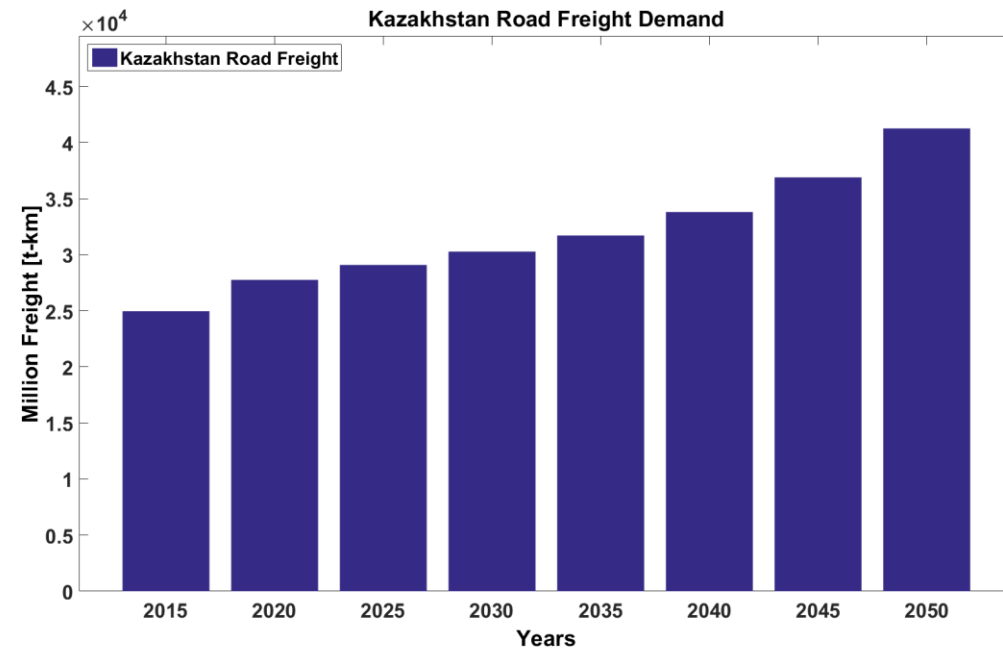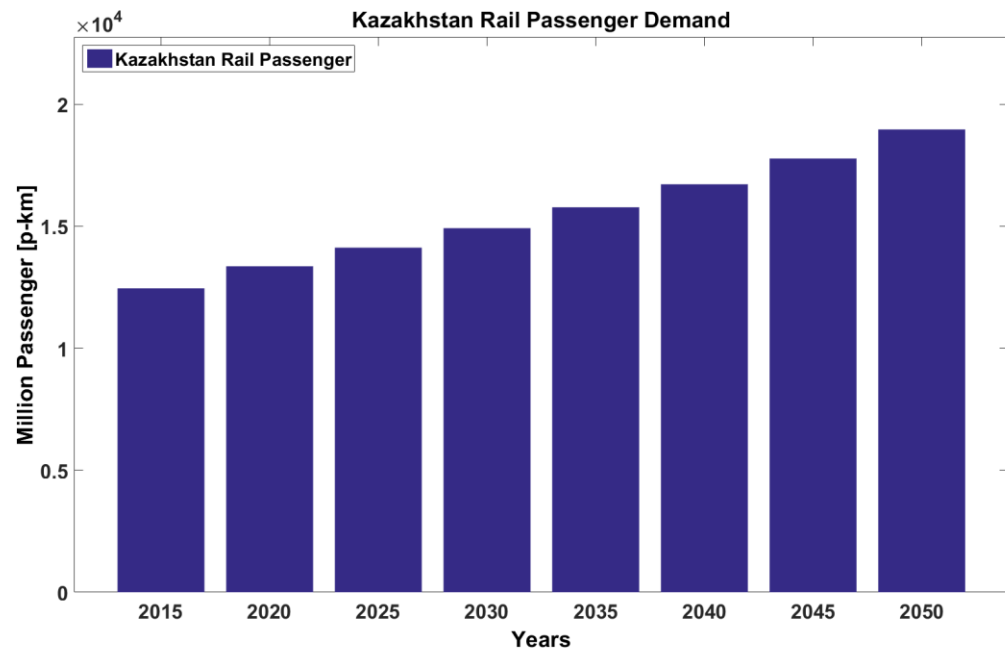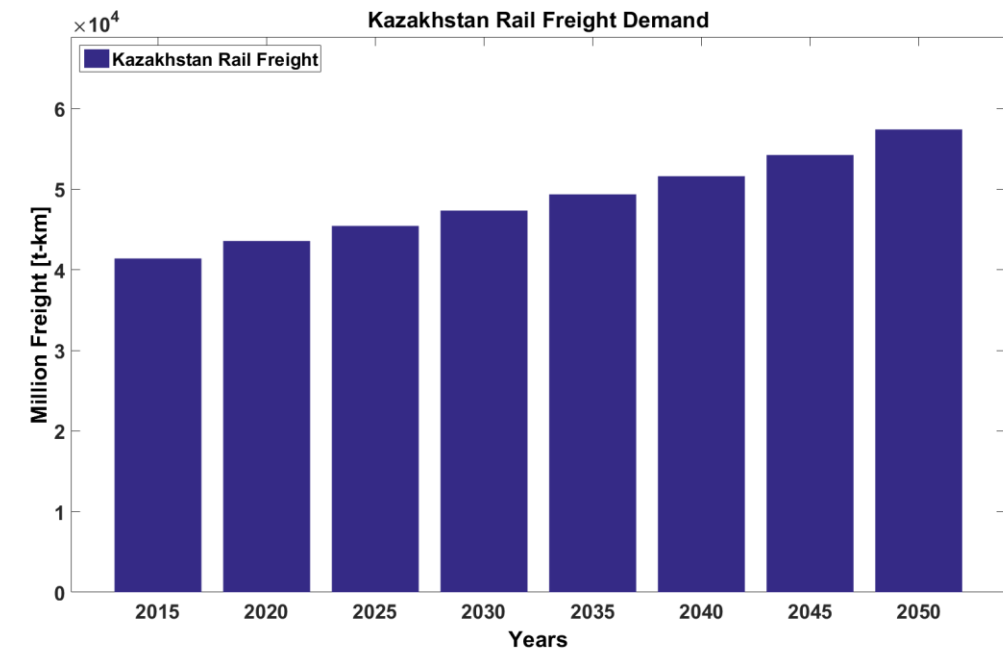

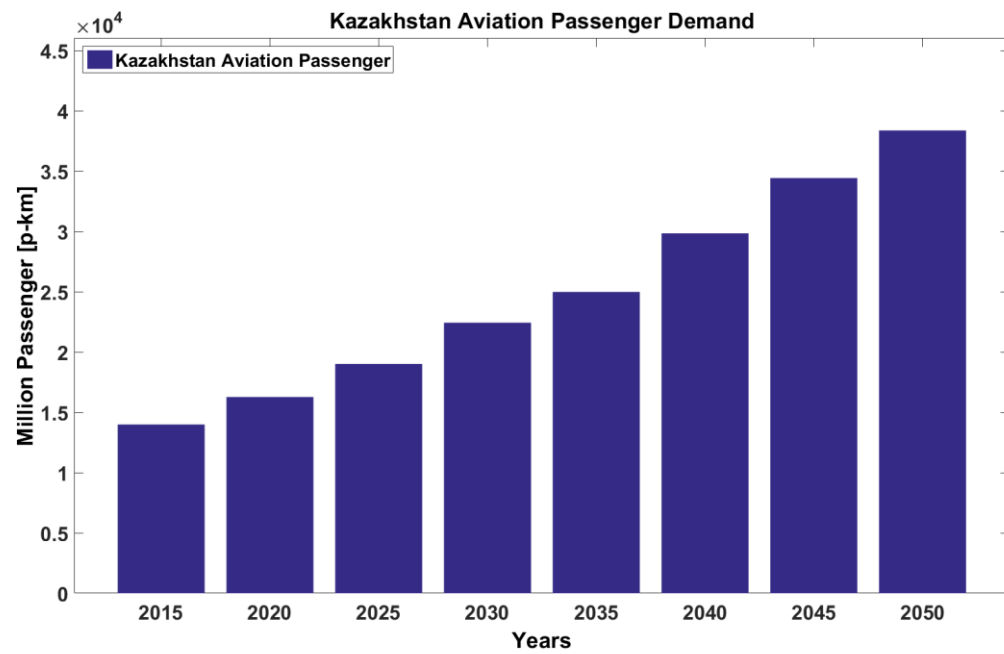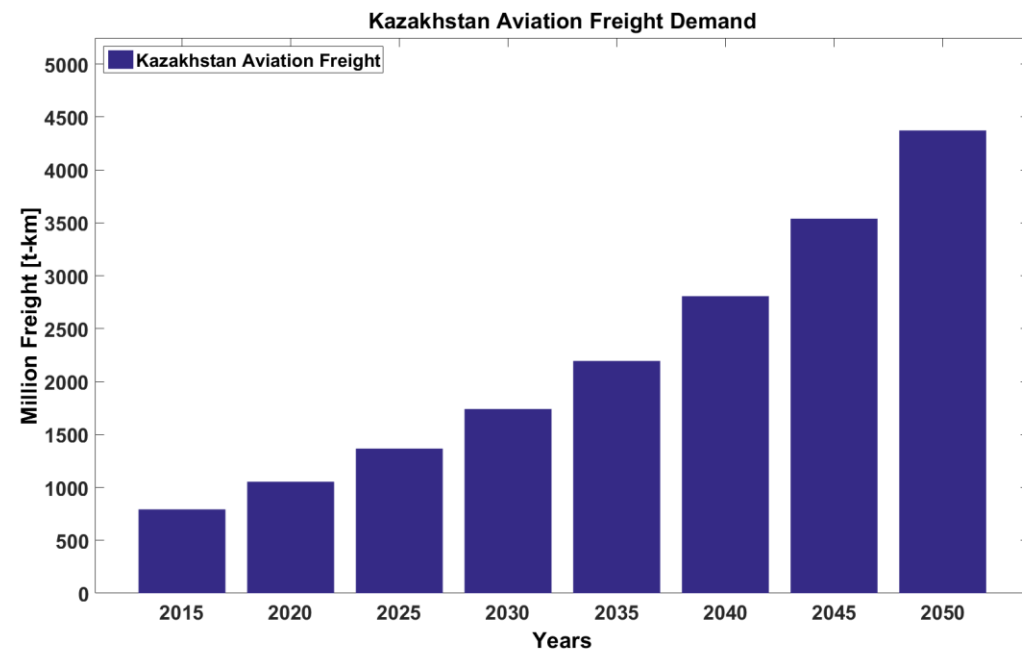

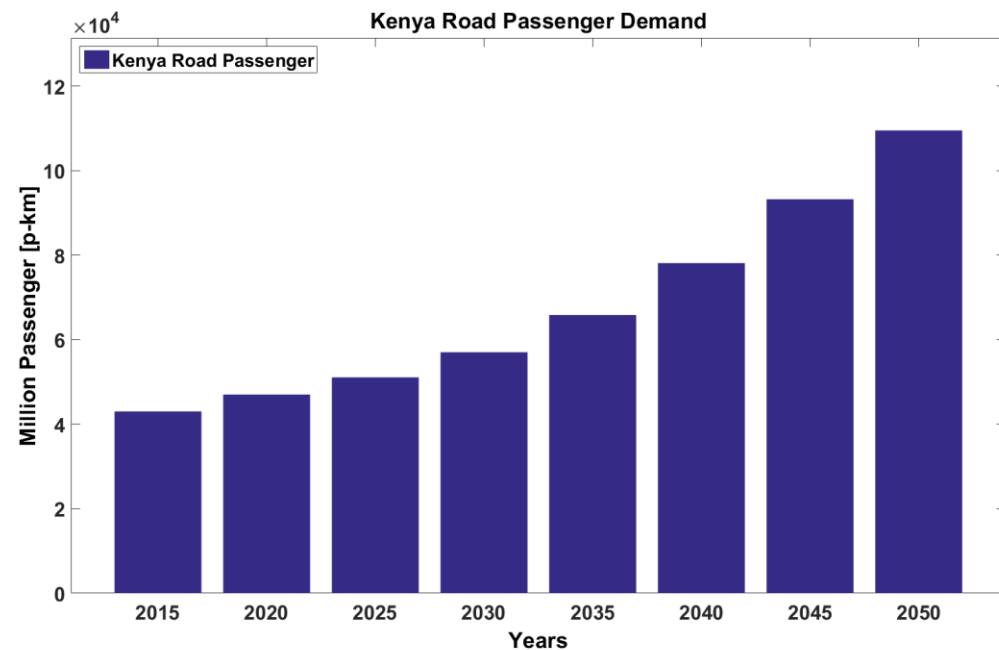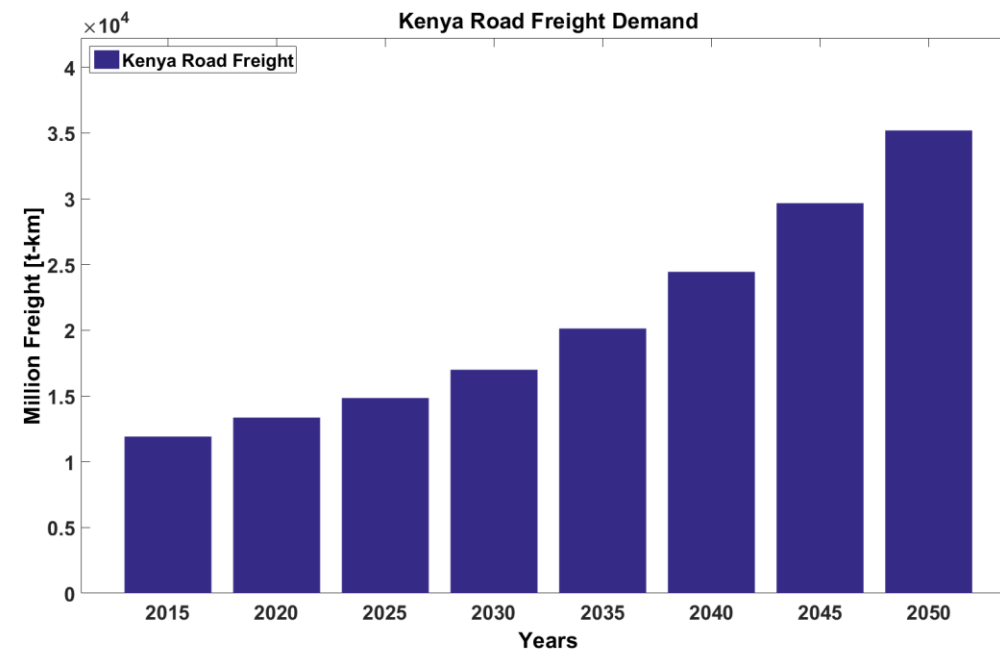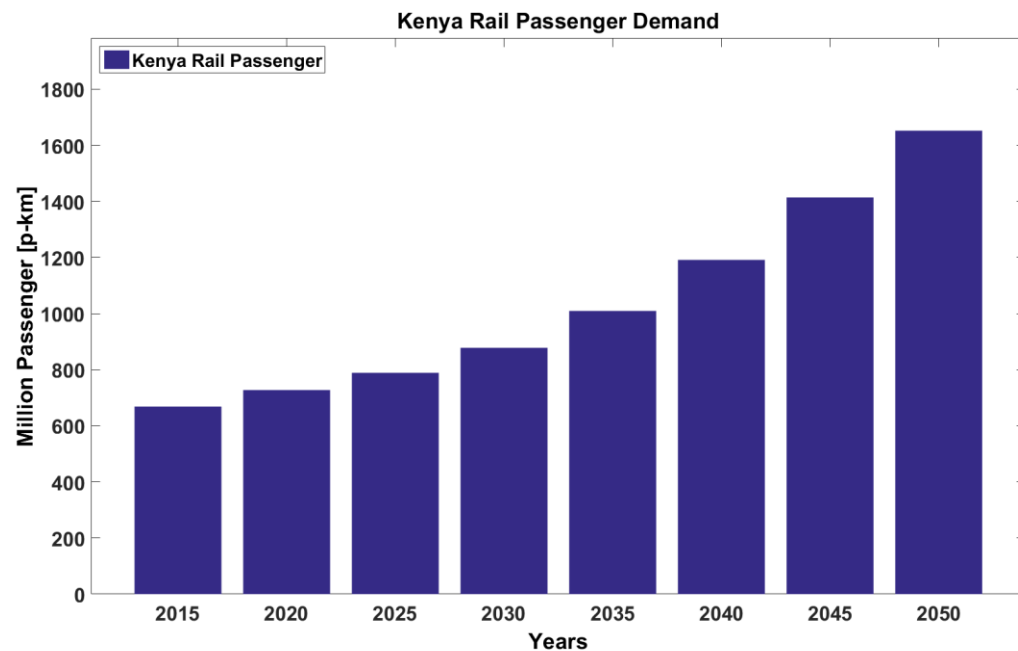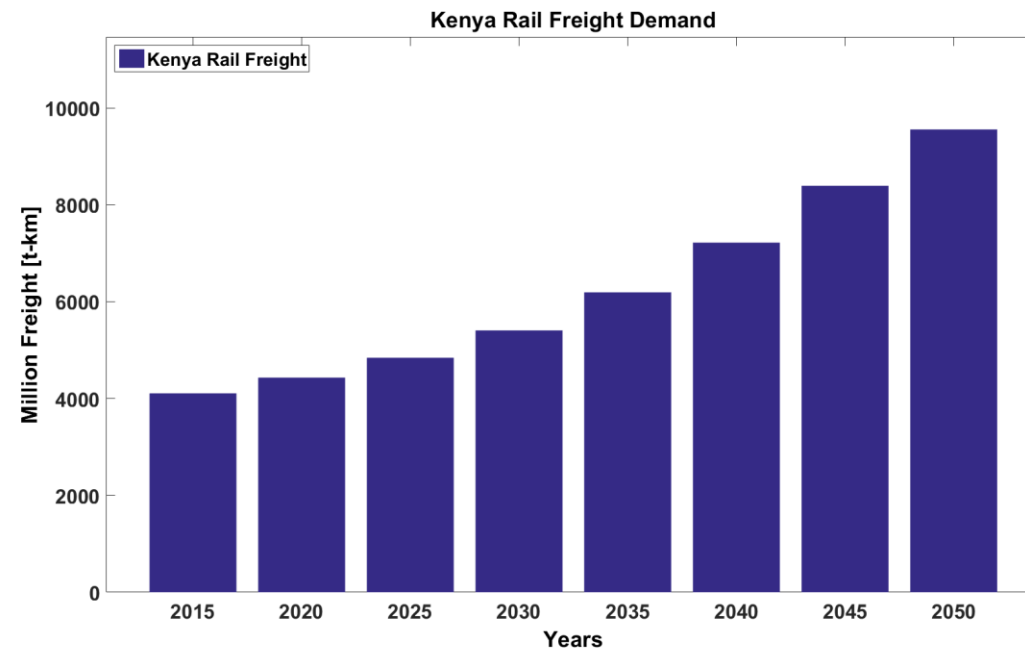

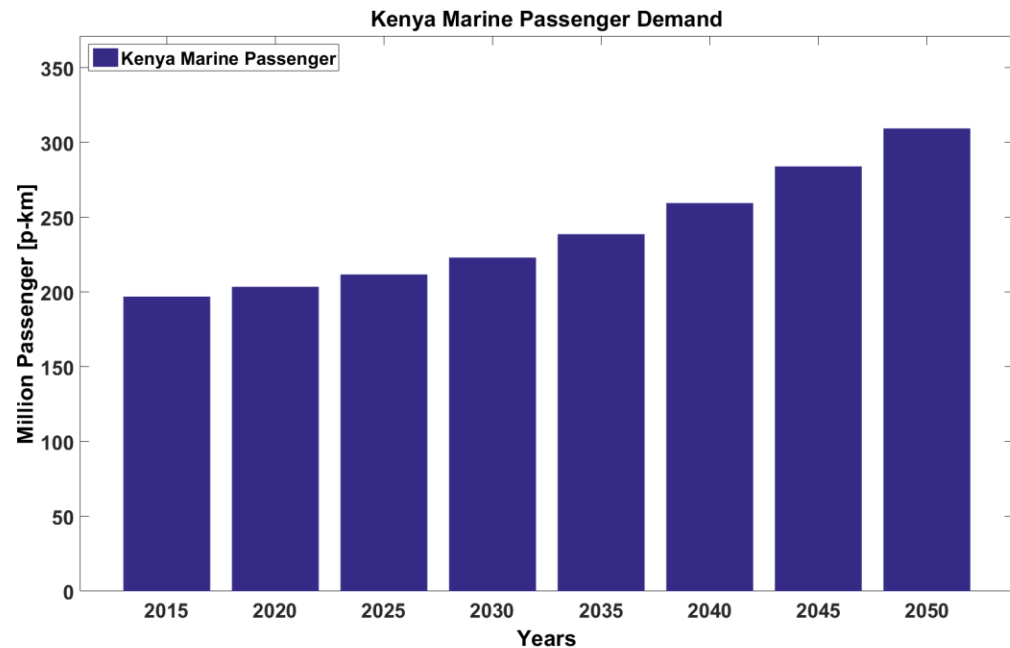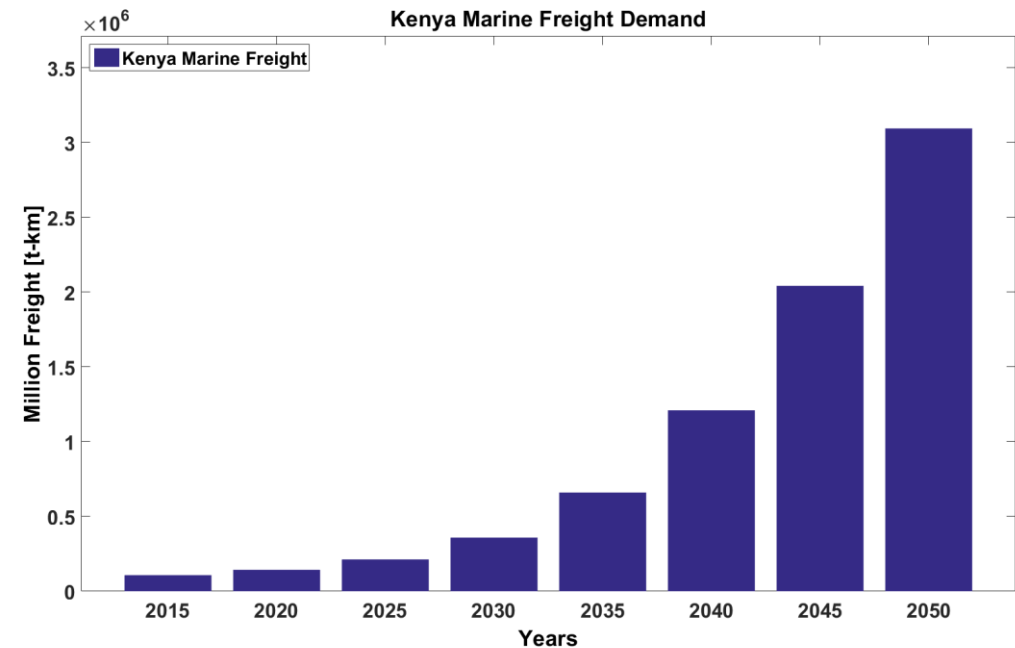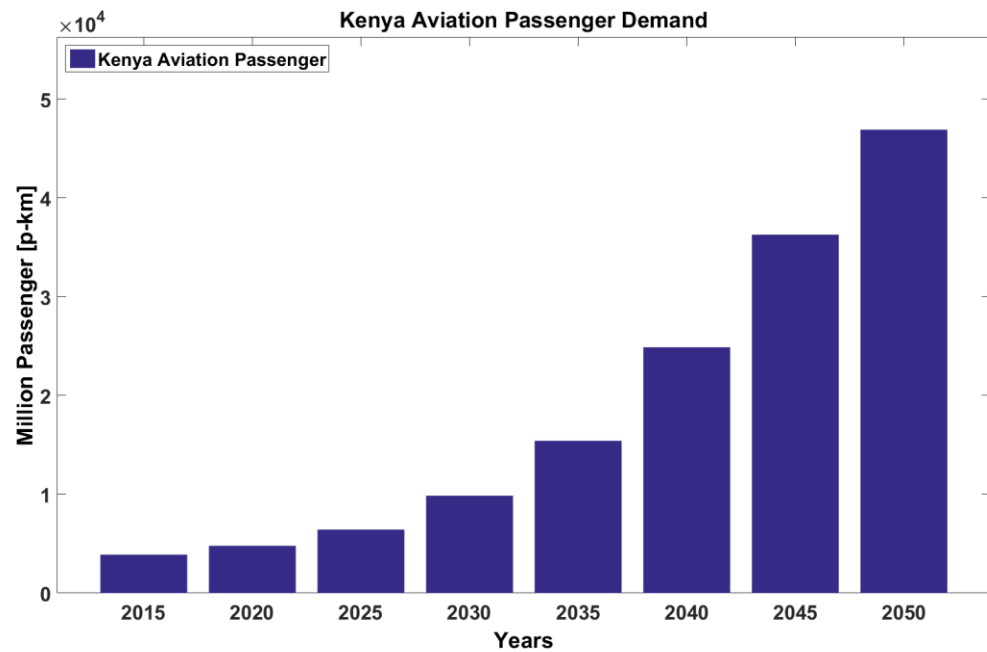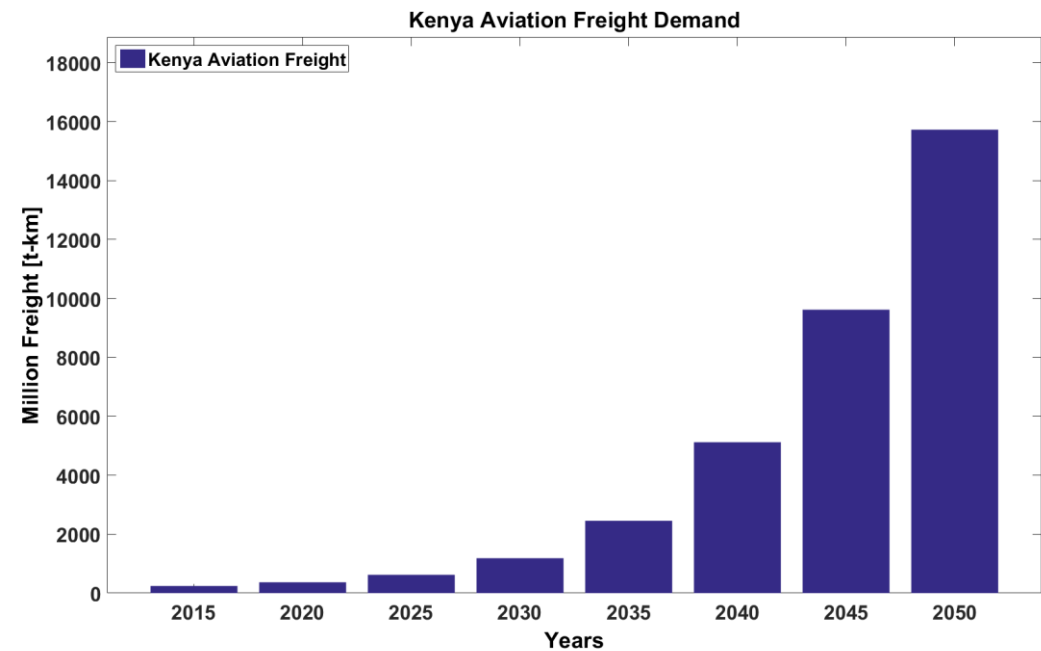

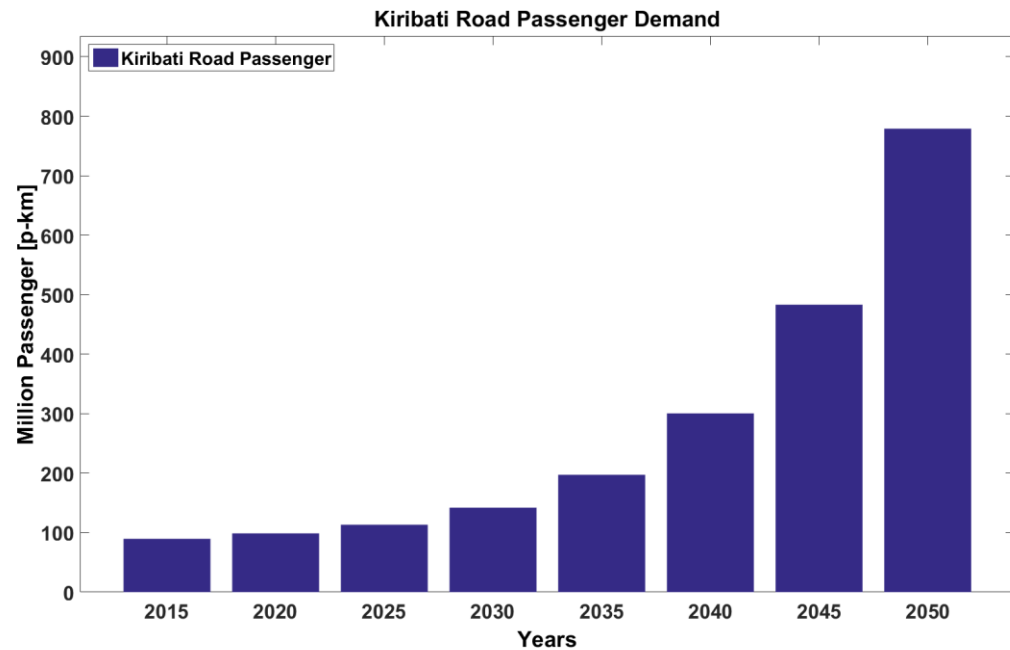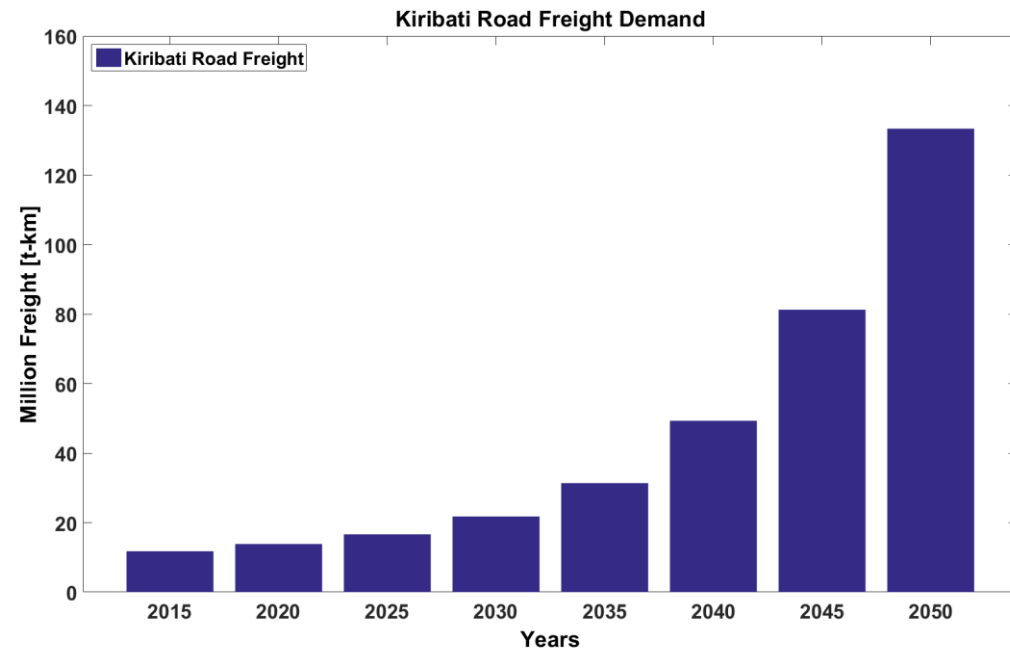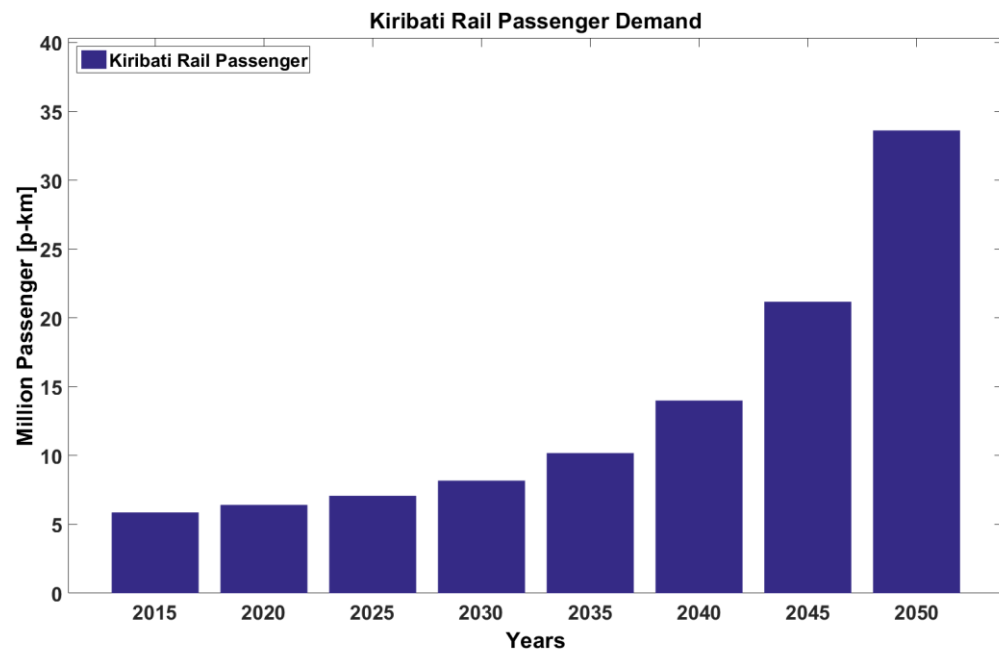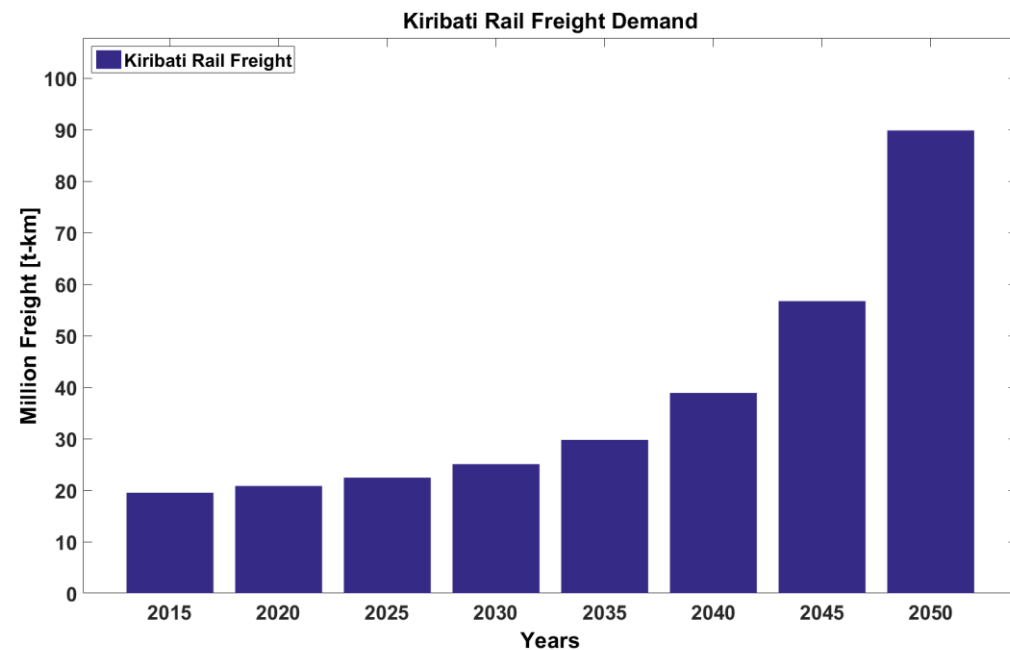

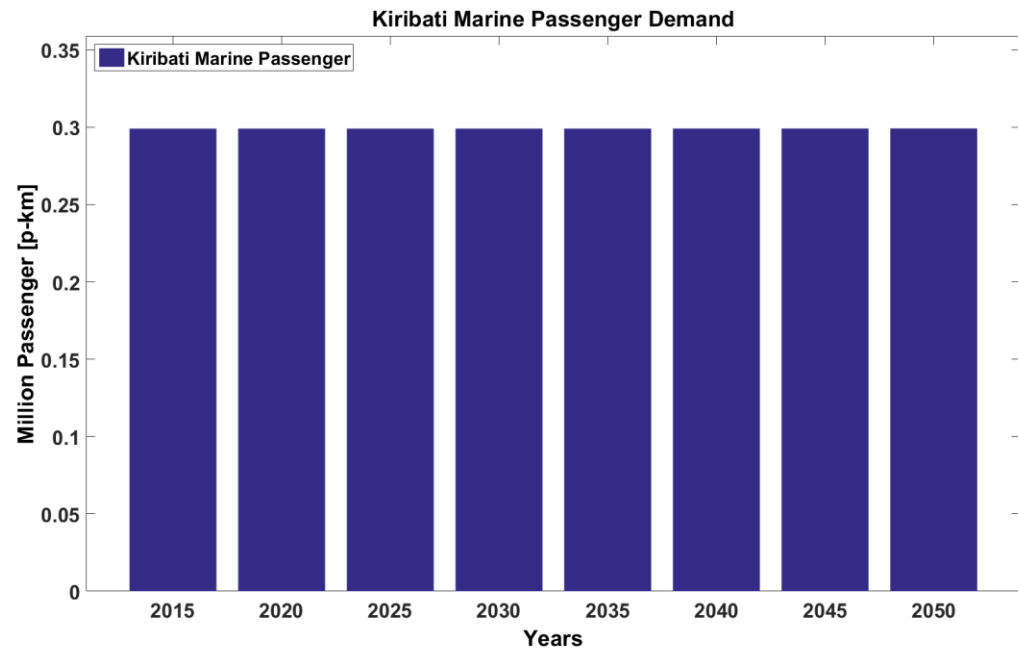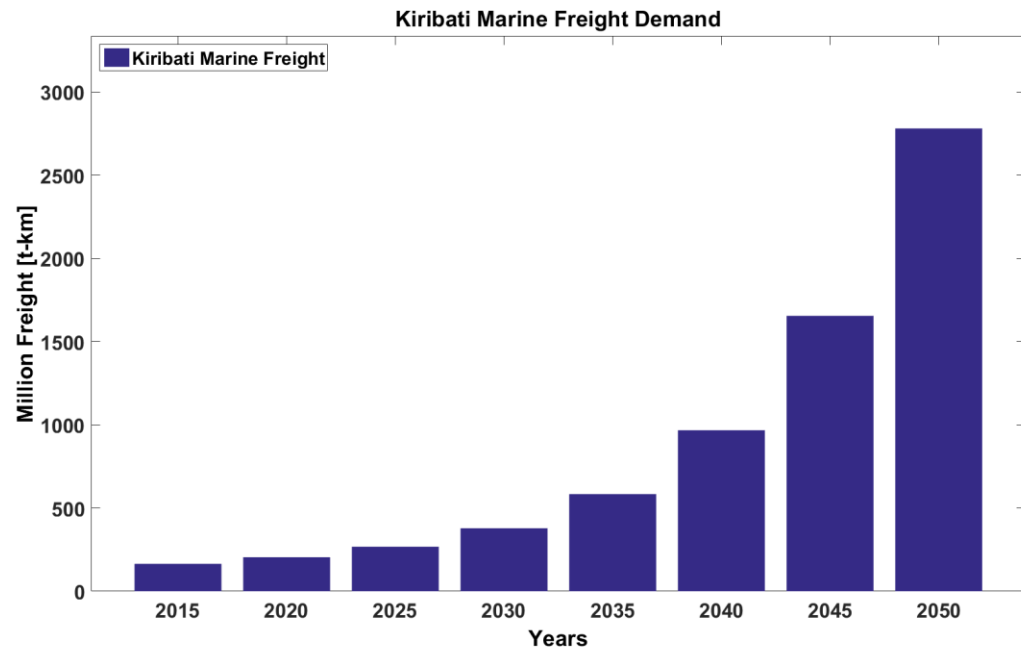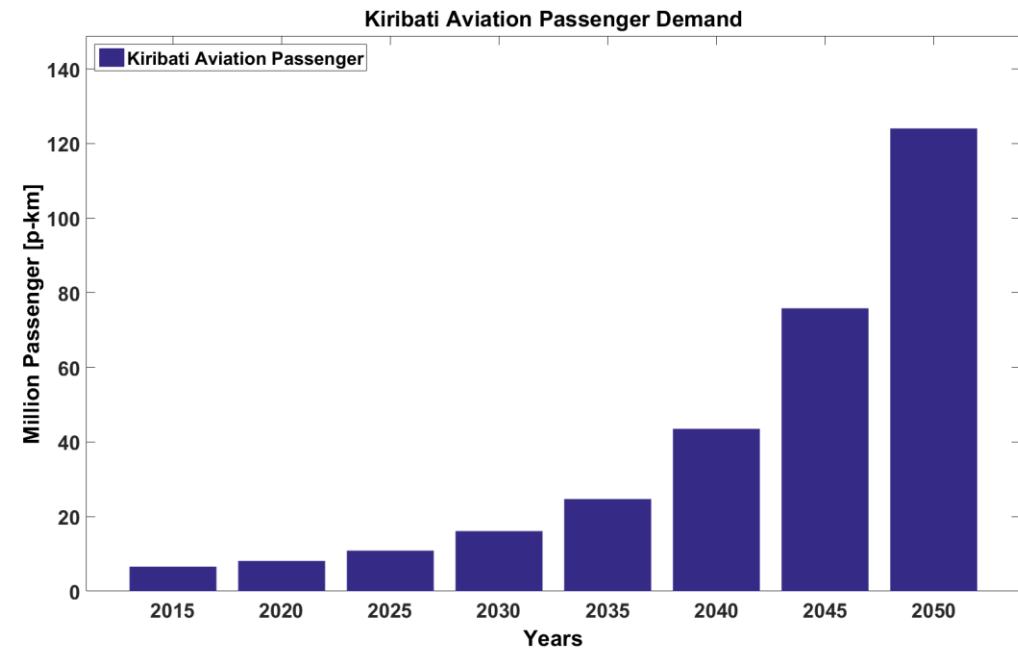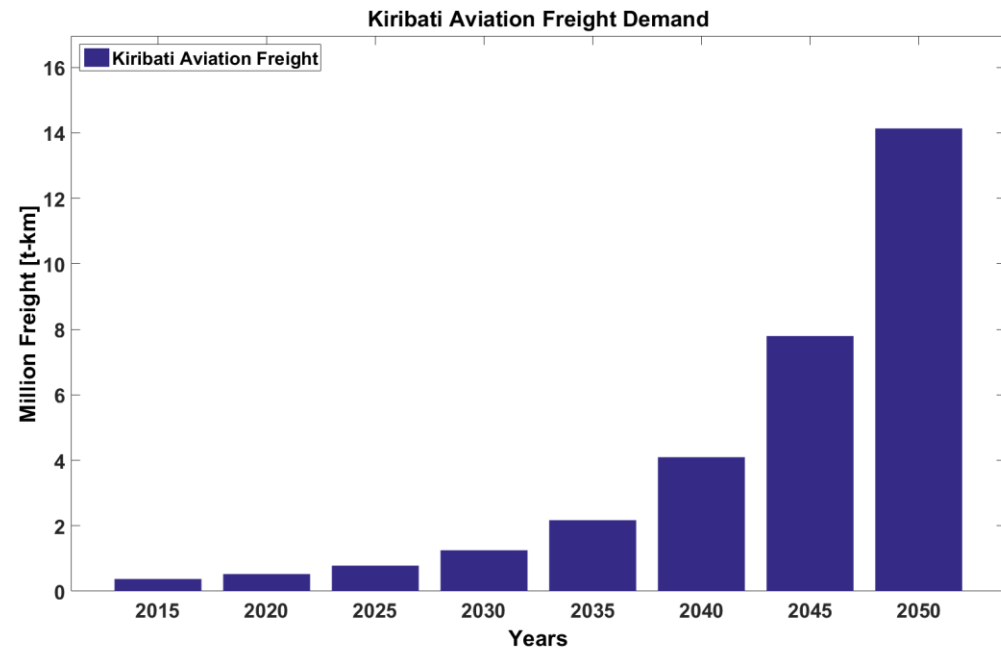

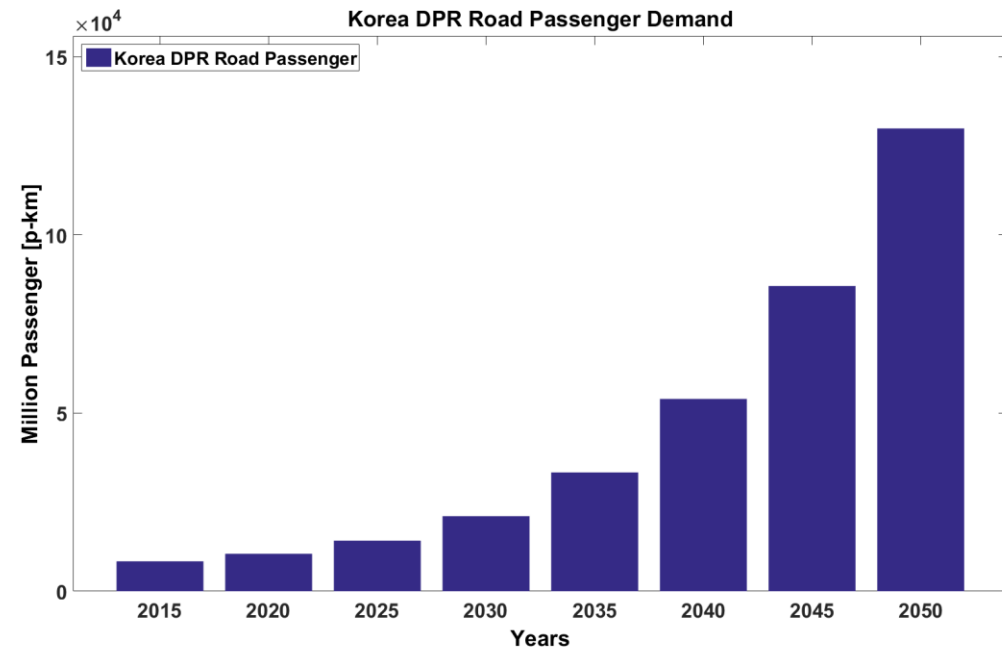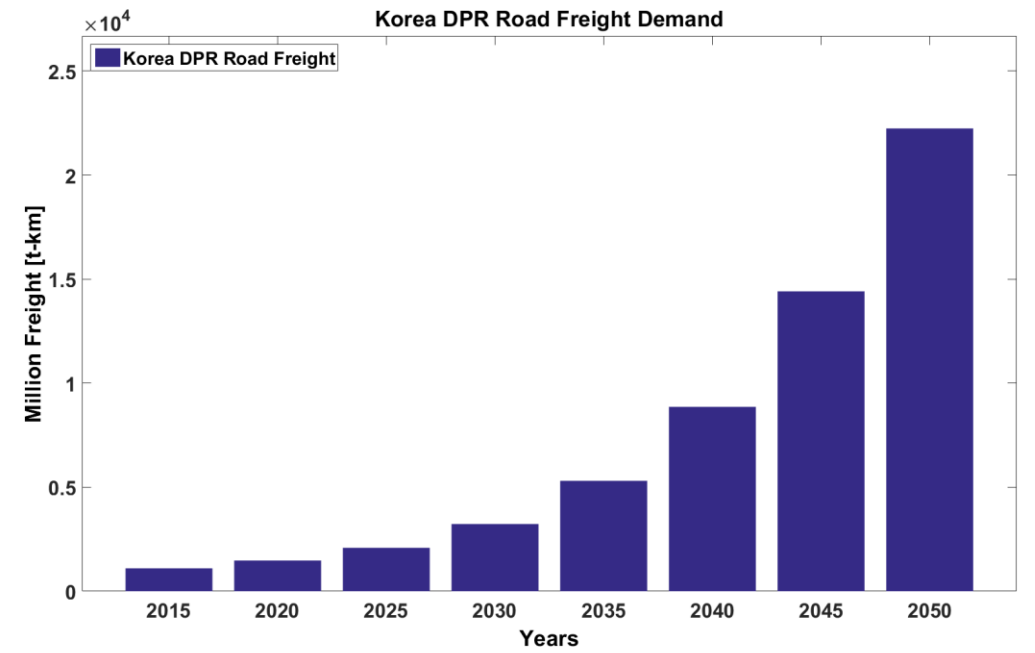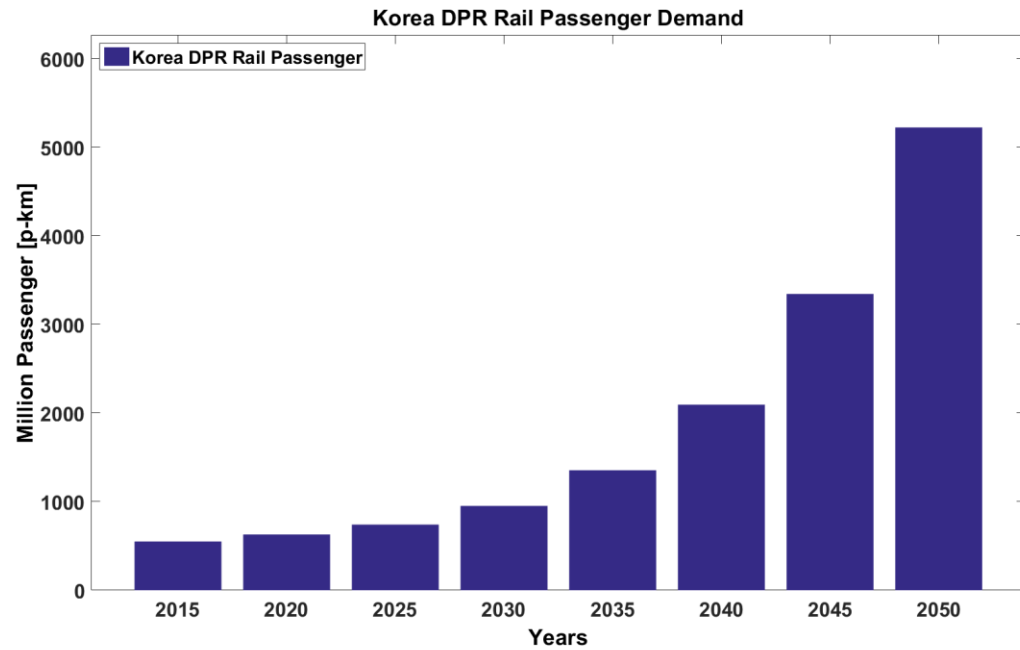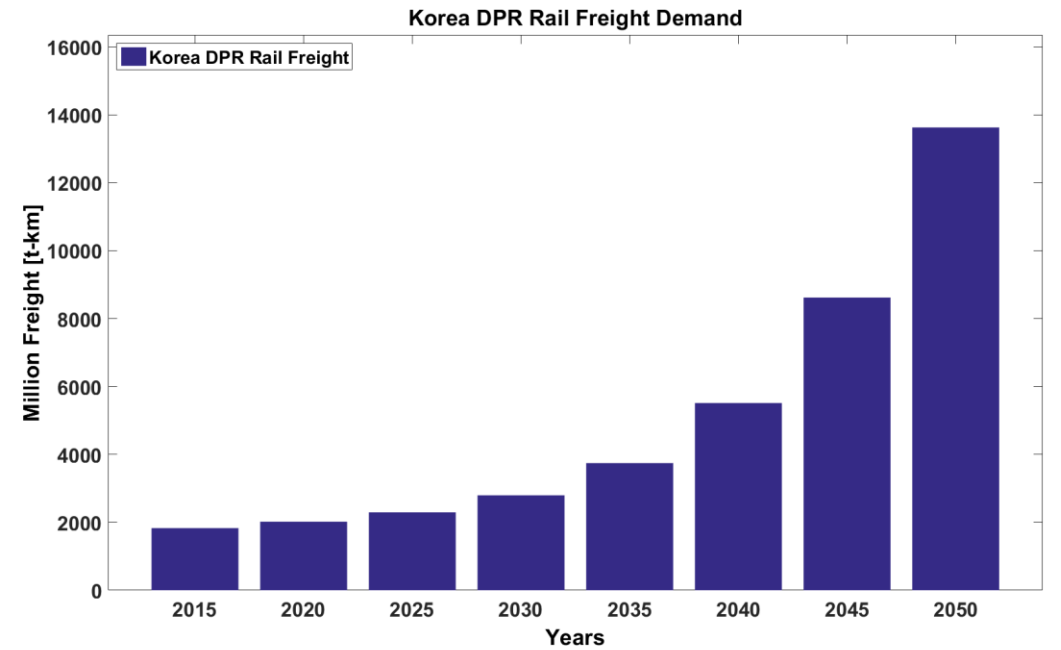

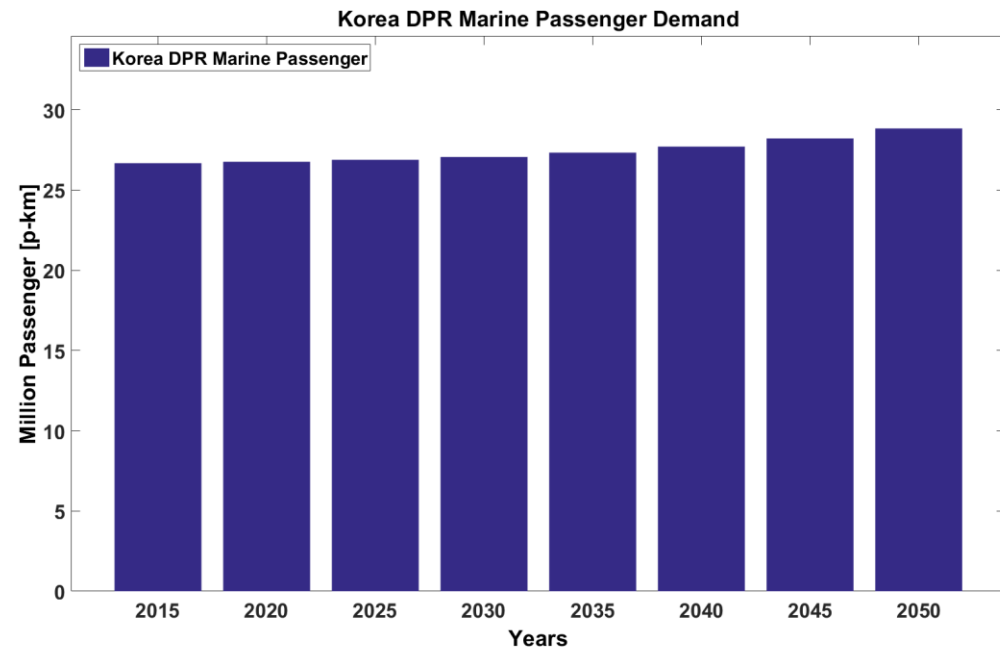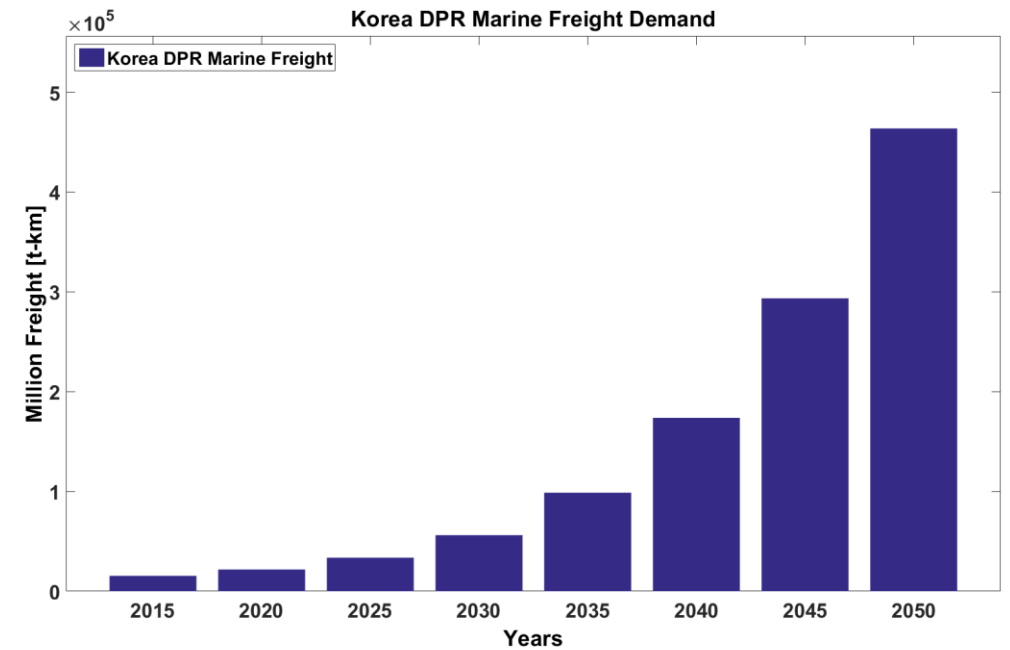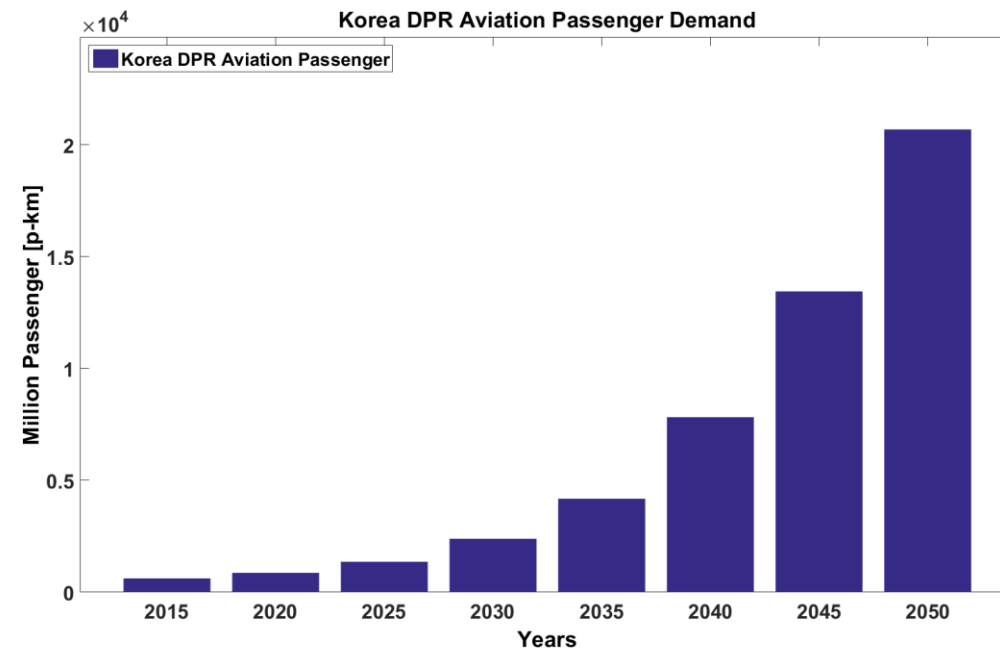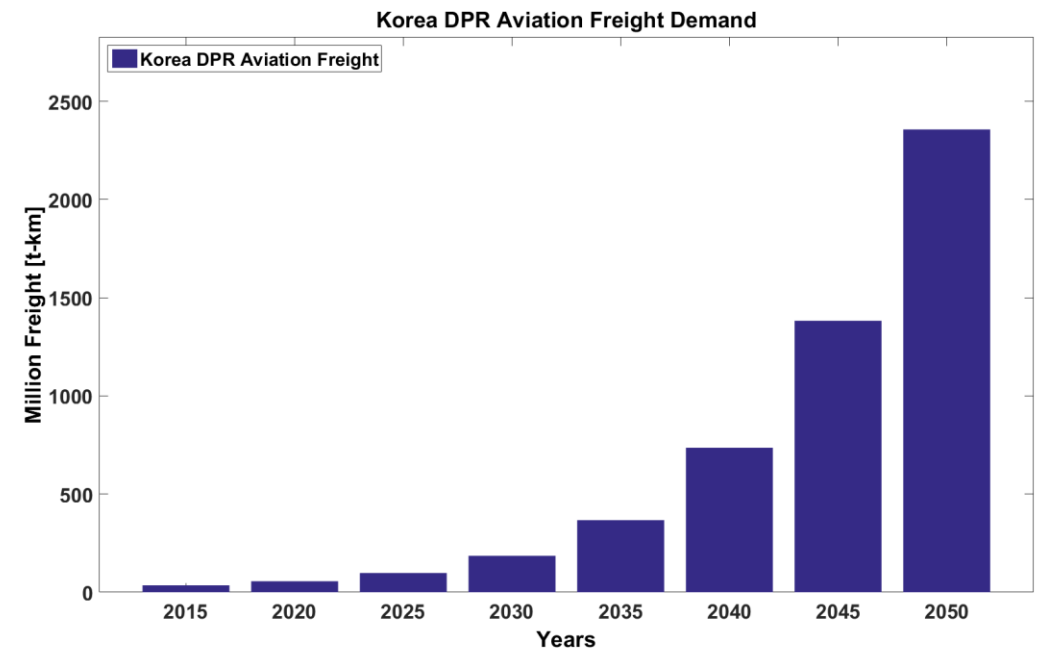

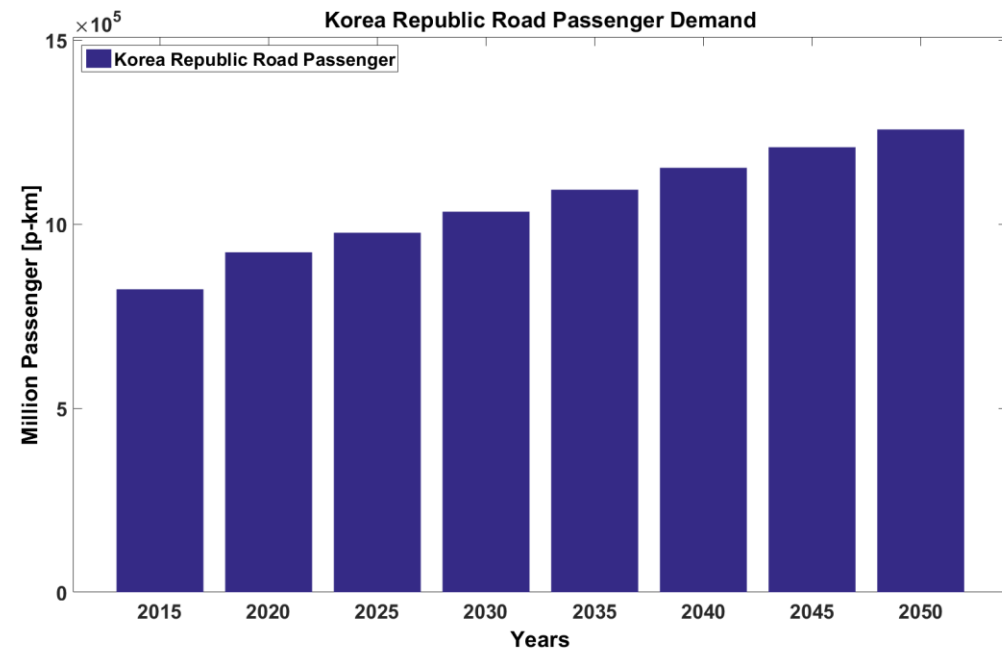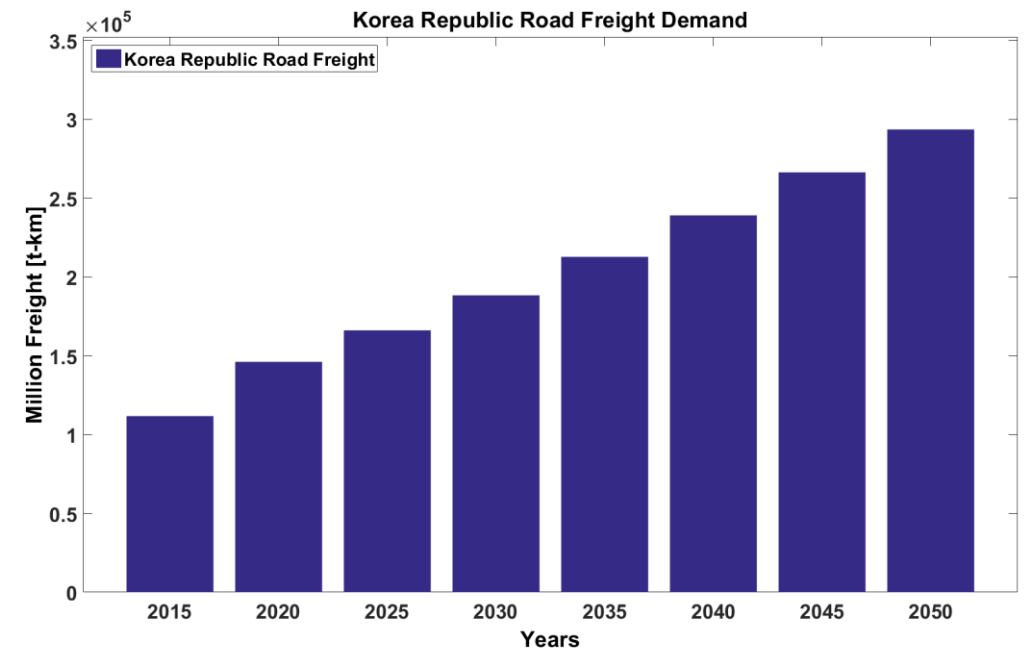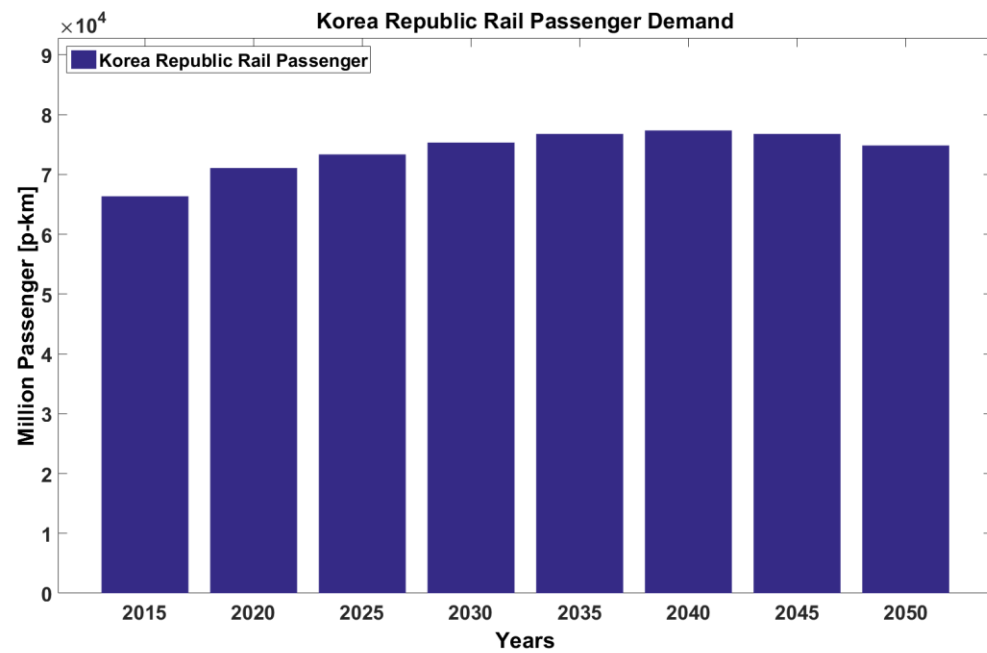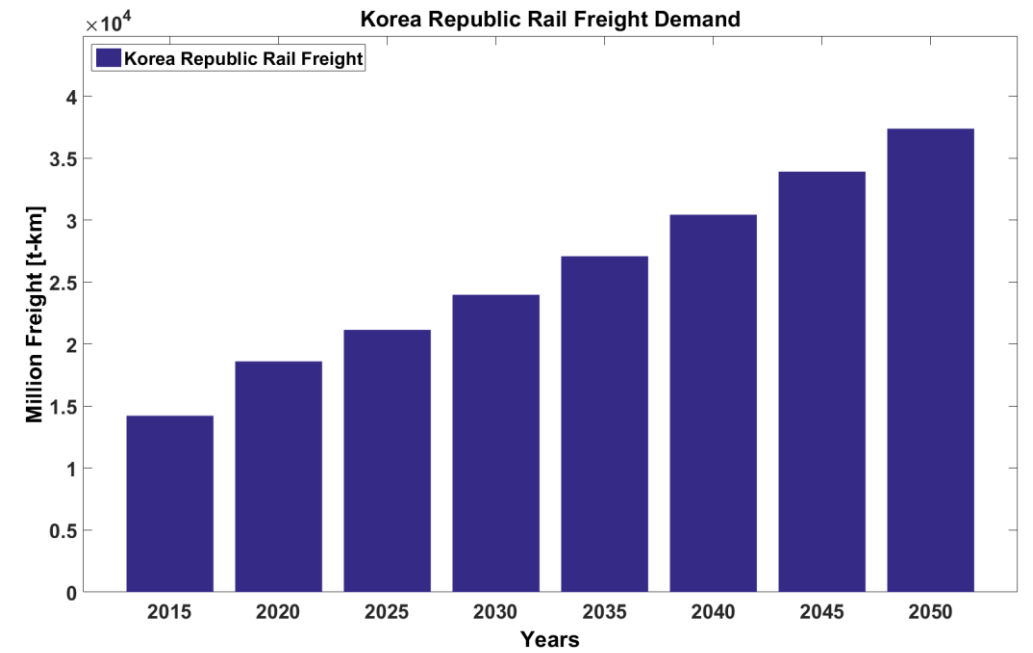

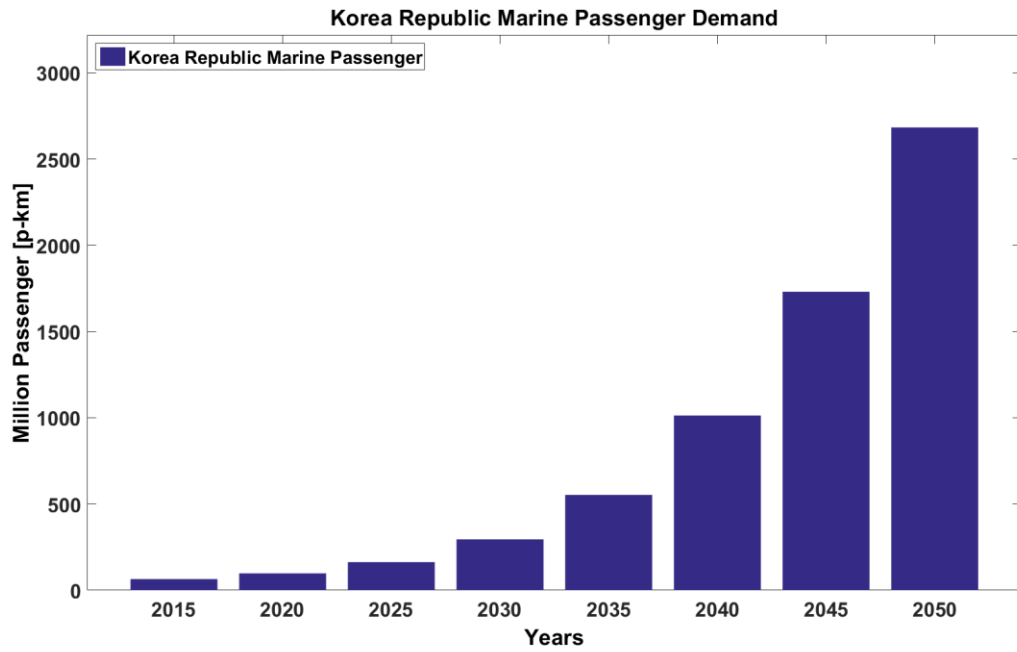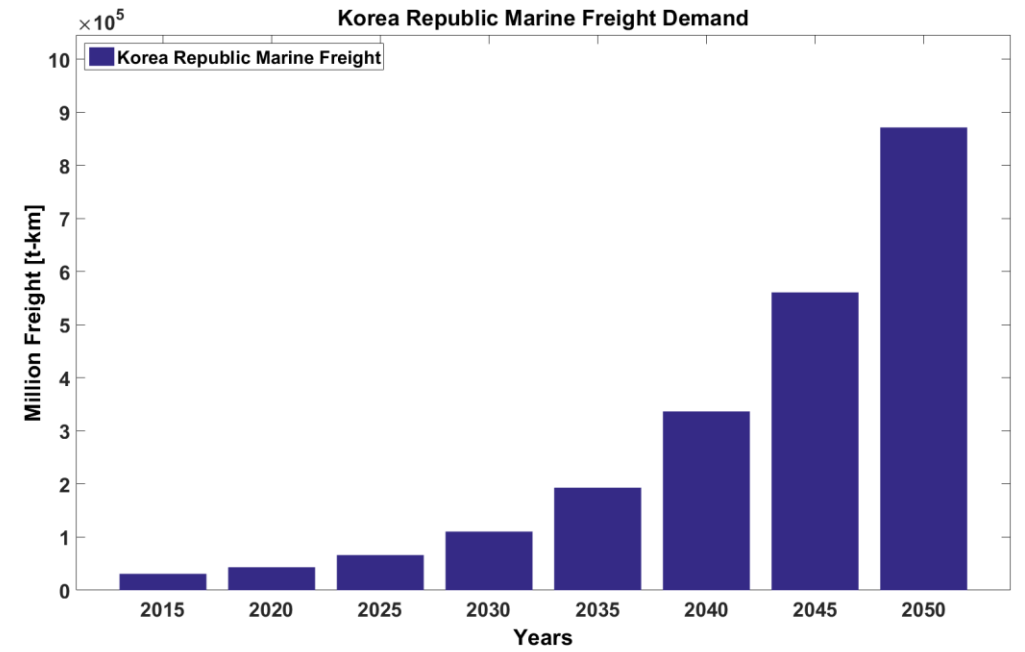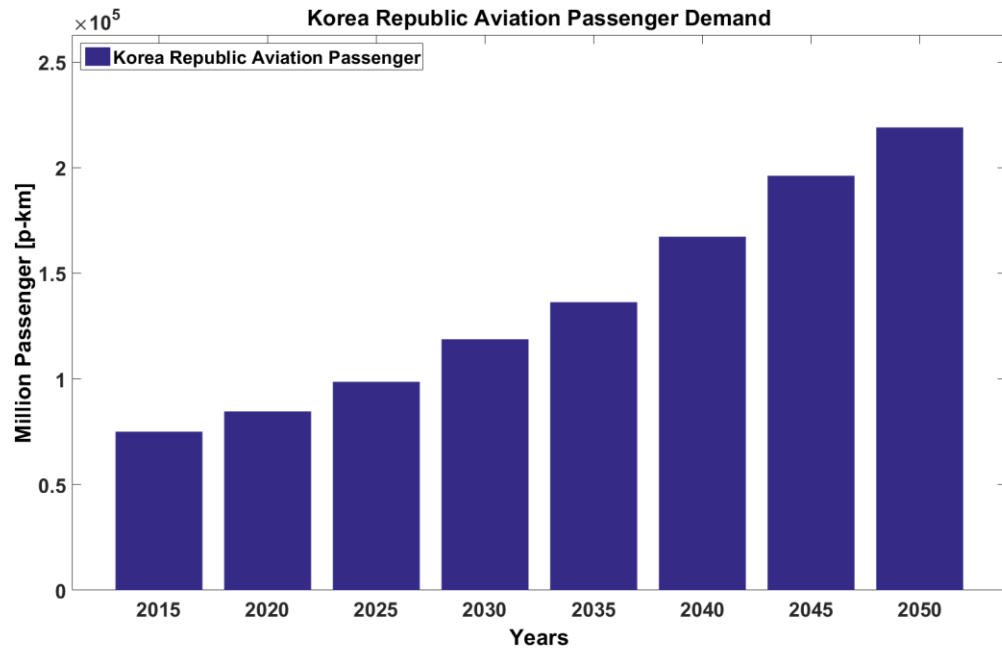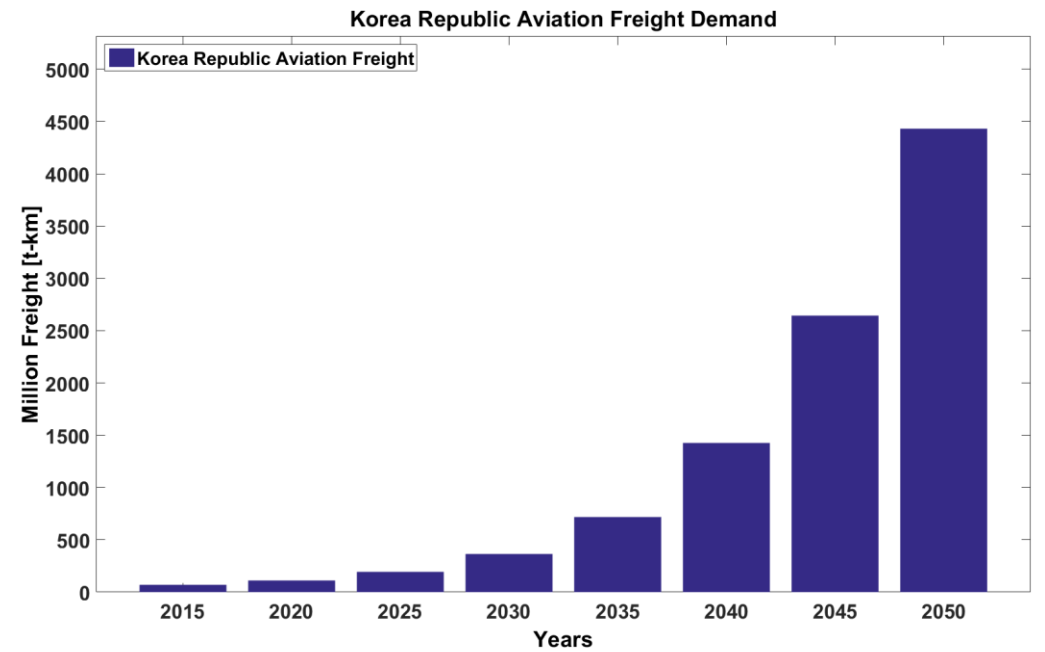

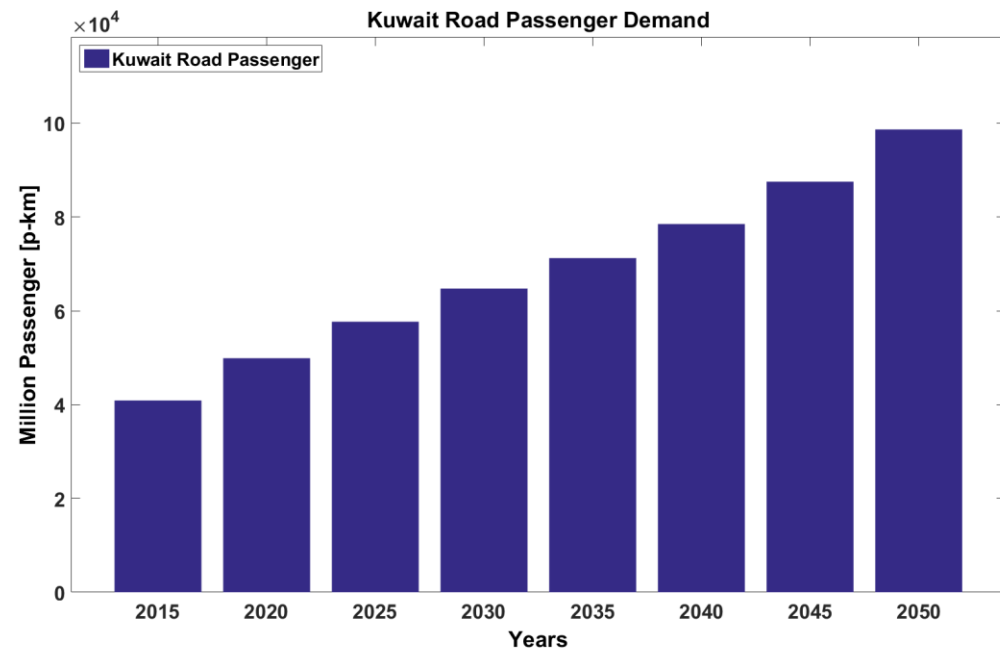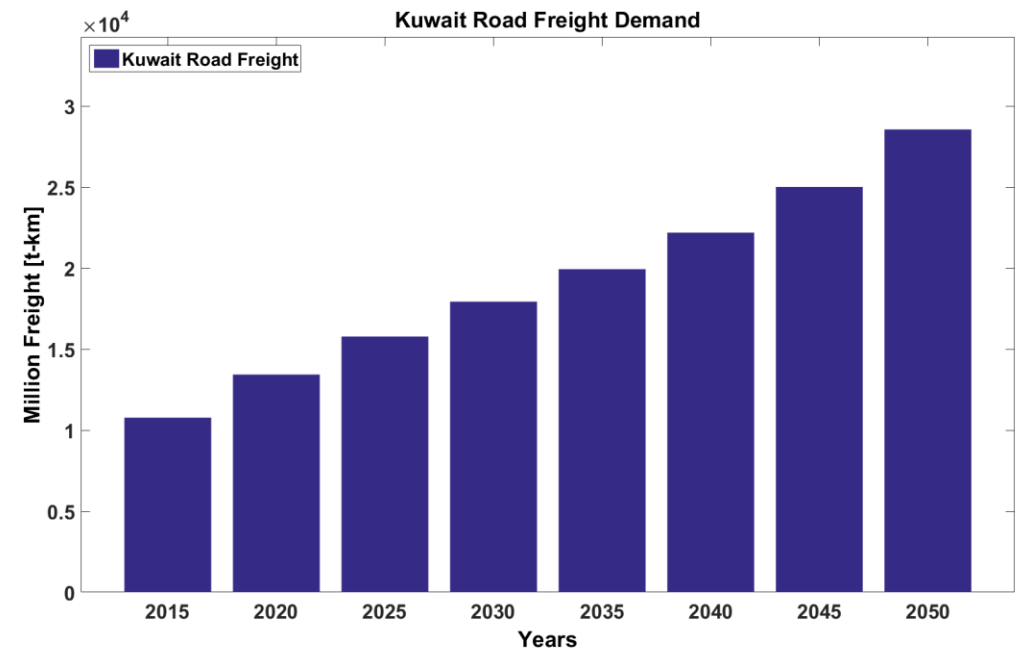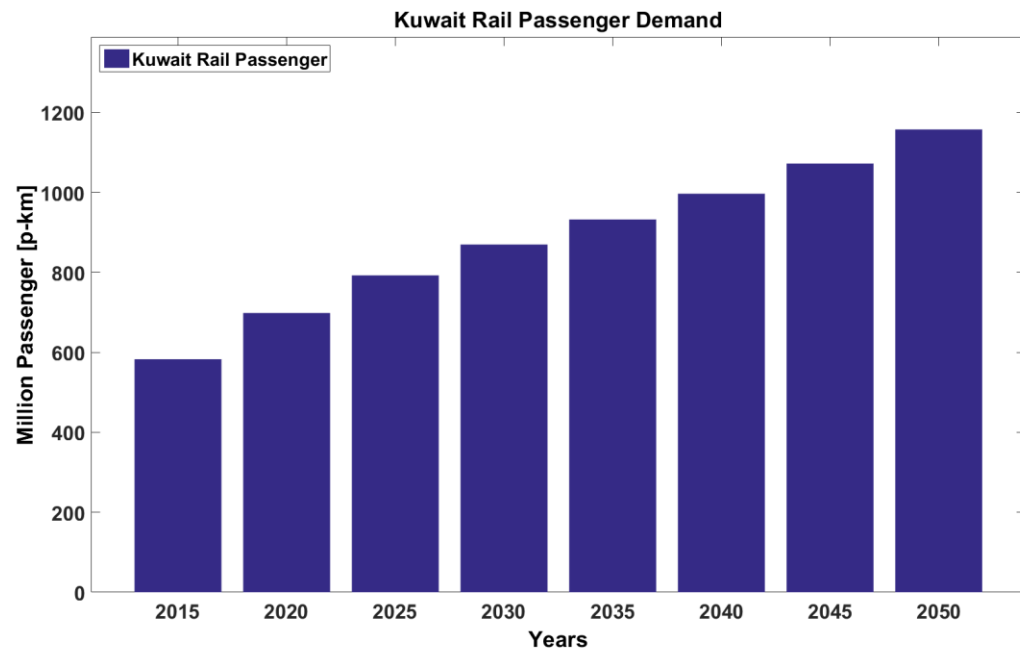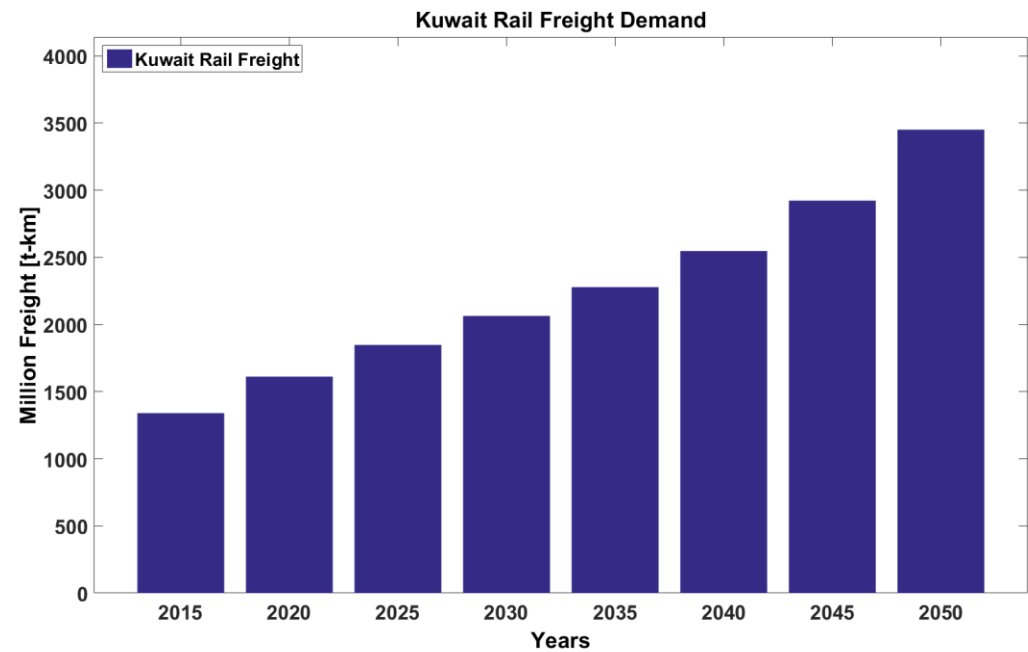

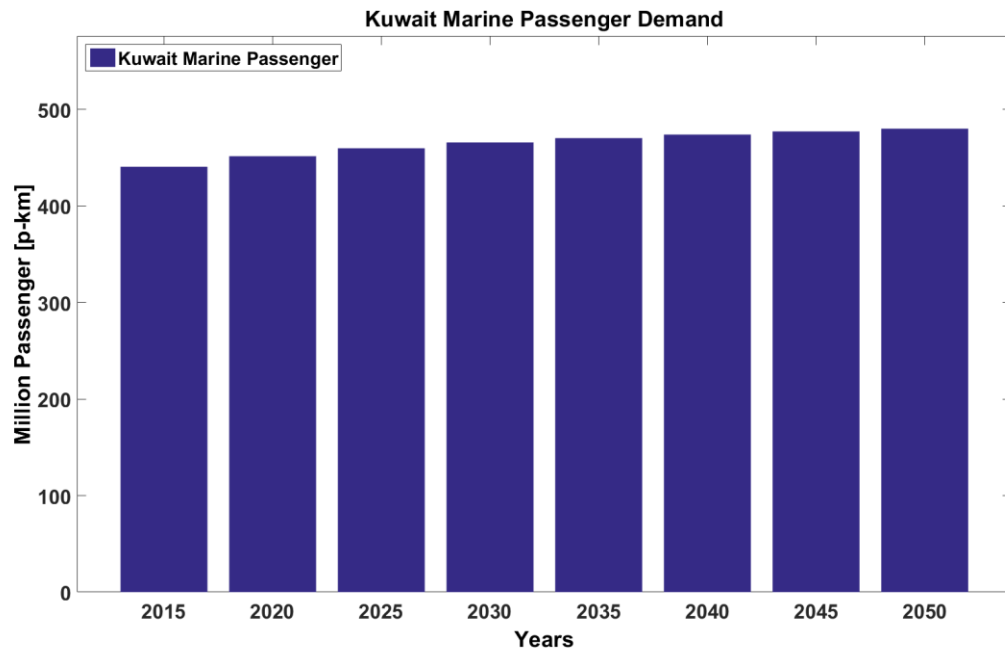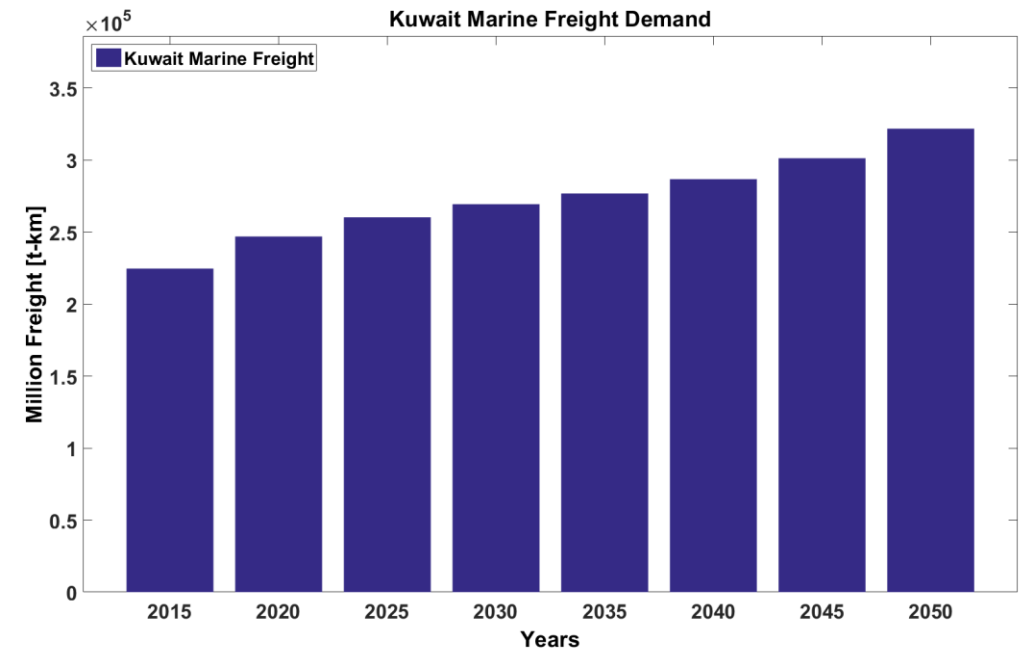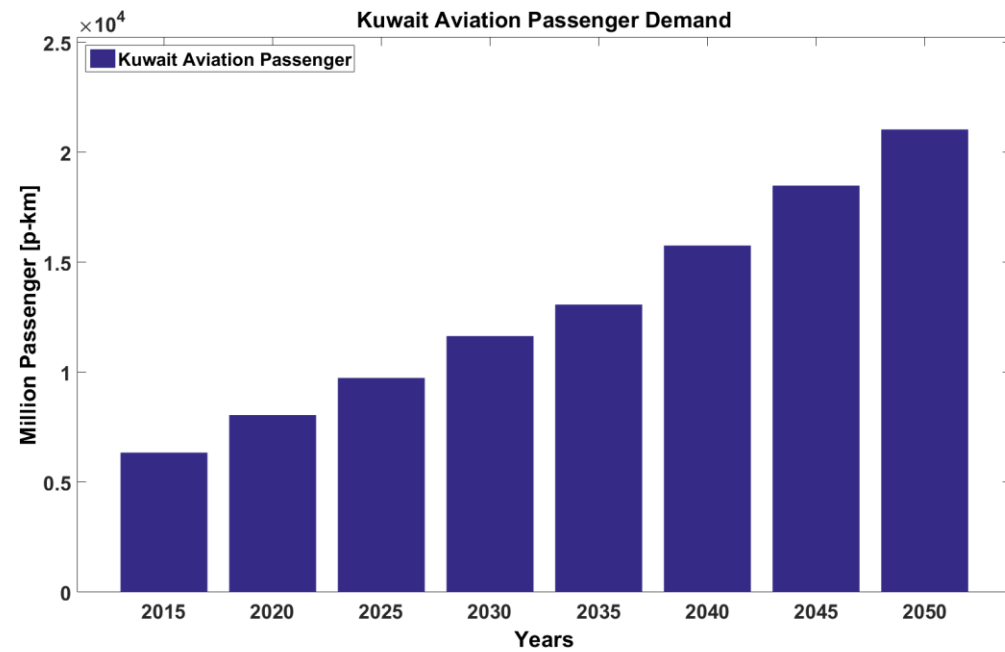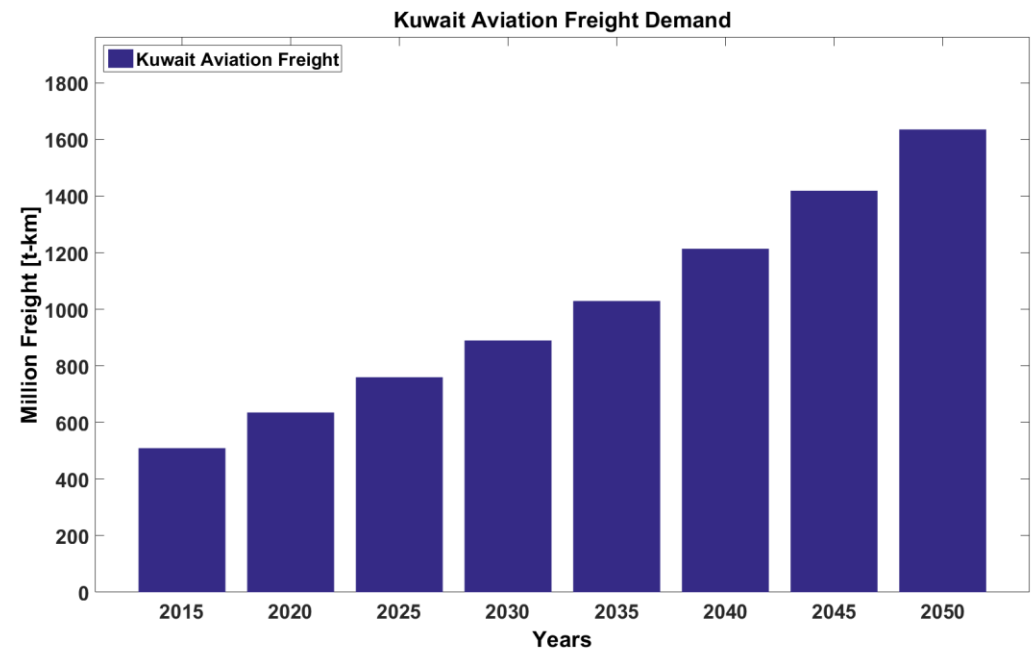

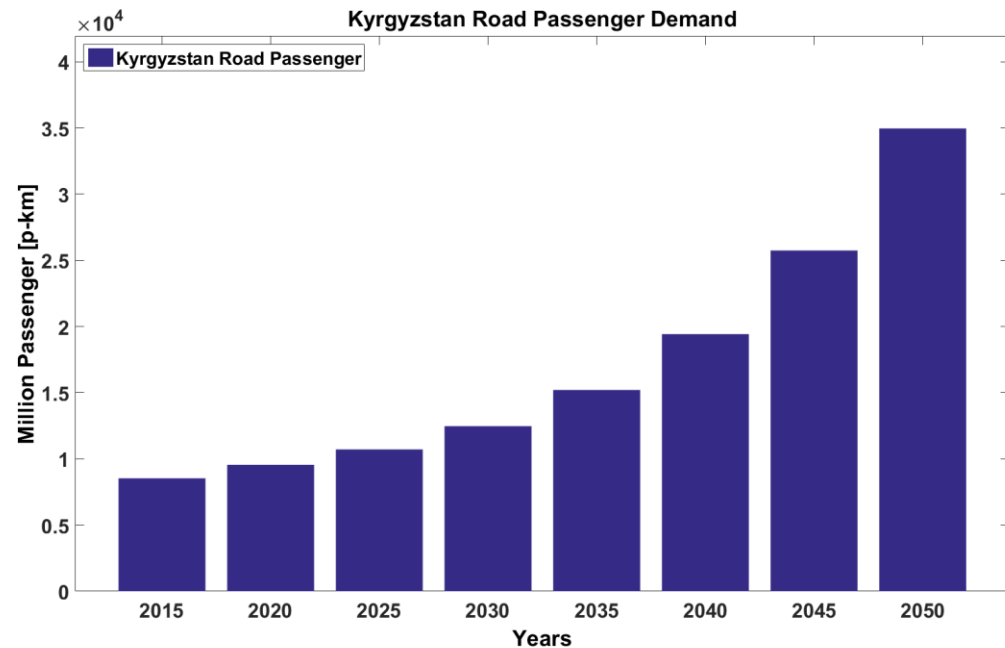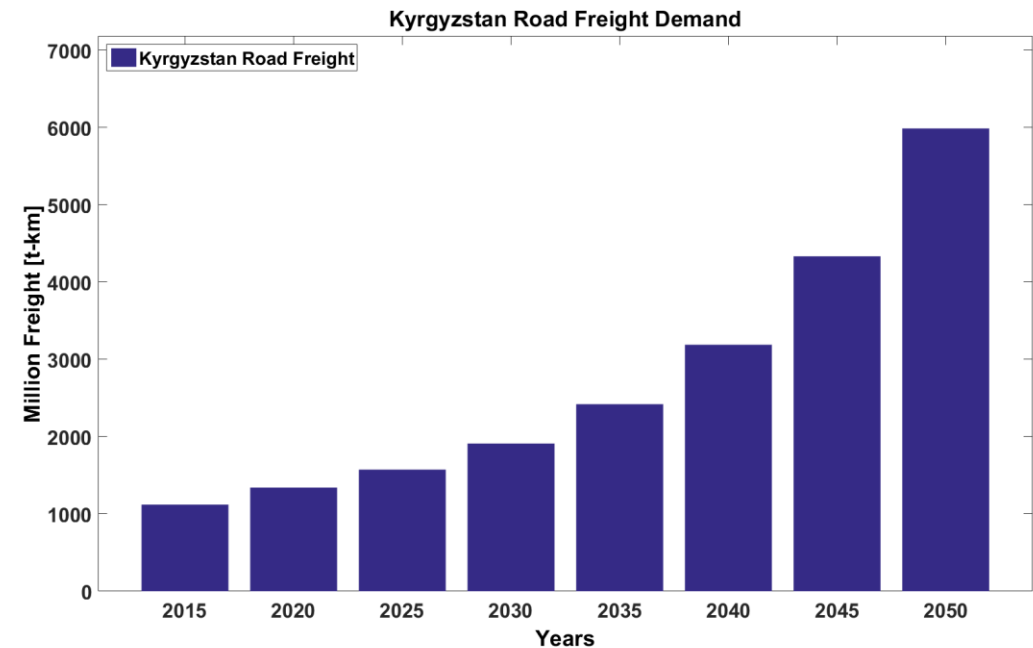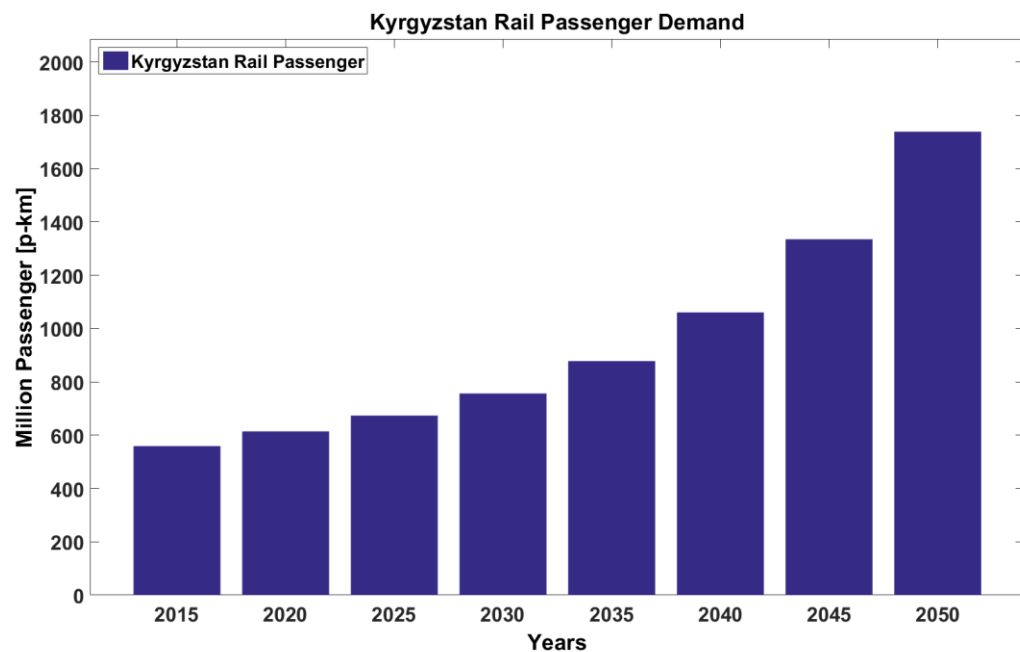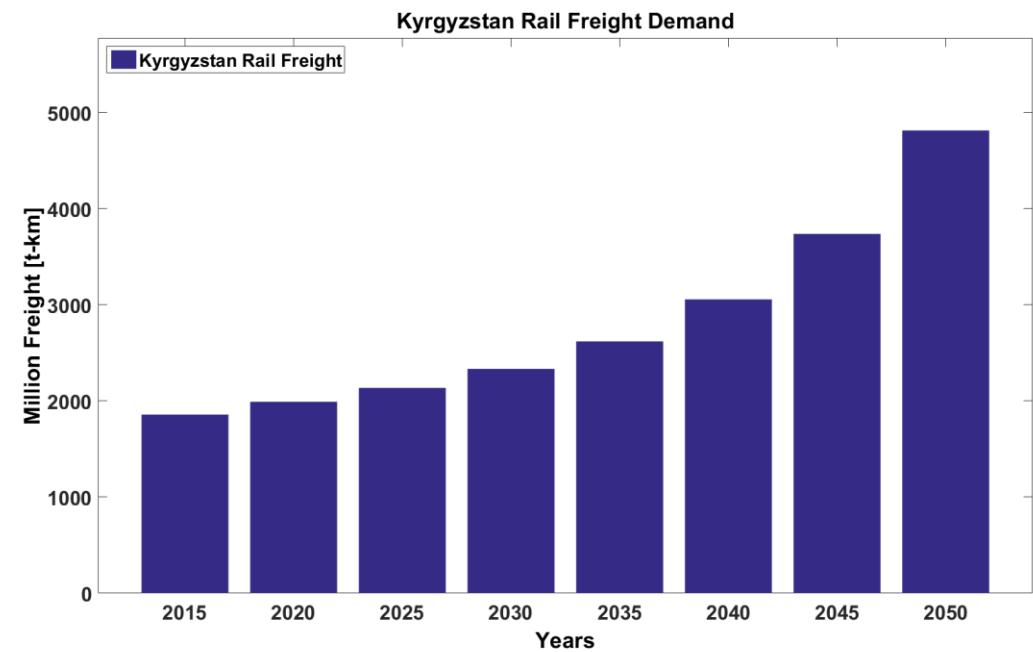

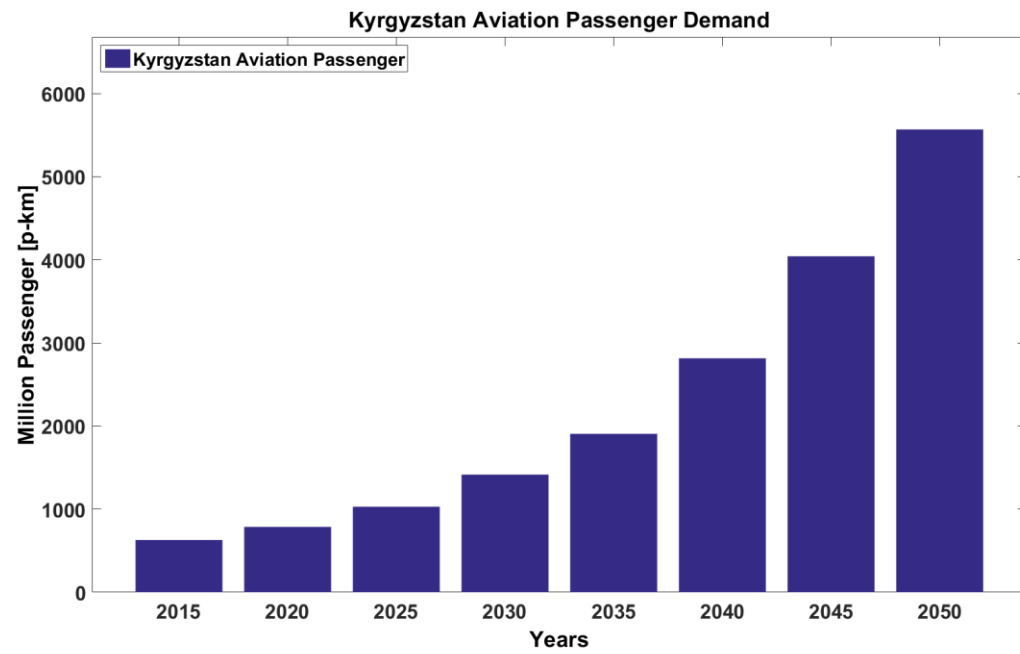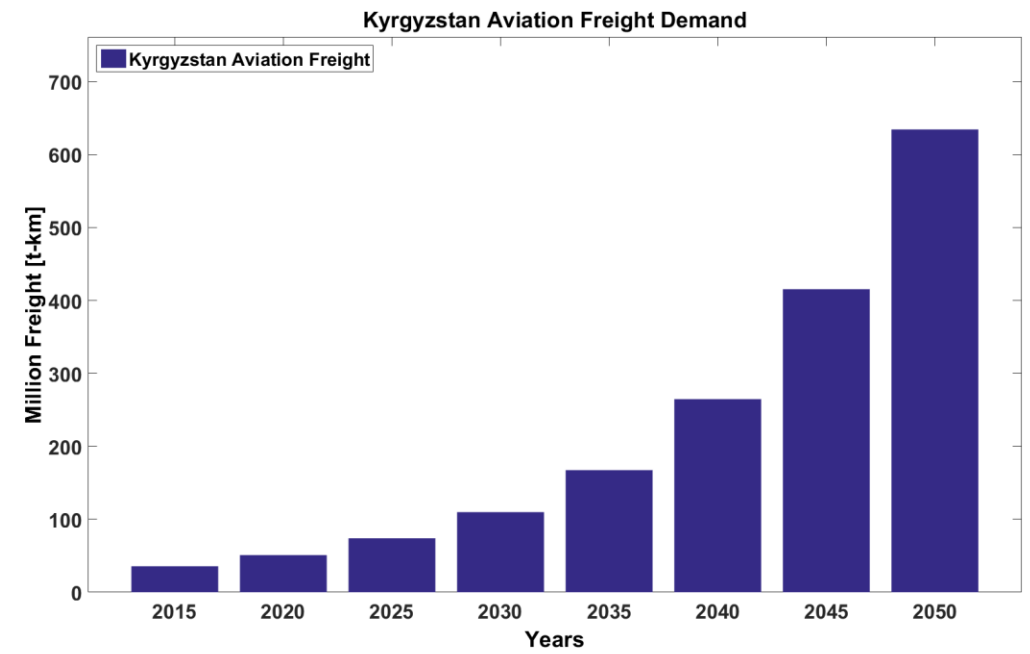

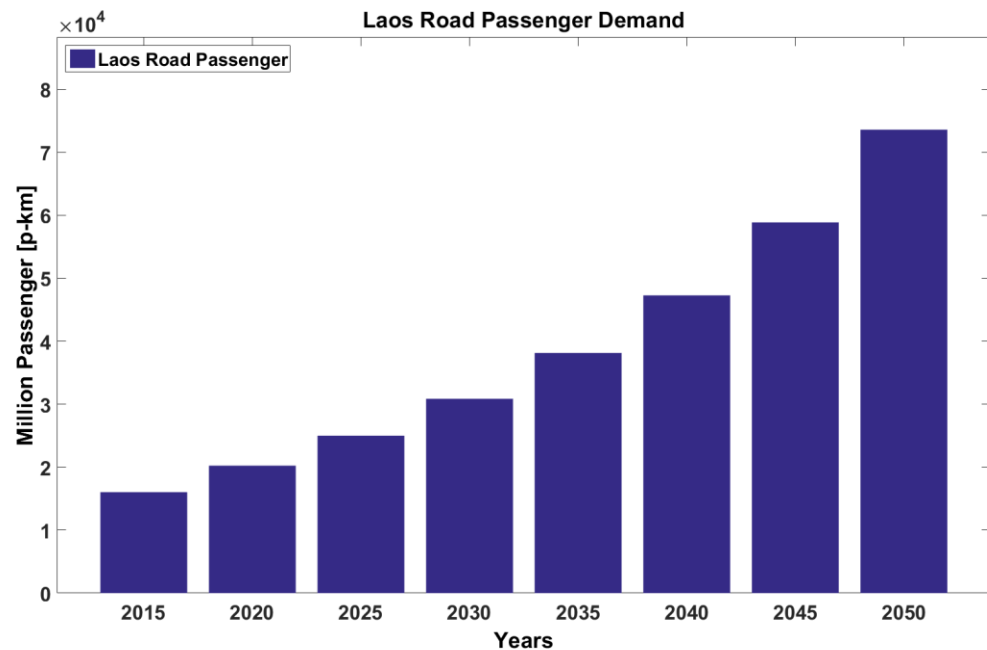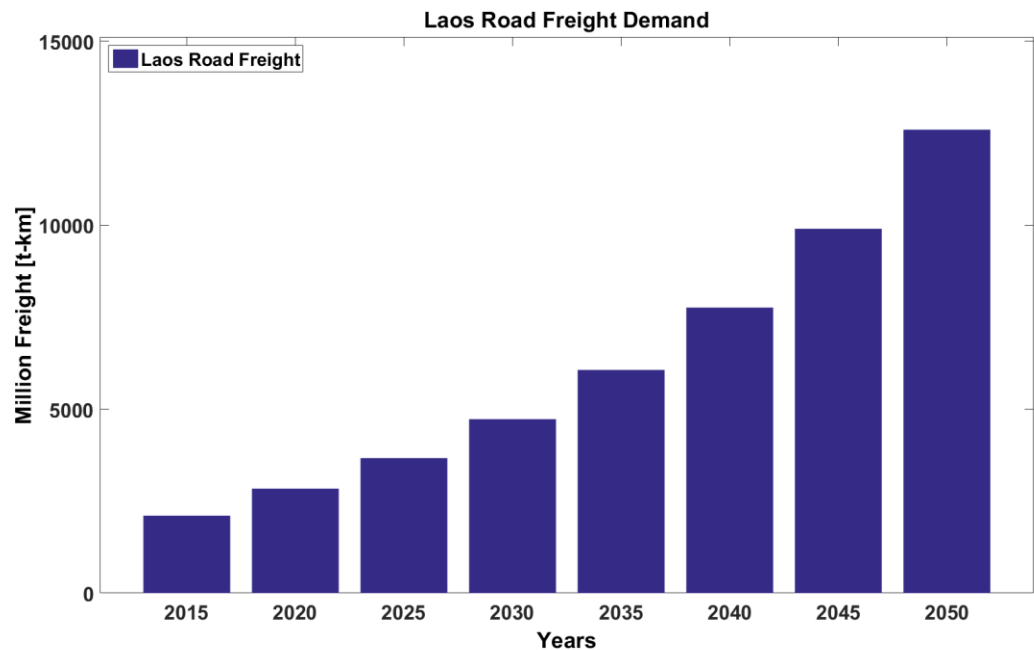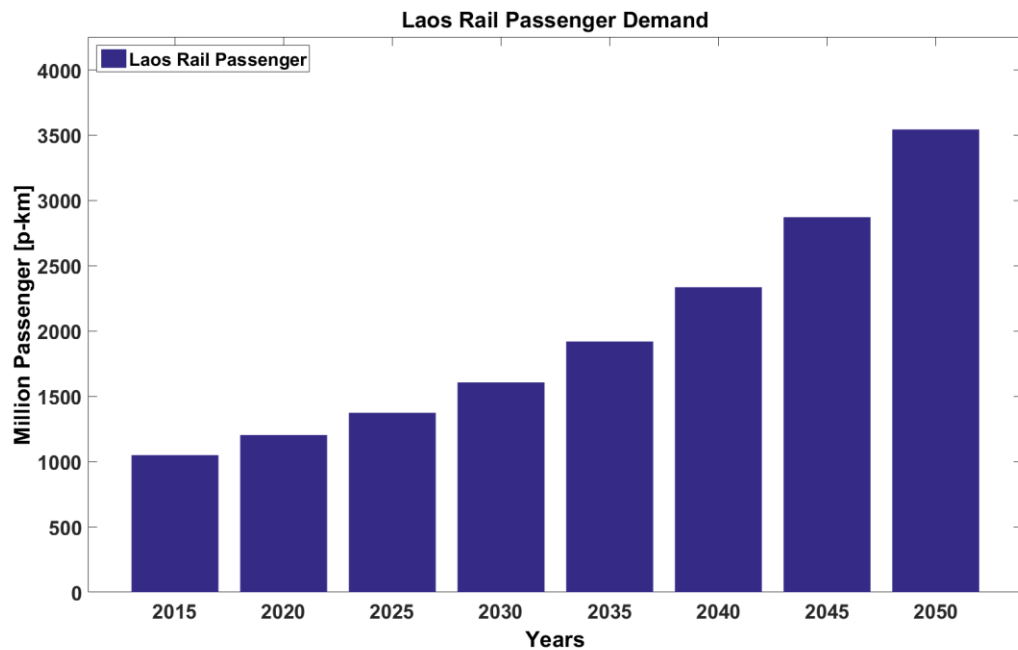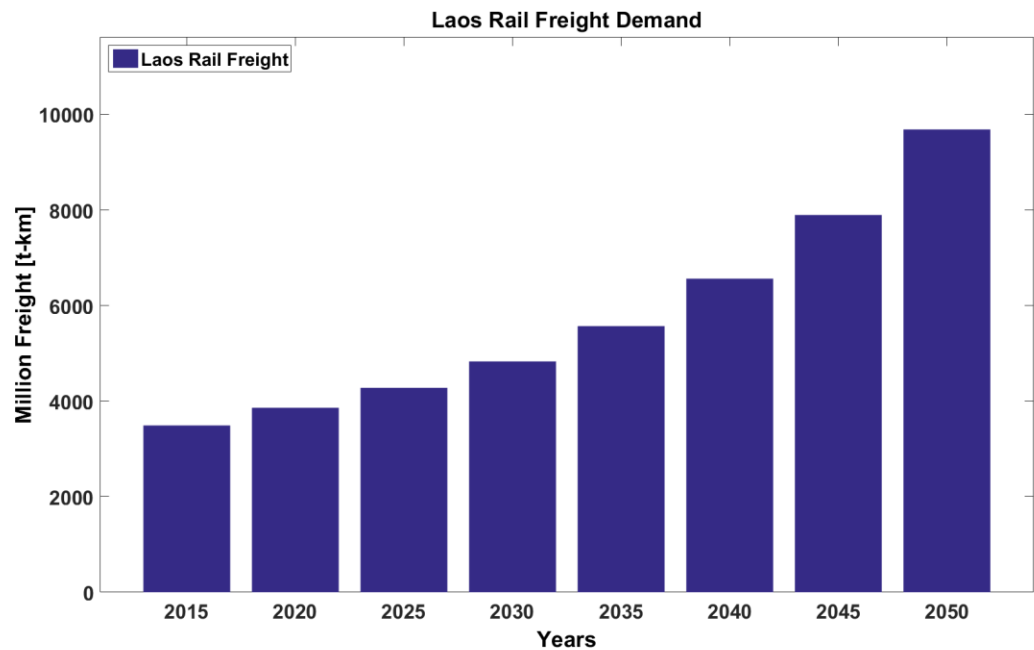

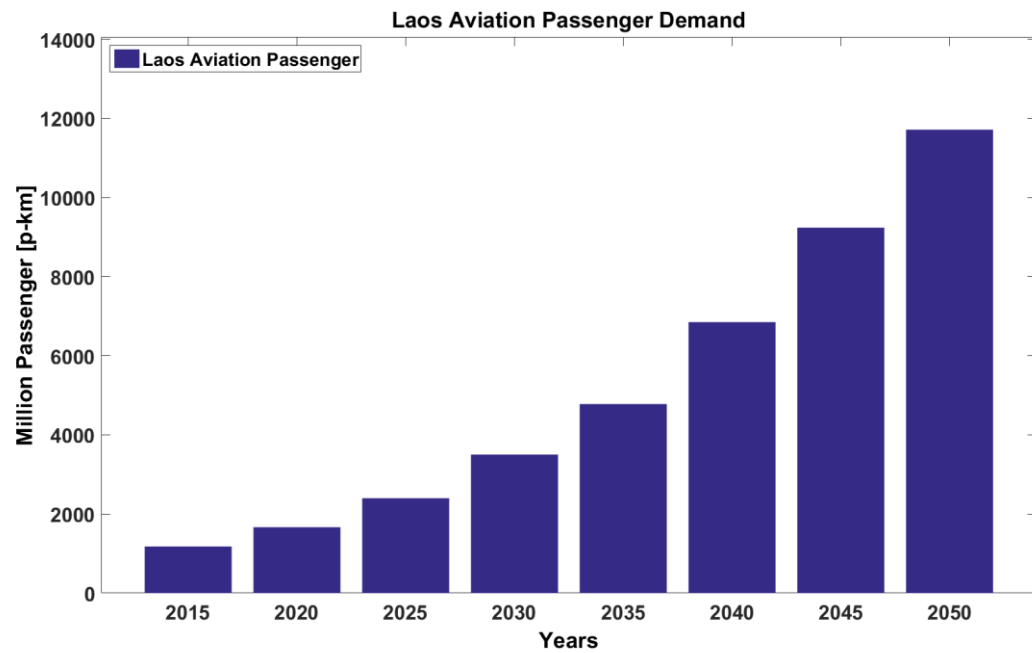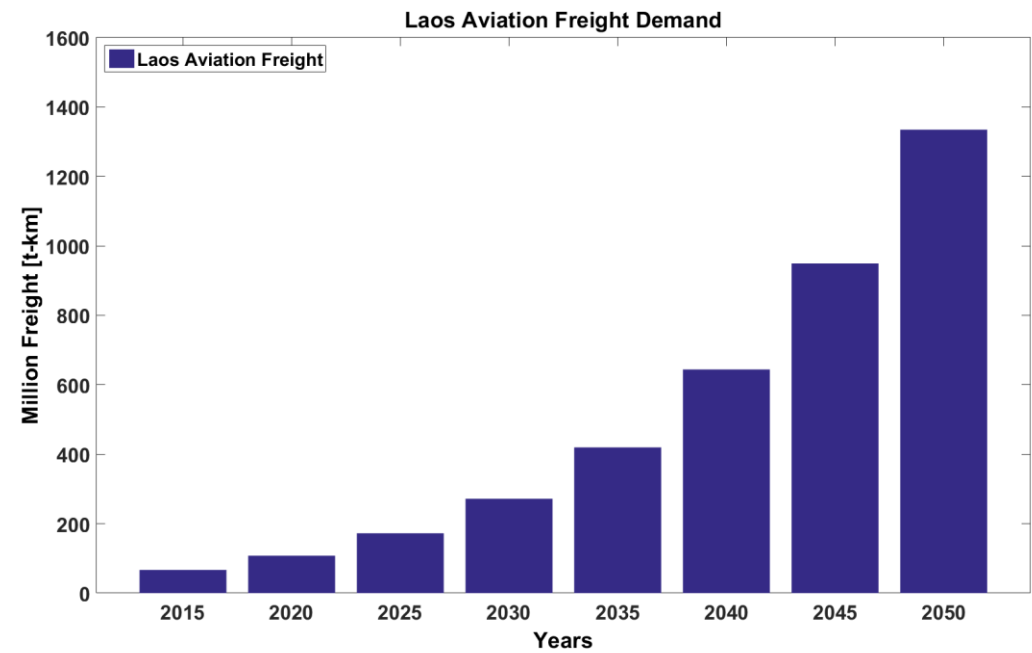

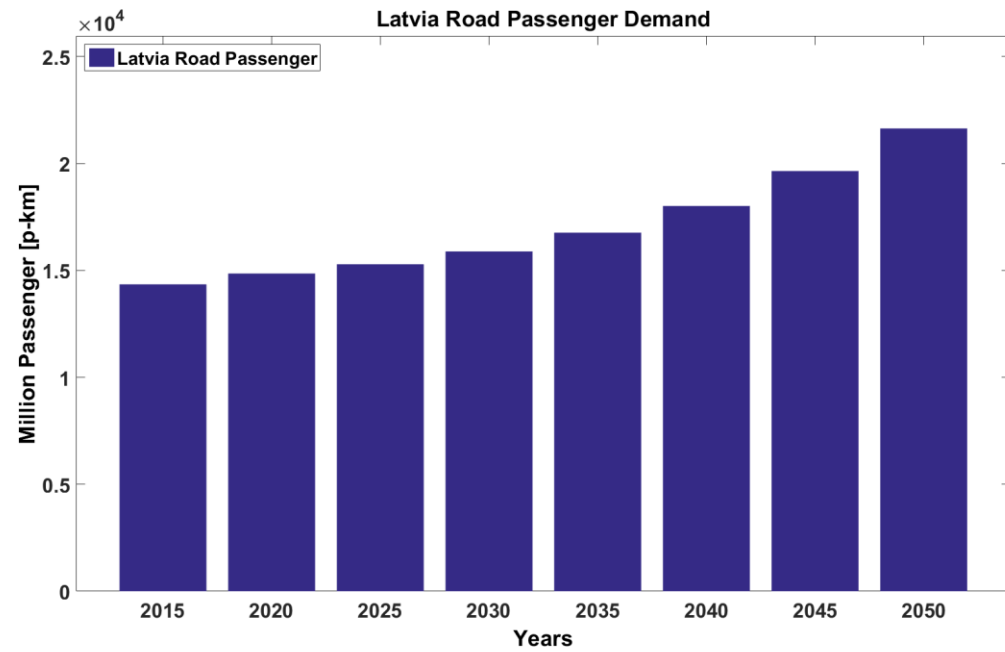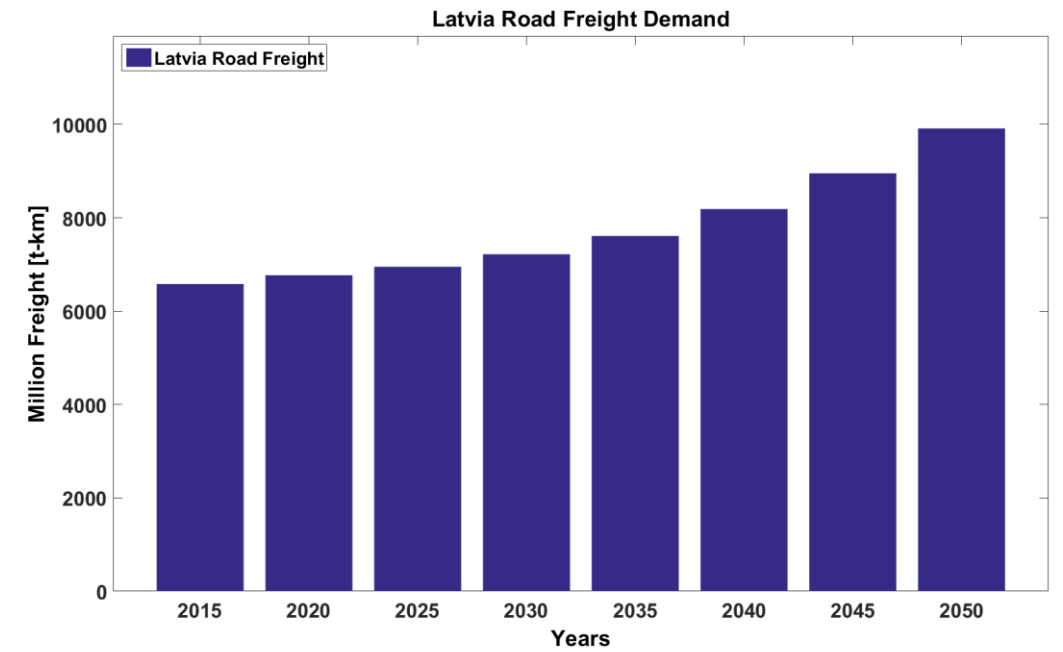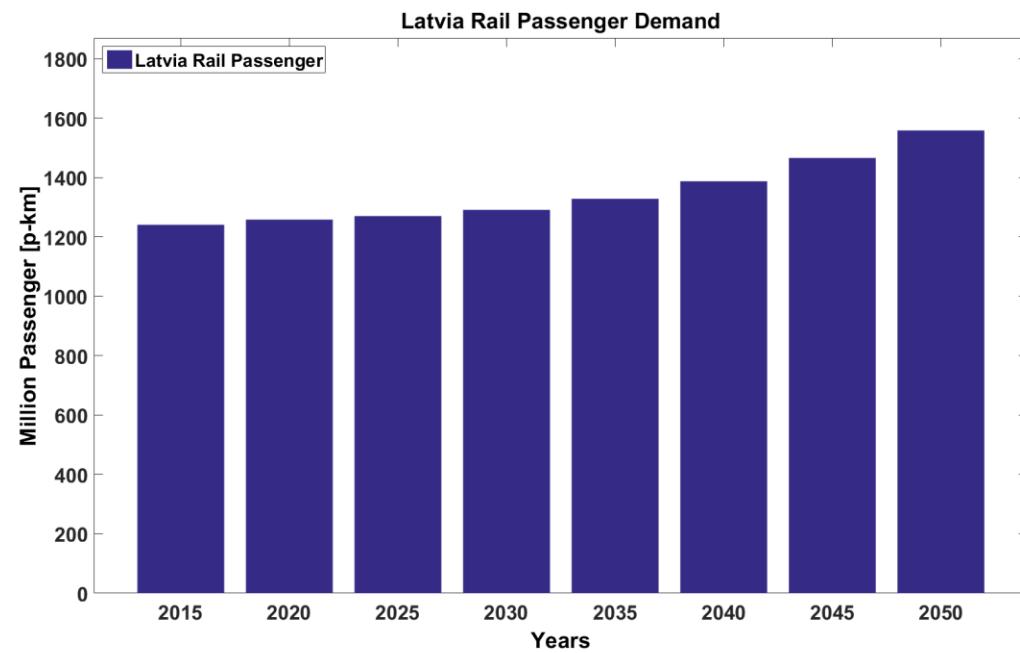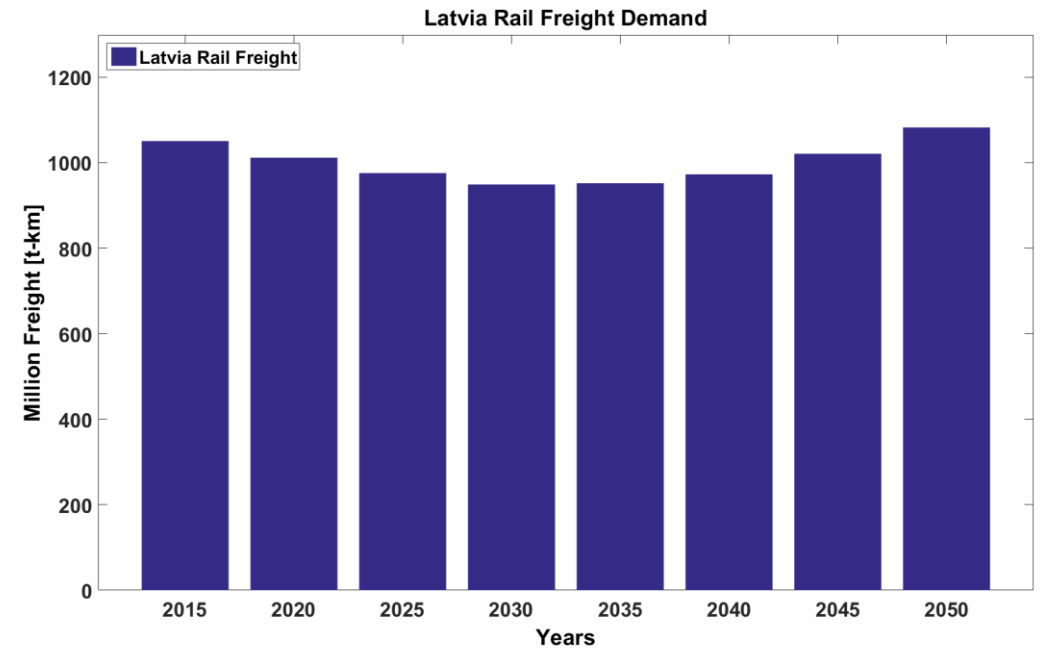

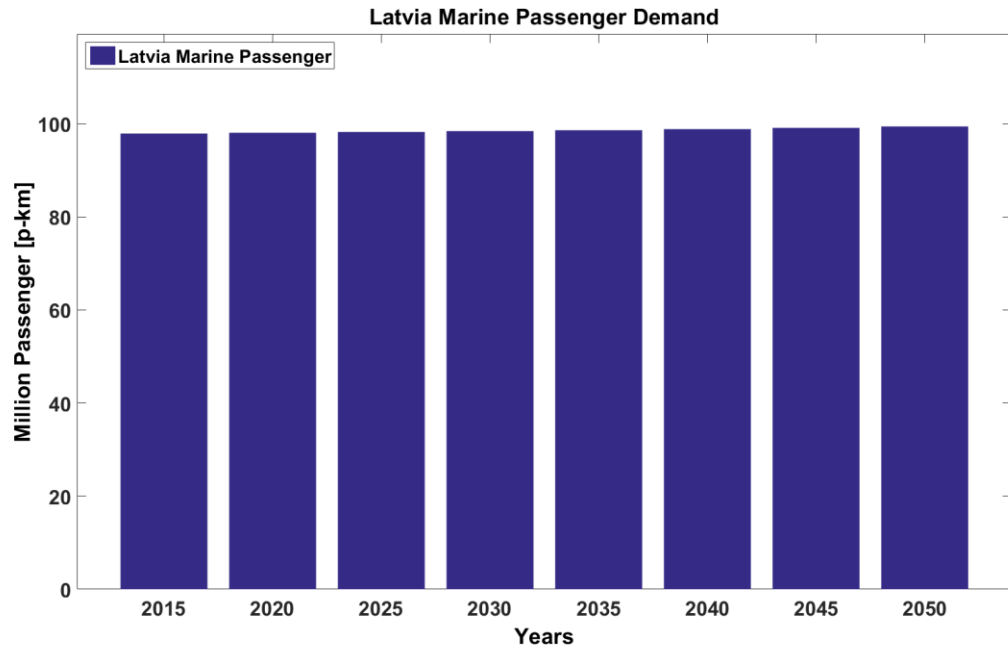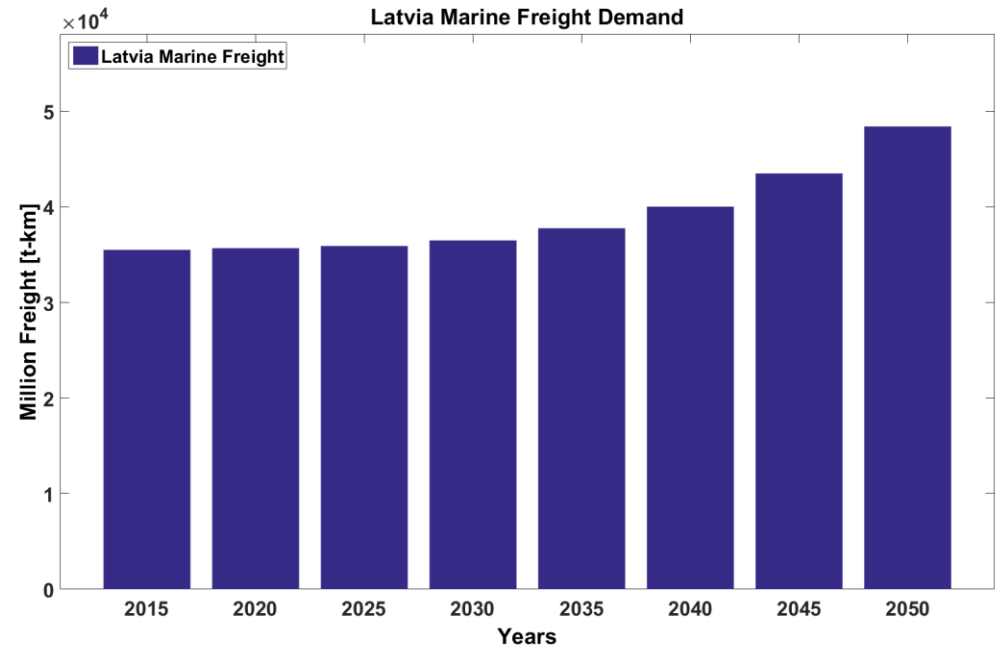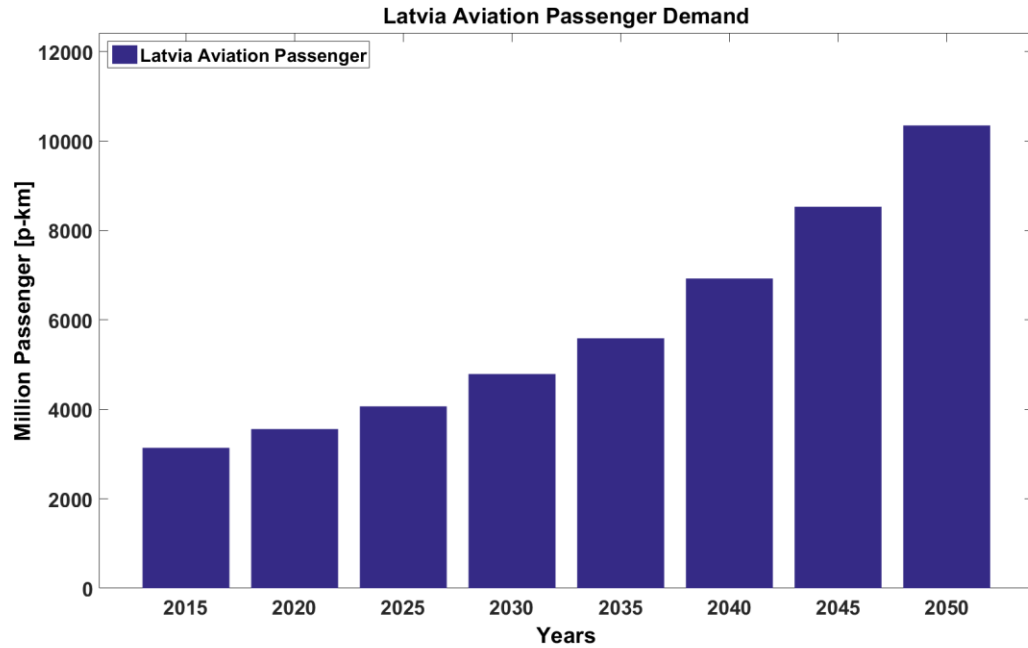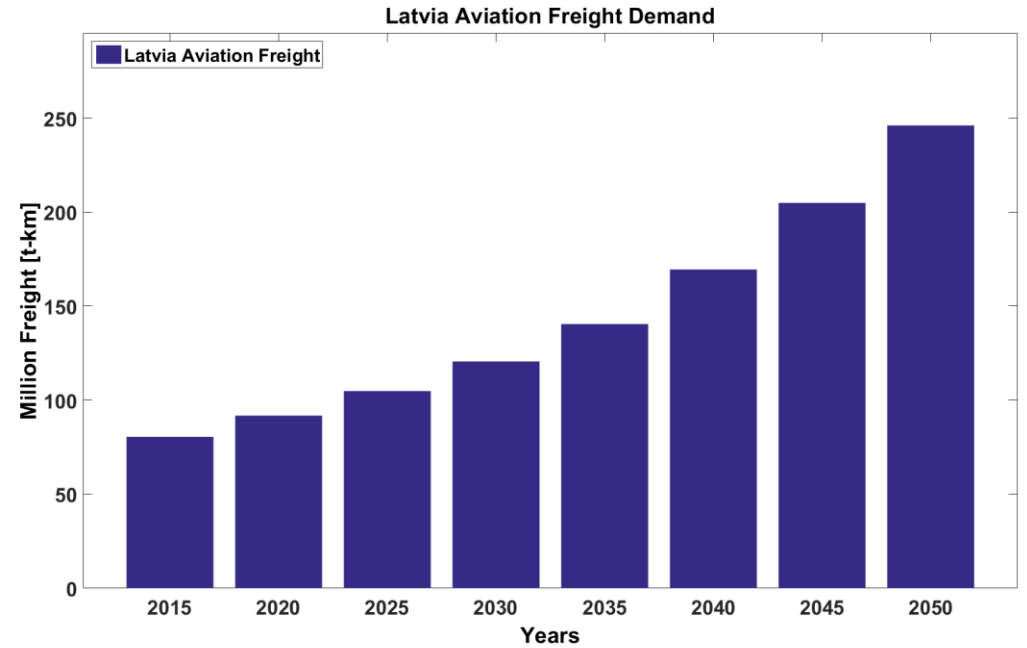

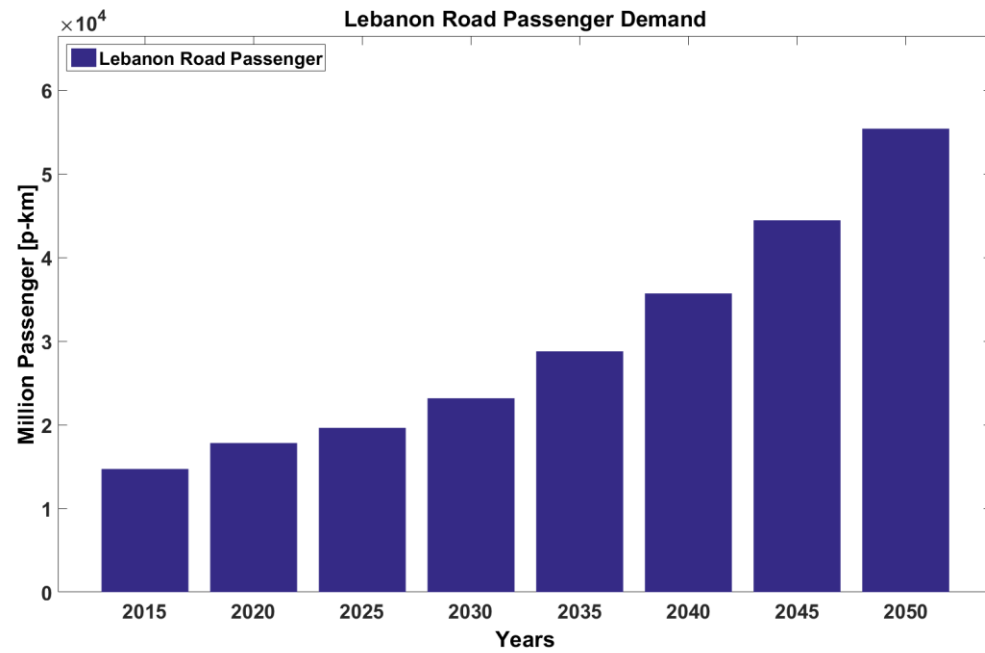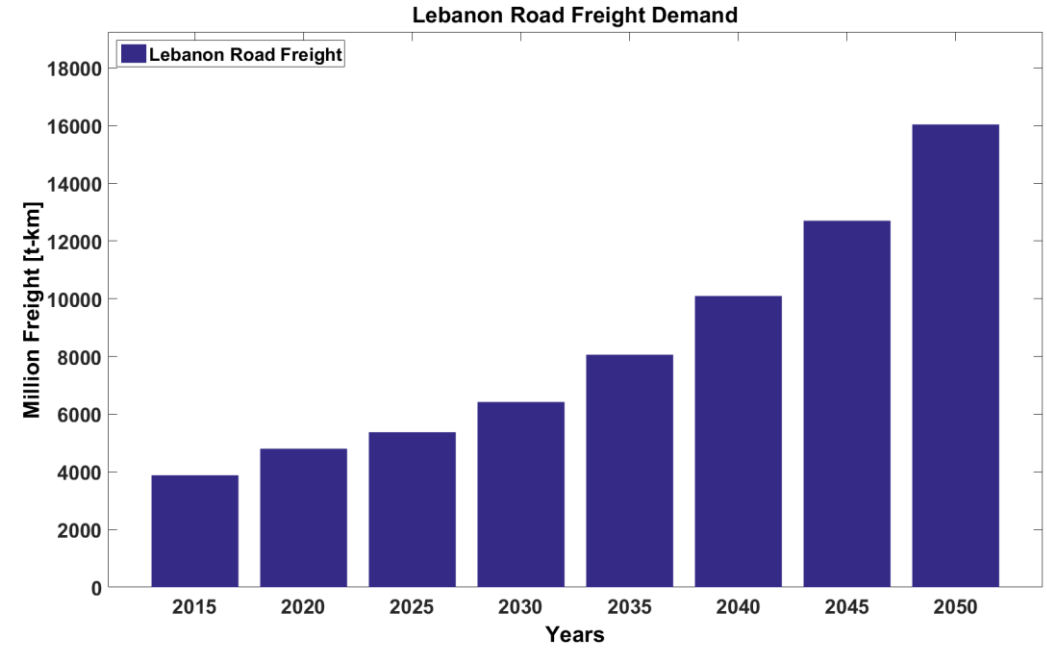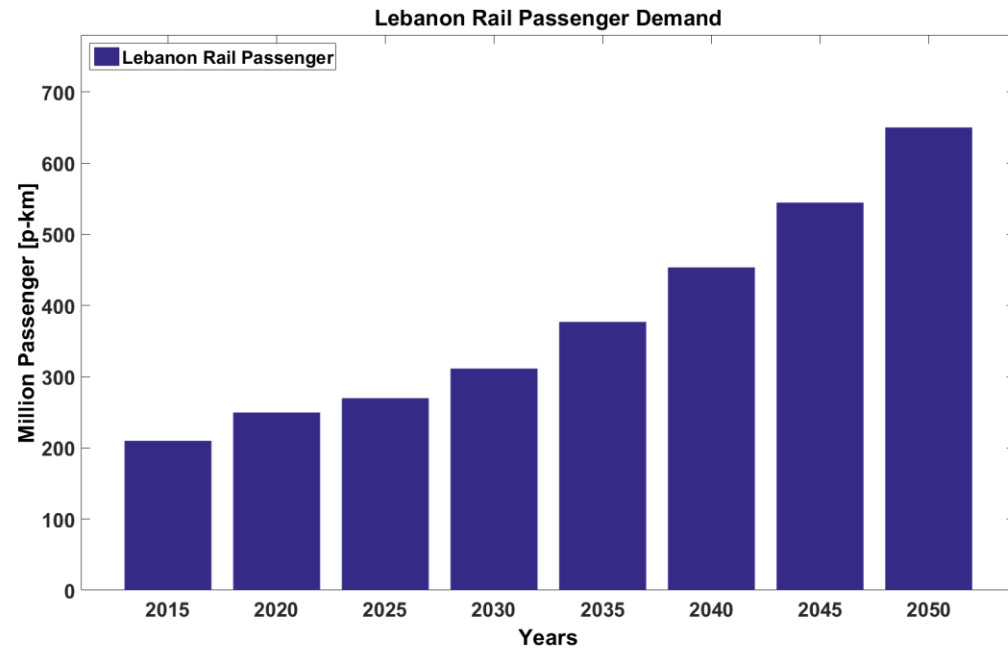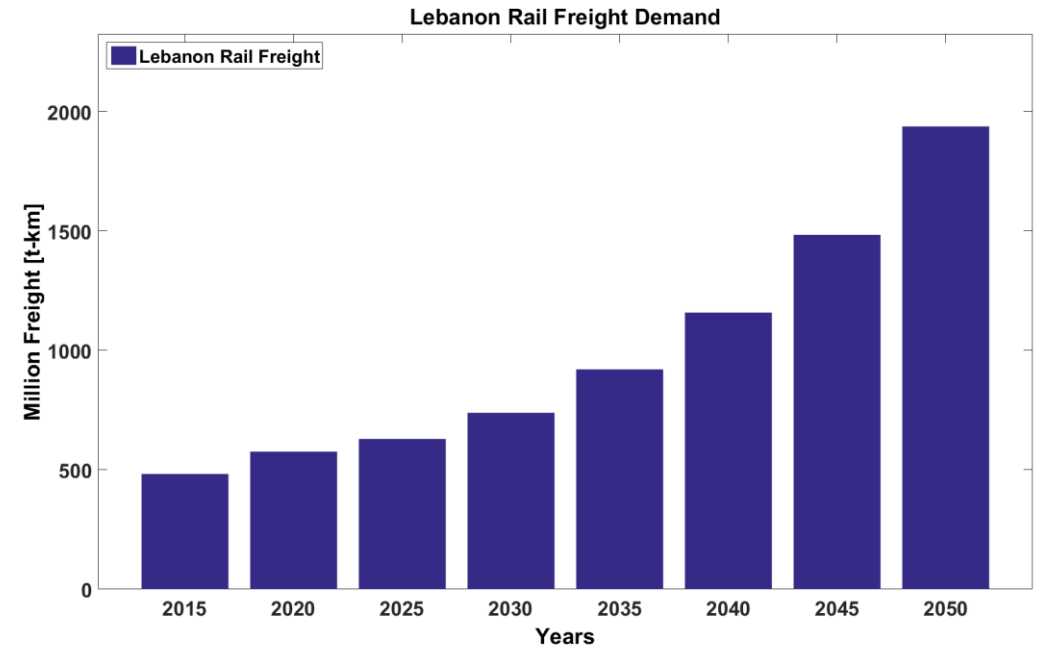

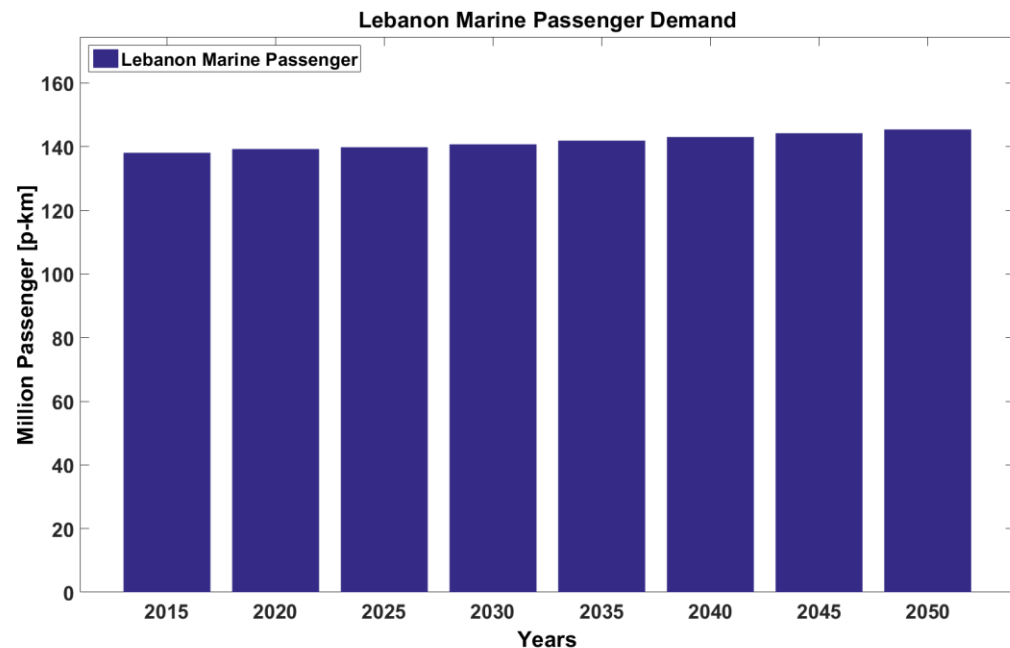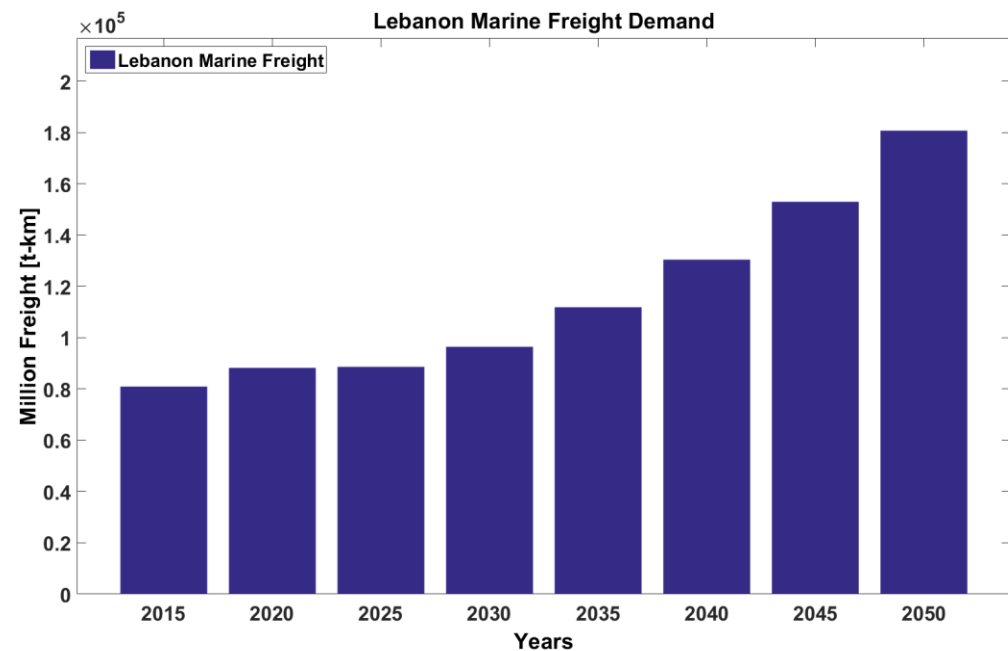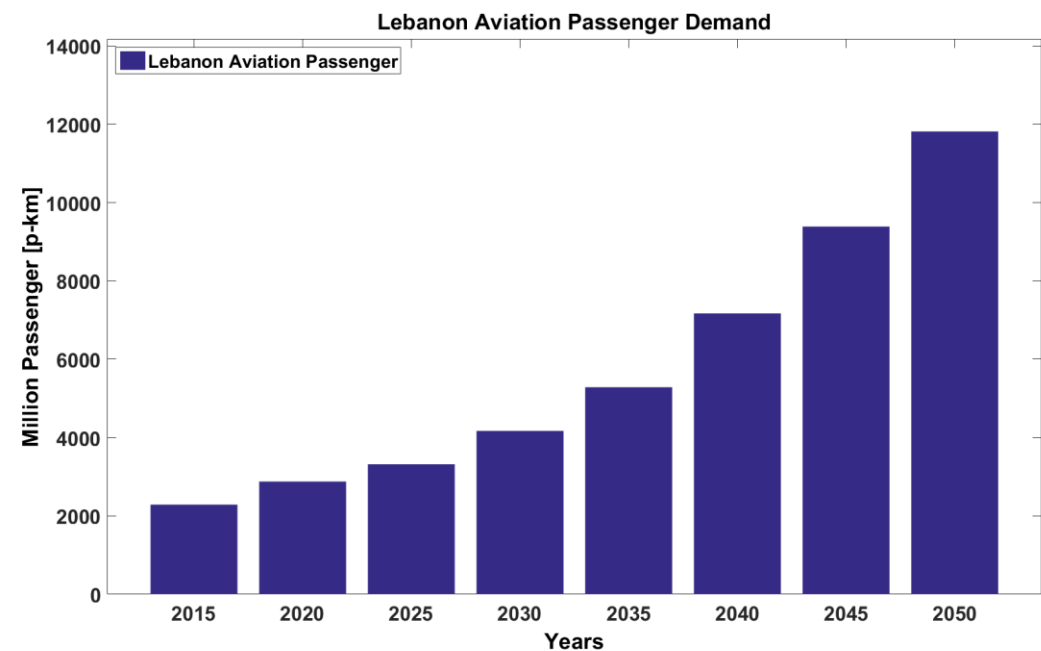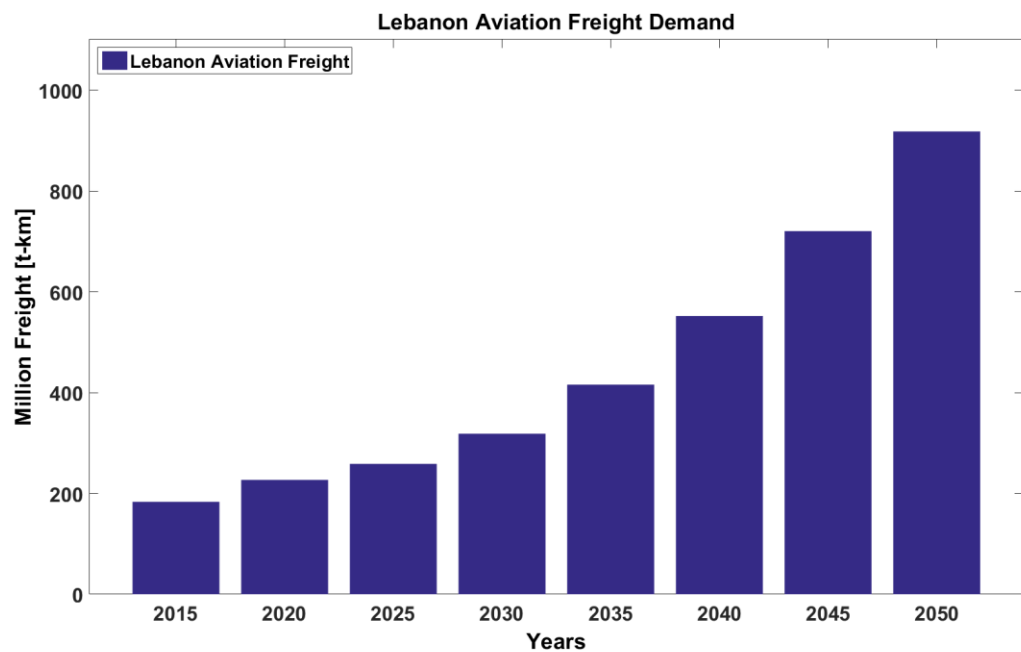

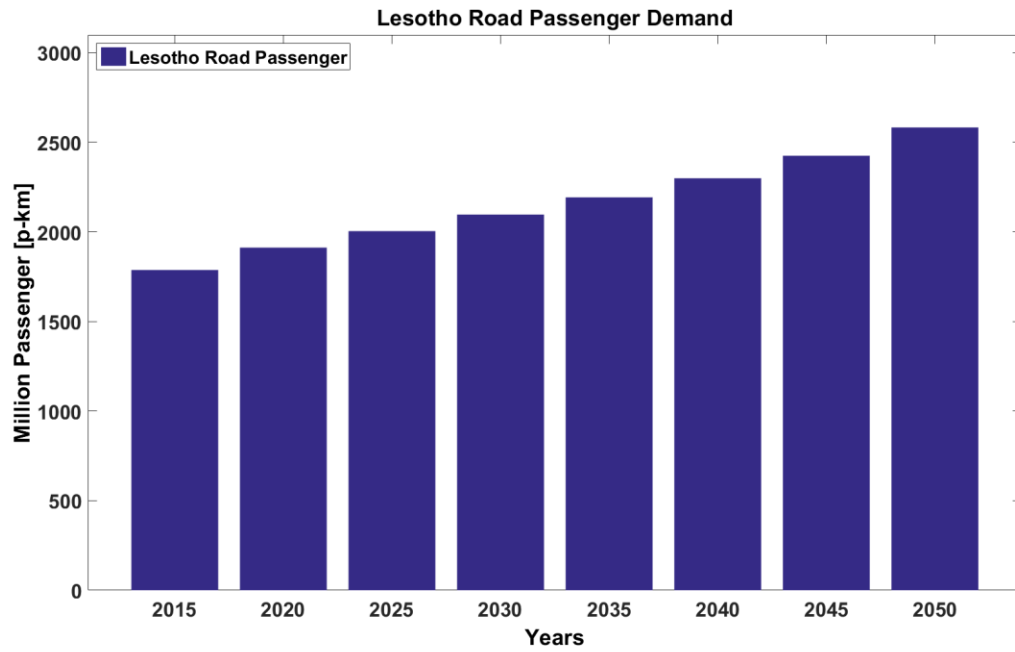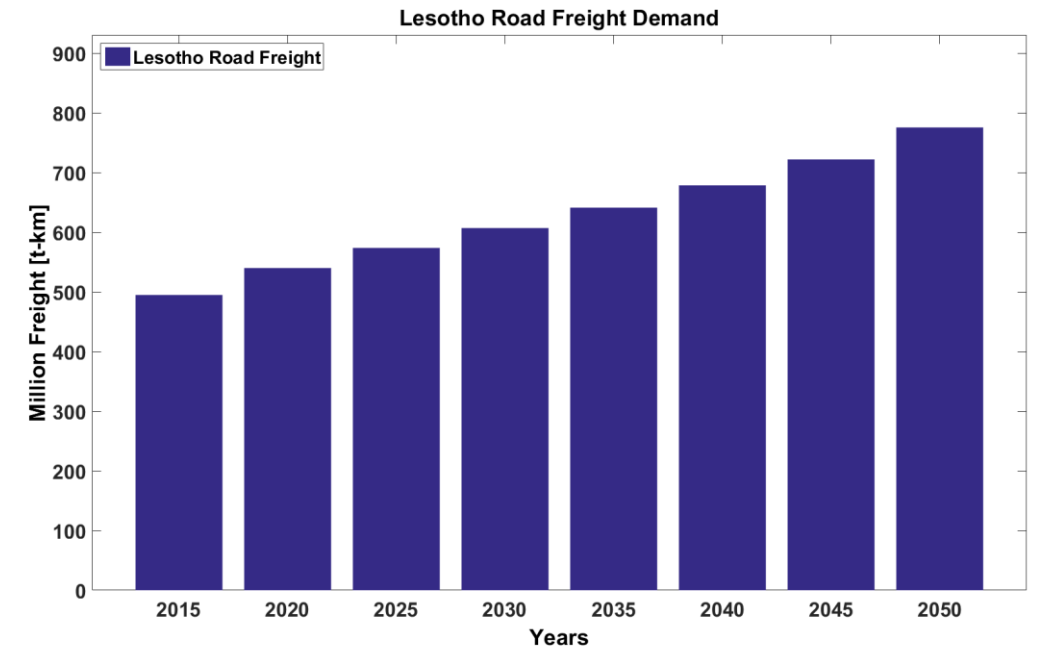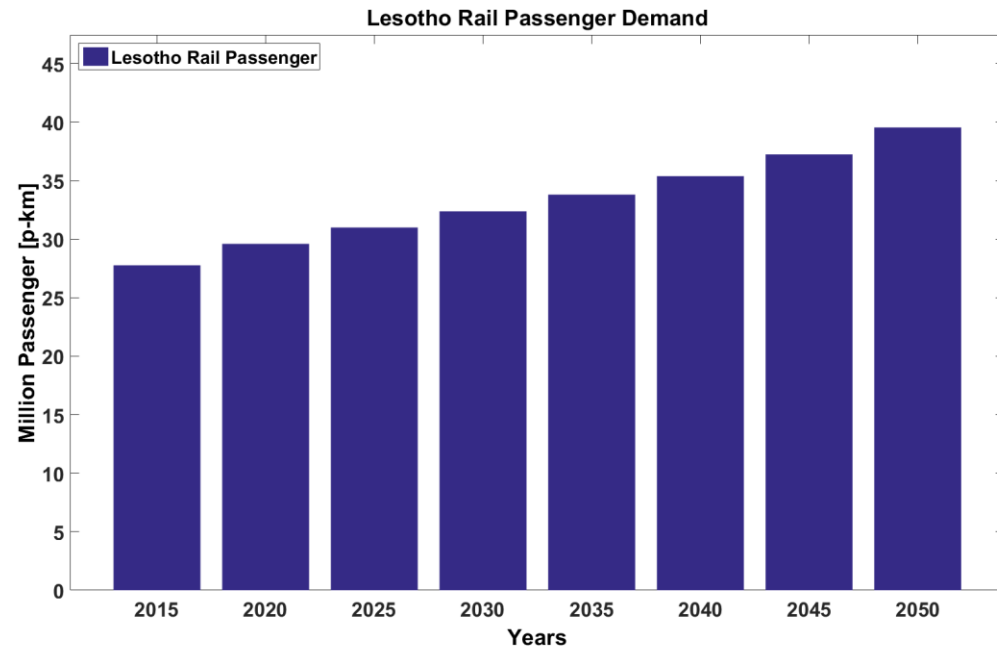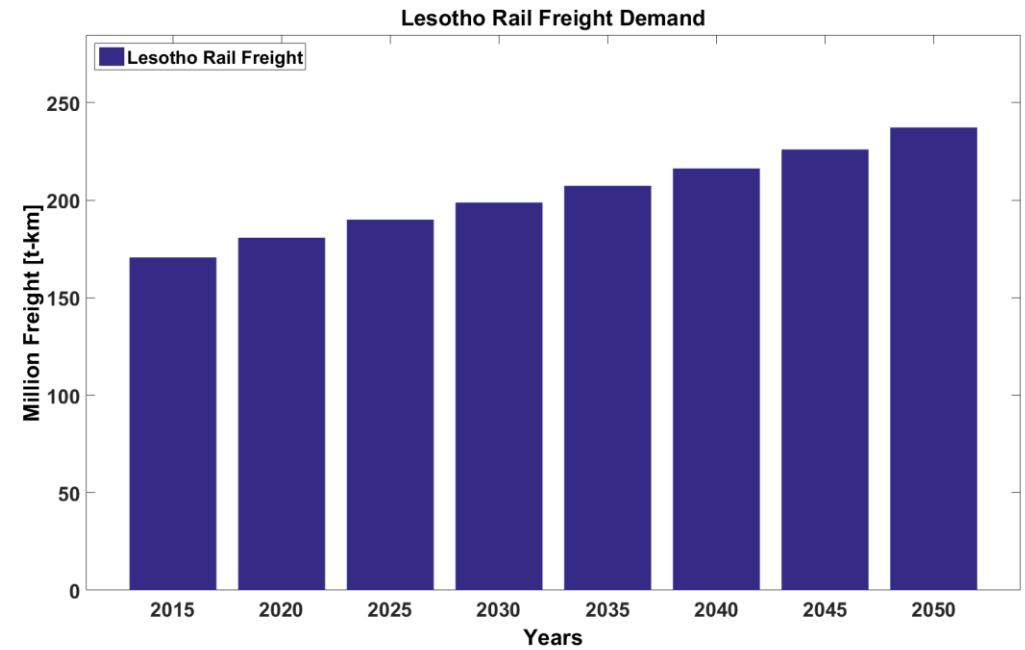

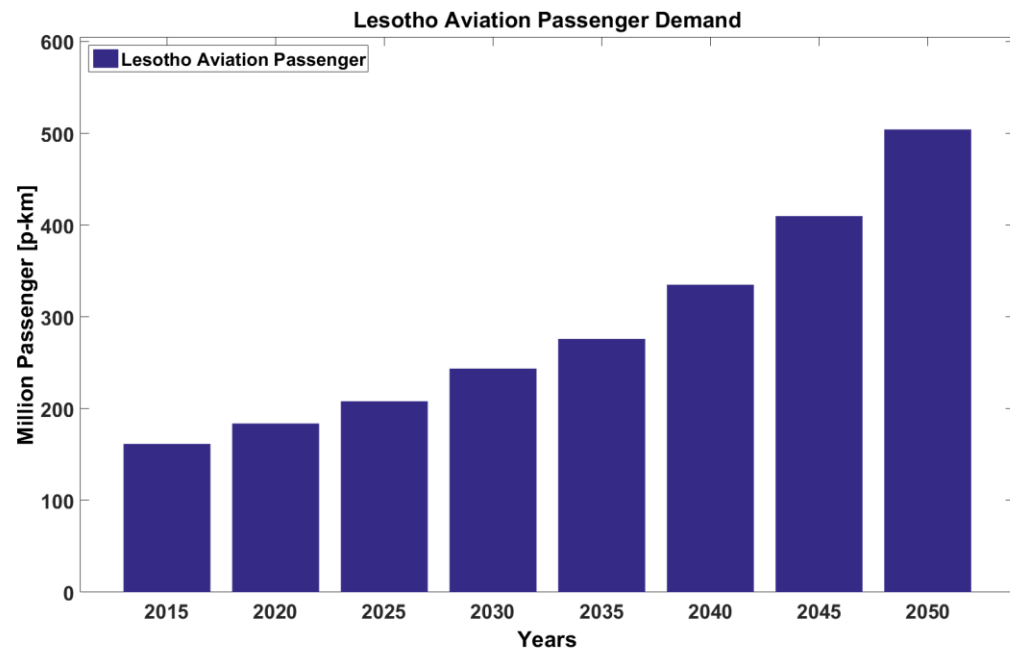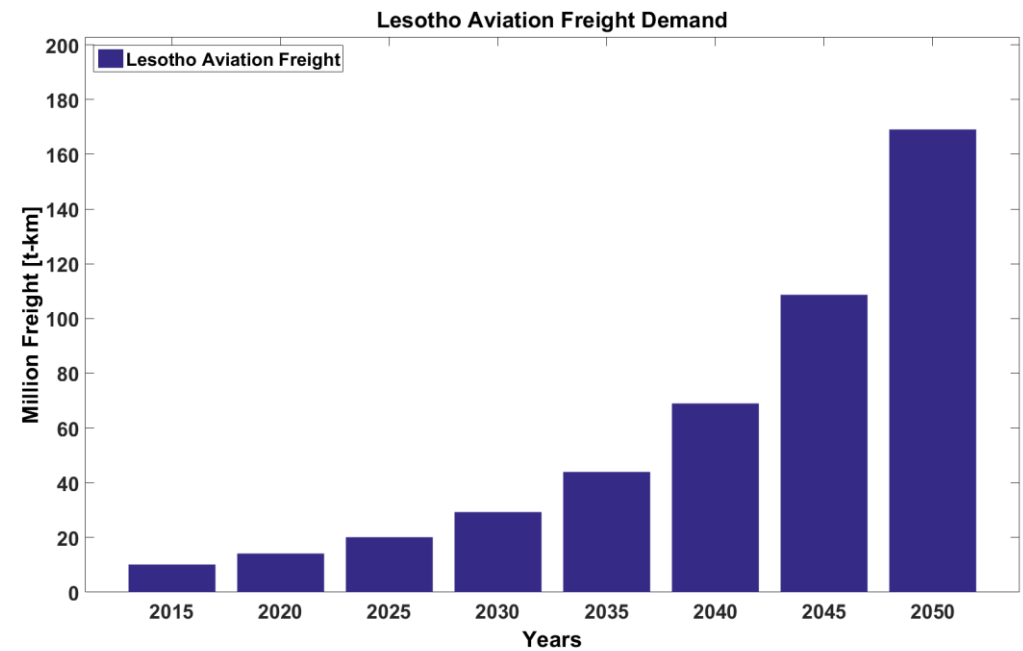

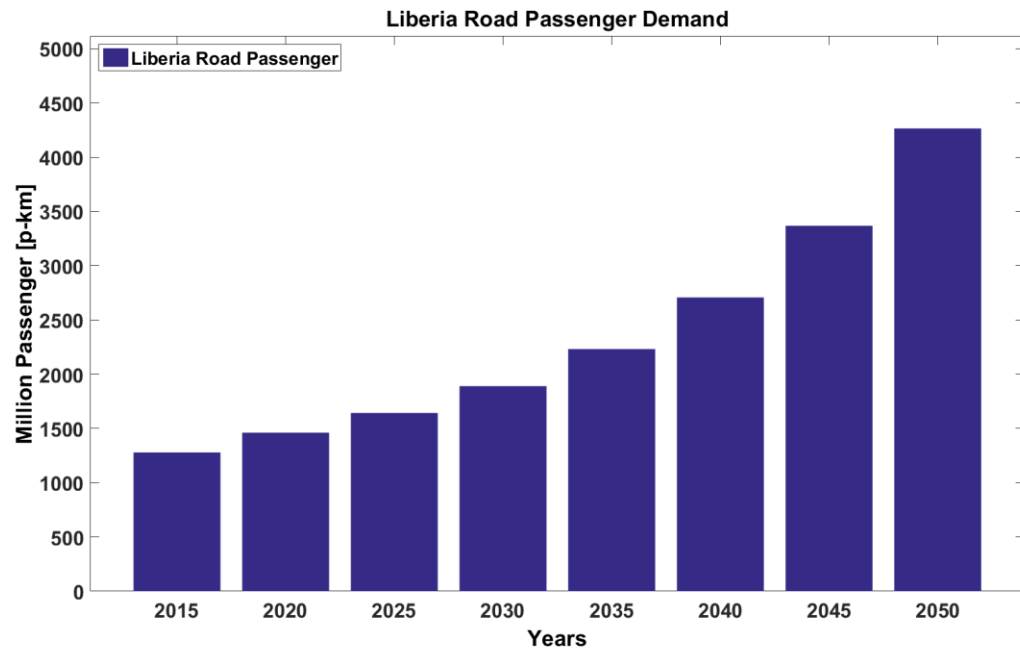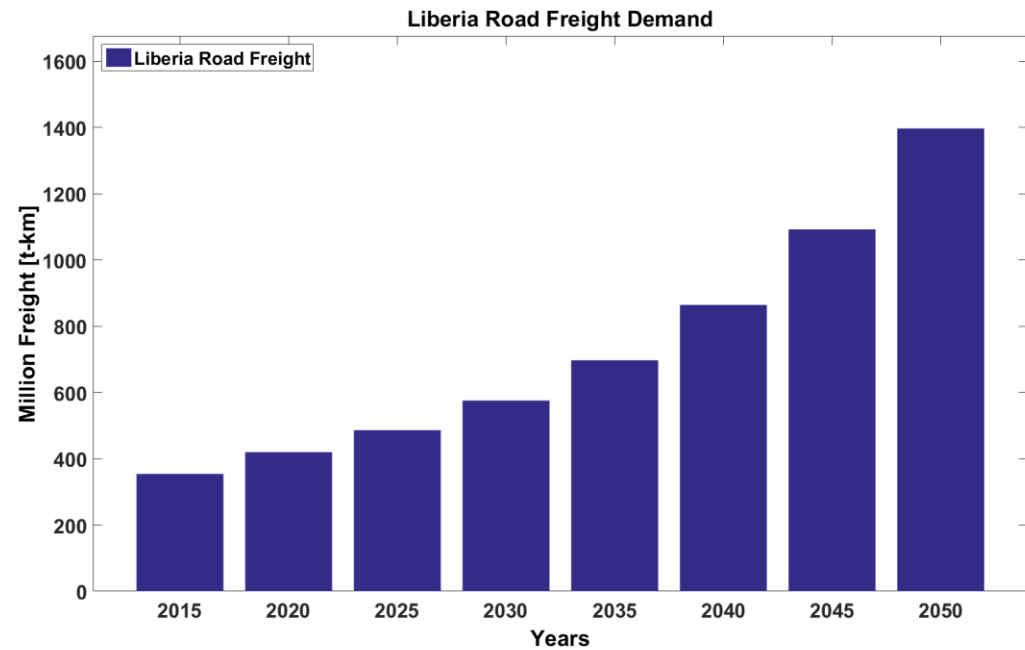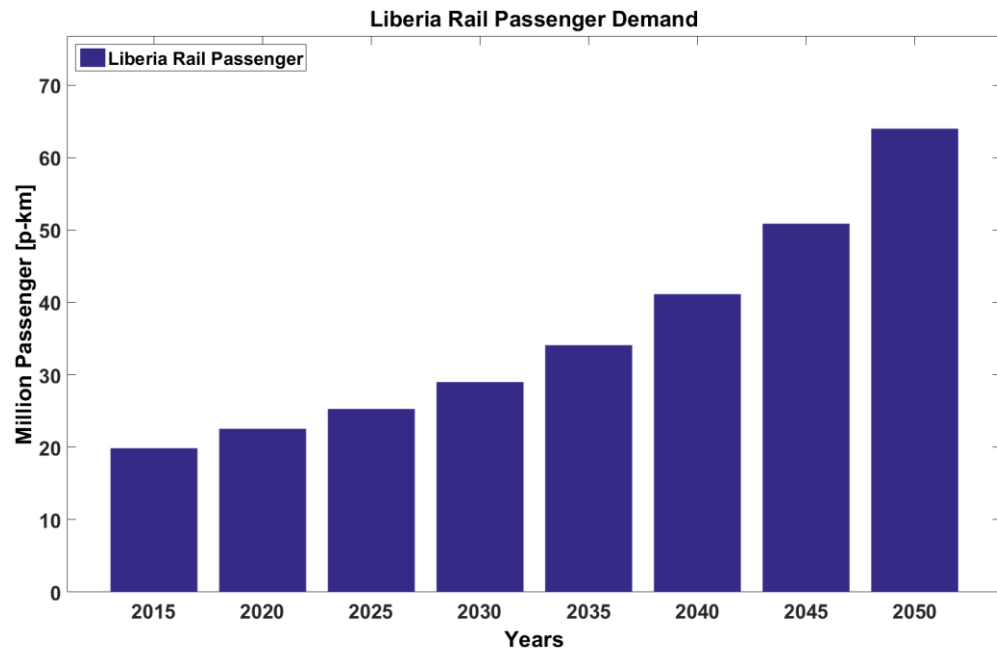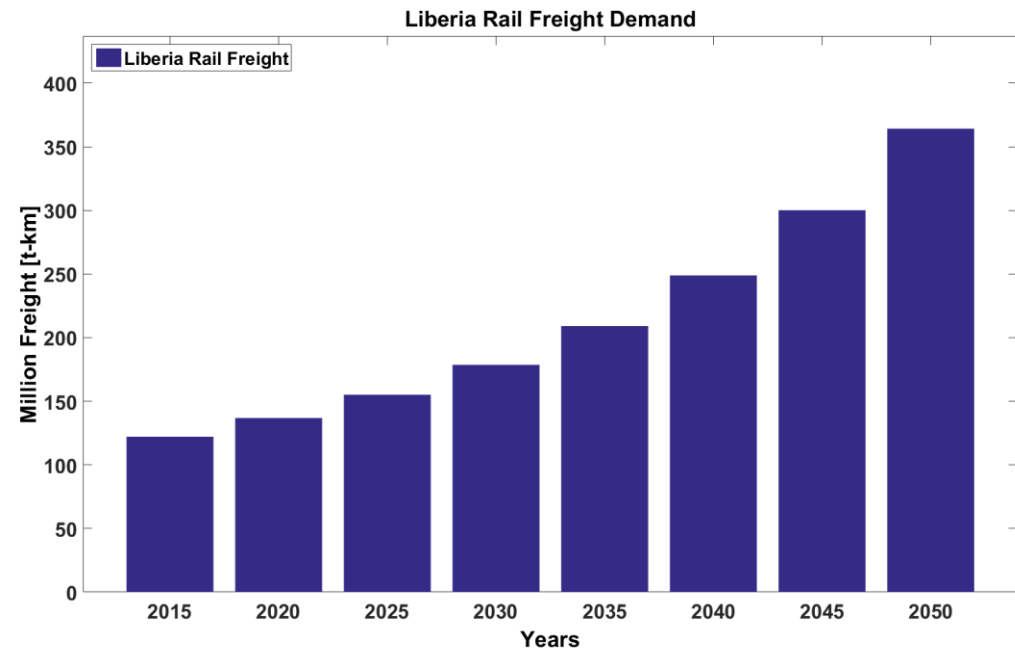

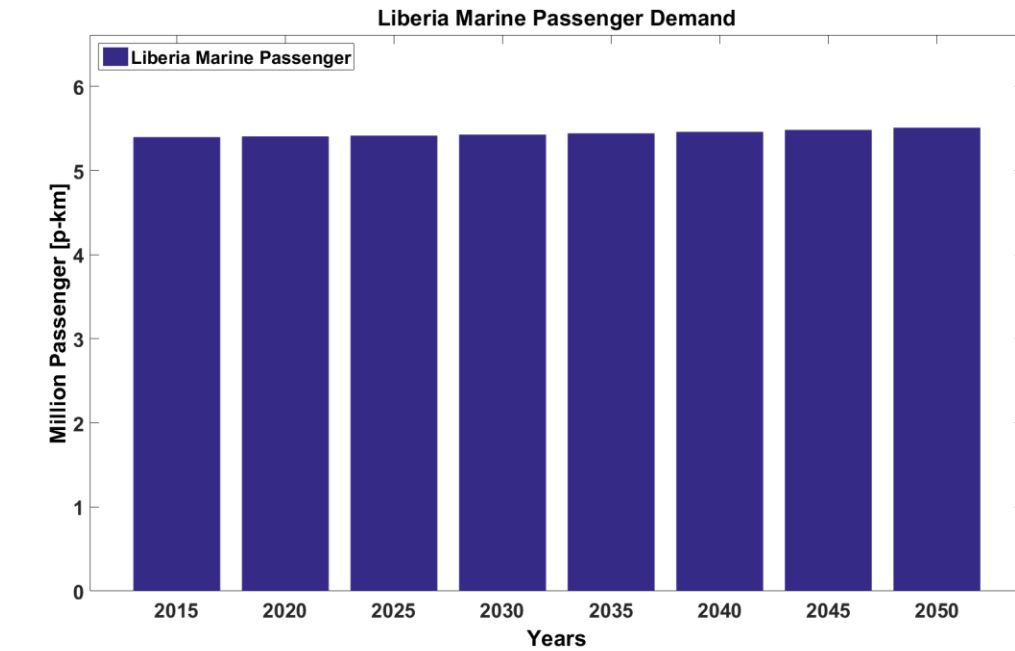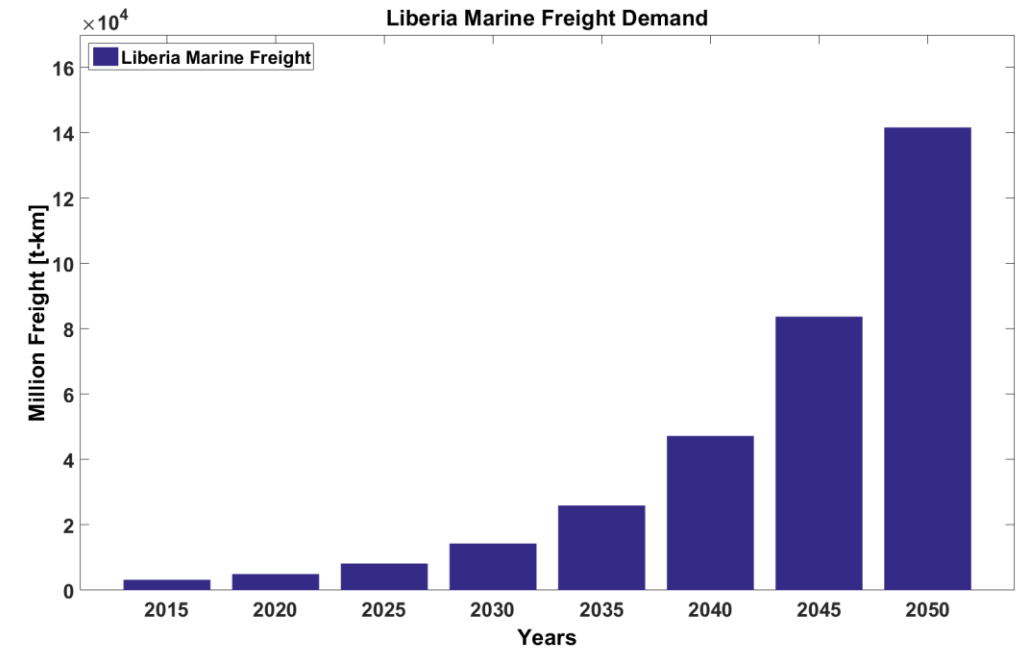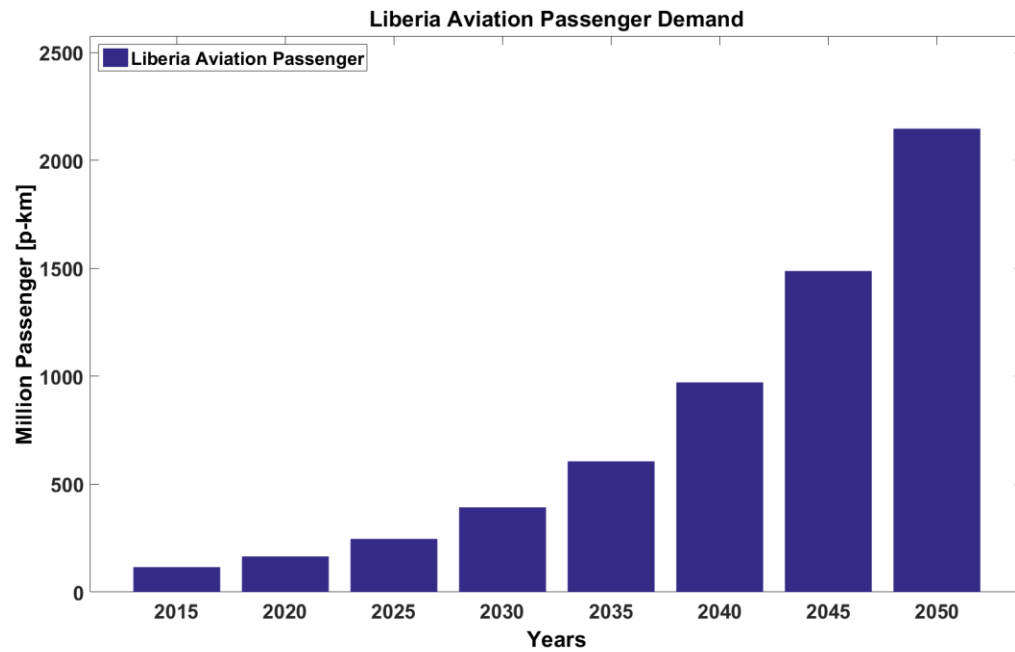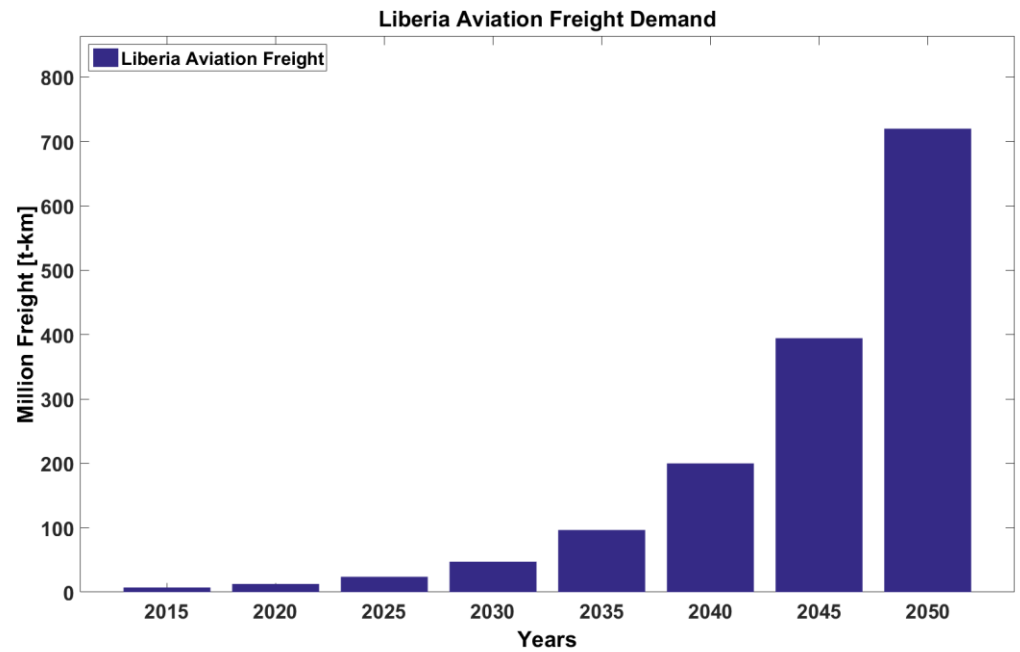

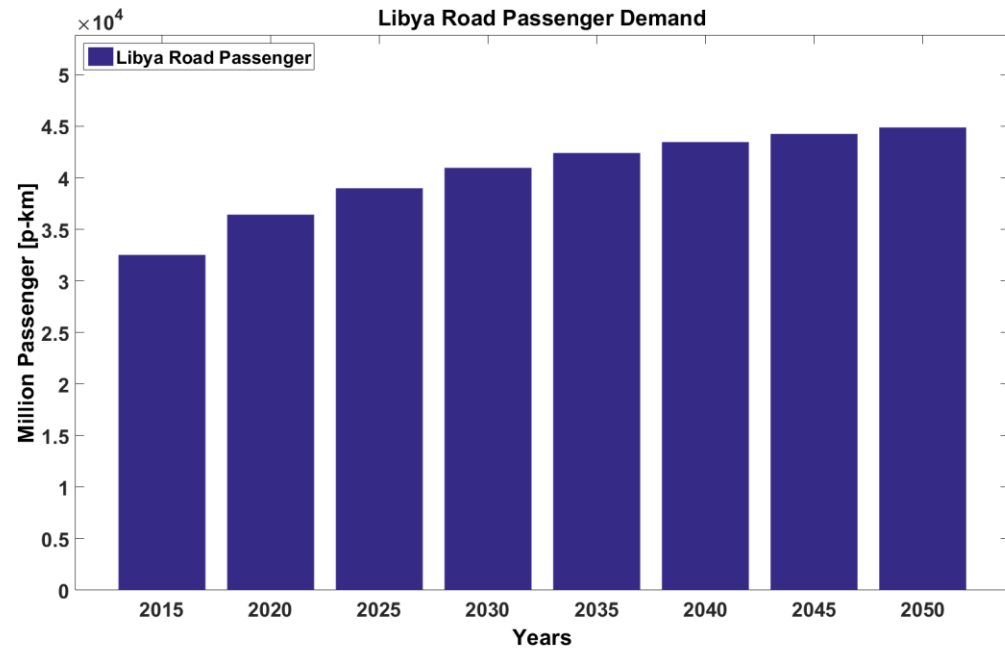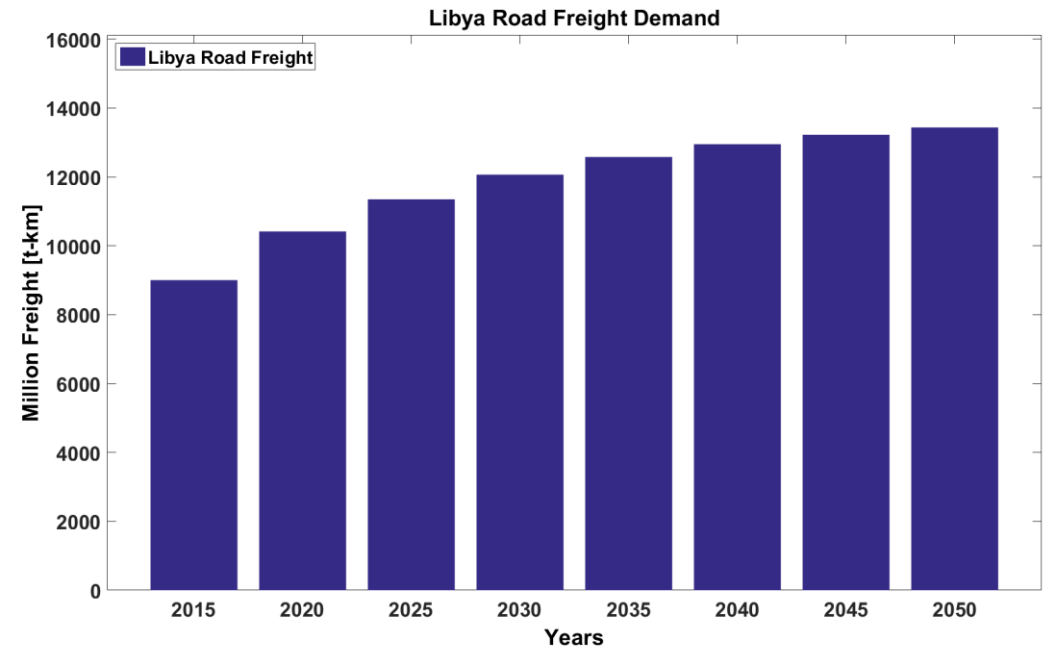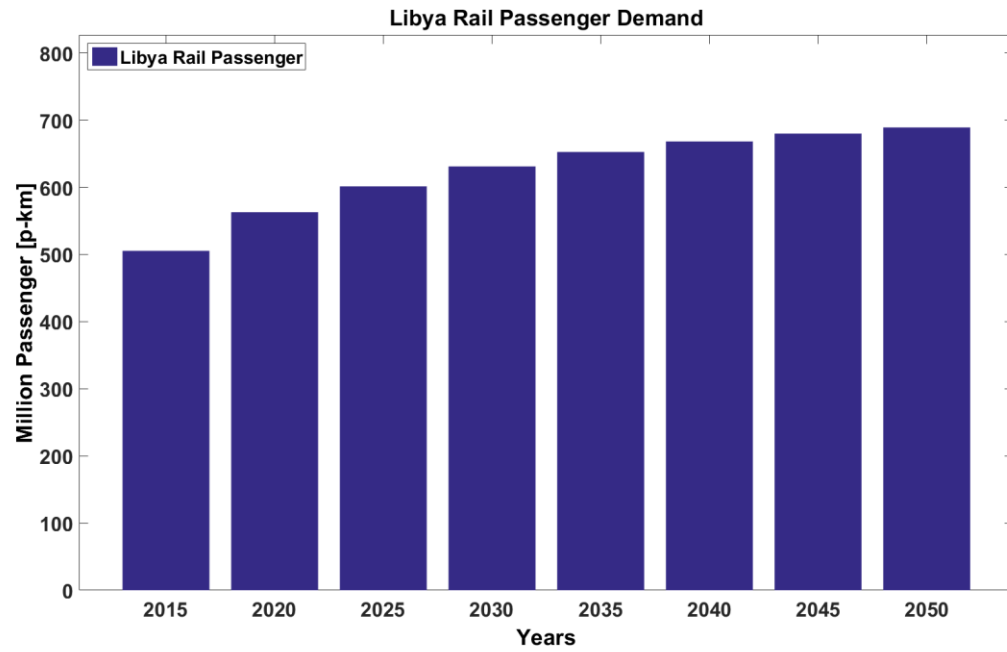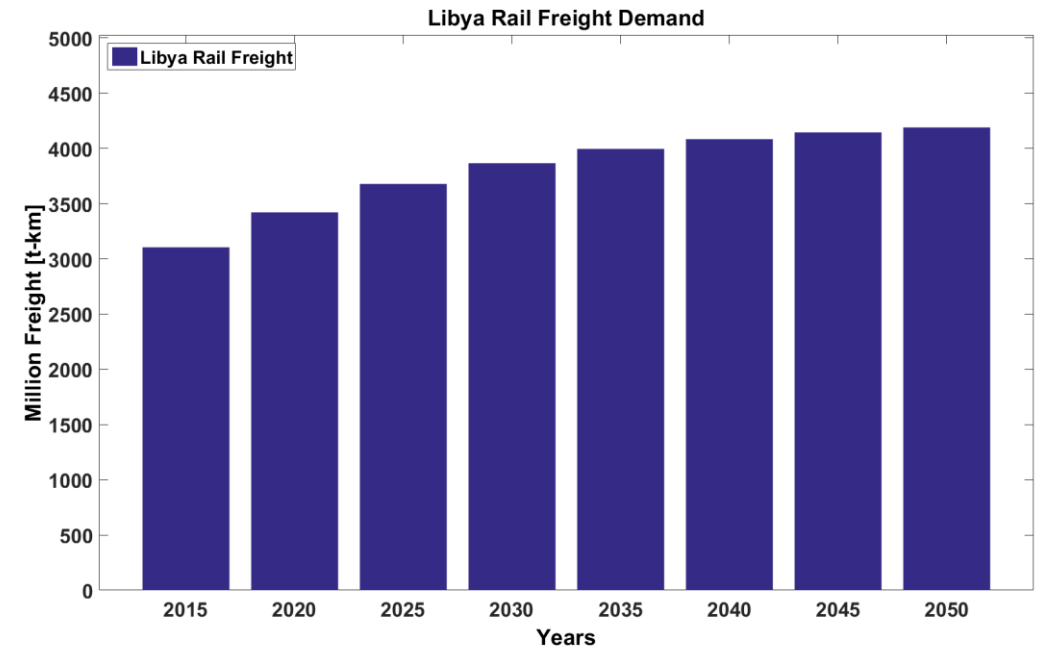

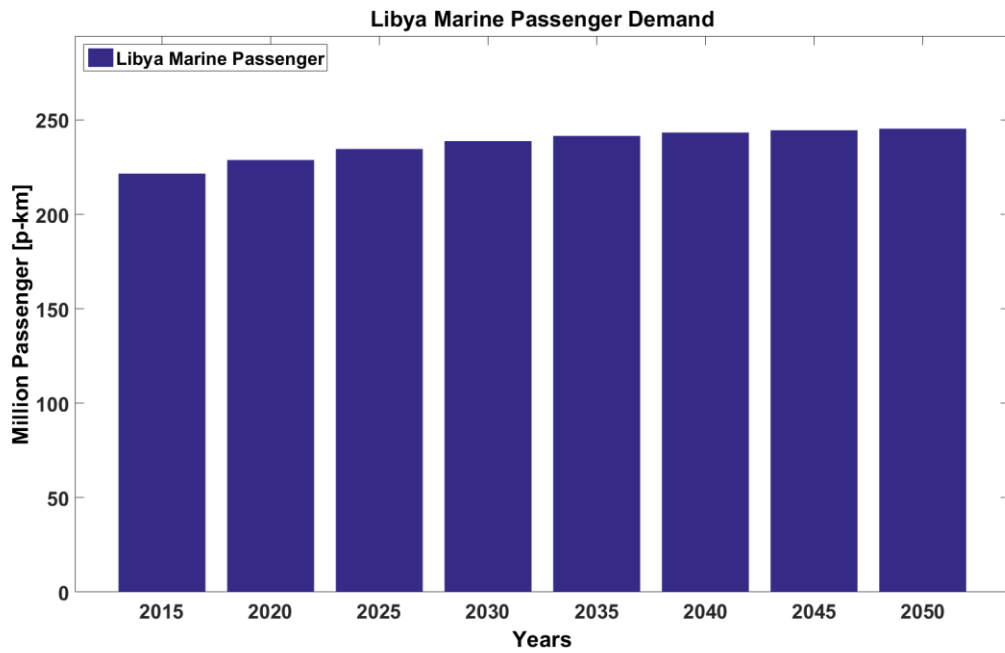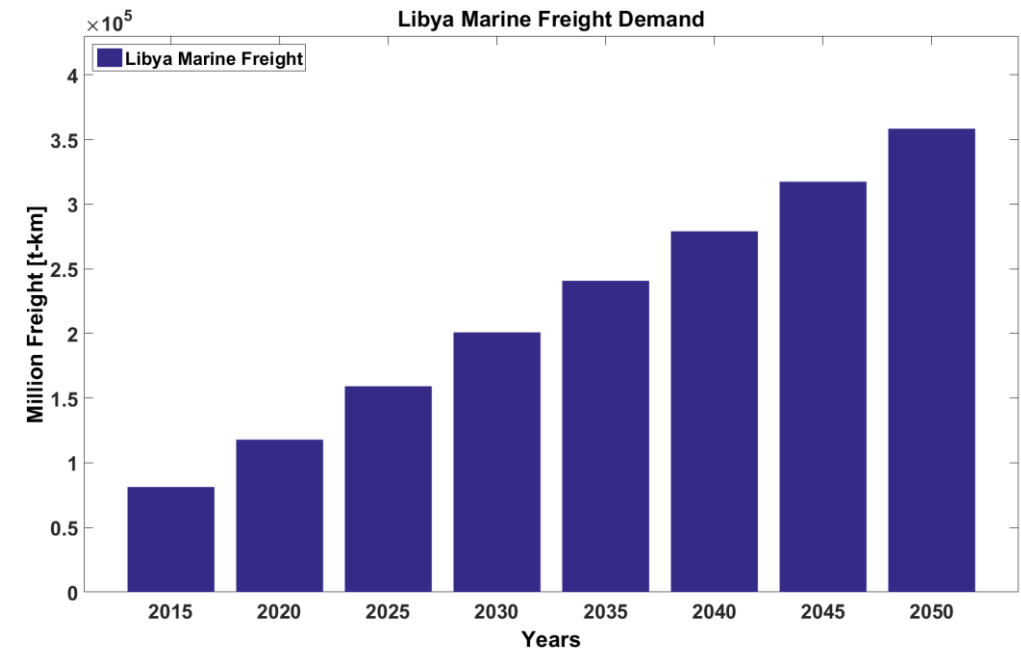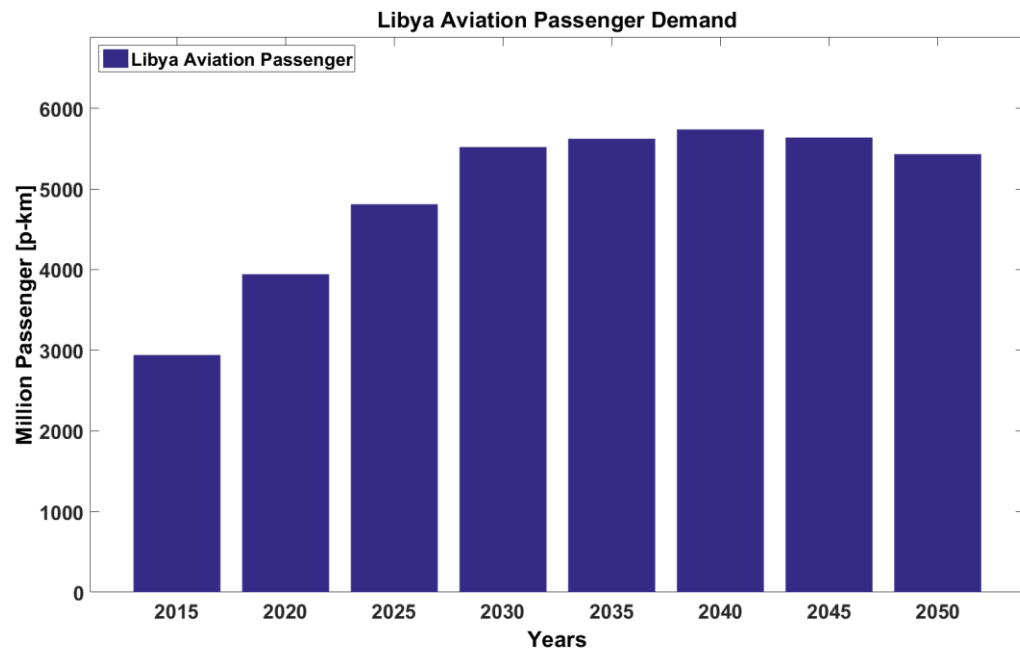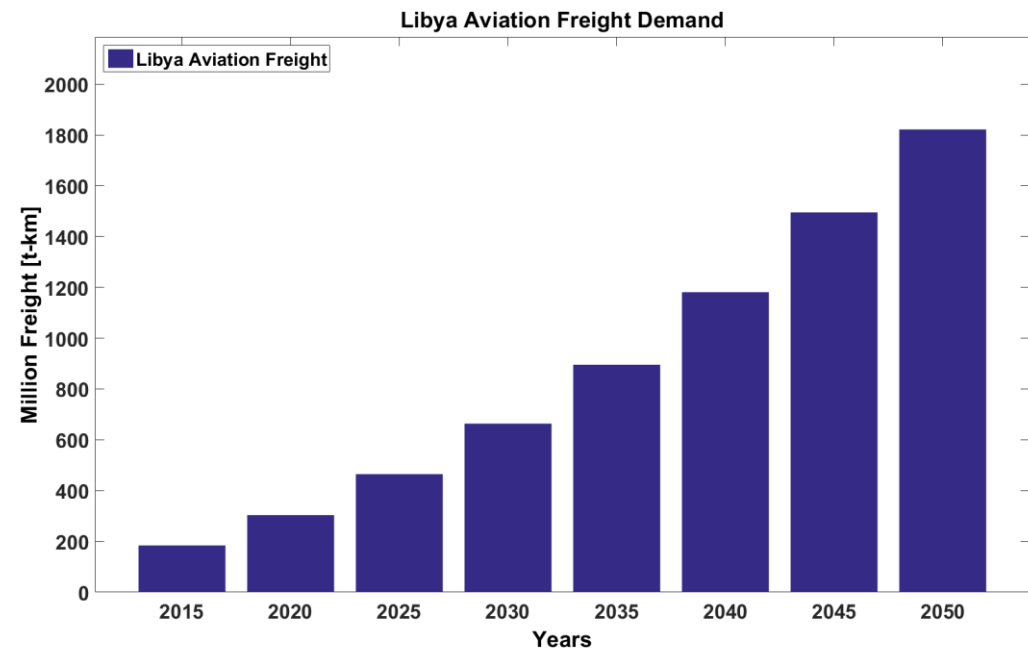

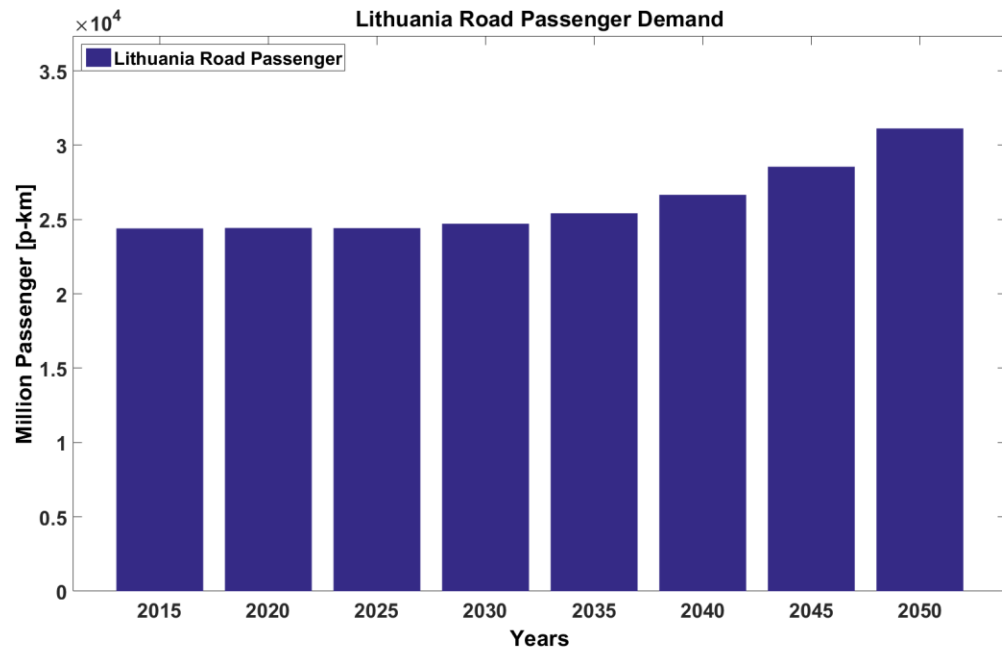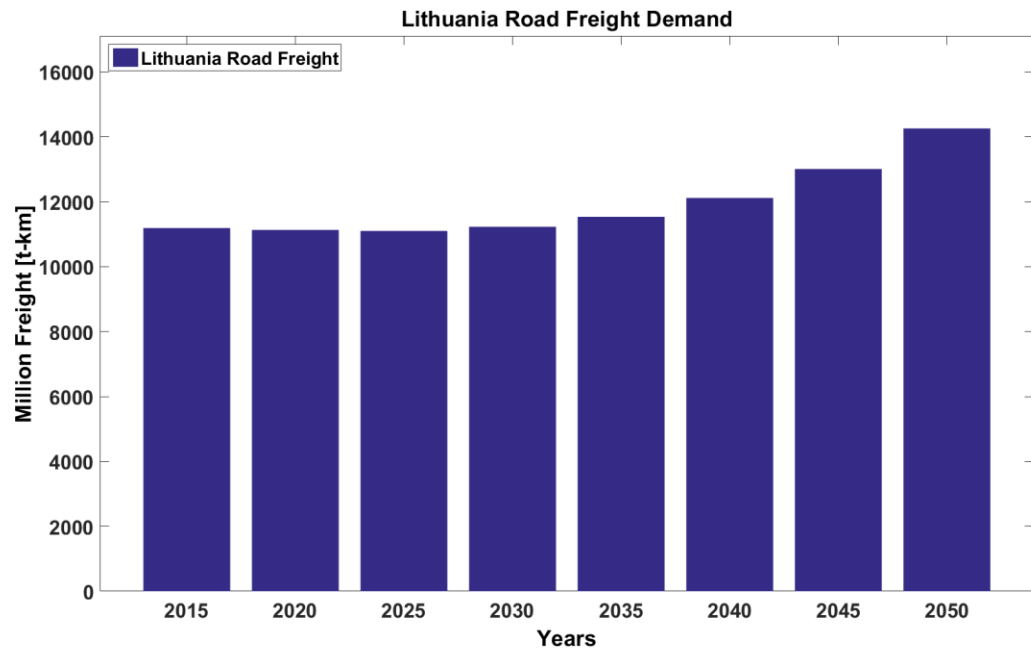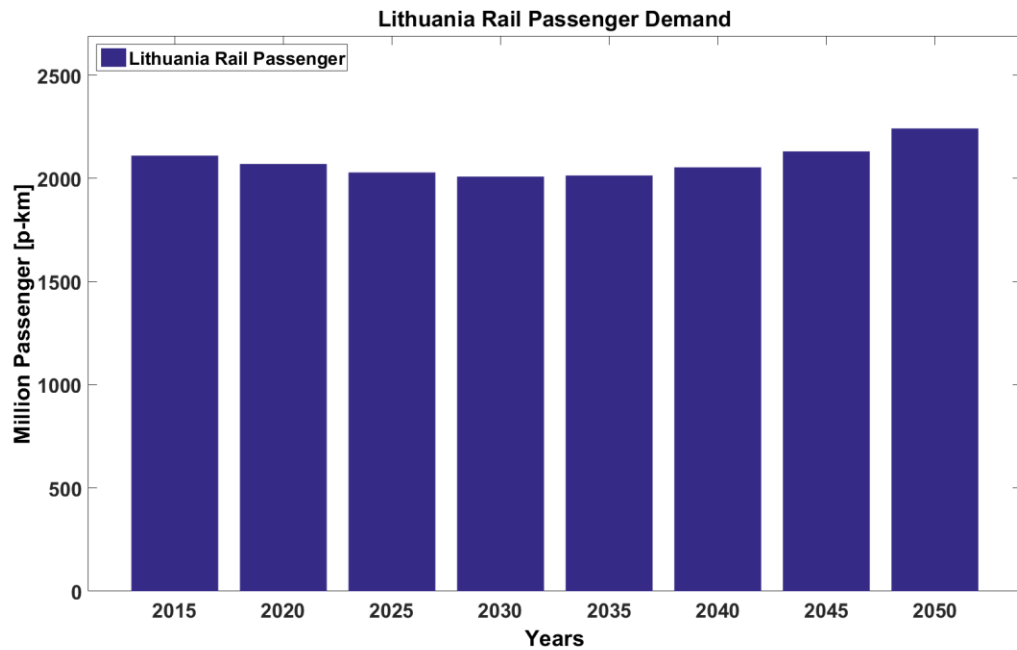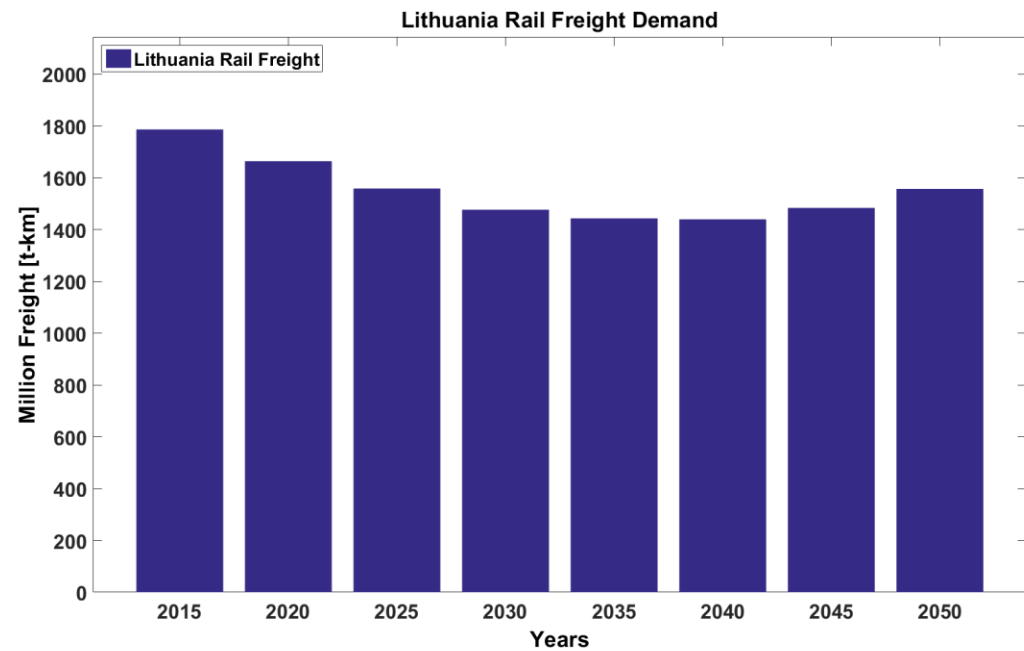

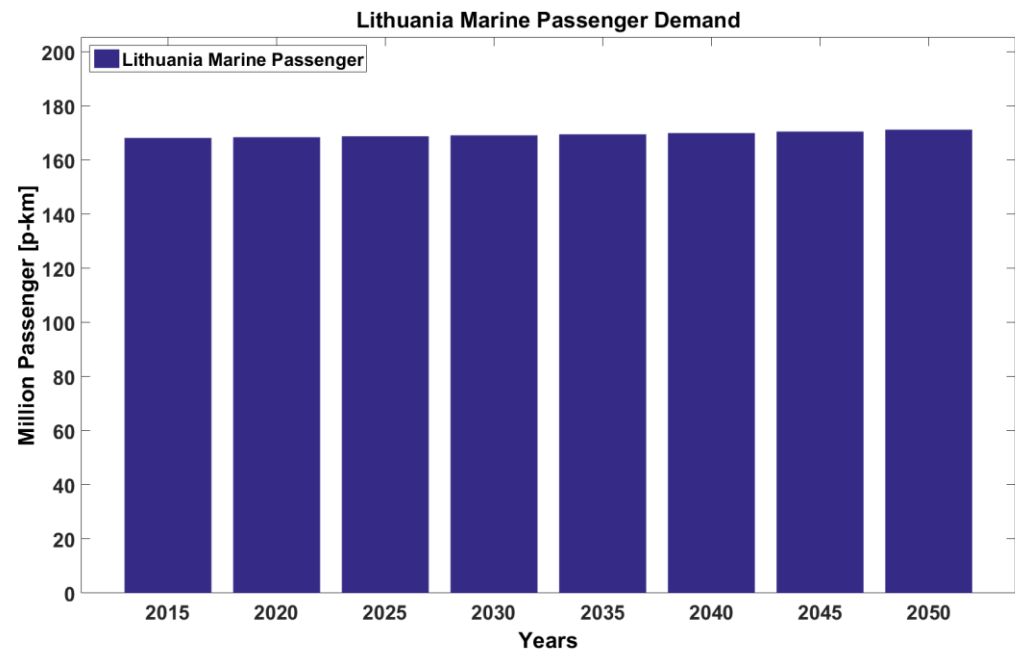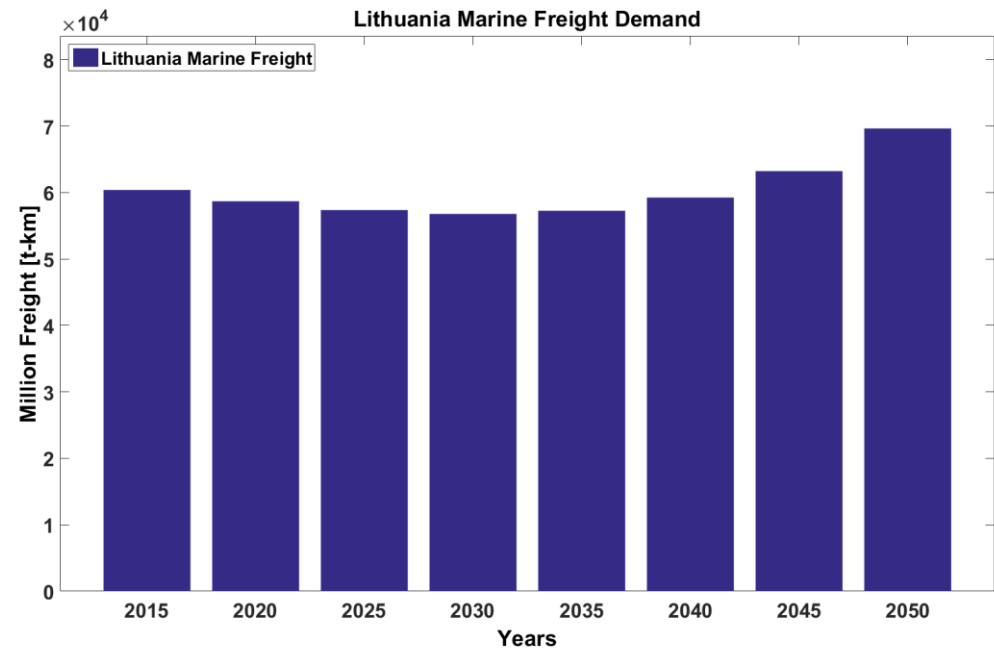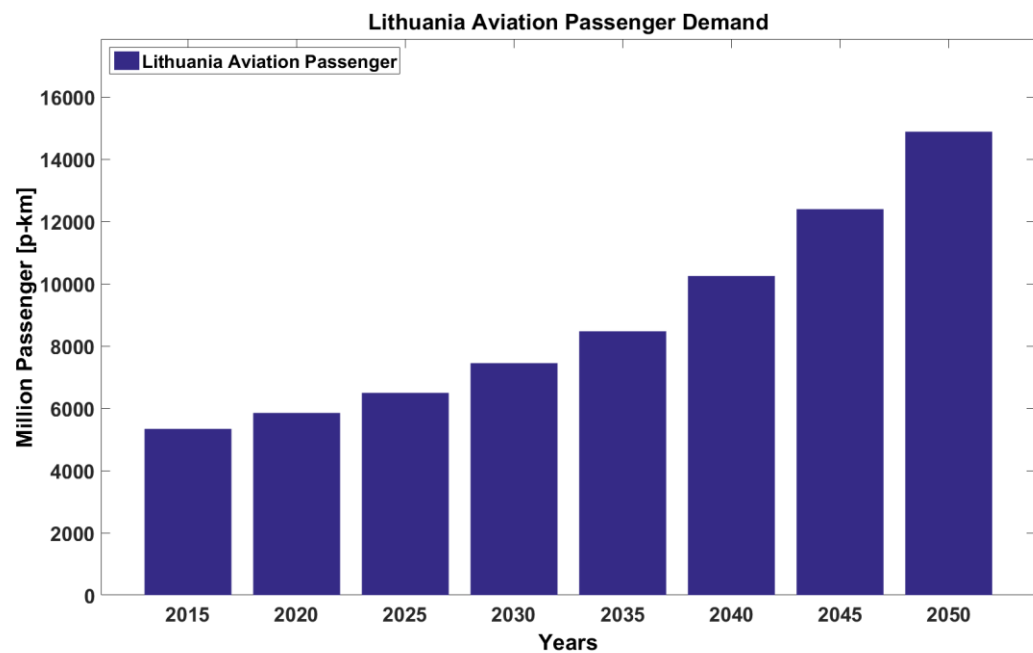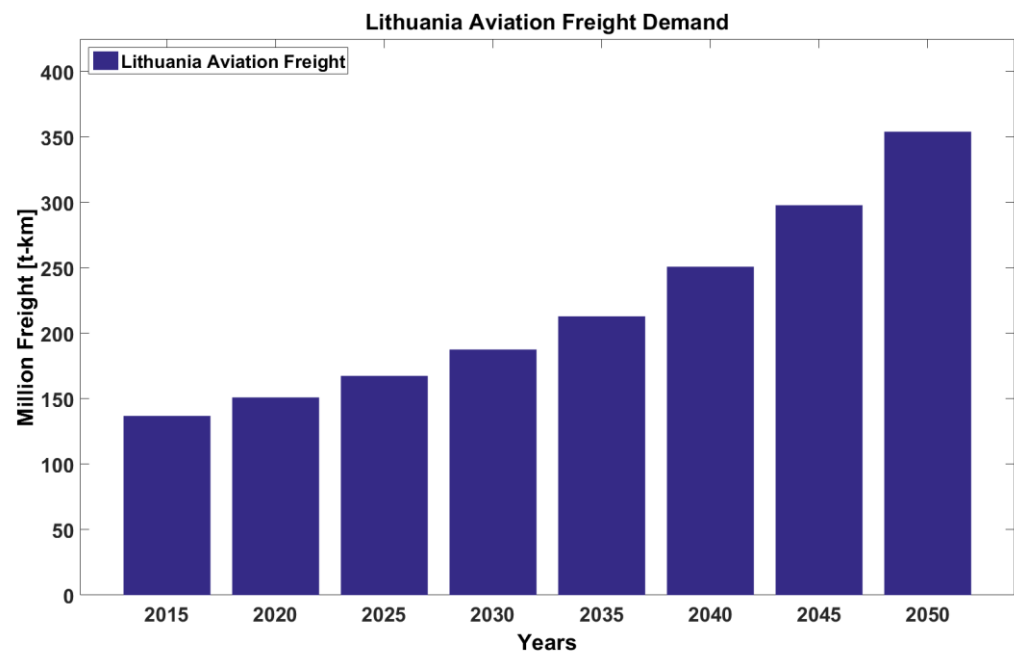

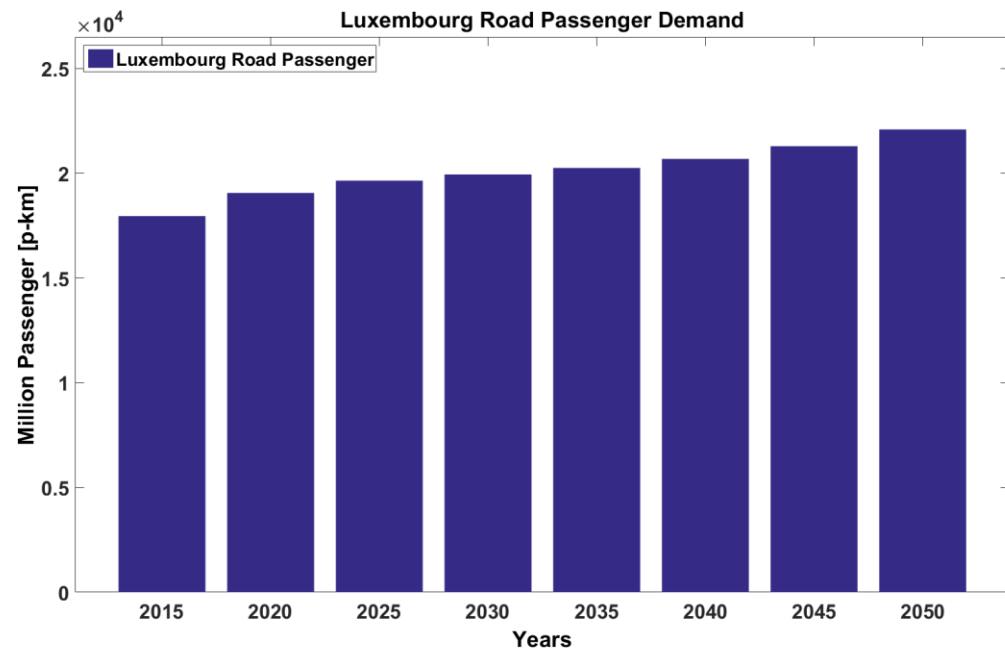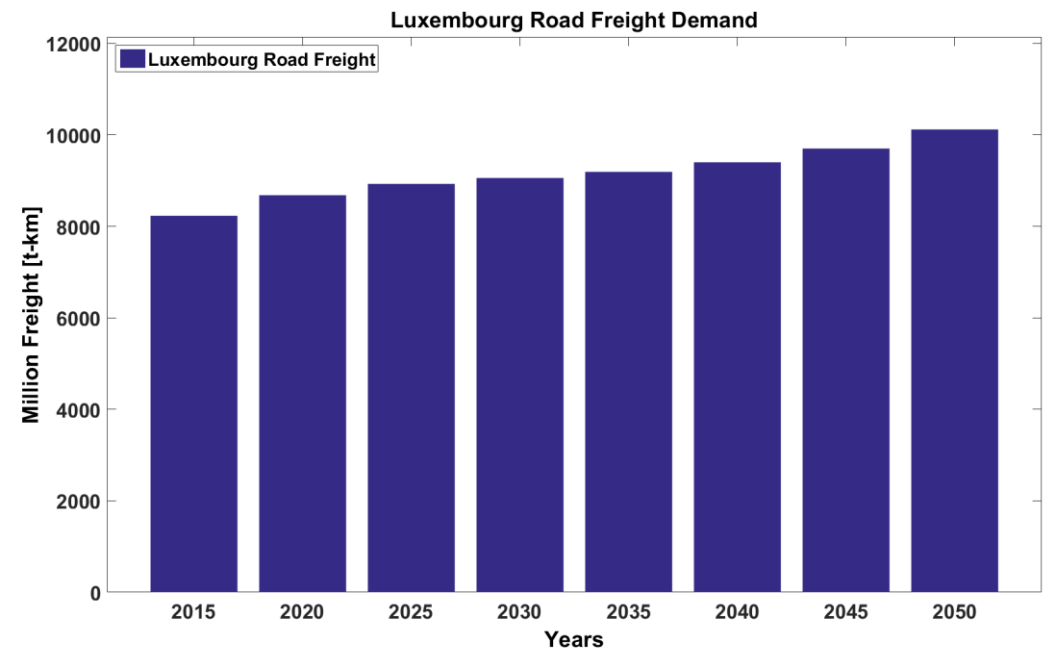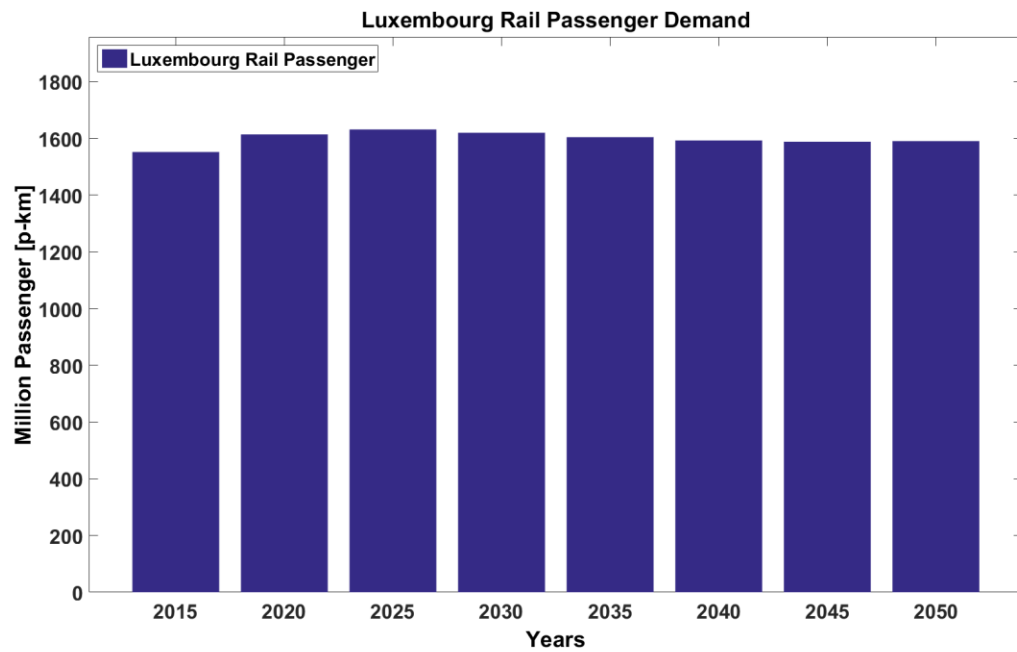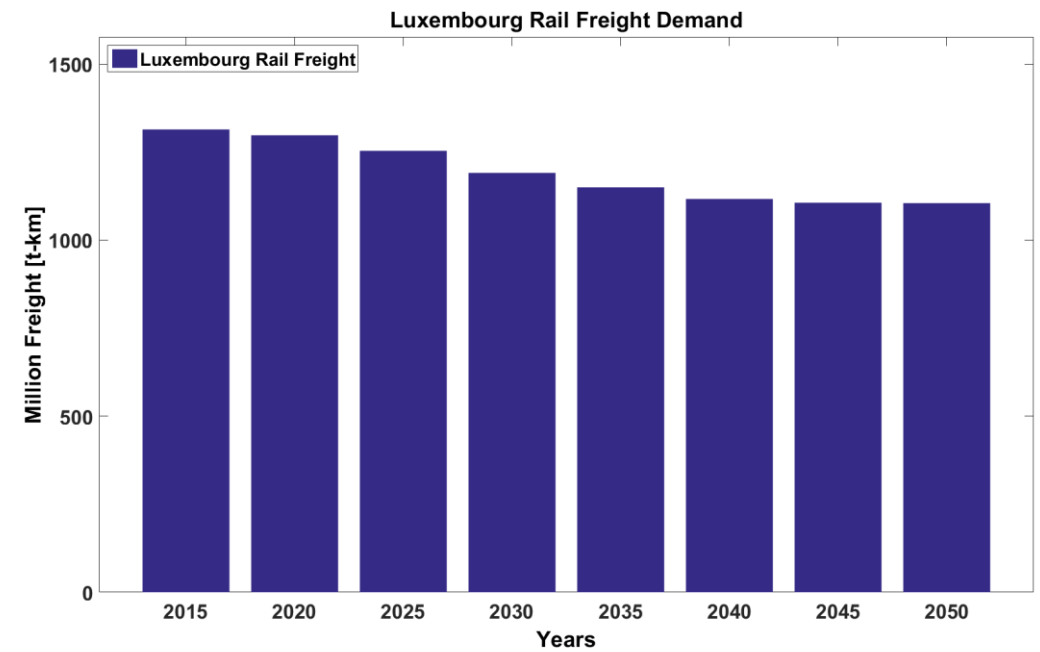

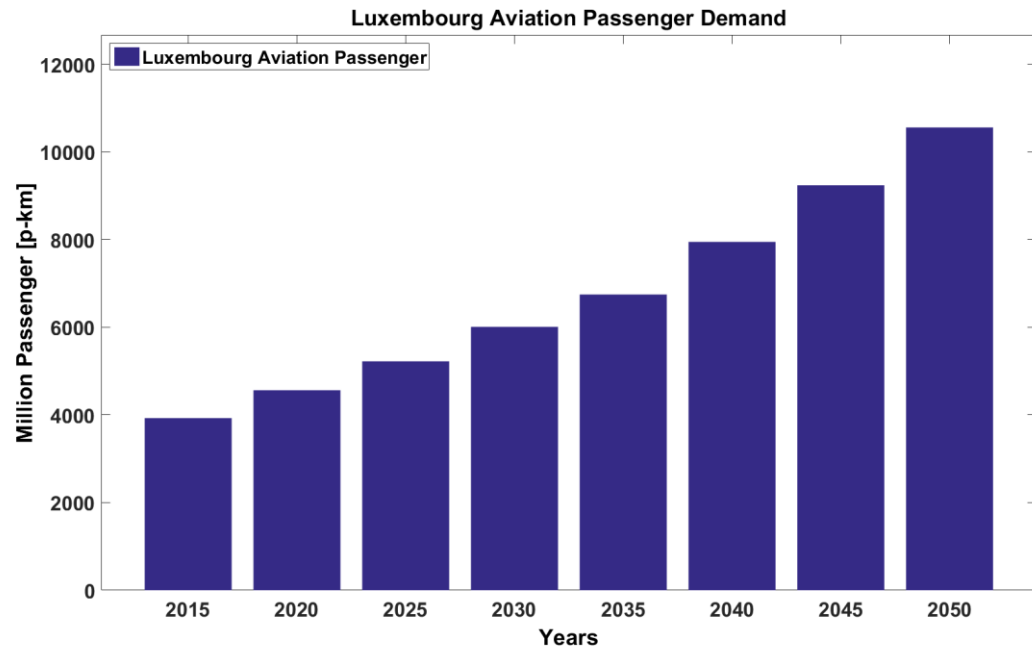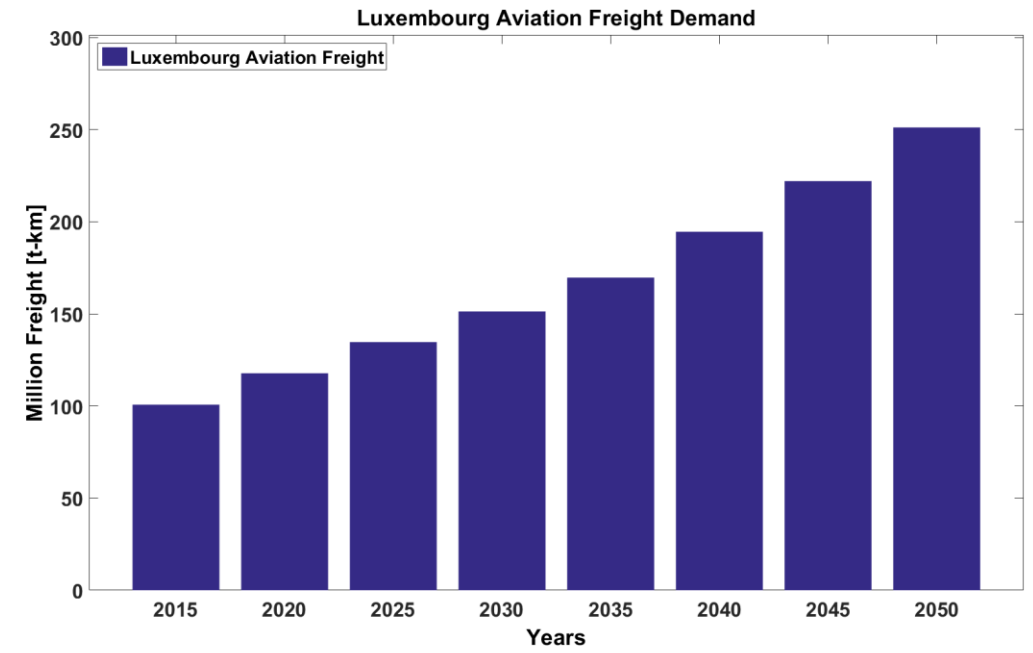

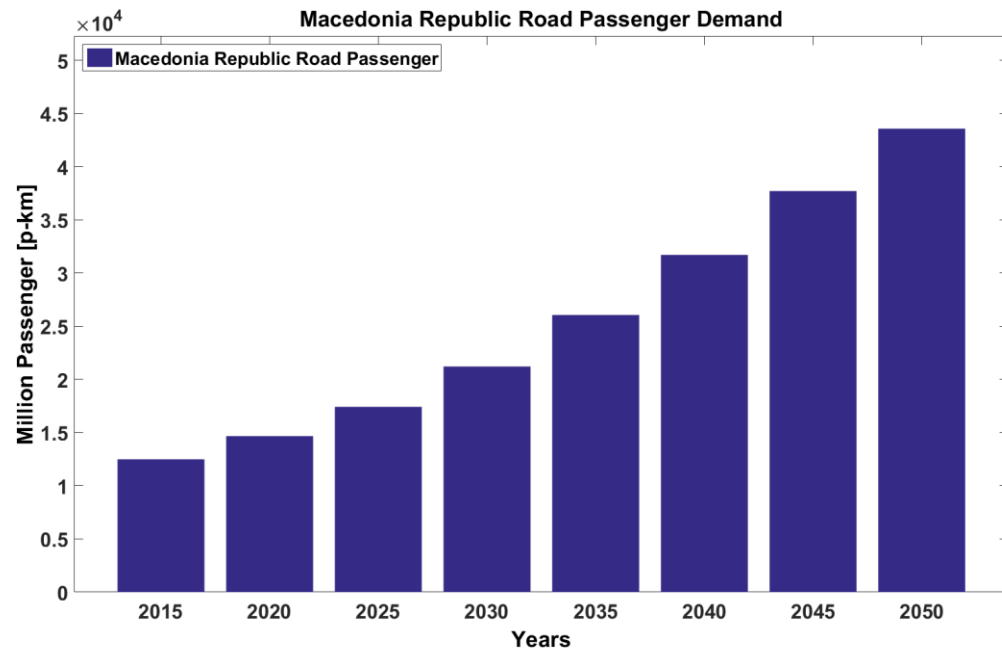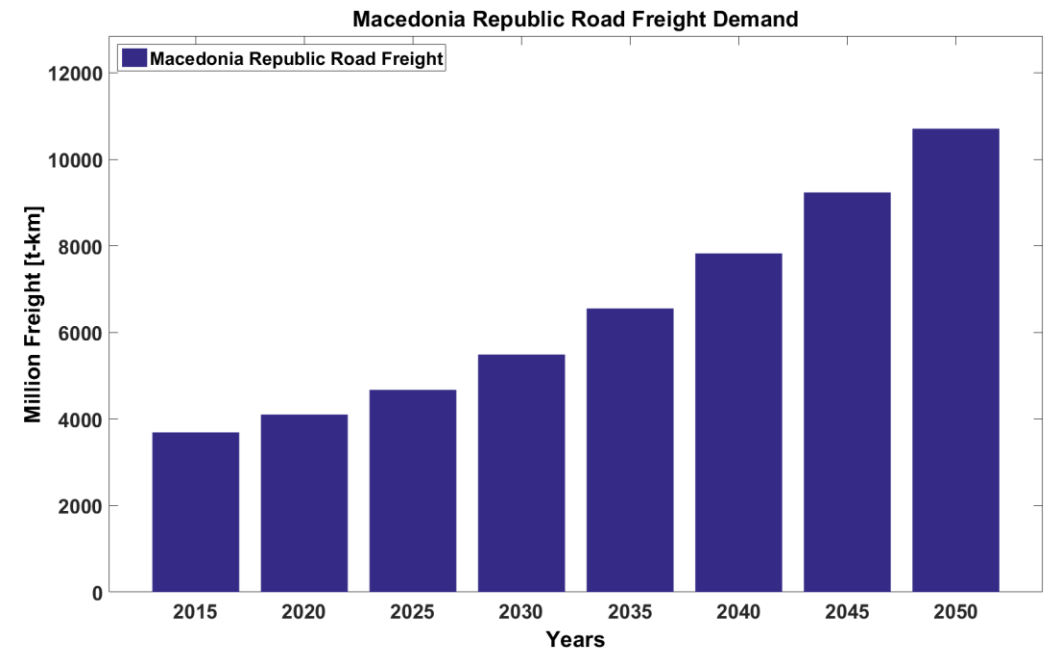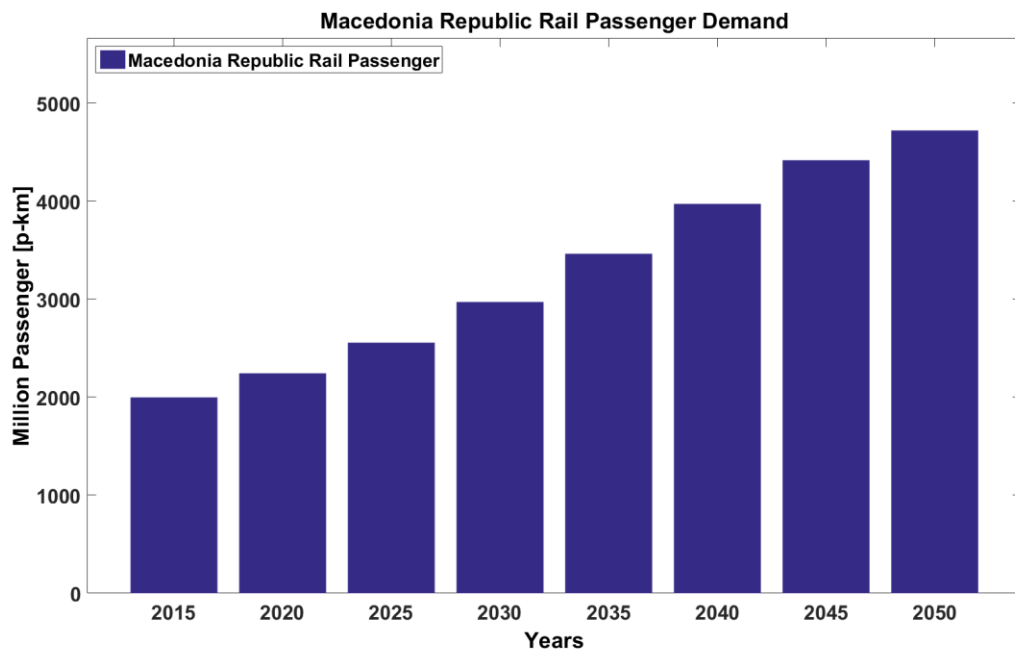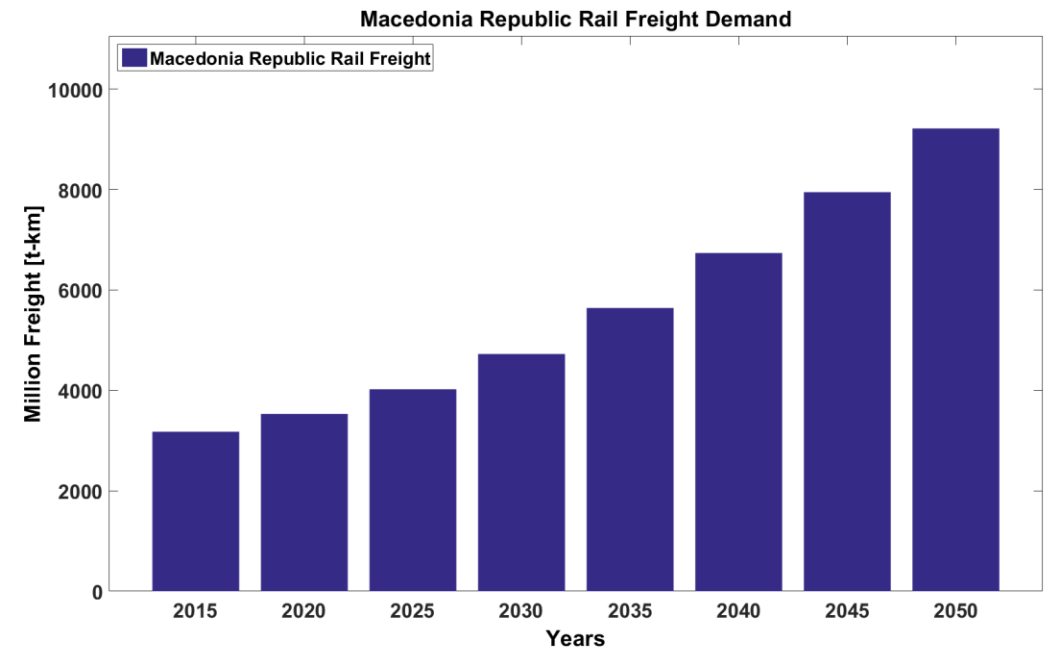

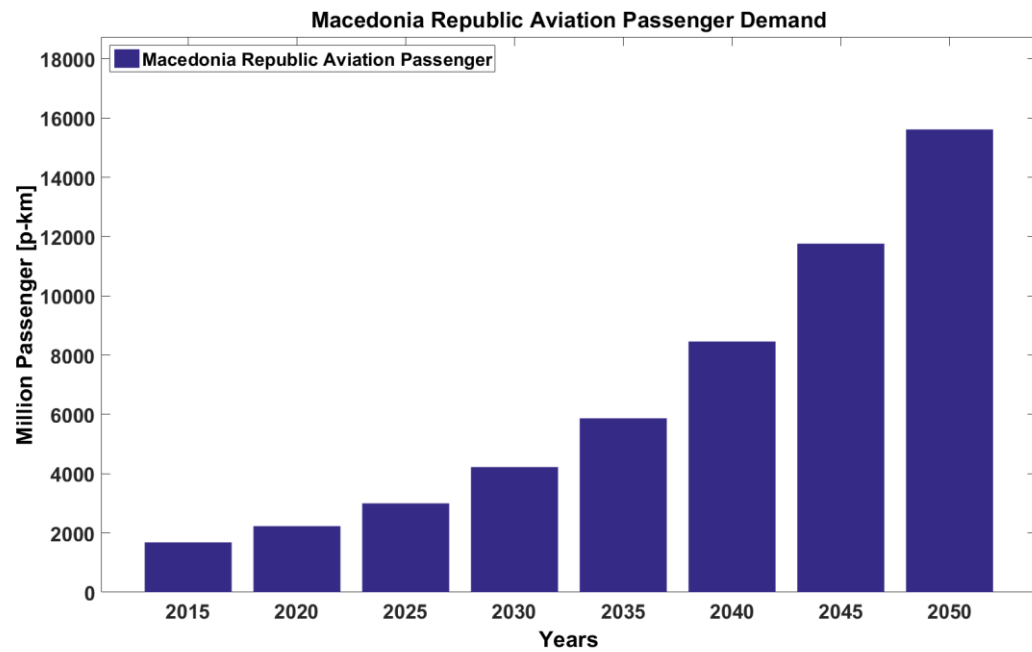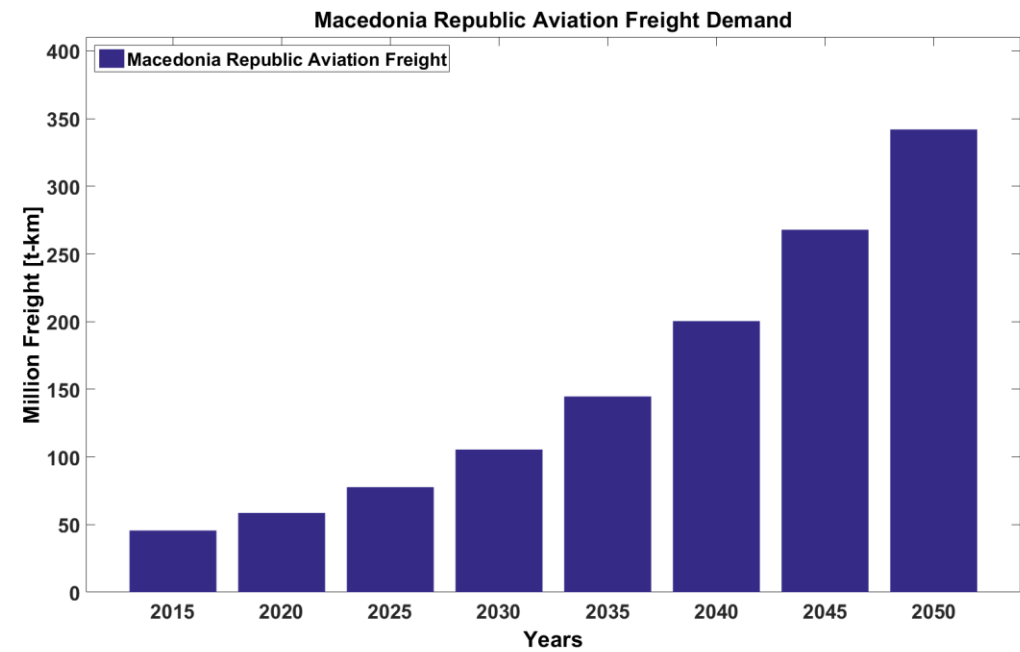

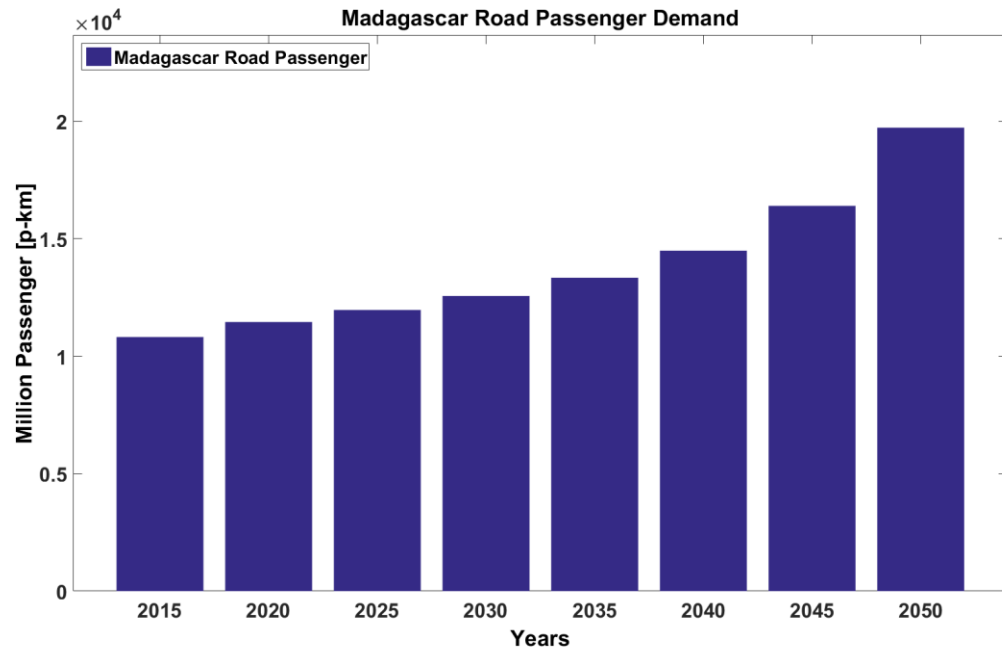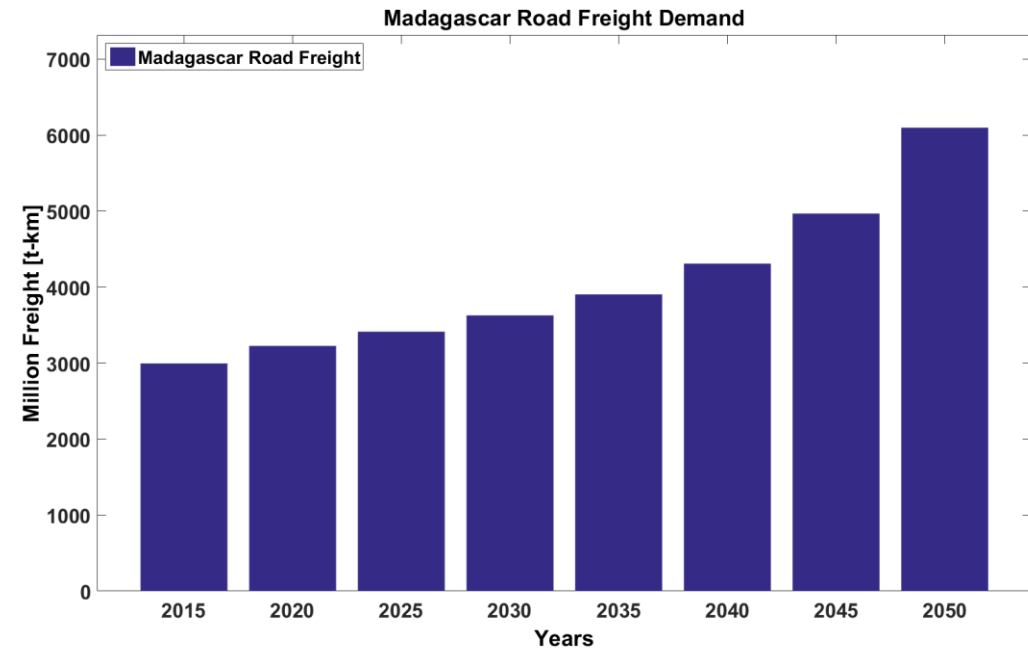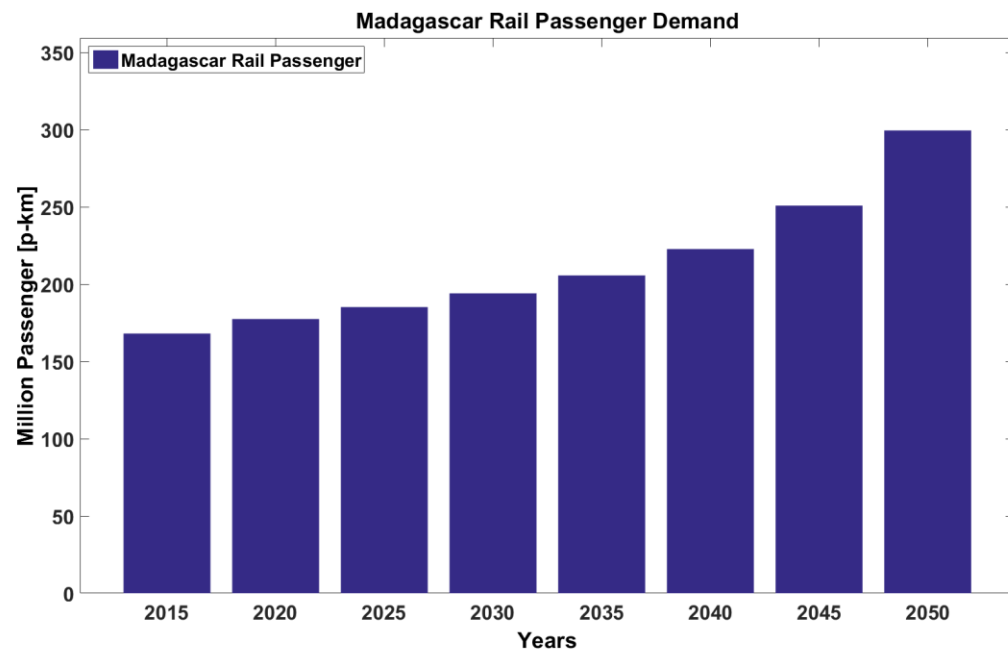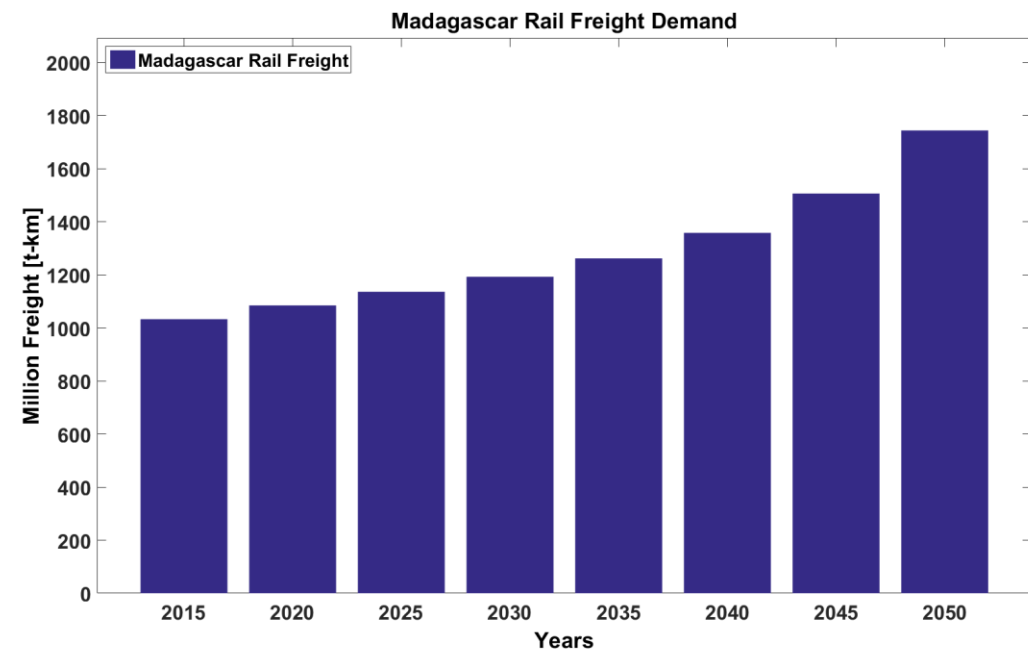

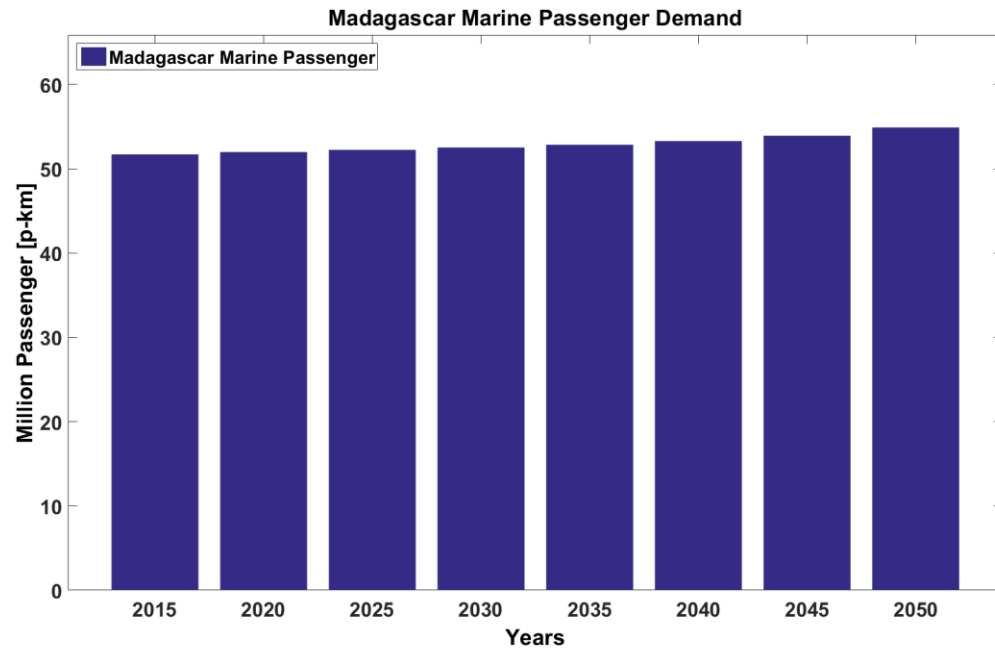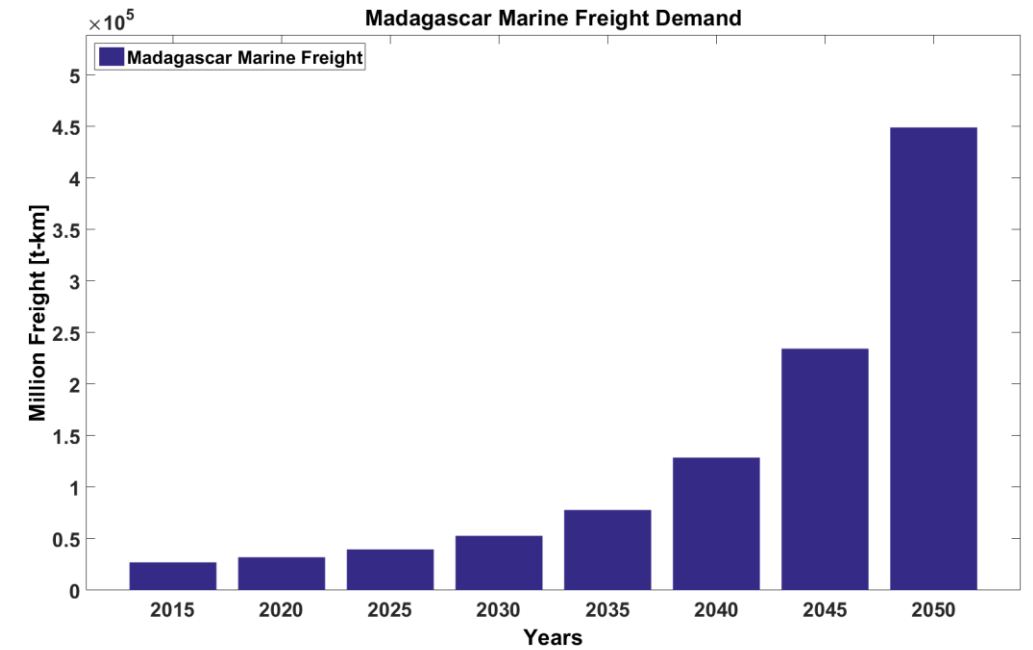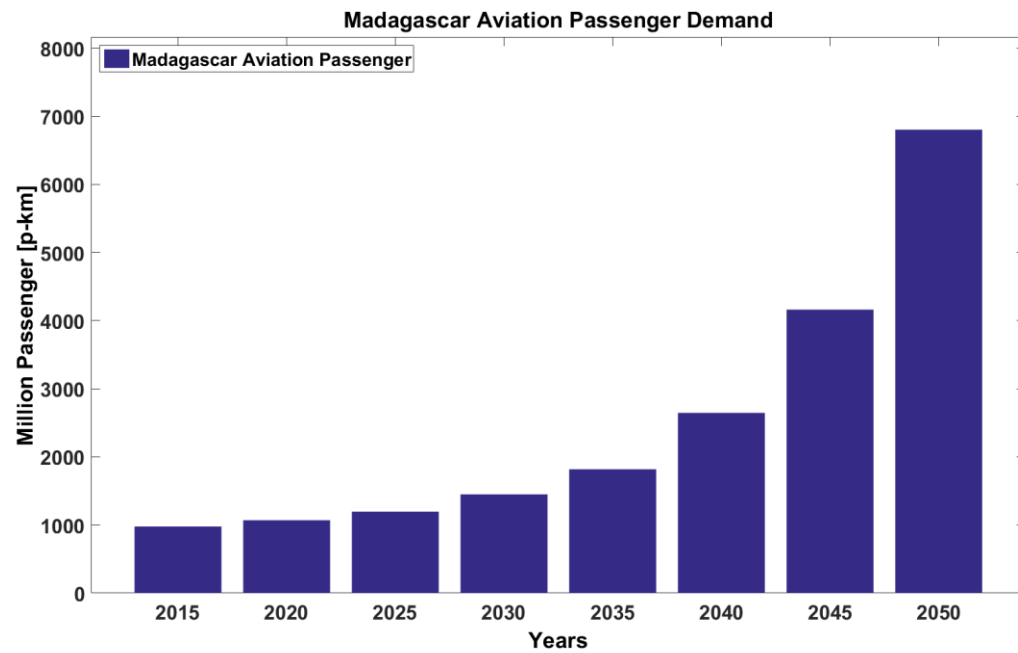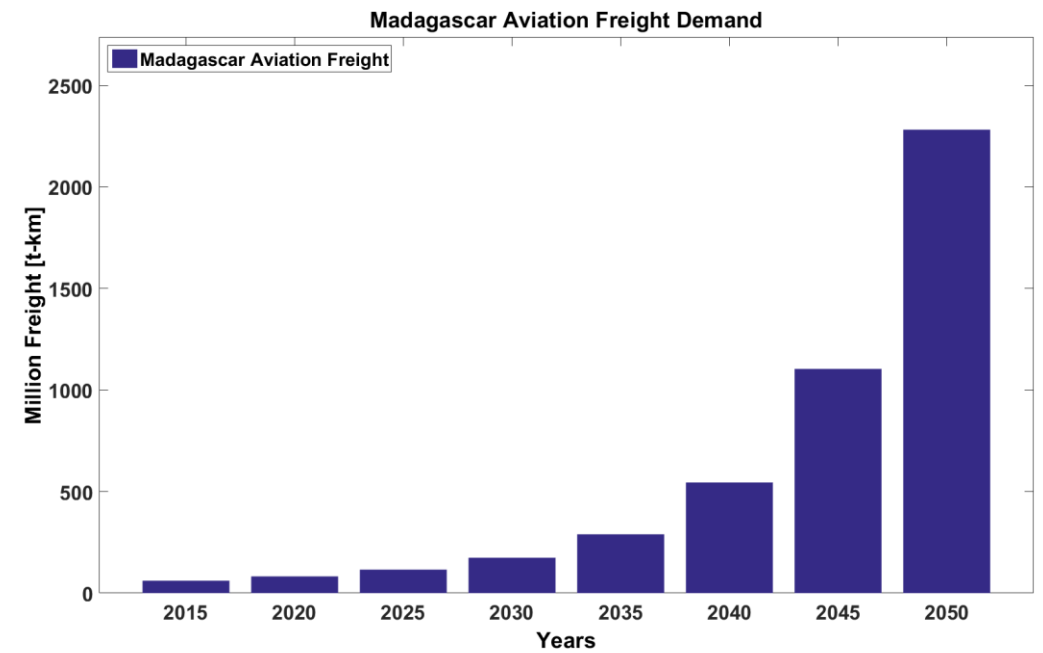

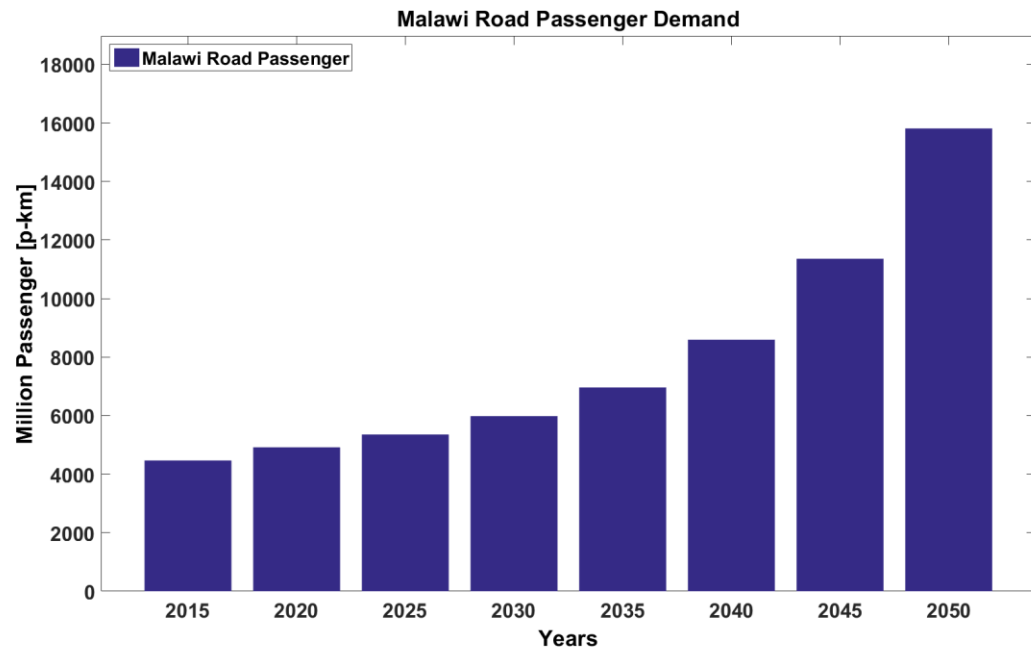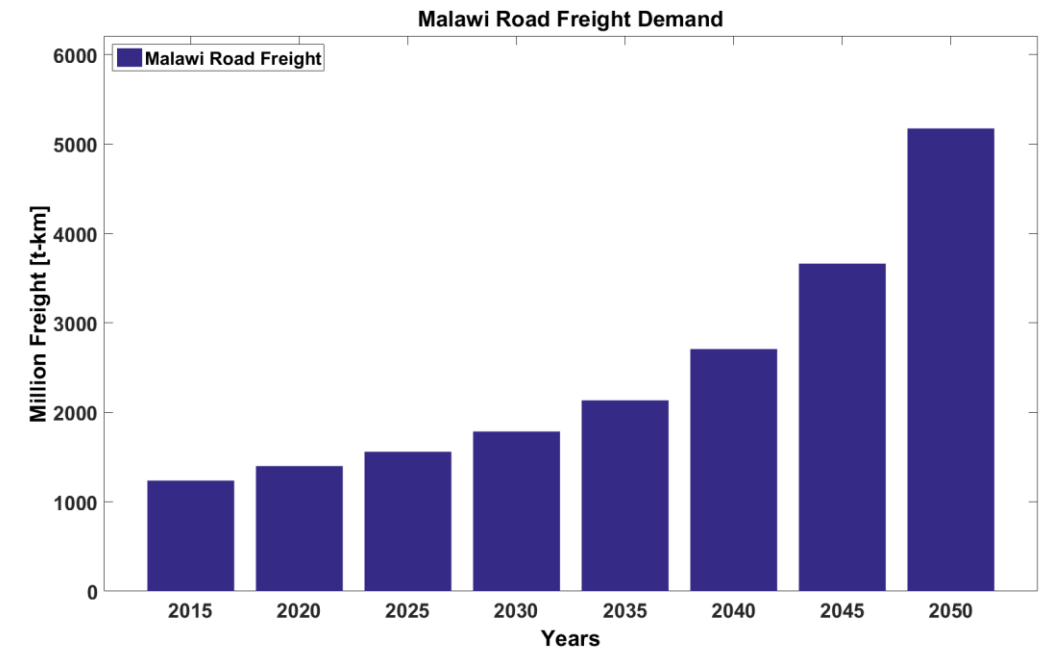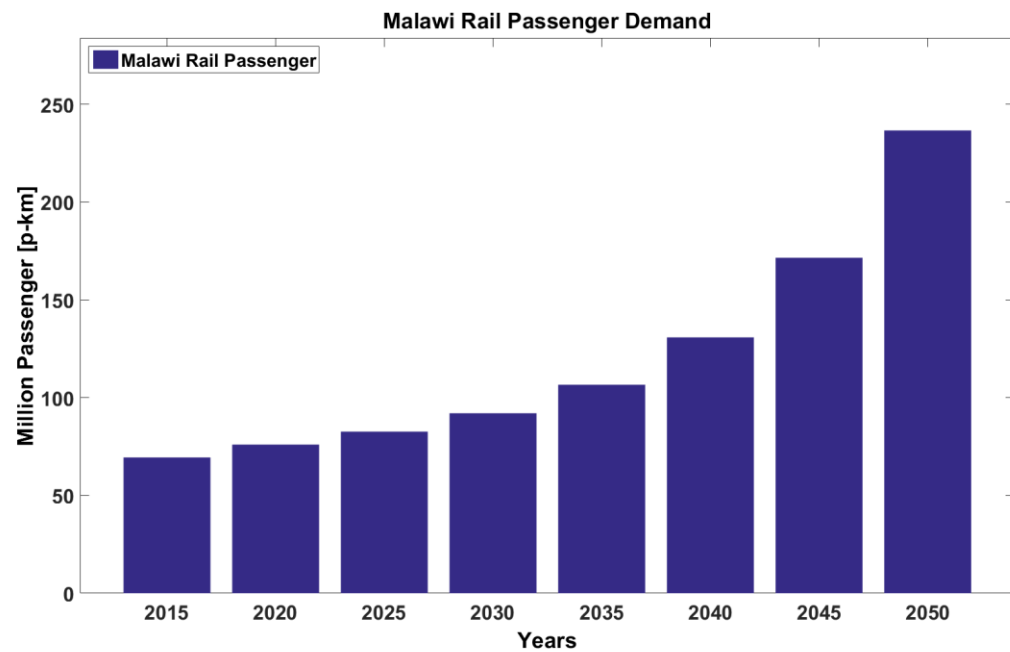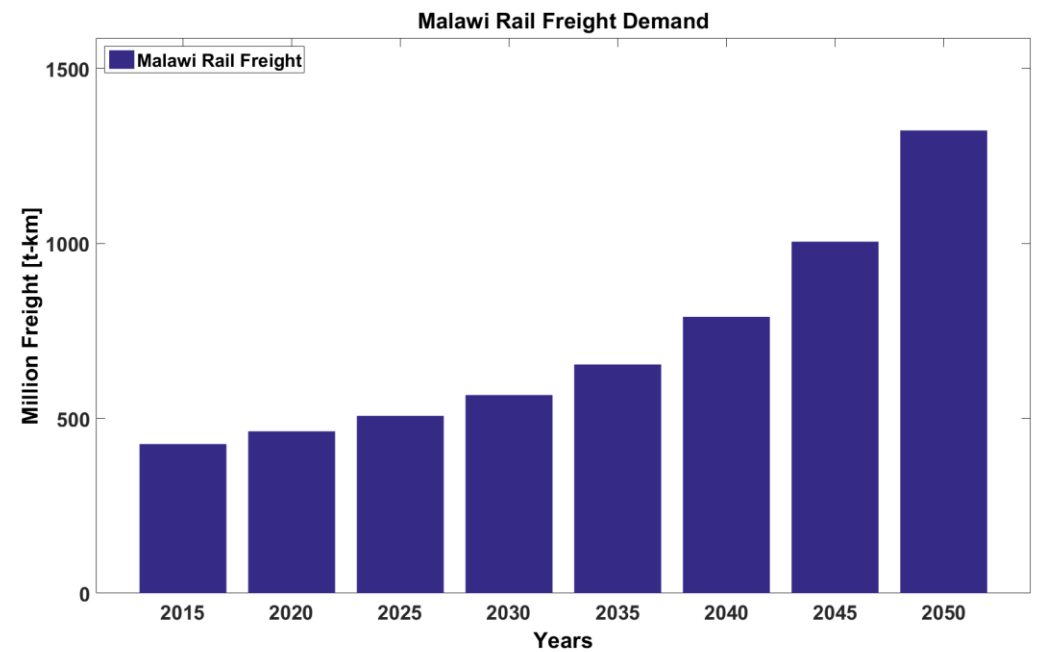

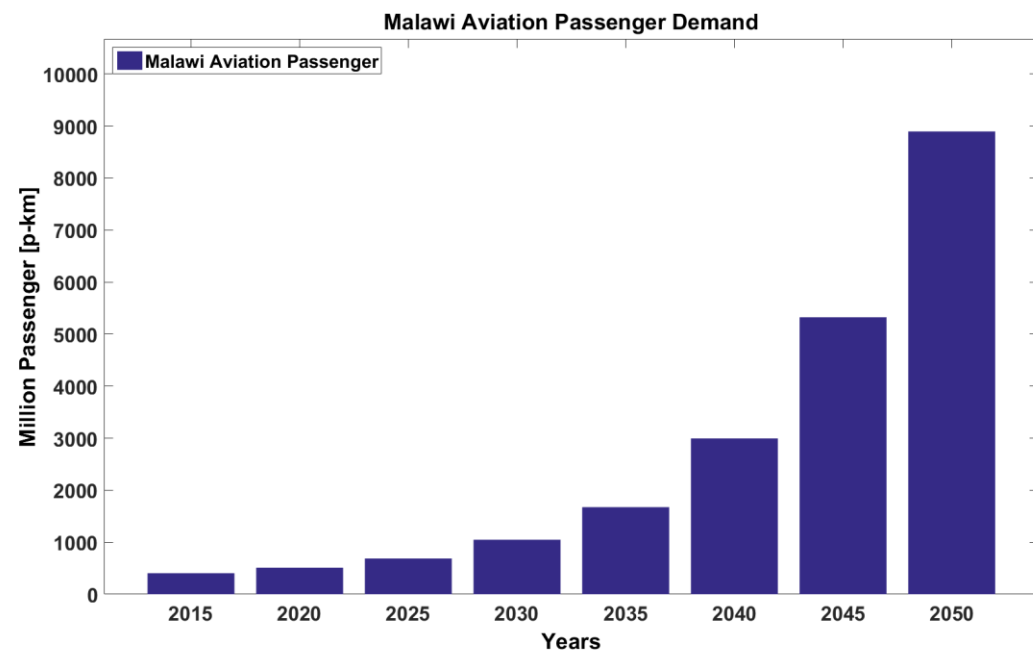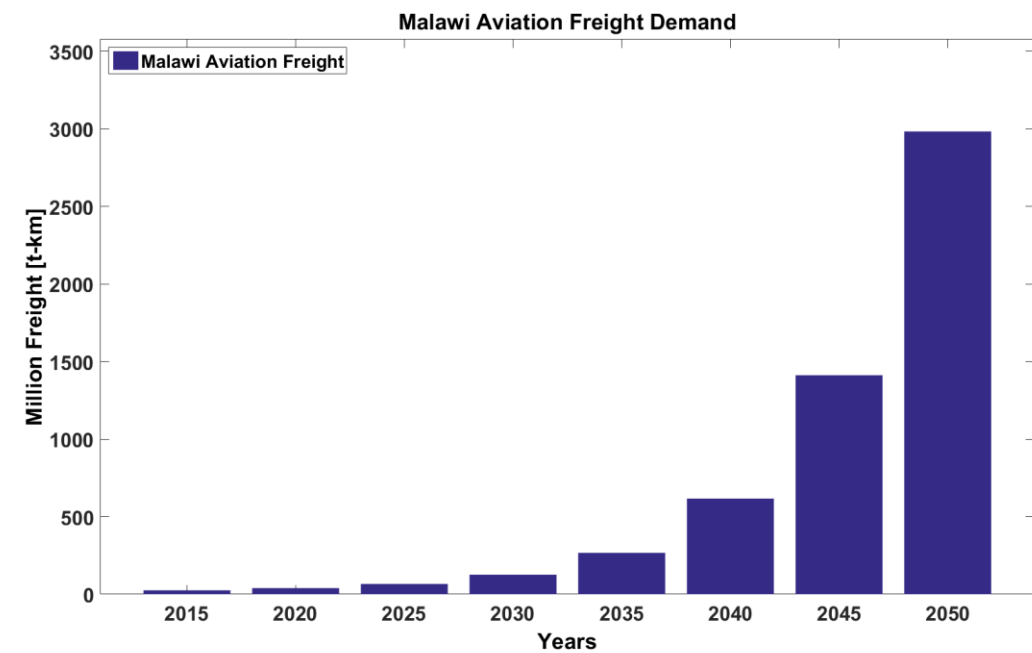

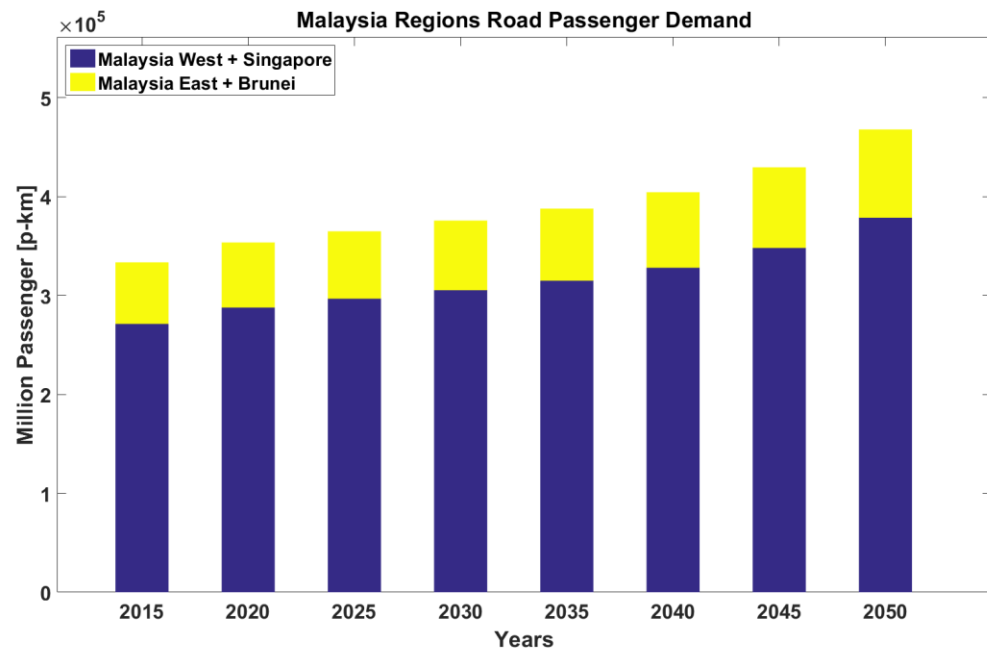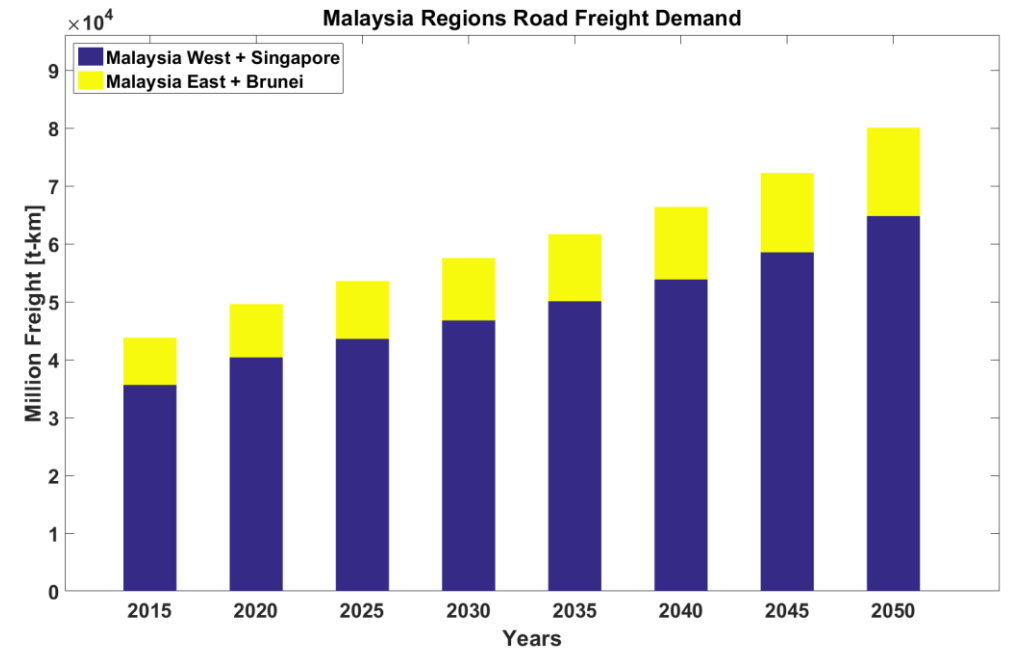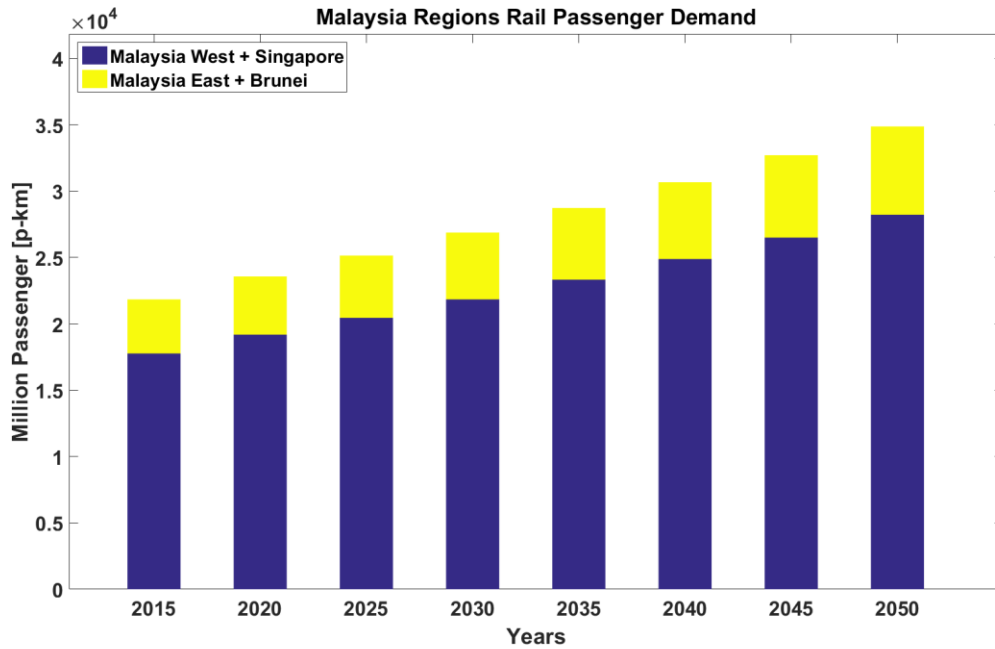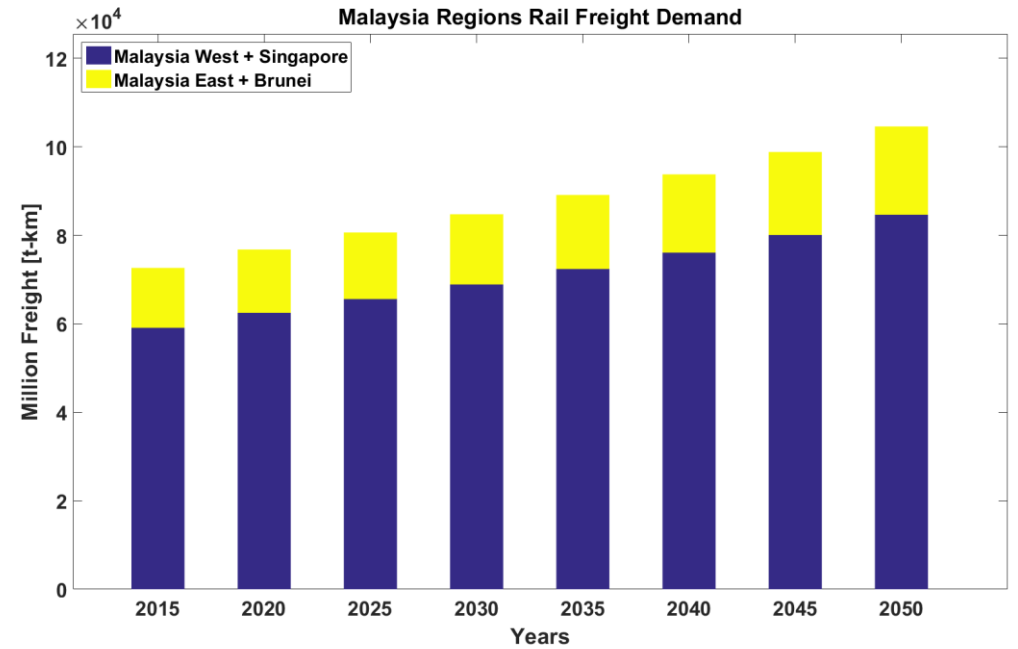

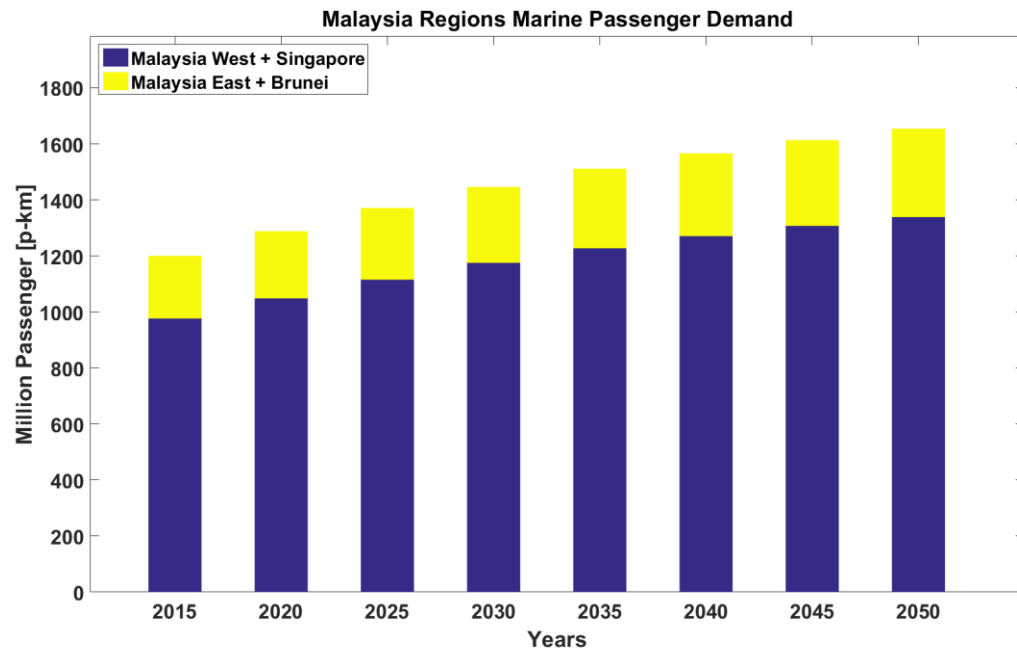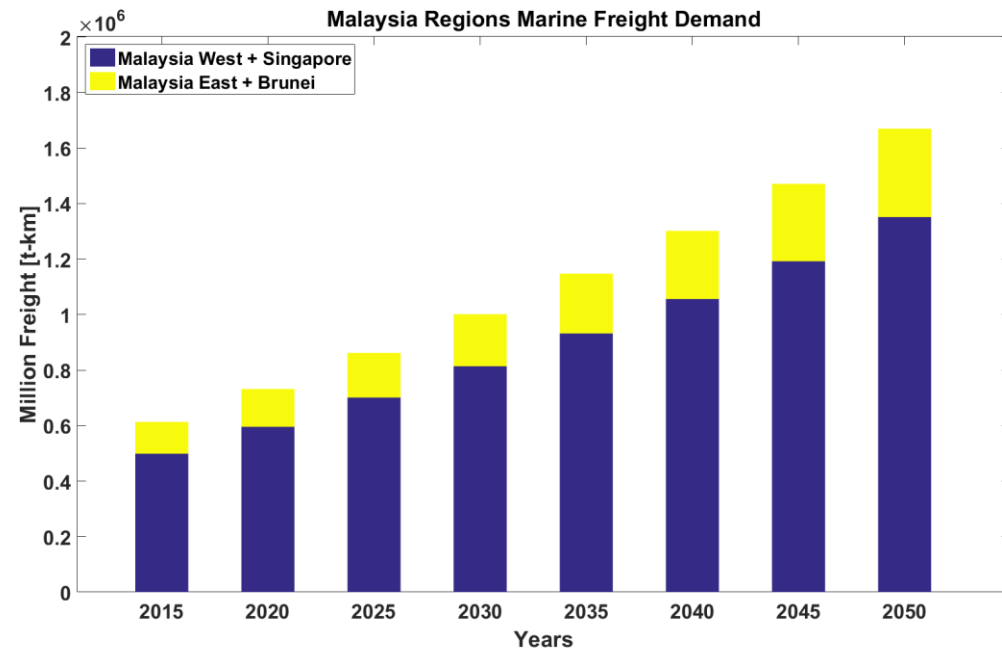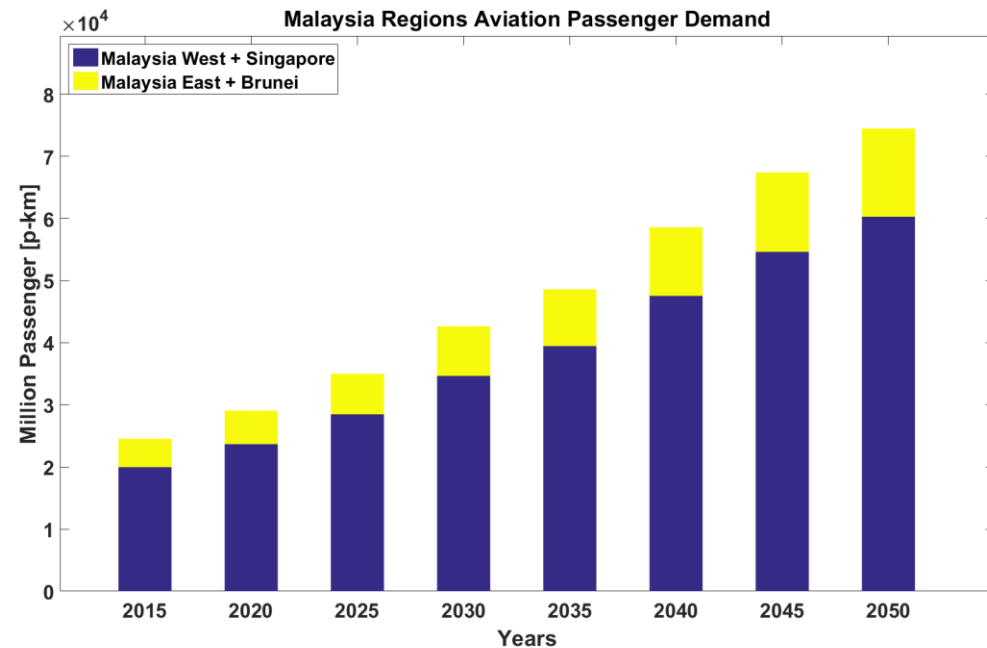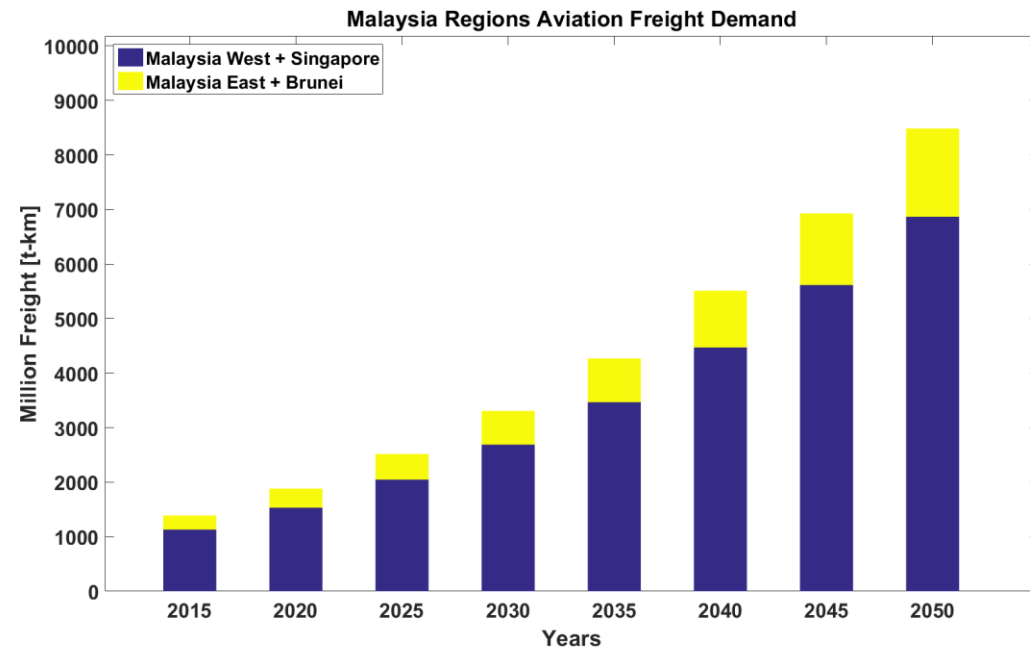

Maldives Road Passenger Demand

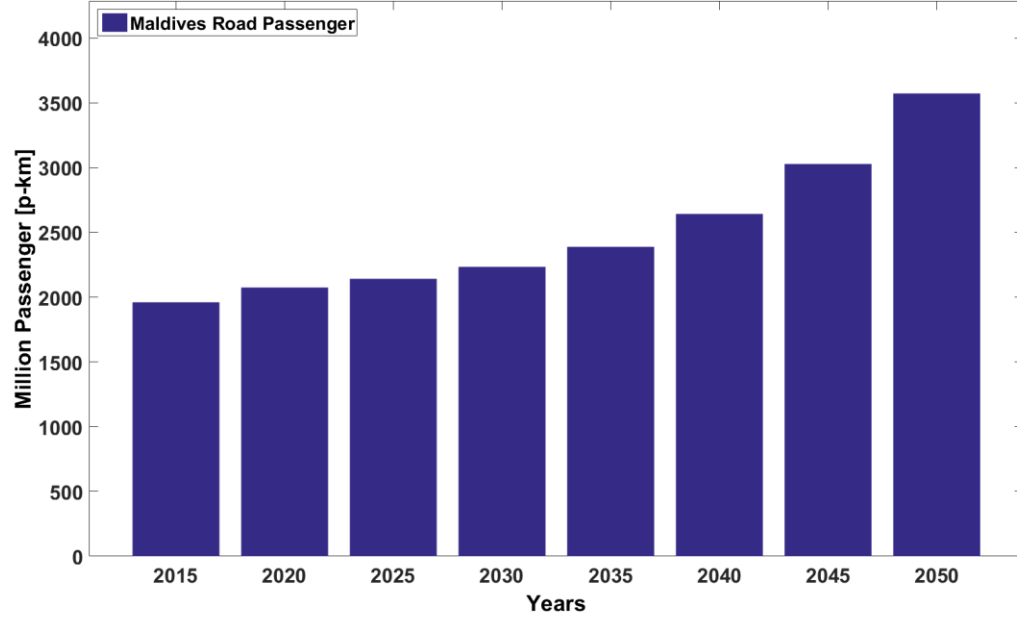

Maldives Road Freight Demand

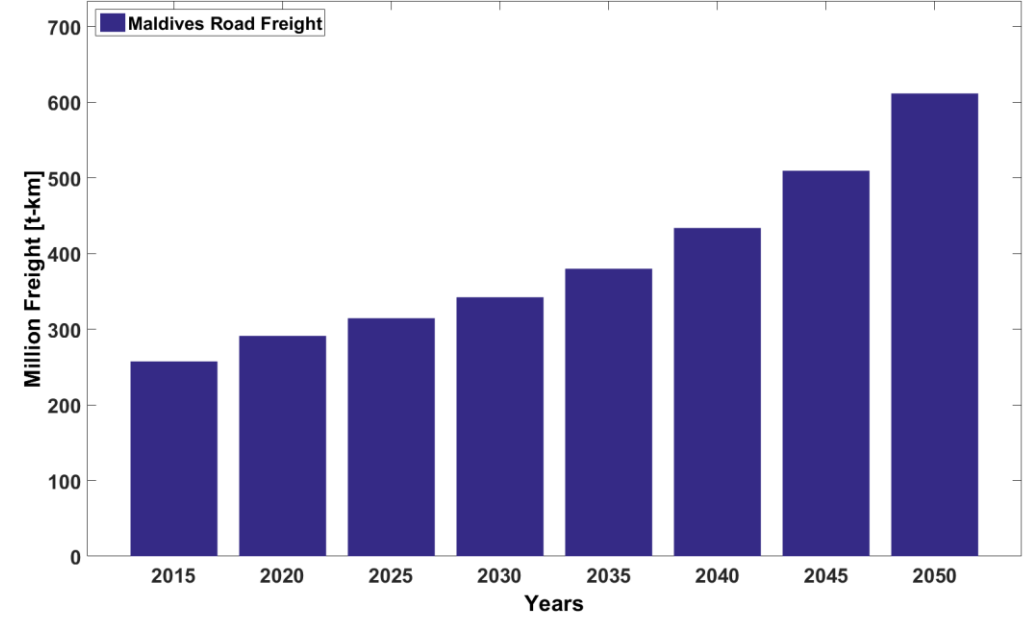

Maldives Rail Passenger Demand

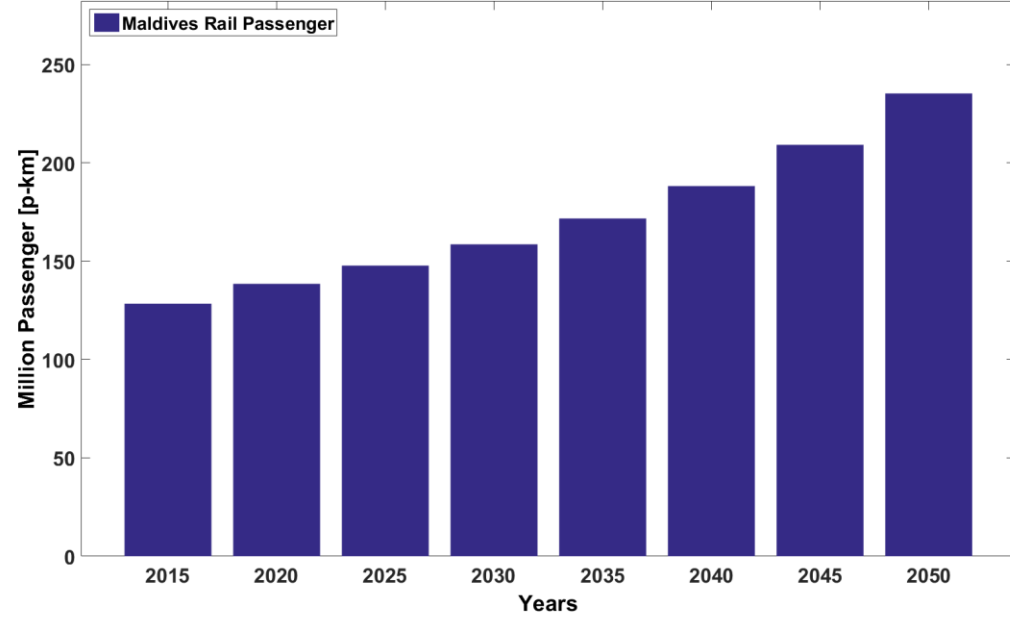

Maldives Rail Freight Demand

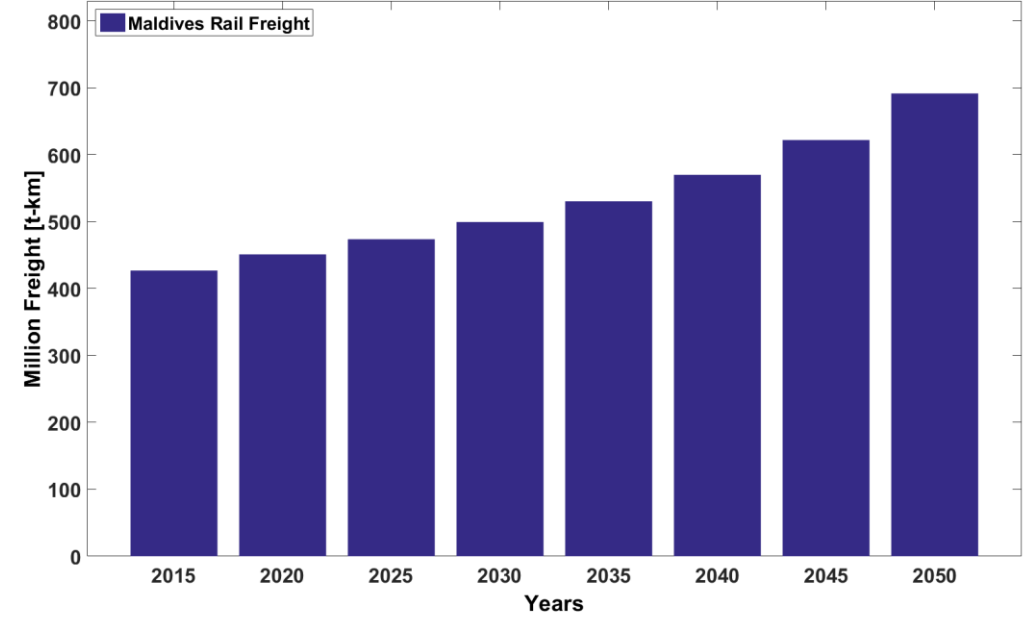

**Maldives Marine Passenger Demand**

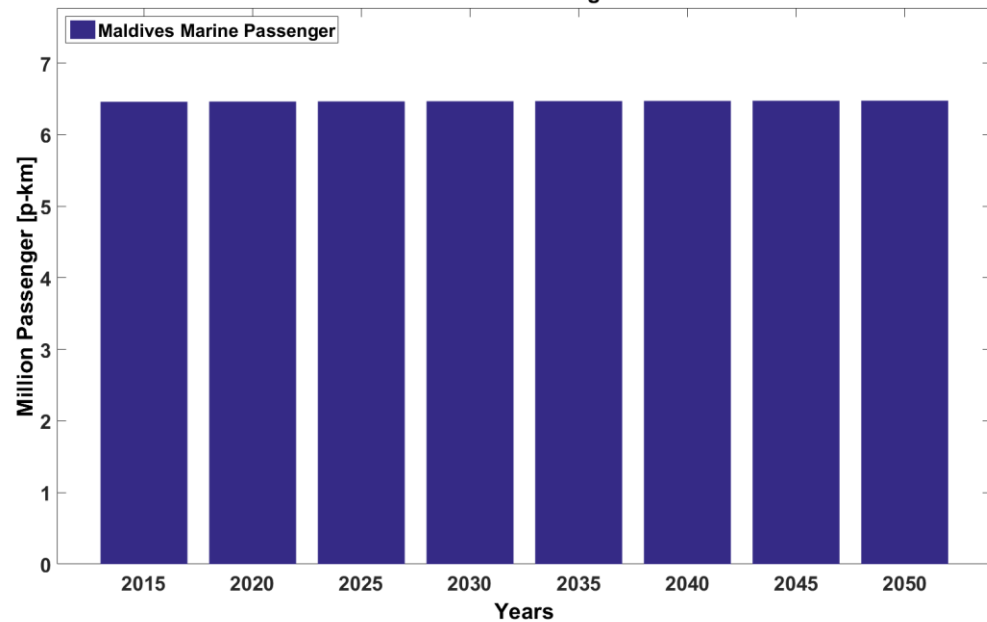

**Maldives Marine Freight Demand**

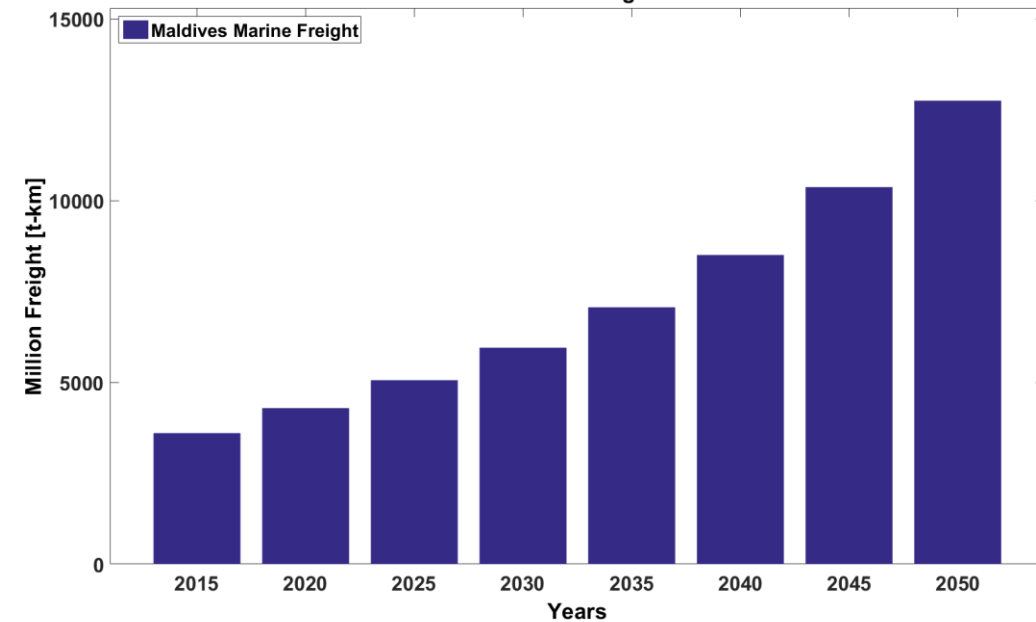

**Maldives Aviation Passenger Demand**

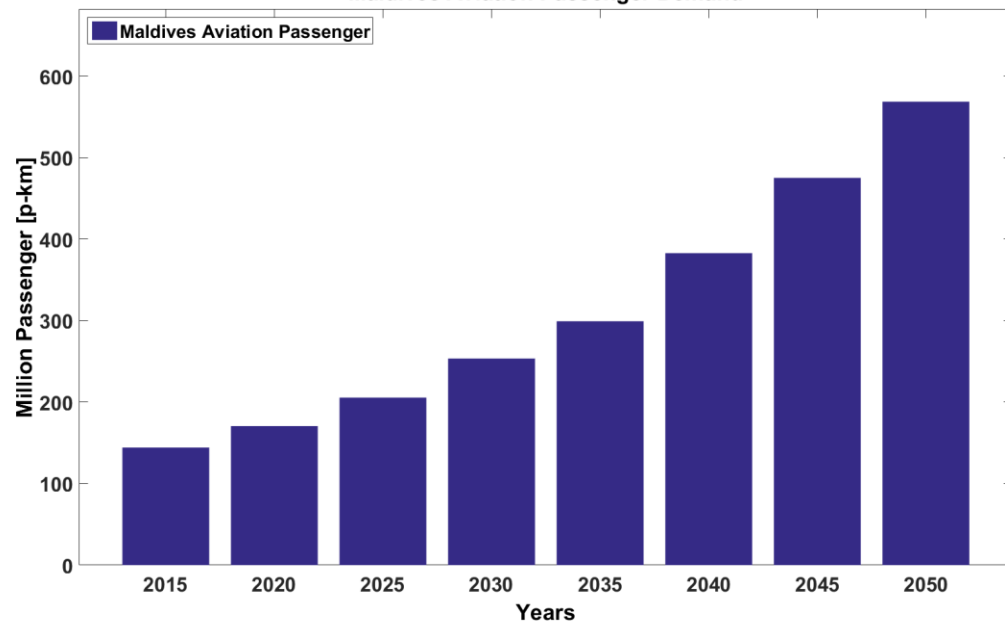

**Maldives Aviation Freight Demand**

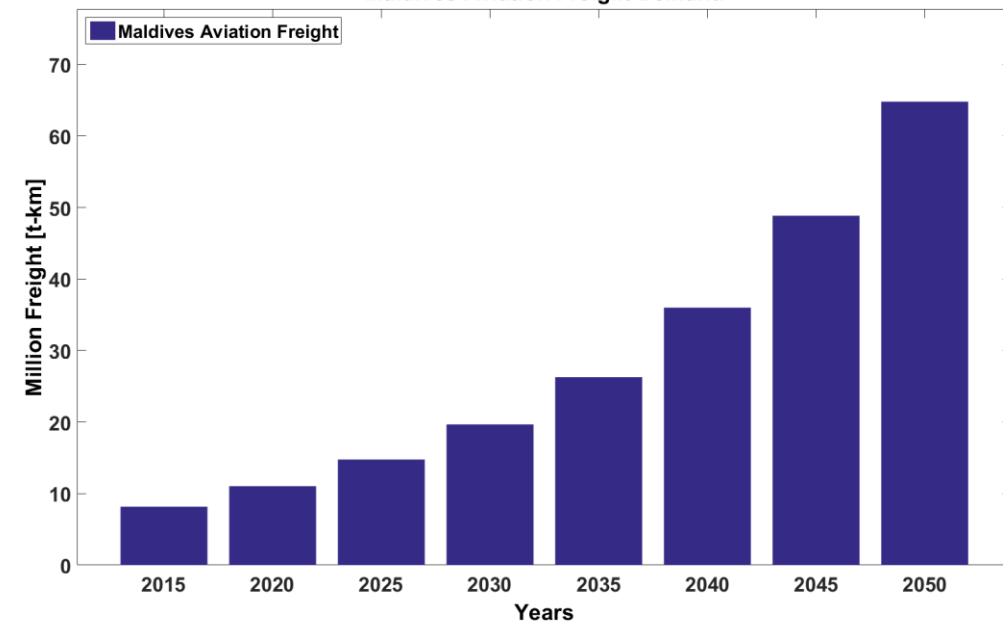

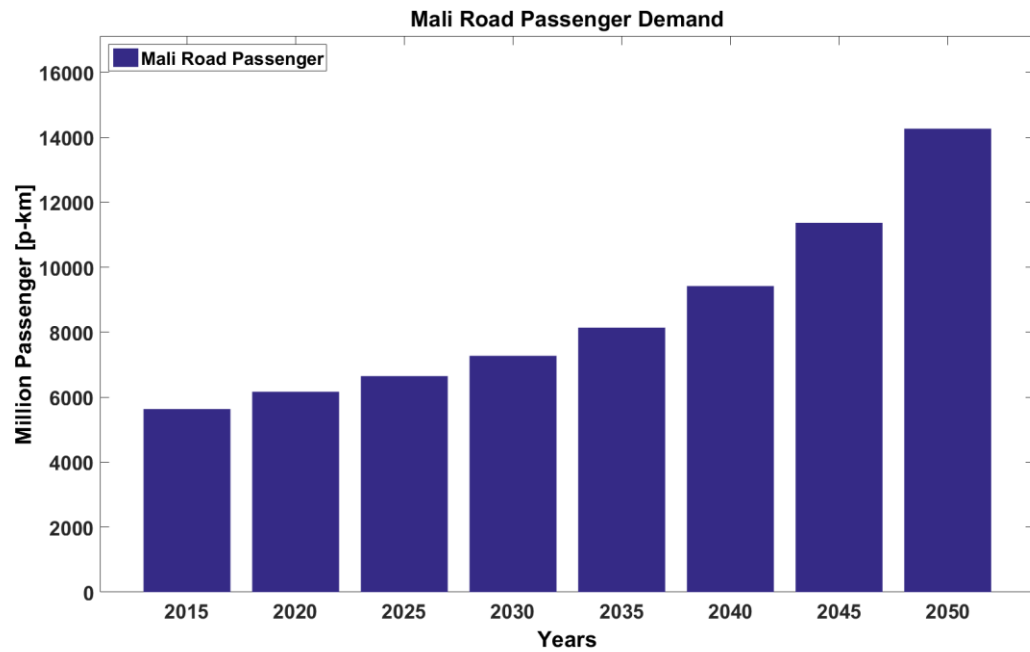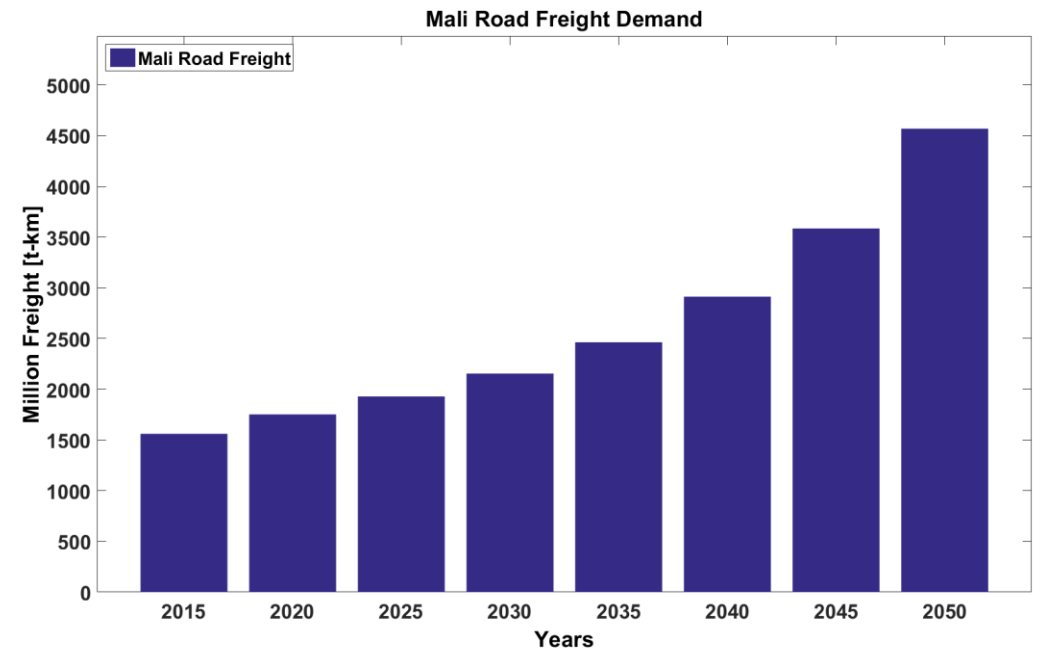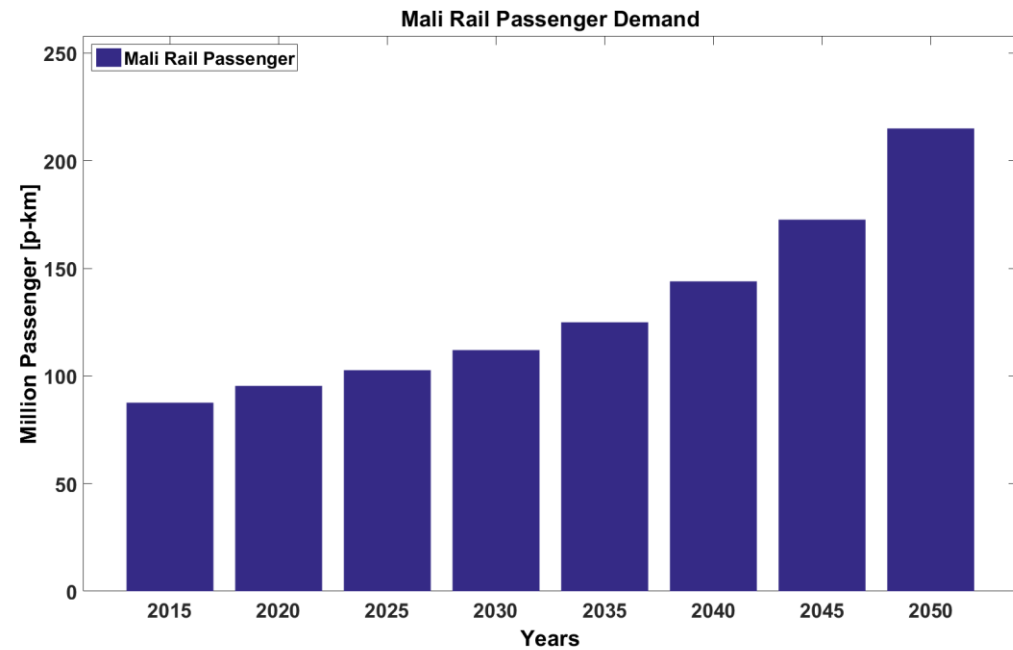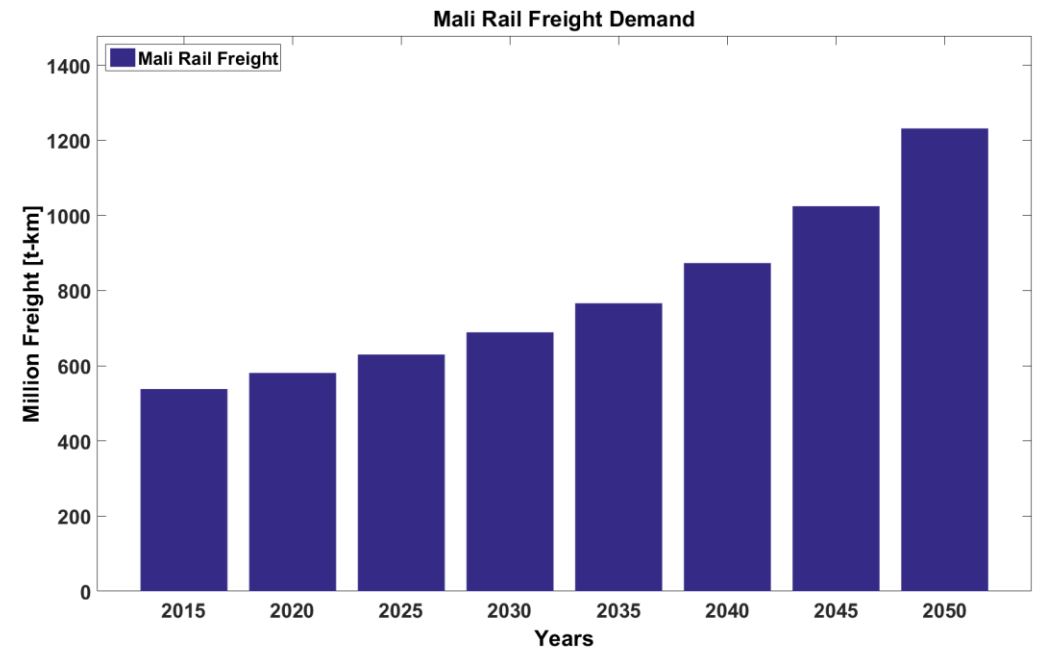

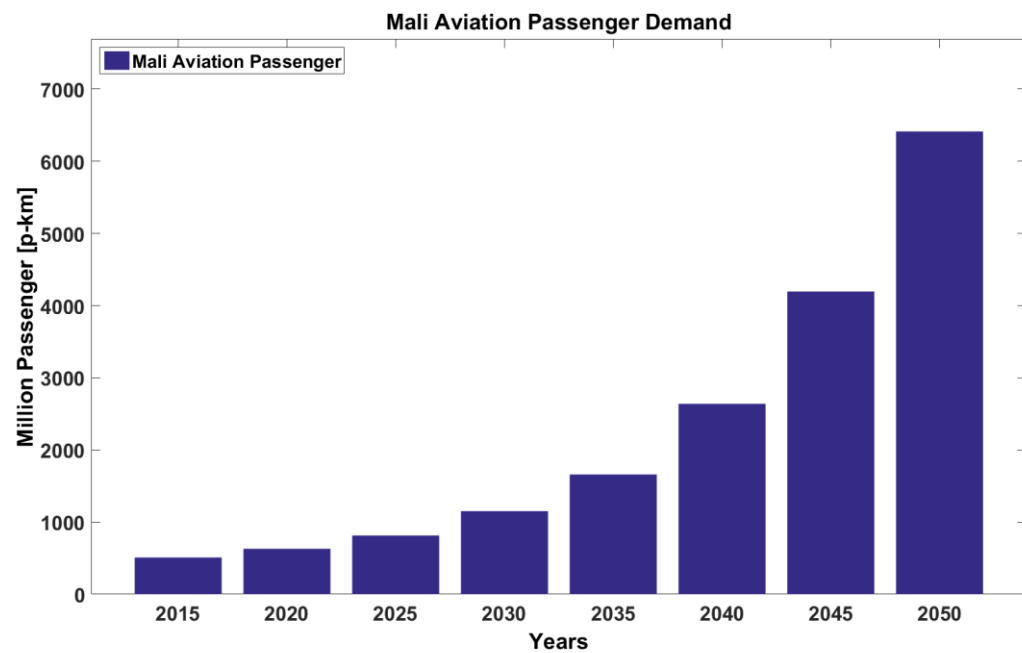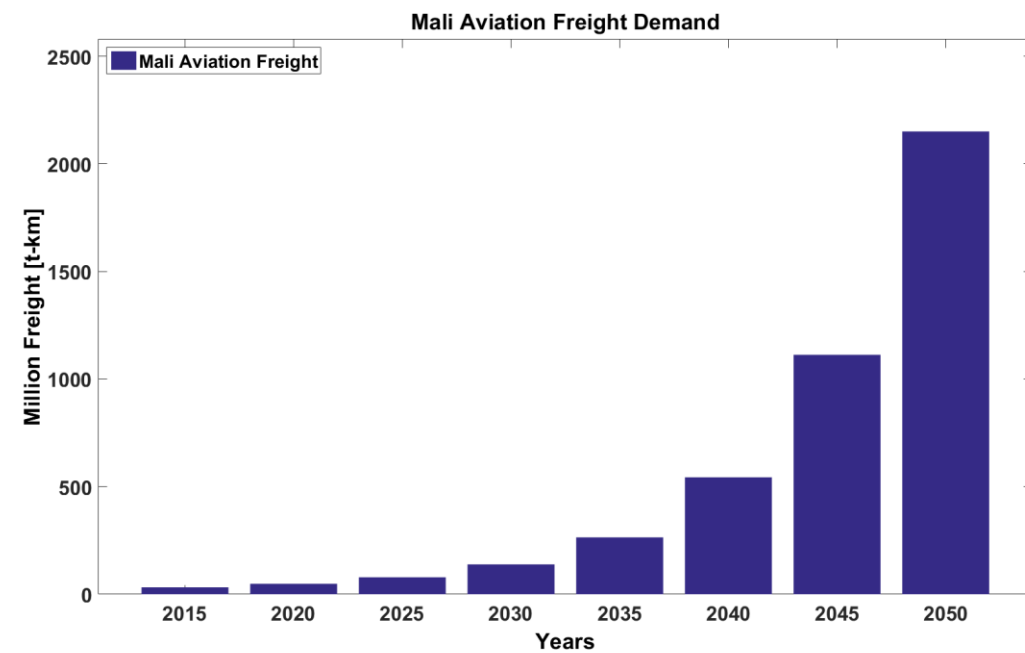

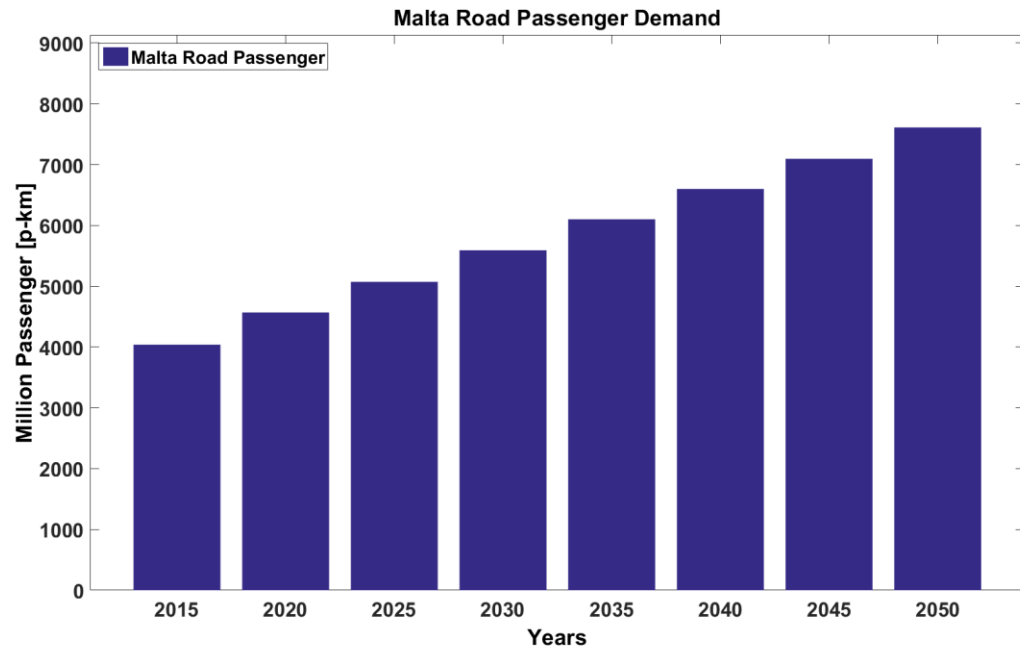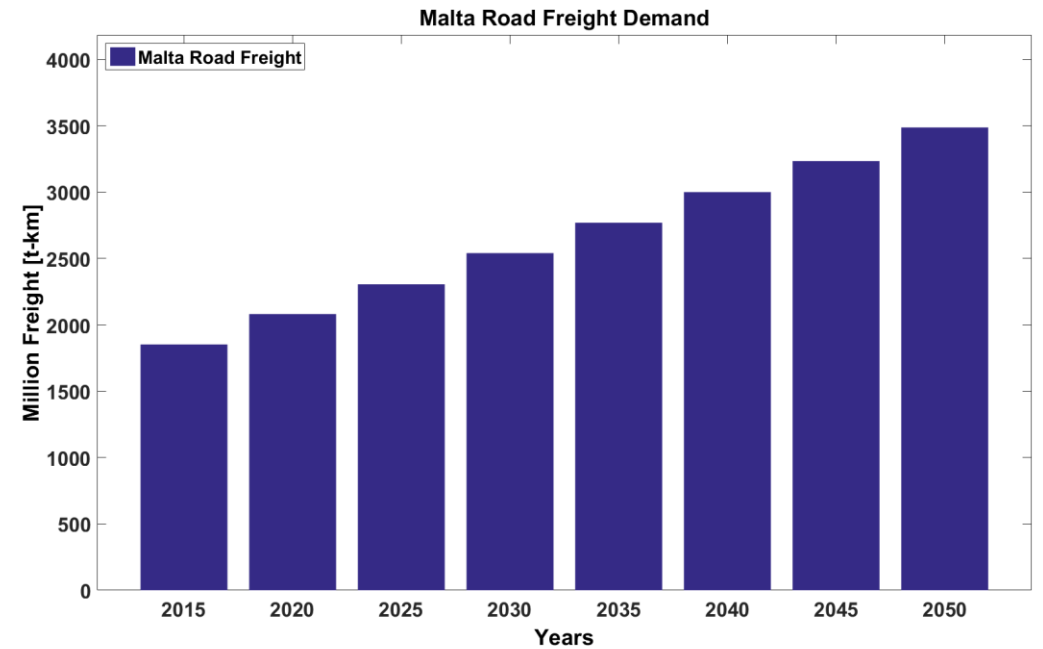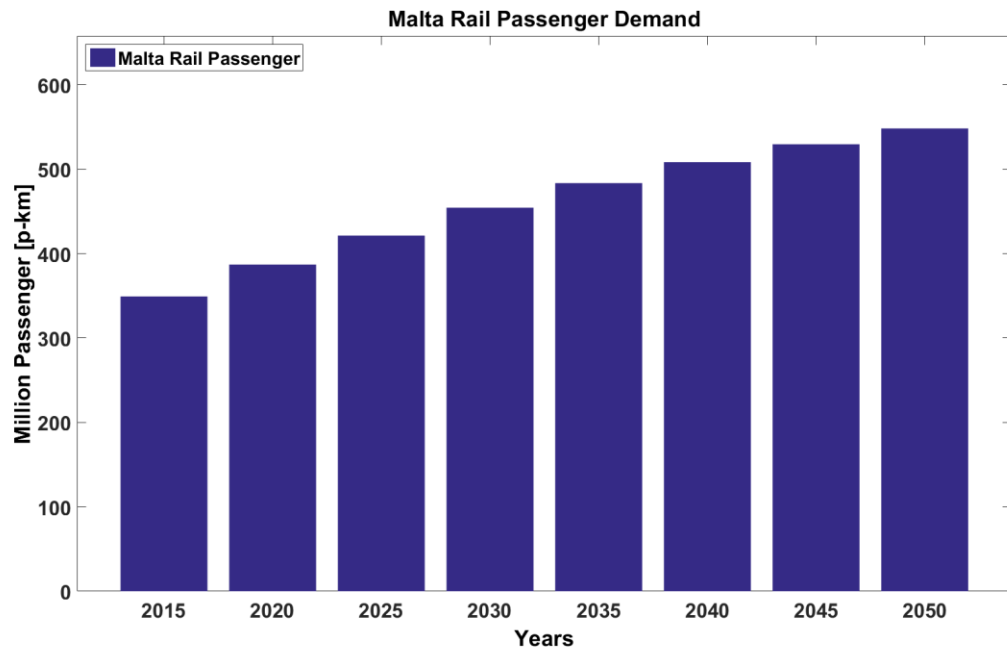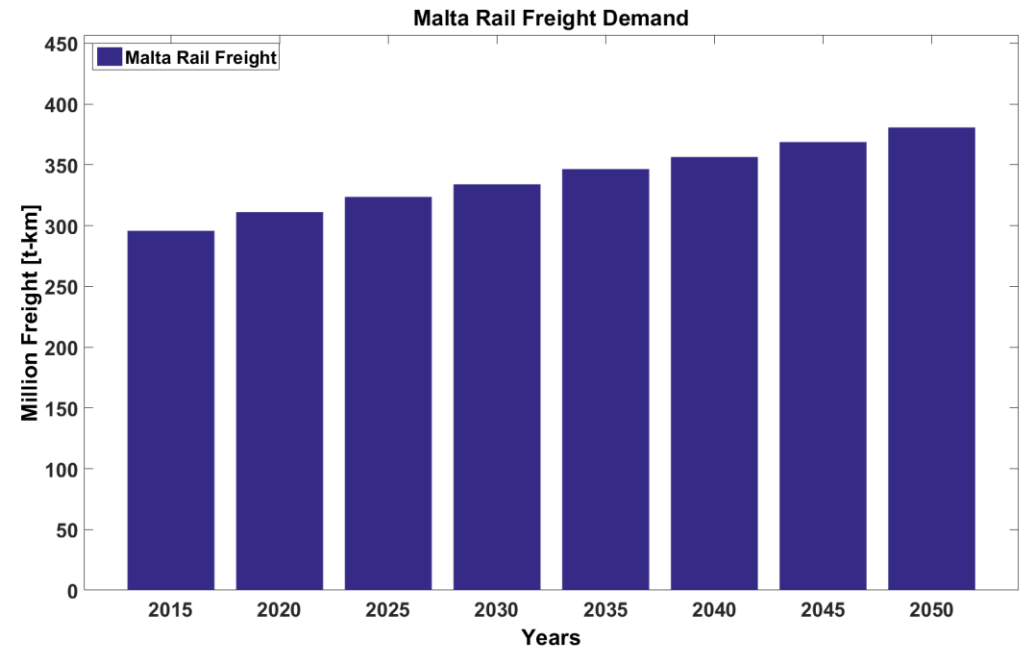

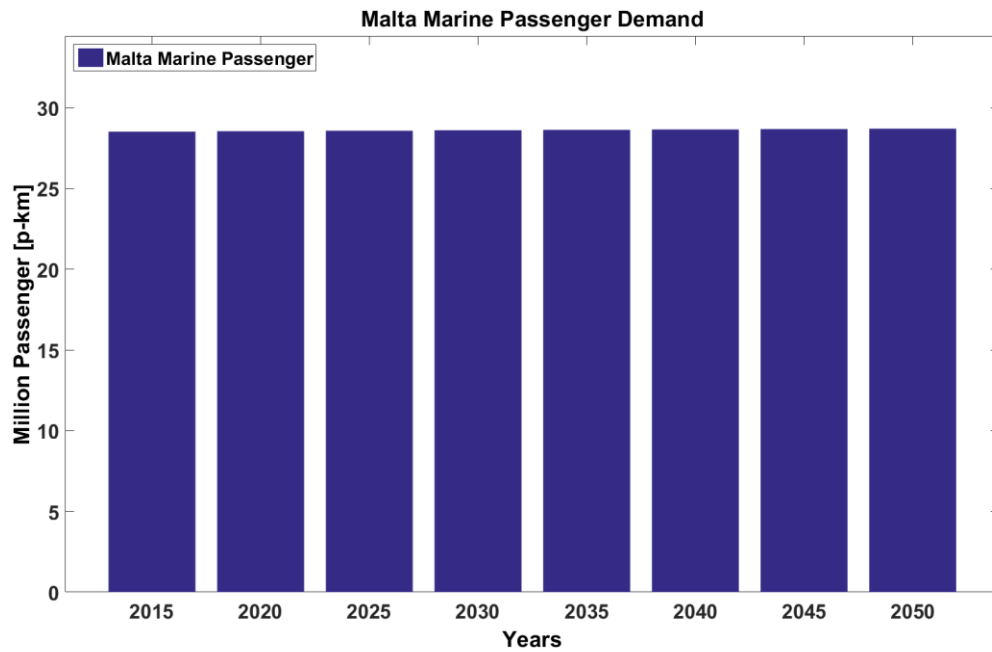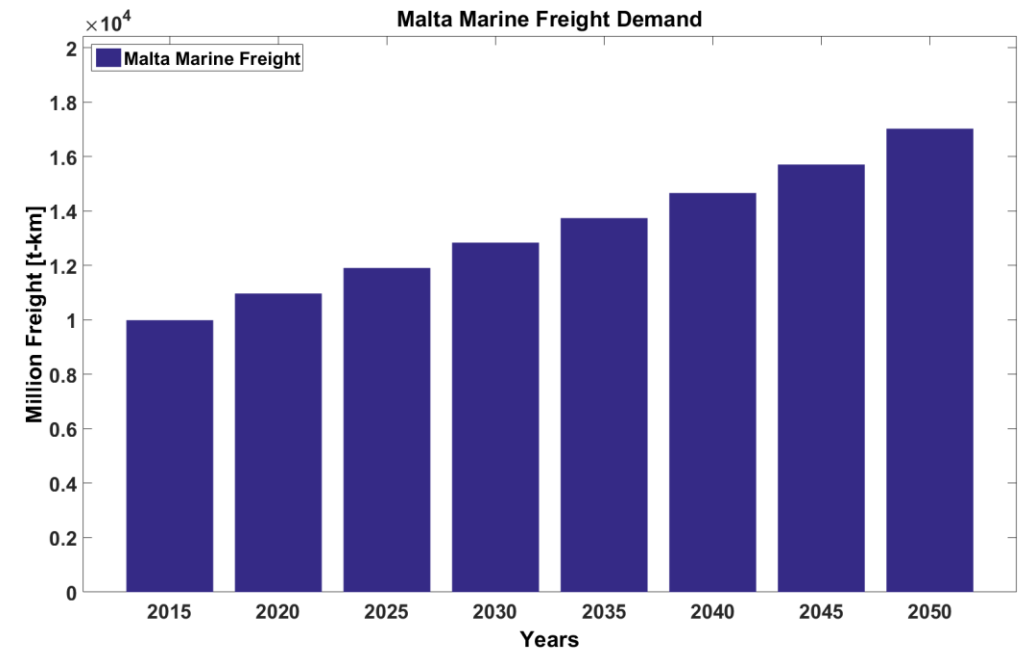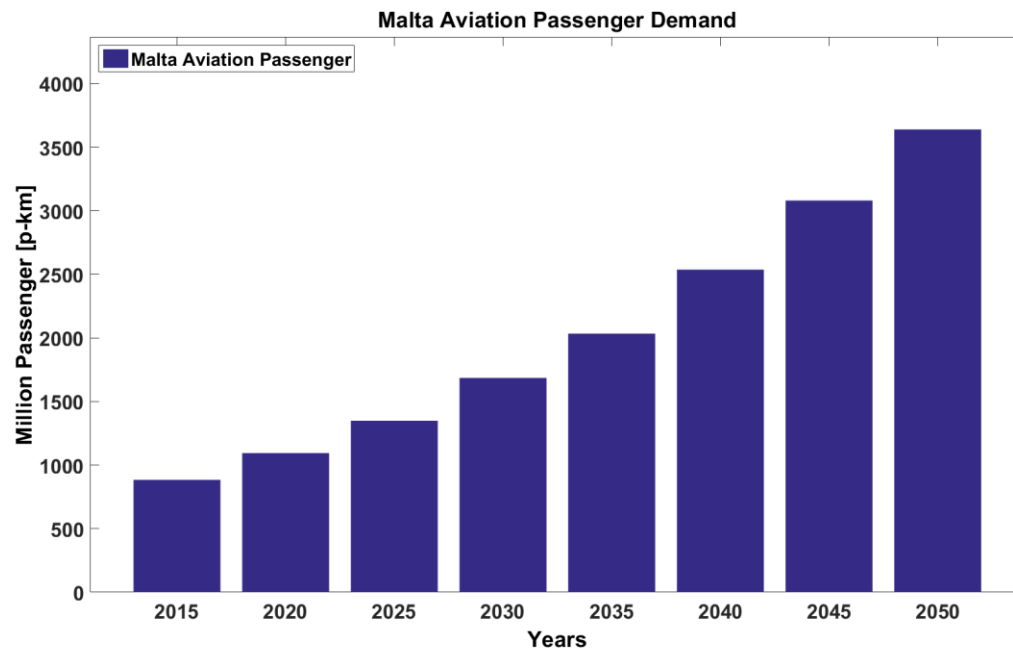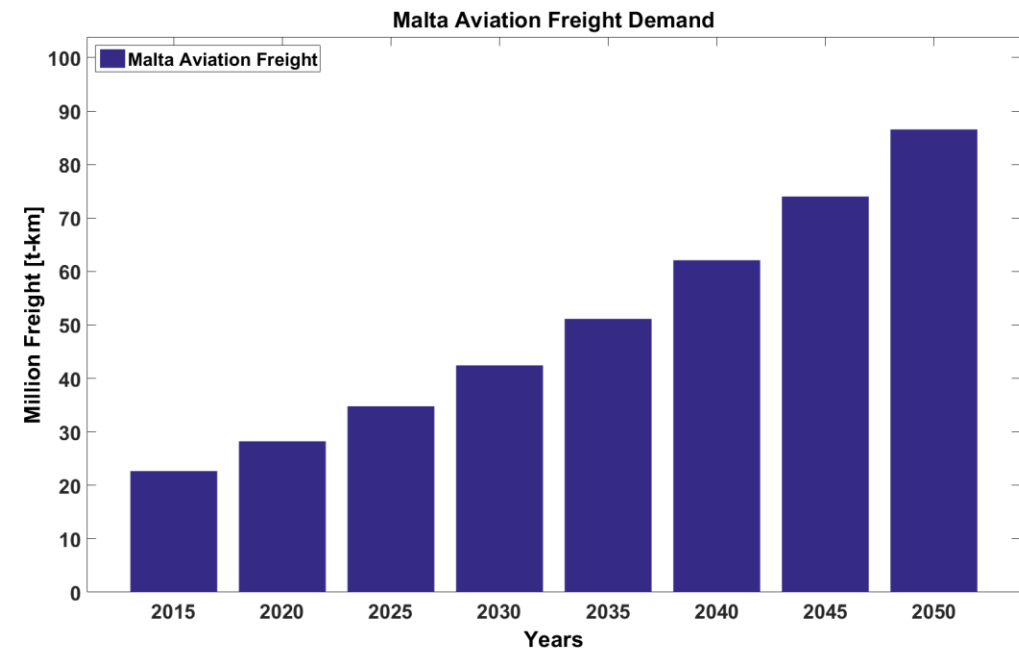

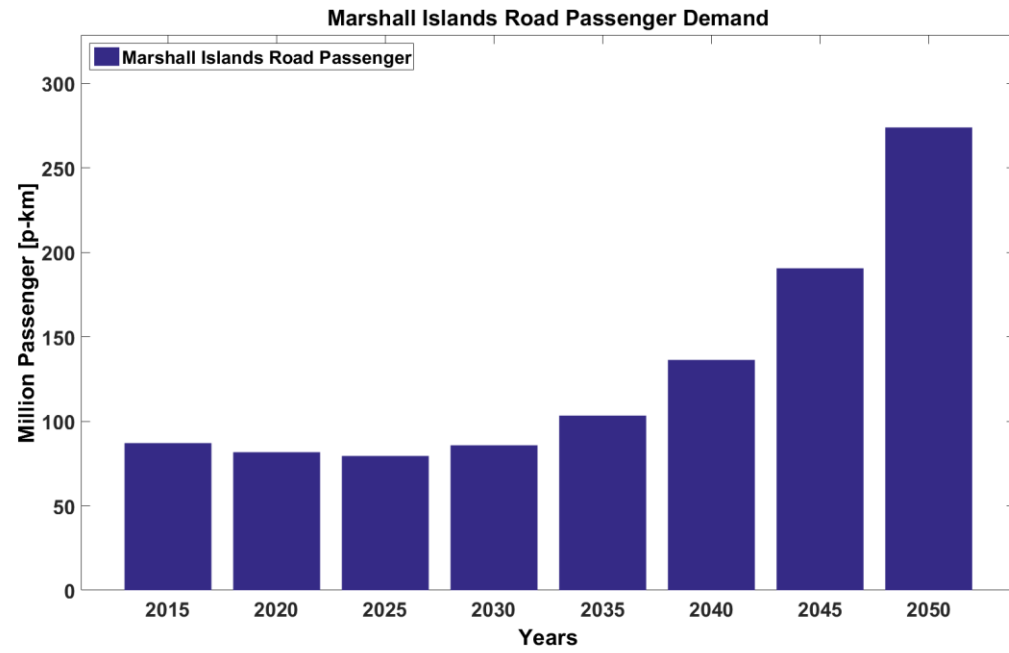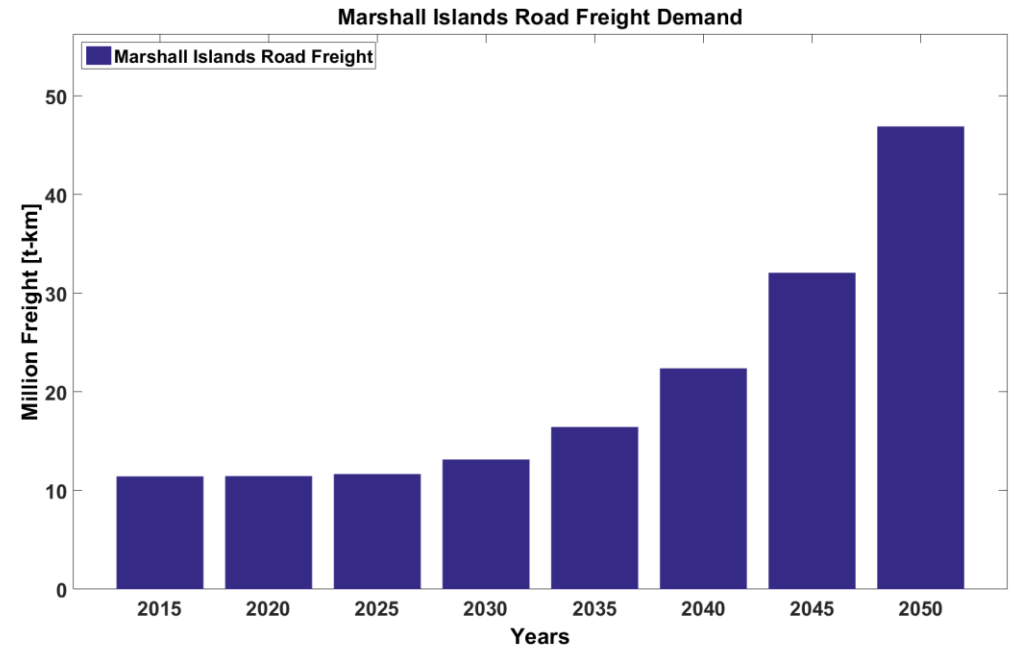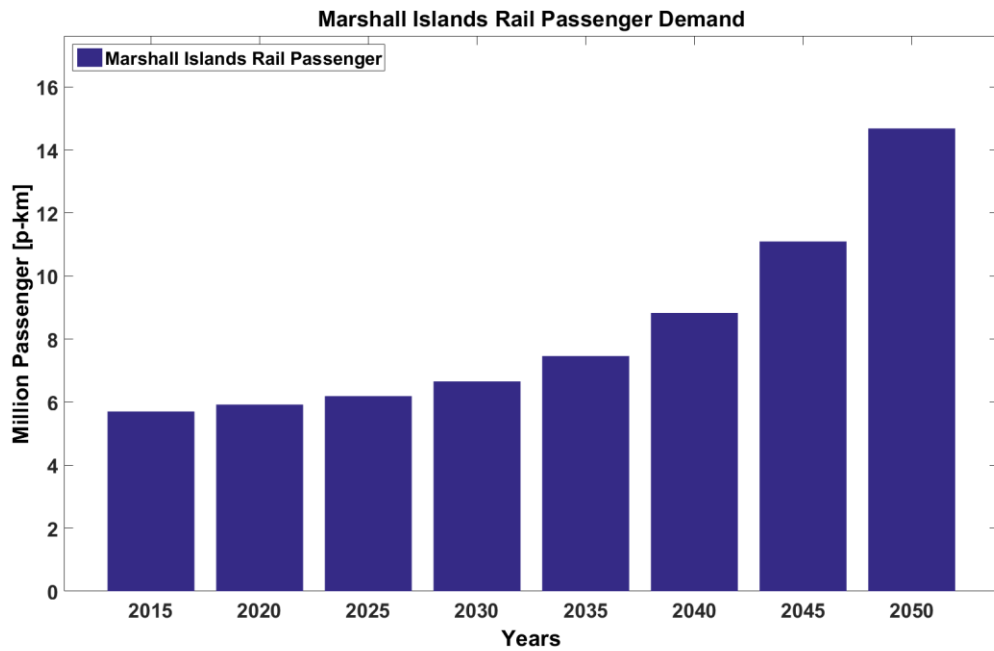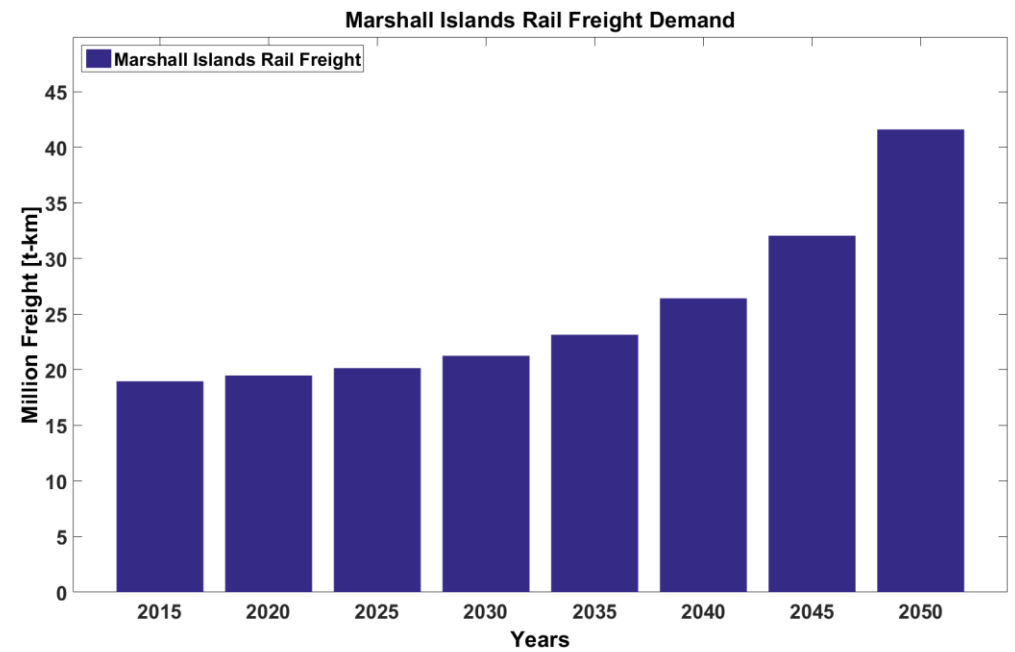

Marshall Islands Marine Passenger Demand

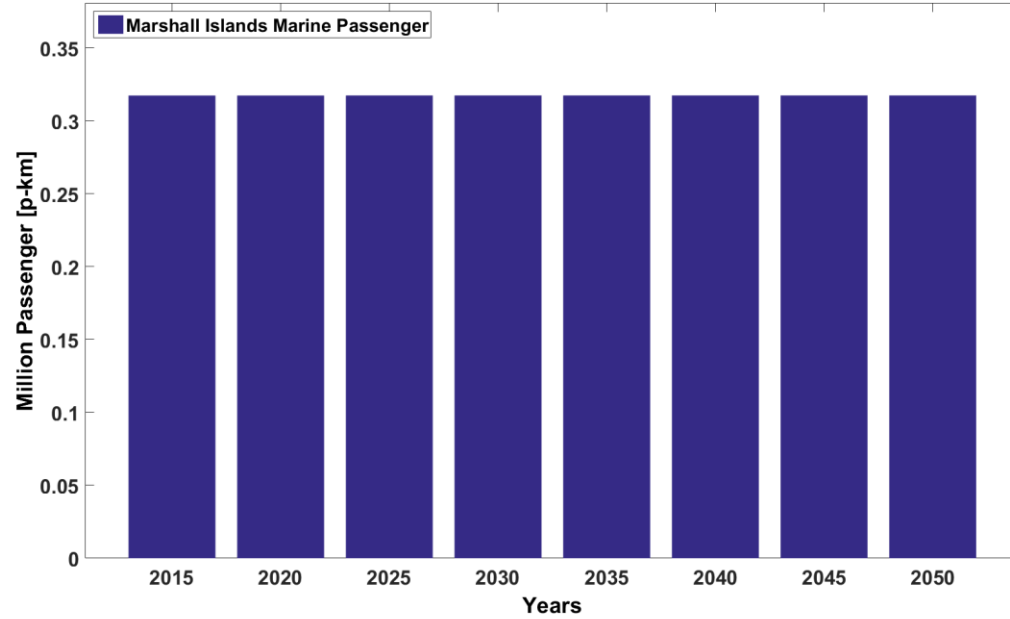

Marshall Islands Marine Freight Demand

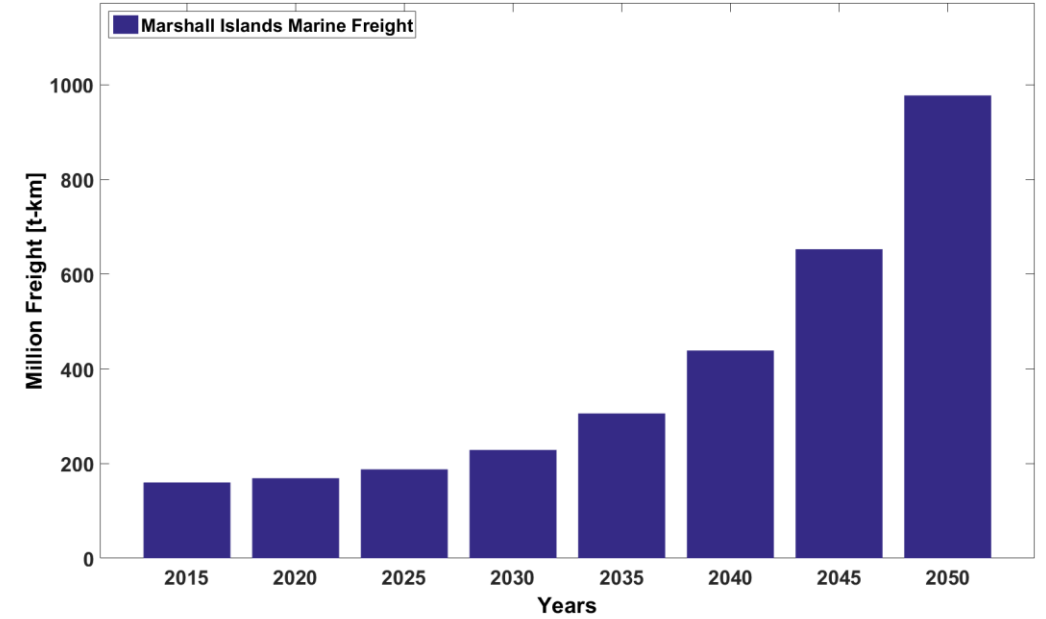

Marshall Islands Aviation Passenger Demand

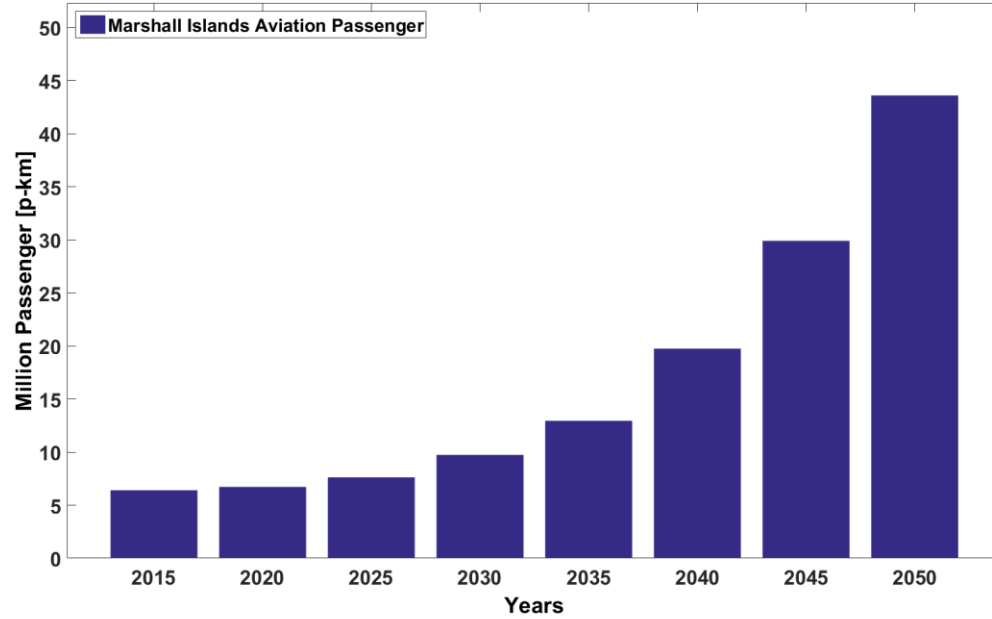

Marshall Islands Aviation Freight Demand

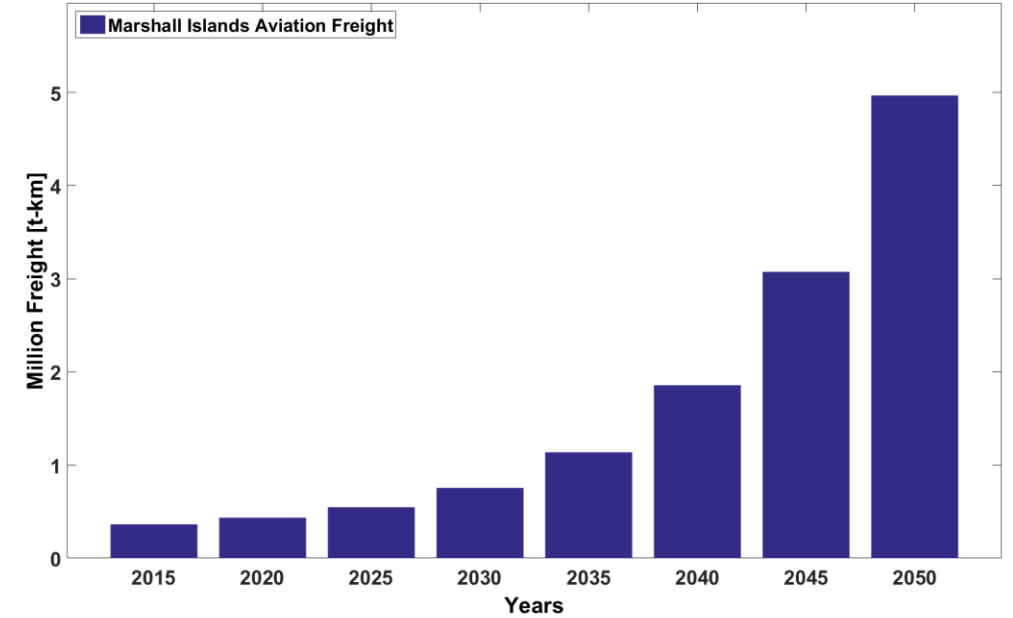

Marshall Islands Road Passenger Demand

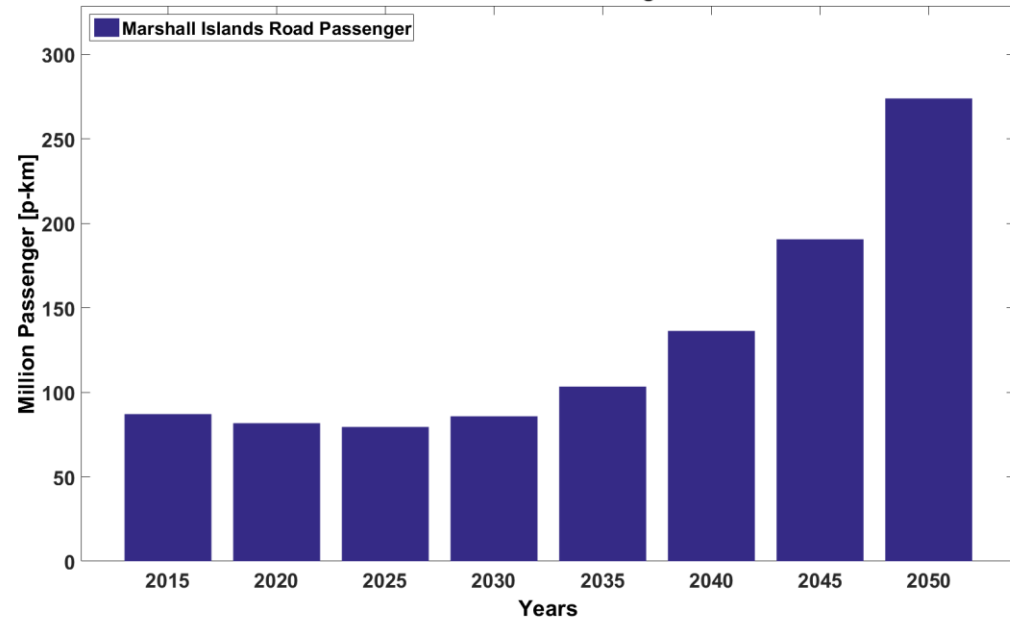

Marshall Islands Road Freight Demand

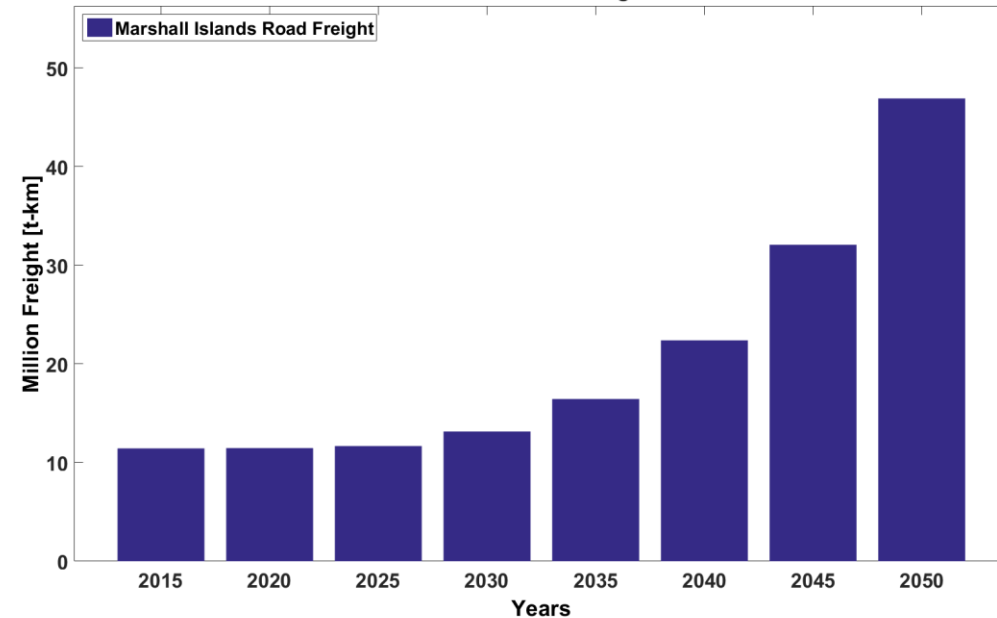

Marshall Islands Rail Passenger Demand

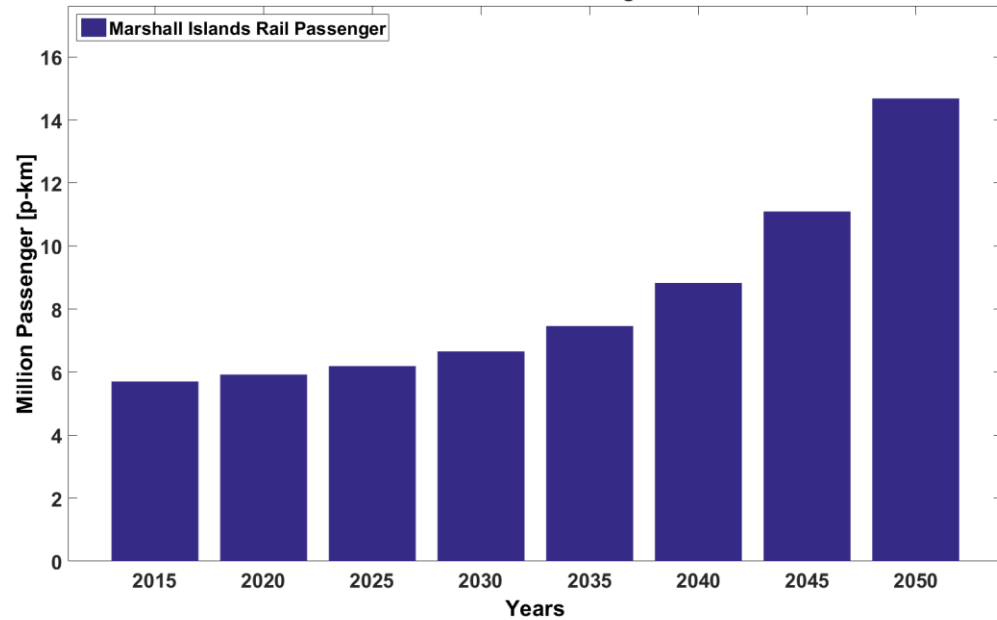

Marshall Islands Rail Freight Demand

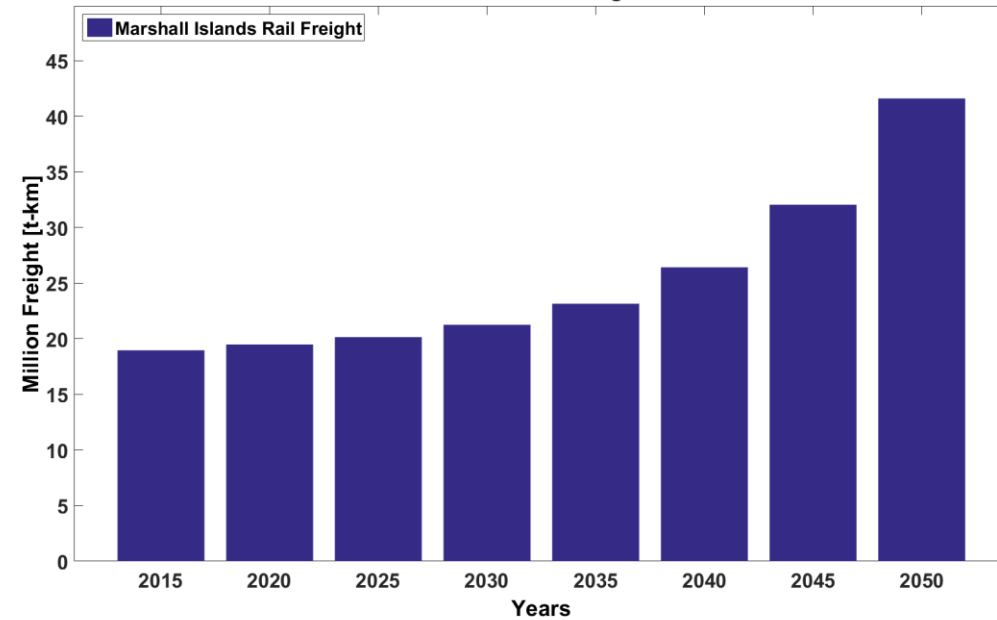

Marshall Islands Marine Passenger Demand

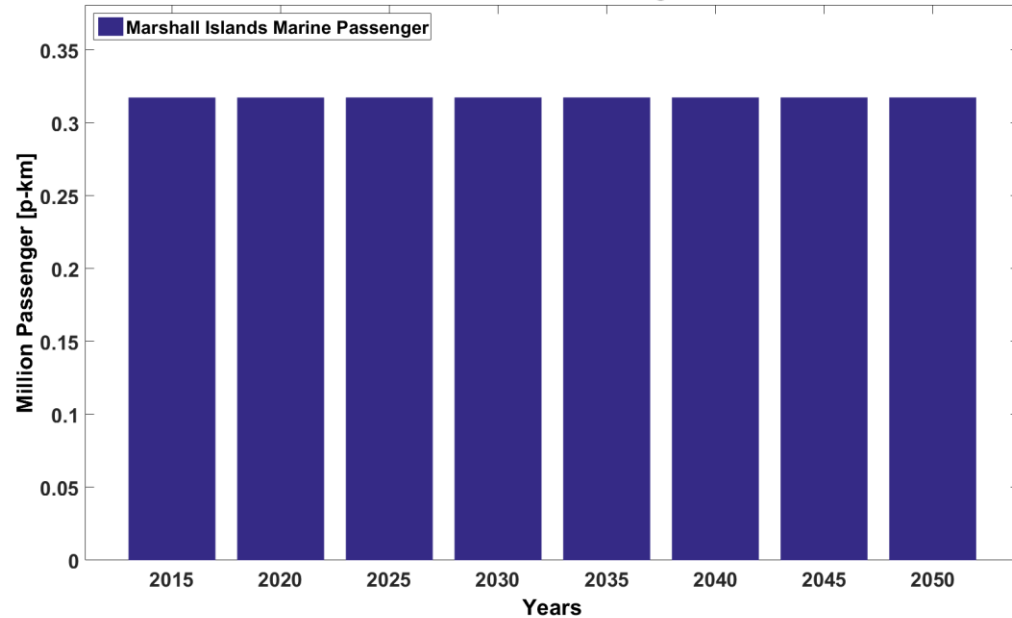

Marshall Islands Marine Freight Demand

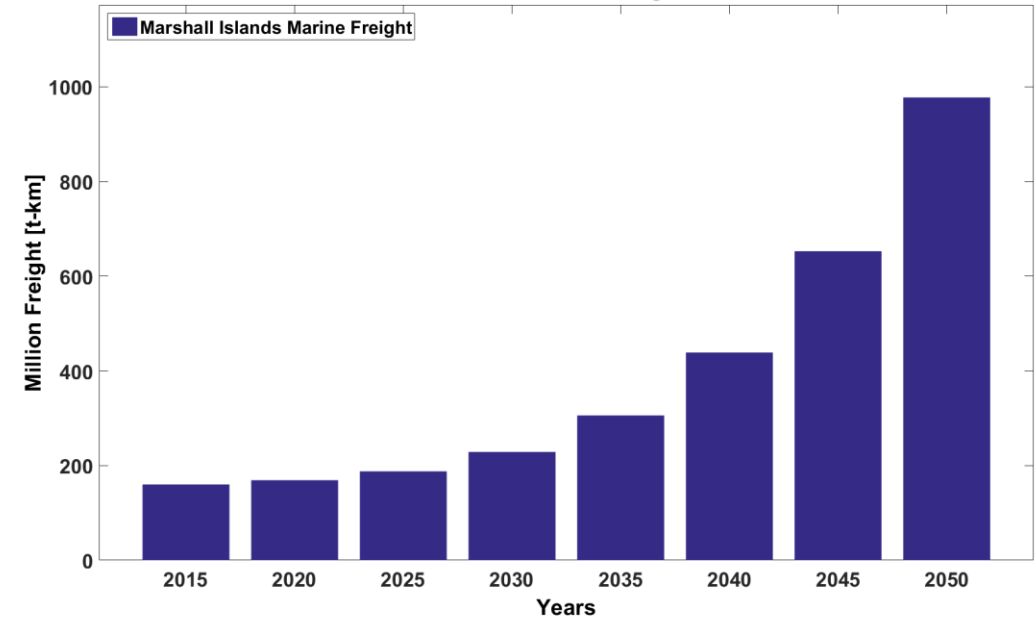

Marshall Islands Aviation Passenger Demand

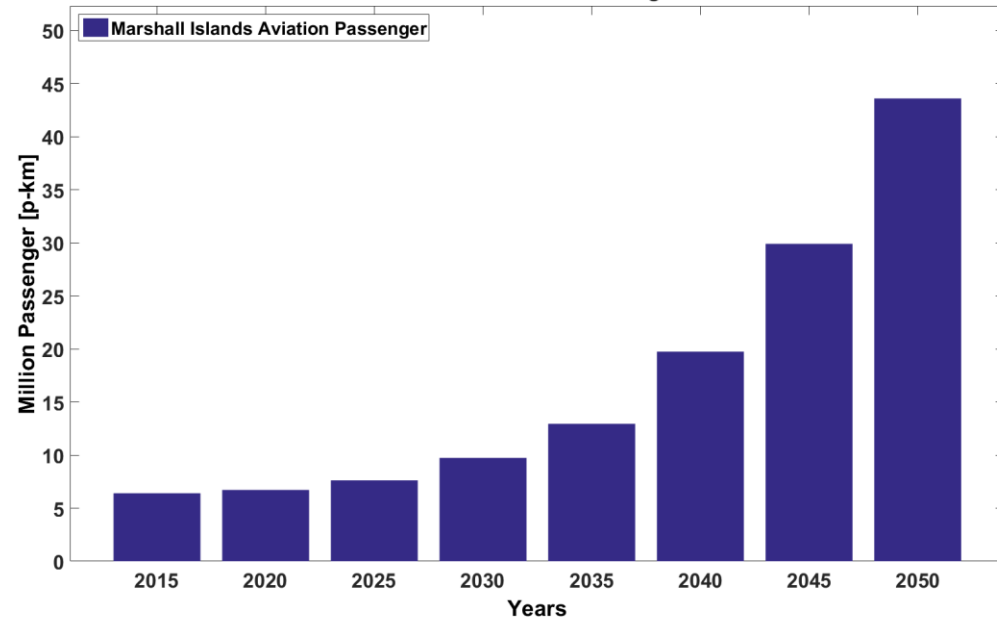

Marshall Islands Aviation Freight Demand

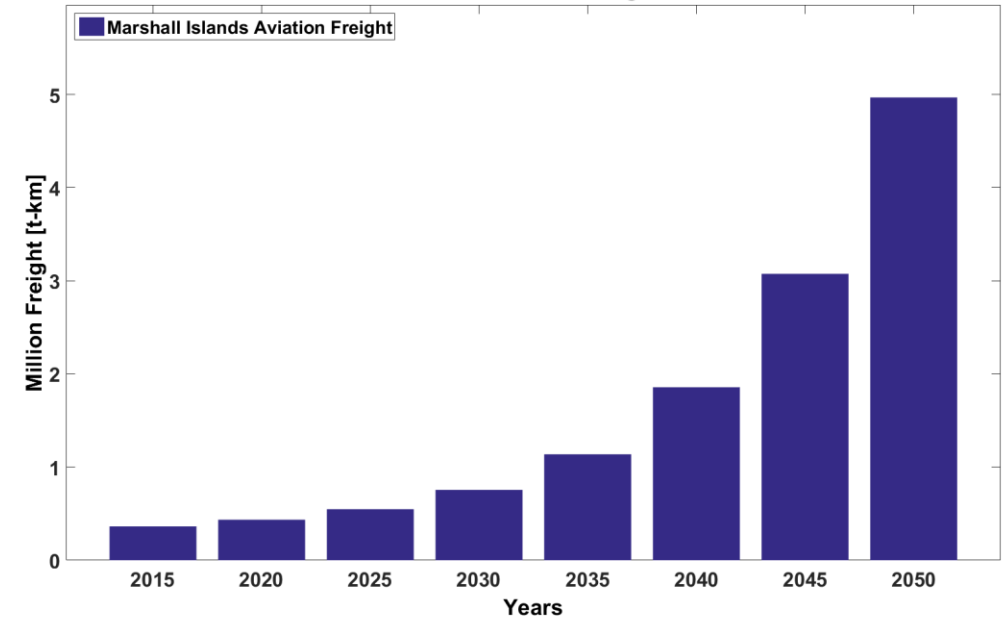

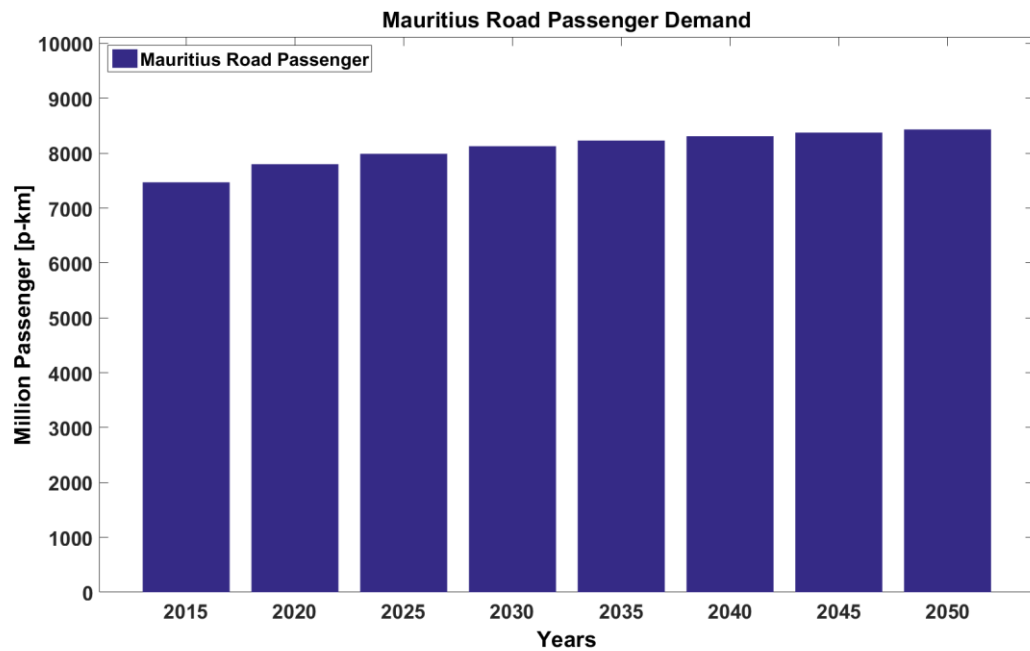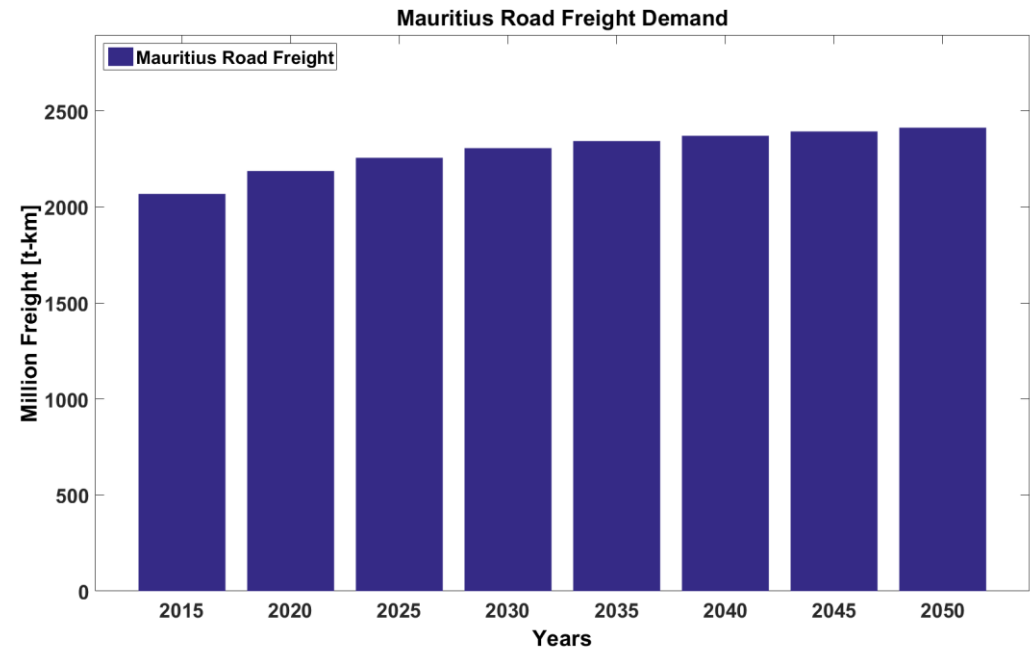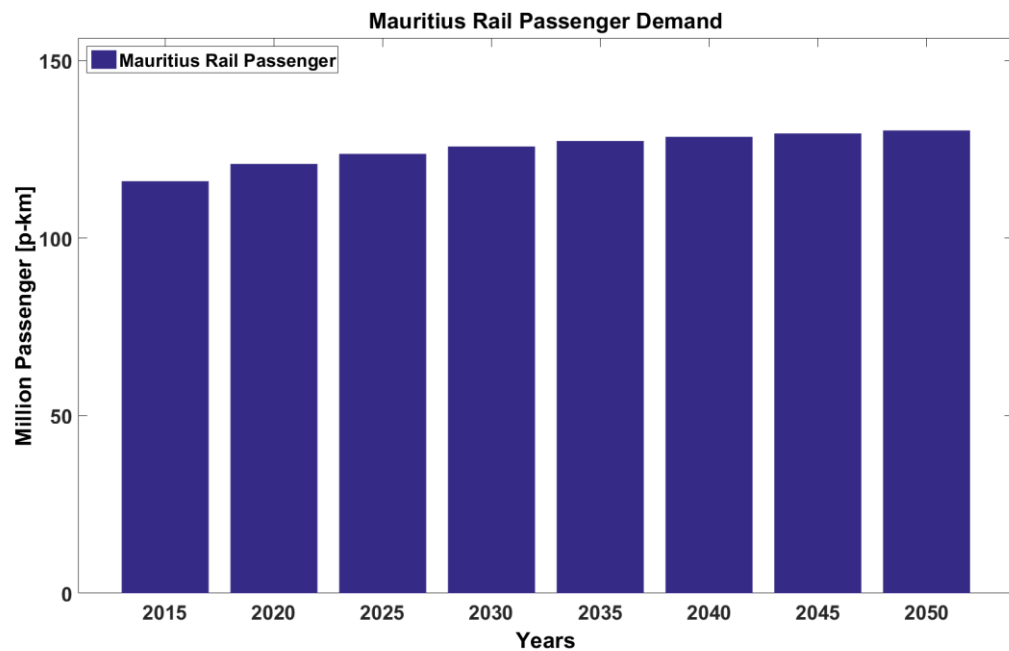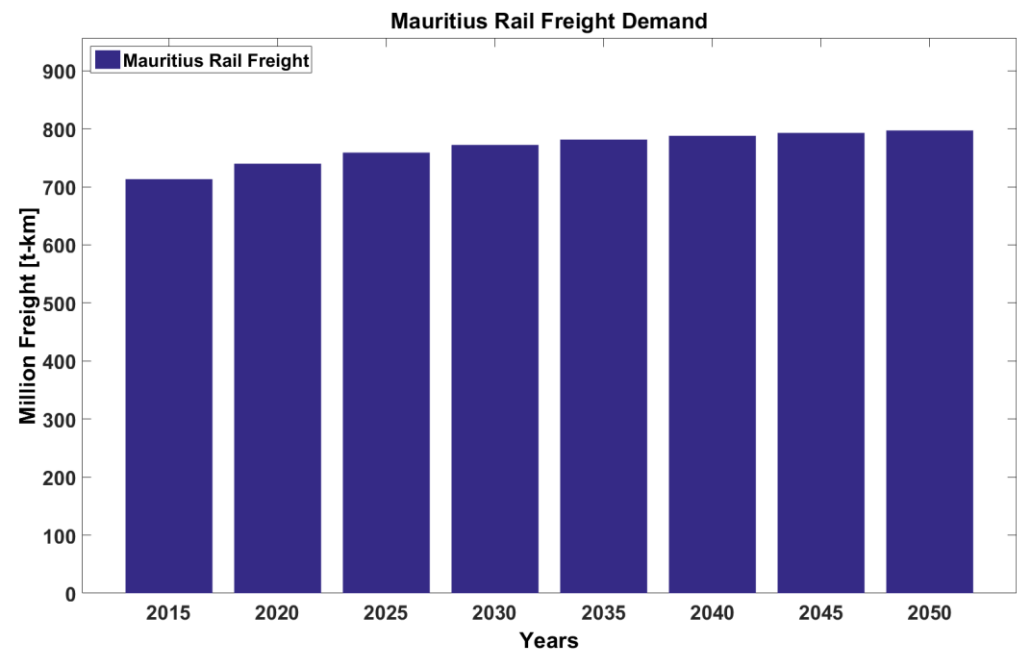

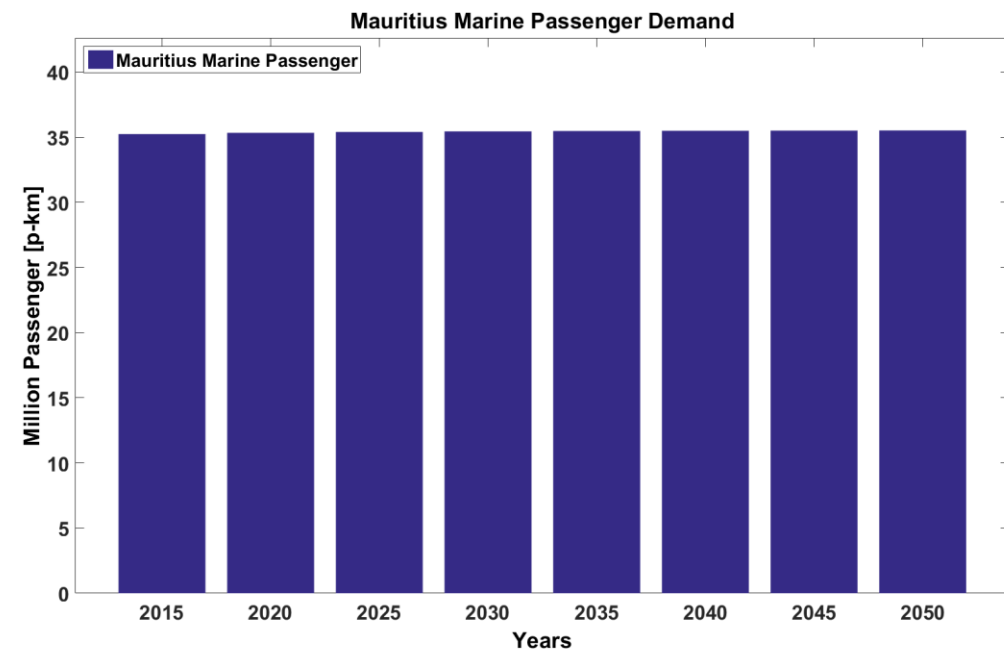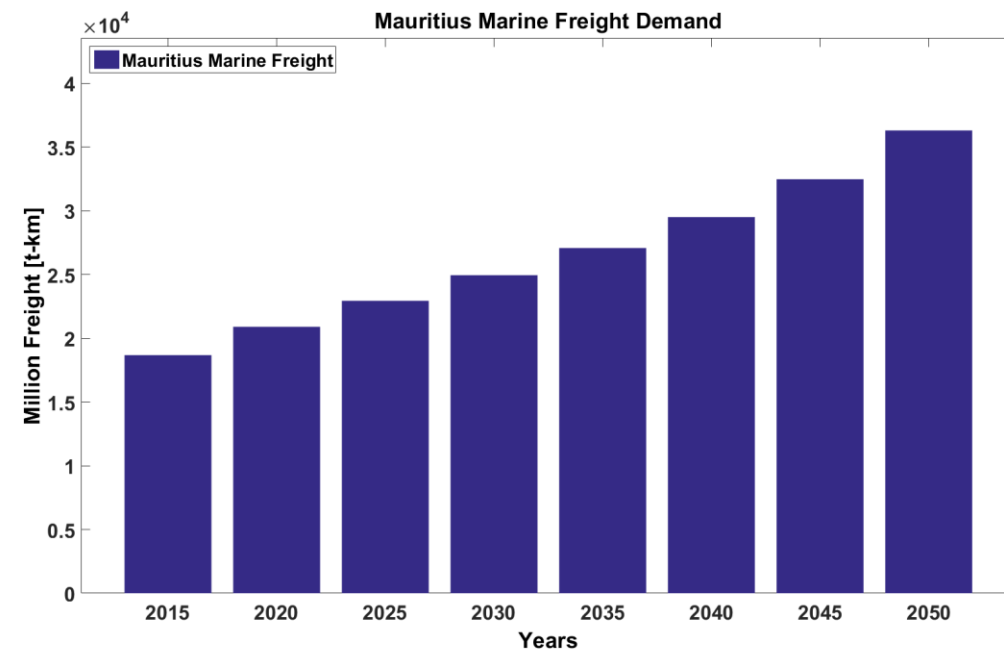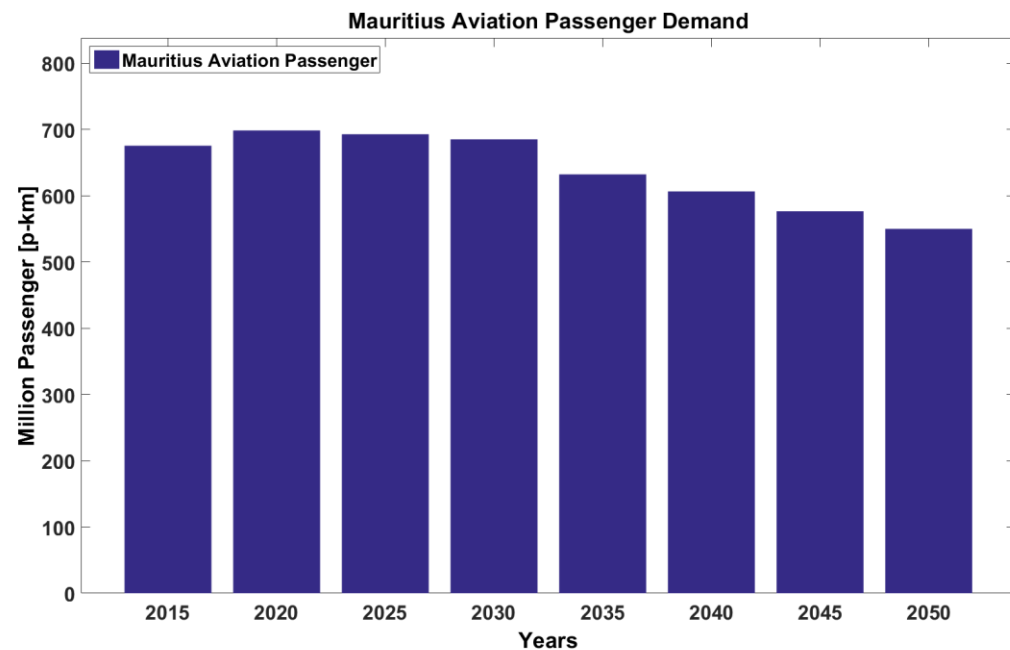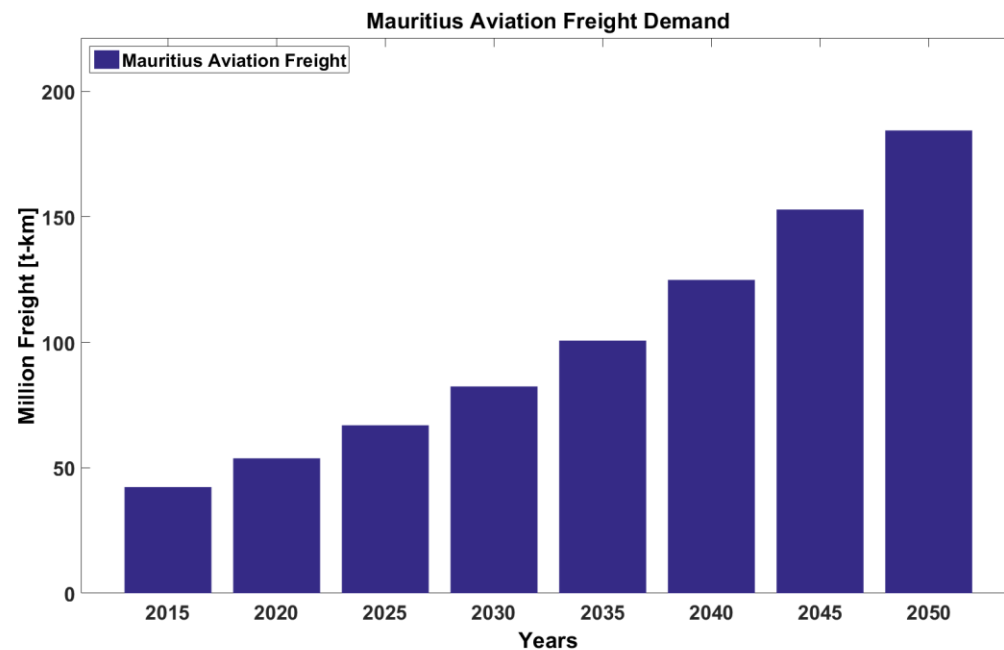

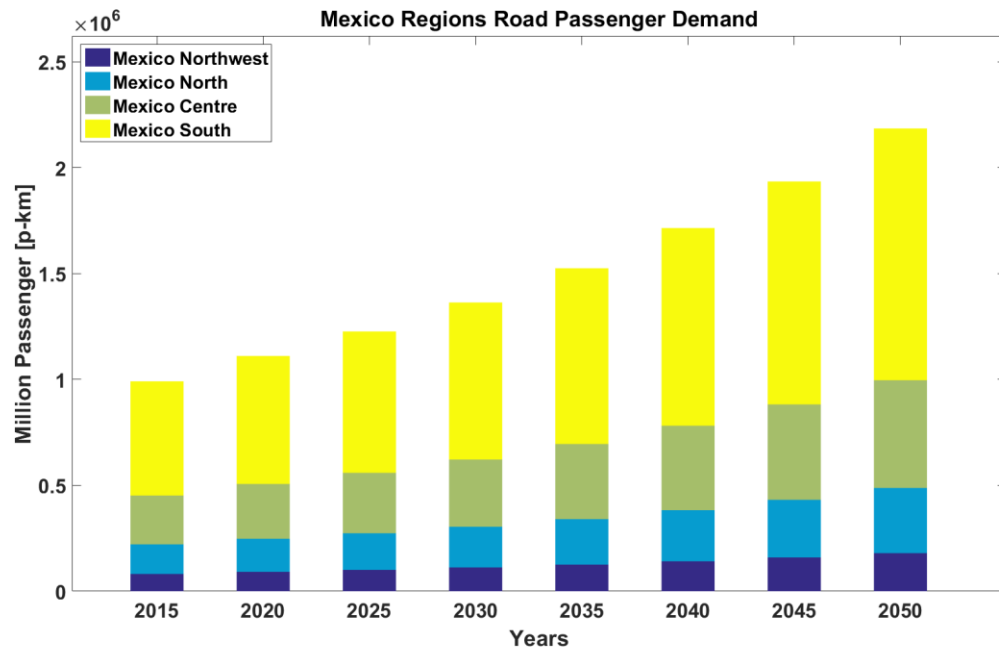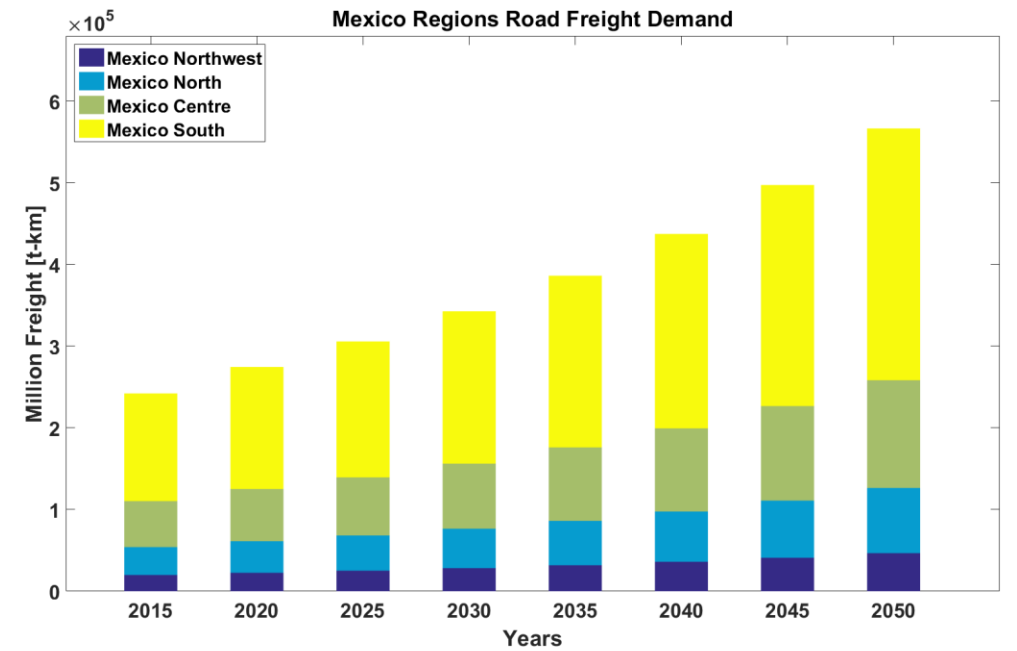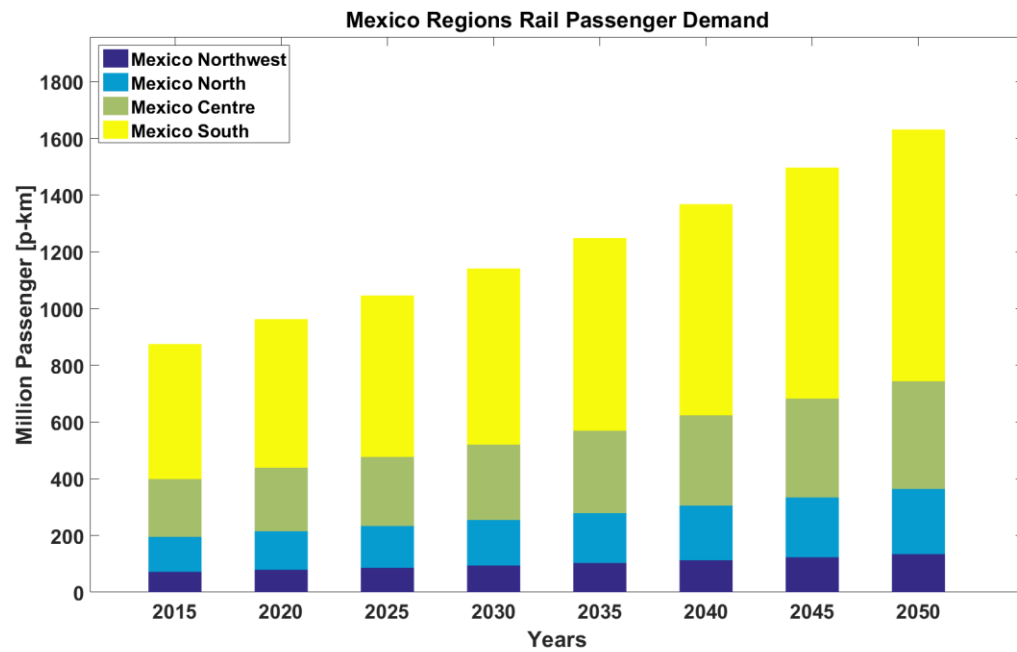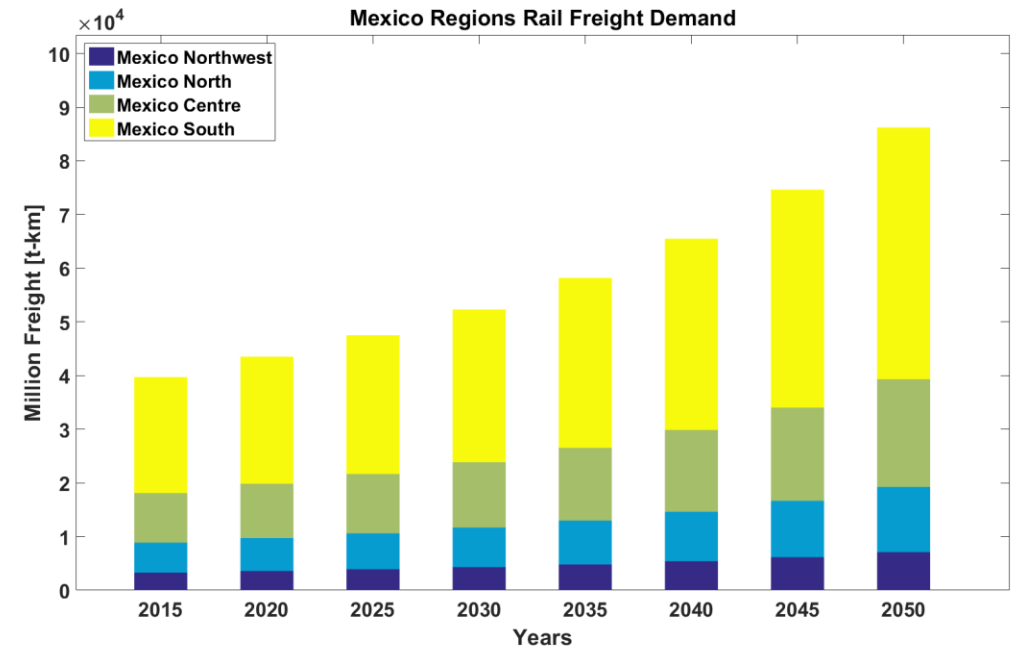

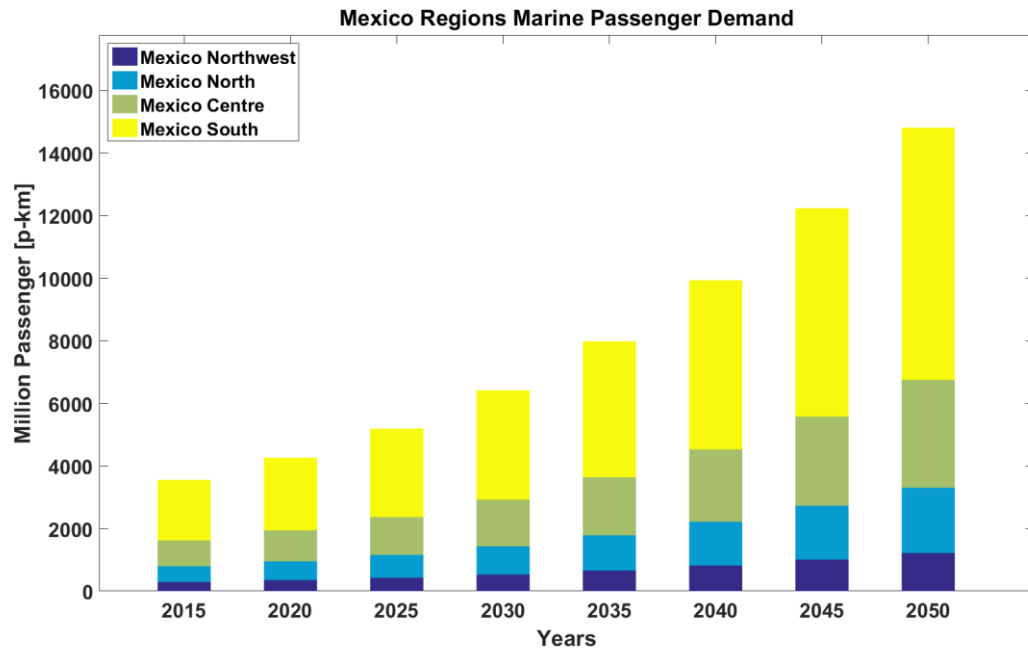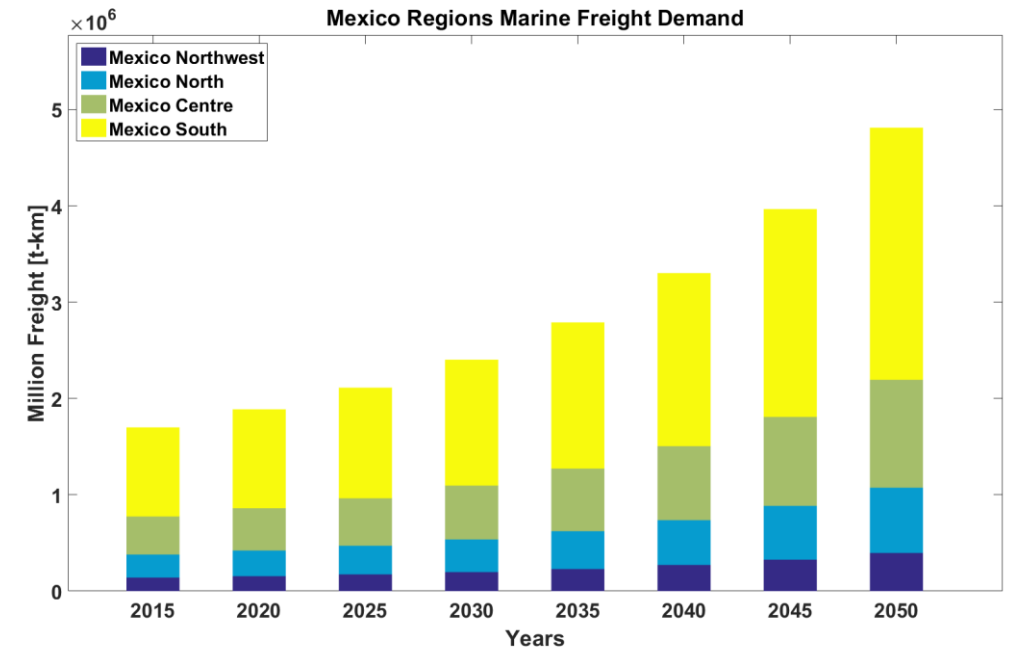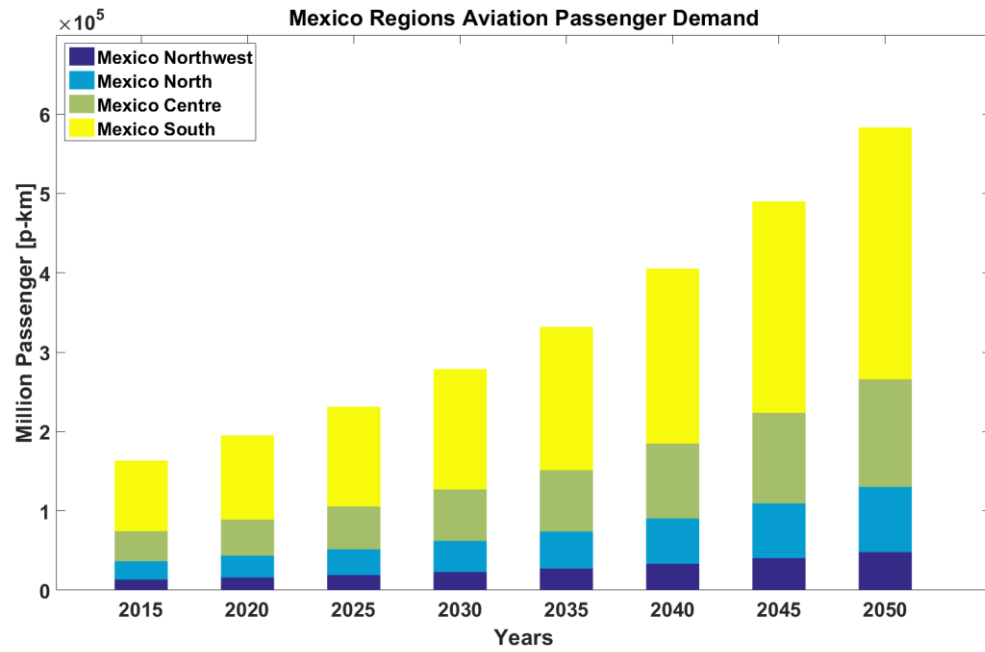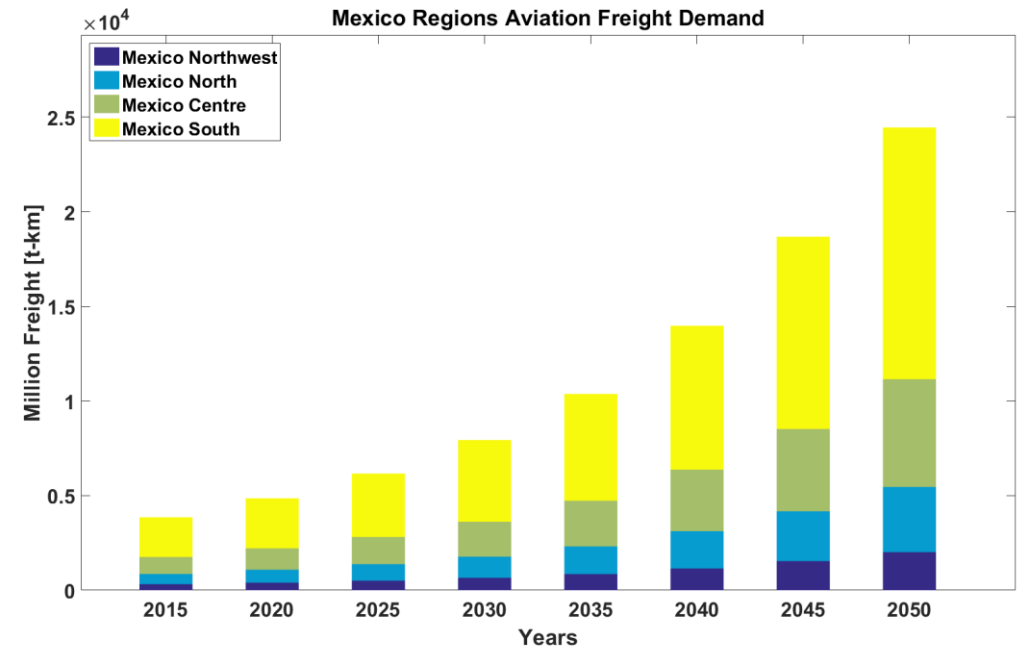

Micronesia Federated States Road Passenger Demand

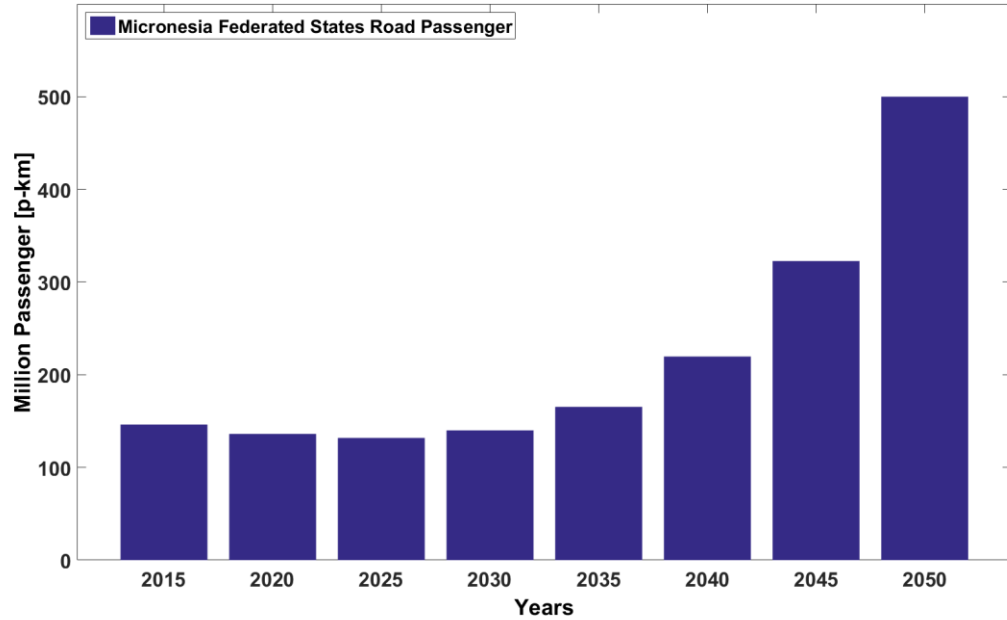

Micronesia Federated States Road Freight Demand

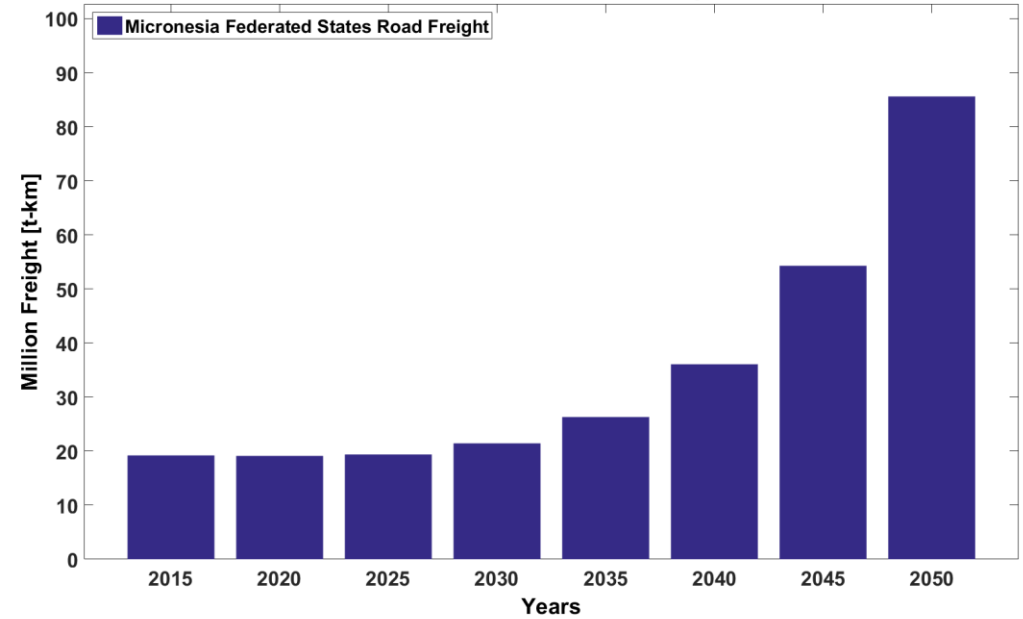

Micronesia Federated States Rail Passenger Demand

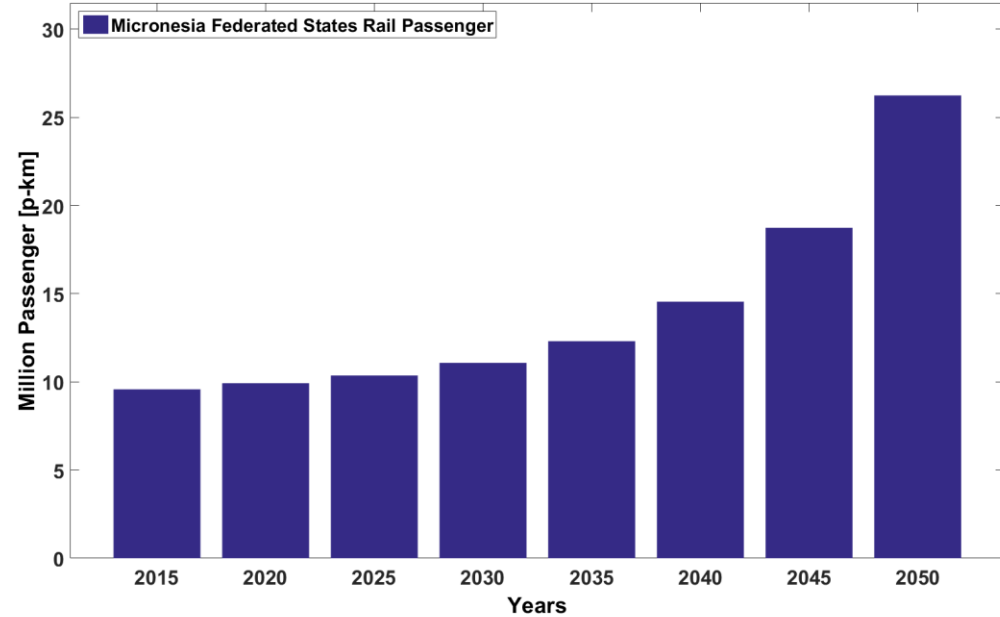

Micronesia Federated States Rail Freight Demand

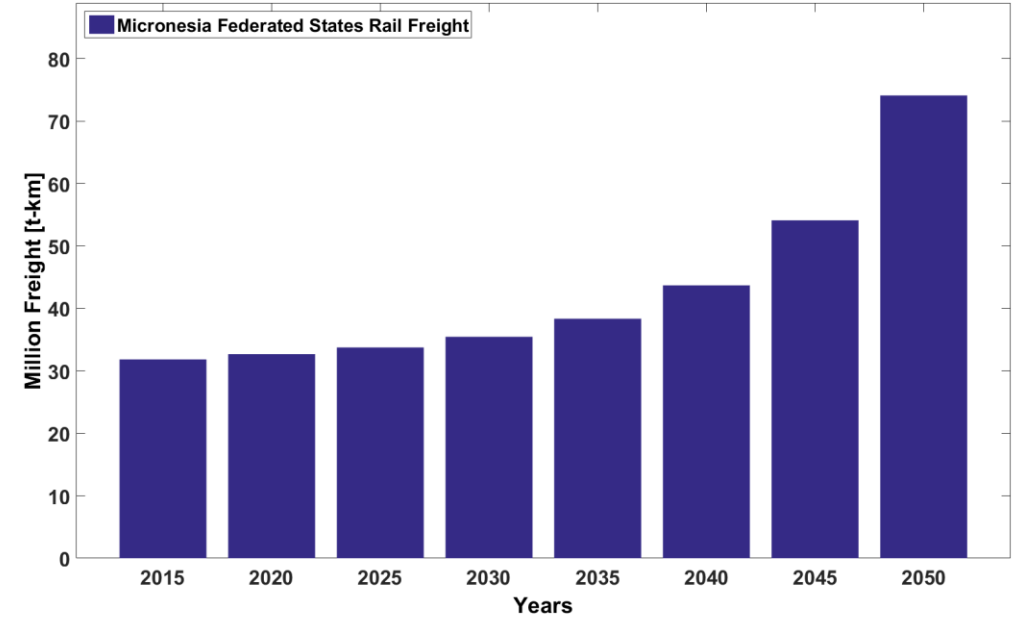

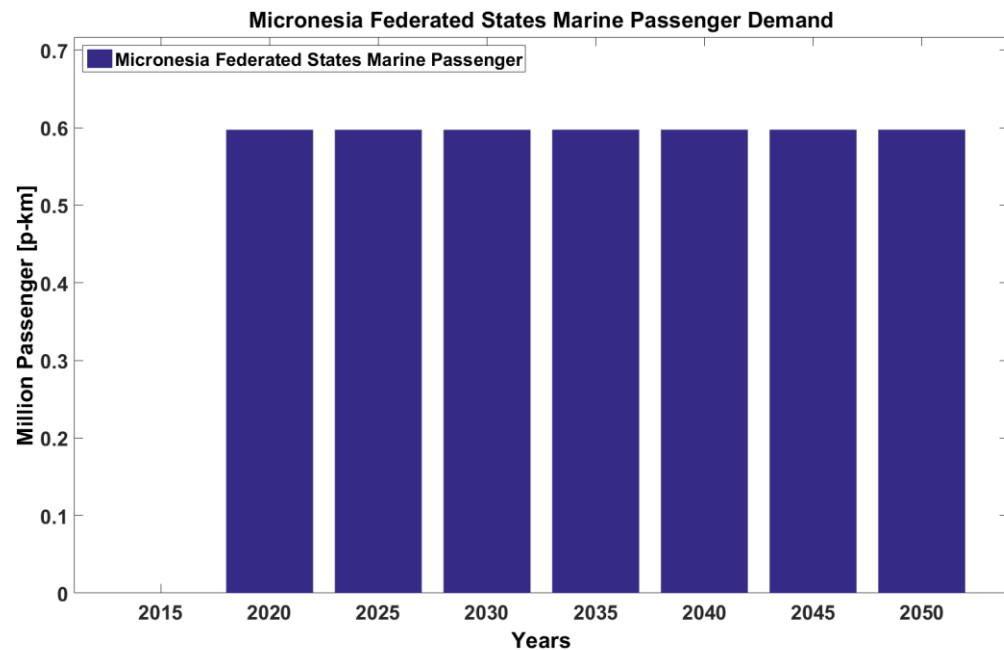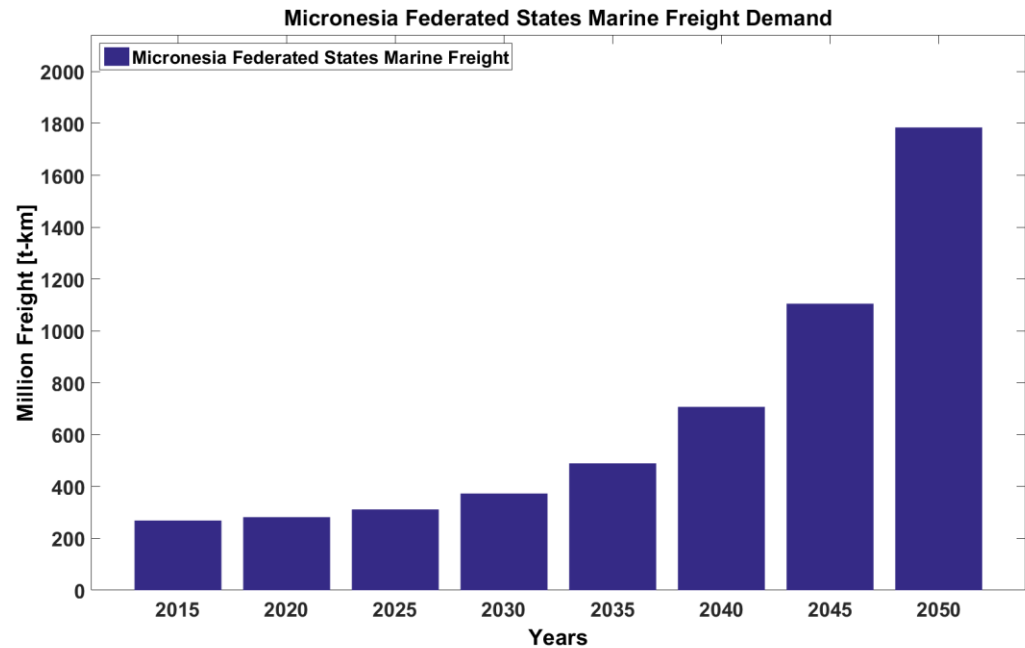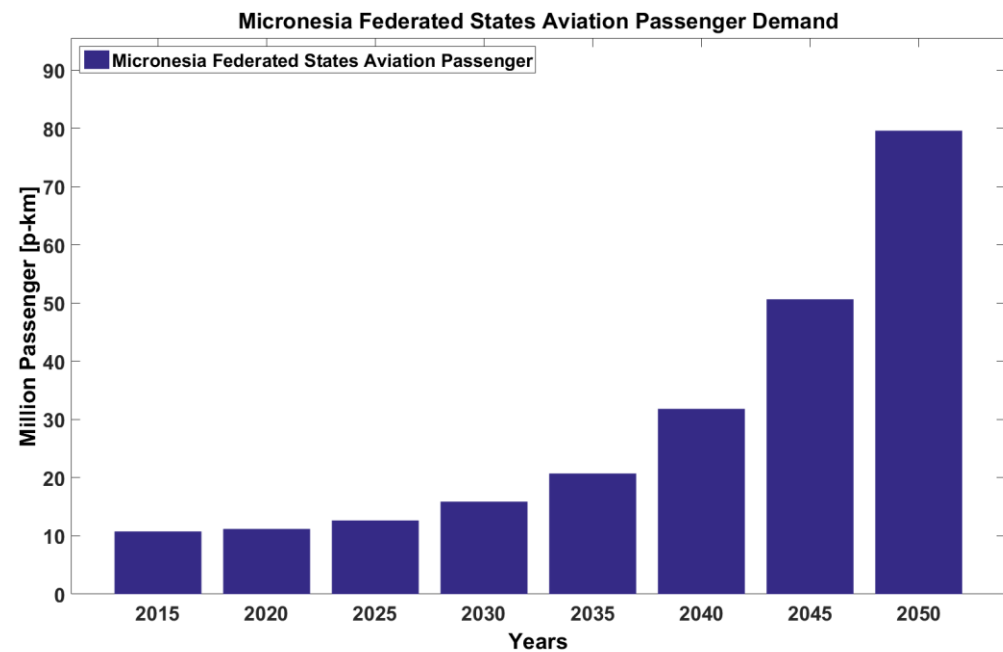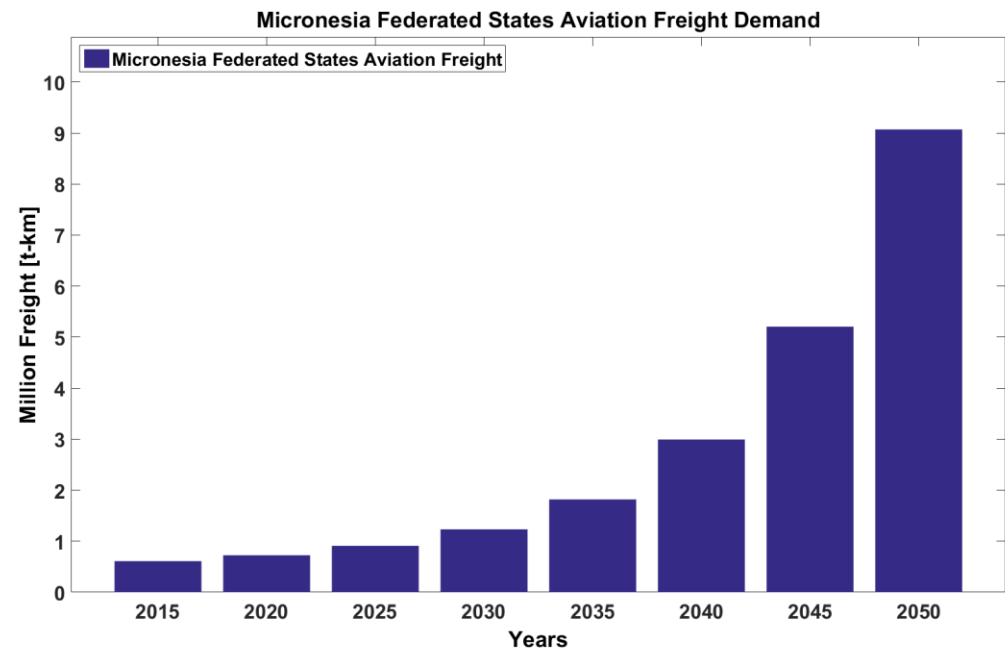

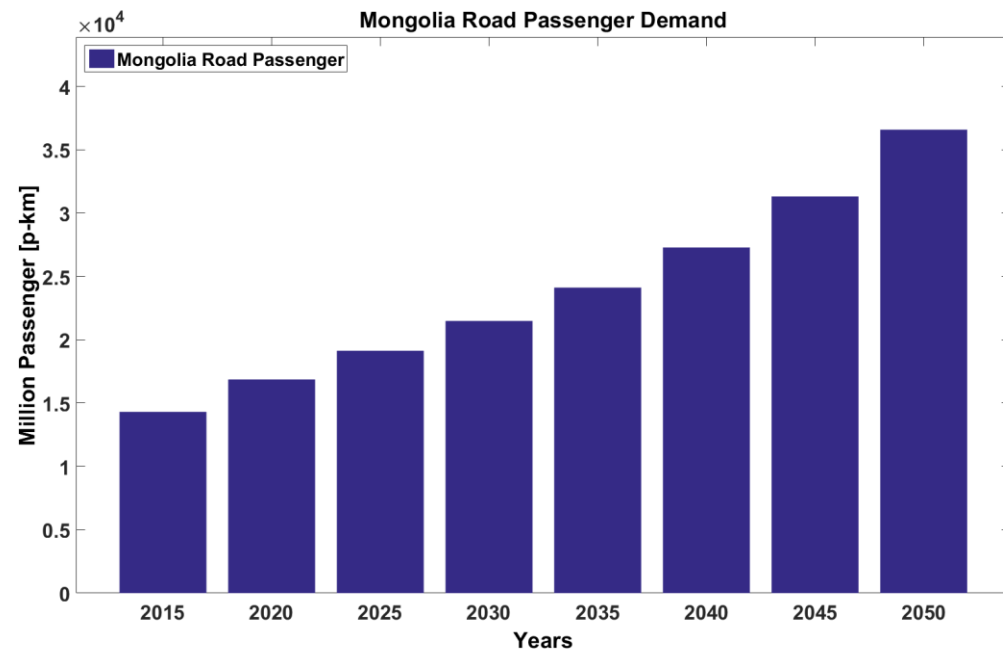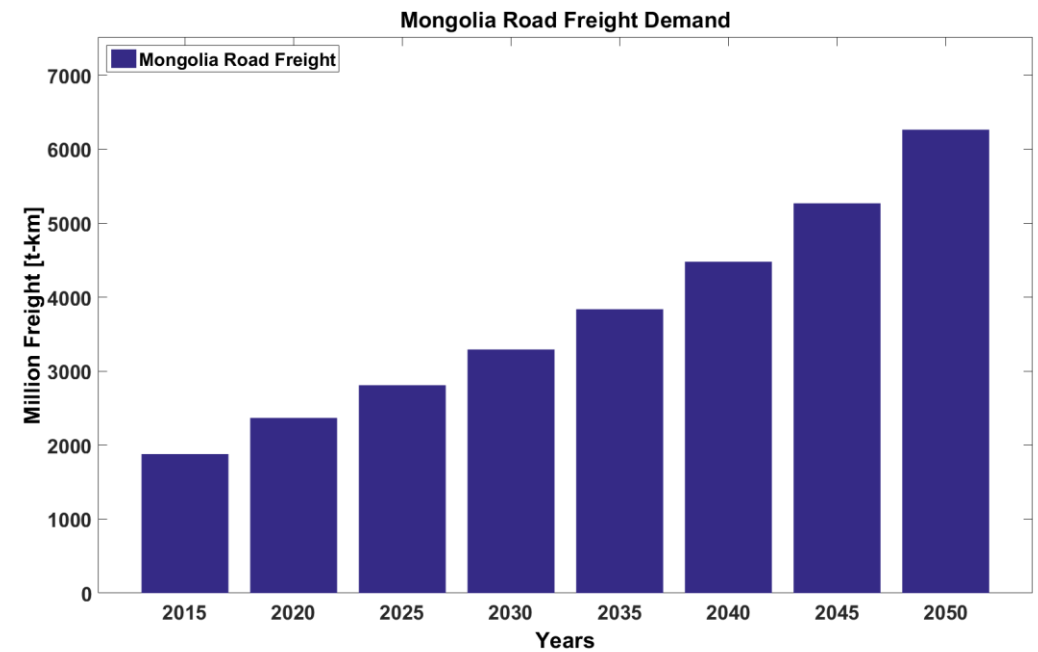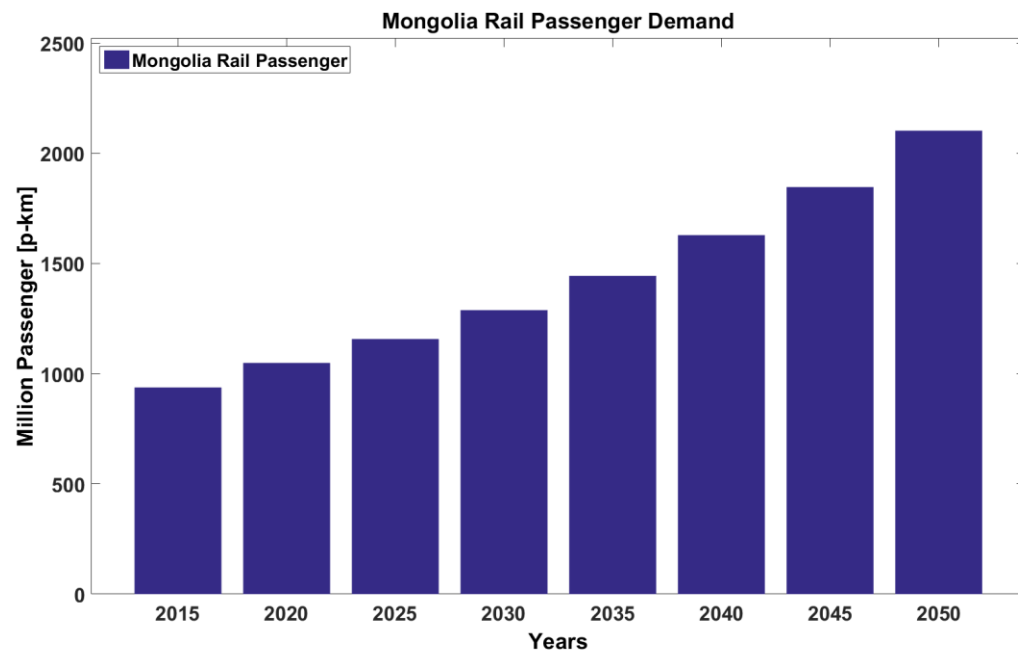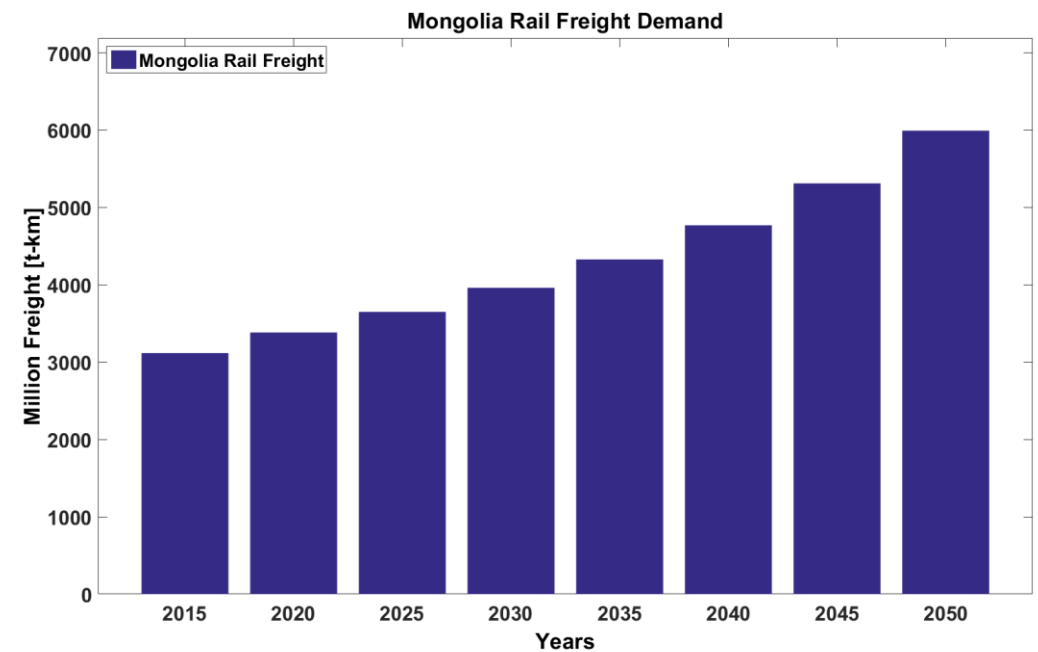

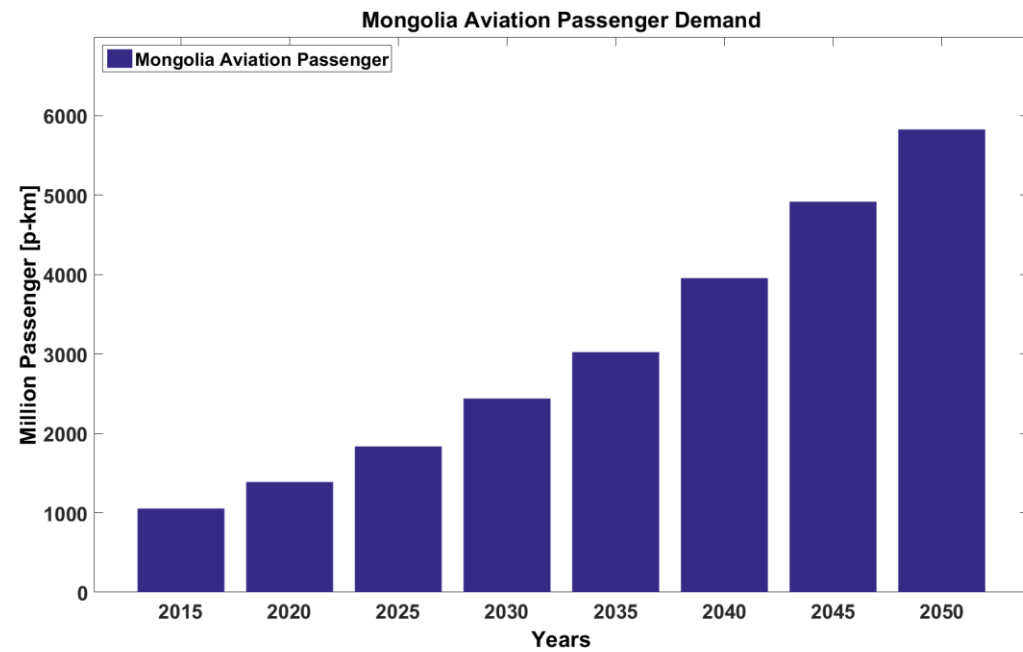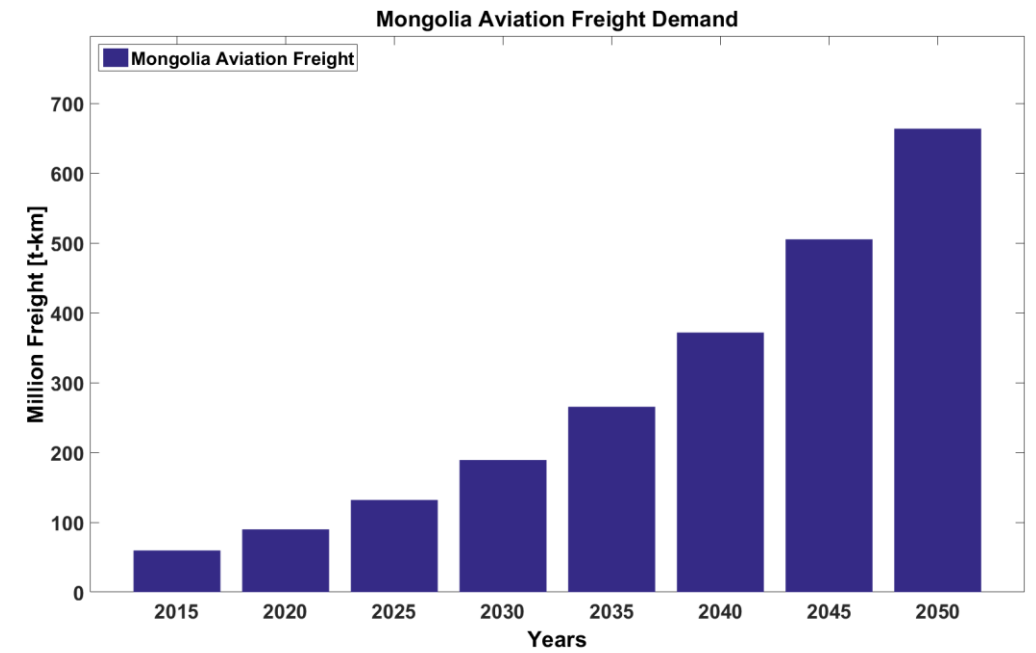

Supplement: s1 [file s1 › Supplementary_Material_Khalili2019_Transportation_Demand_3.pdf]
