# Supplementary material
Source: MDPI journal article supplement (https://www.mdpi.com/1996-1073/12/20/3870)

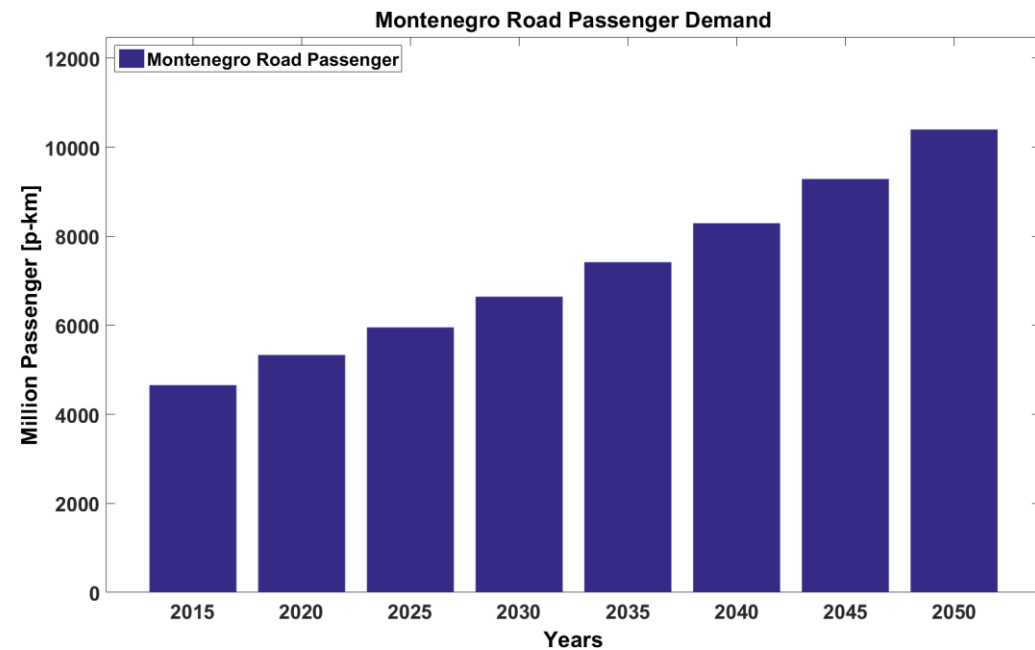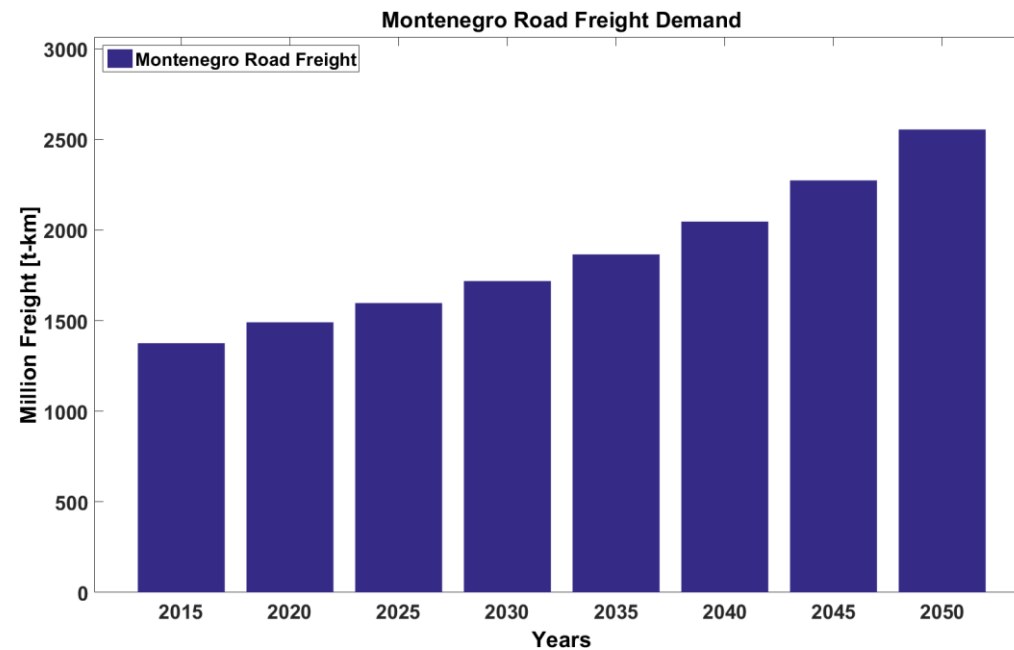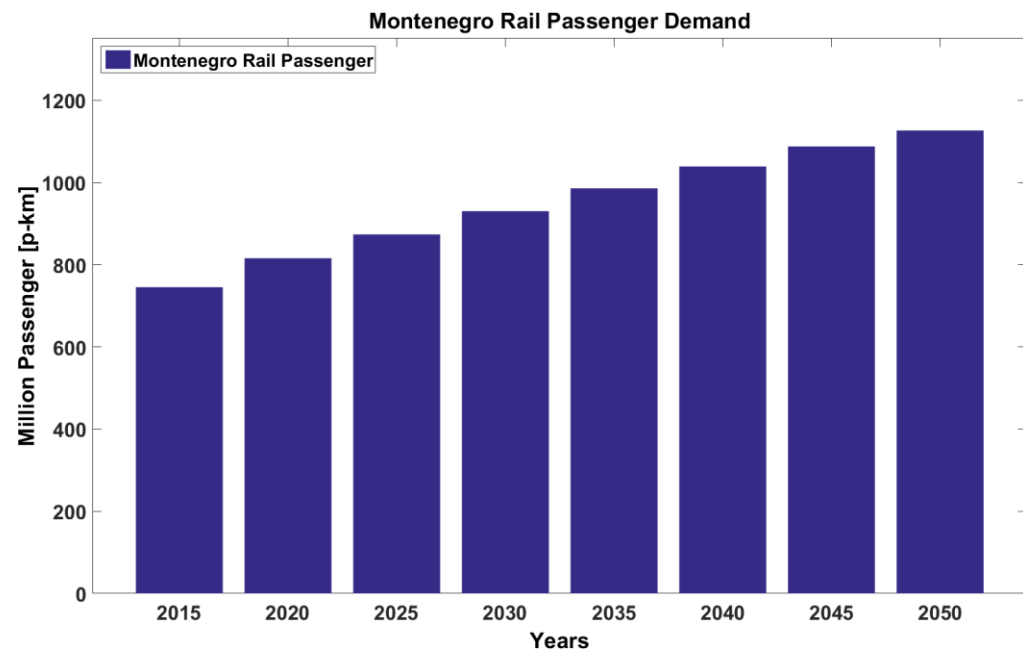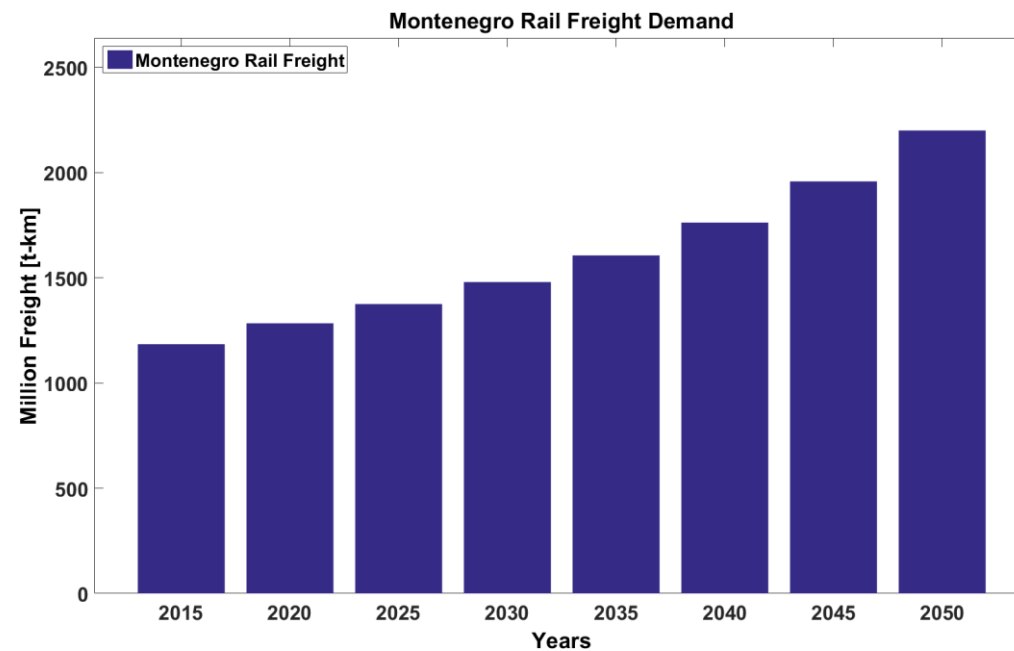

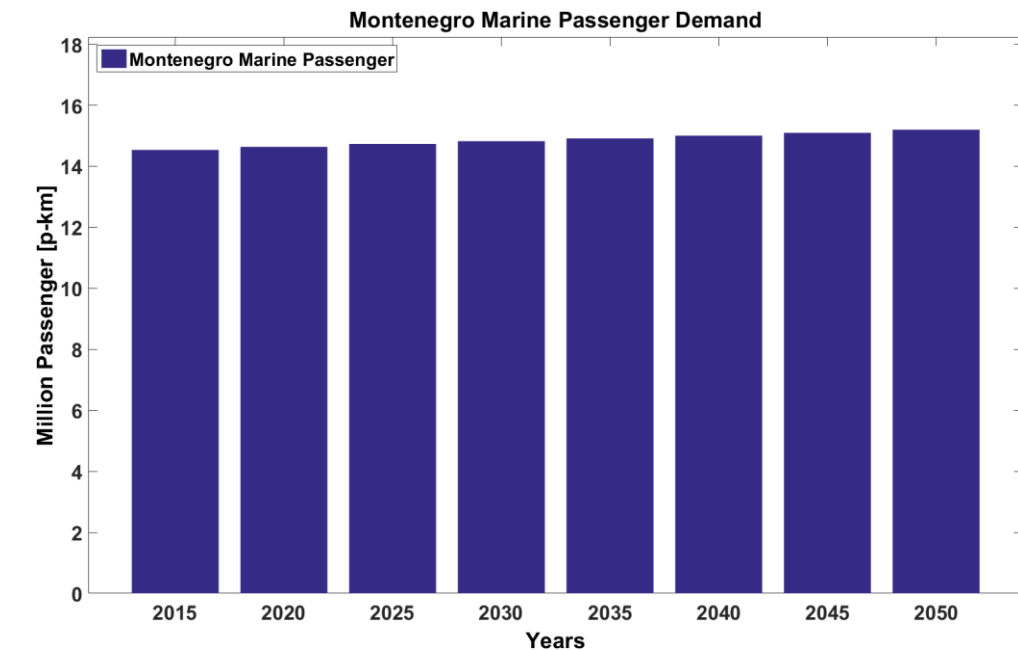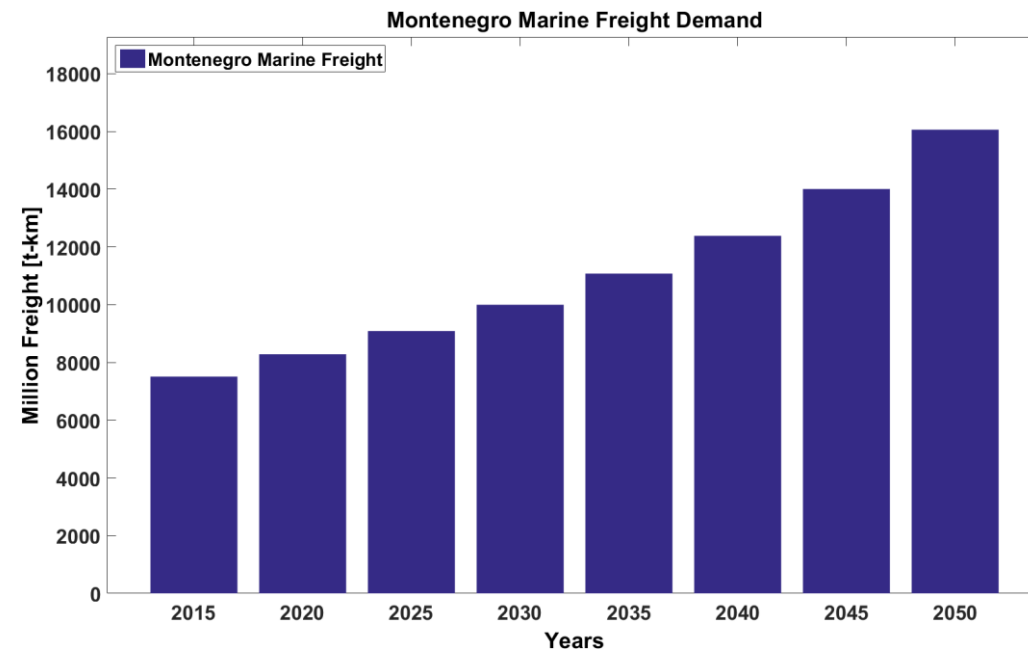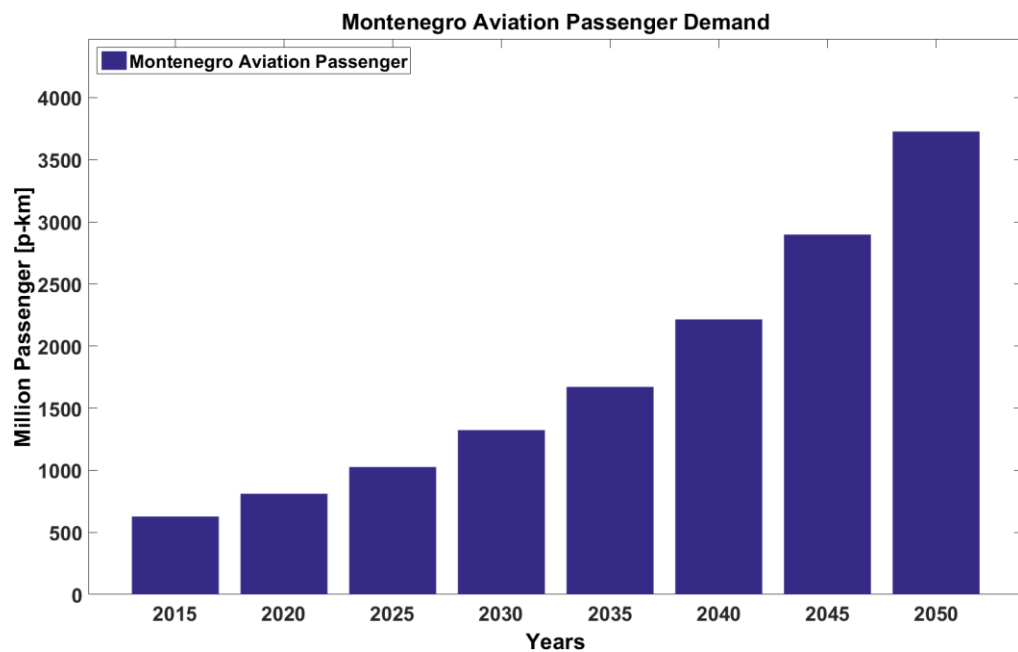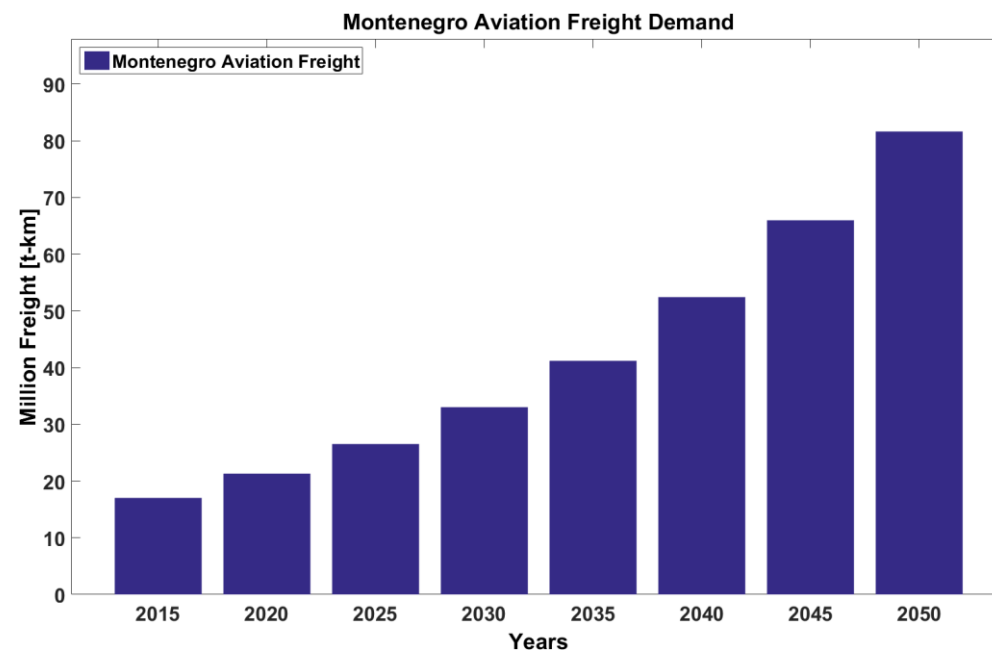

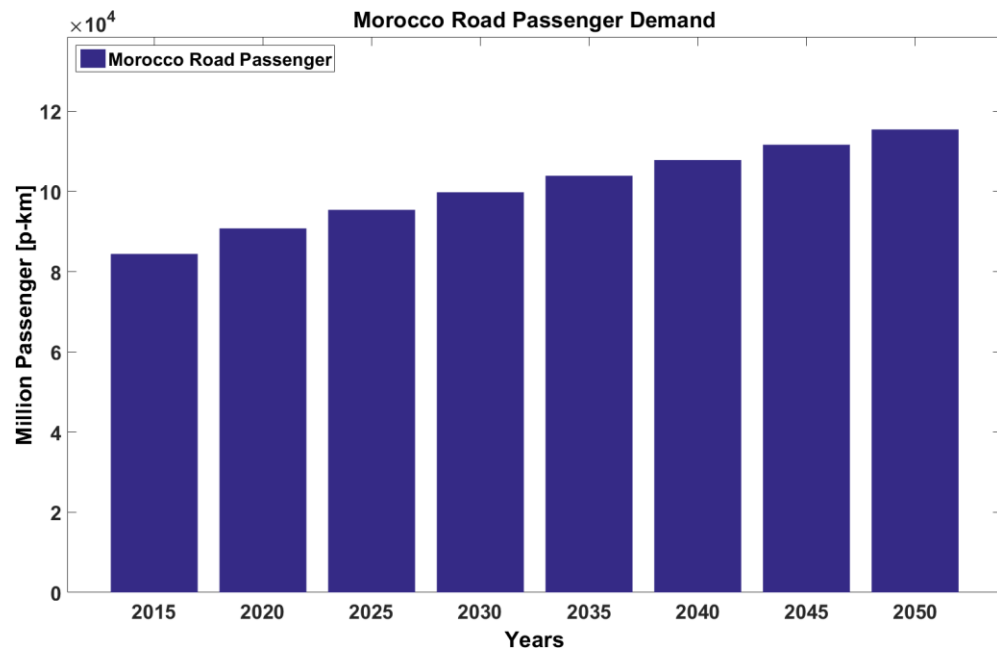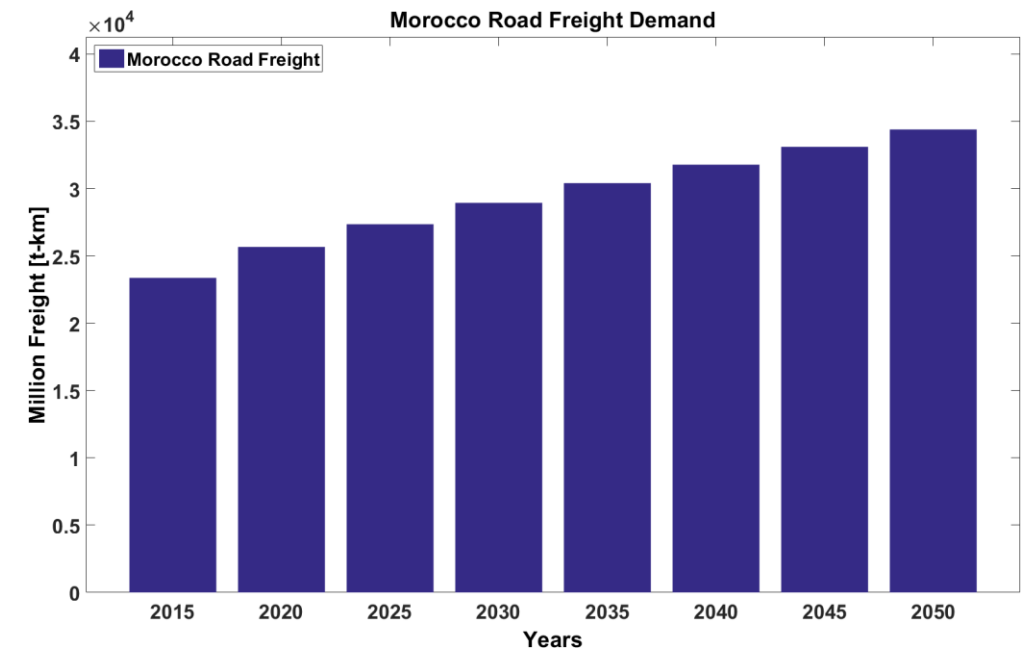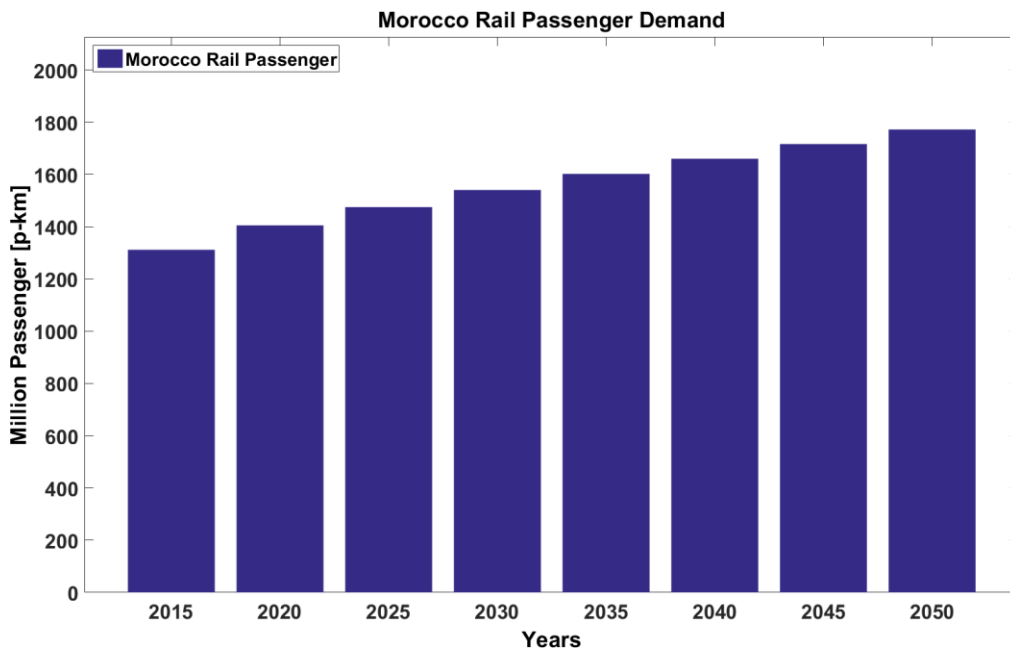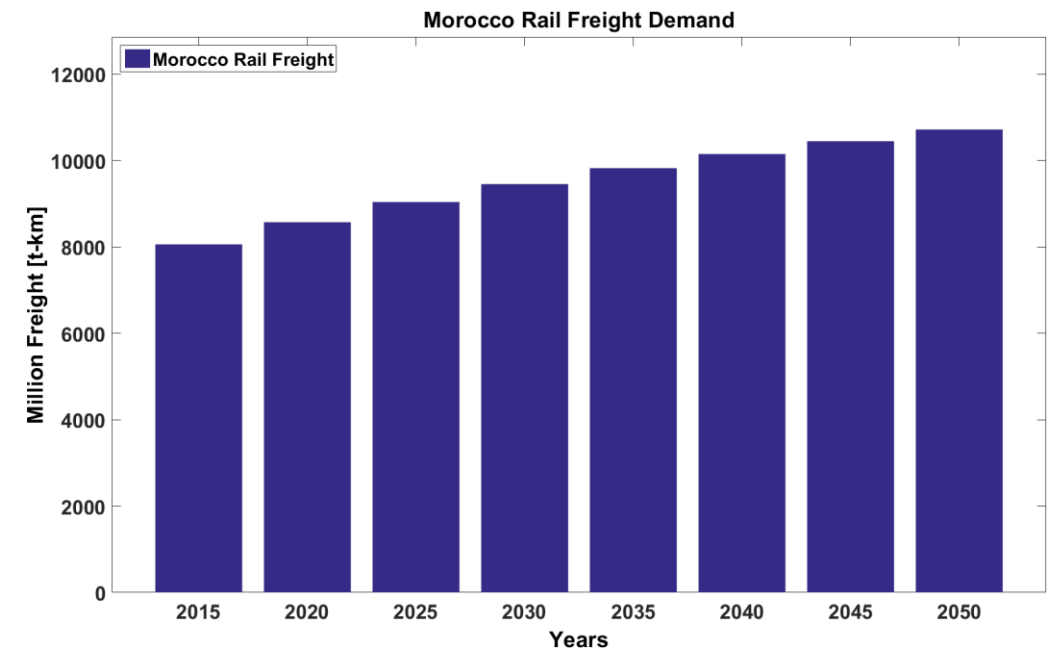

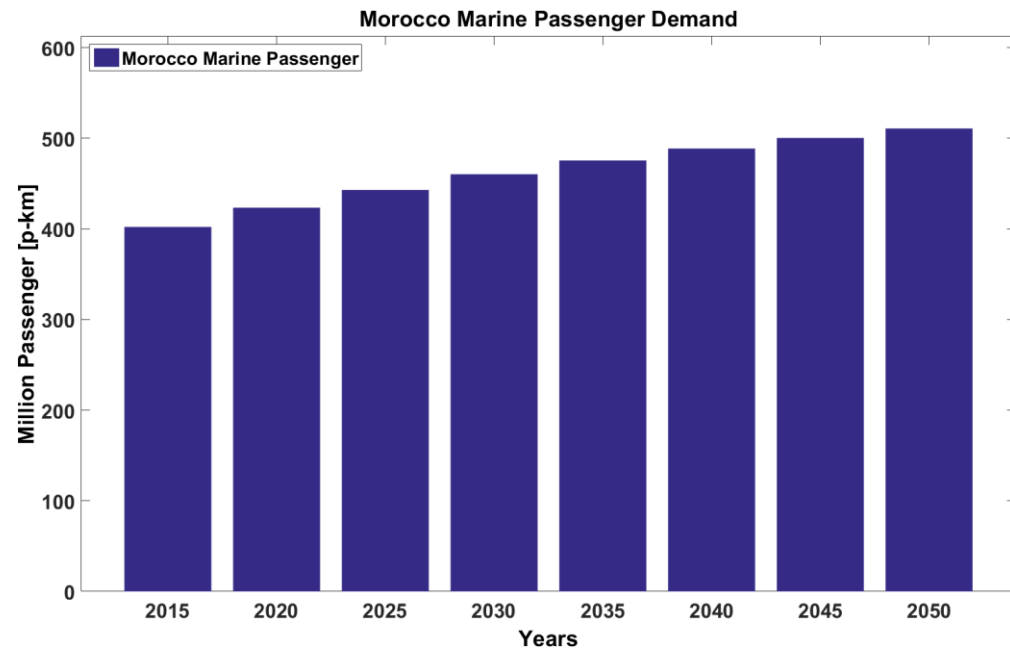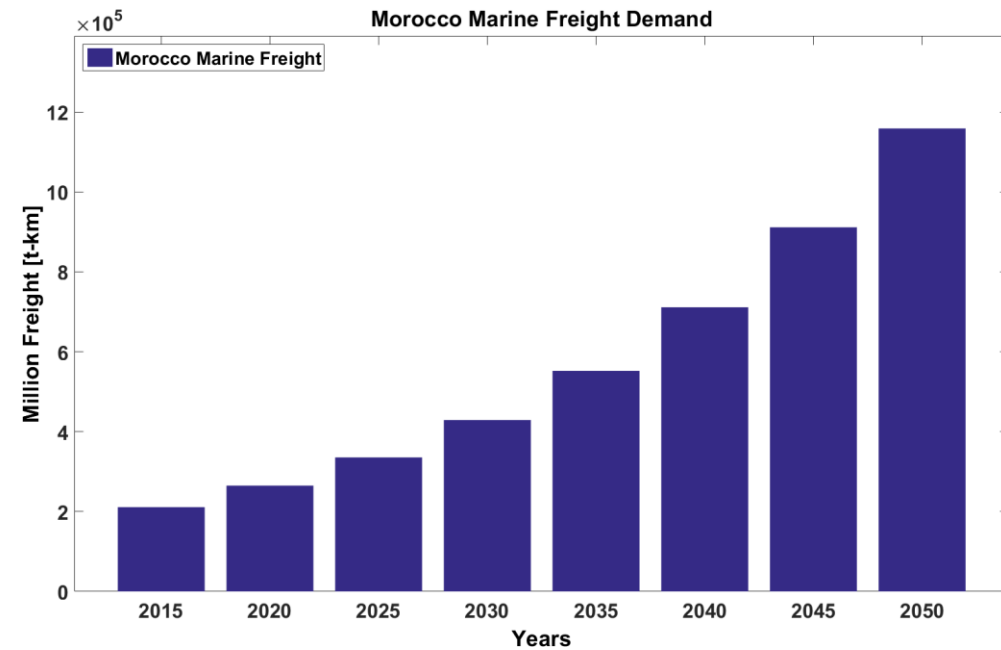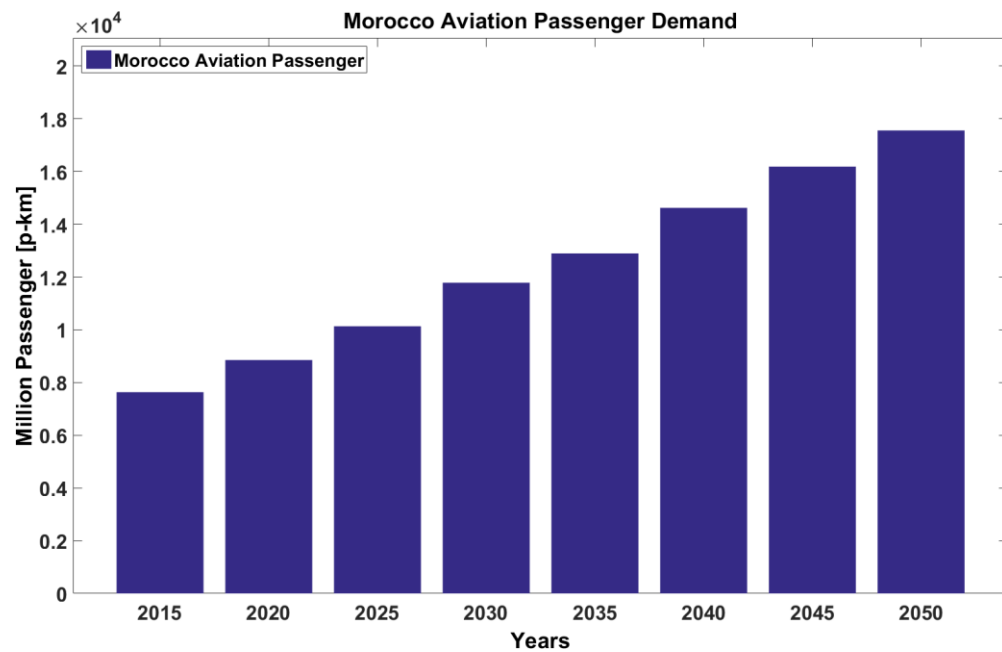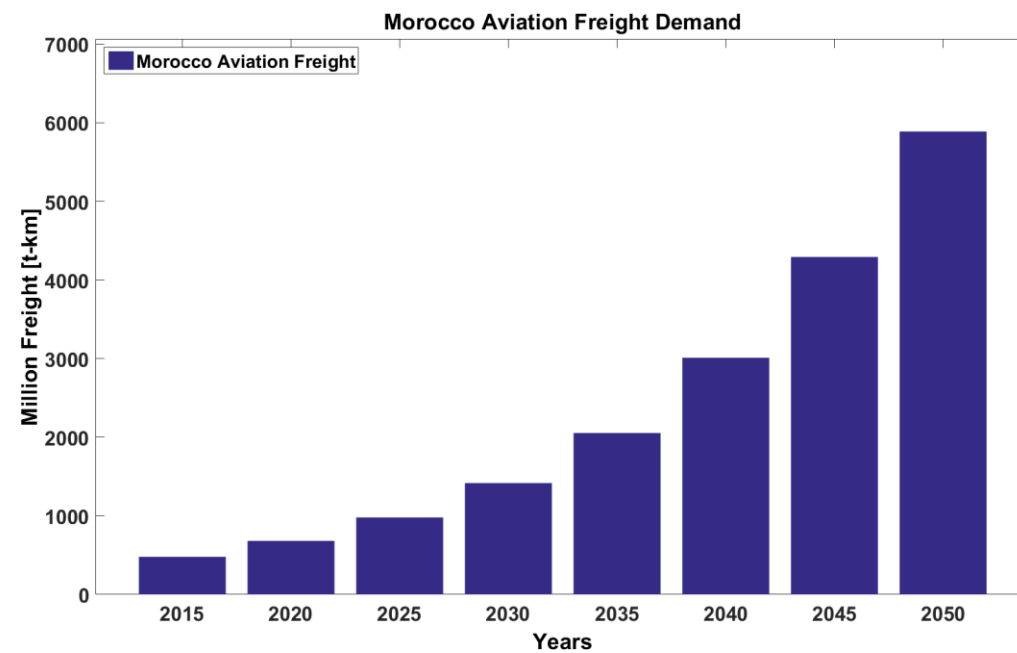

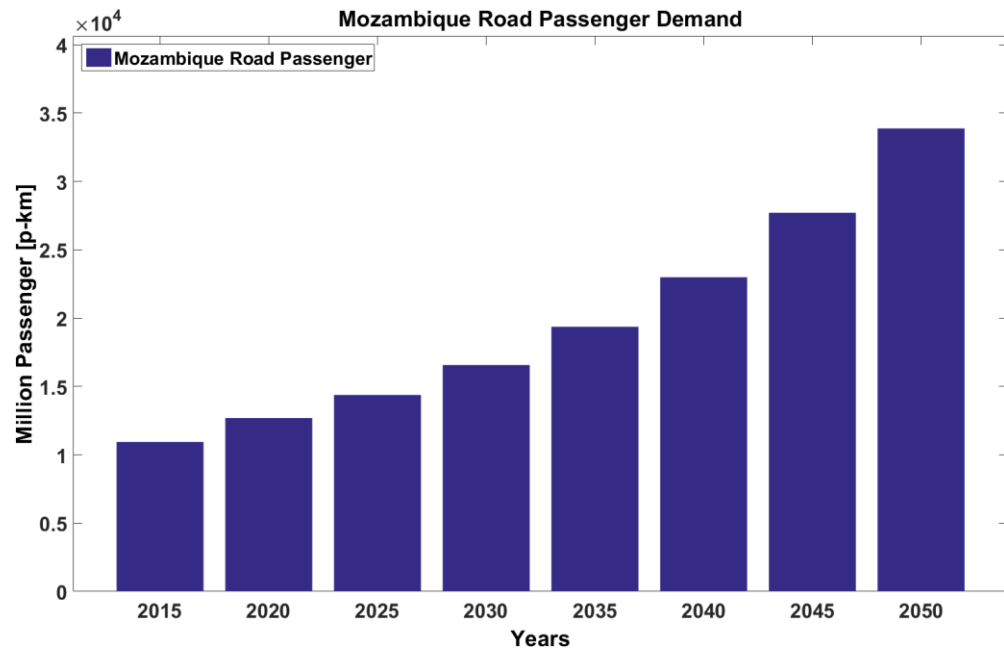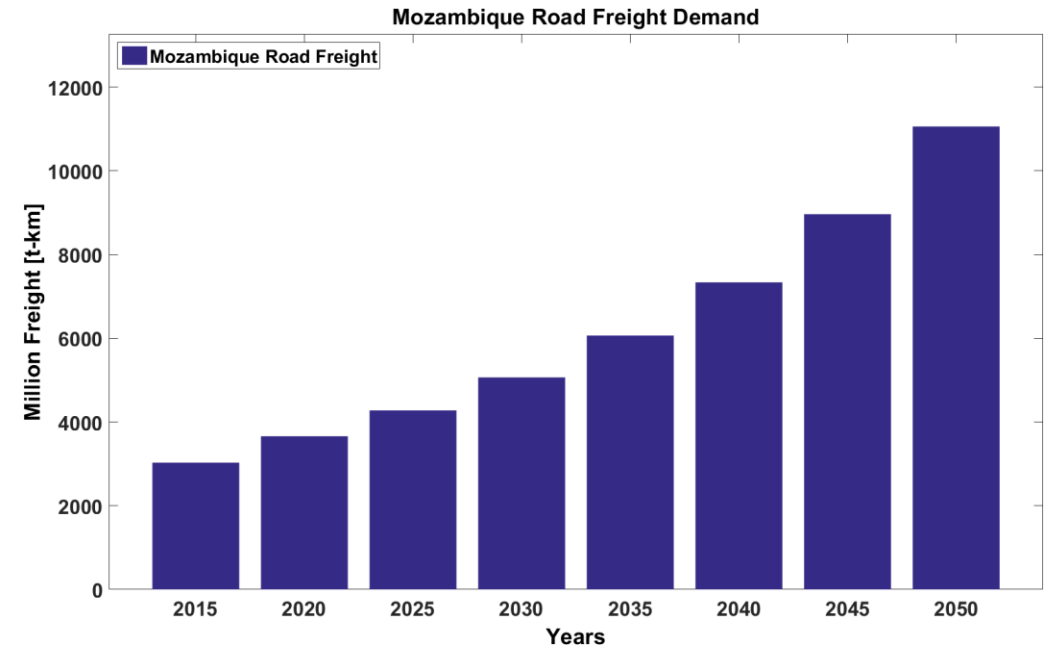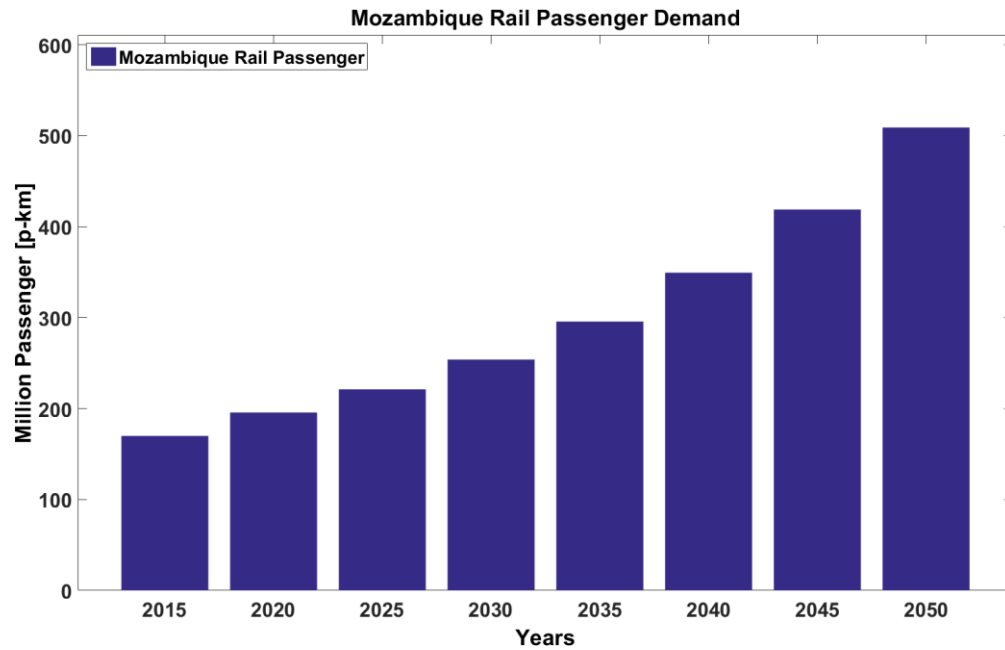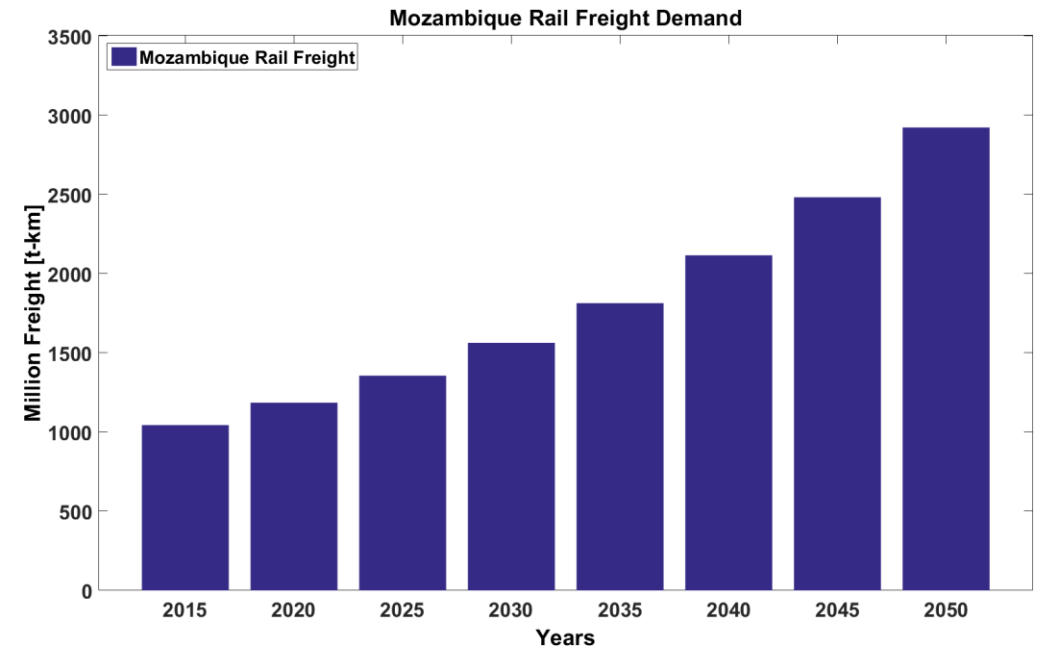

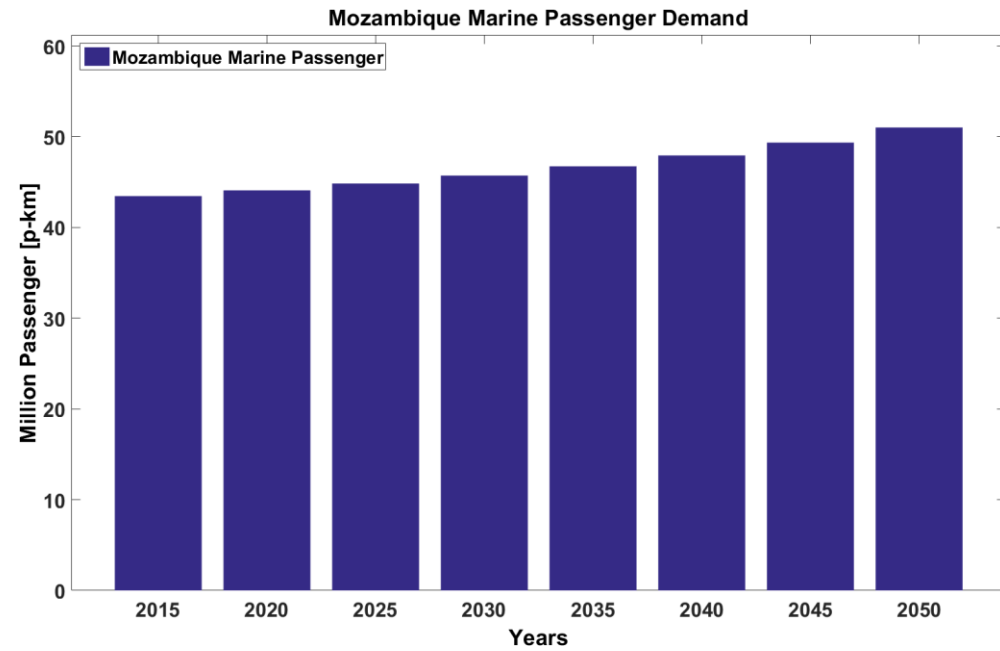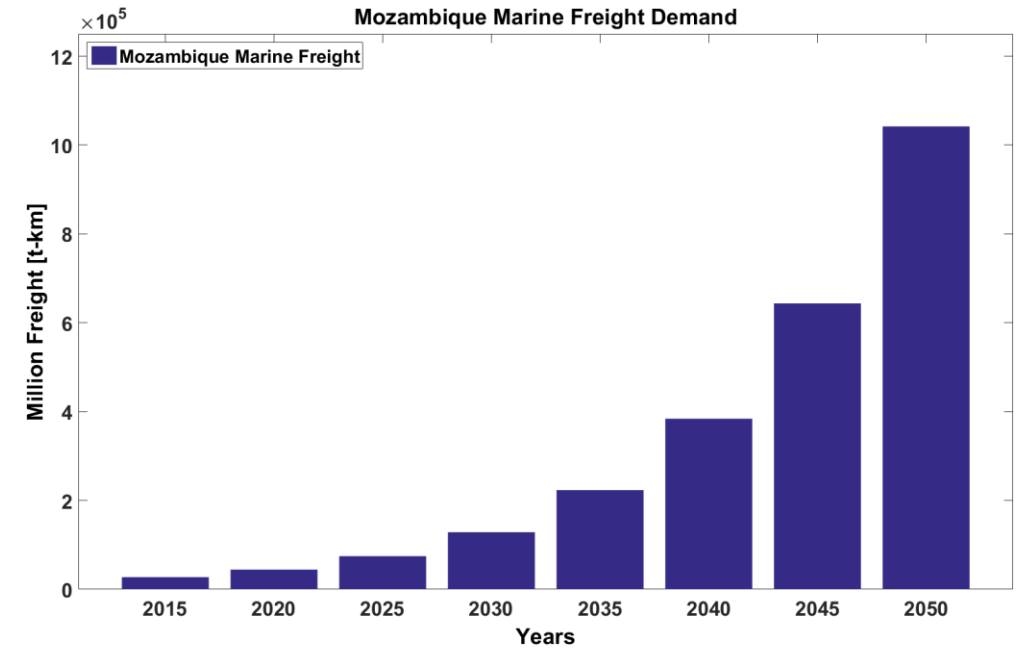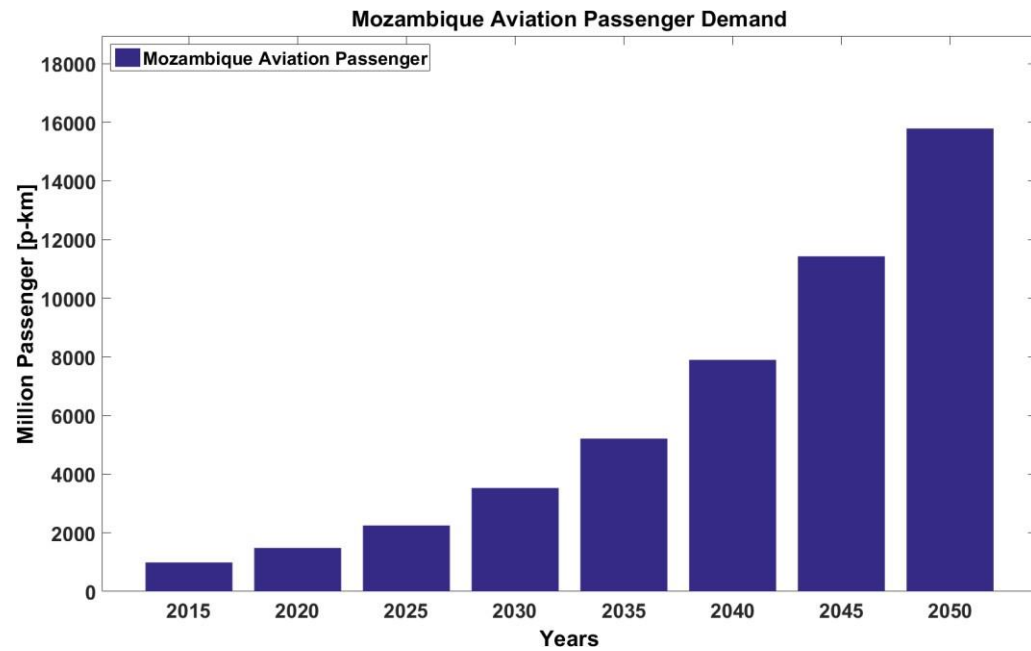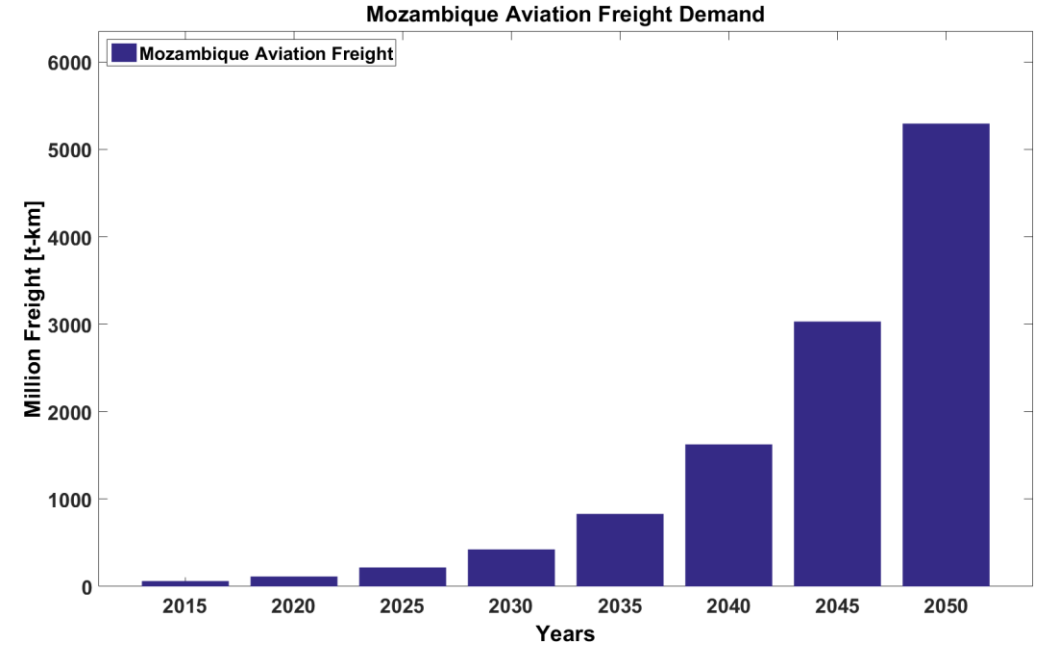

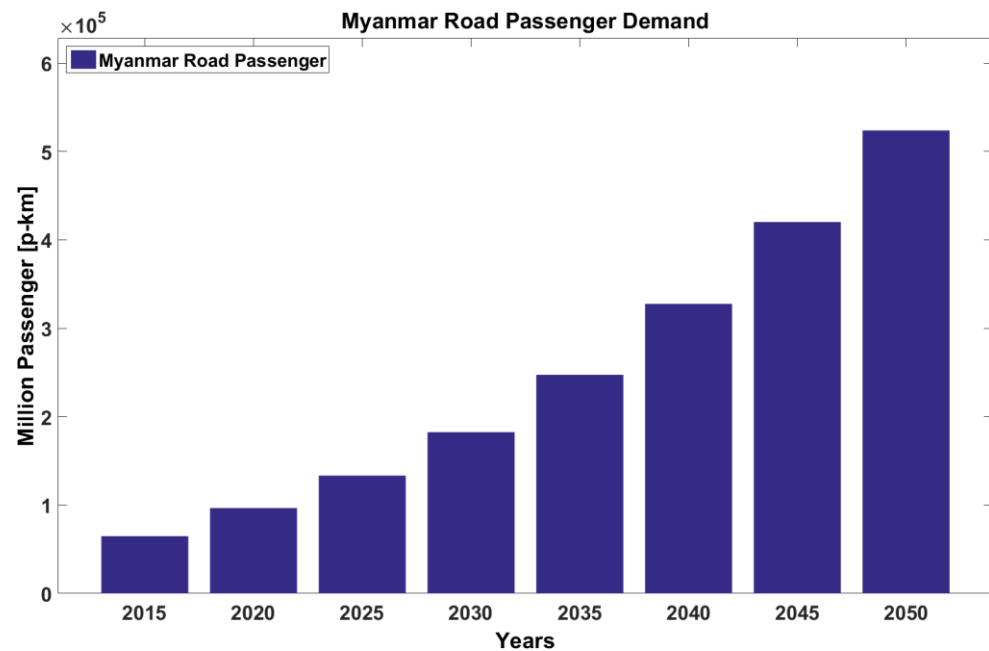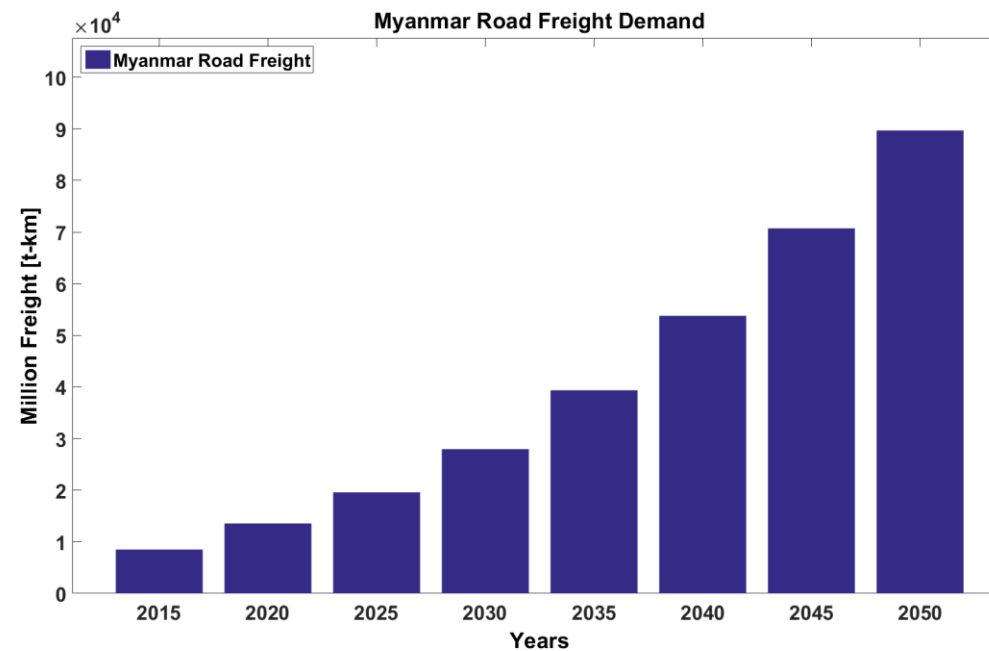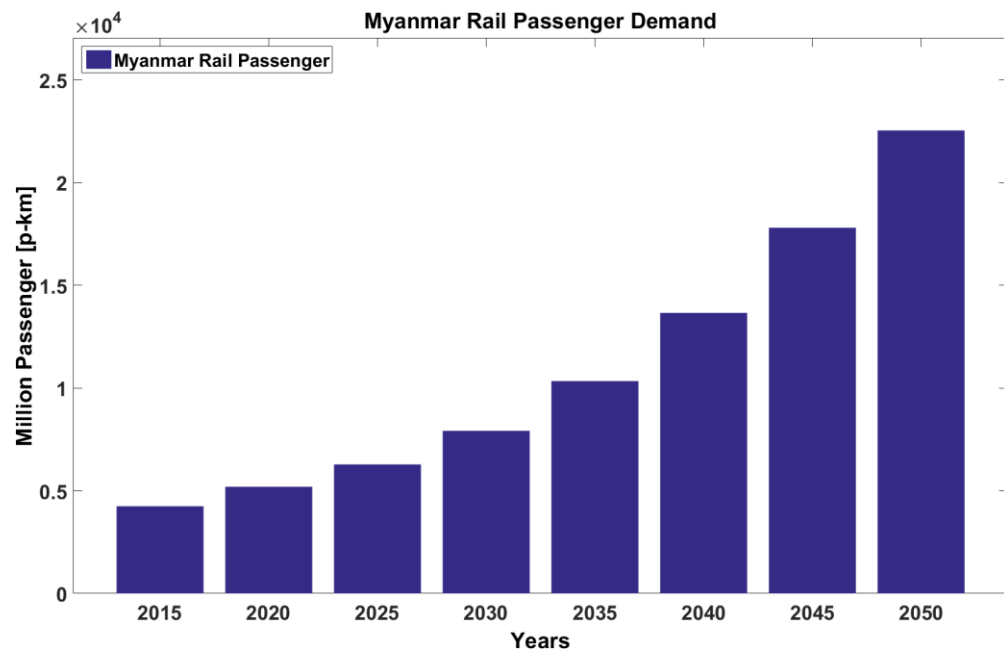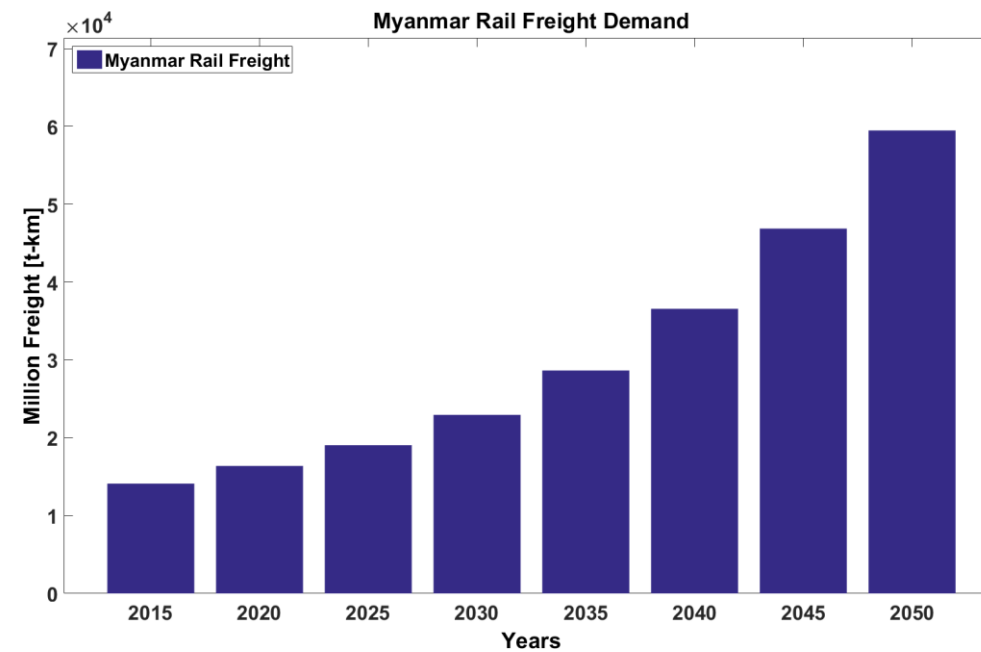

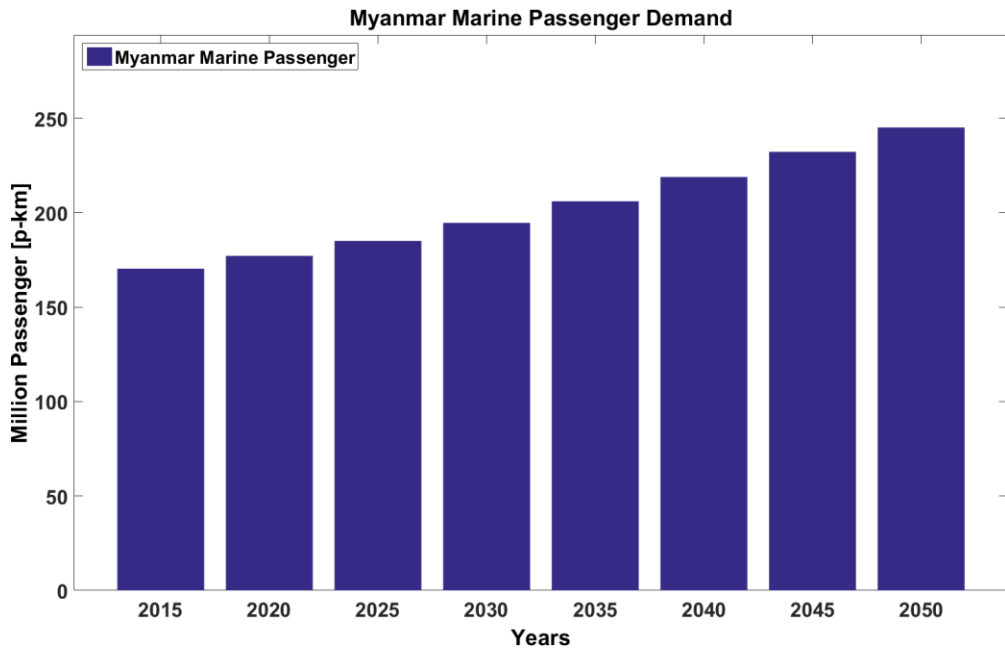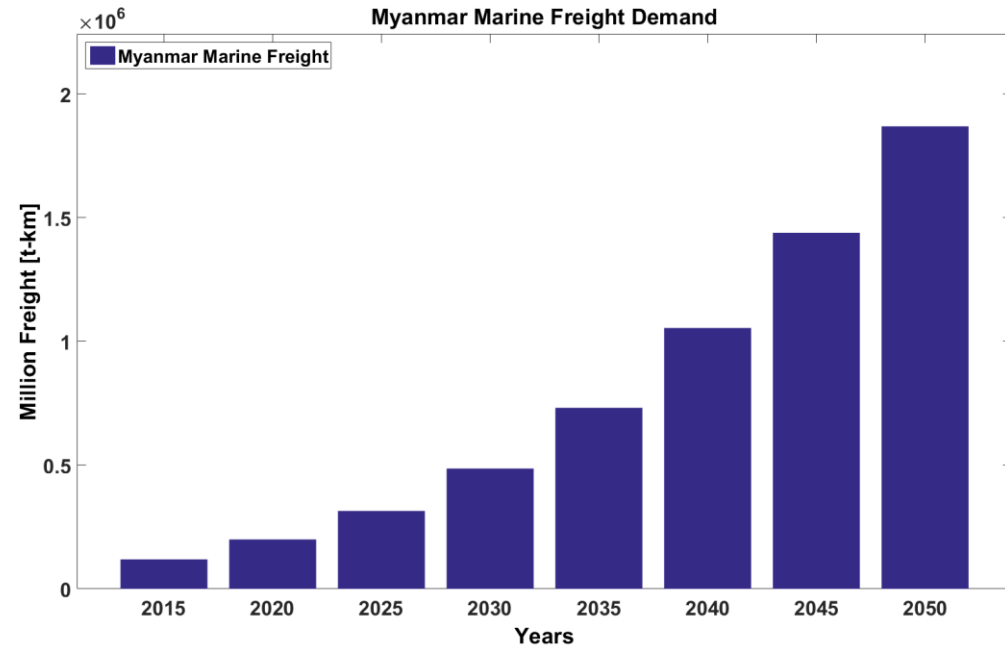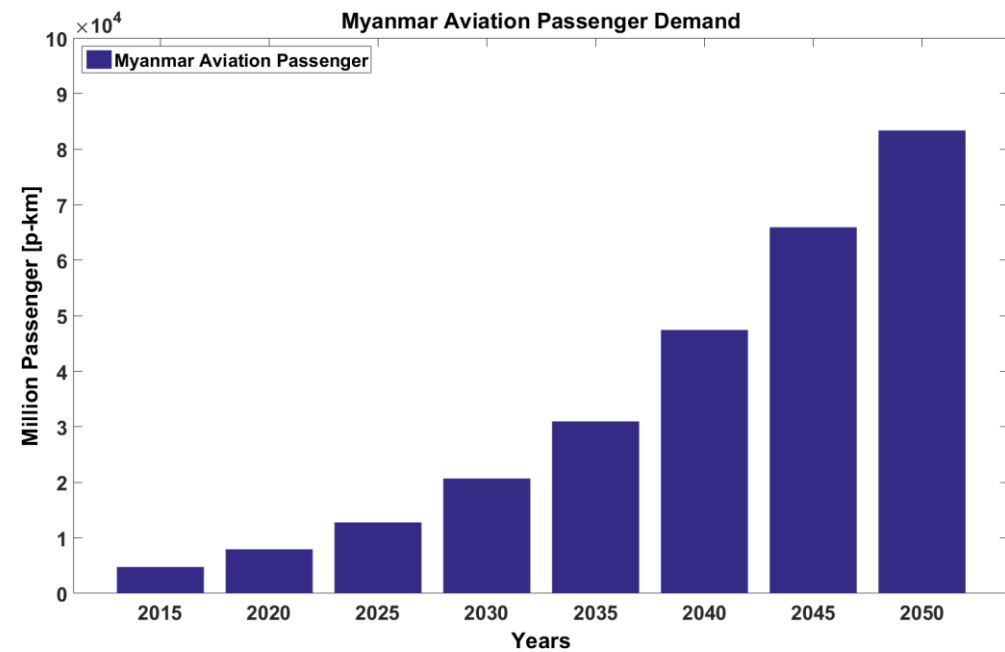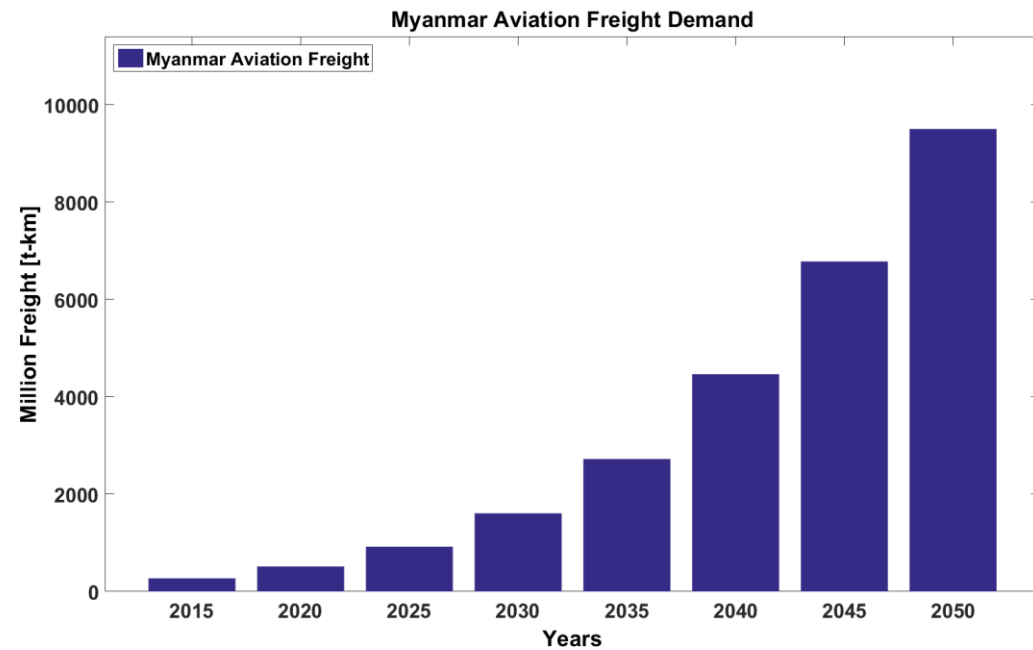

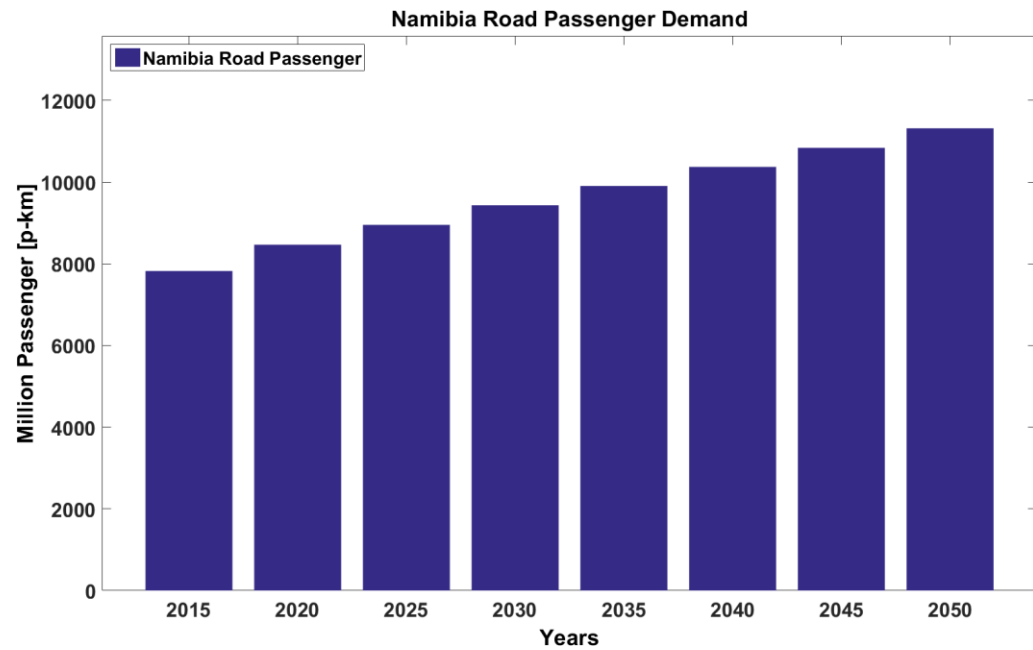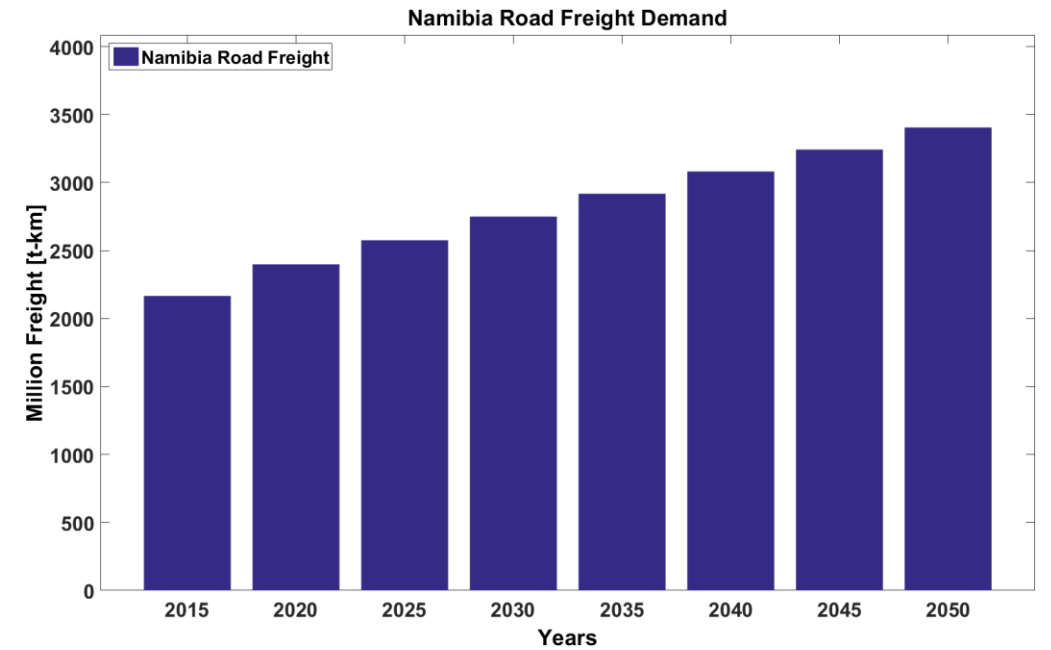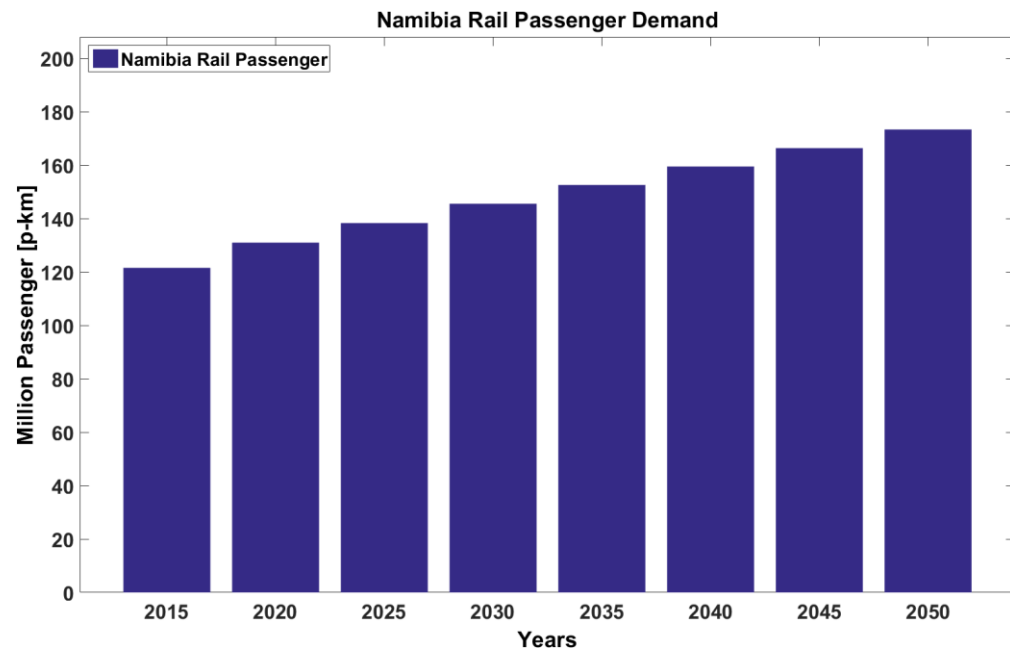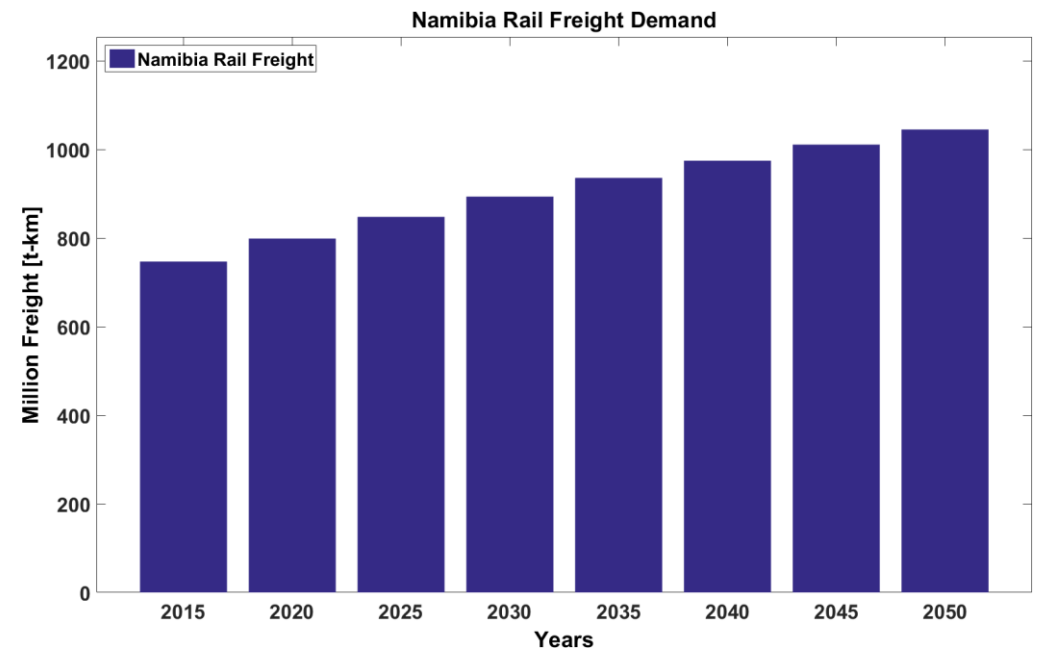

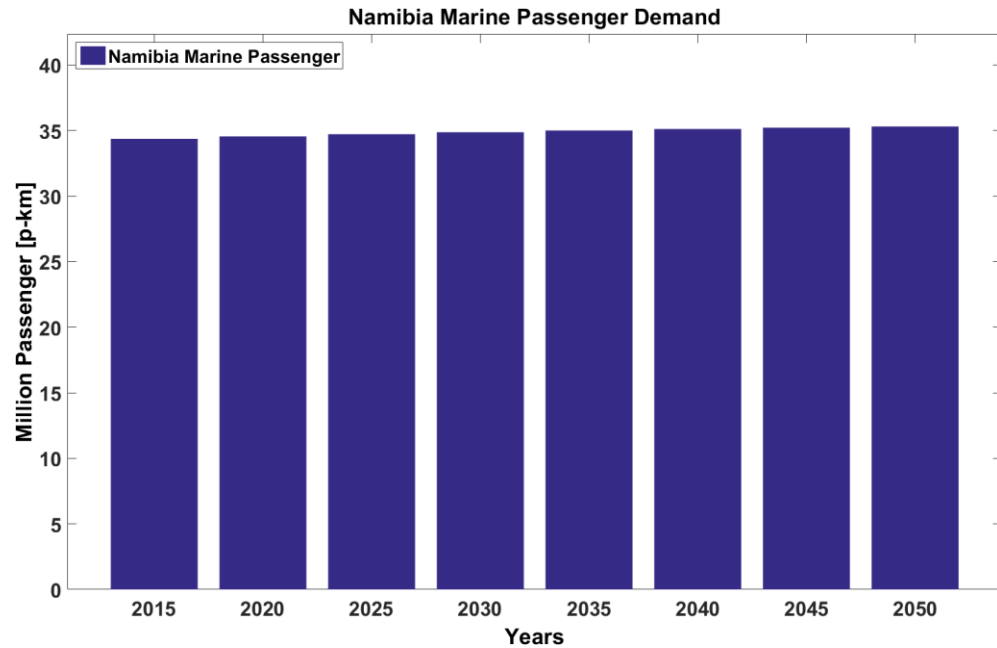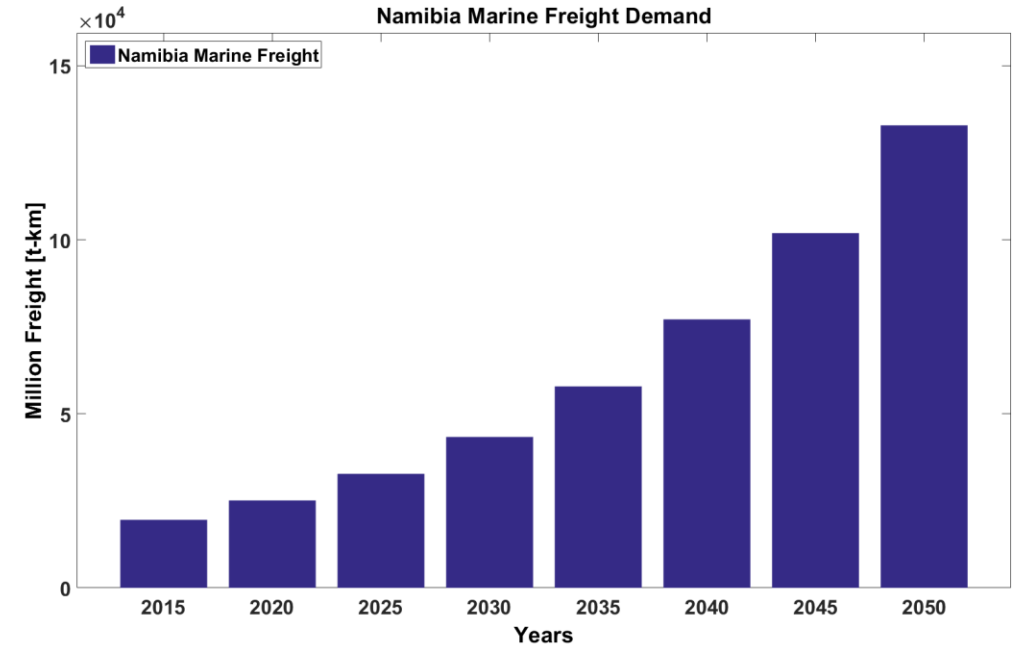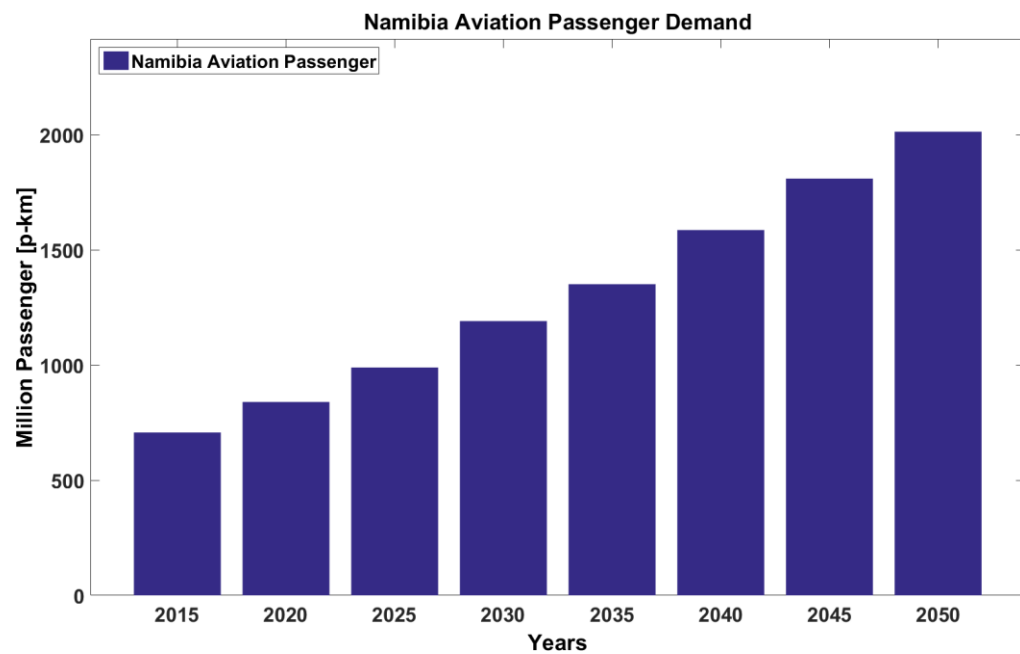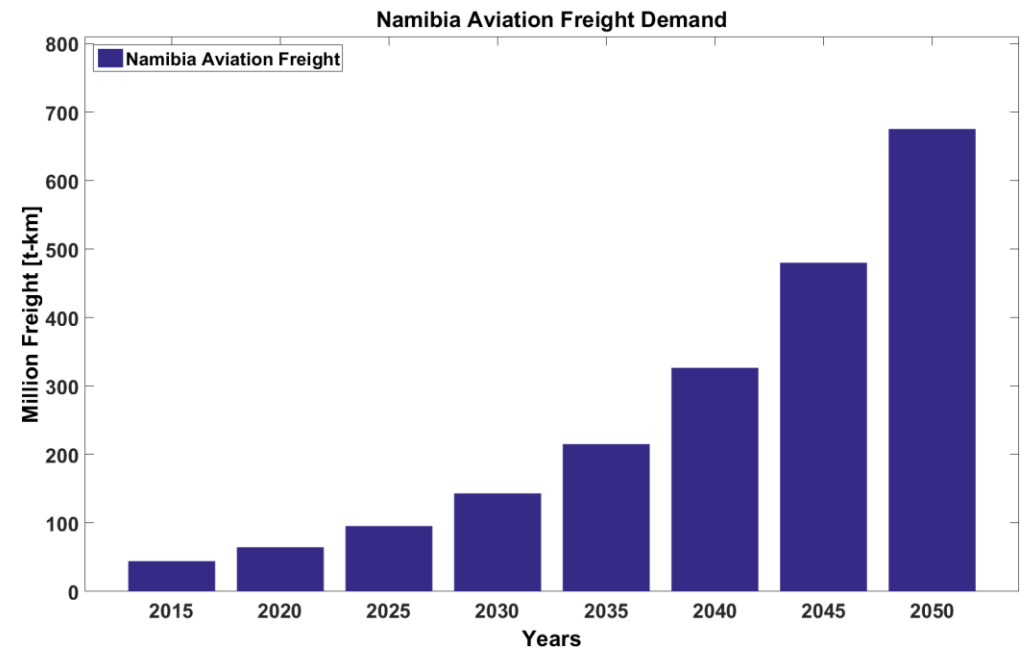

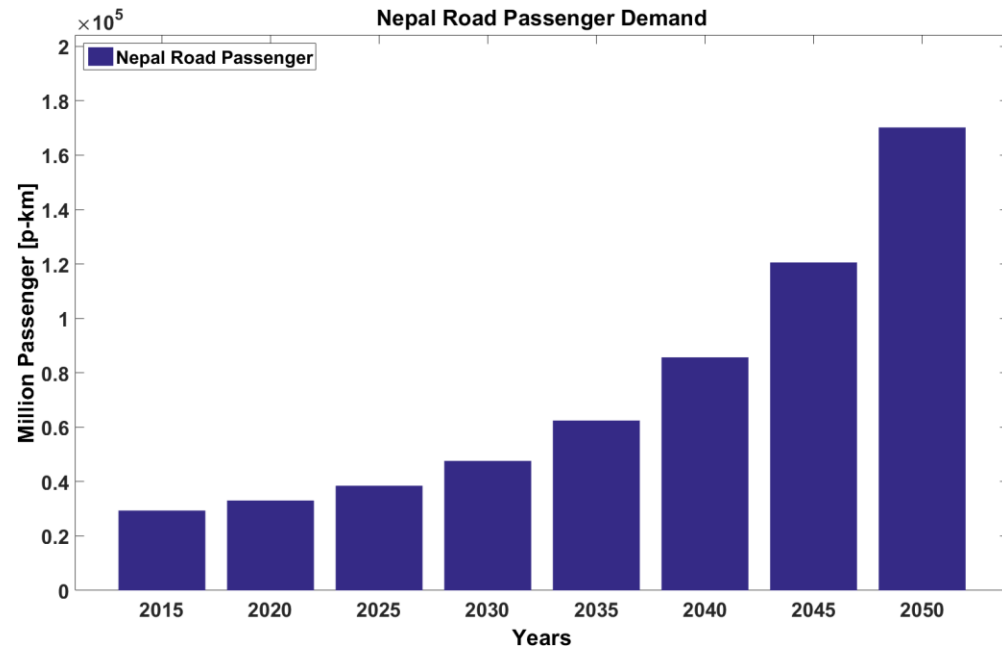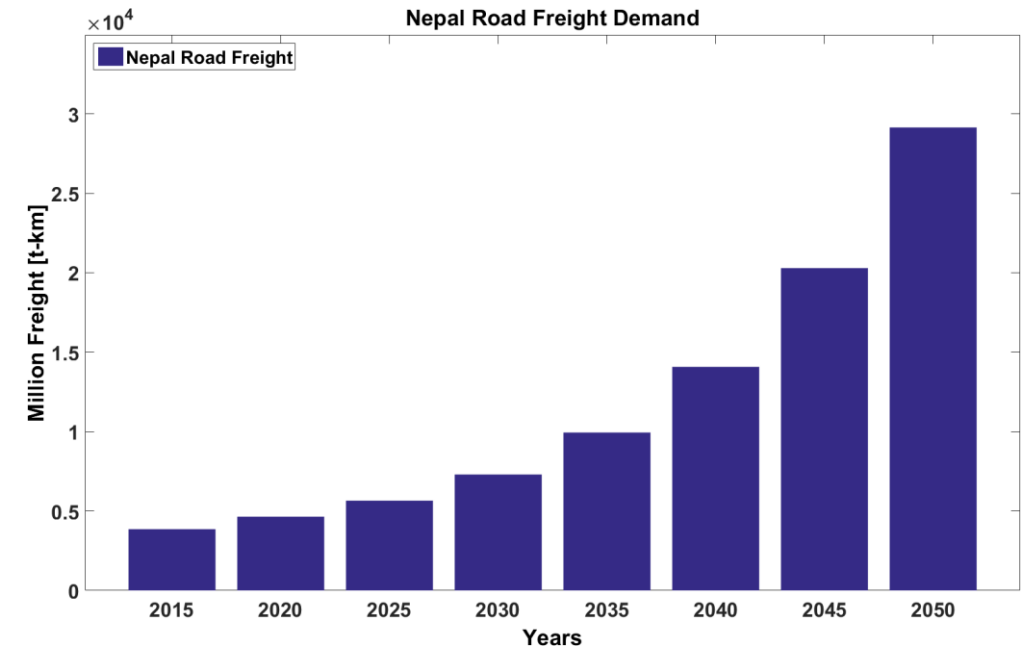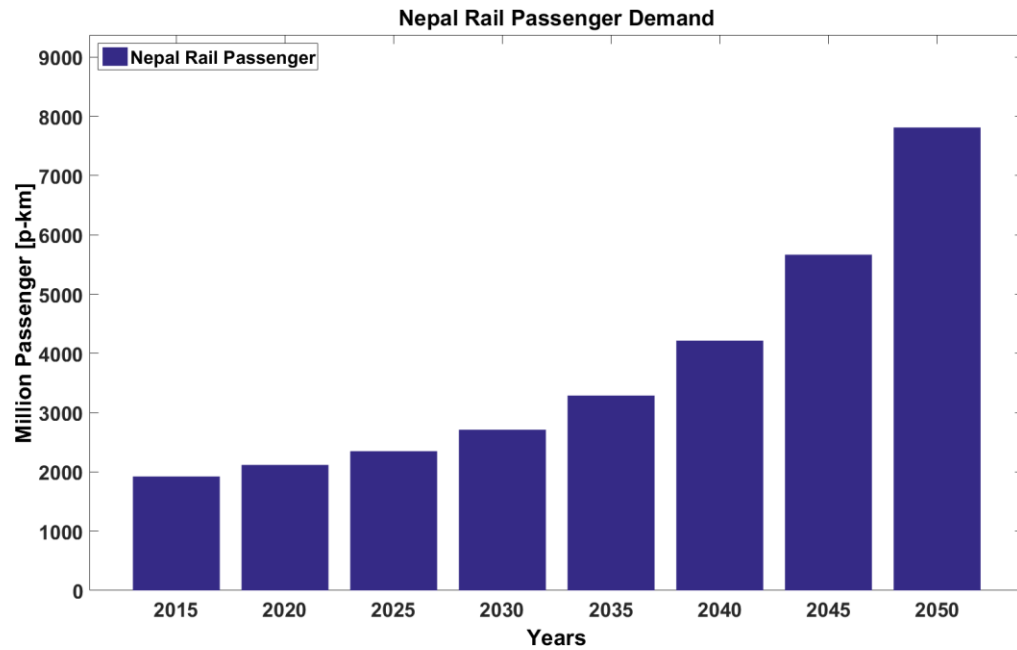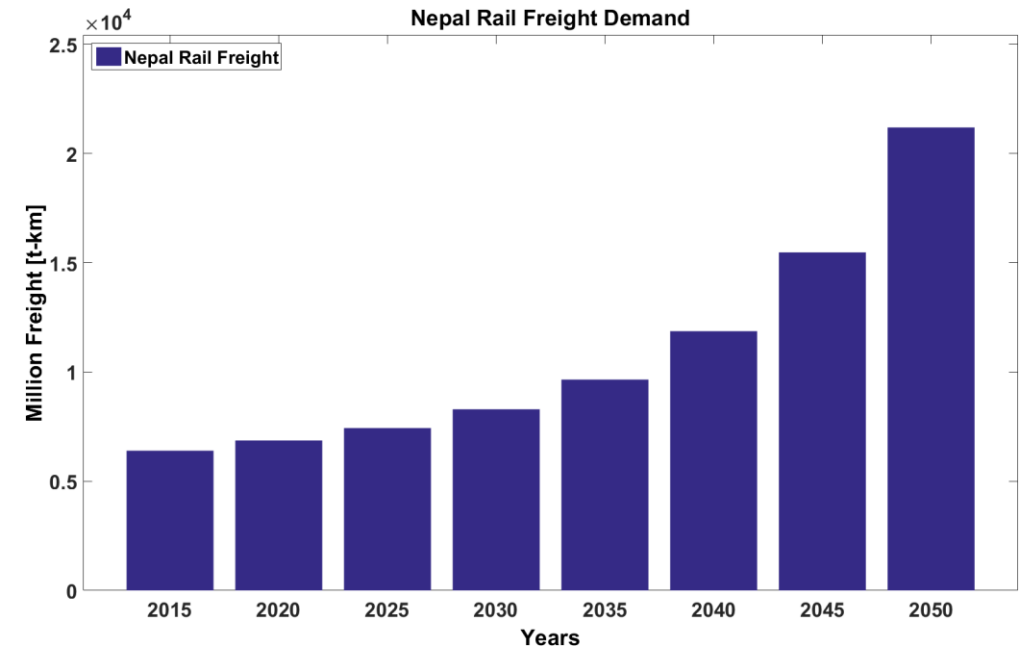

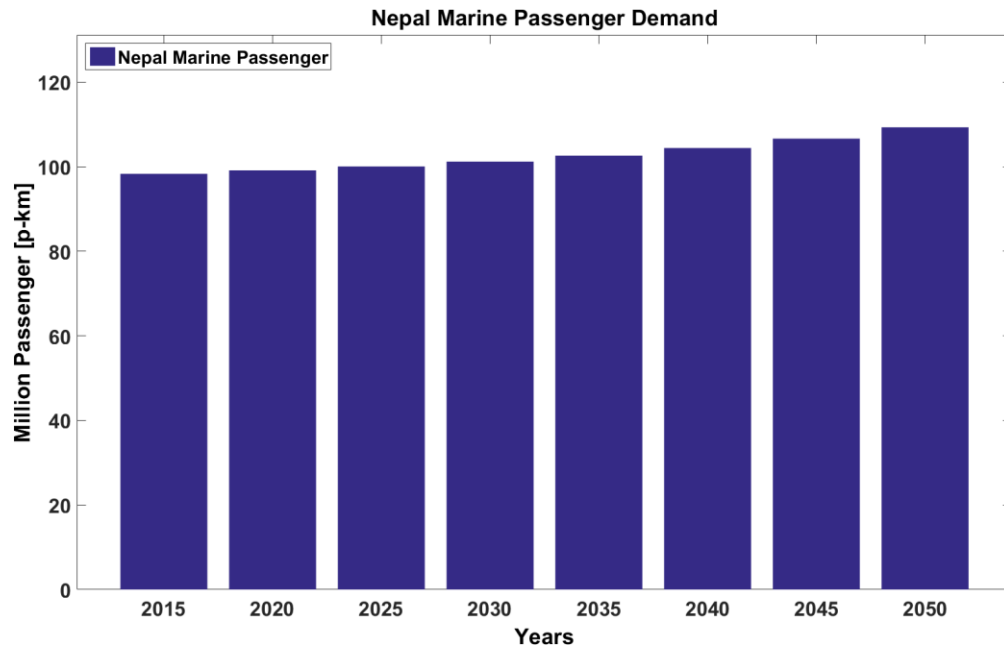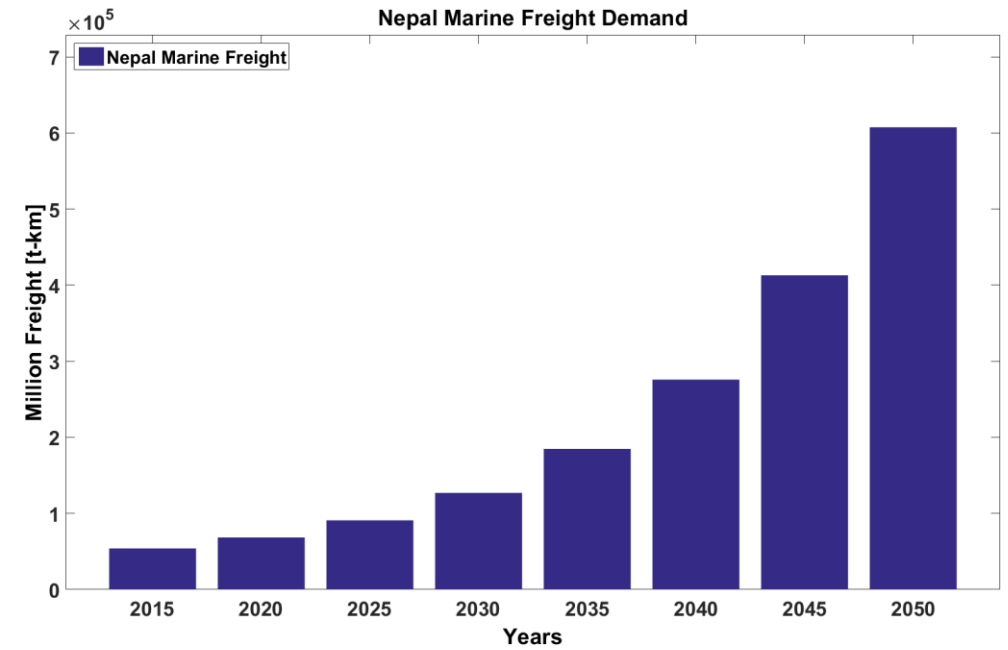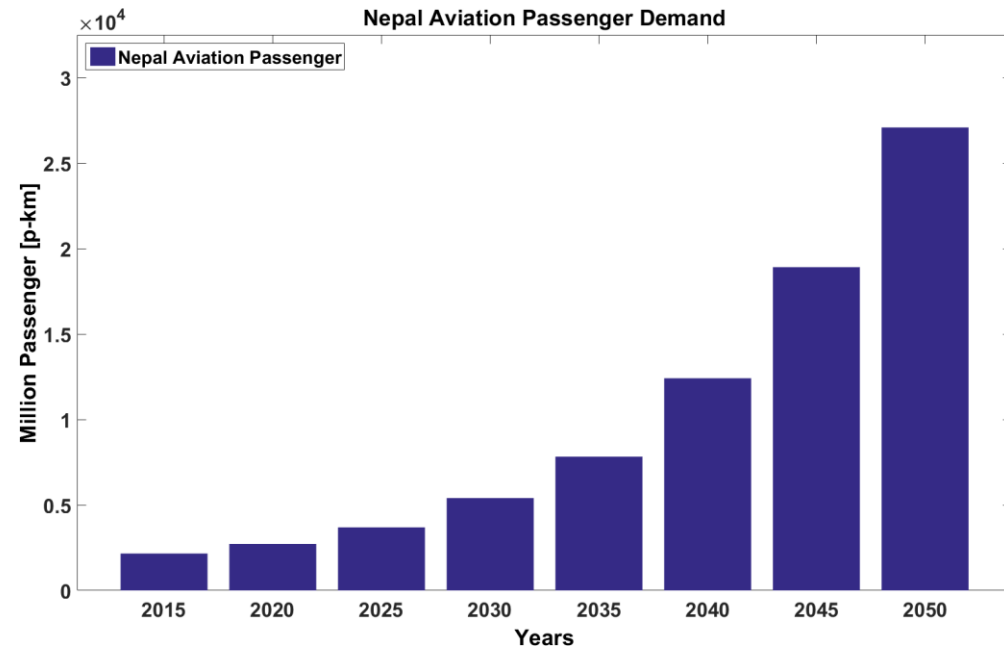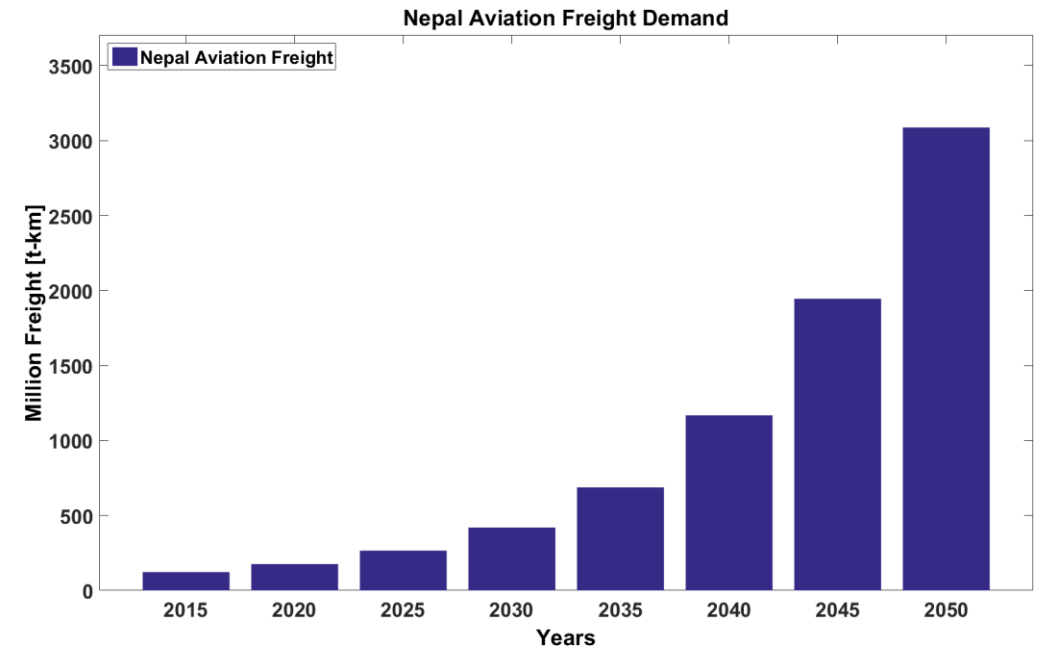

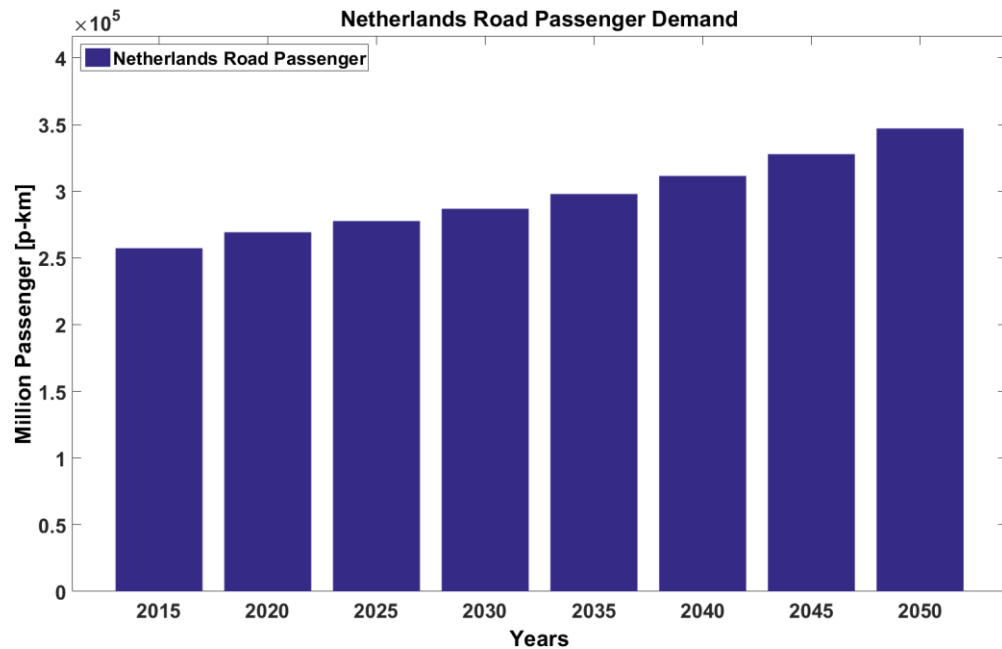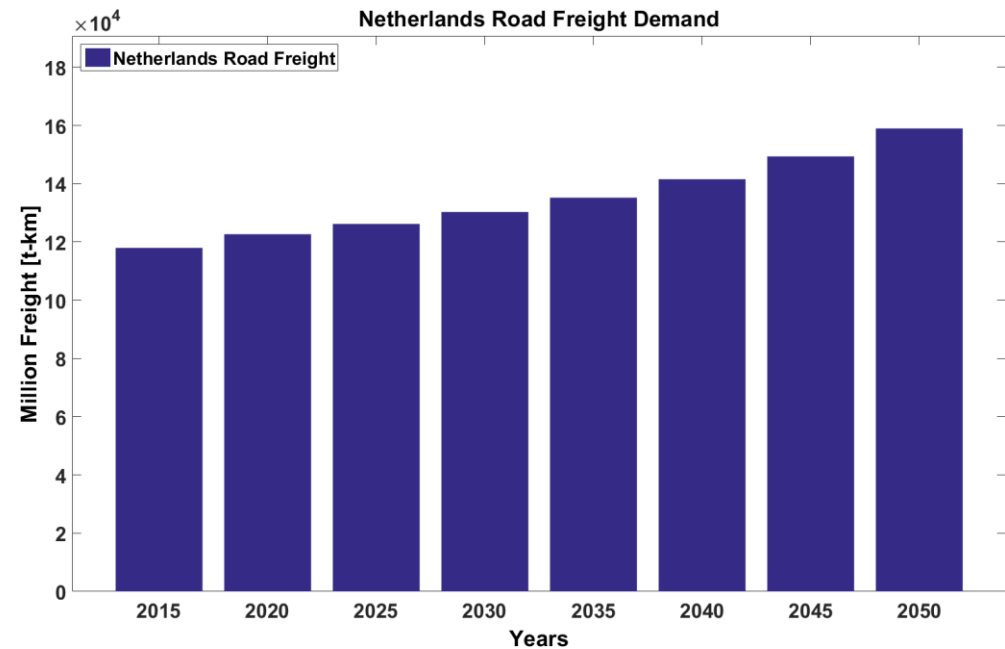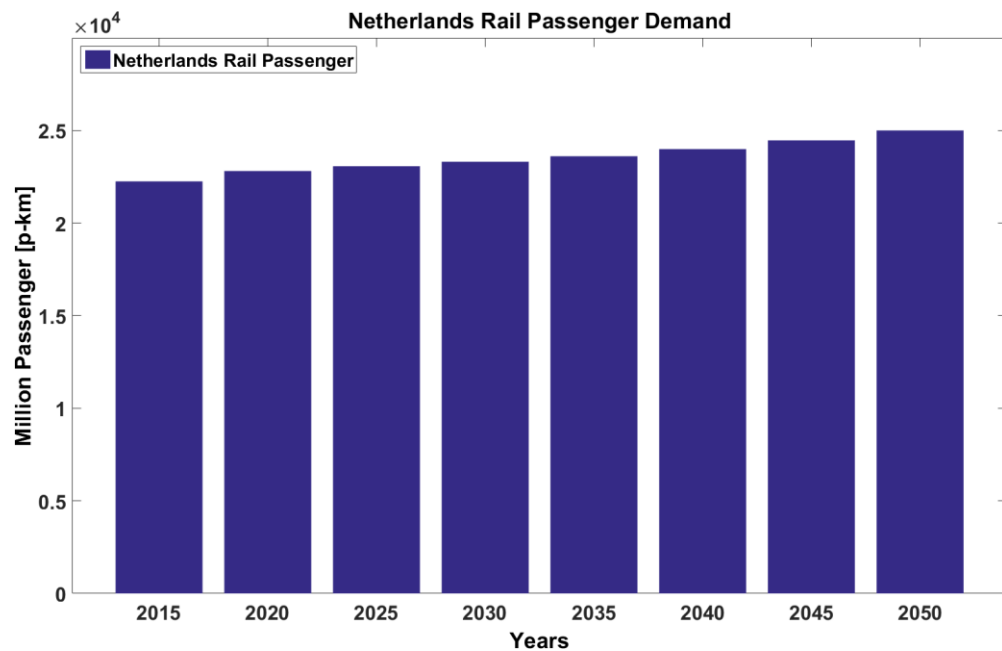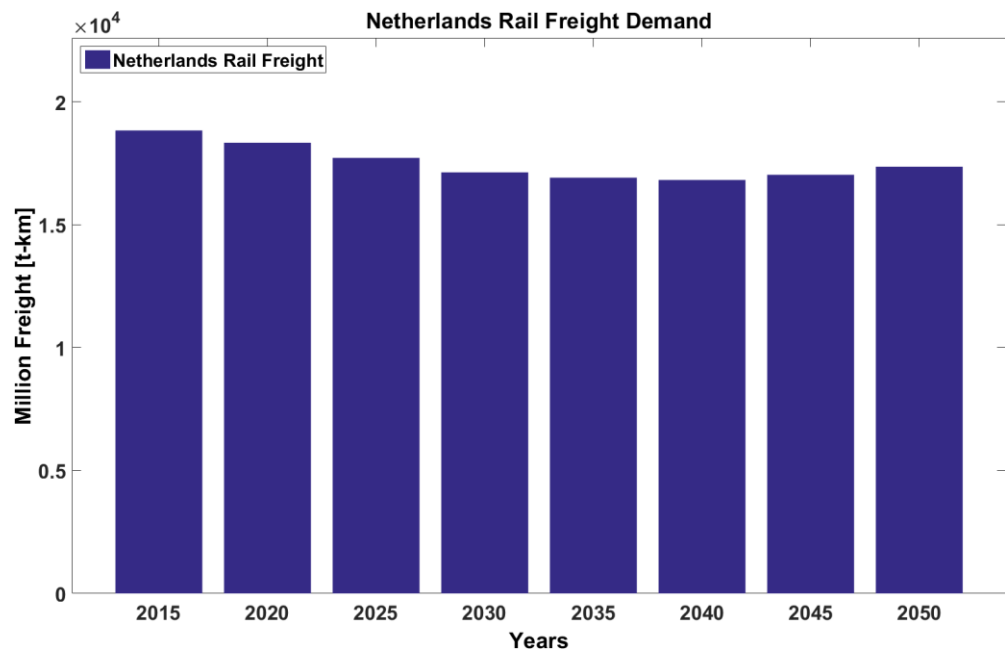

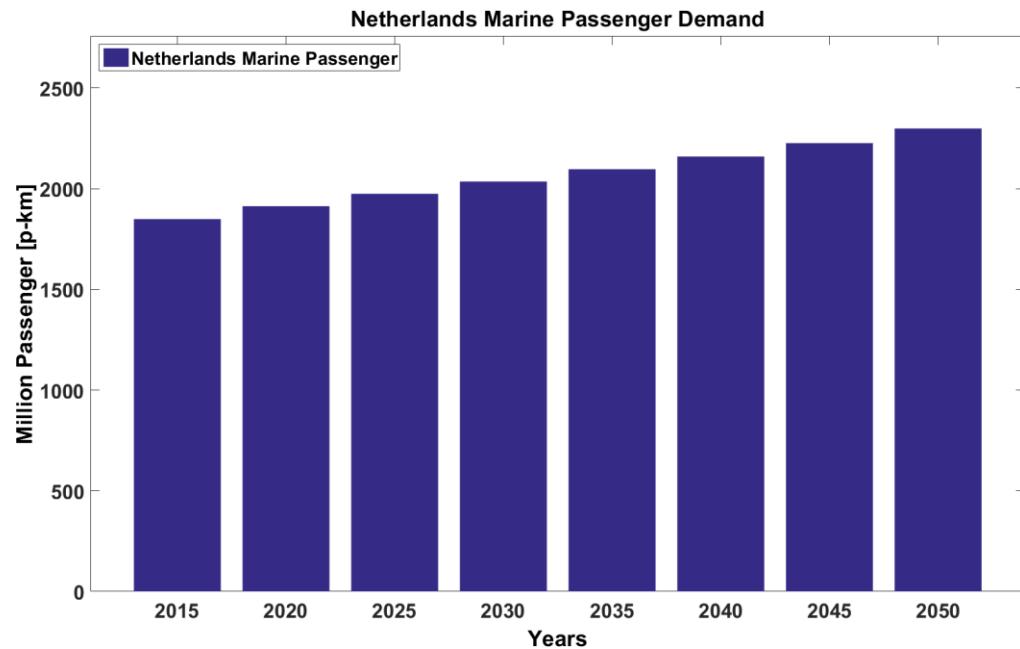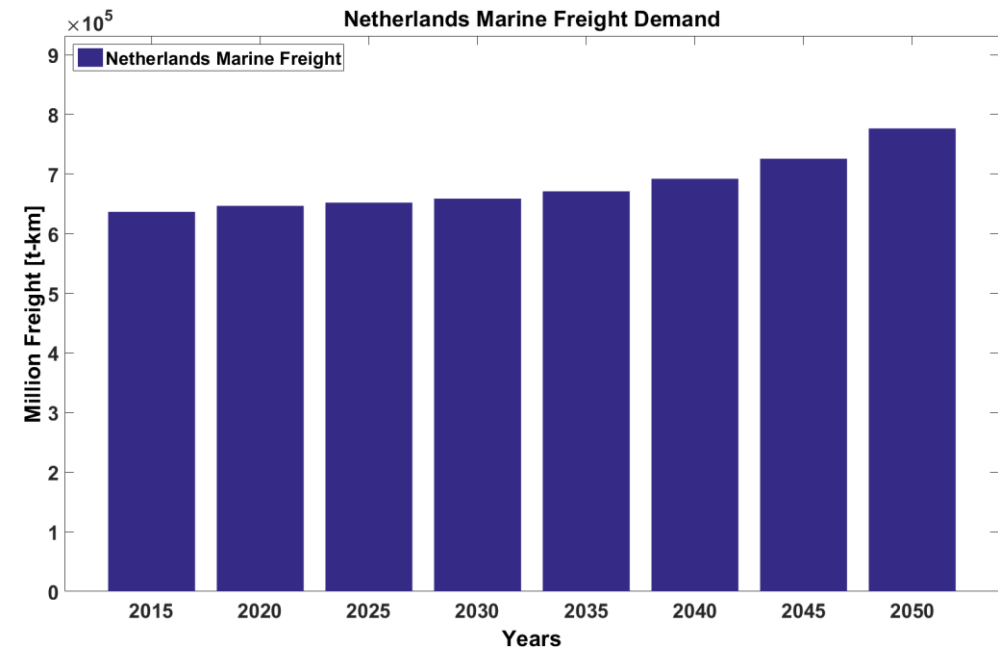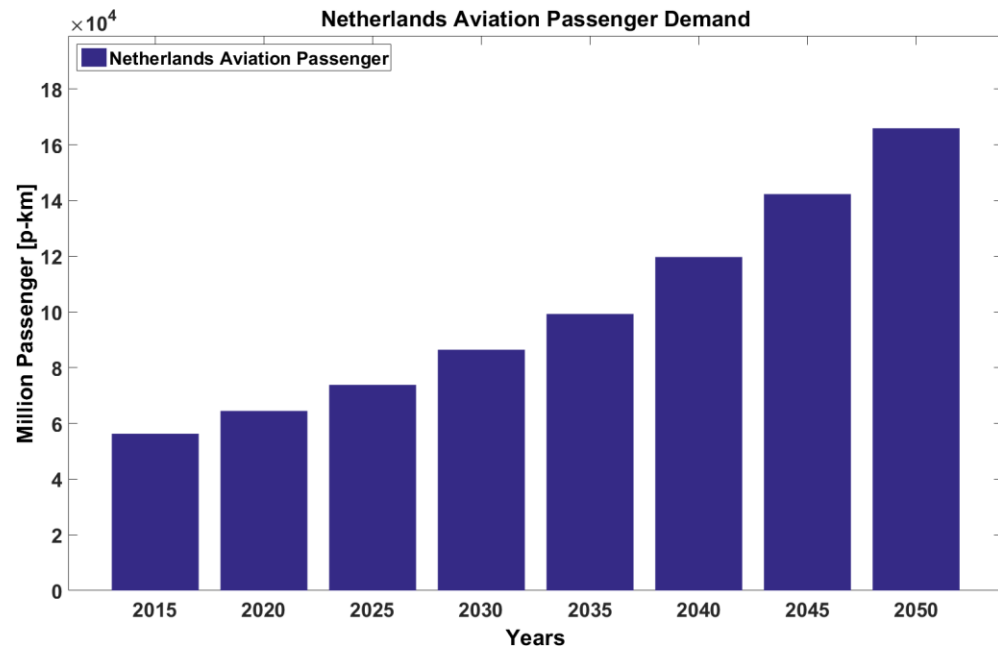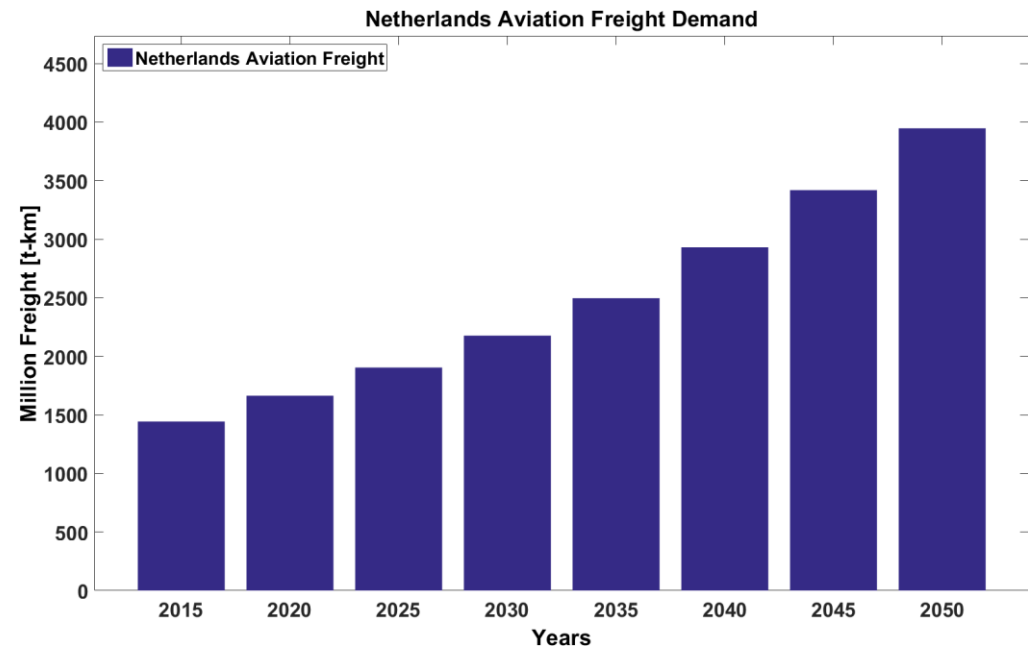

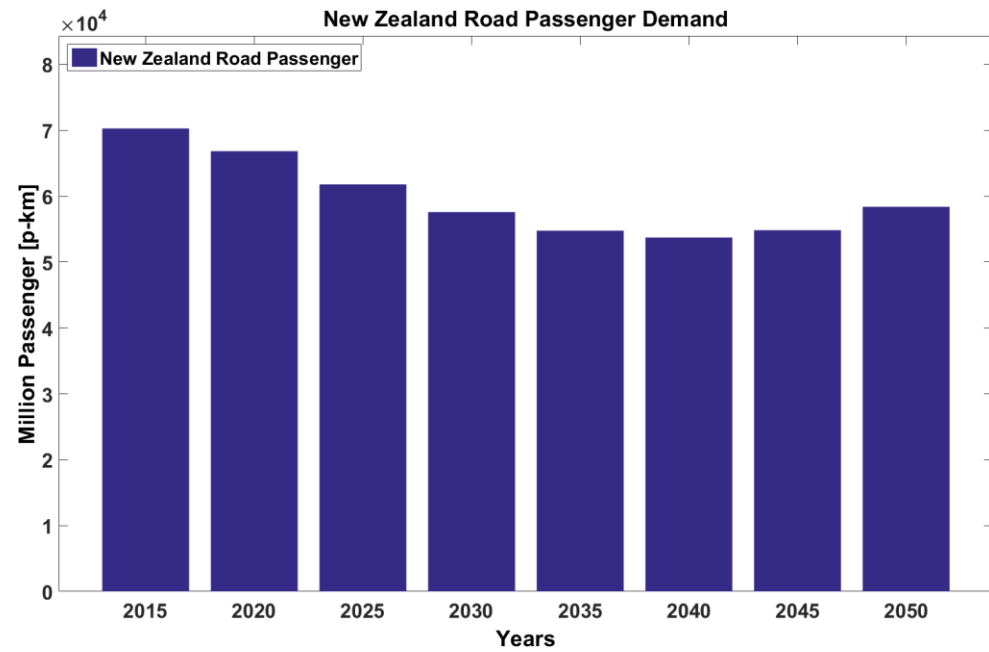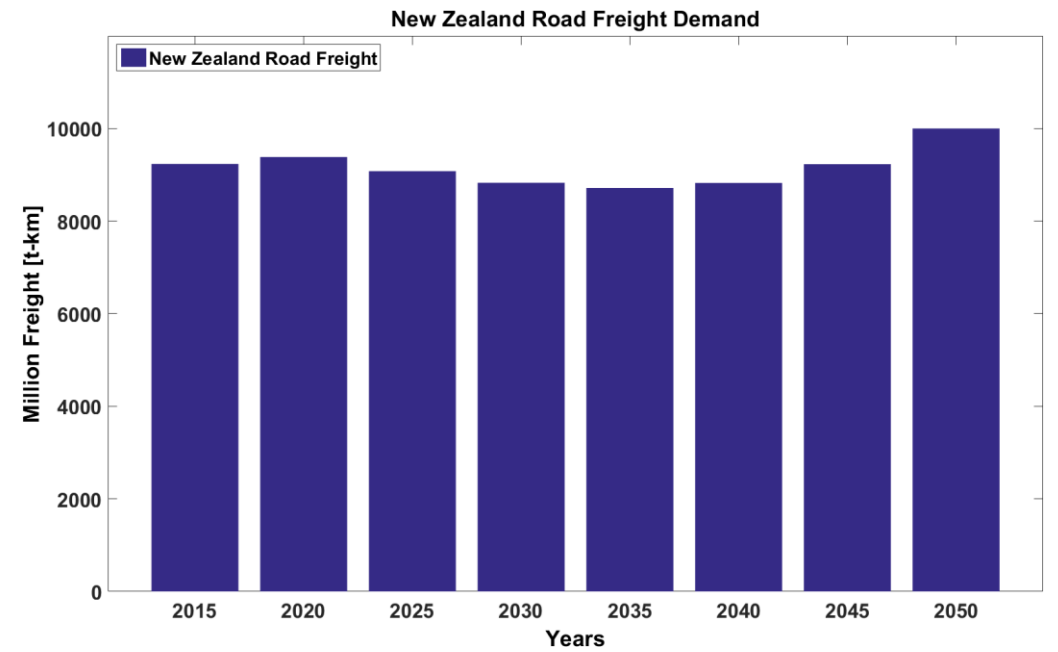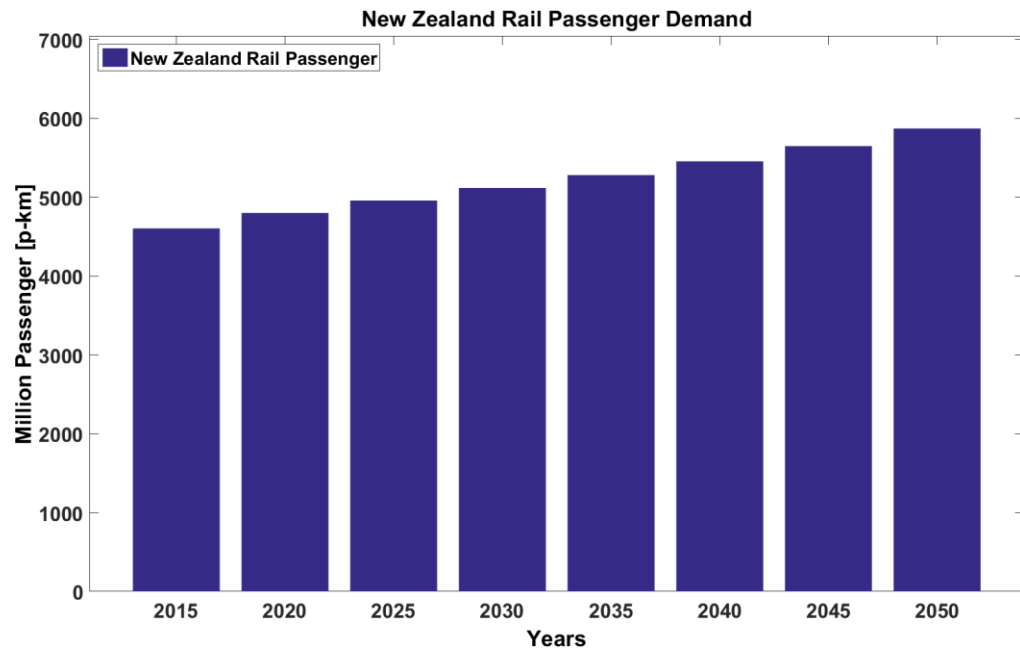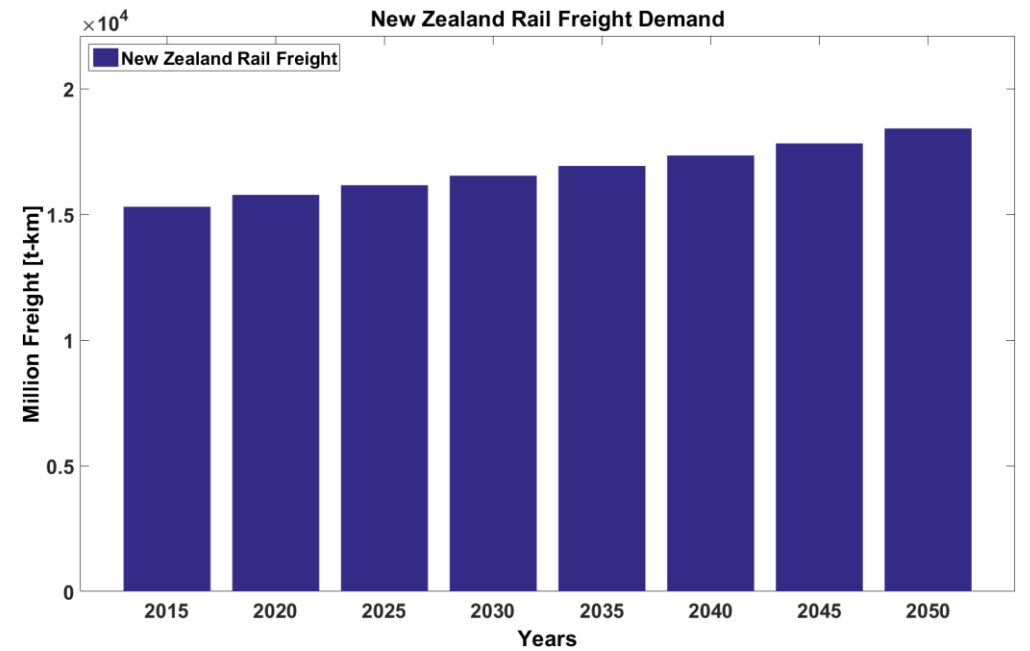

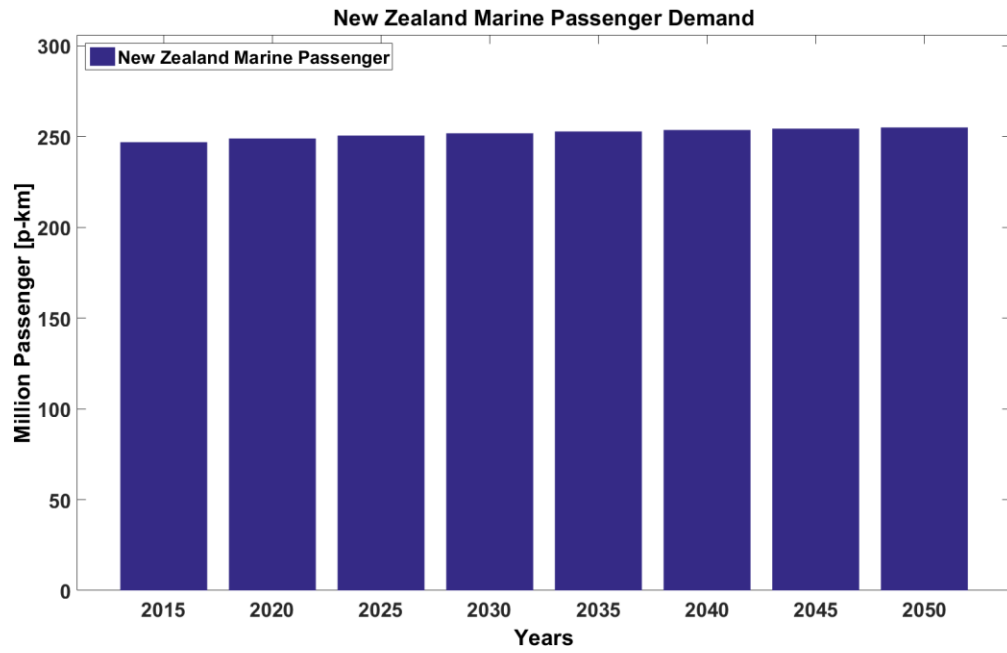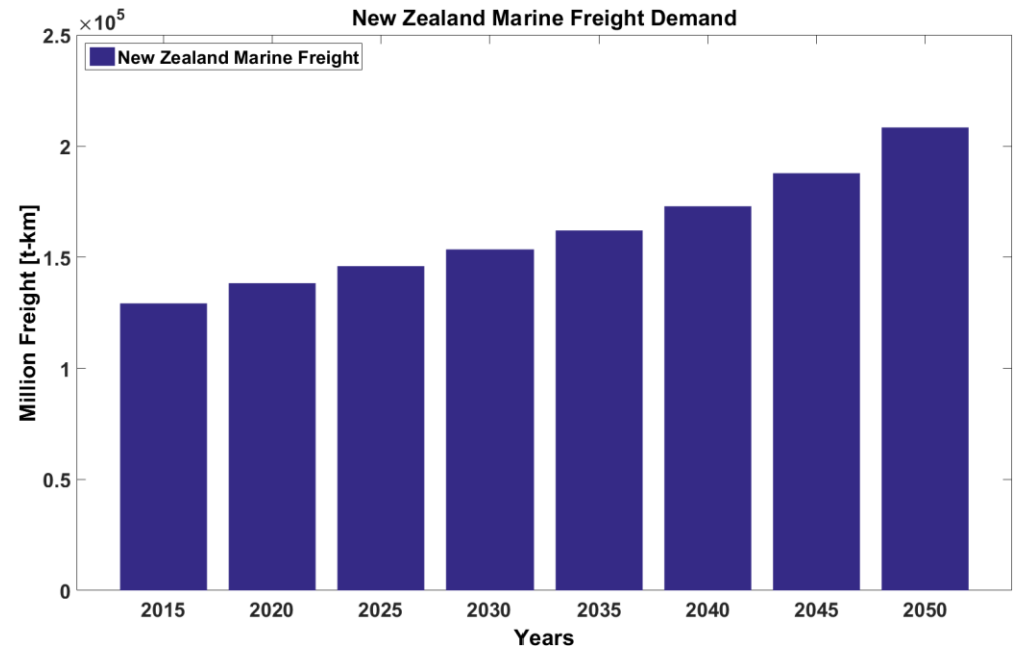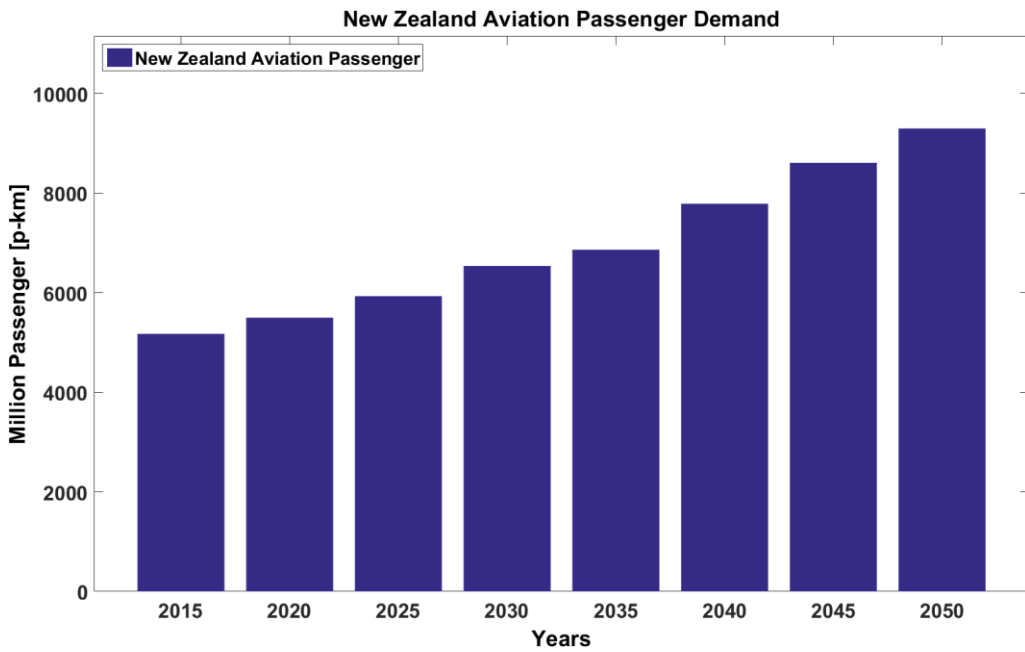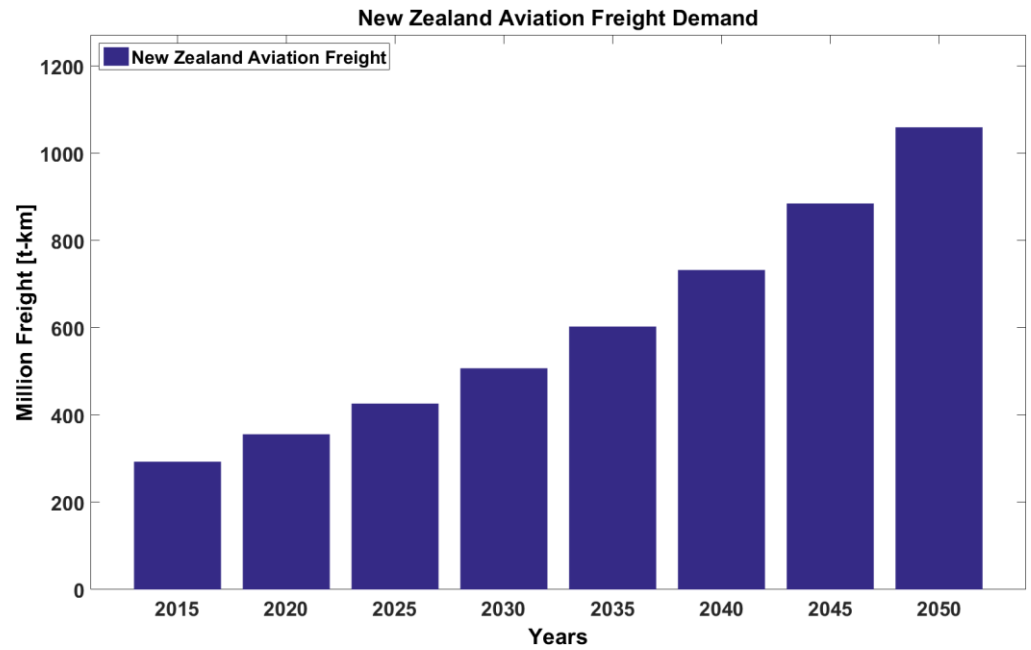

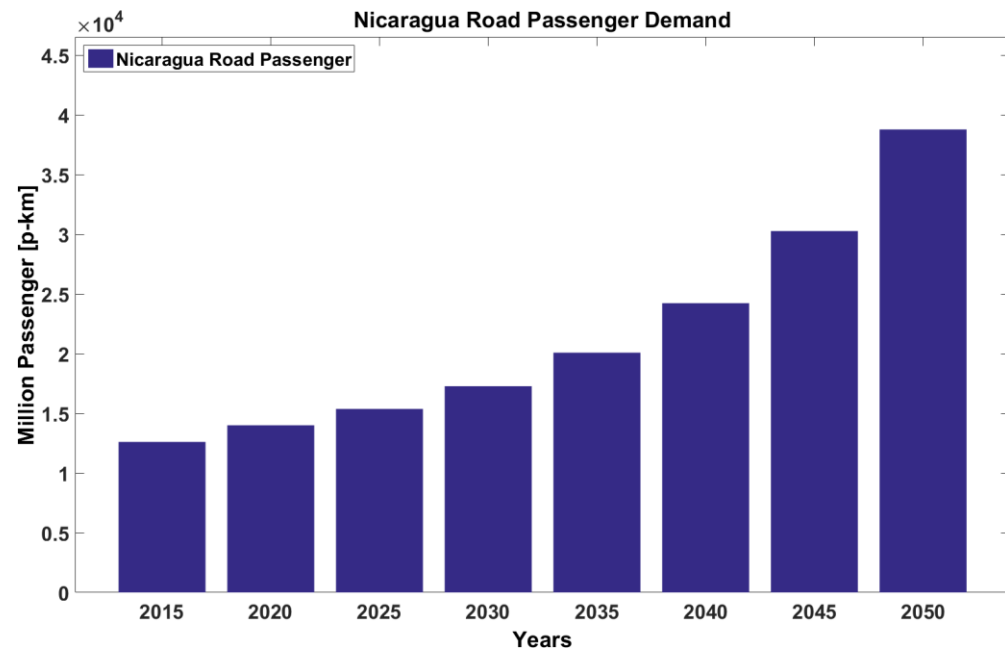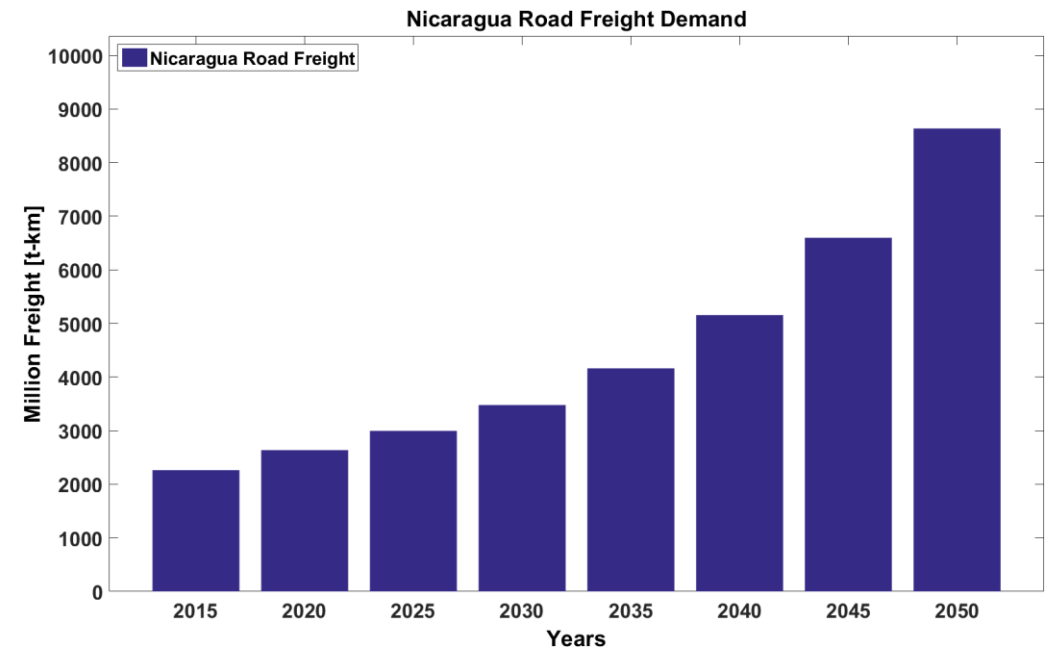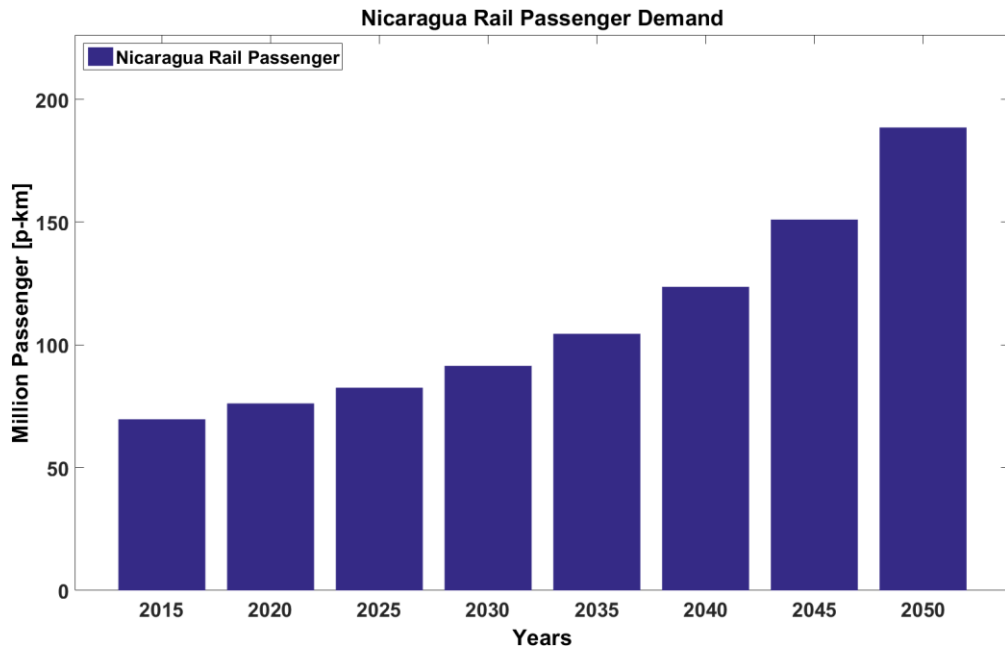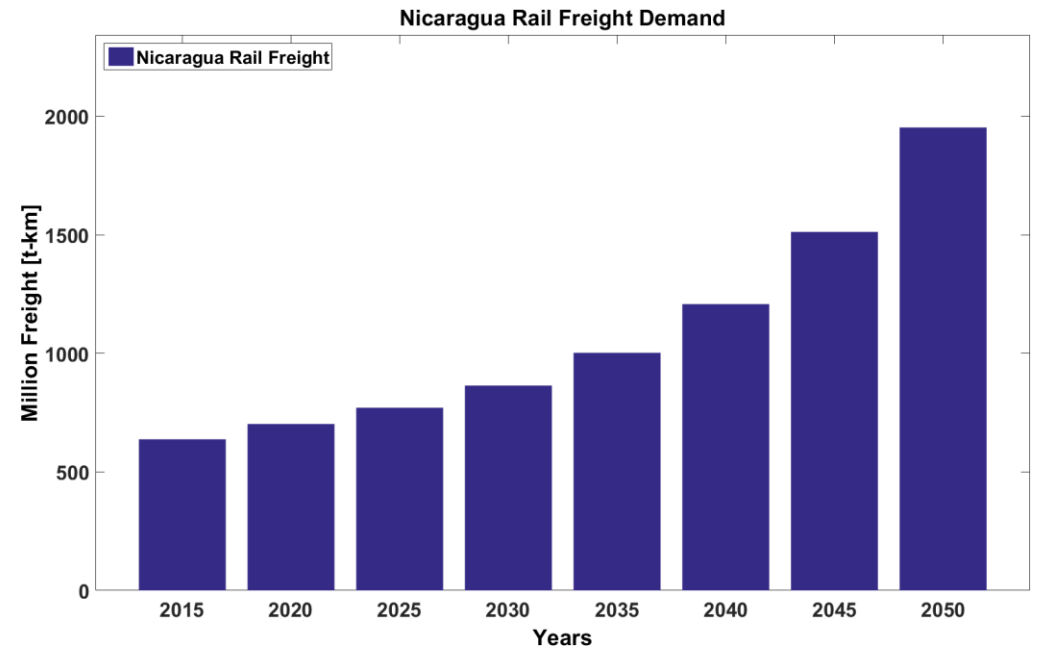

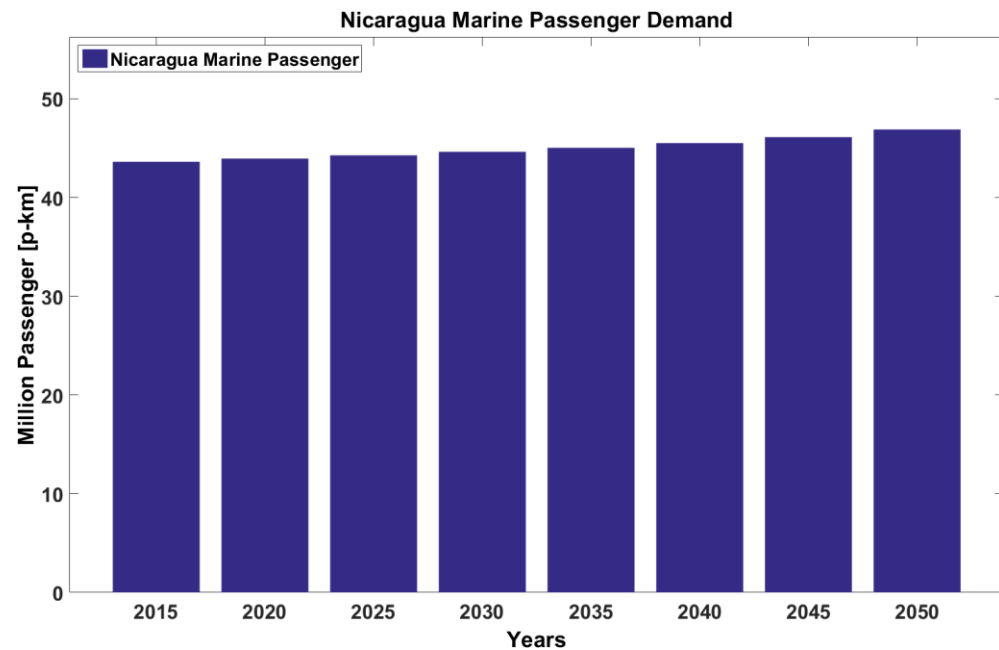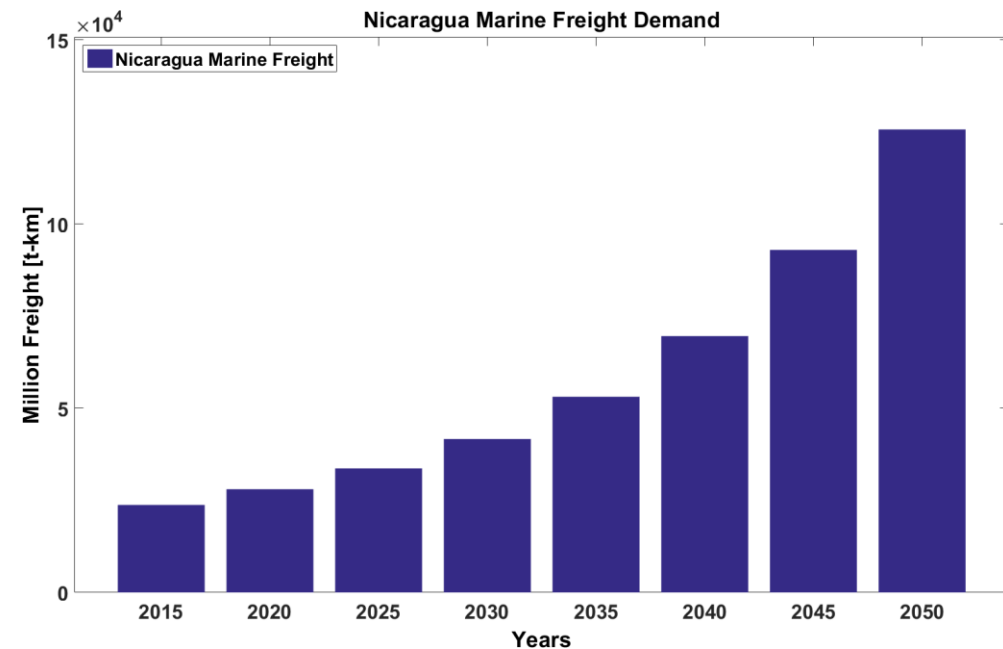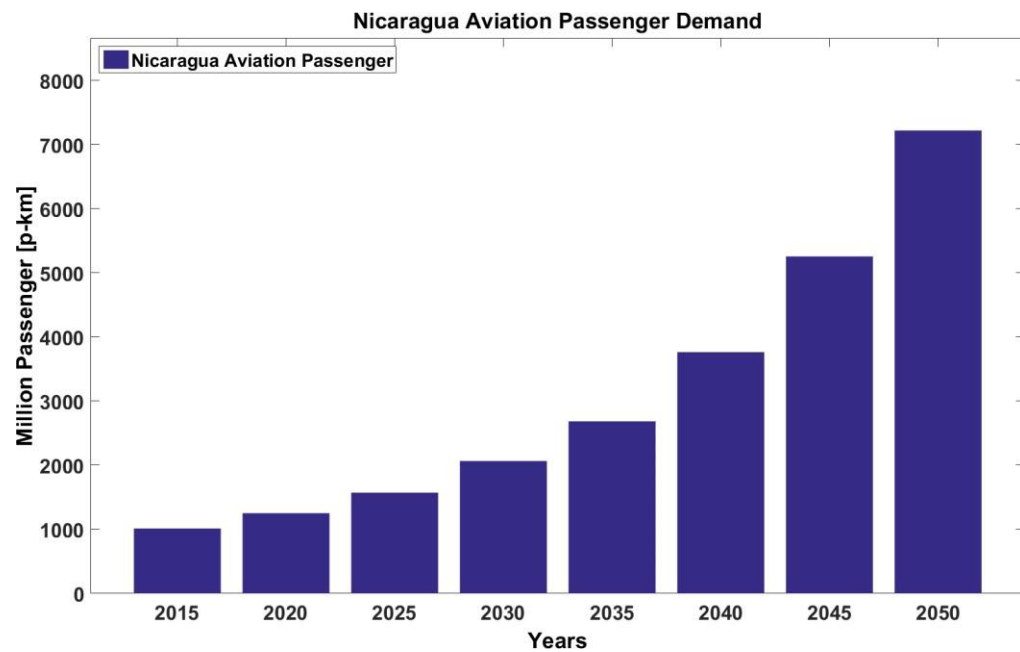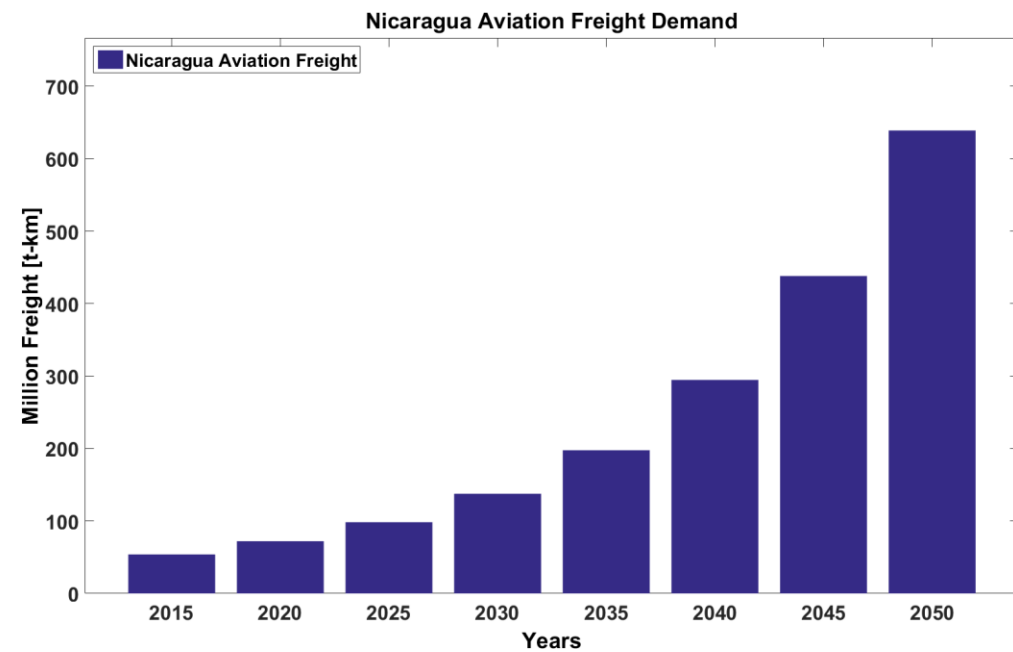

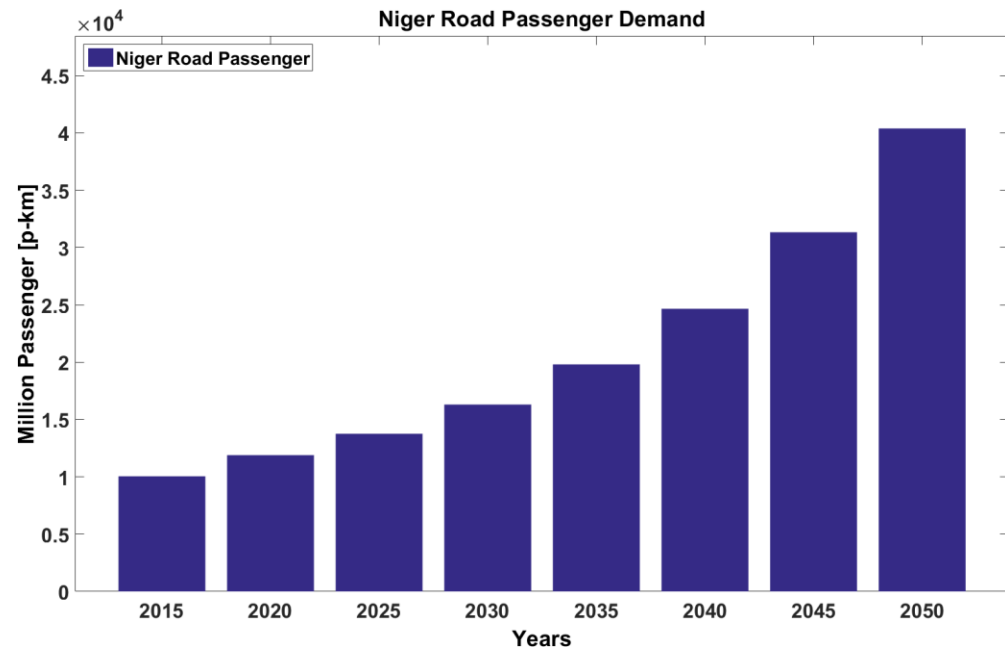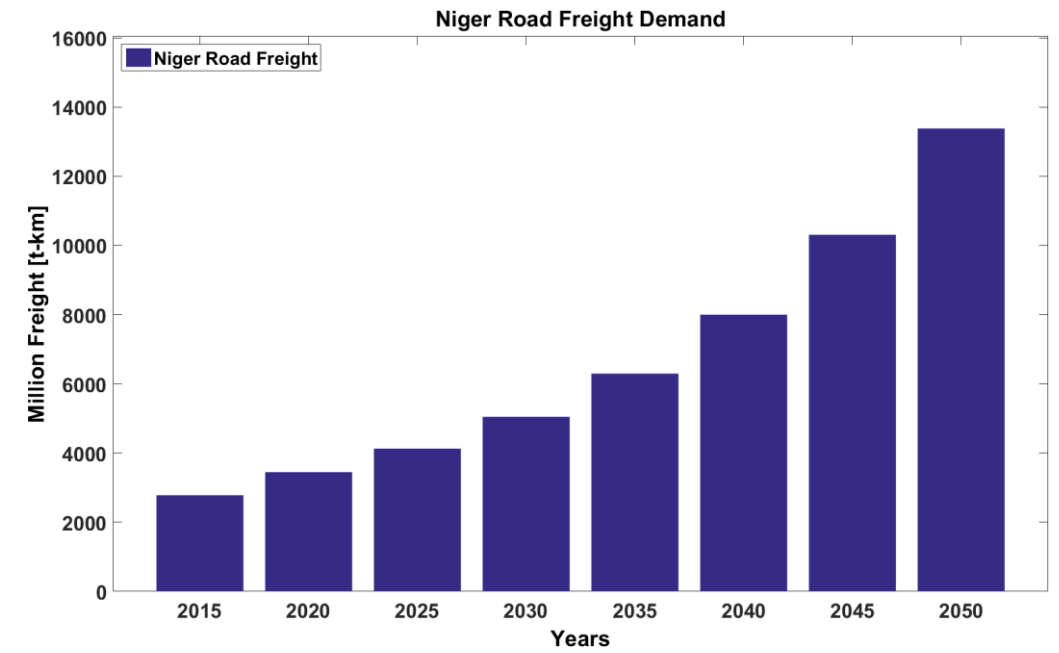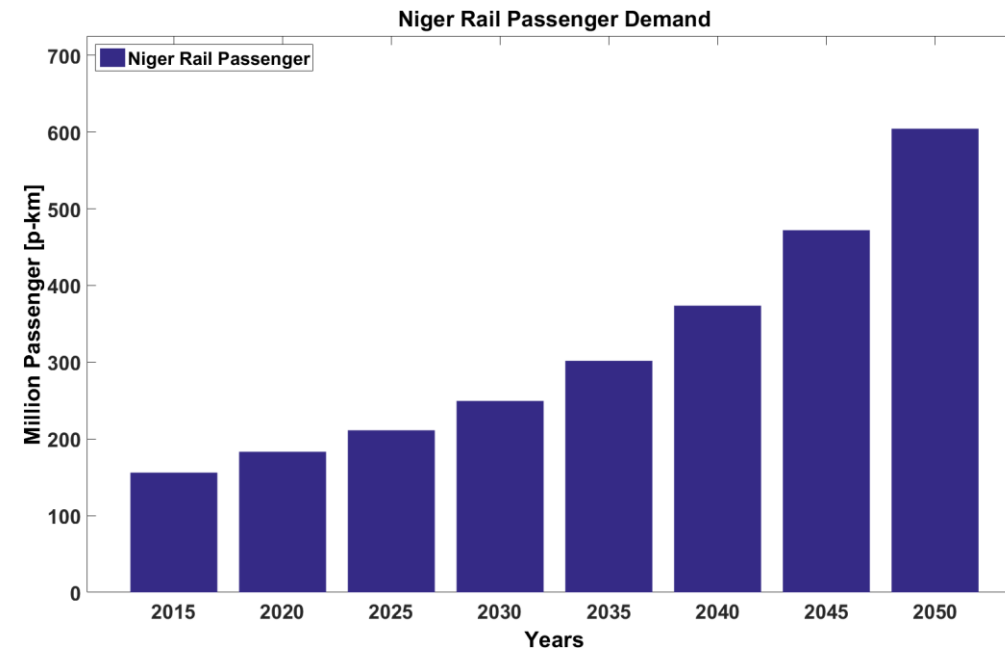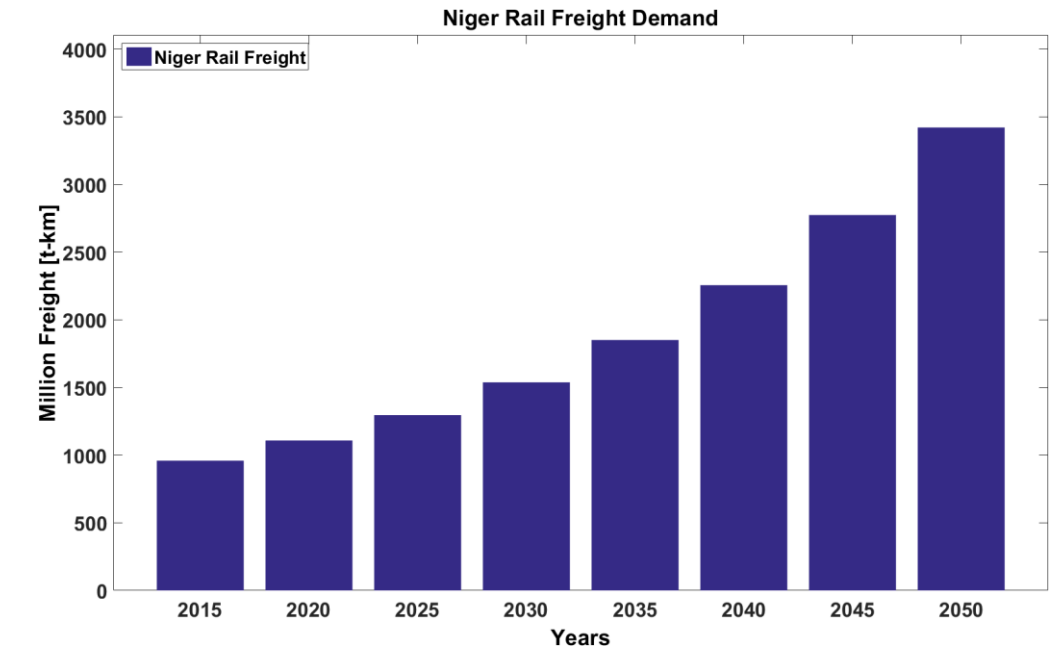

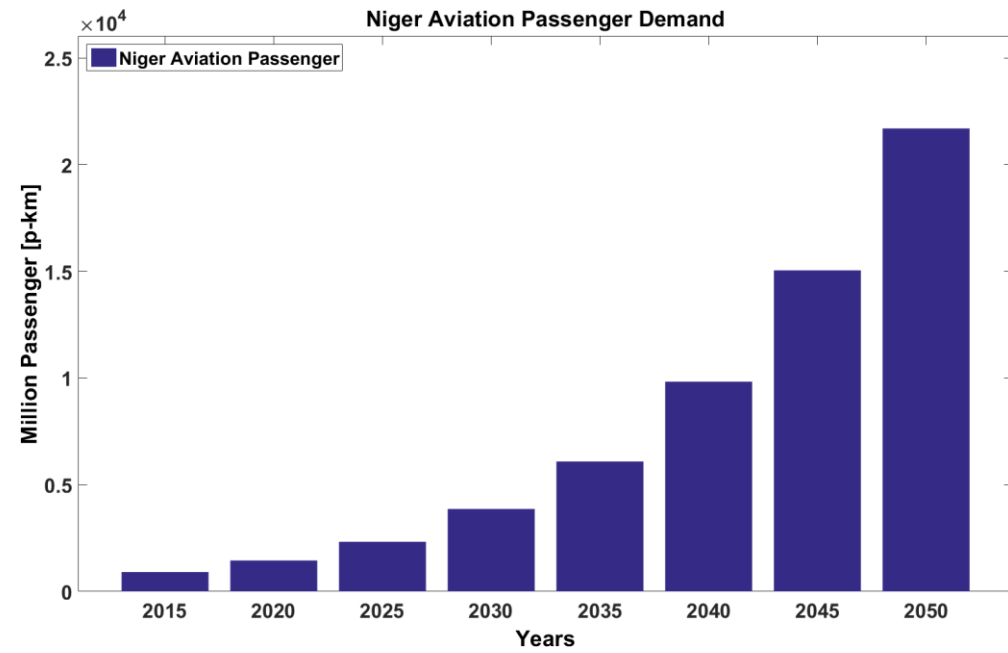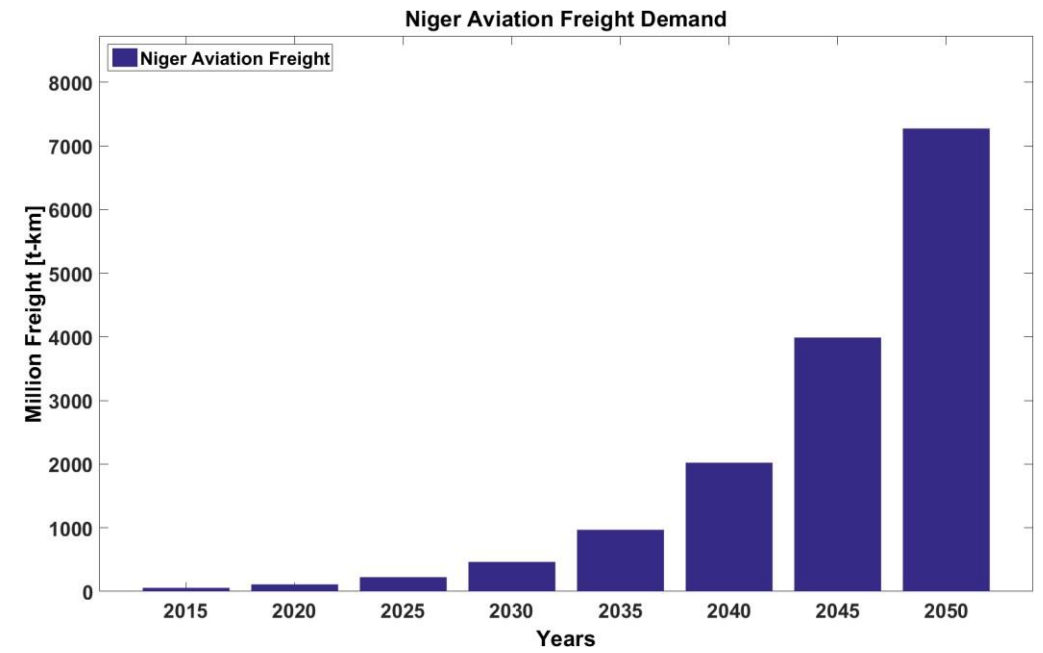

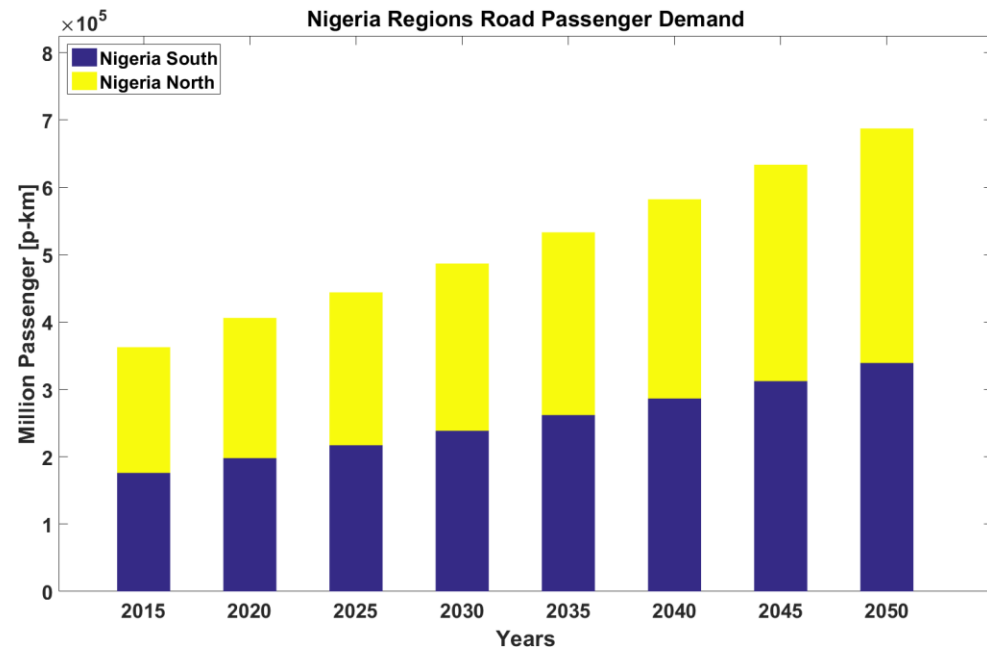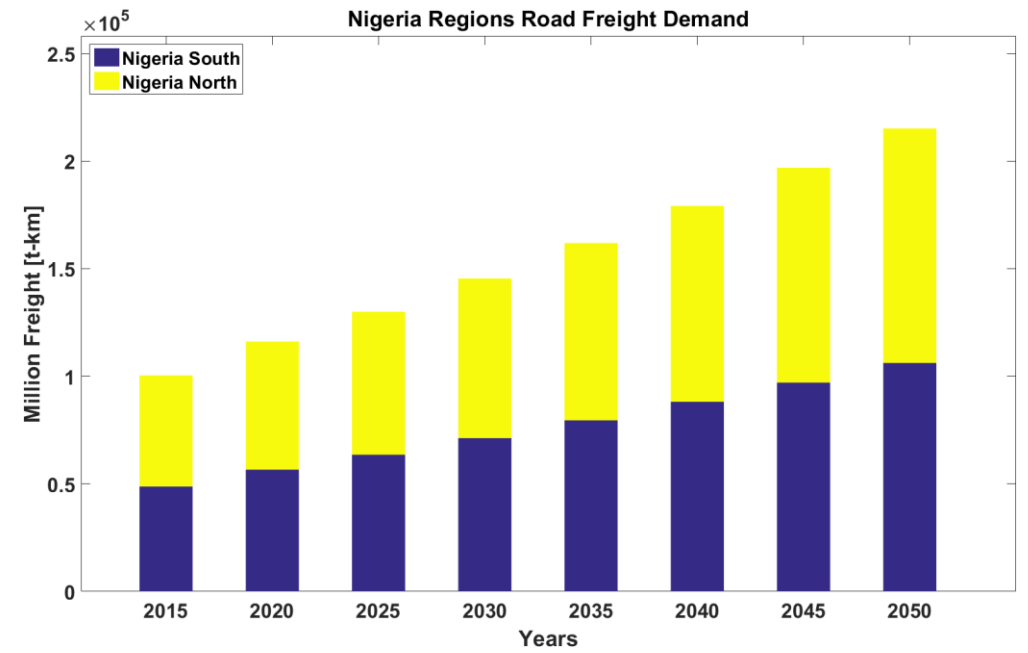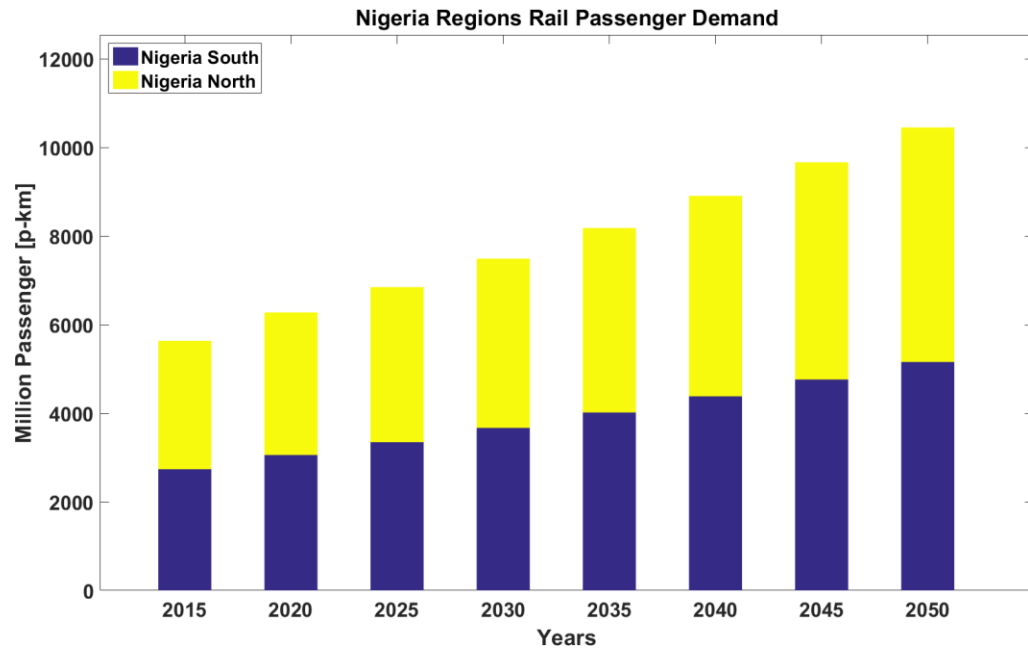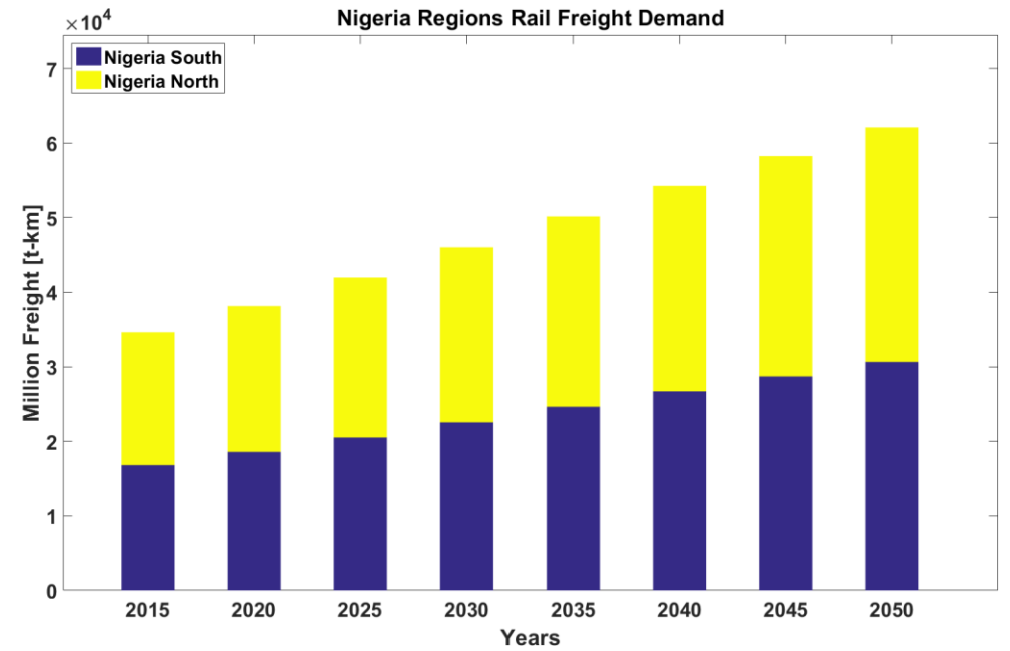

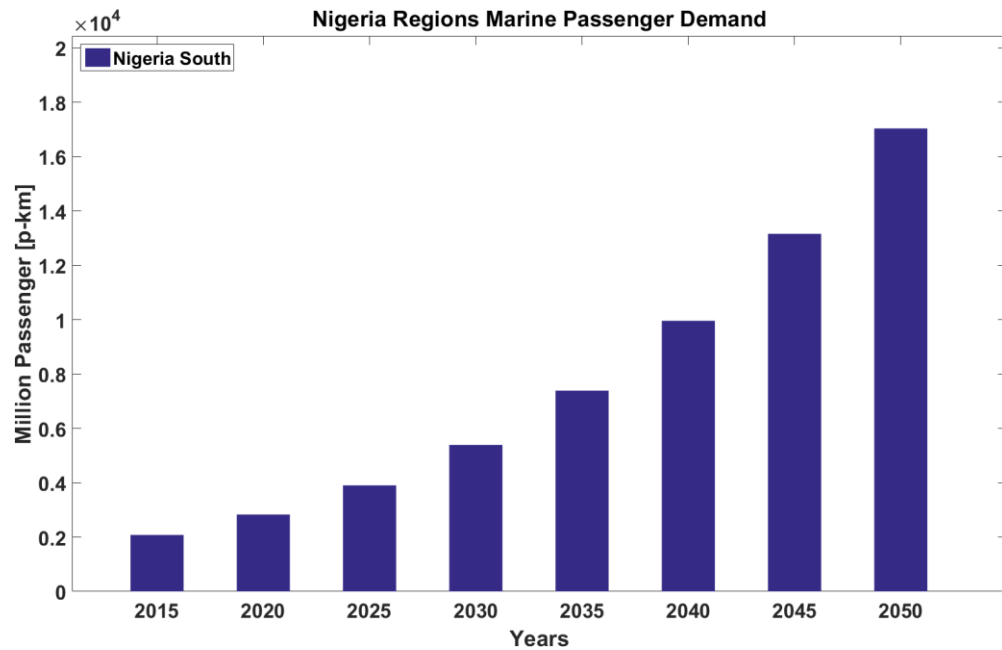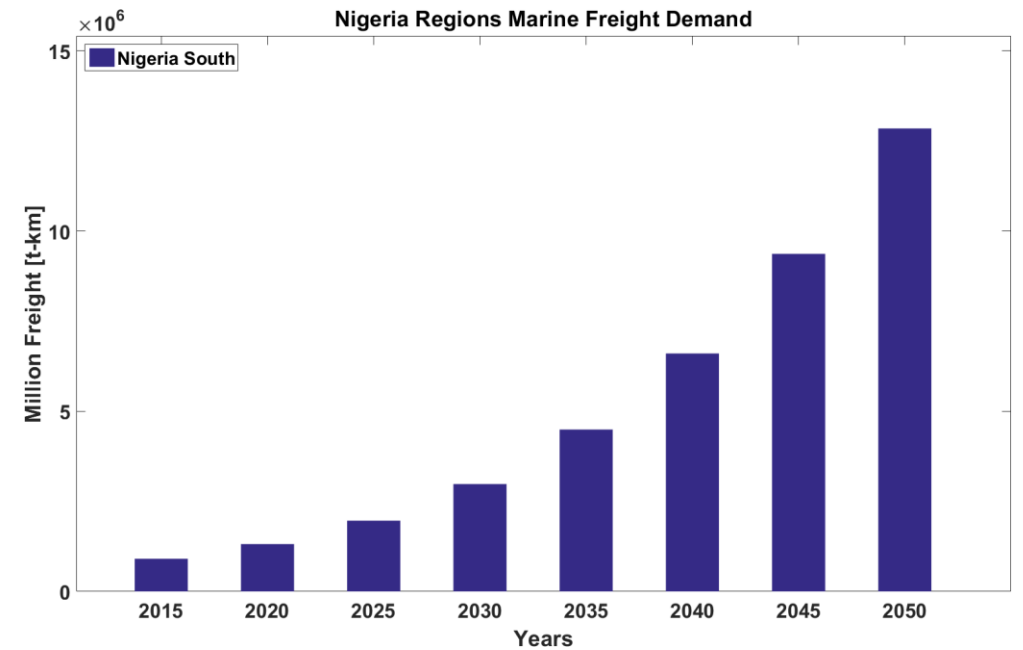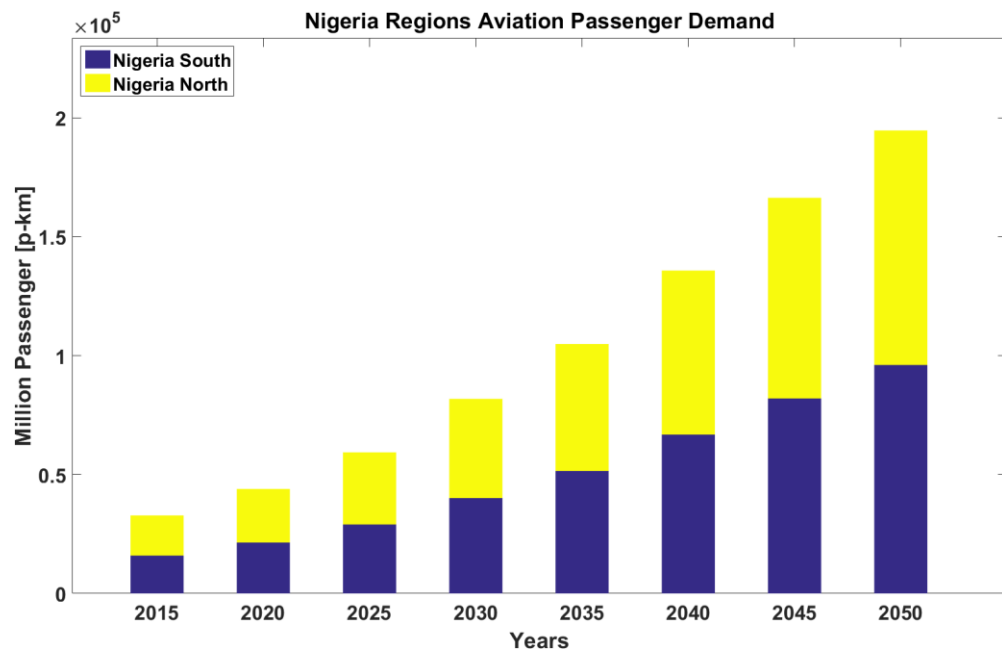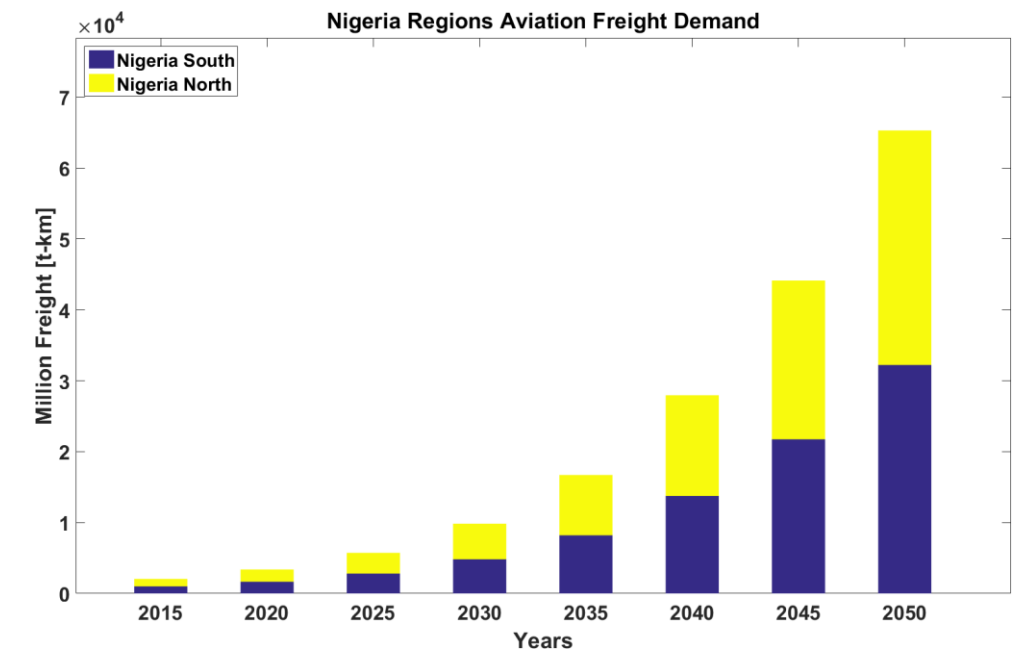

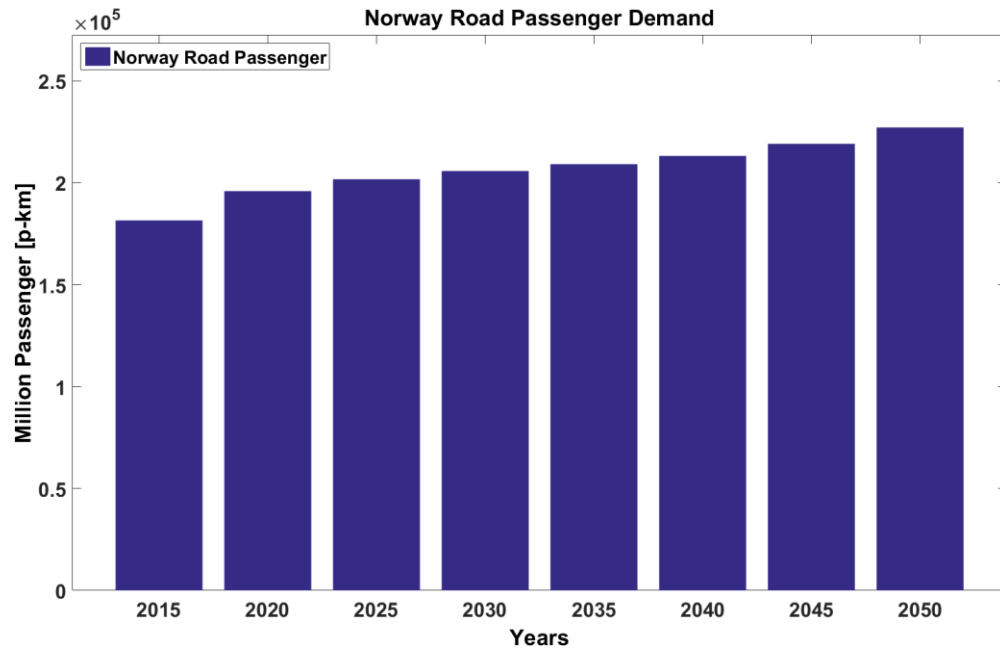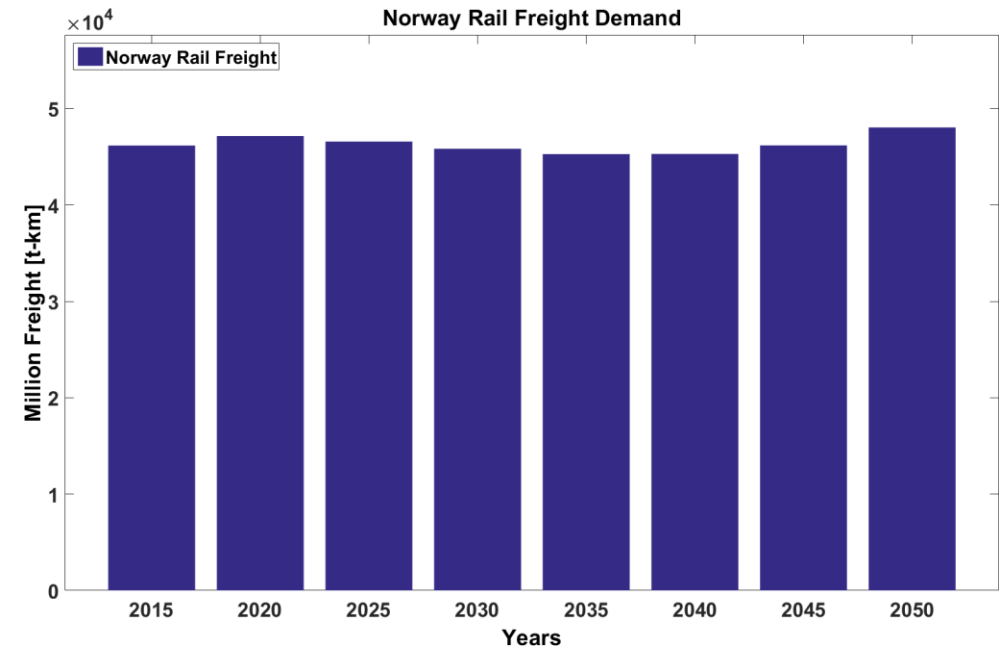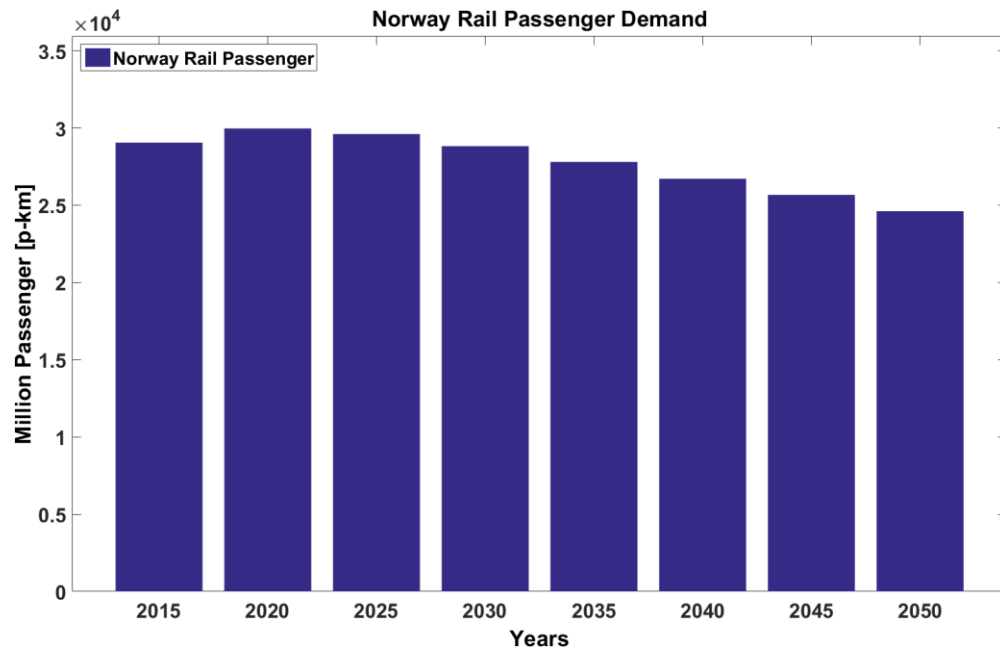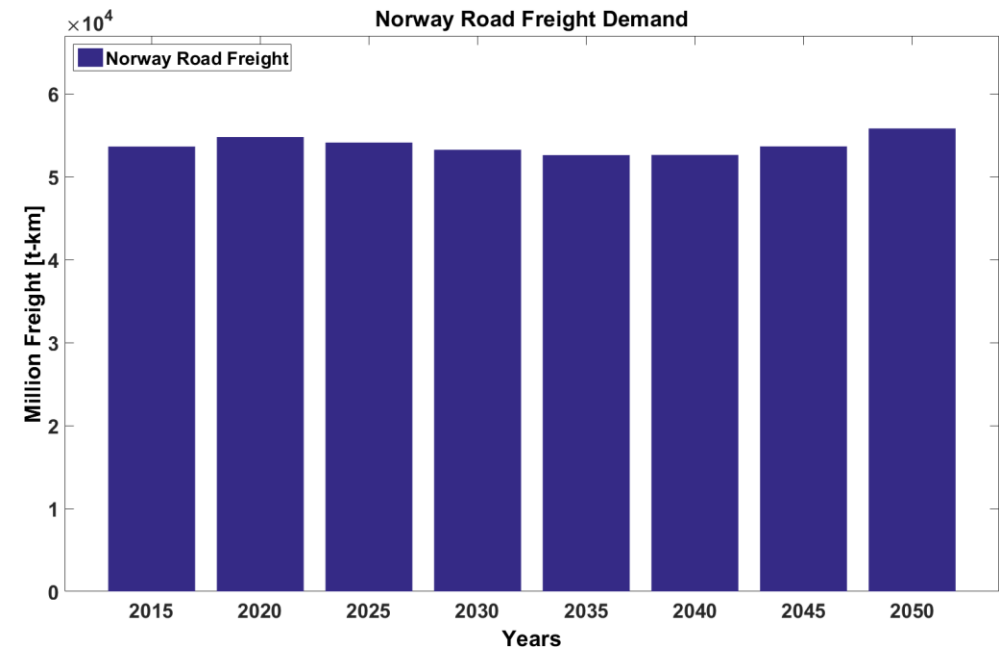

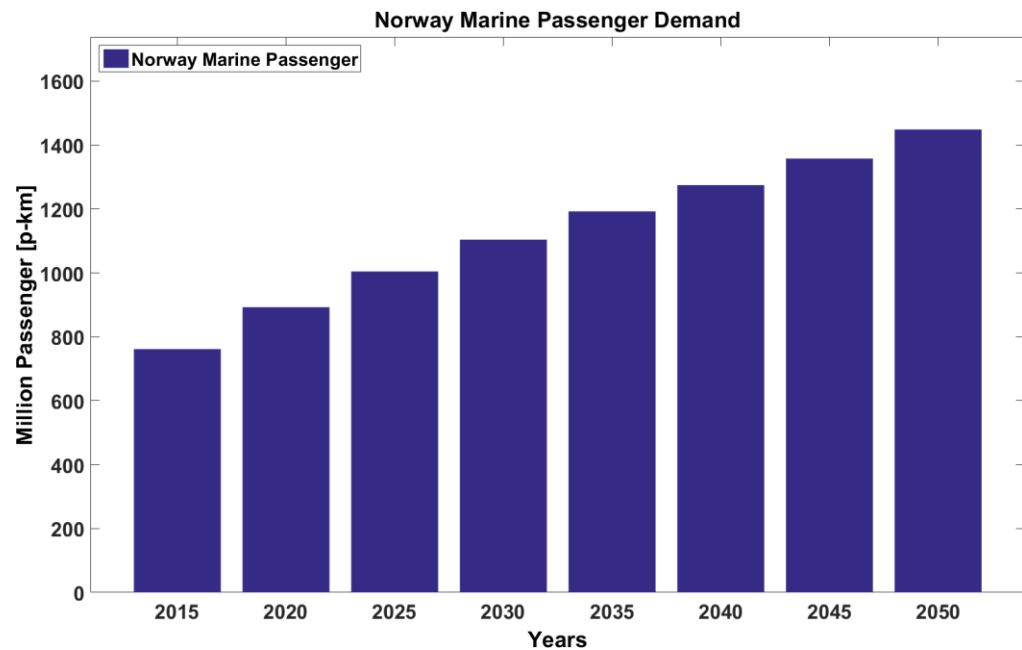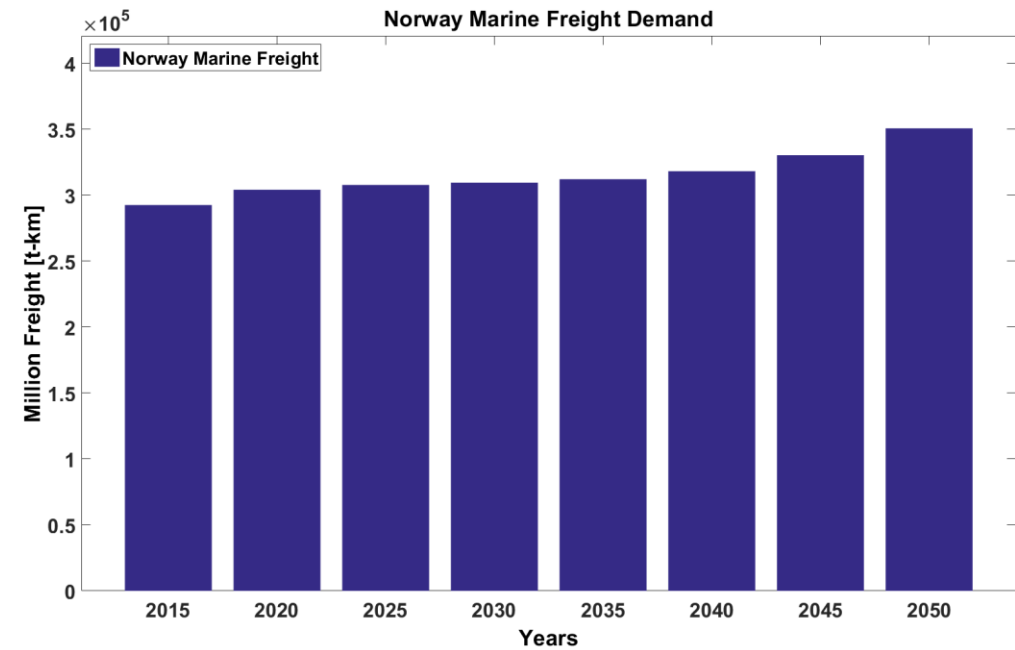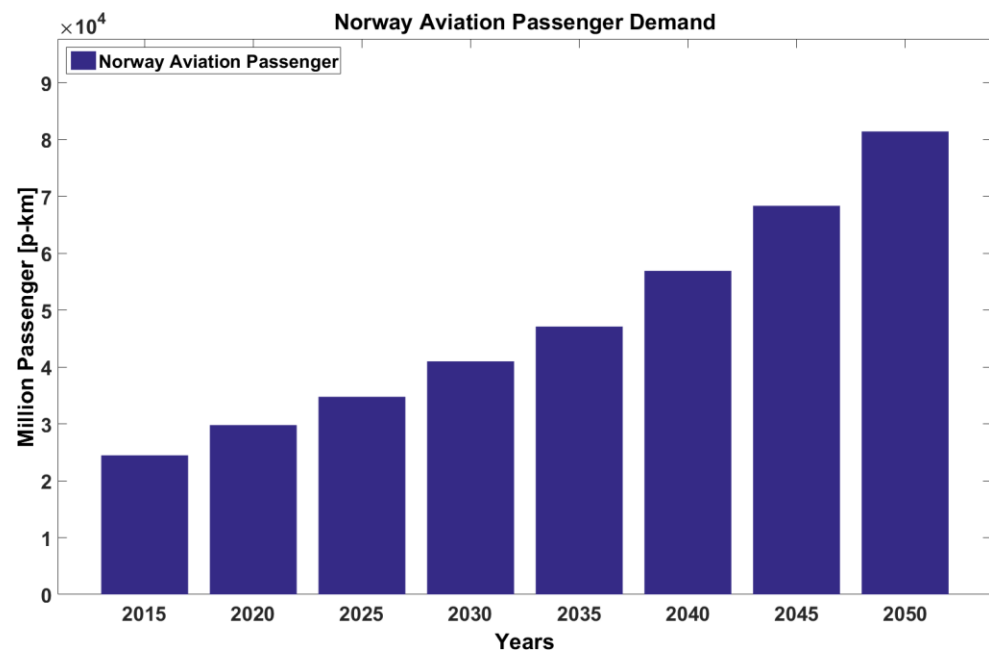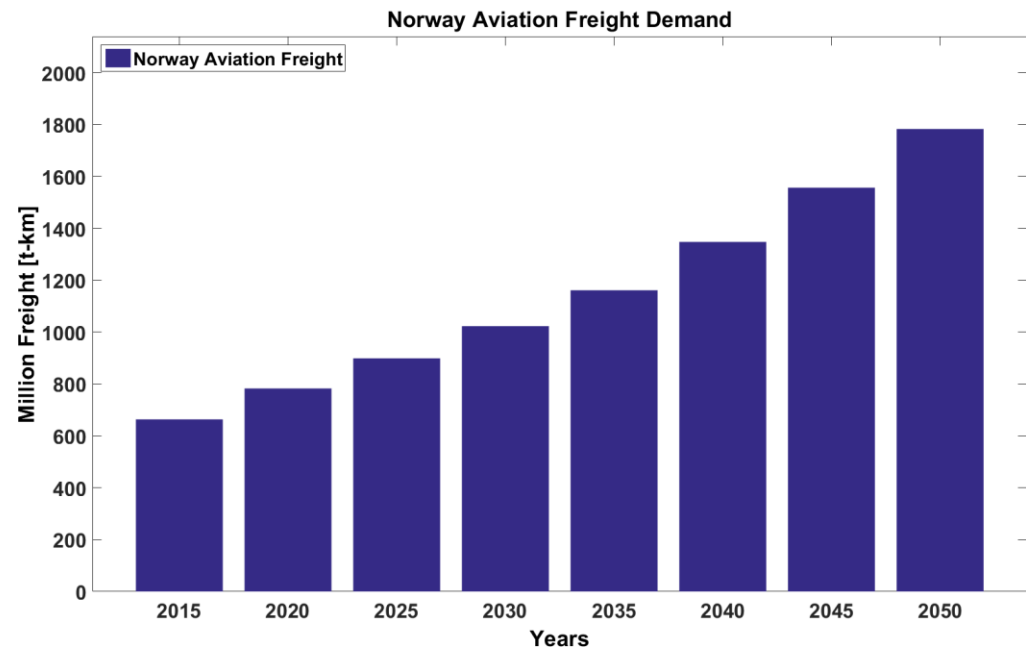

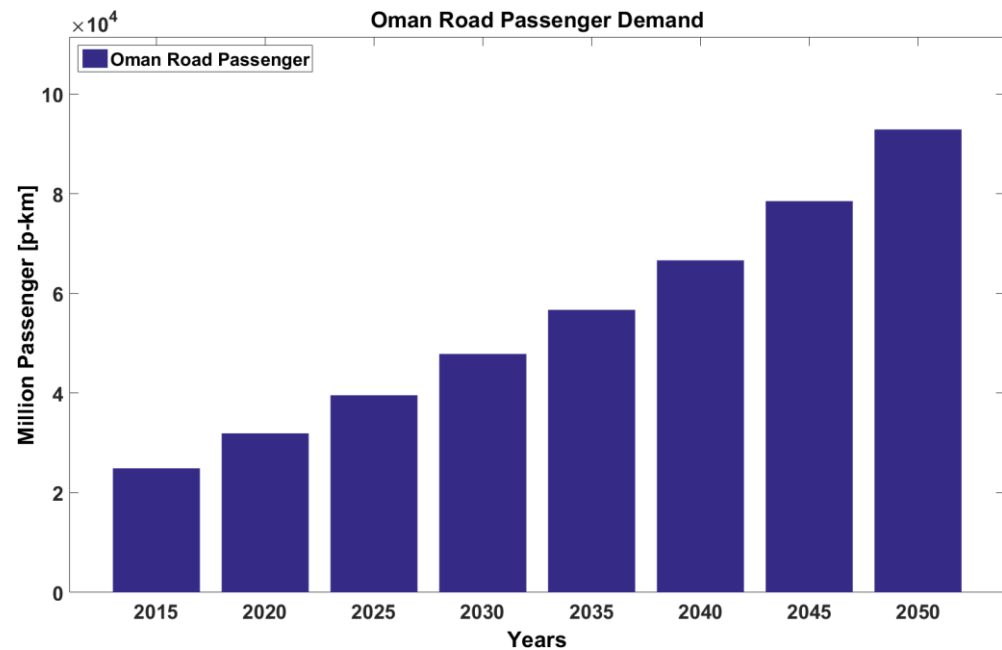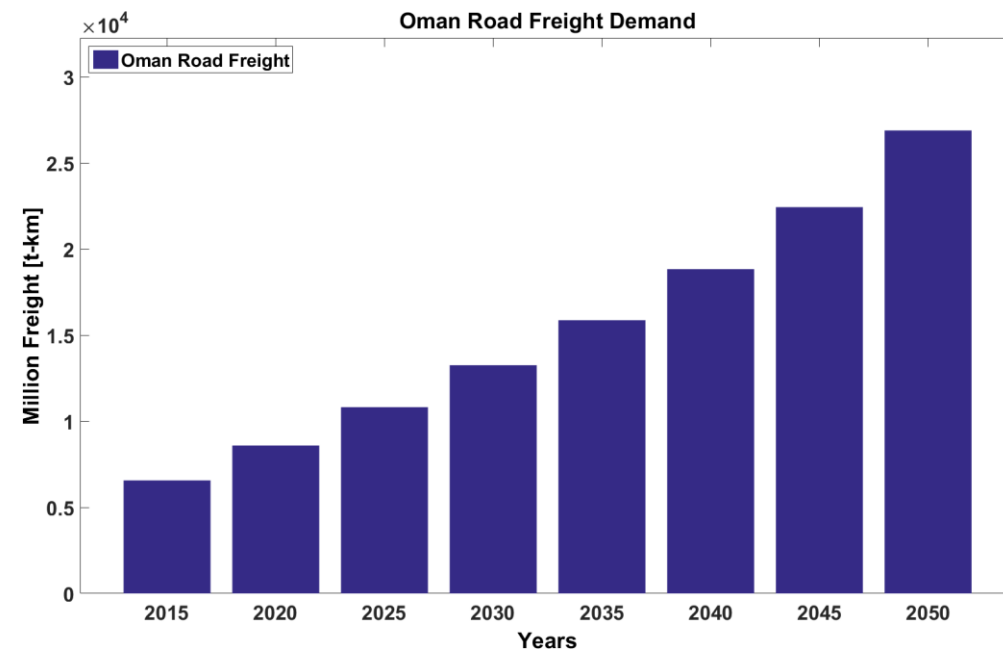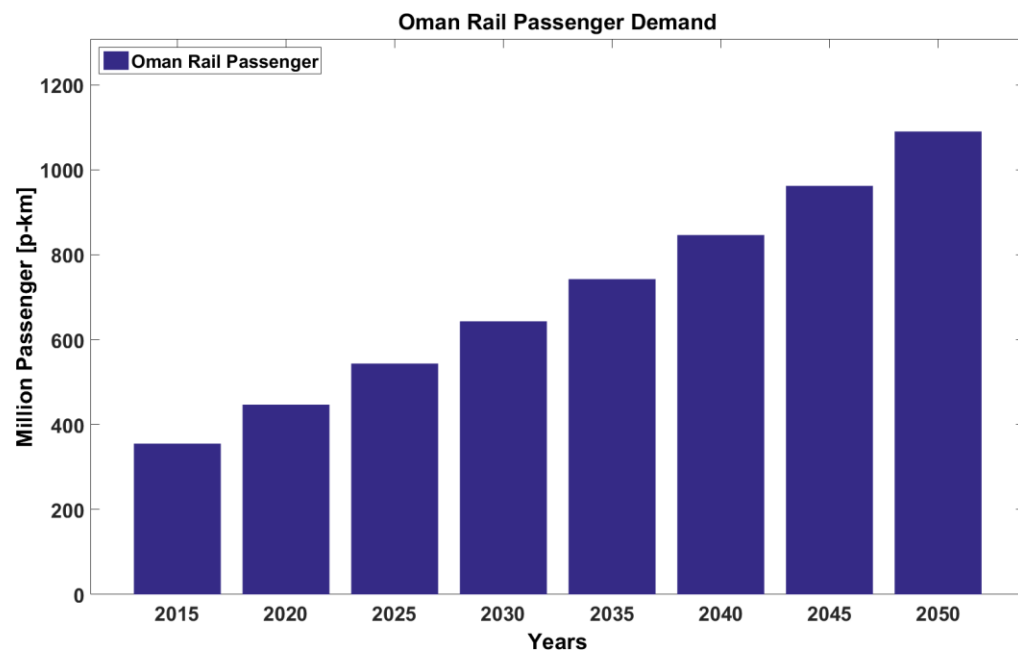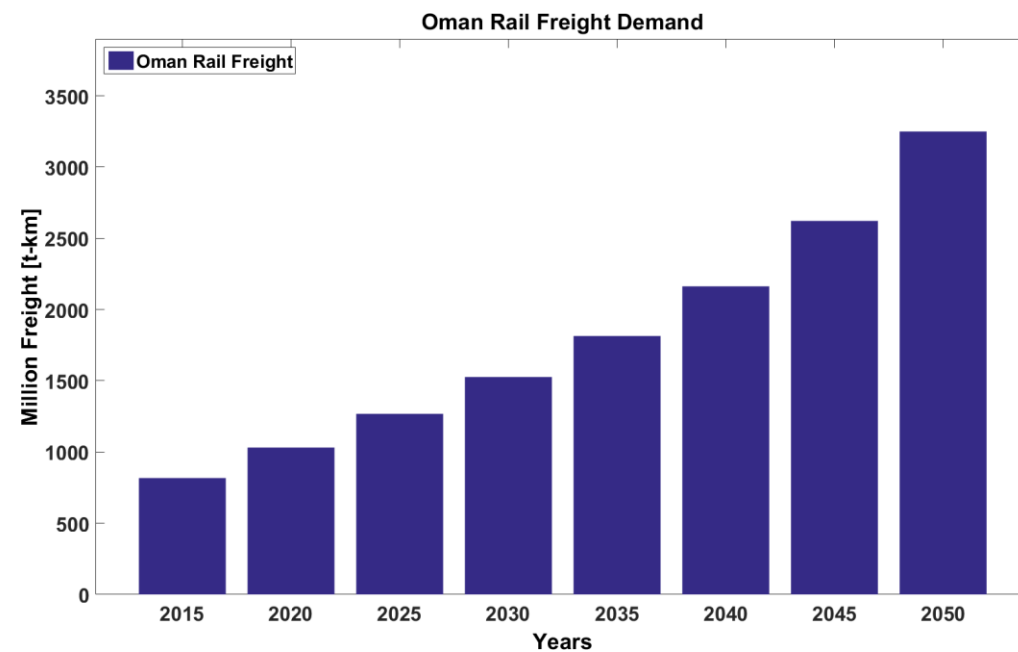

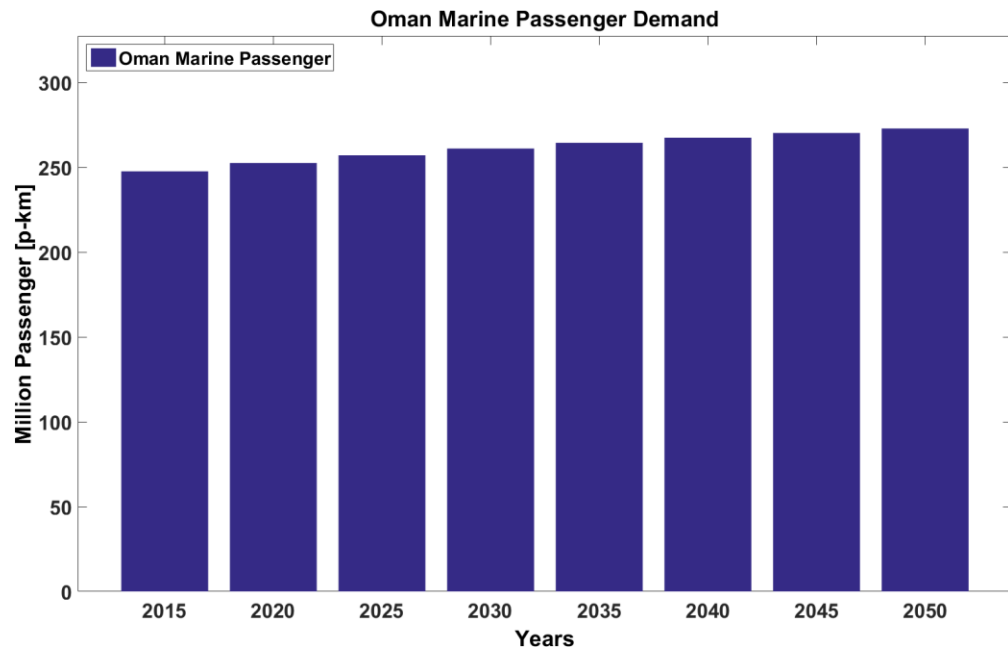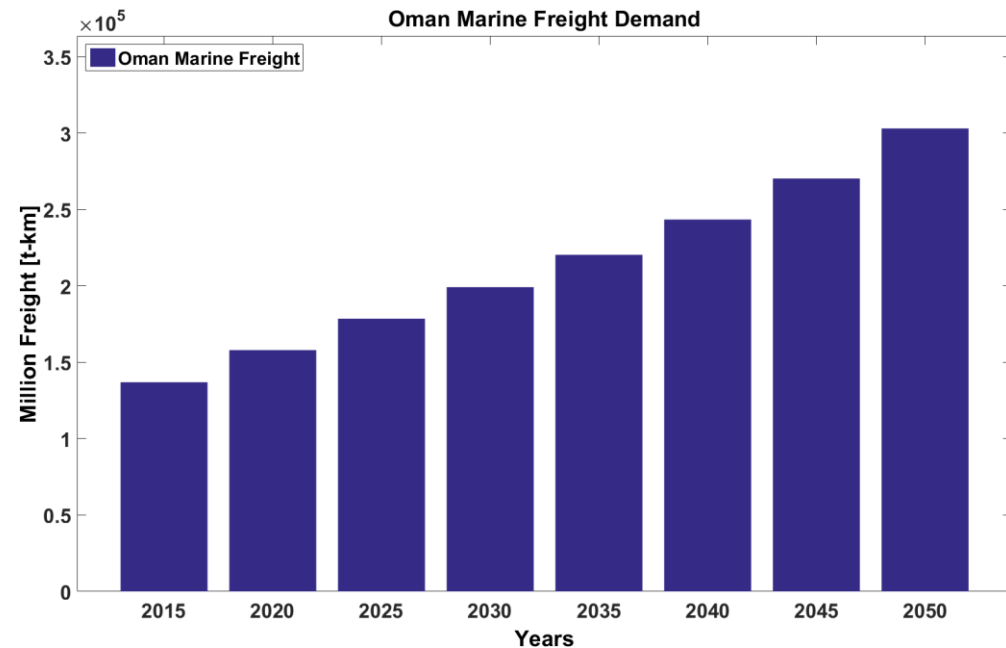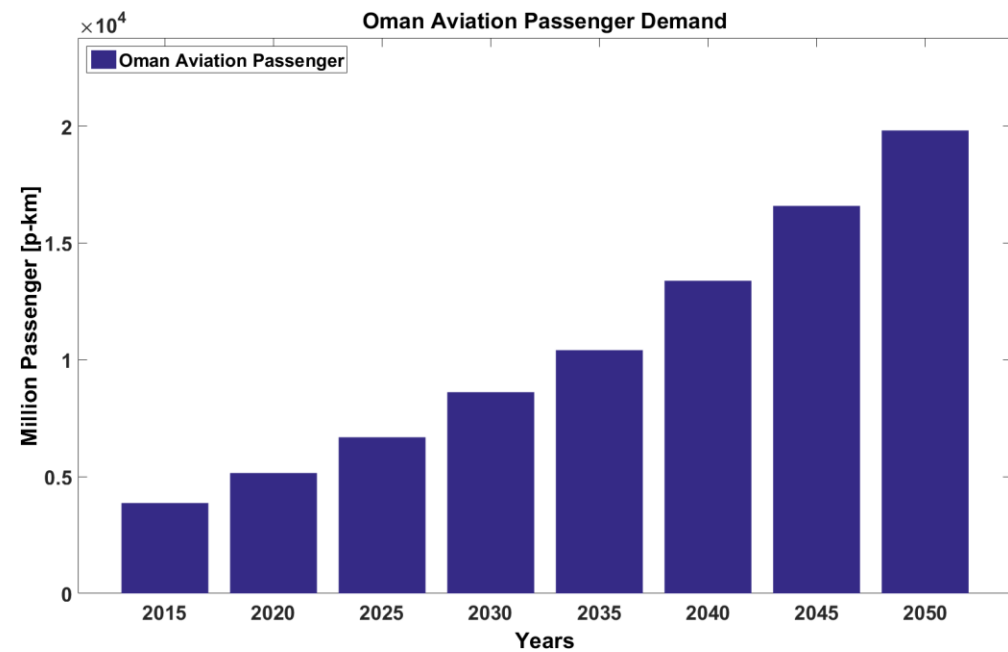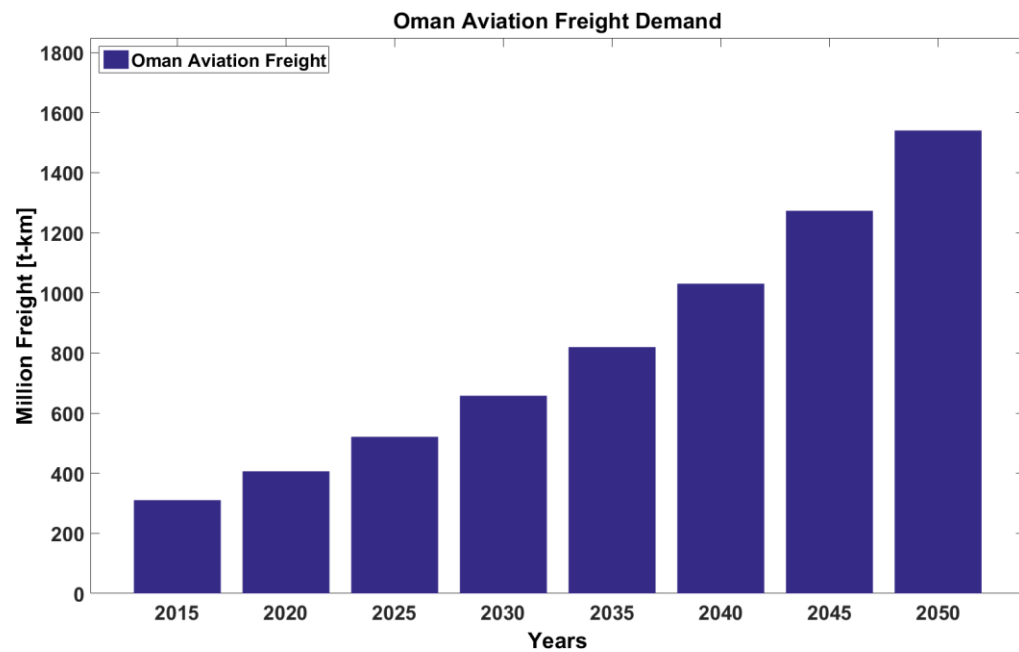

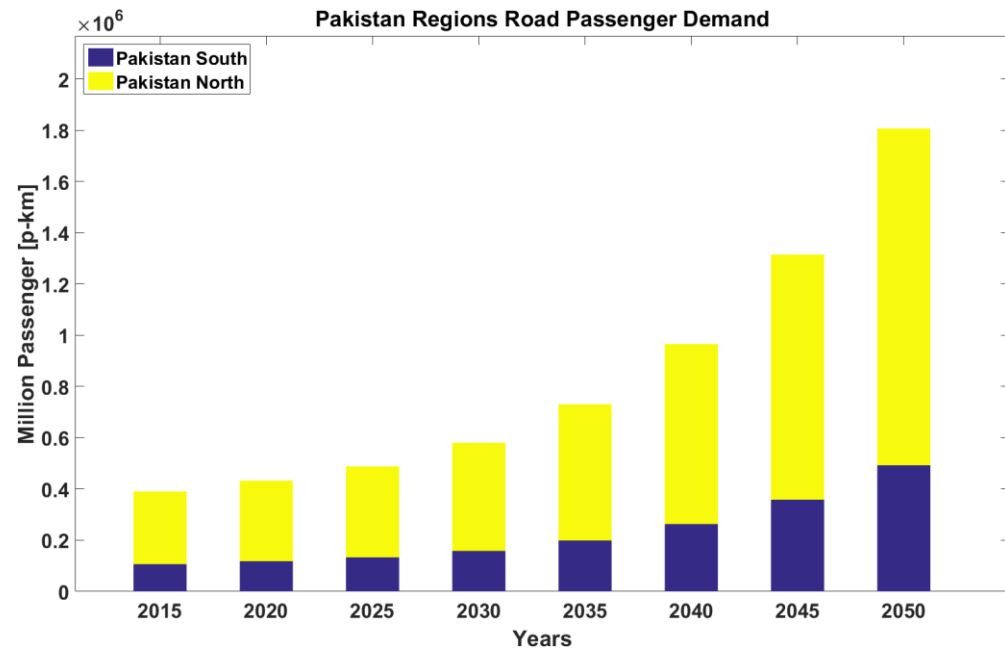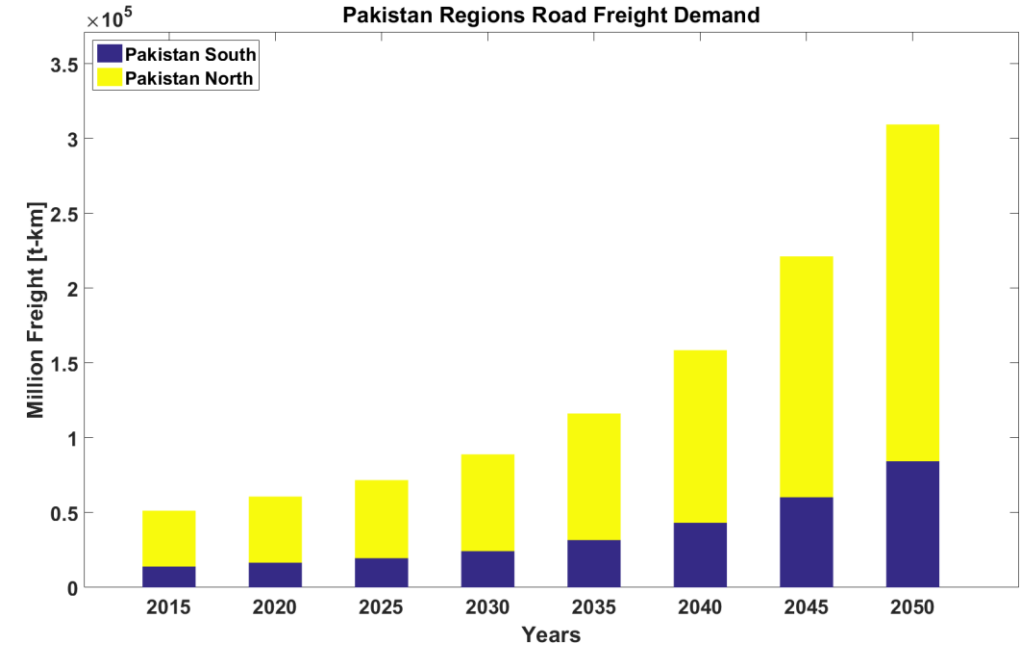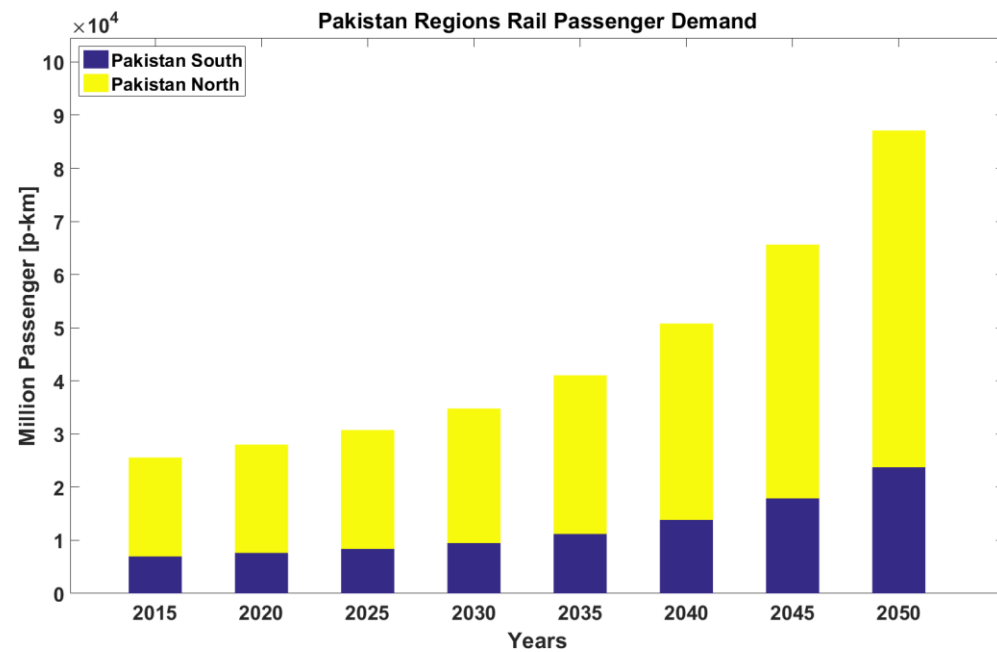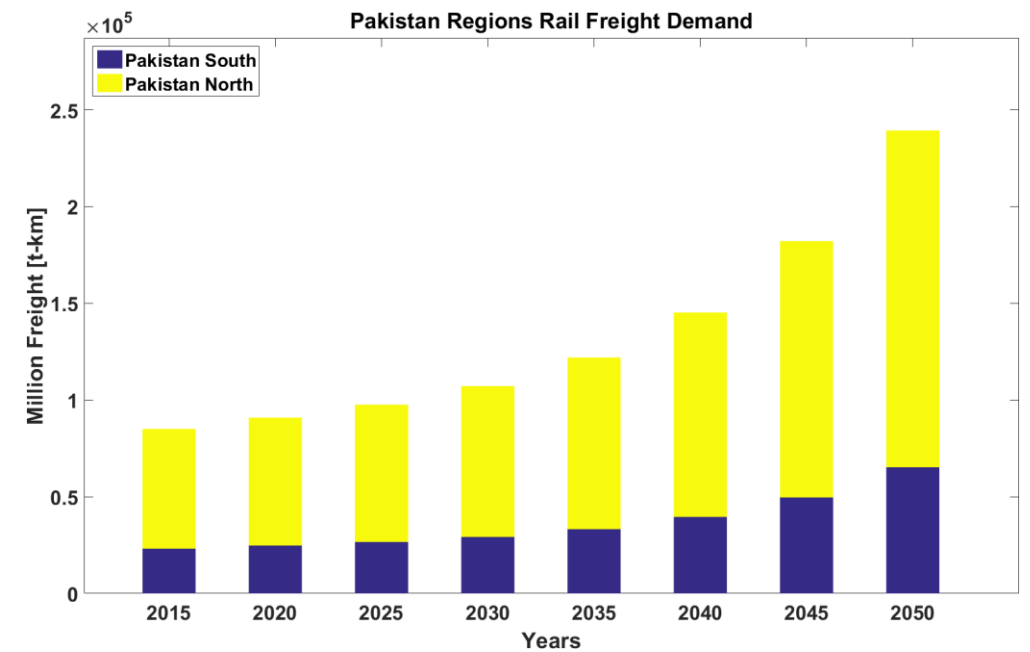

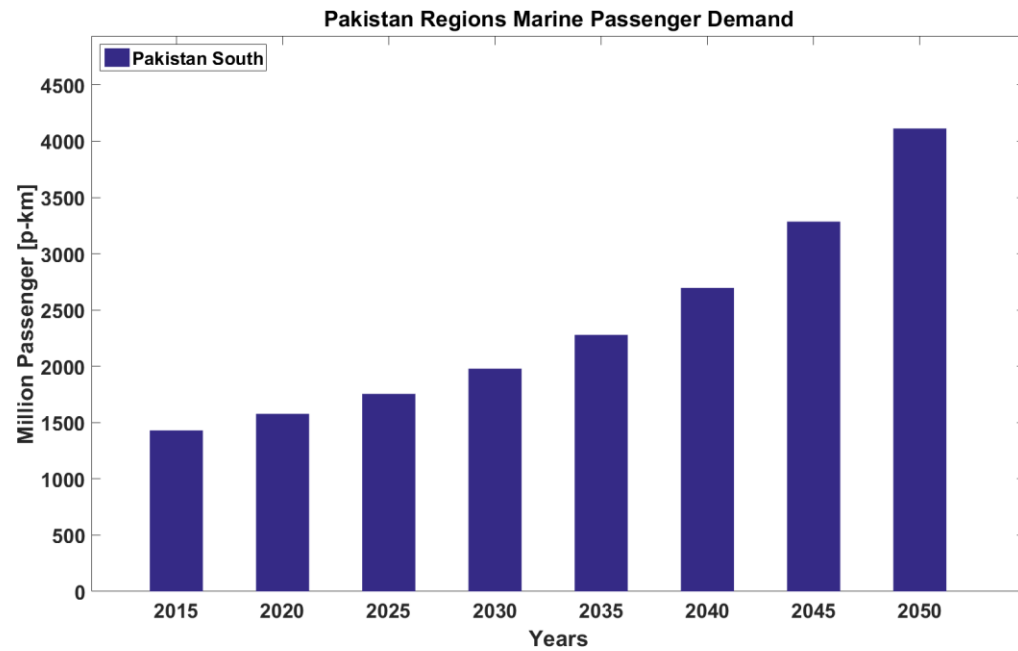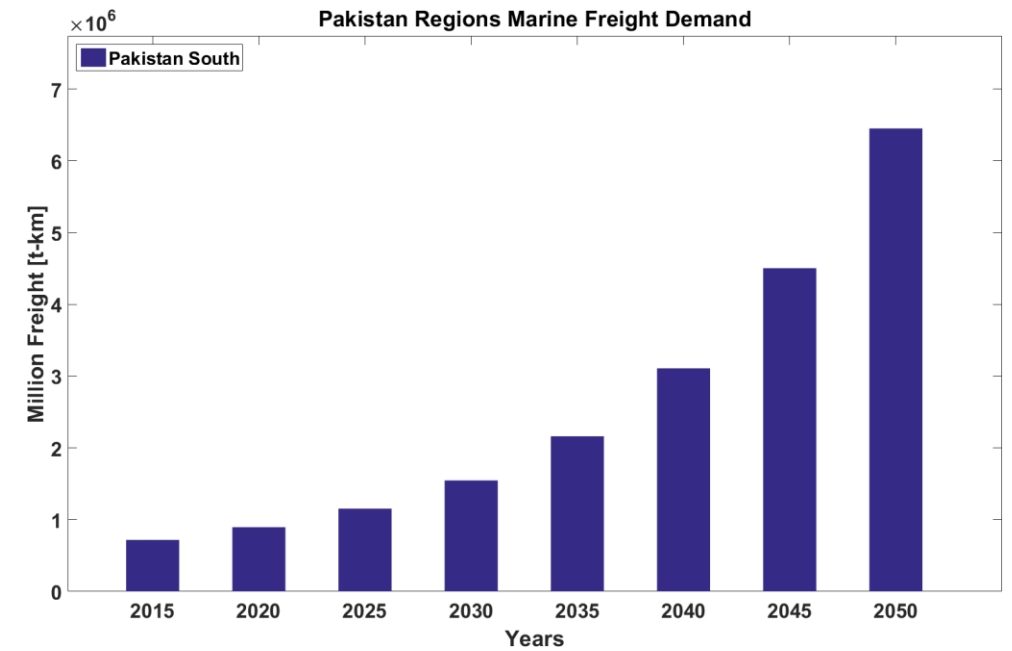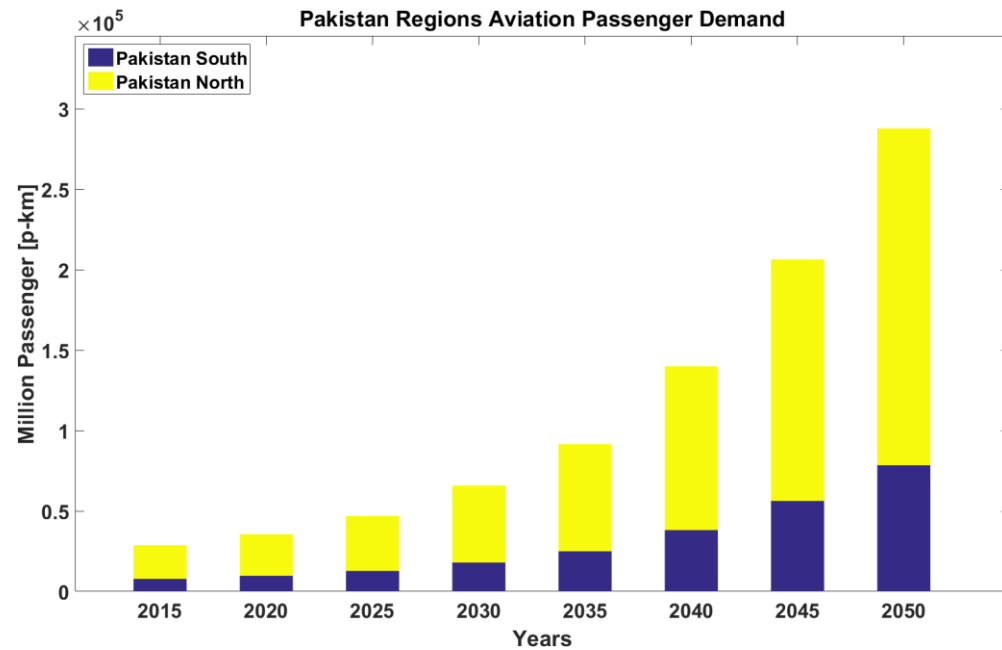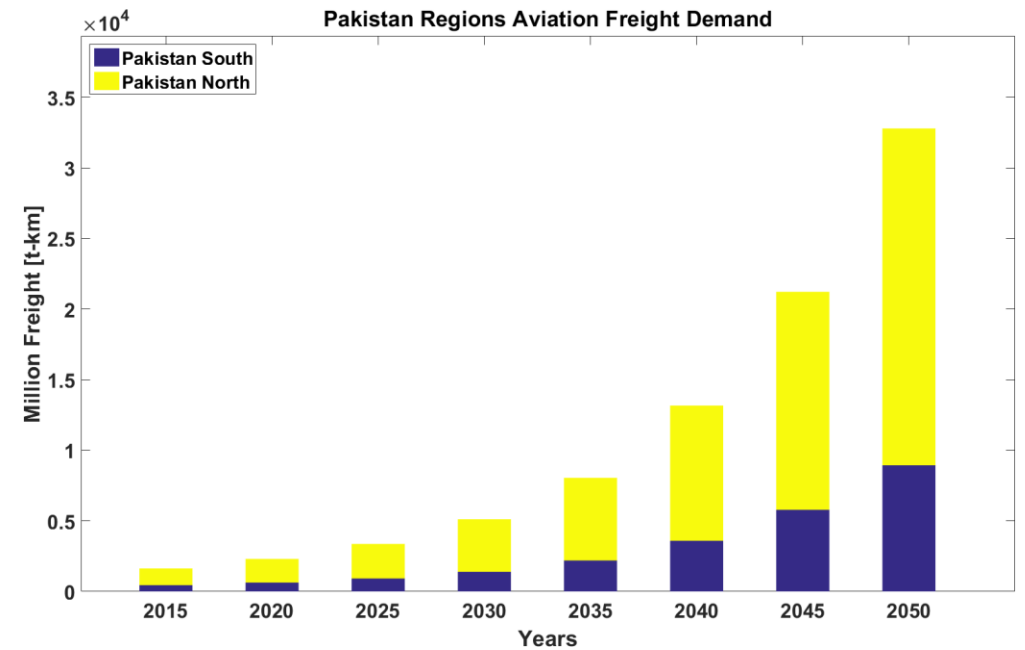

Palau Republic Federated States Road Passenger Demand

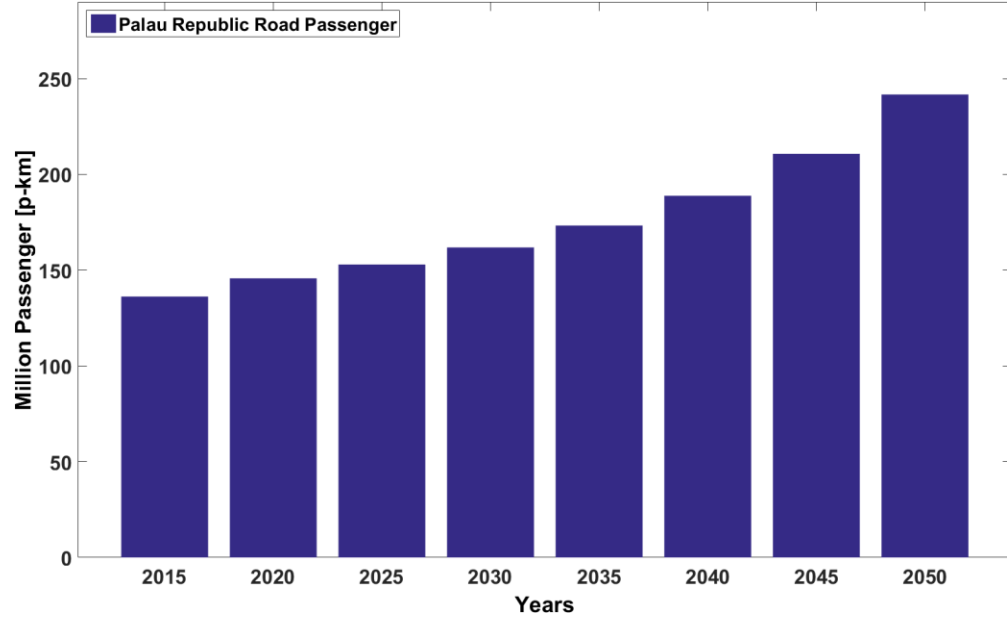

Palau Republic Road Freight Demand

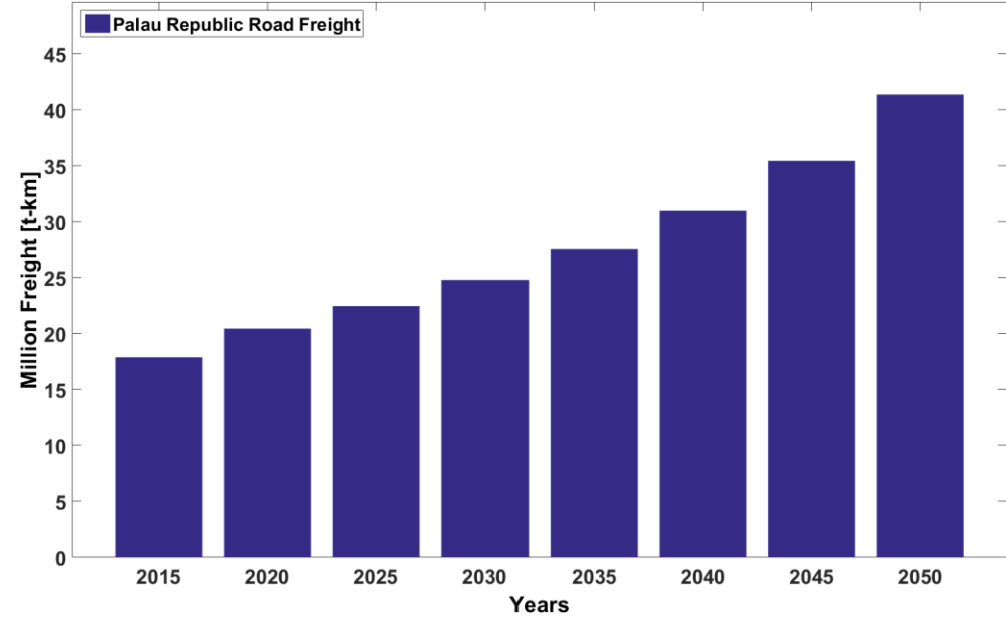

Palau Republic Rail Passenger Demand

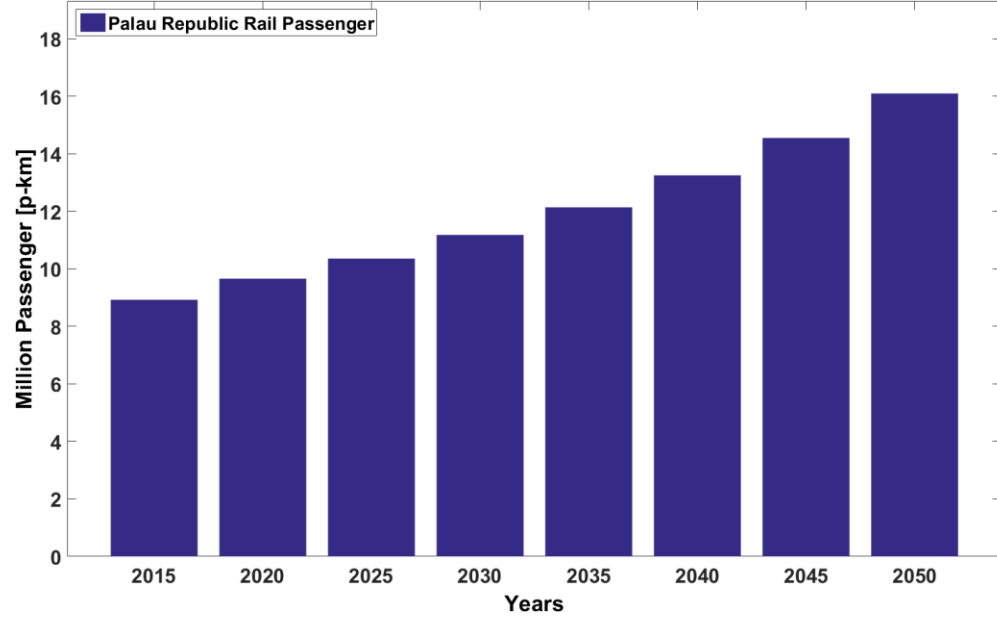

Palau Republic Rail Freight Demand

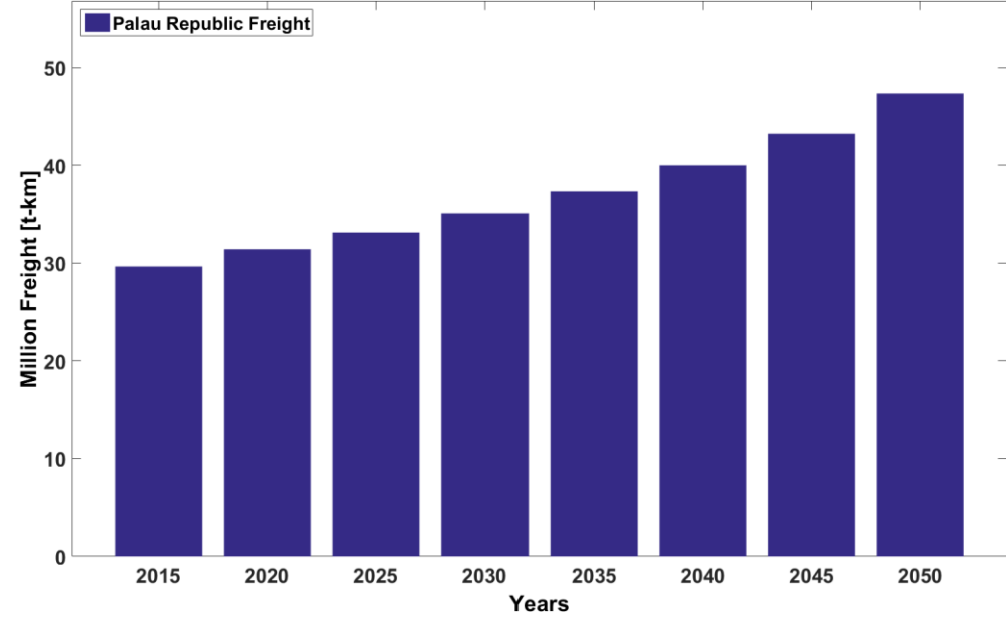

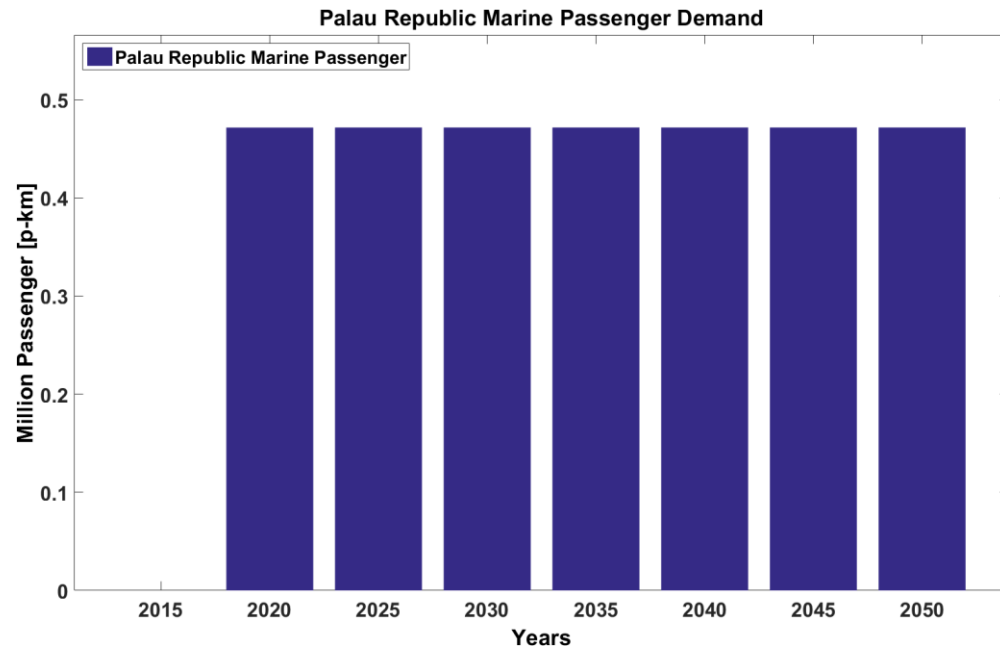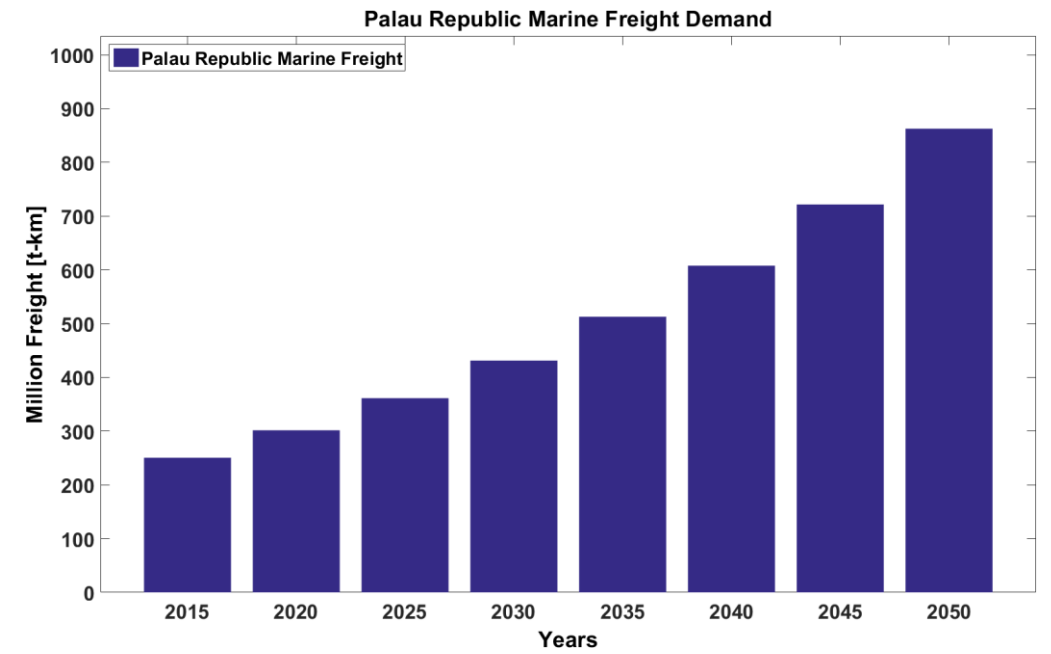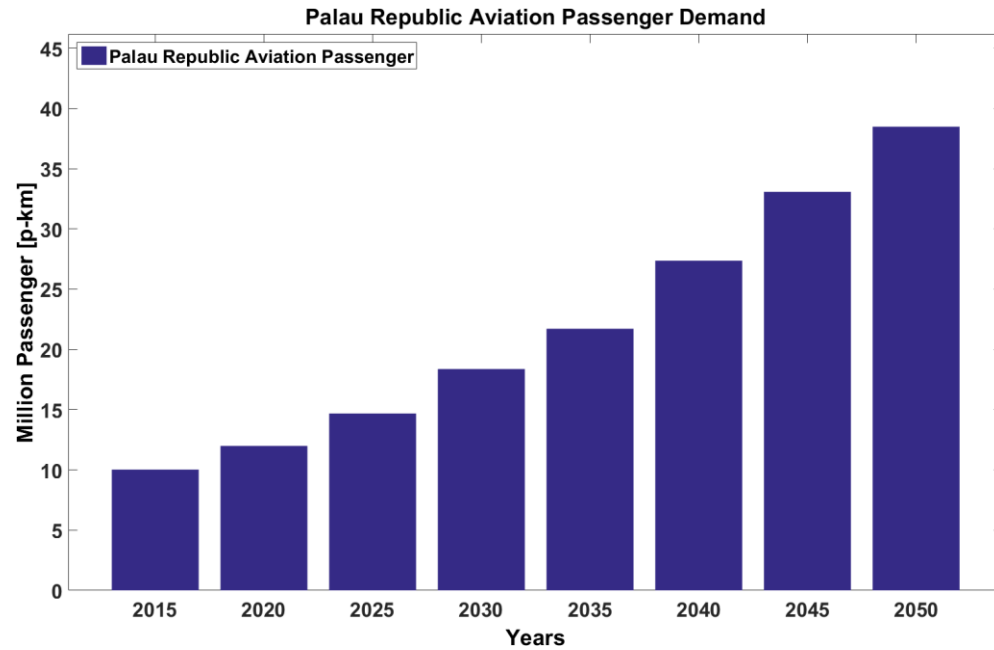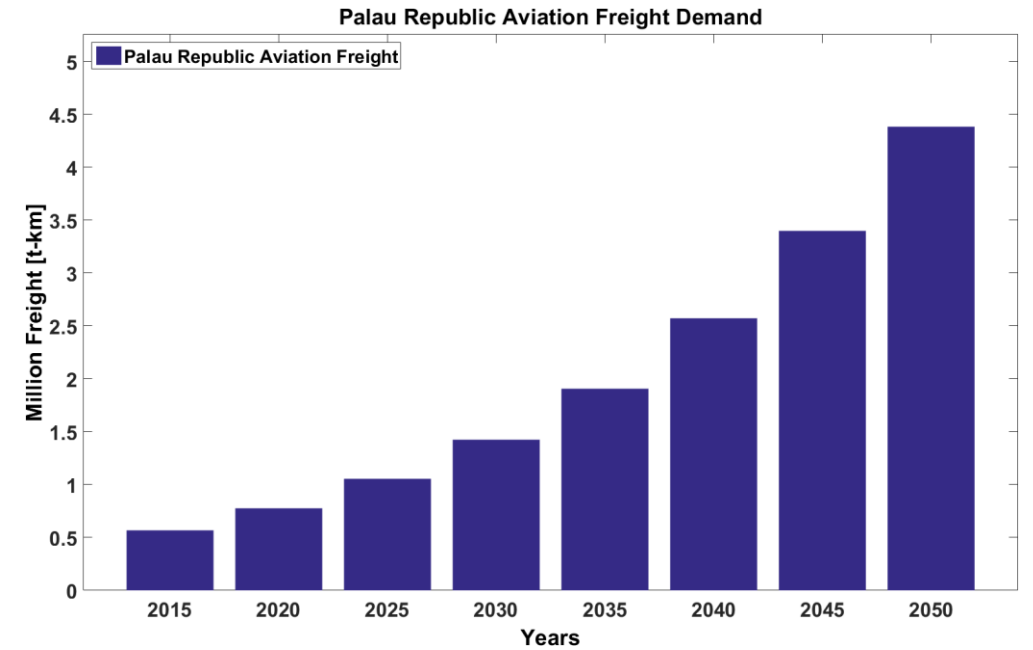

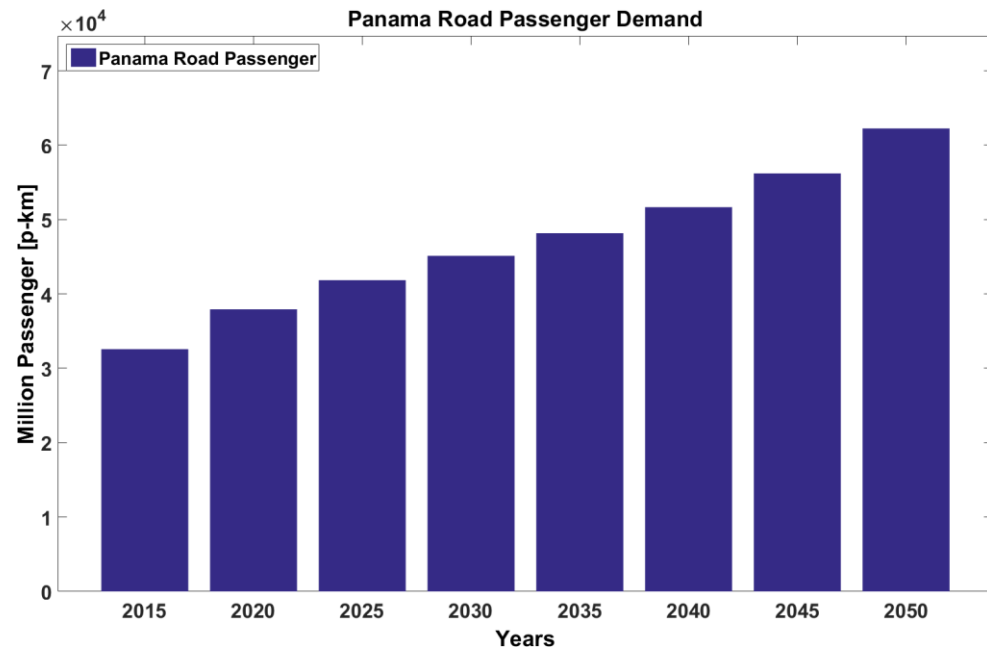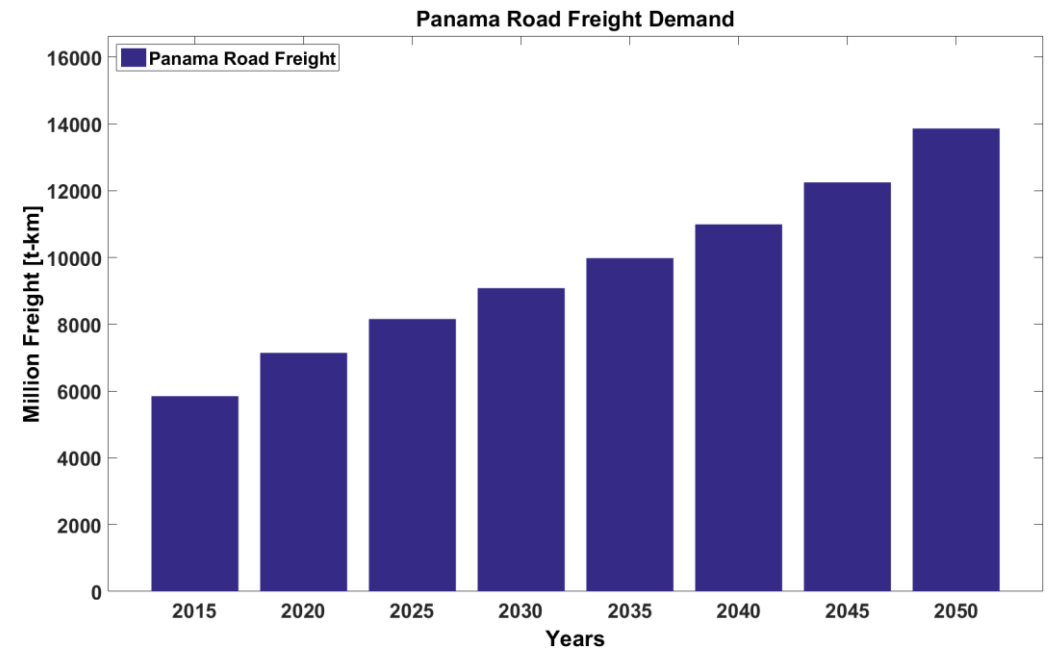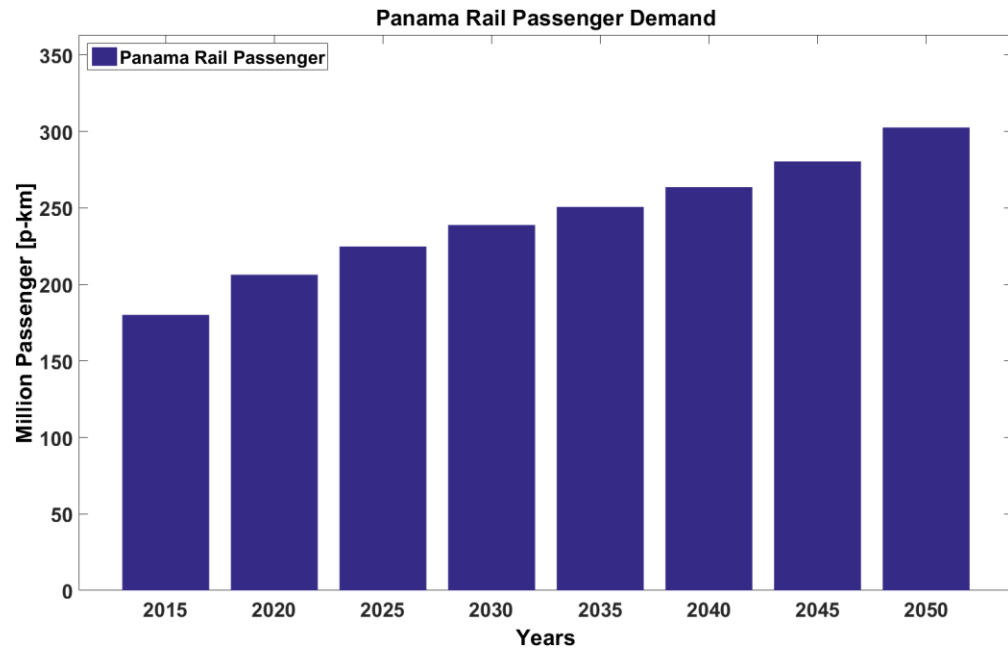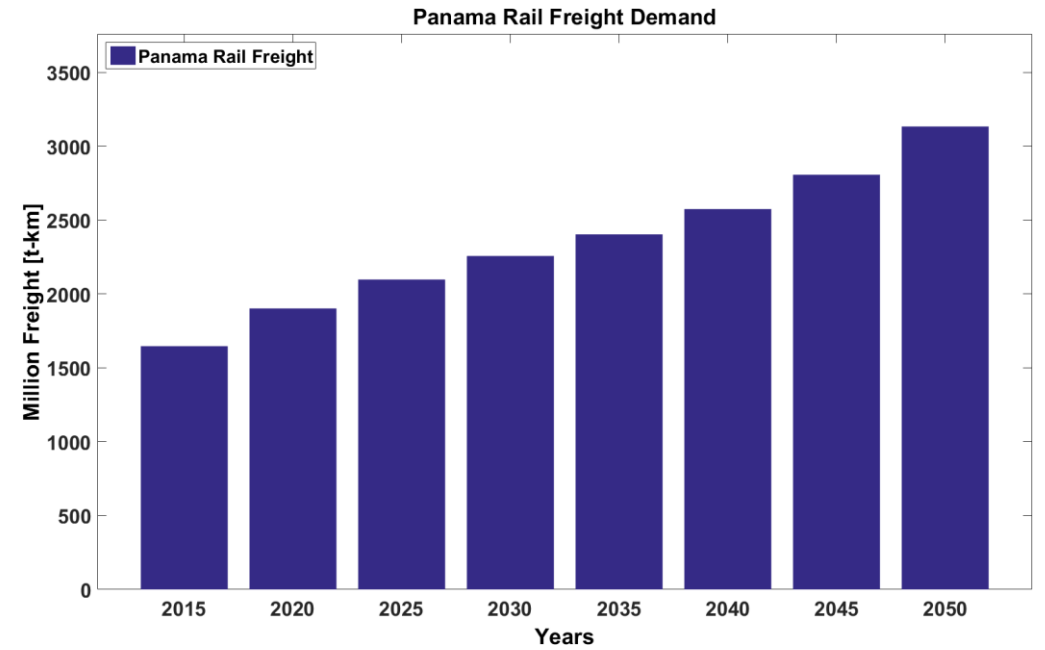

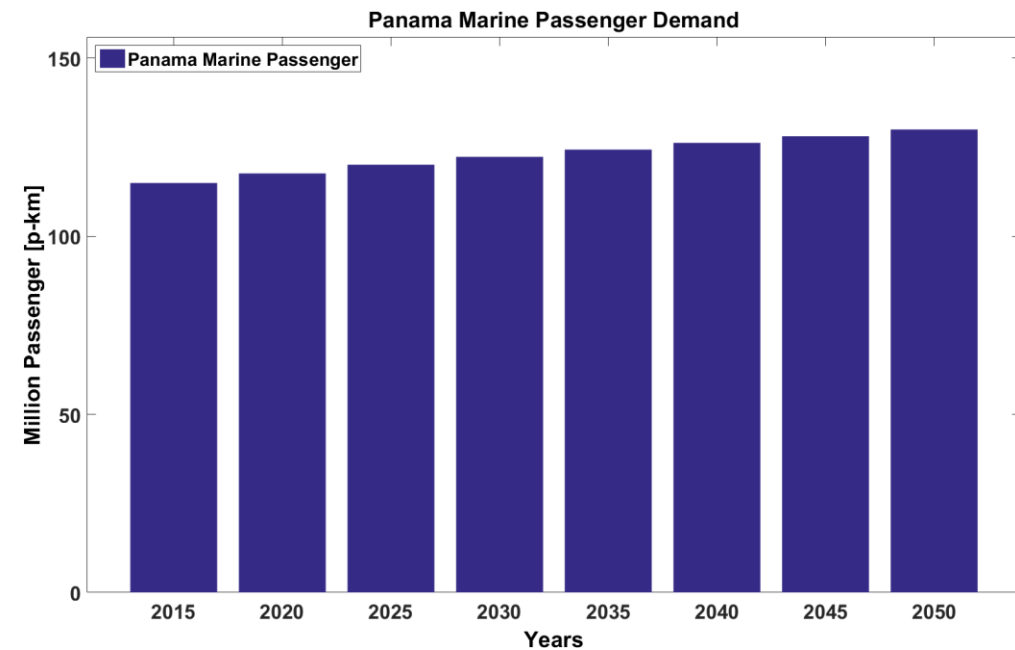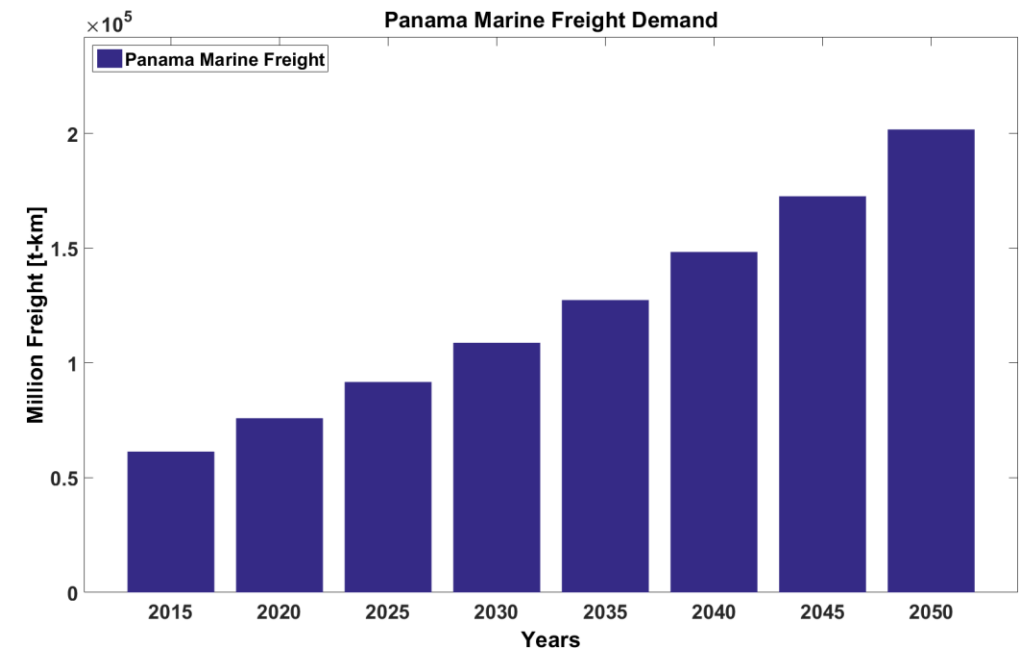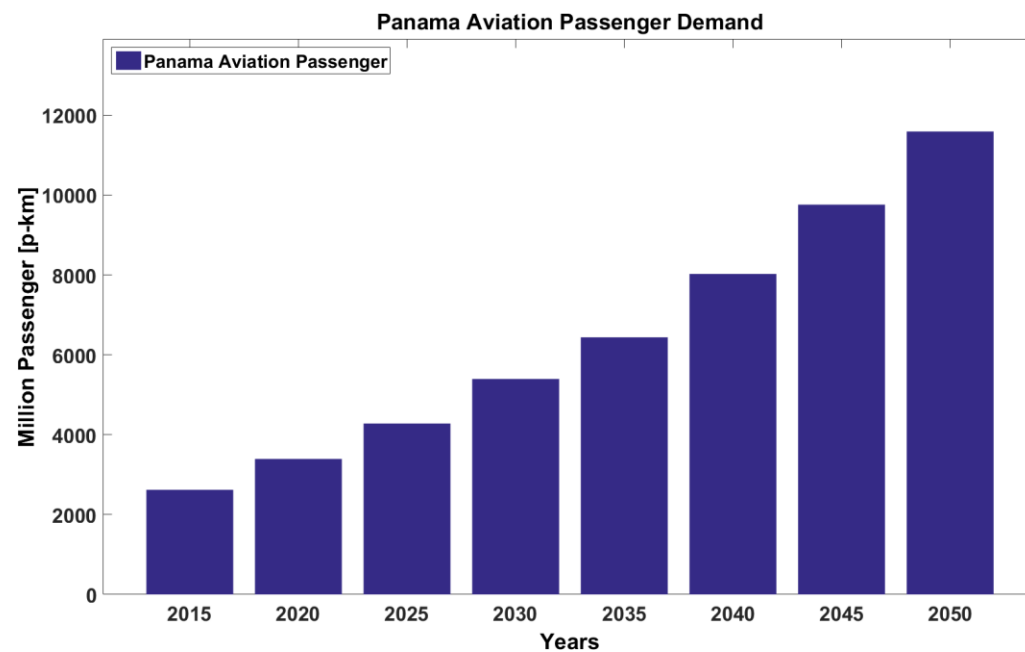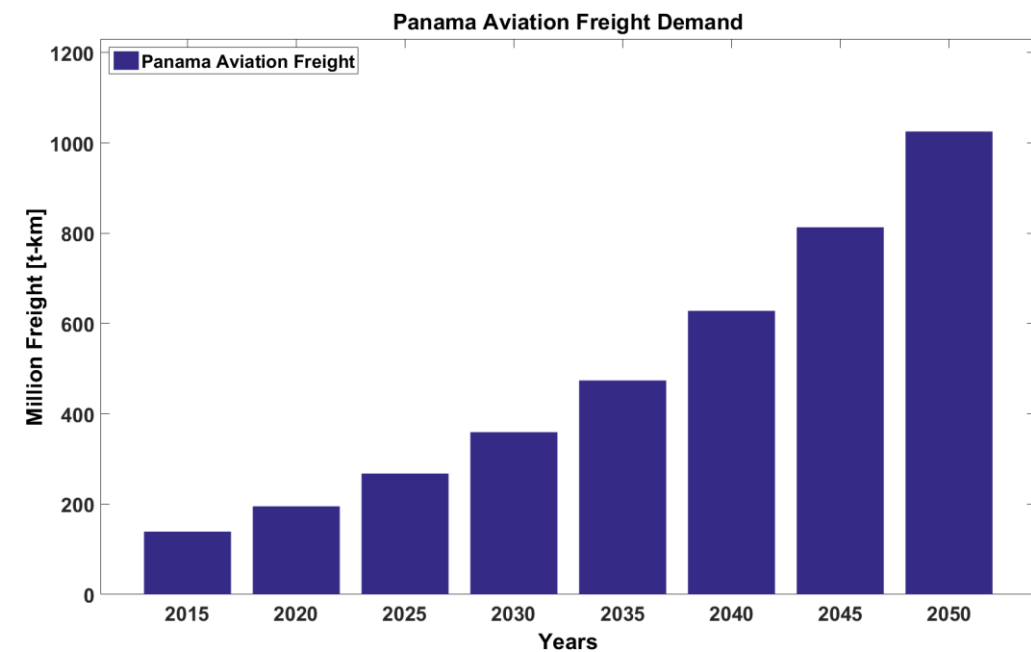

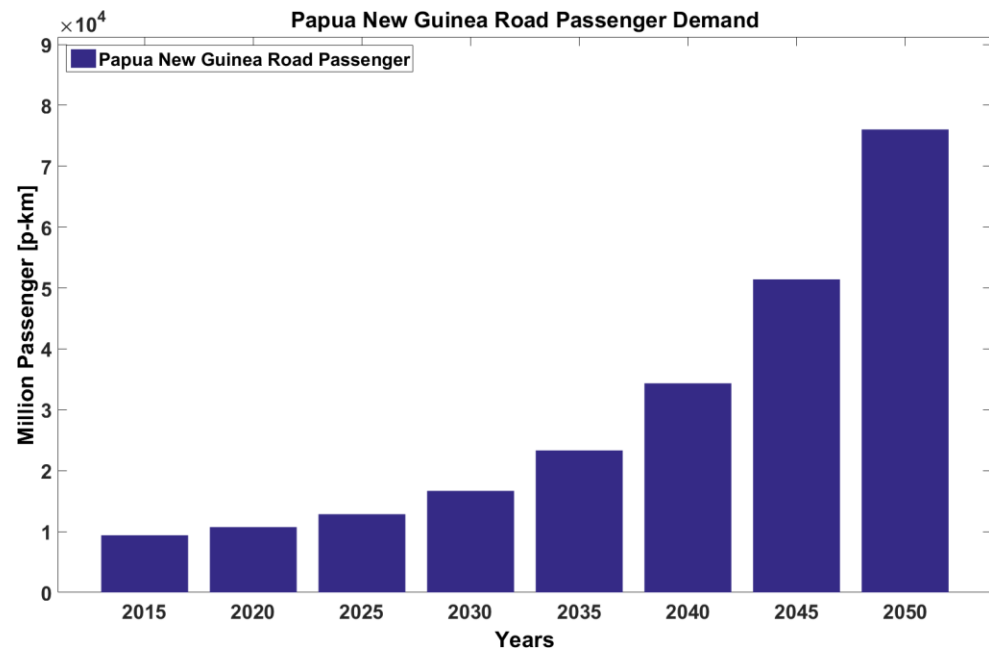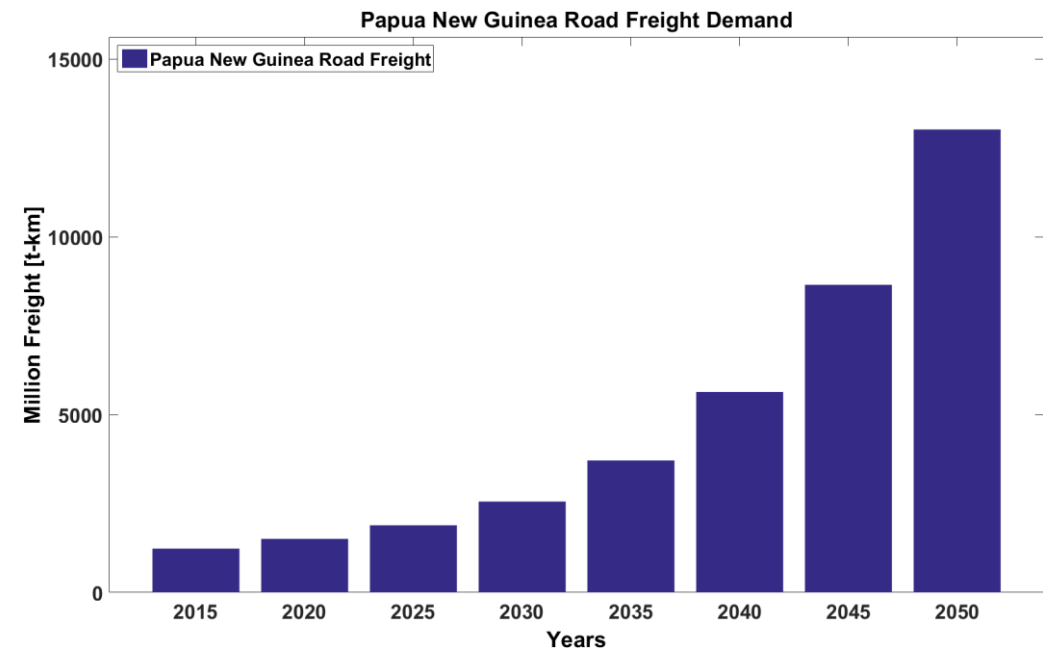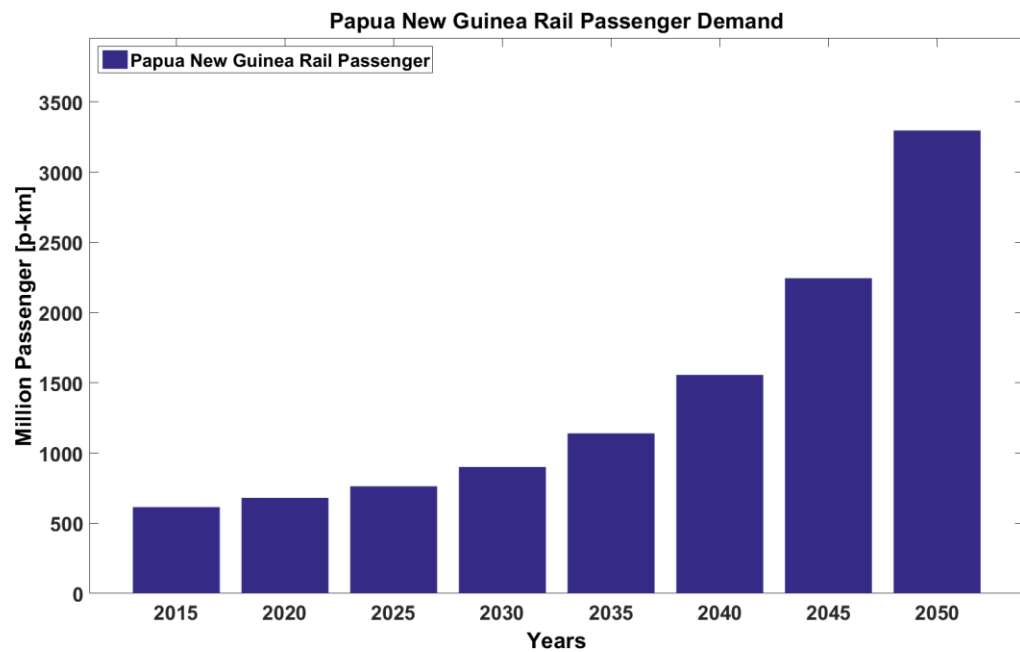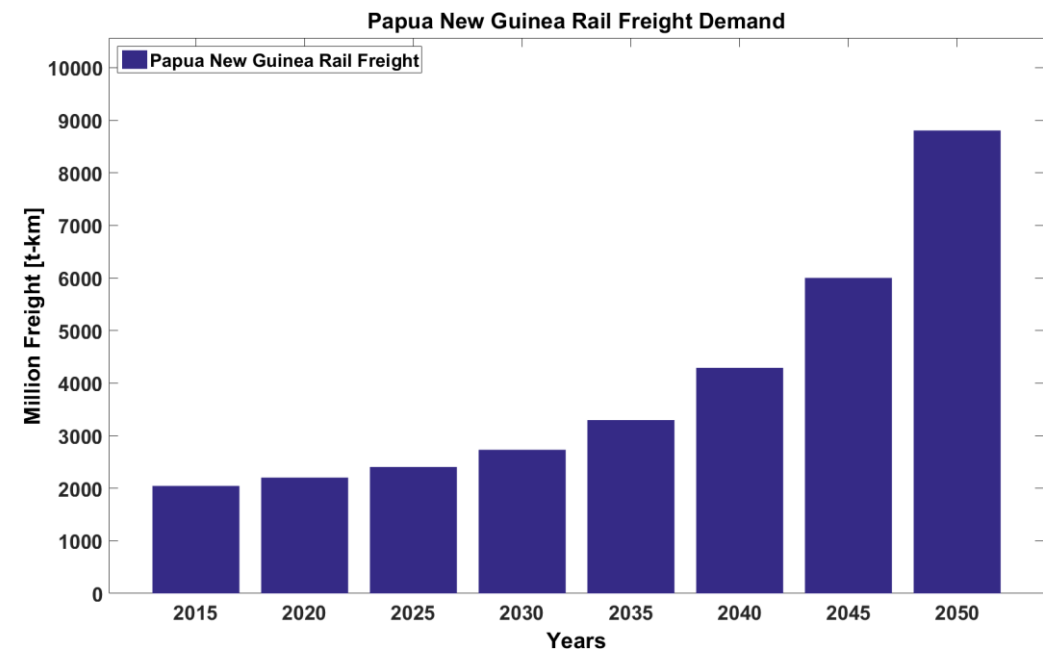

Papua New Guinea Marine Passenger Demand

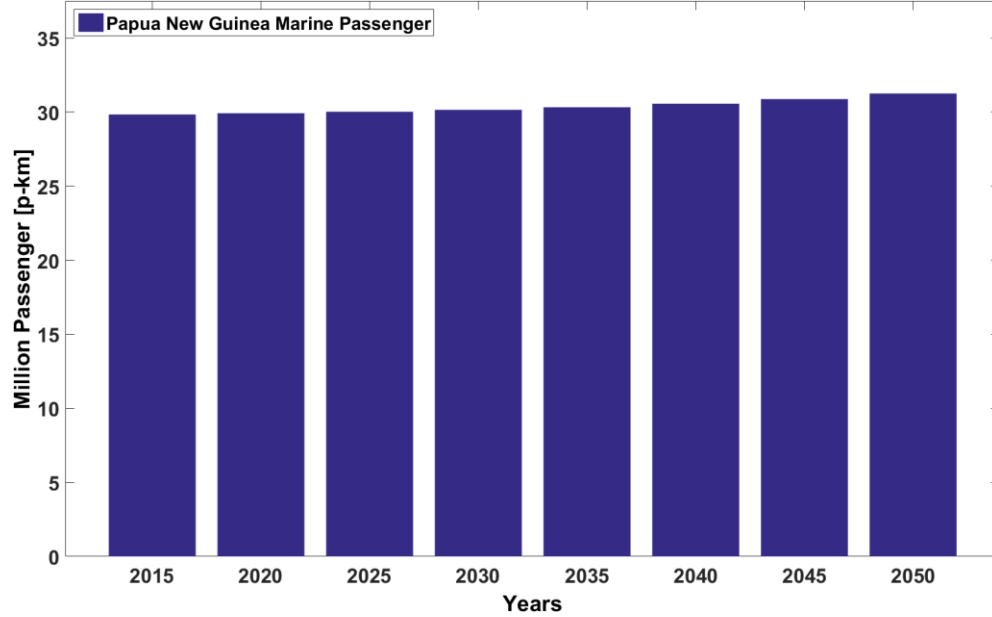

Papua New Guinea Marine Freight Demand

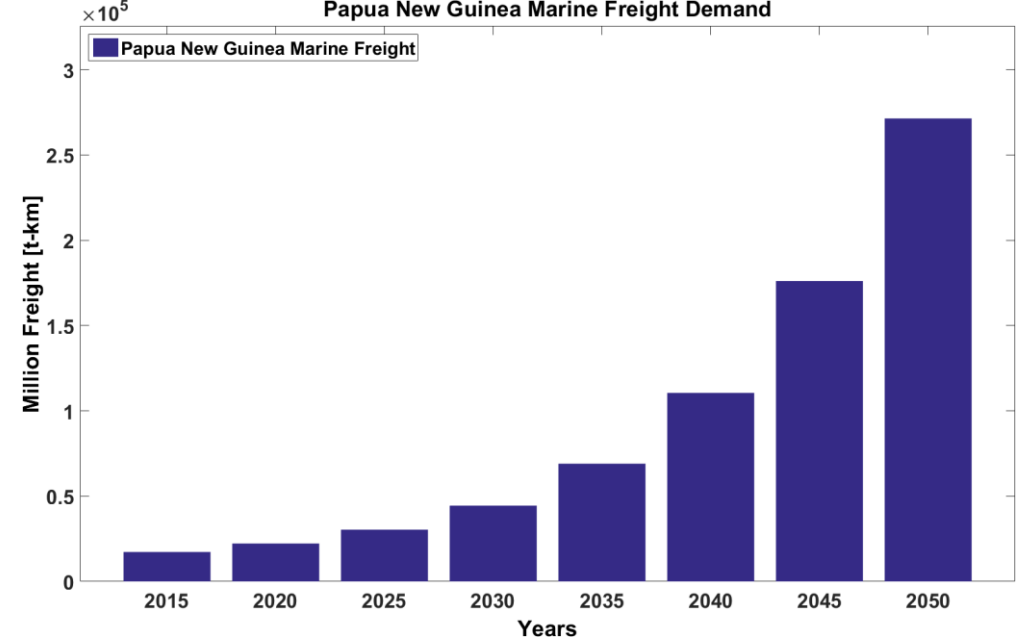

Papua New Guinea Aviation Passenger Demand

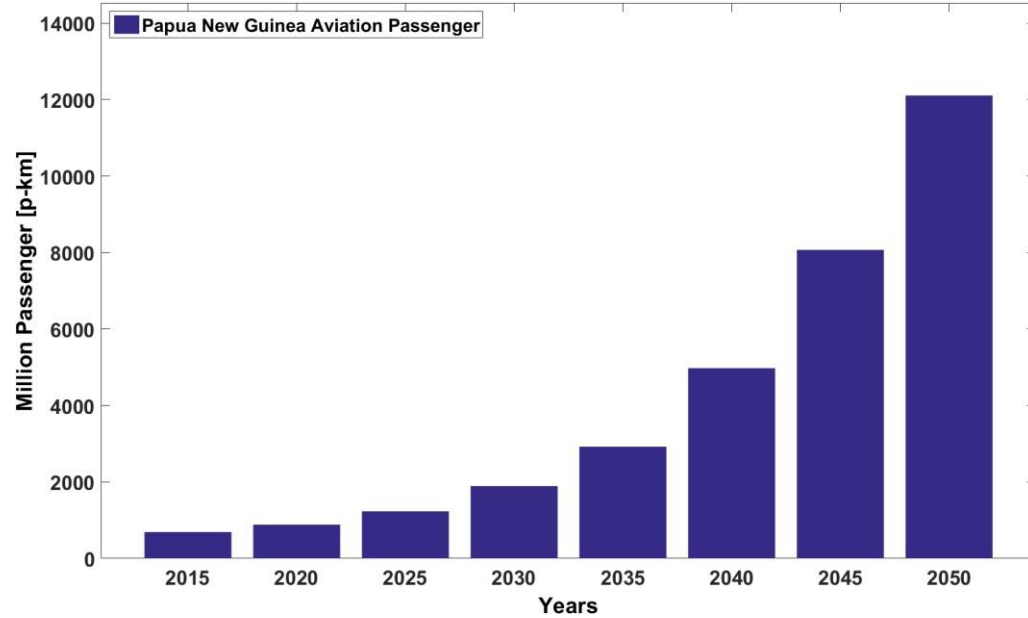

Papua New Guinea Aviation Freight Demand

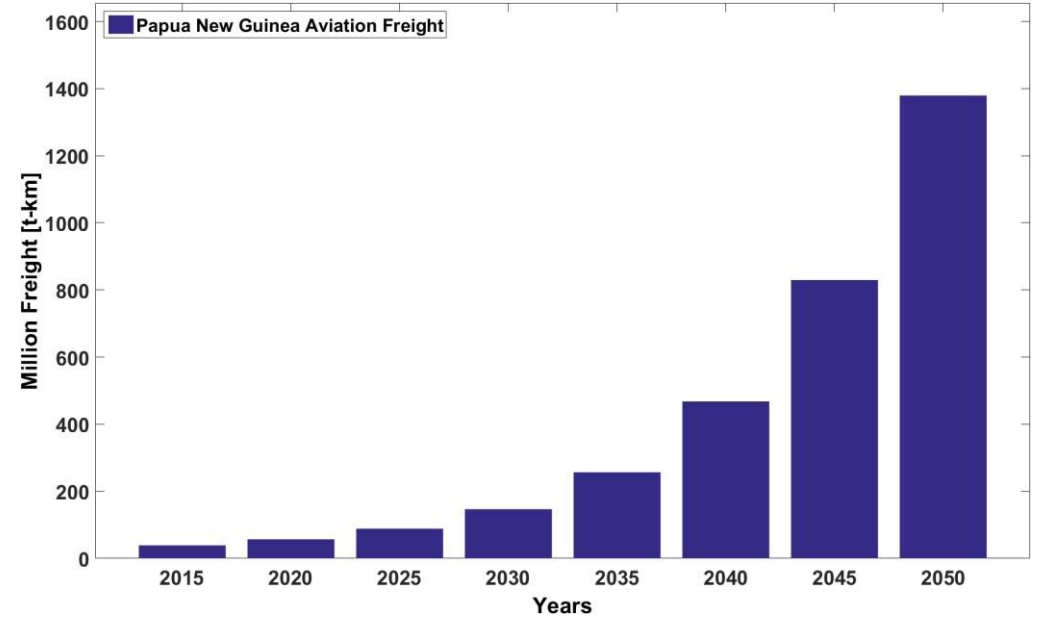

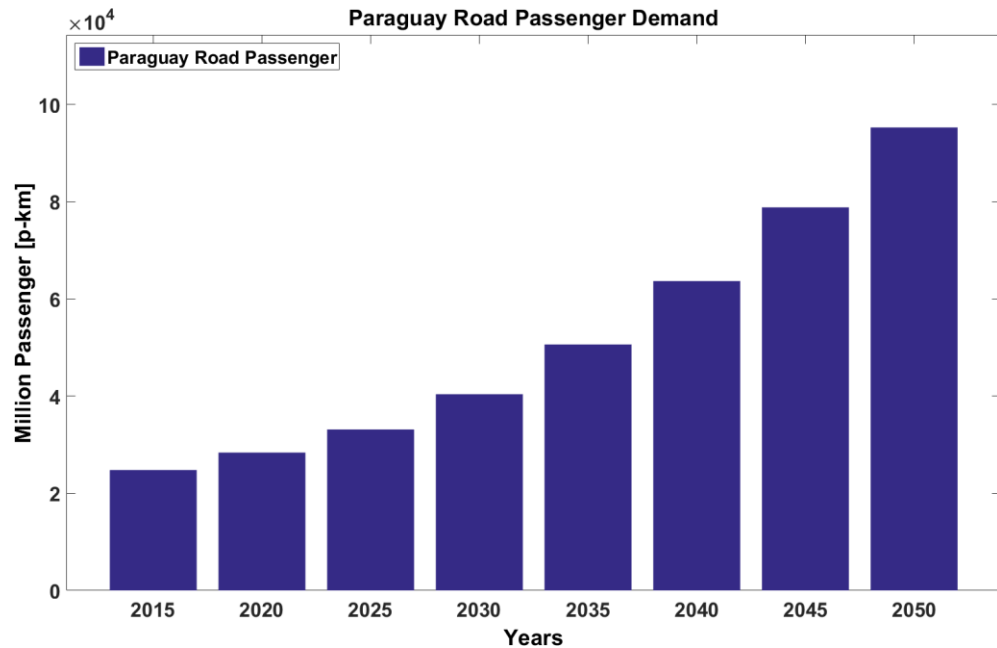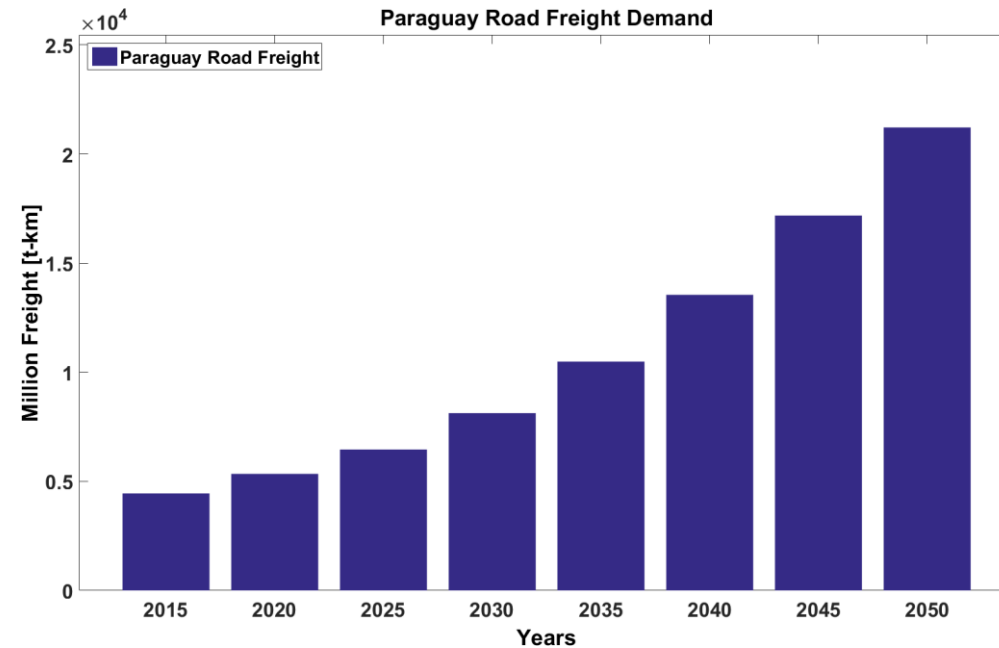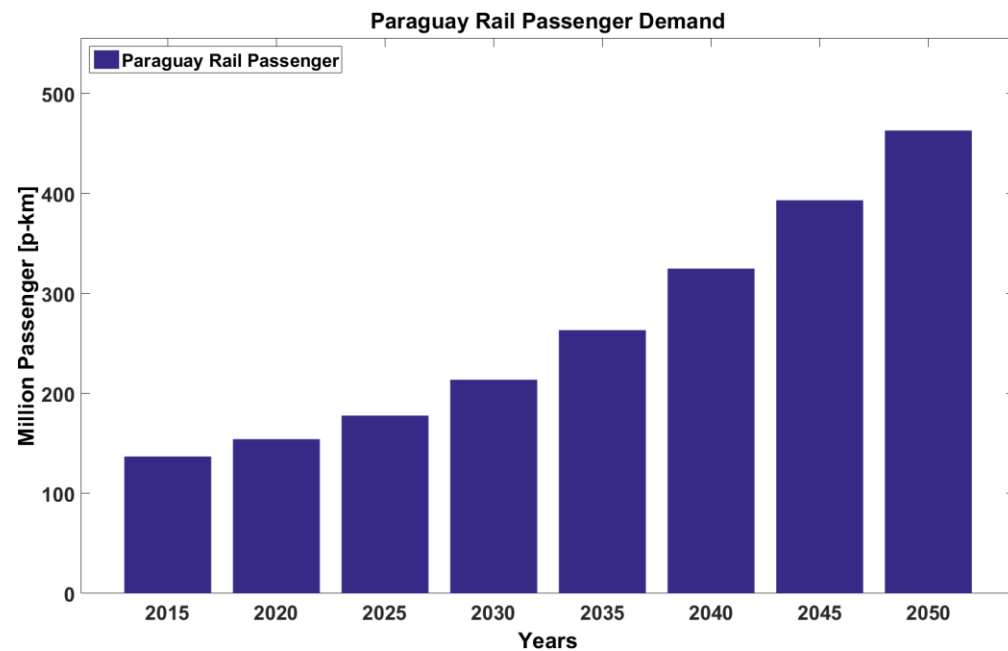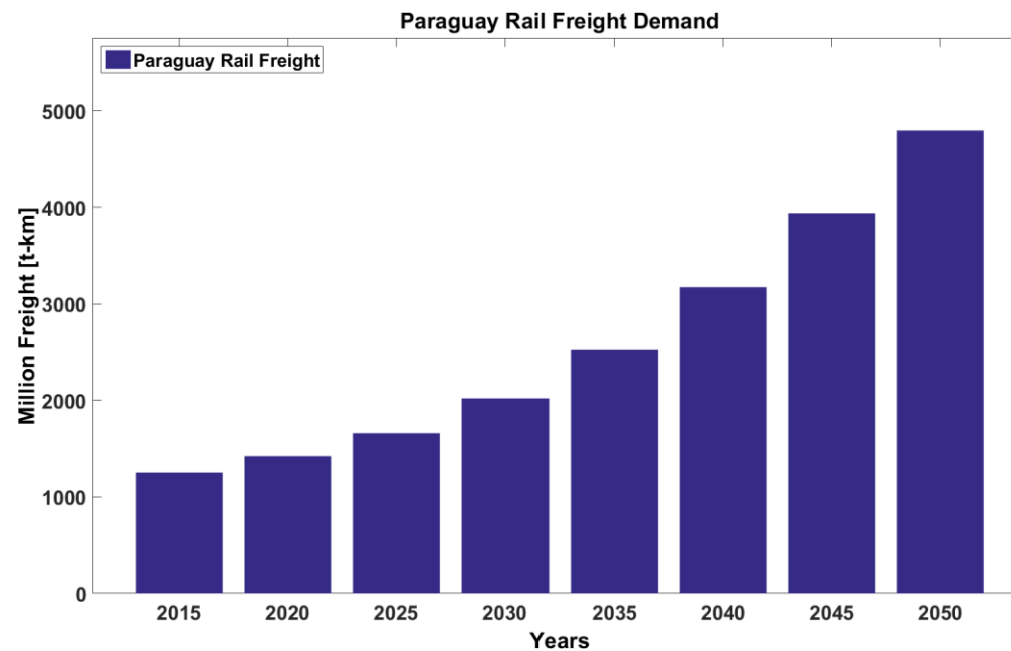

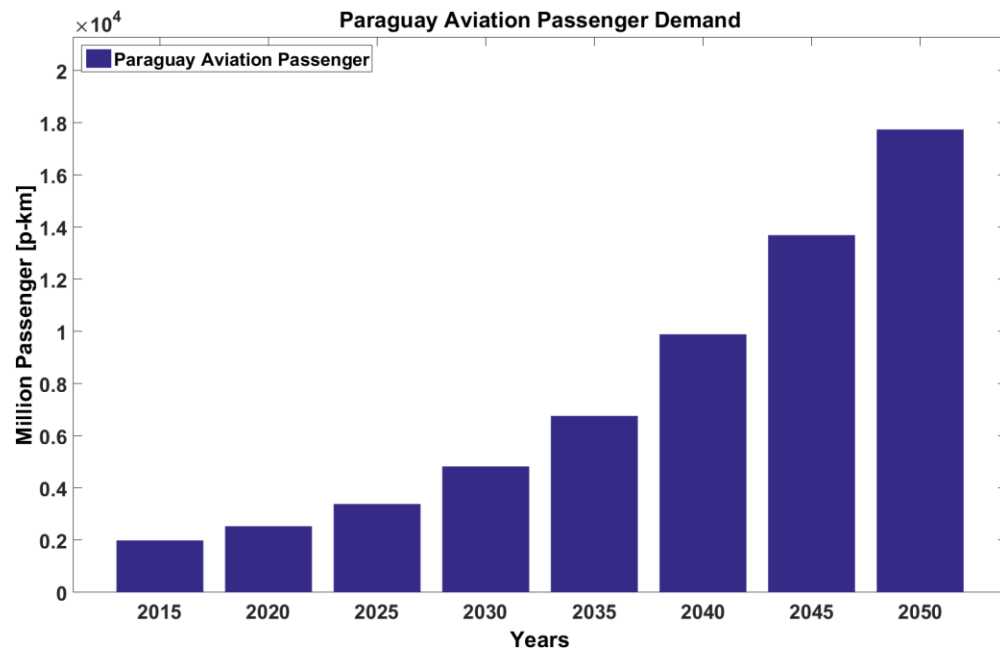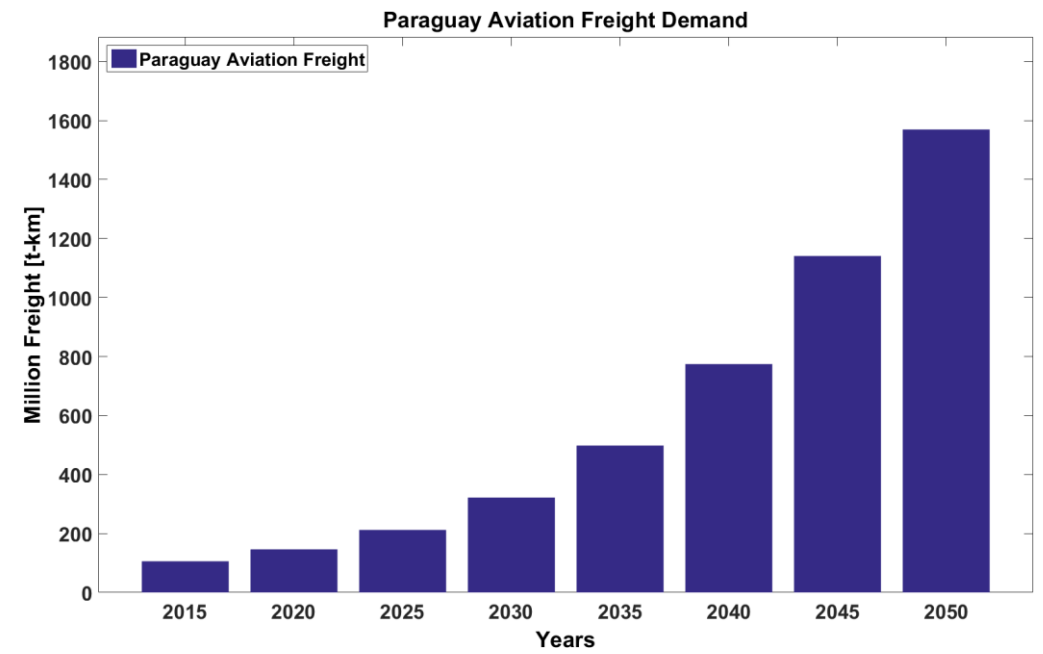

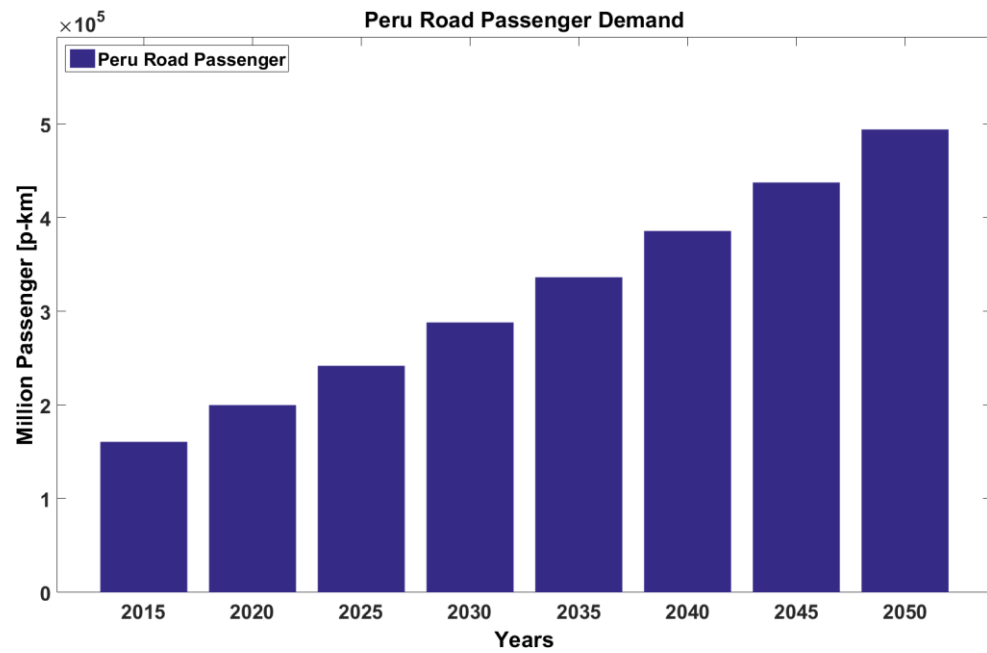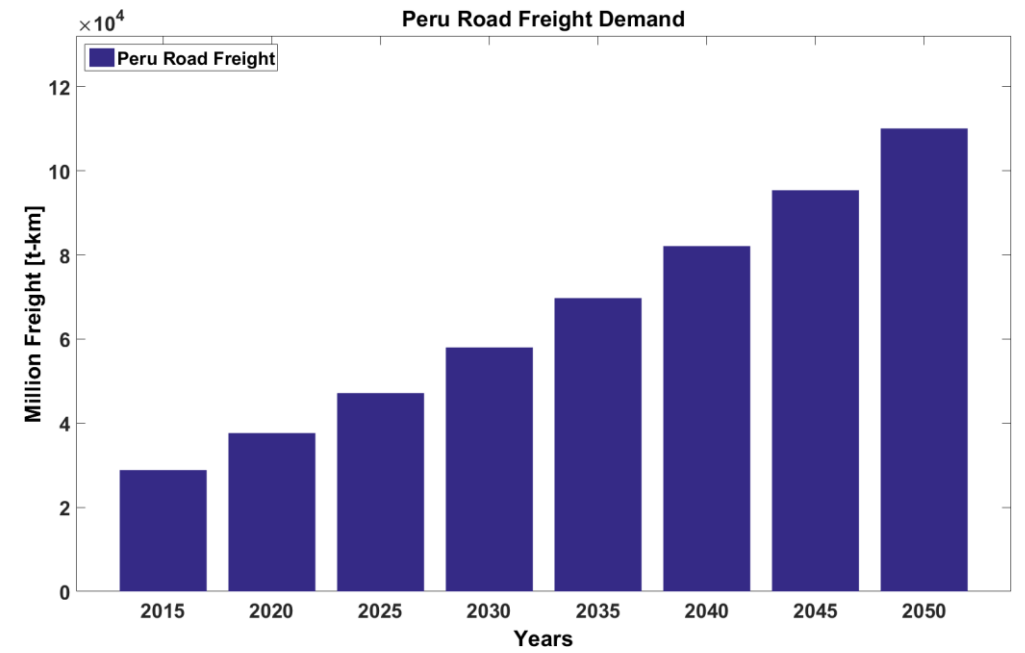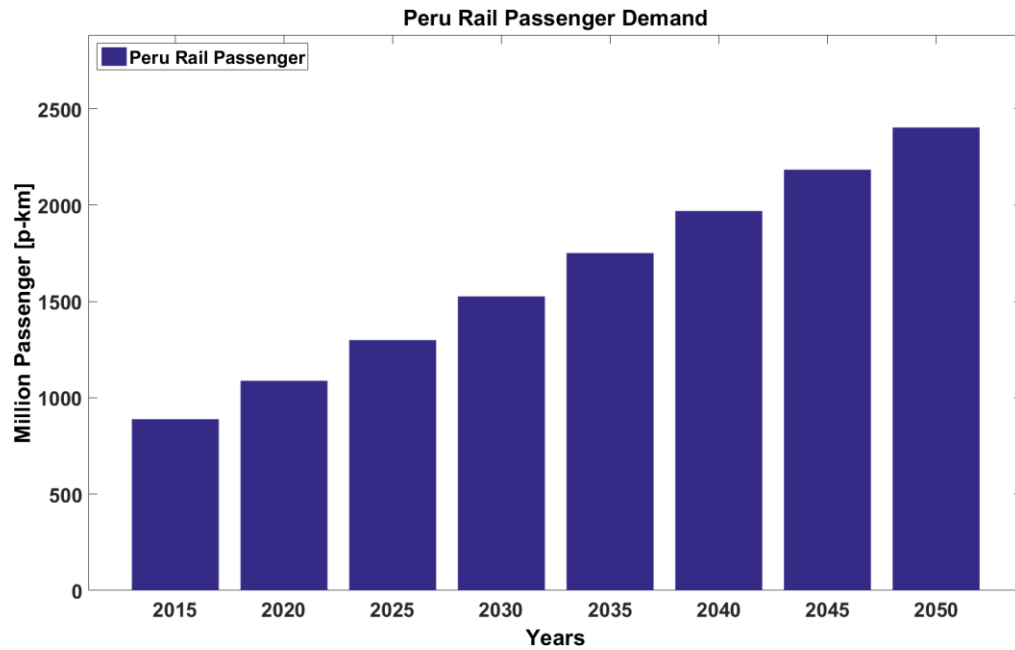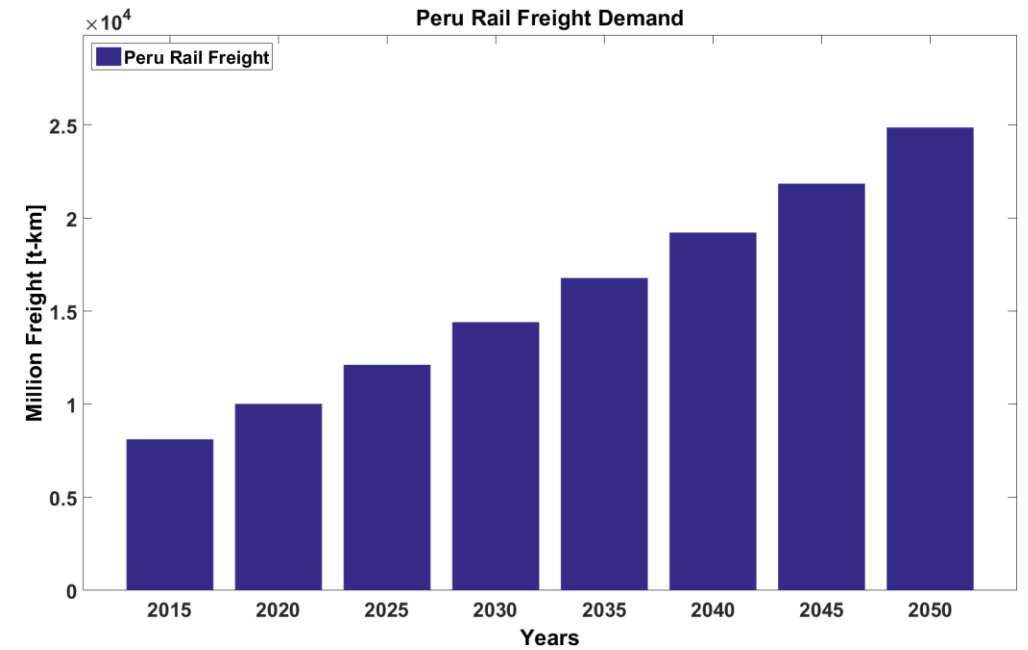

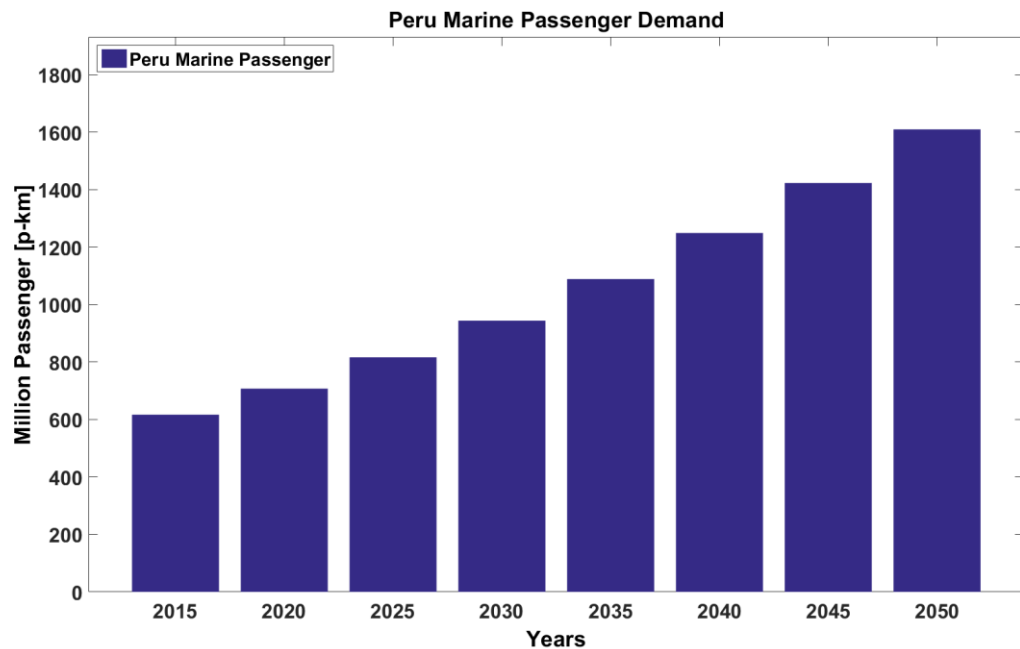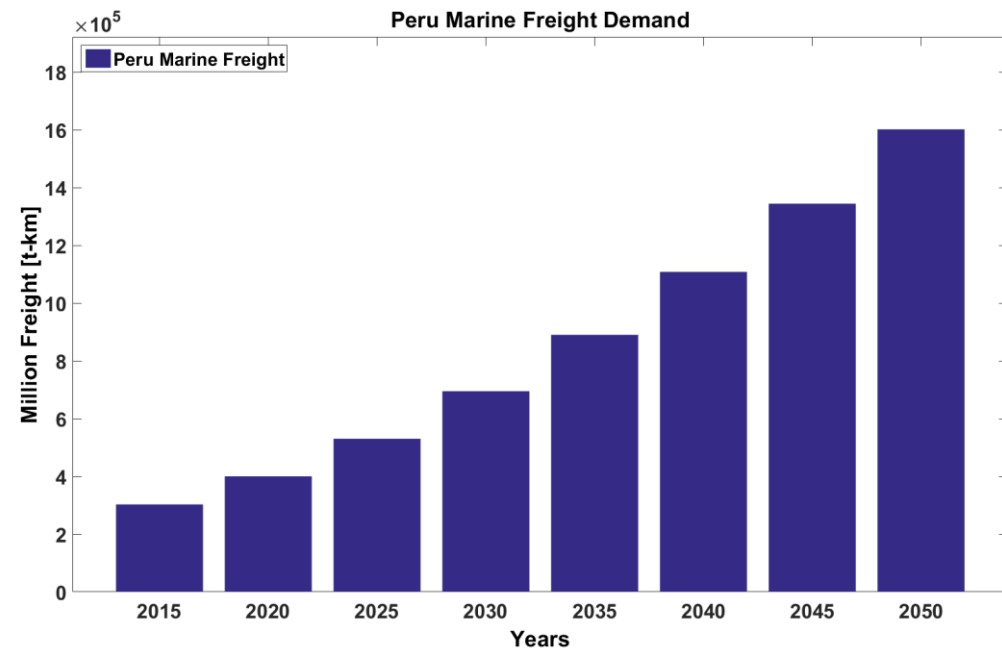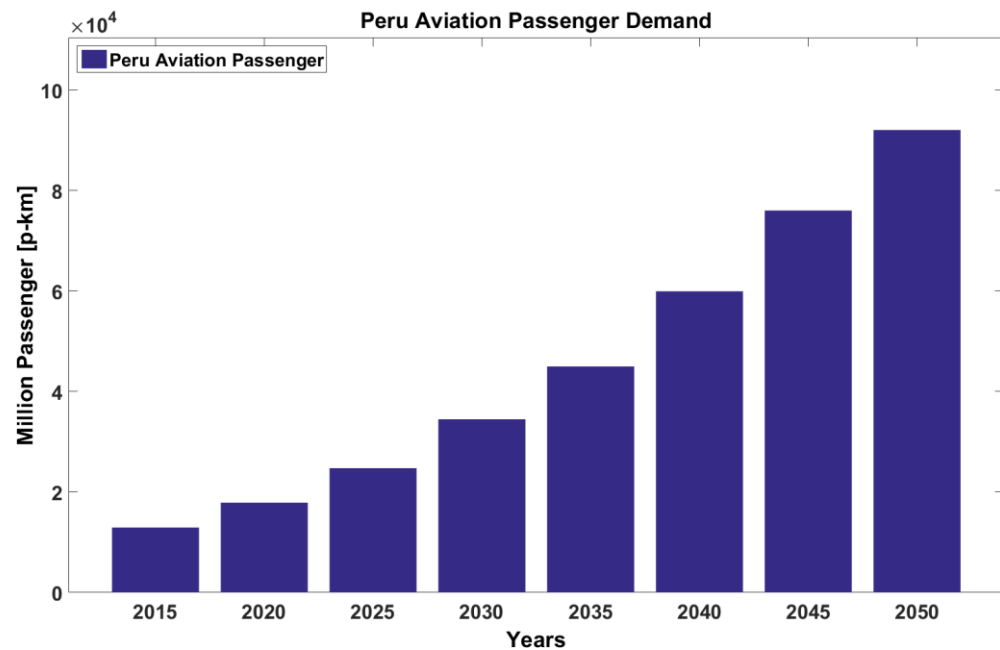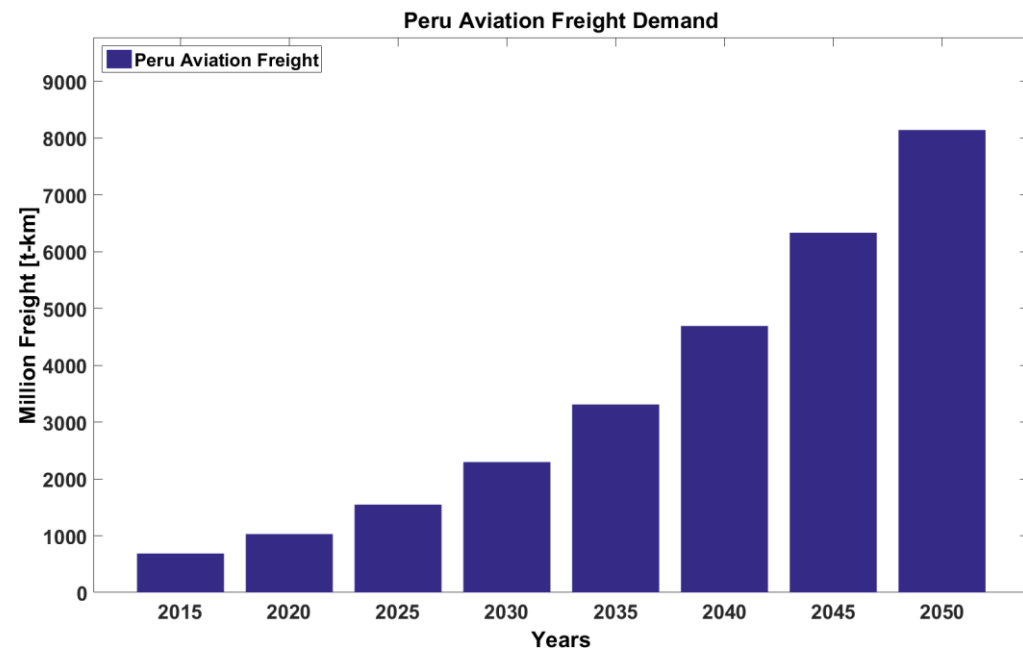

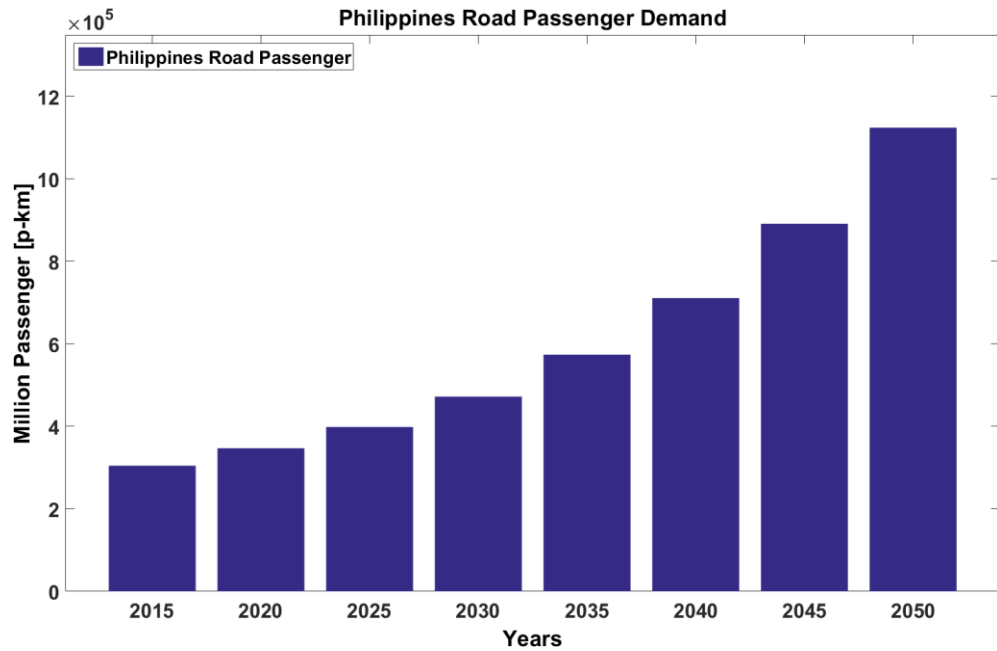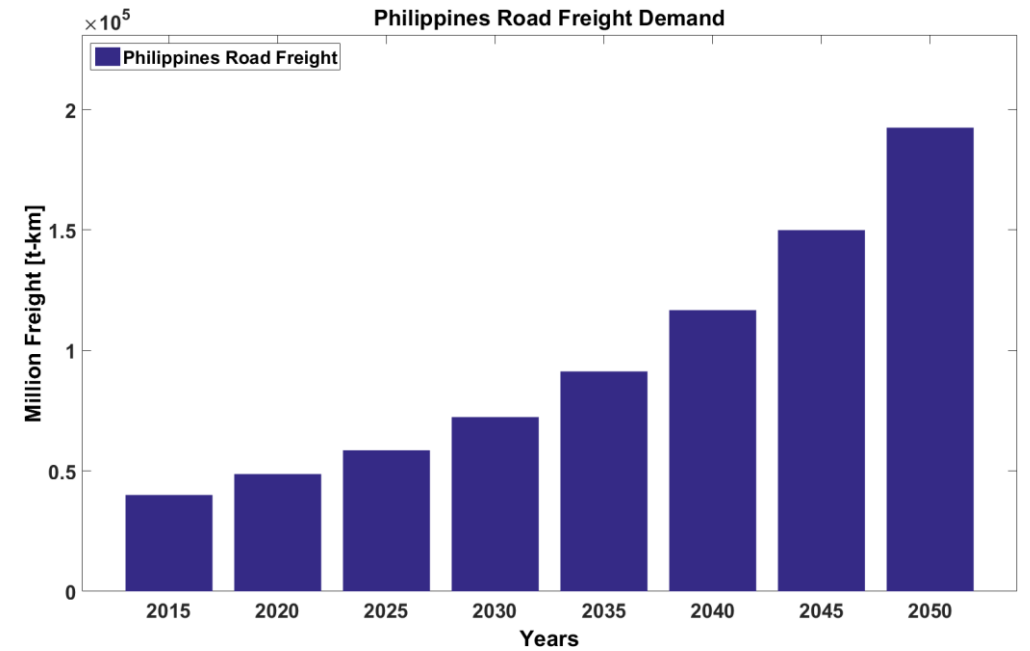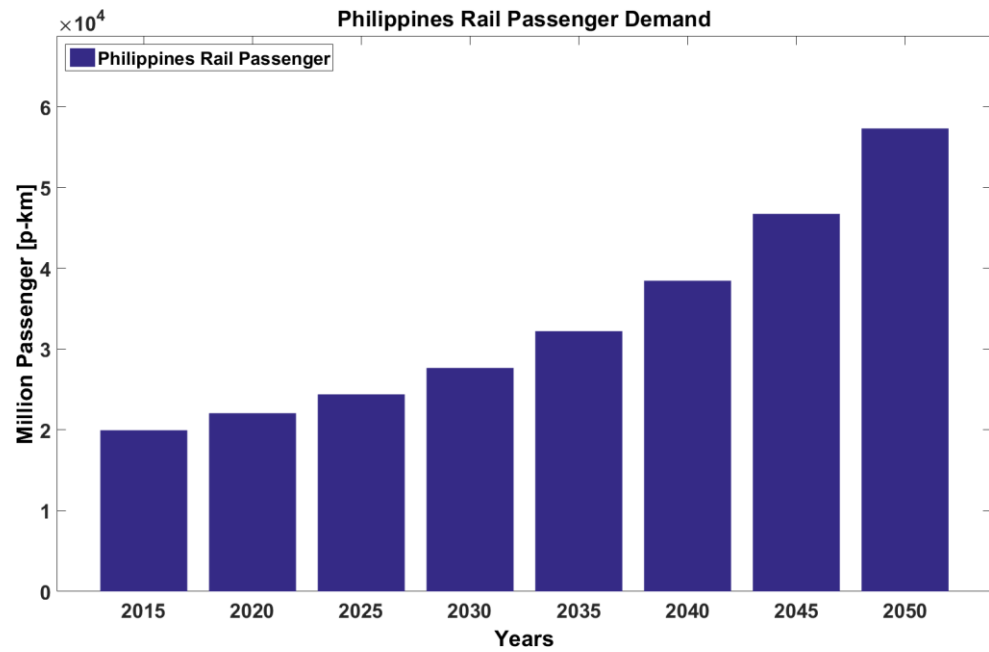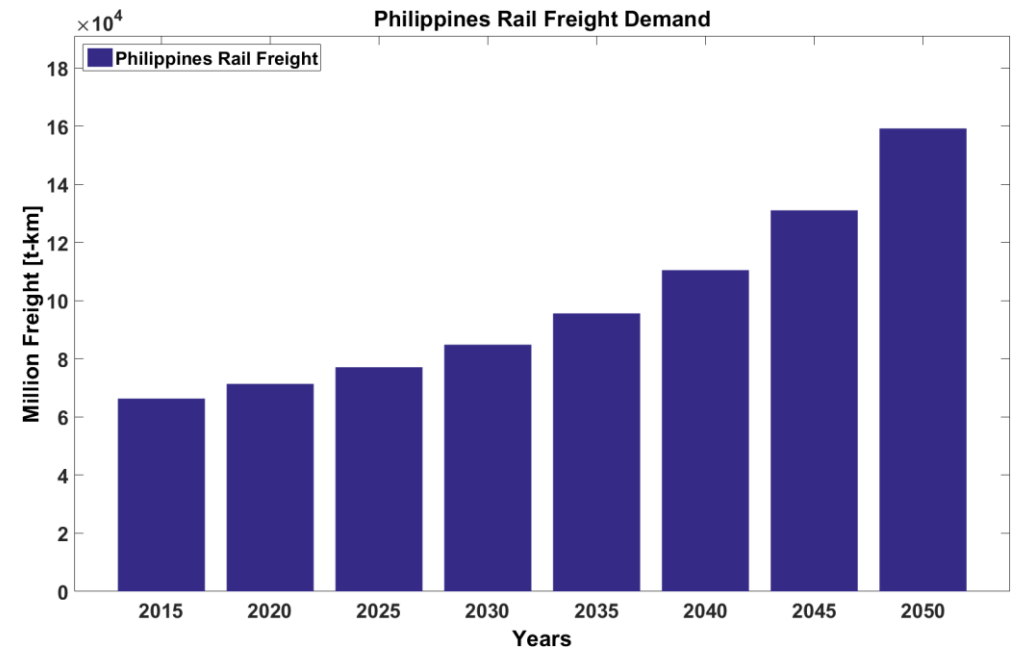

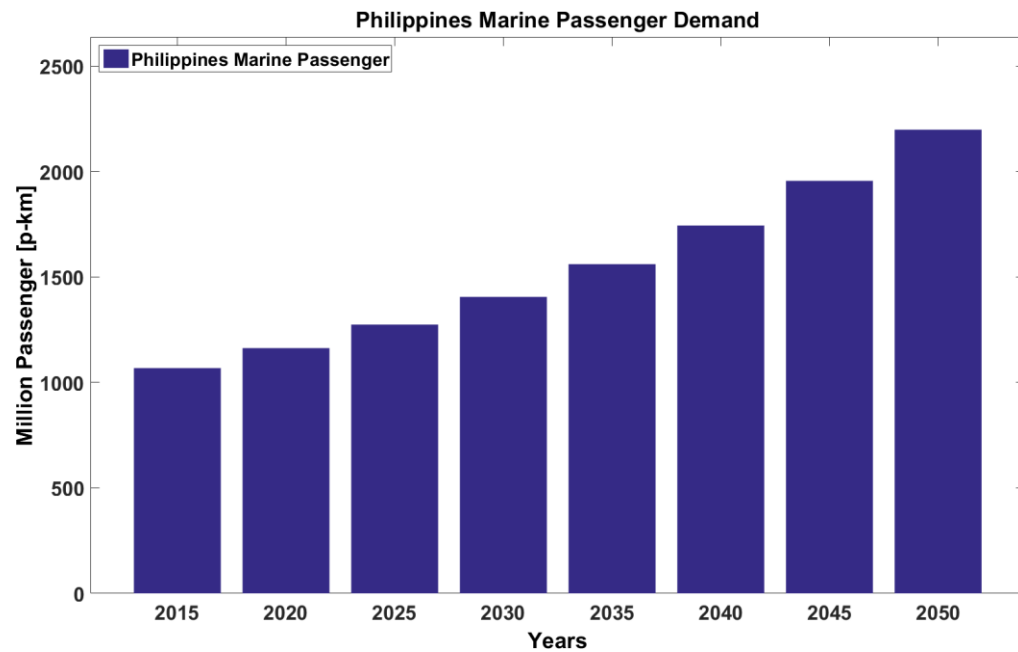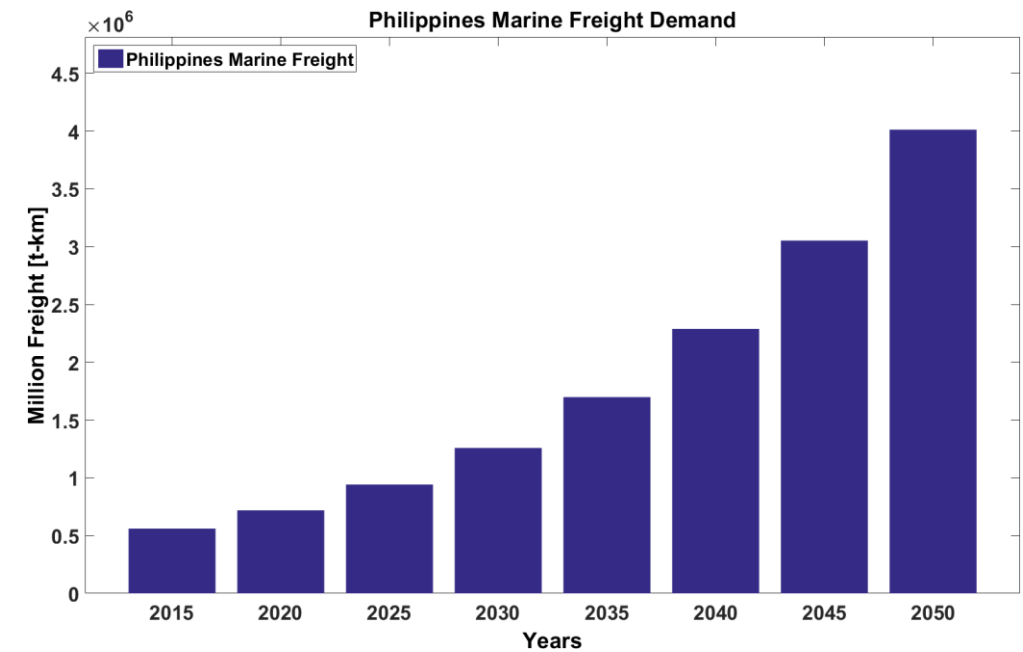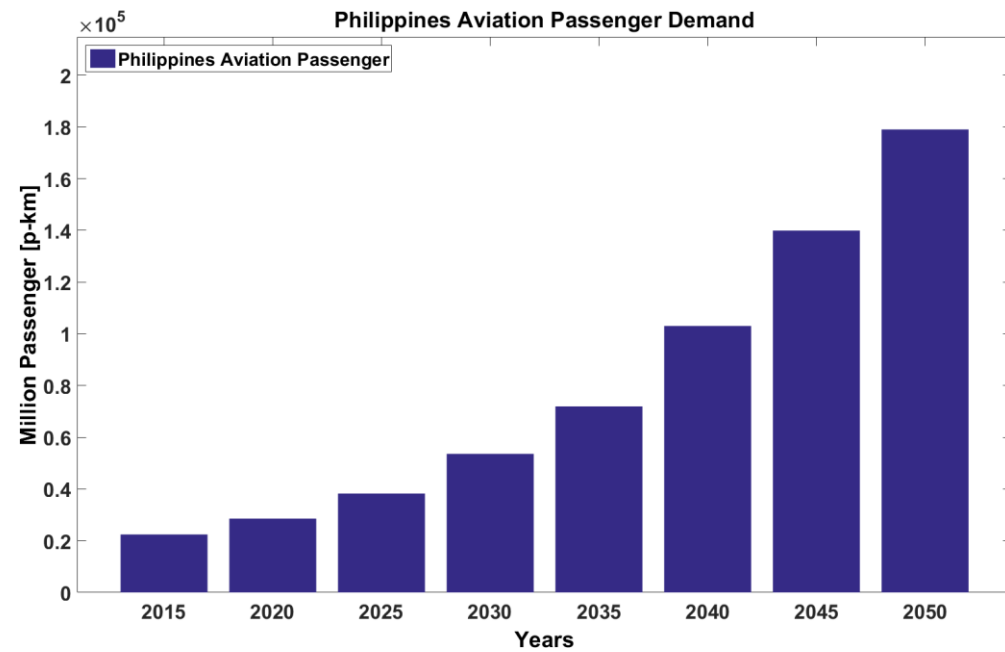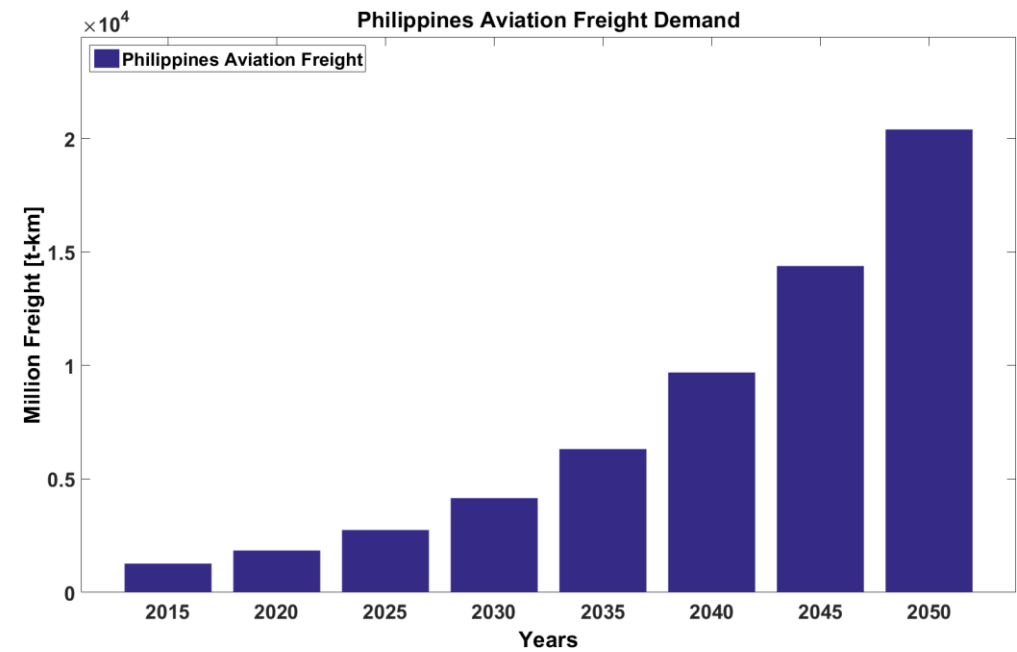

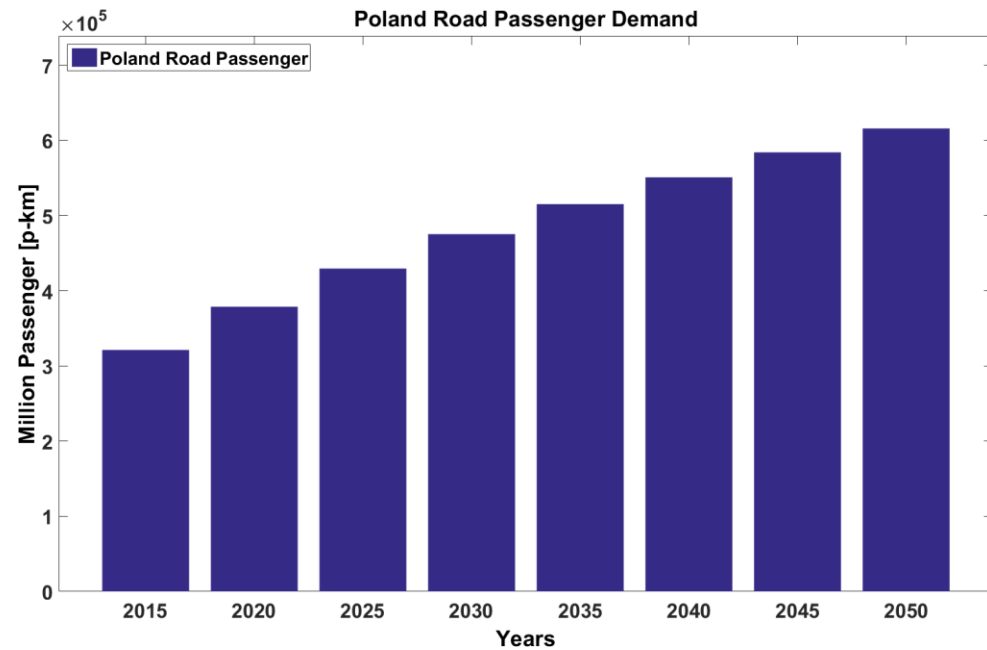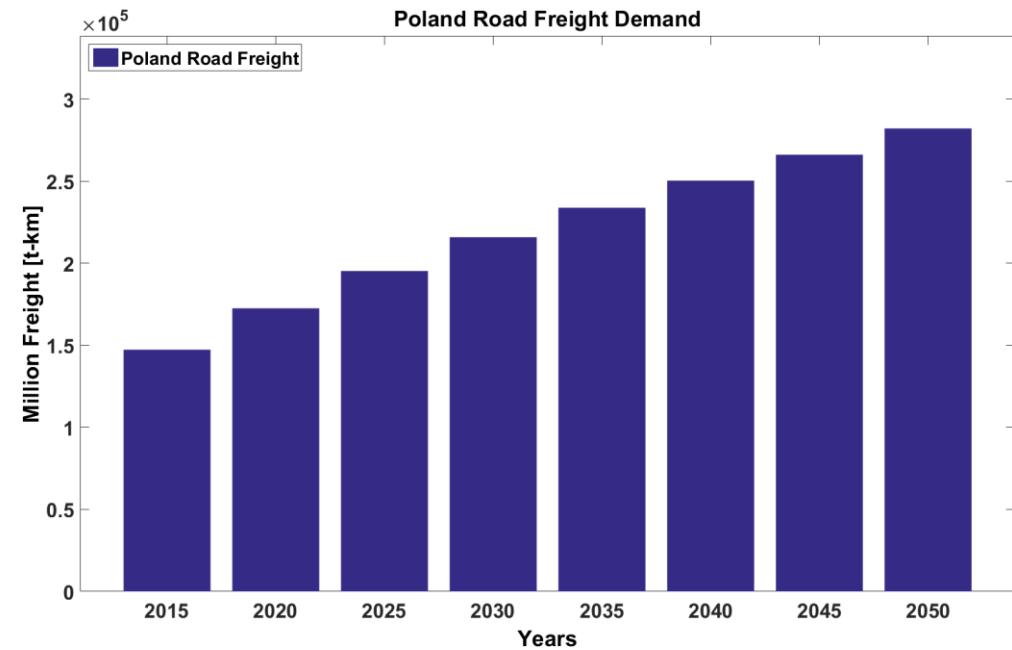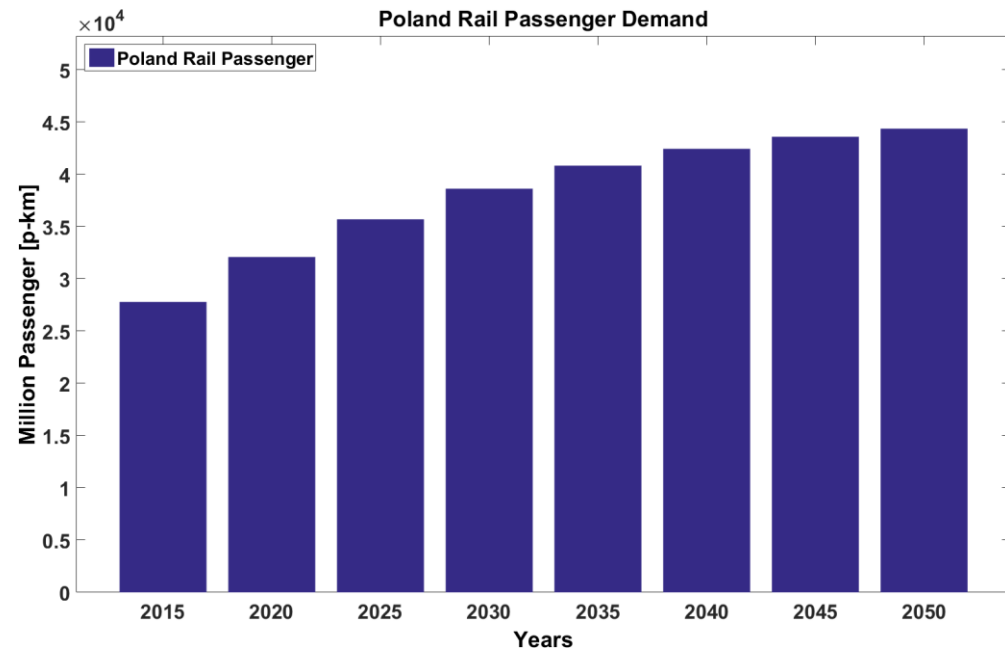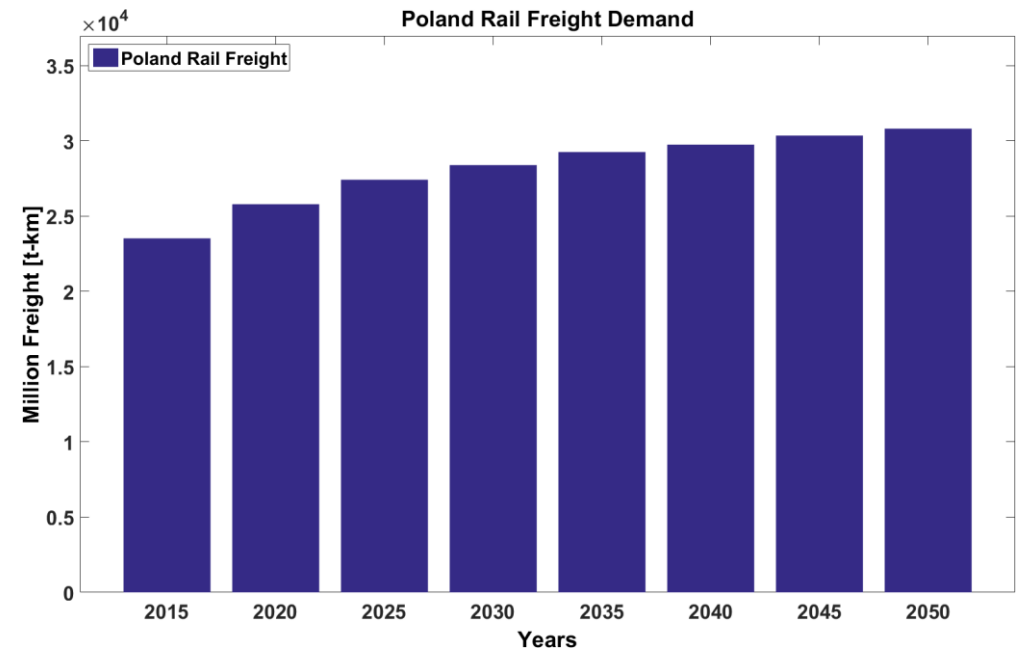

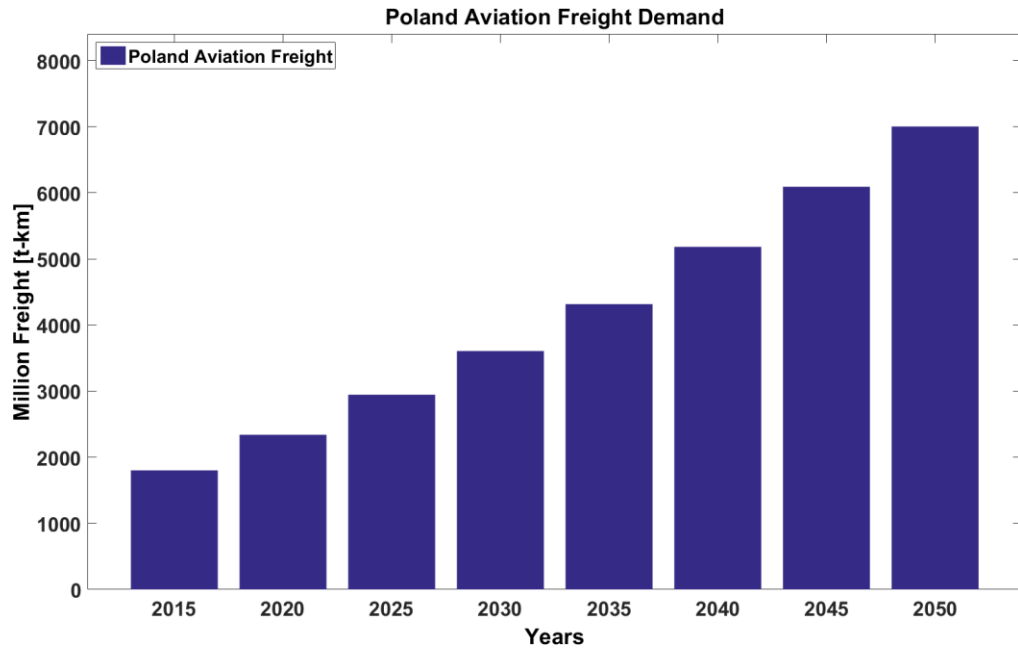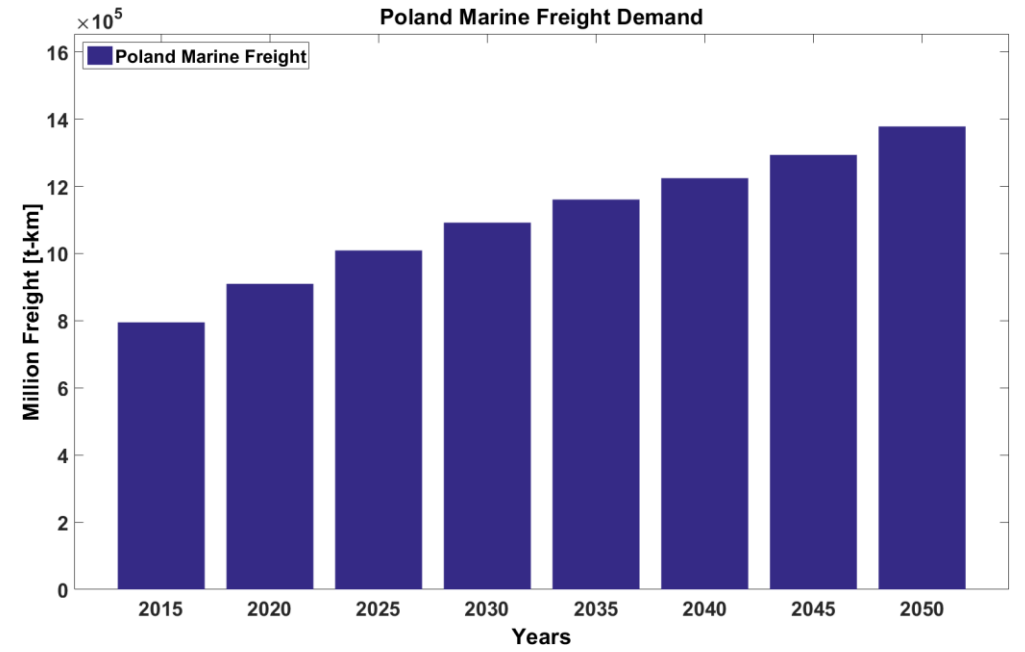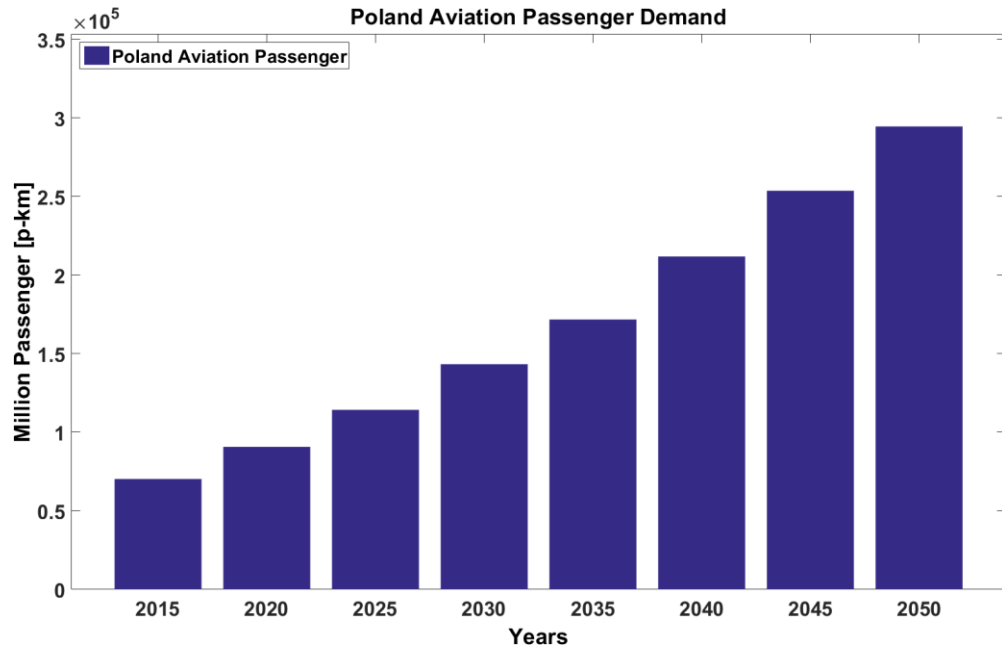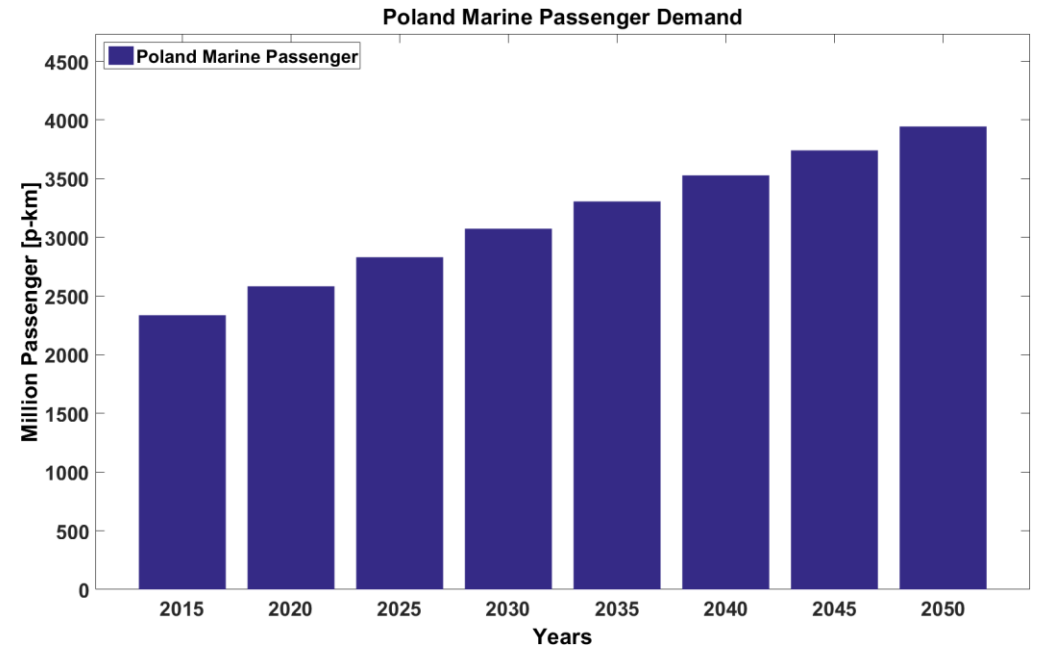

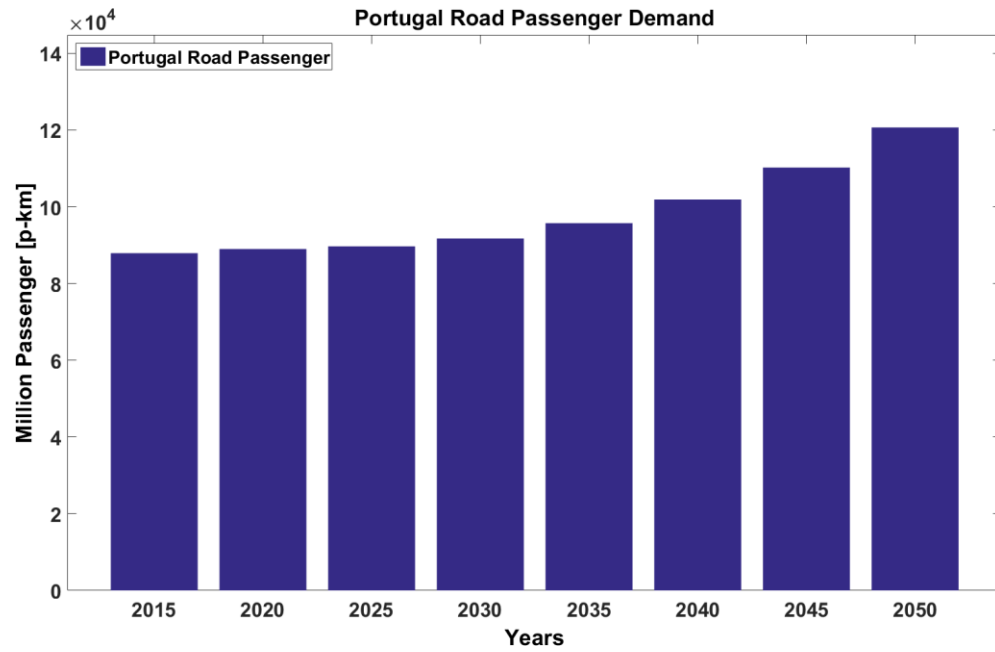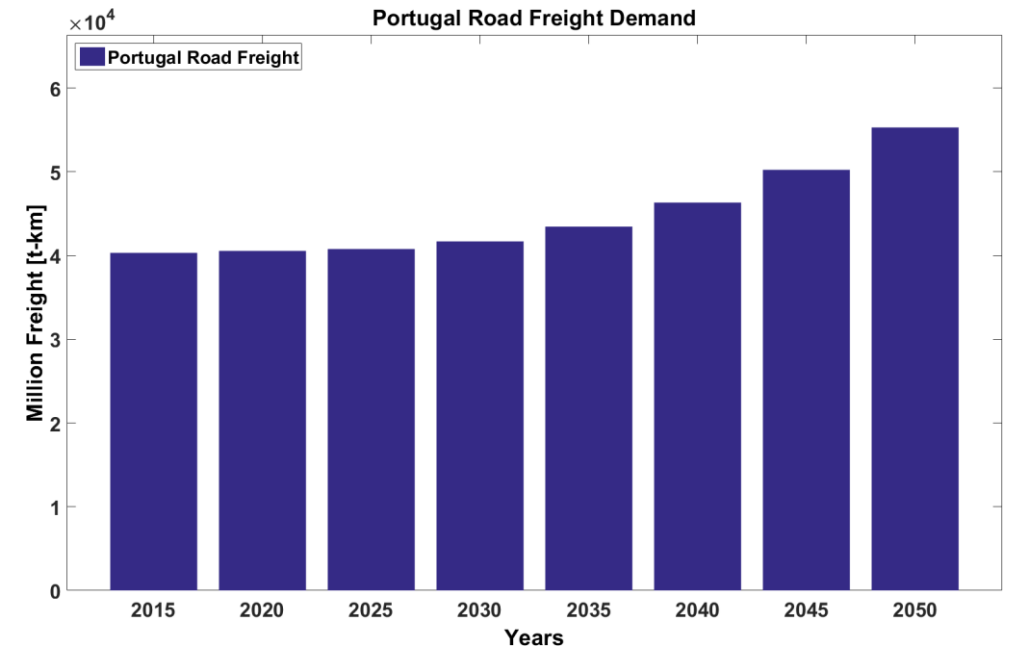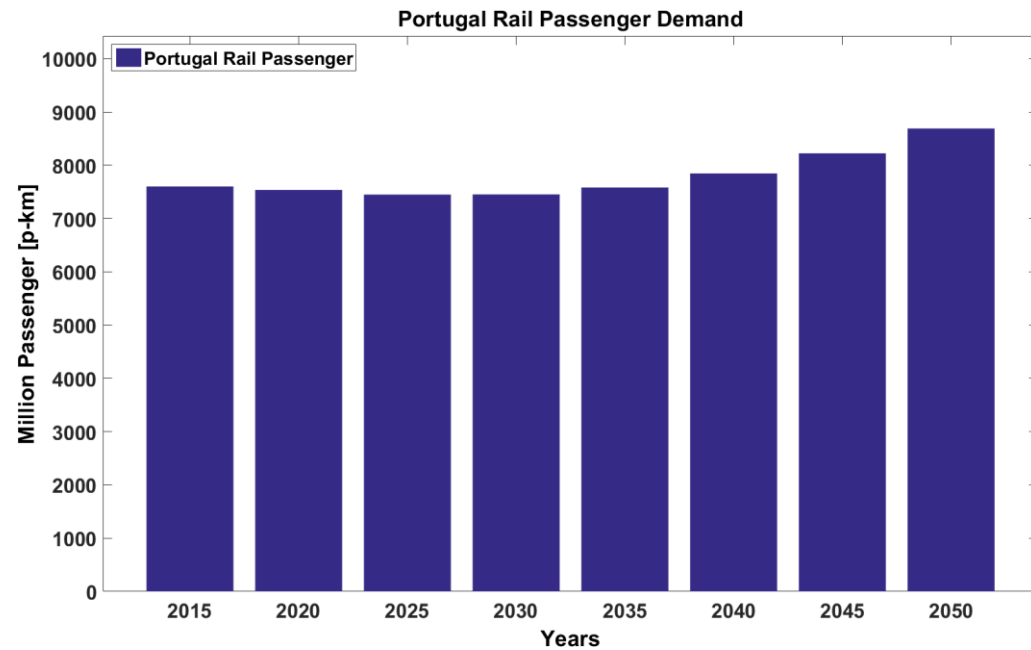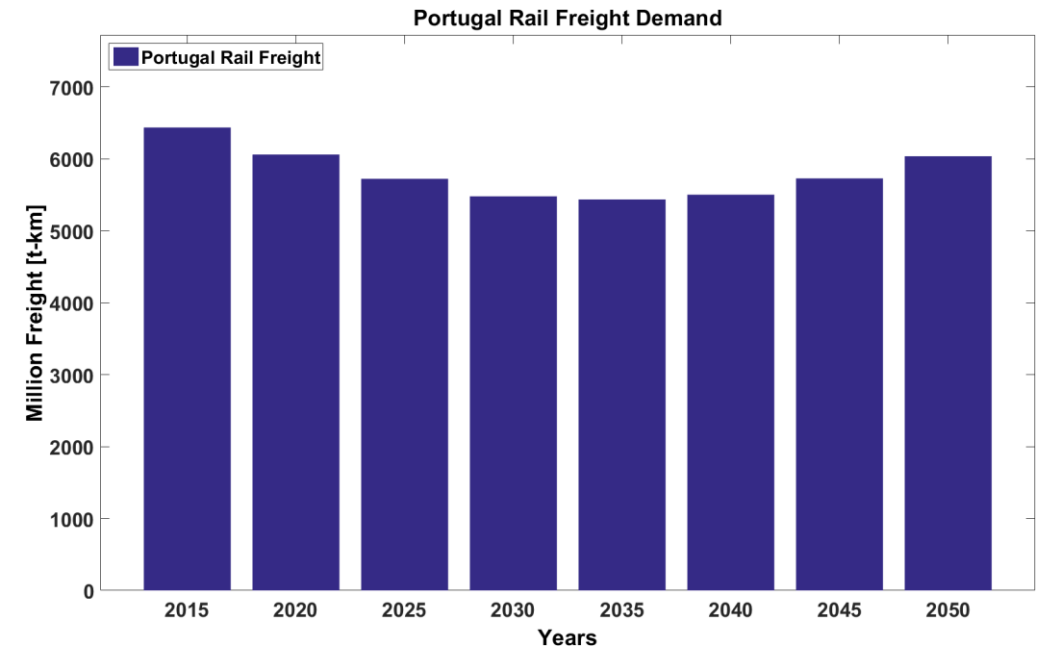

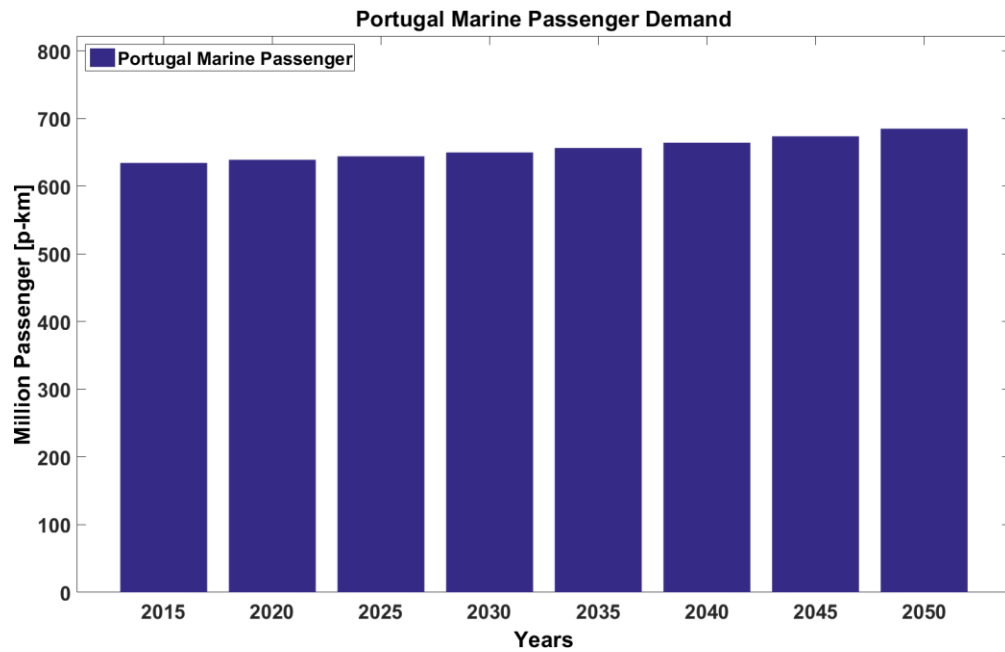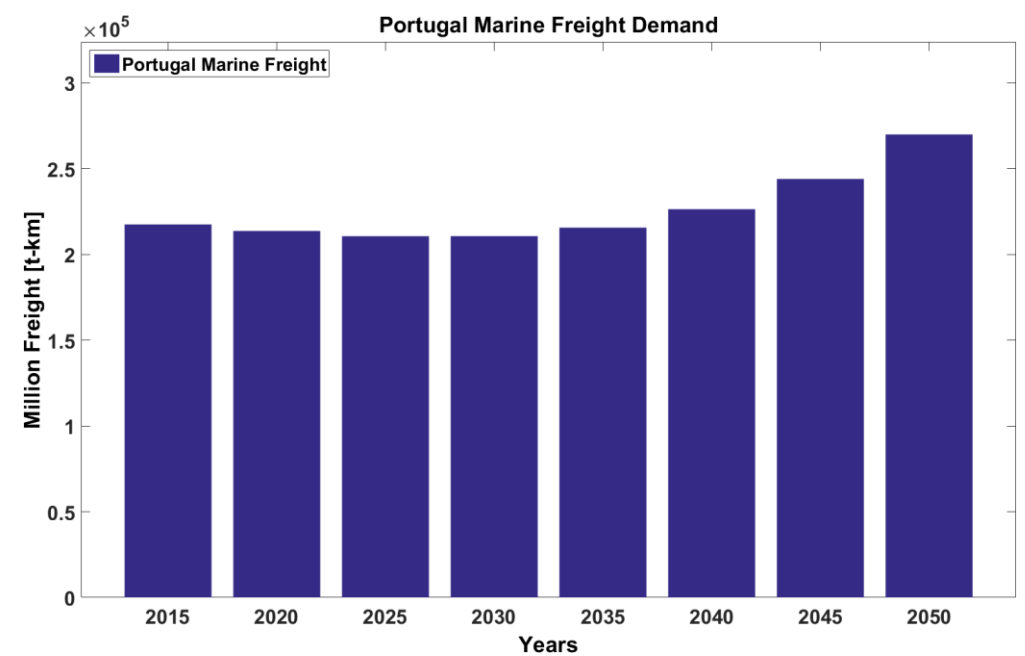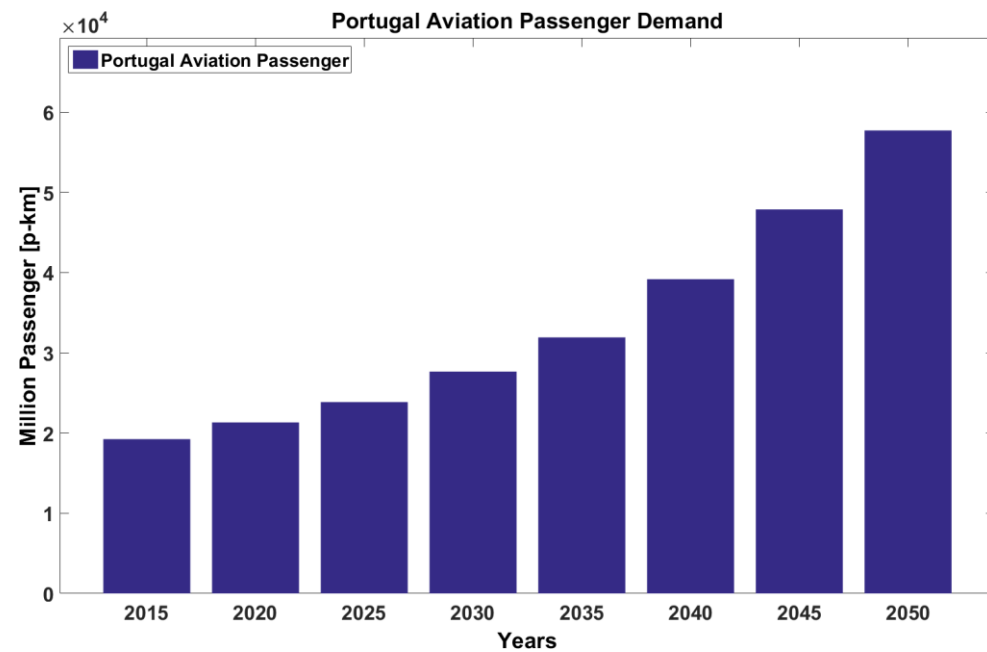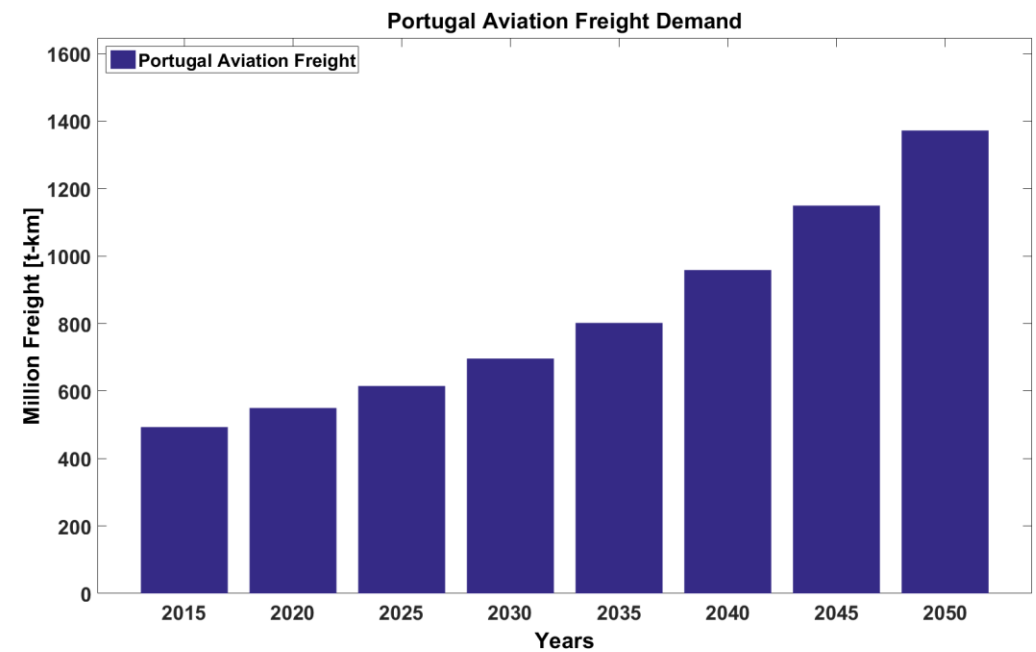

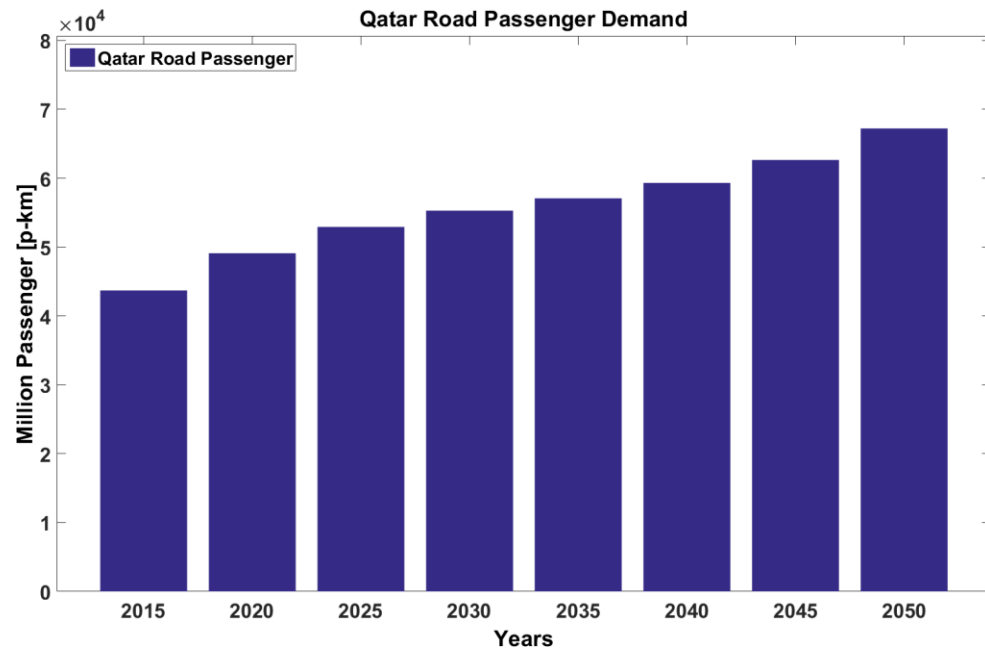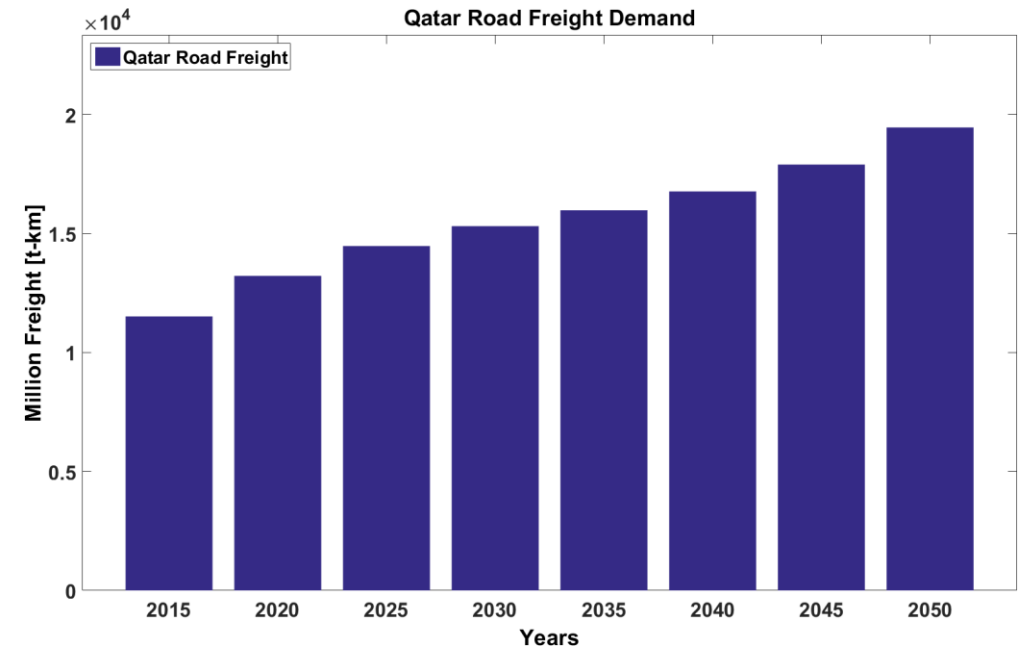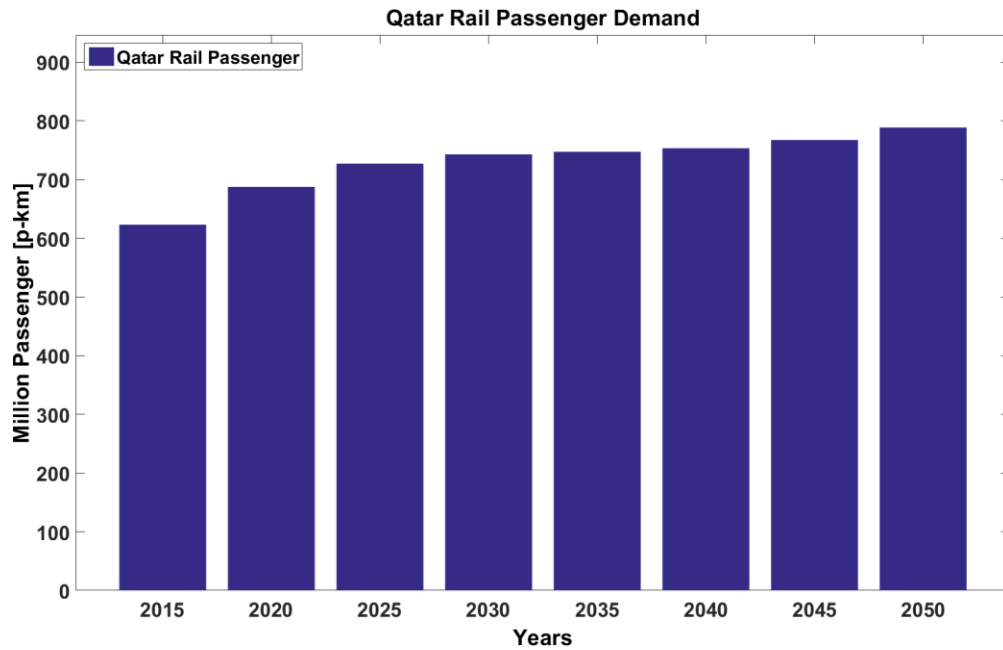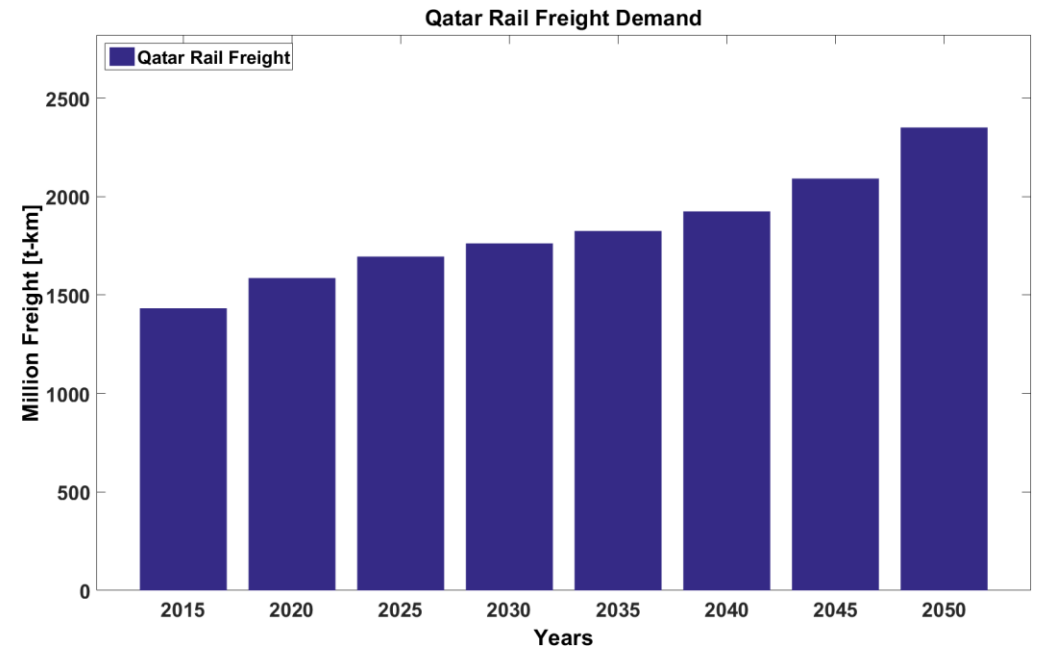

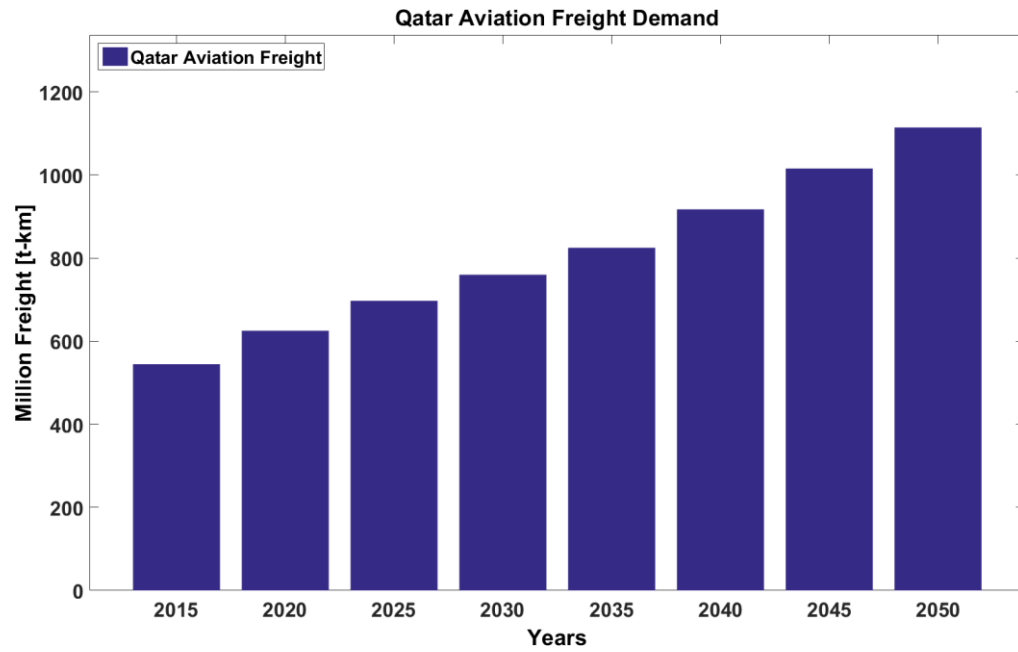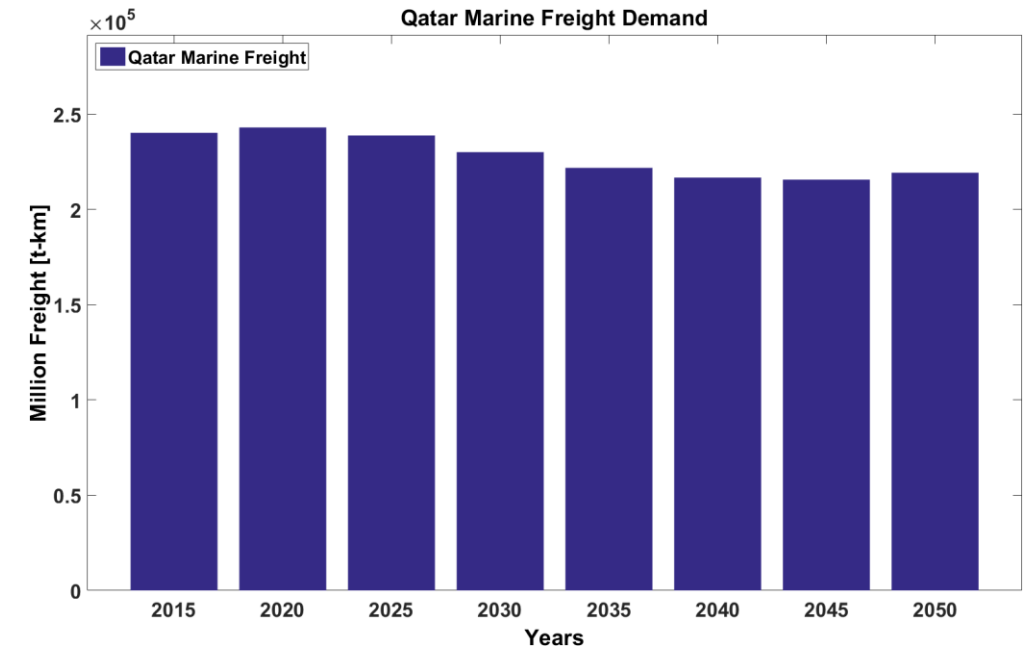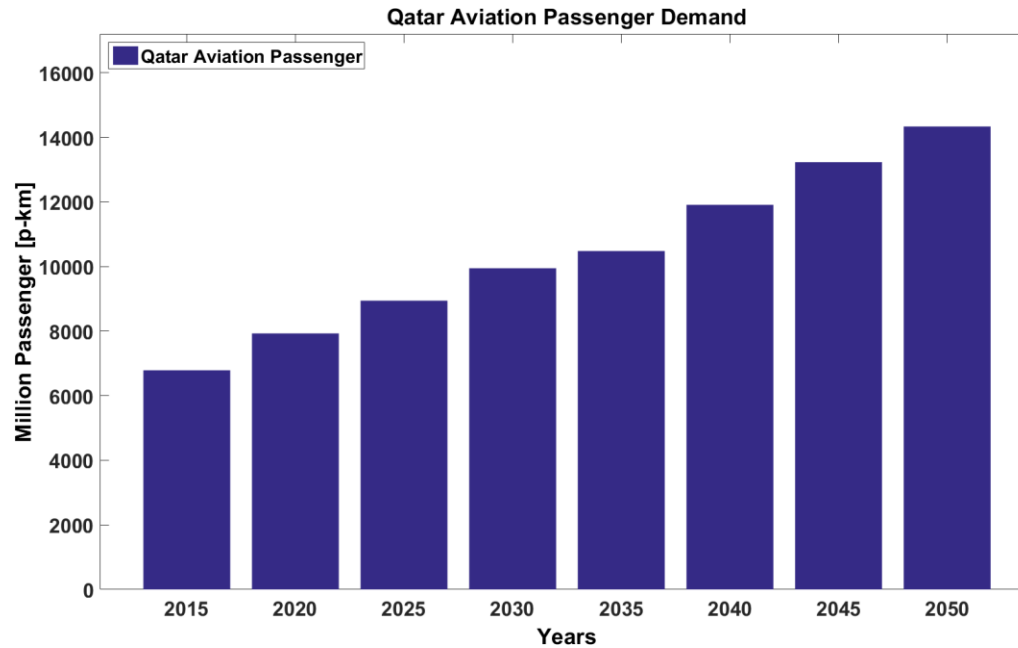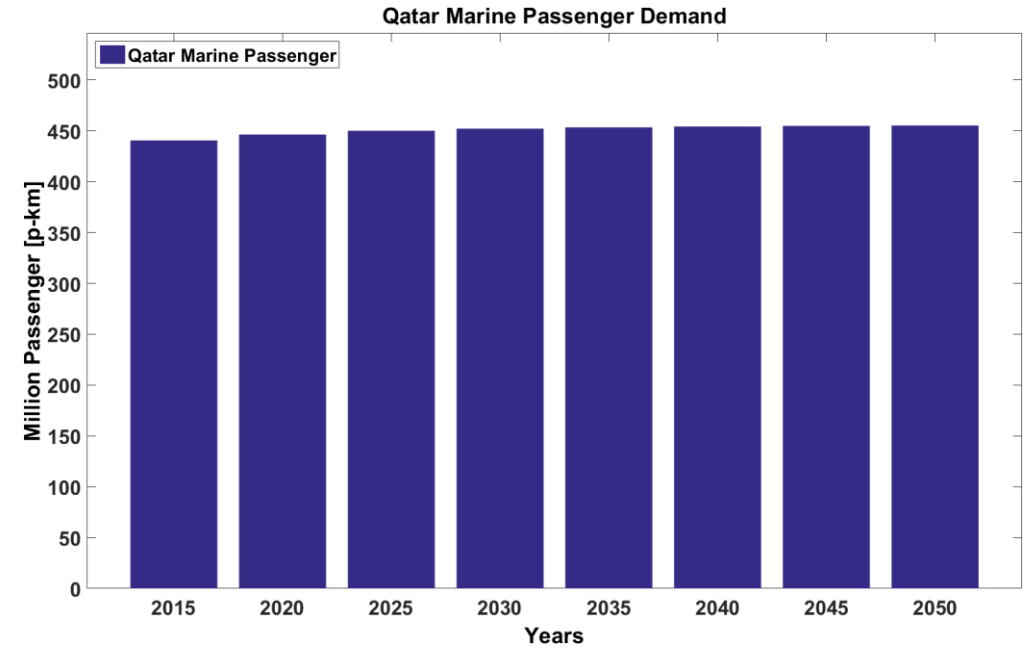

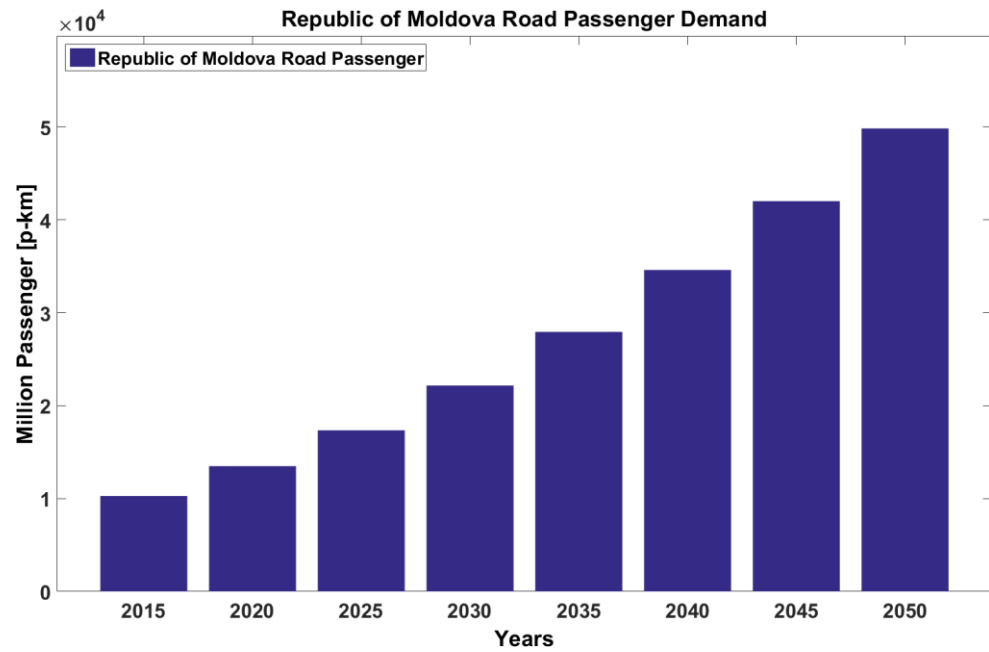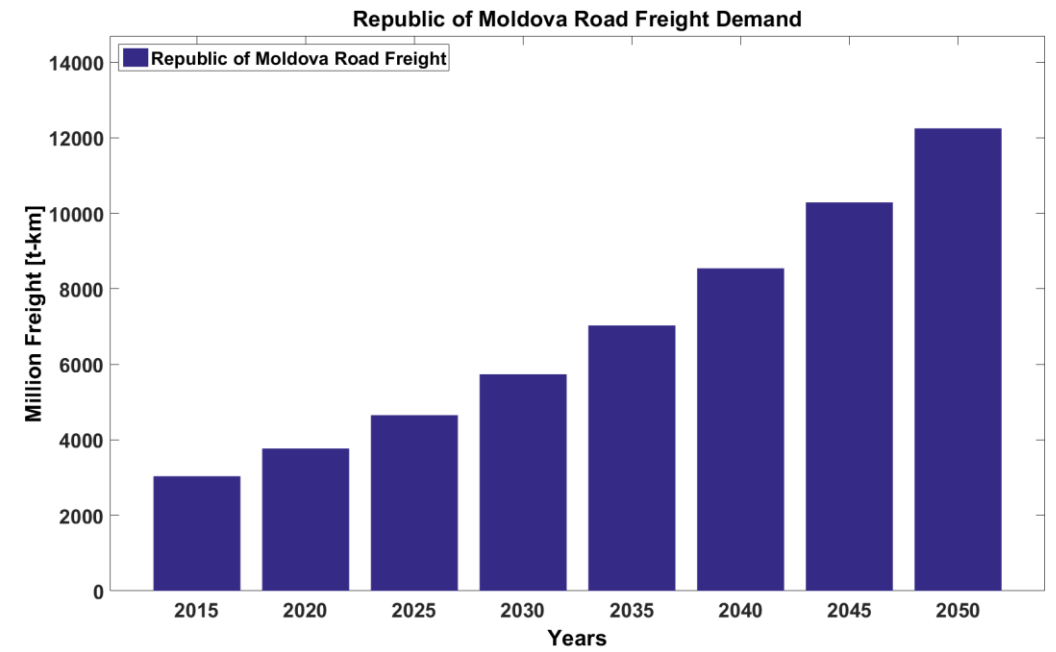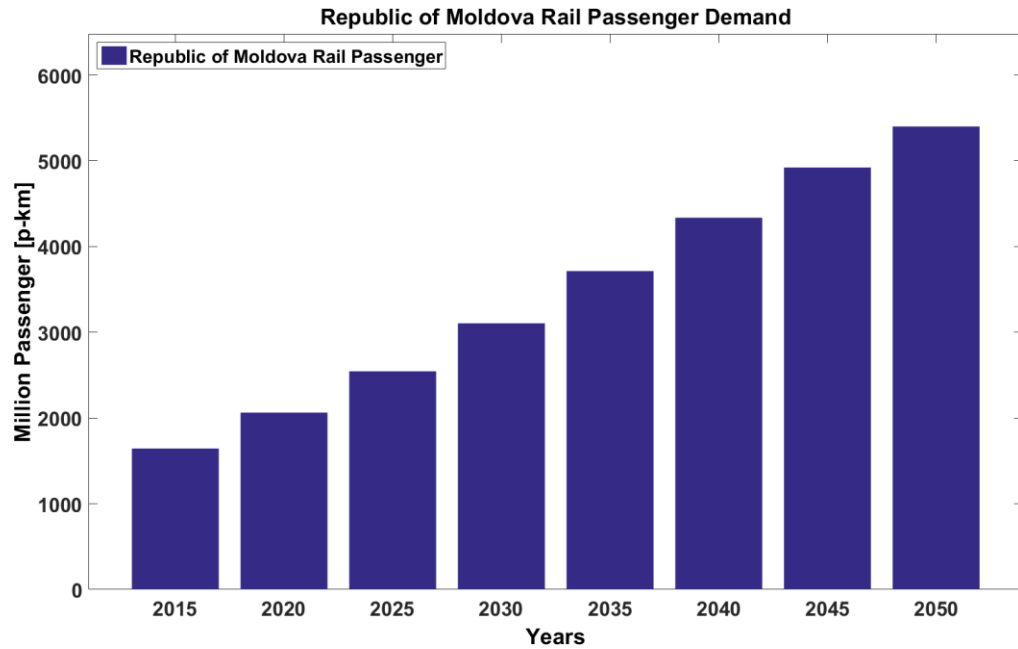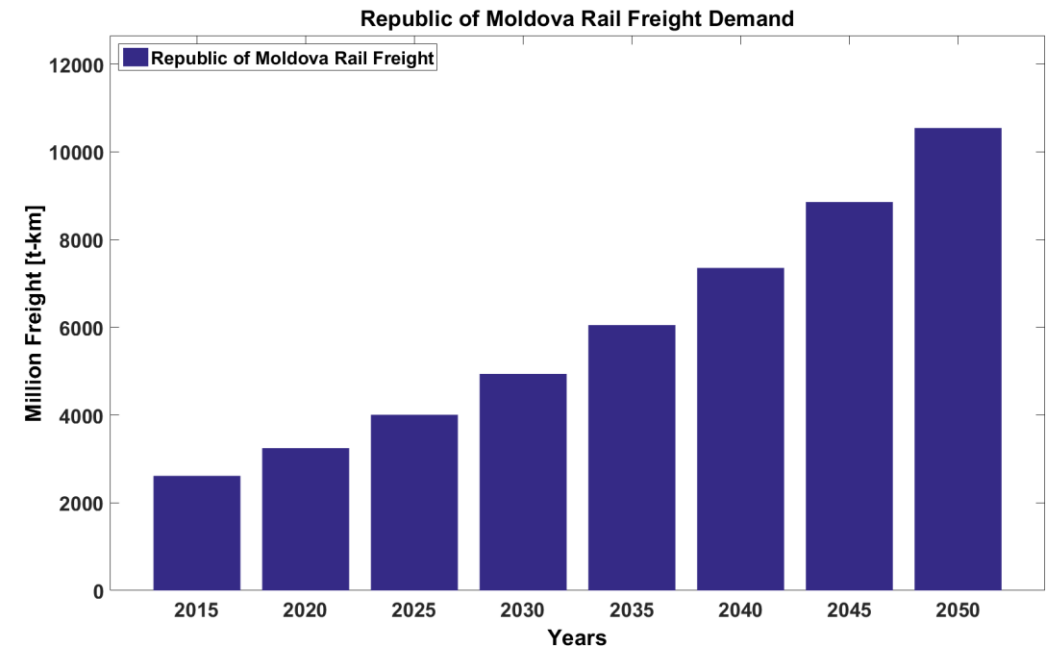

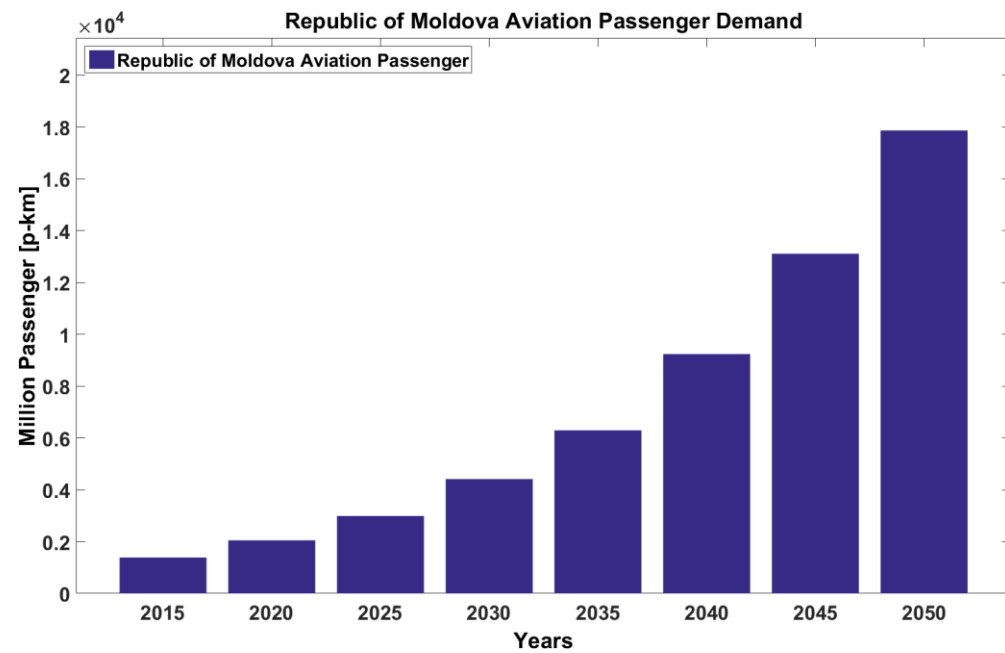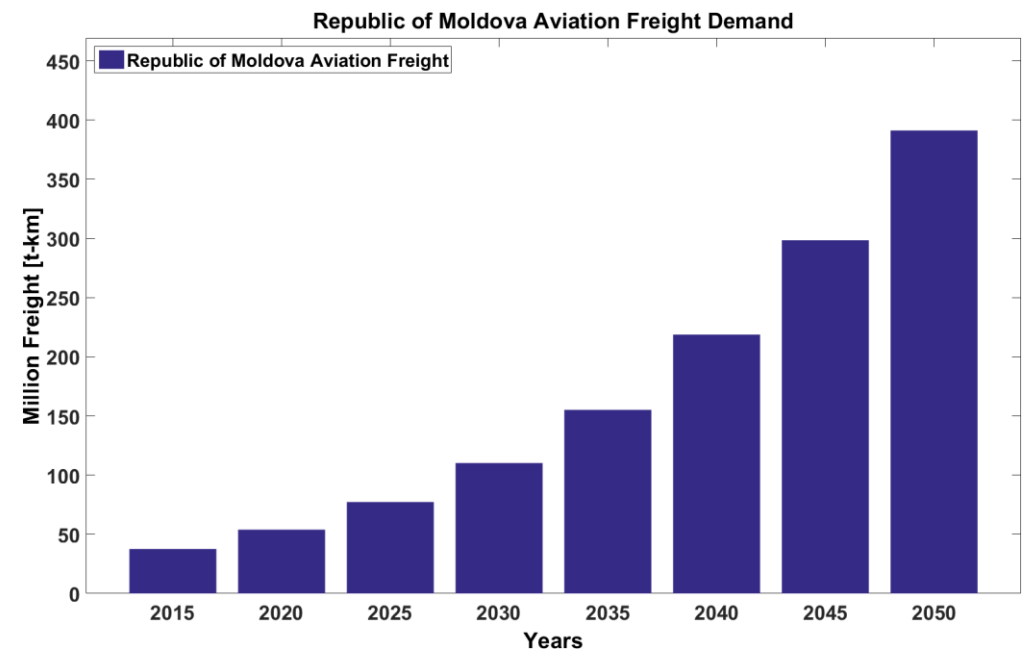

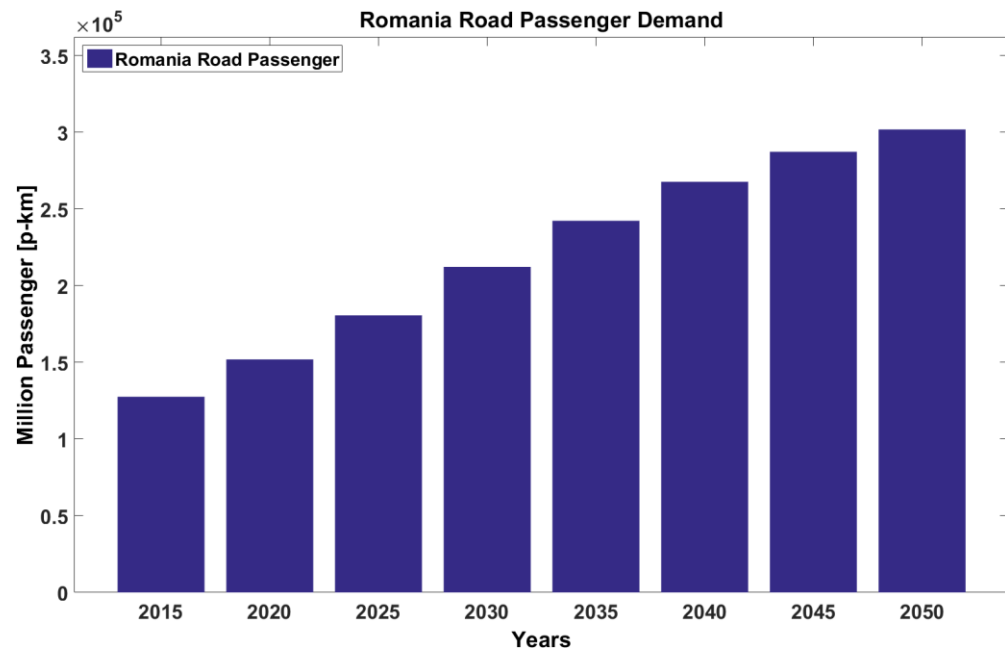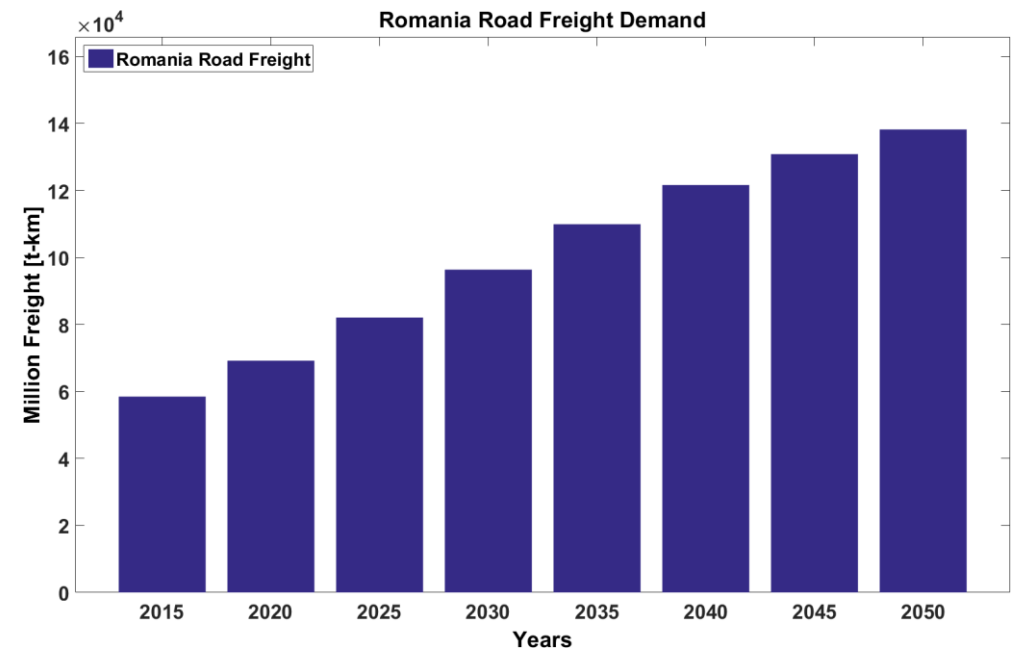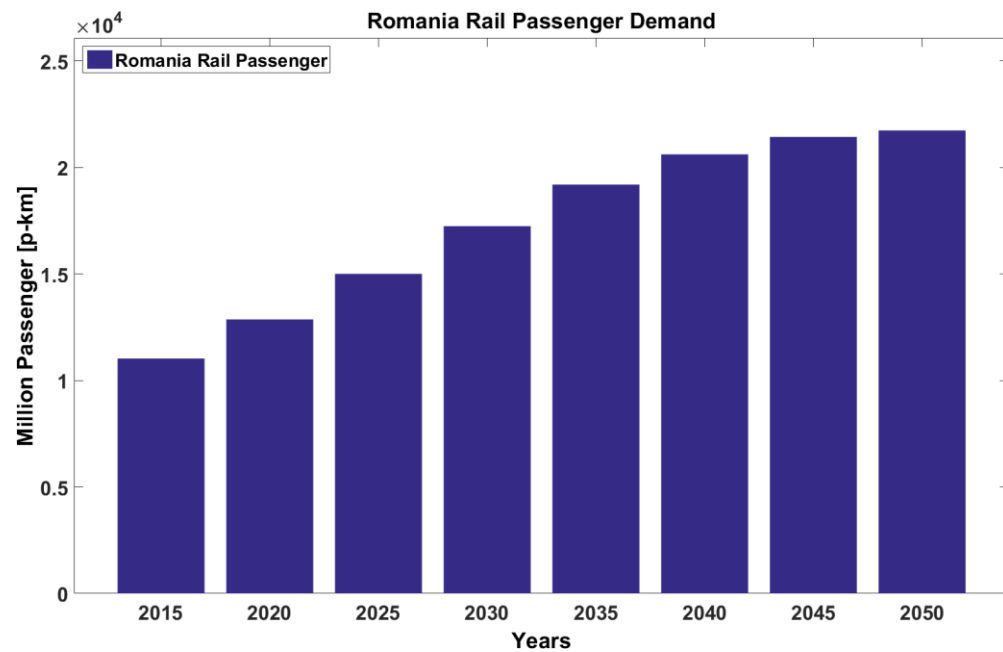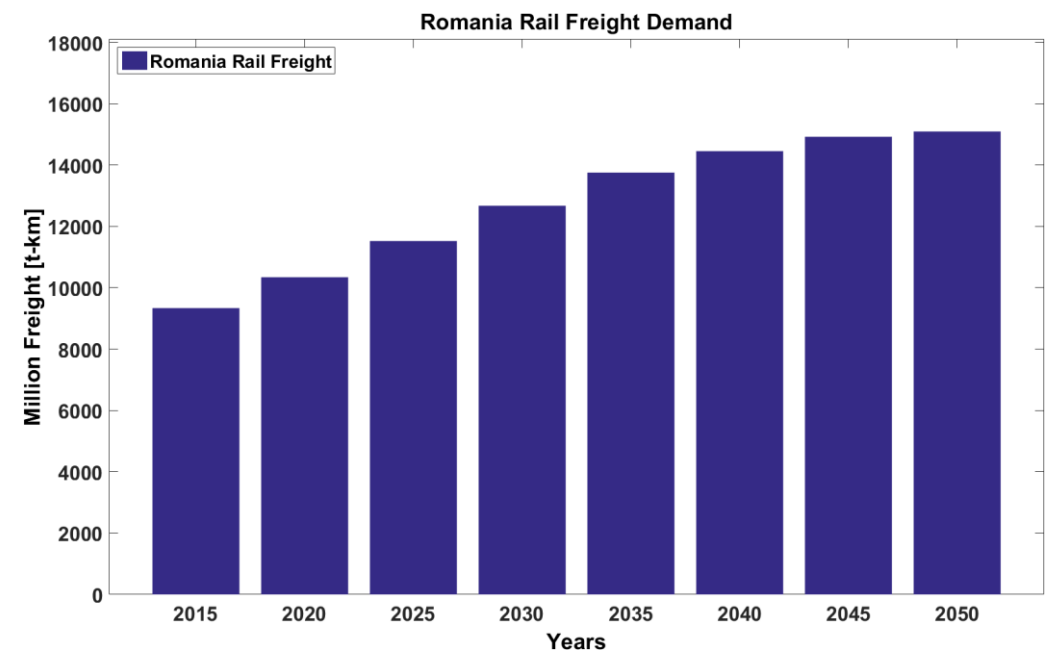

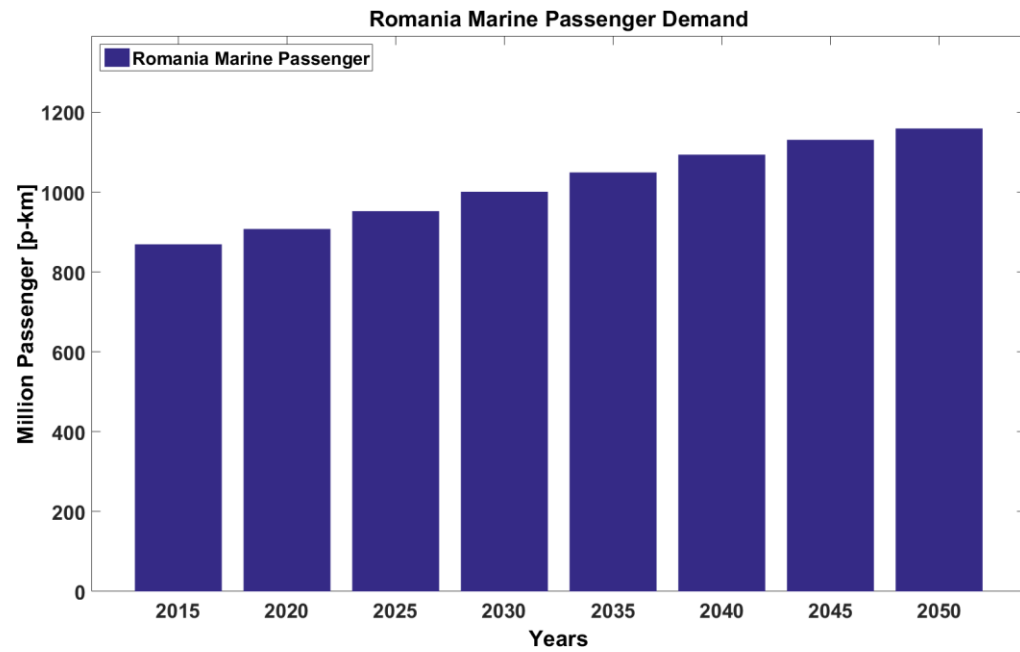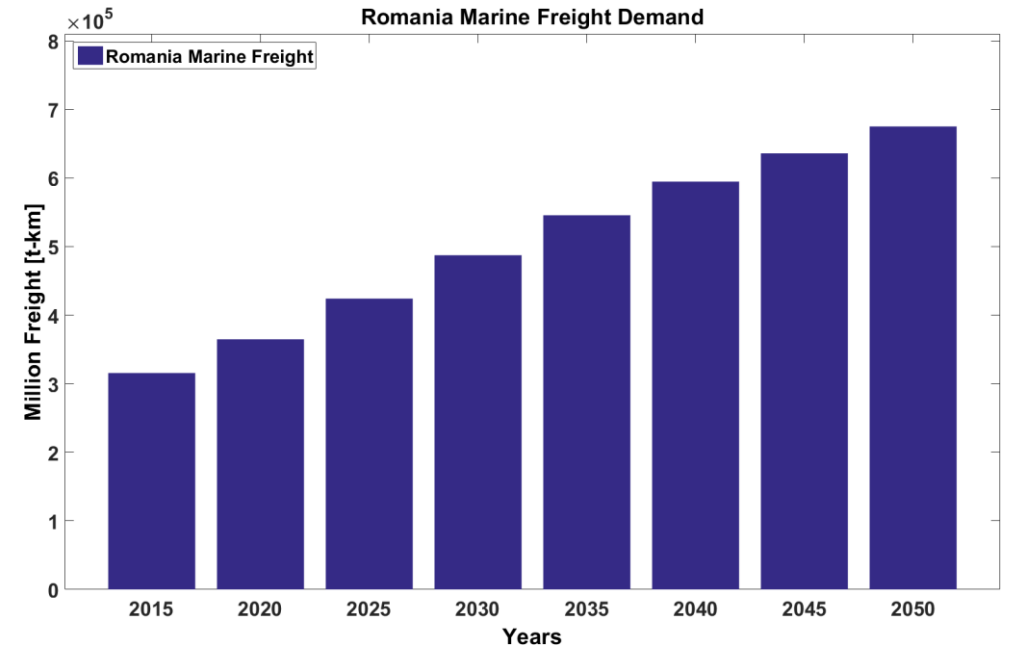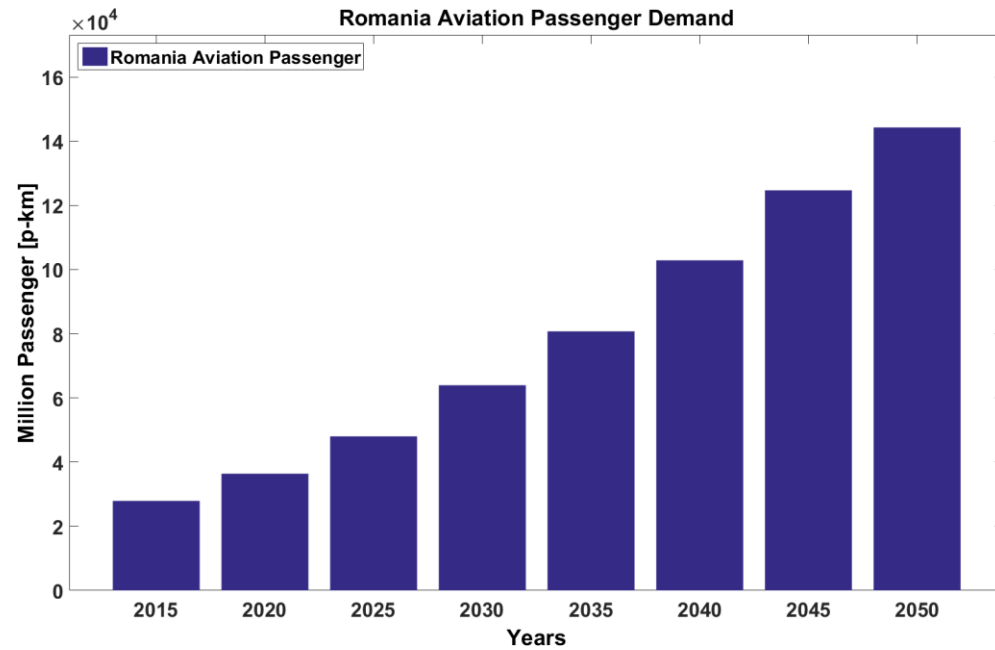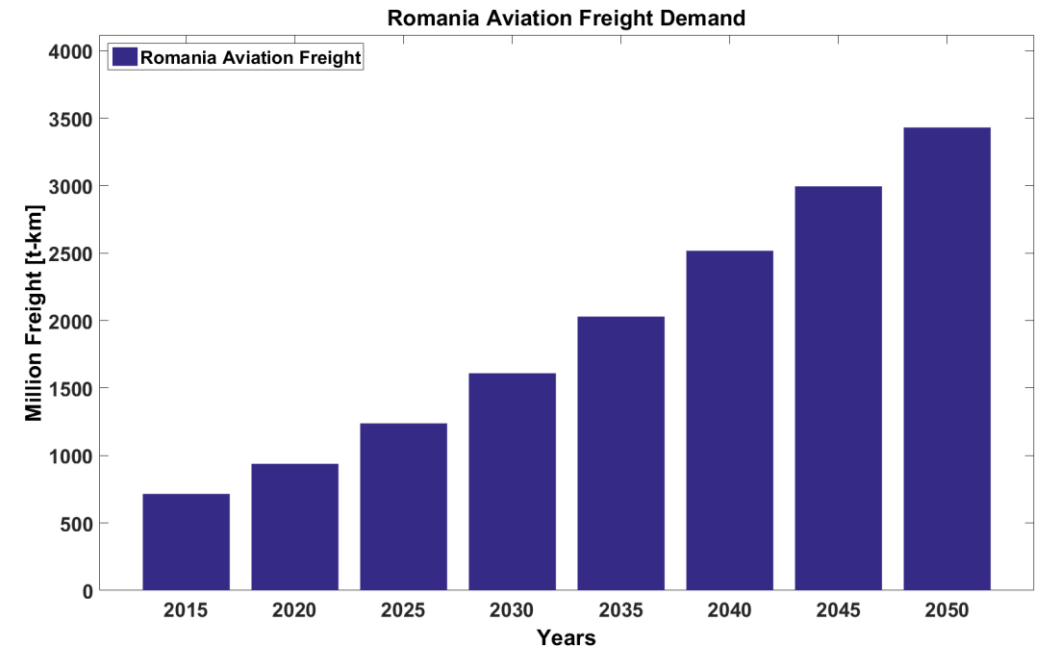

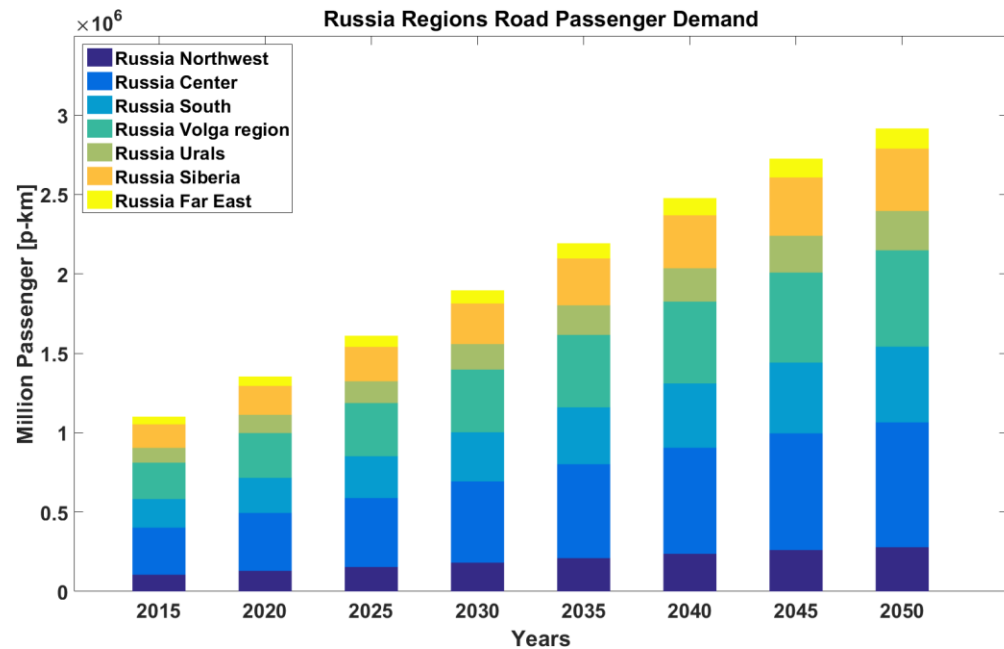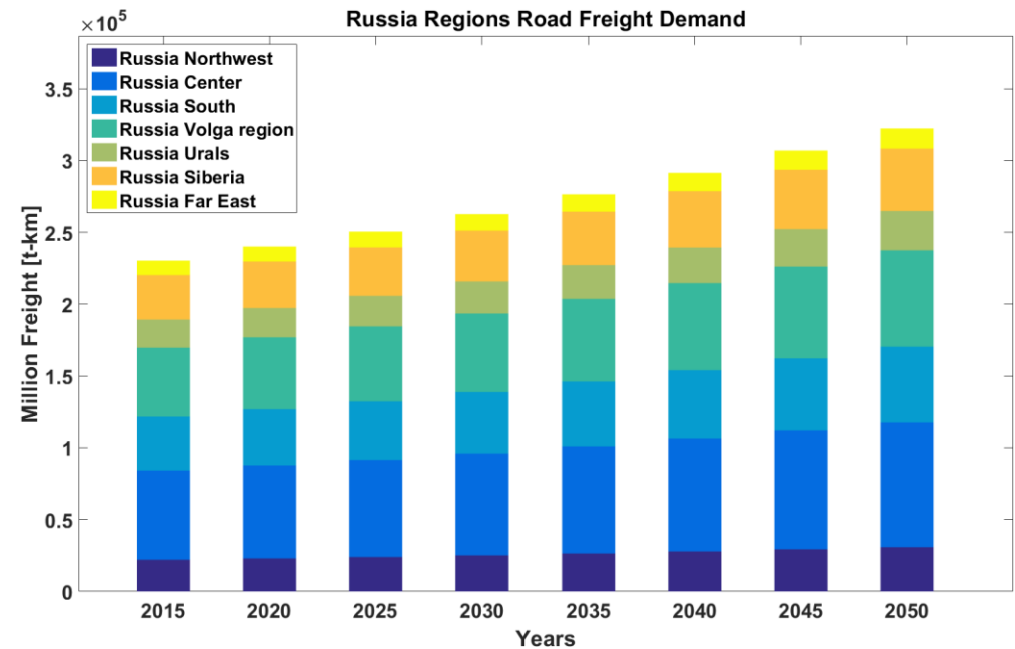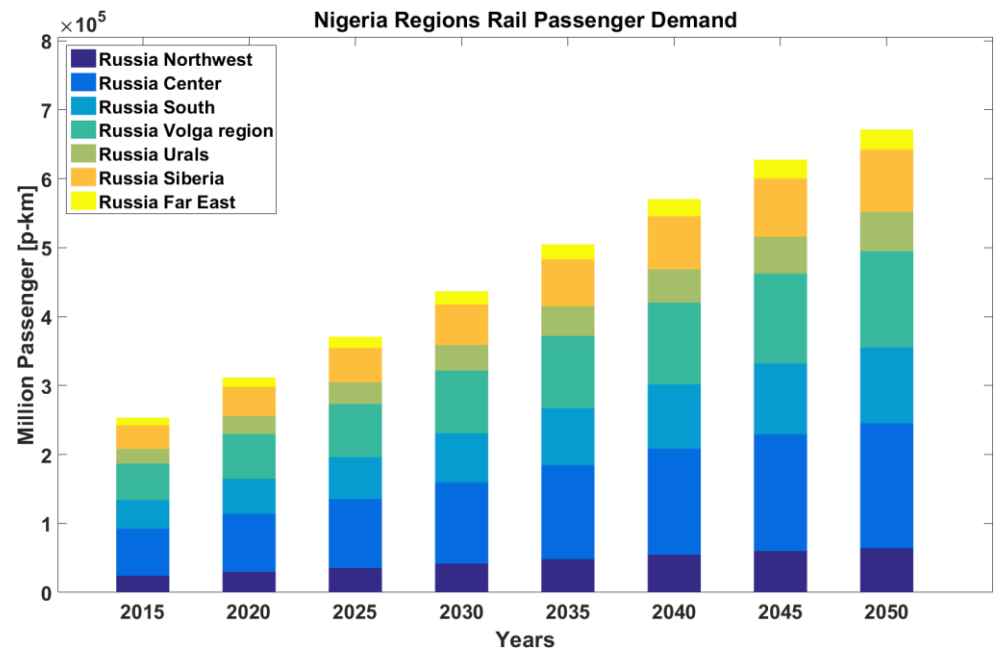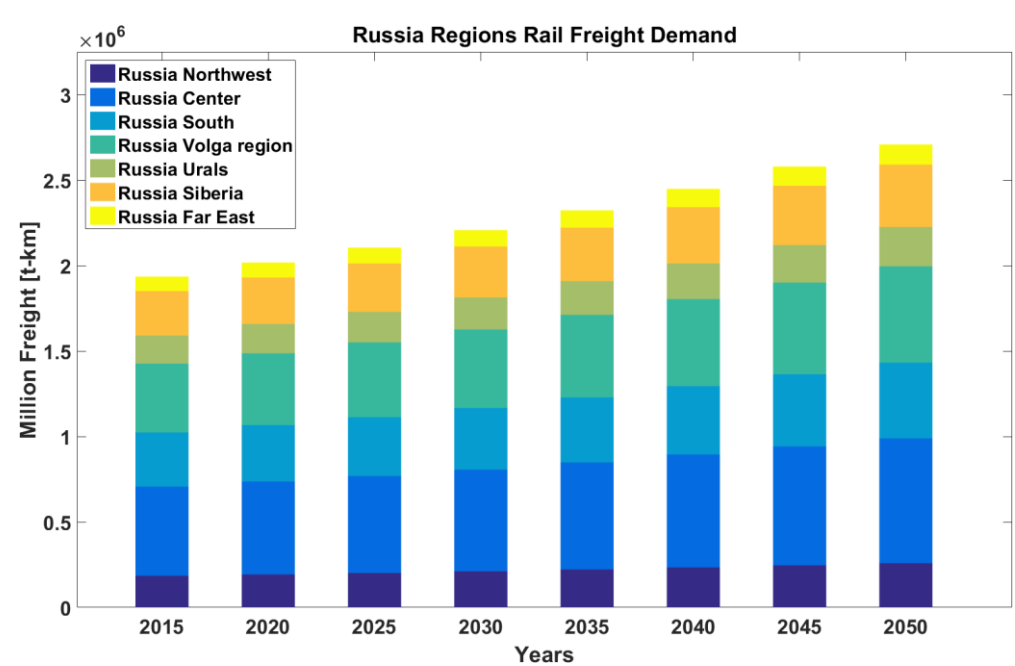

Russia Regions Marine Passenger Demand

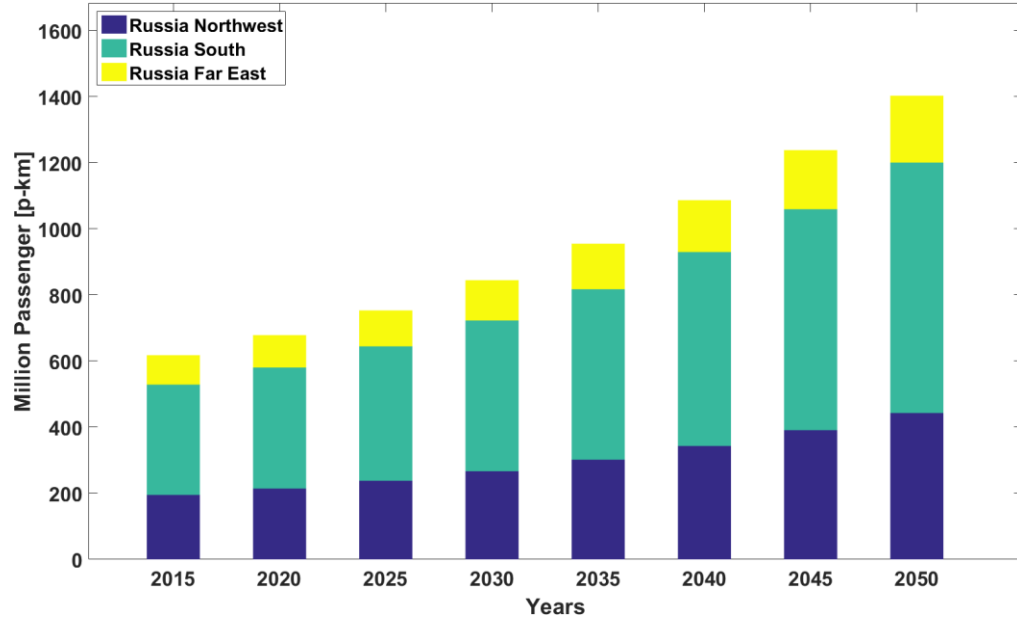

Russia Regions Marine Freight Demand

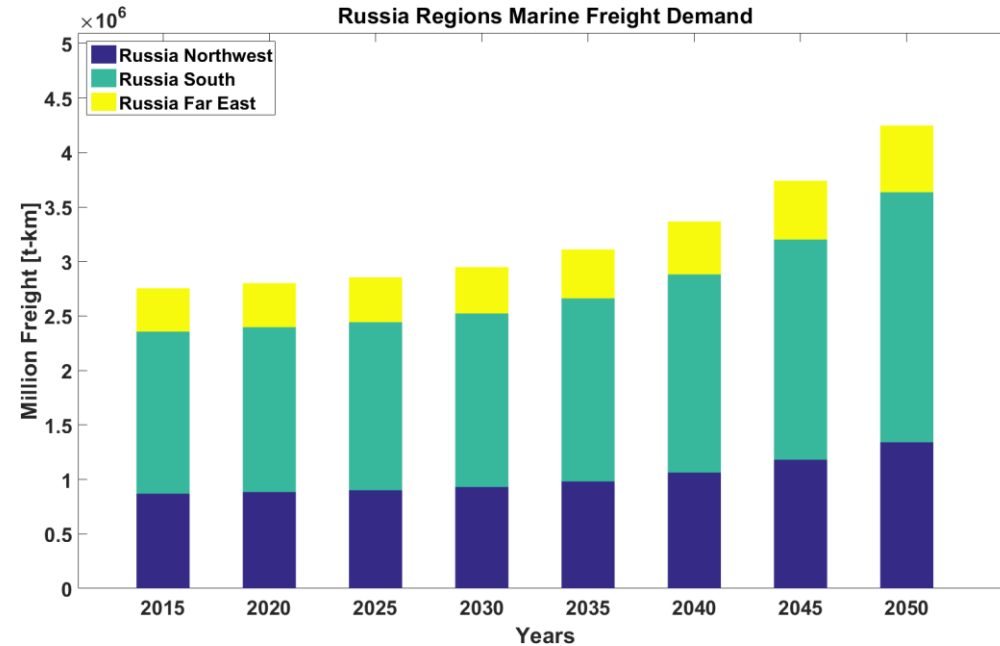

Russia Regions Aviation Passenger Demand

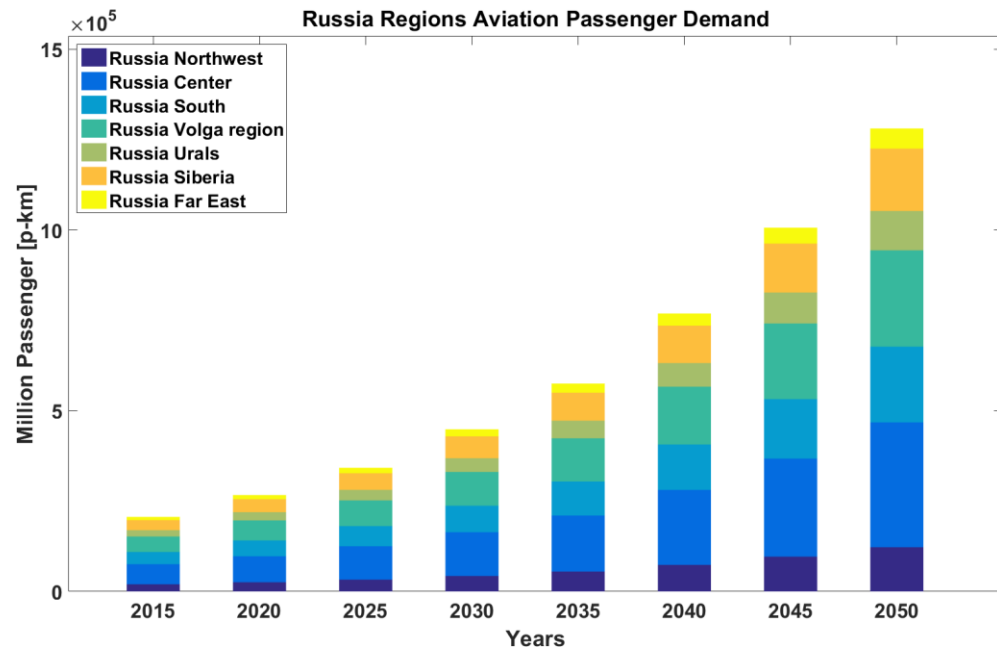

Russia Regions Aviation Freight Demand

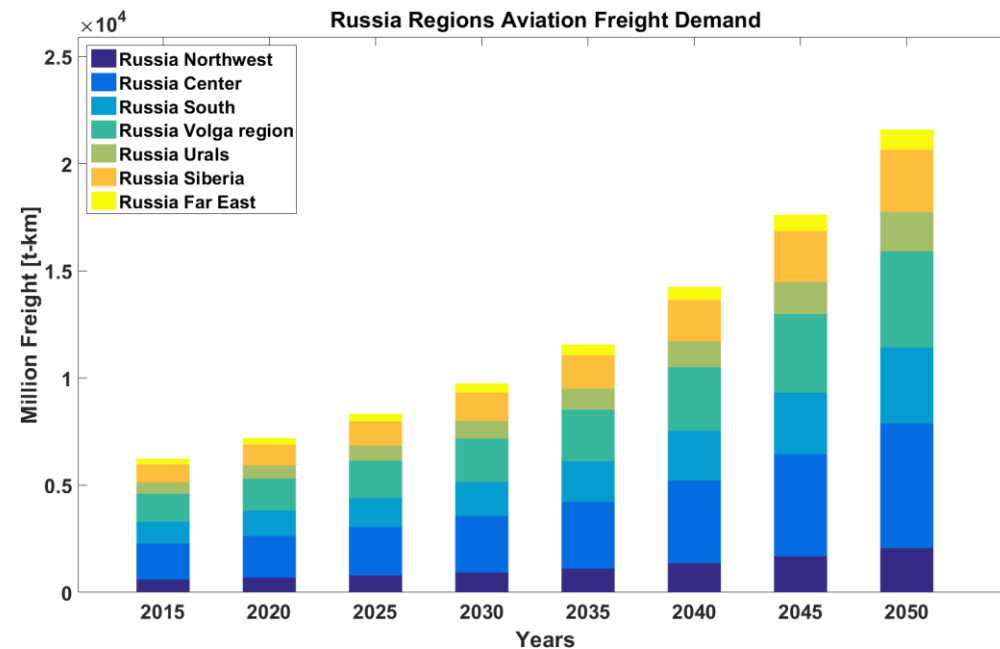

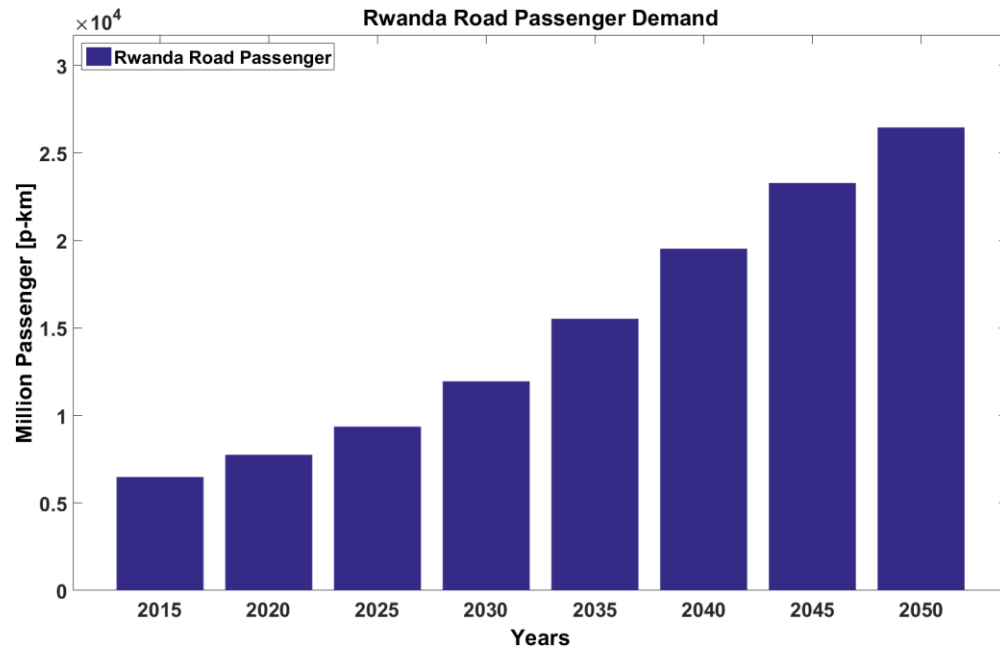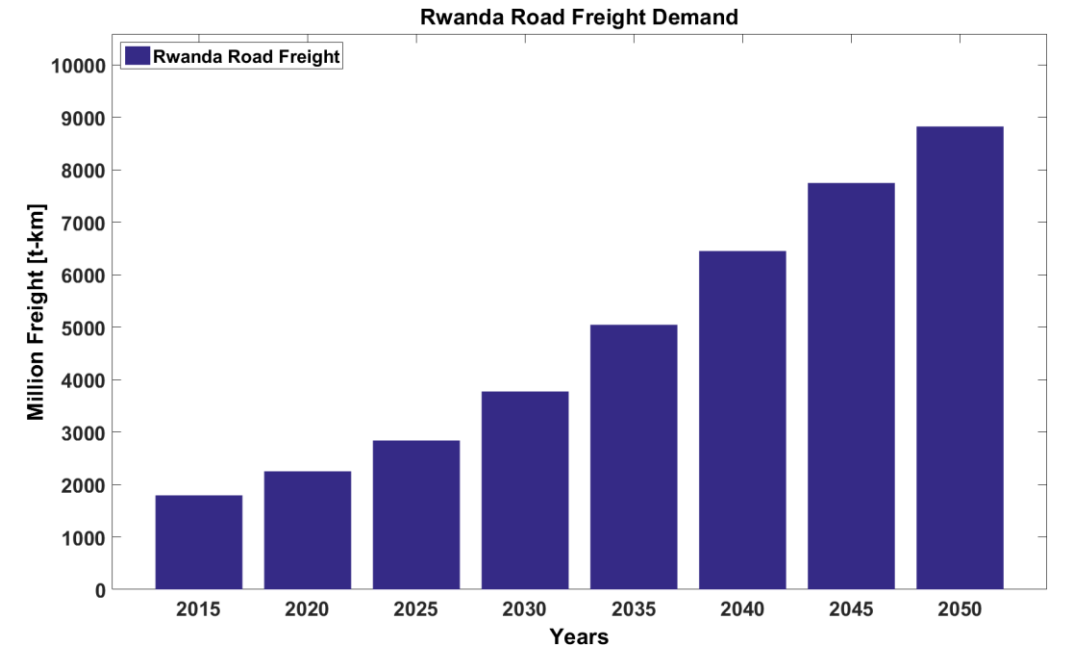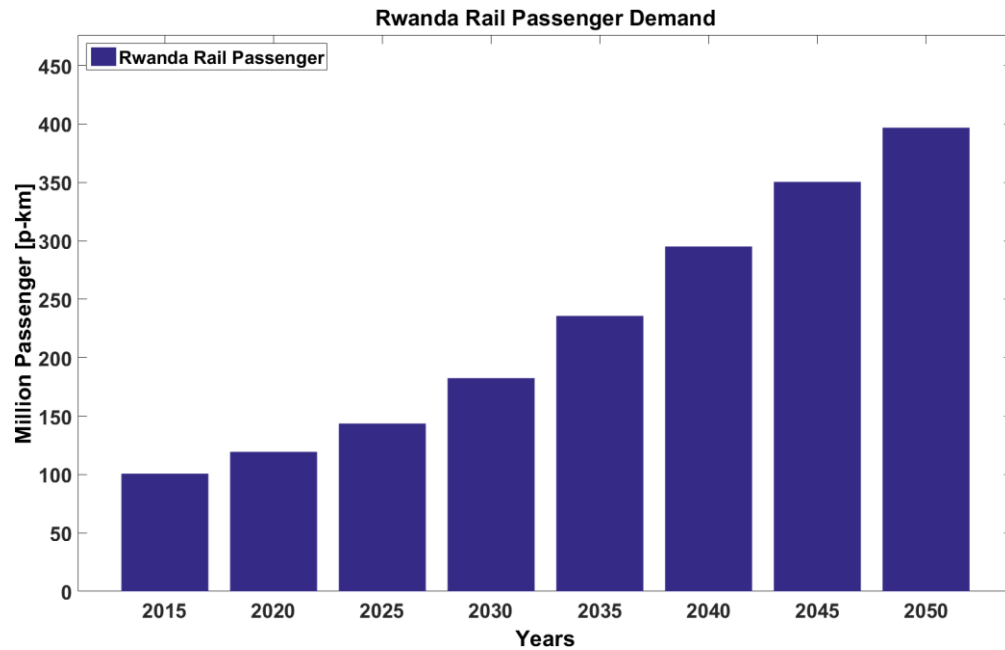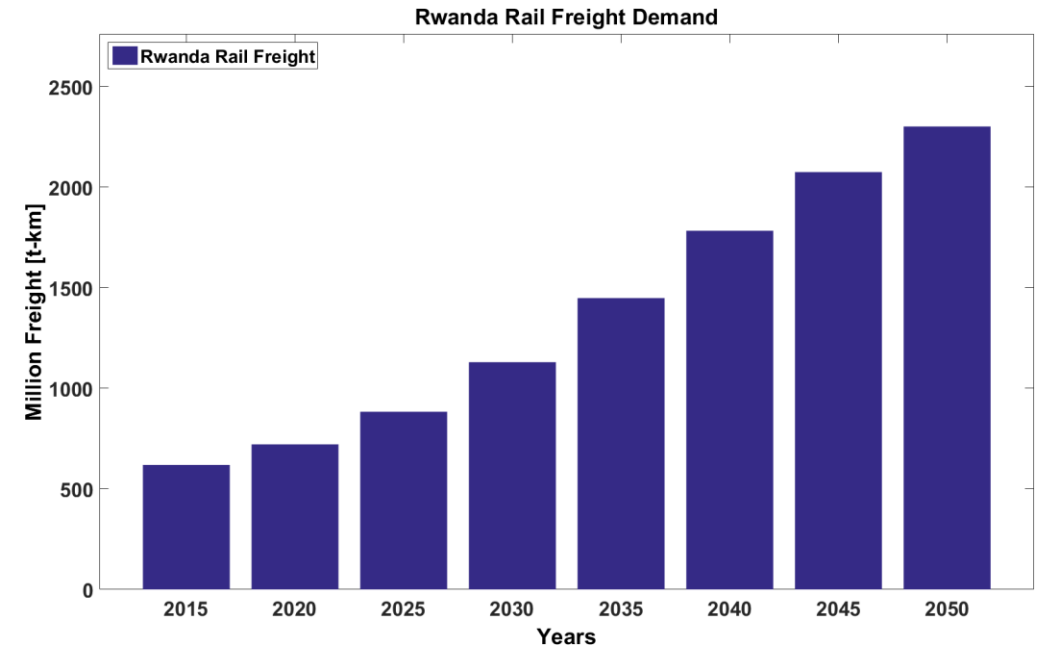

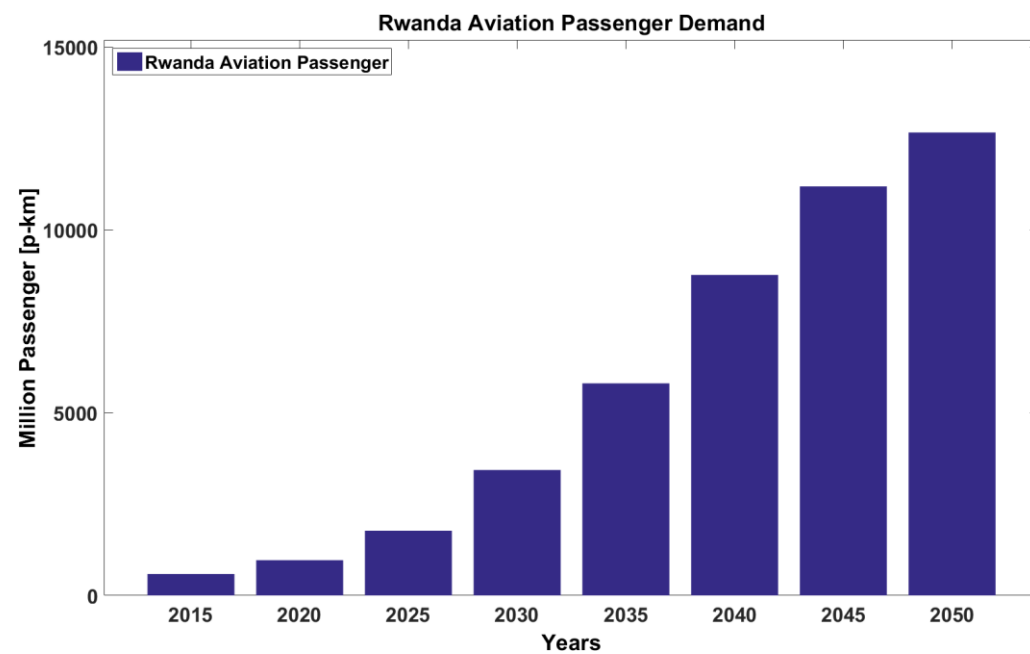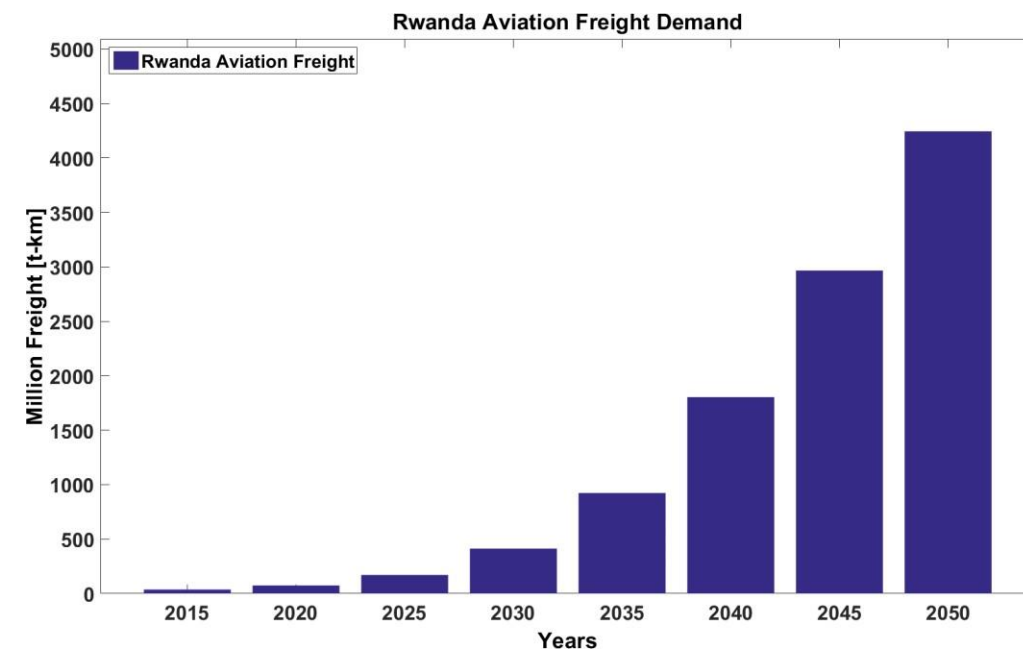

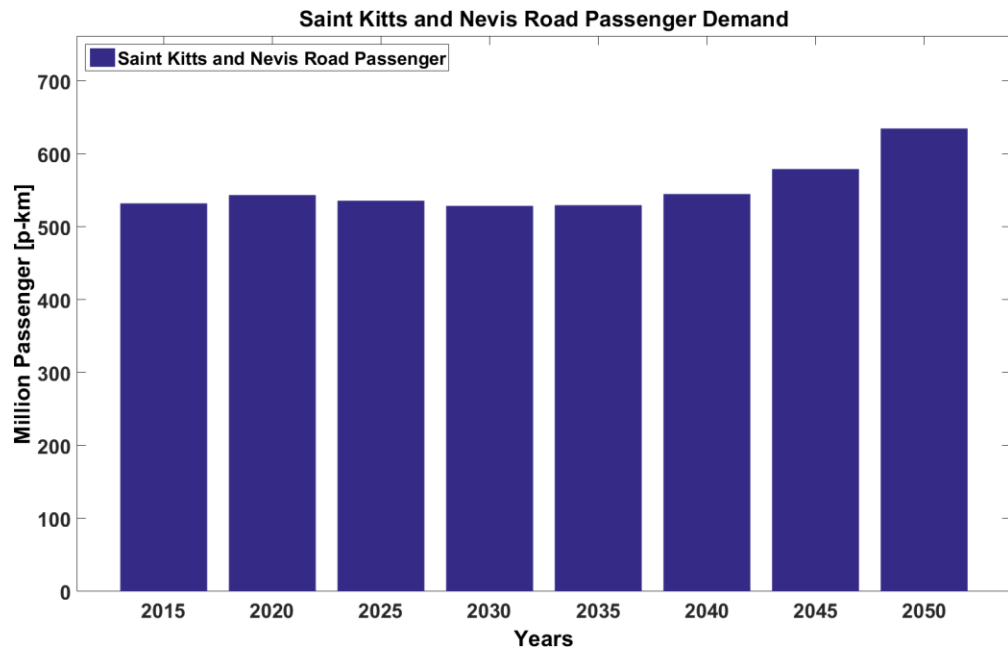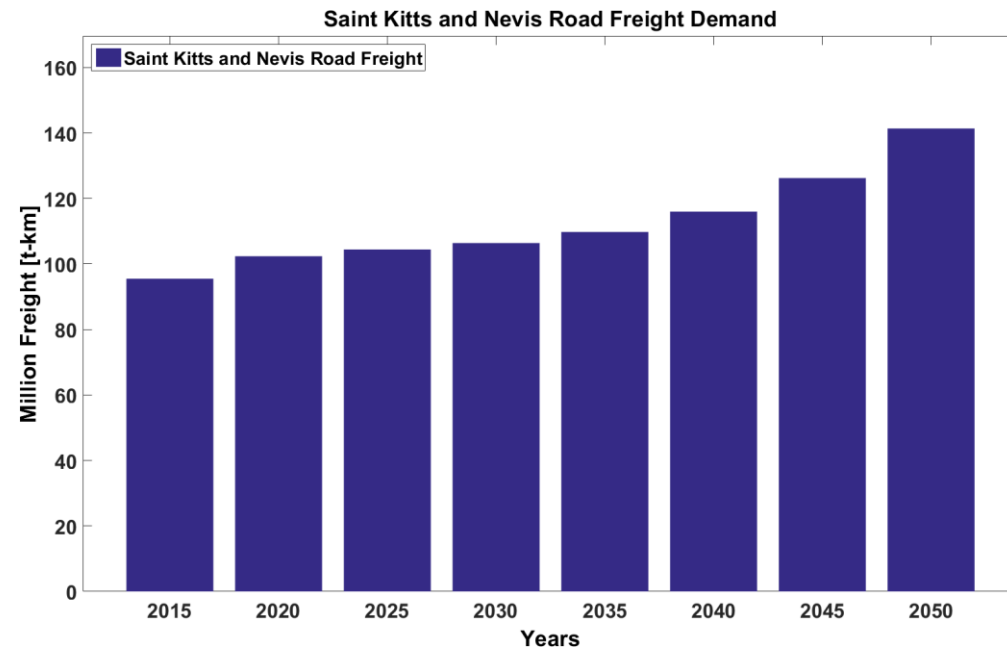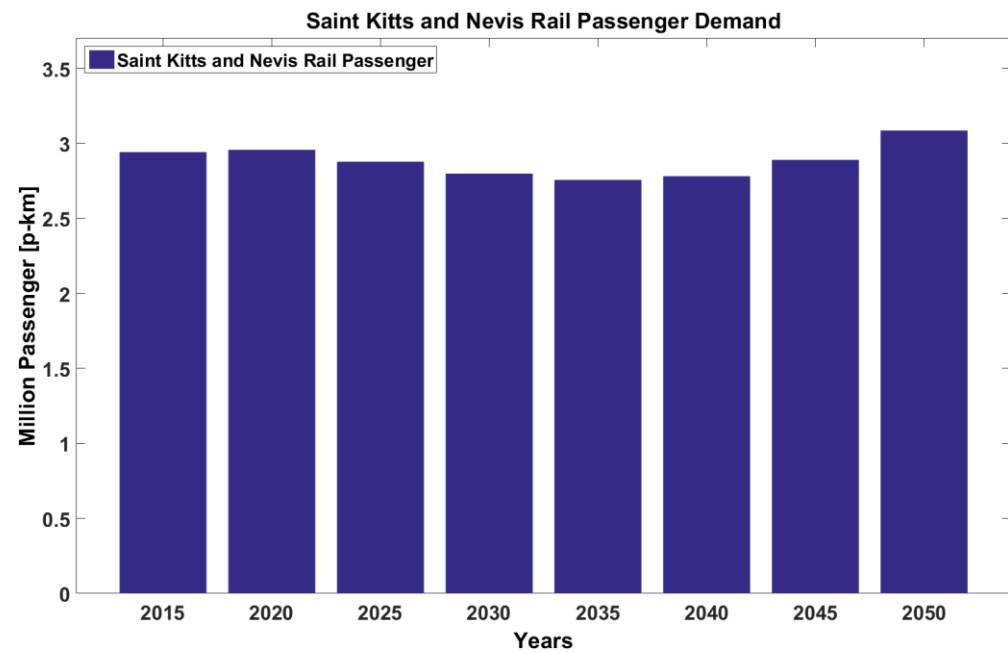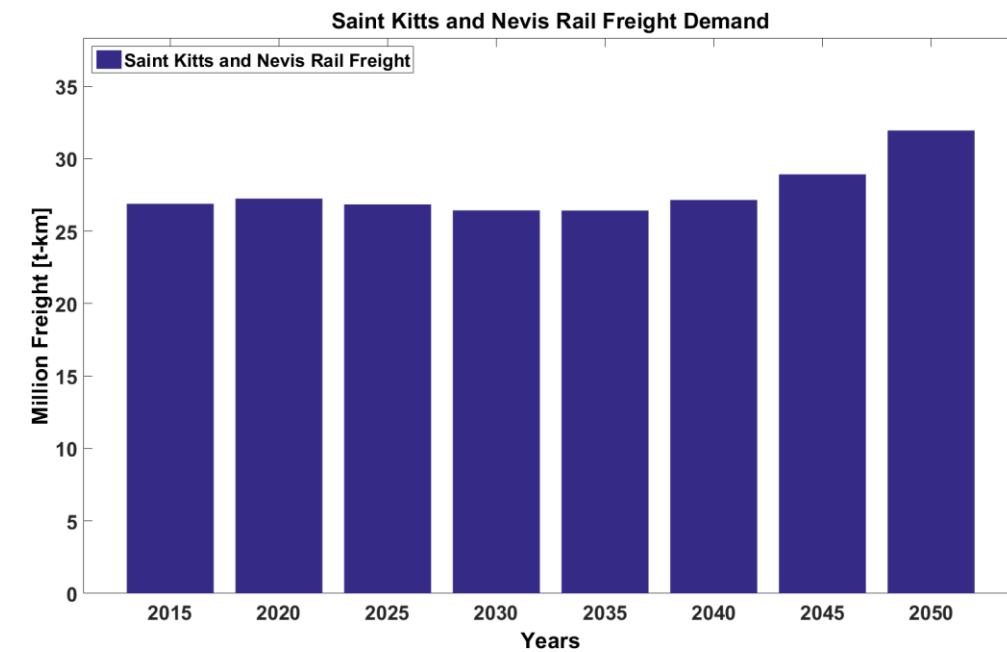

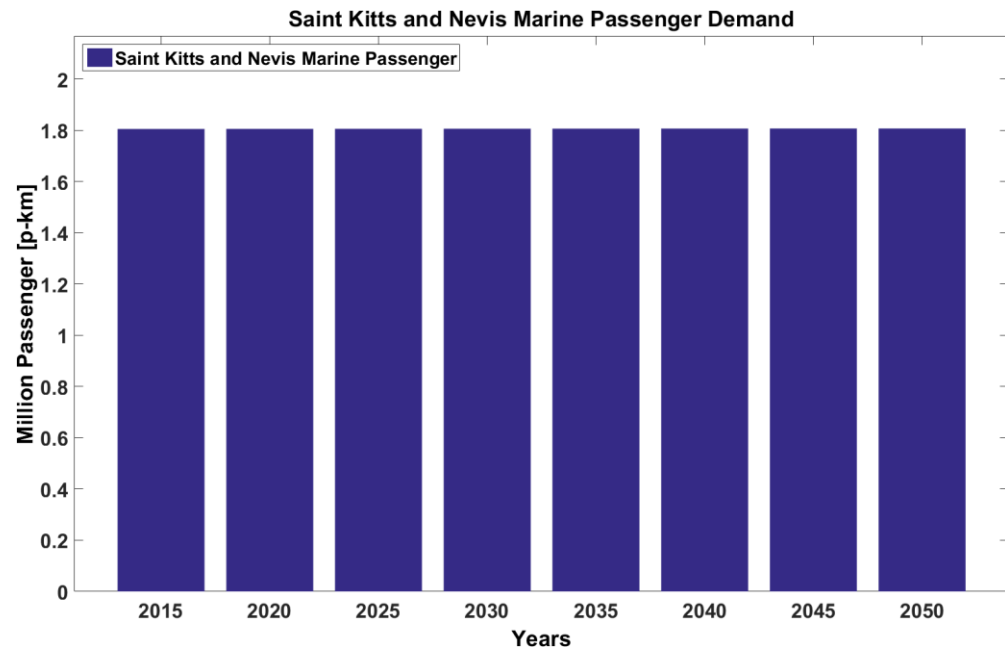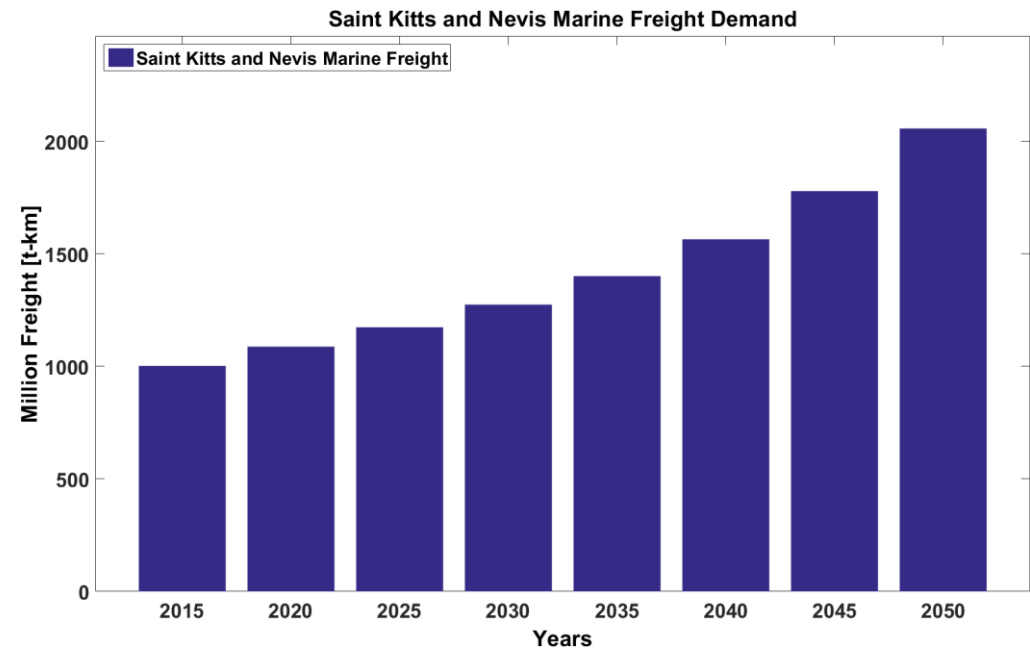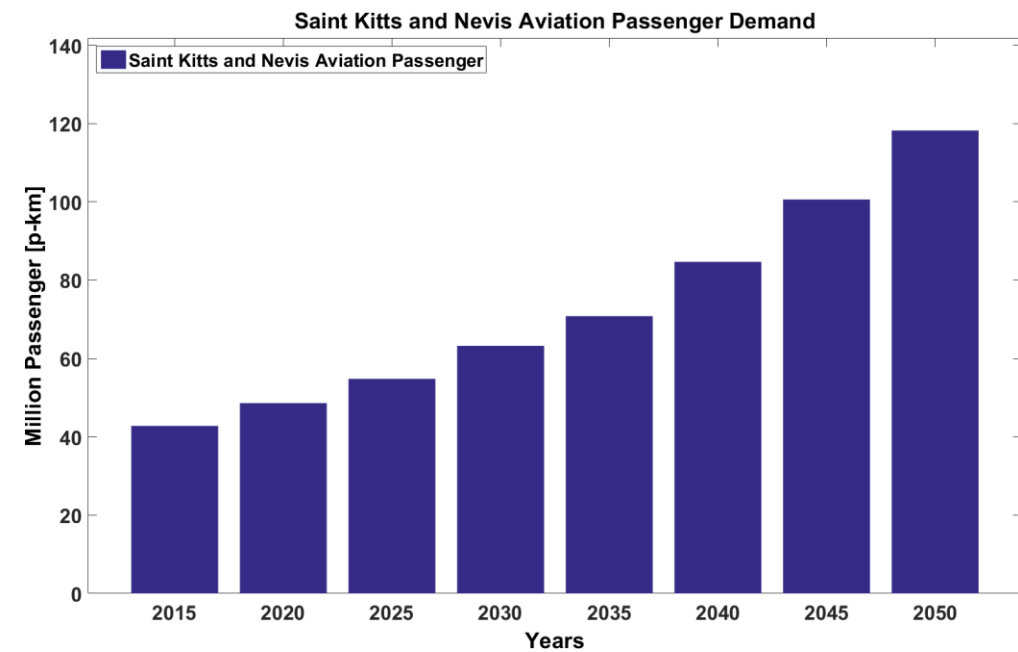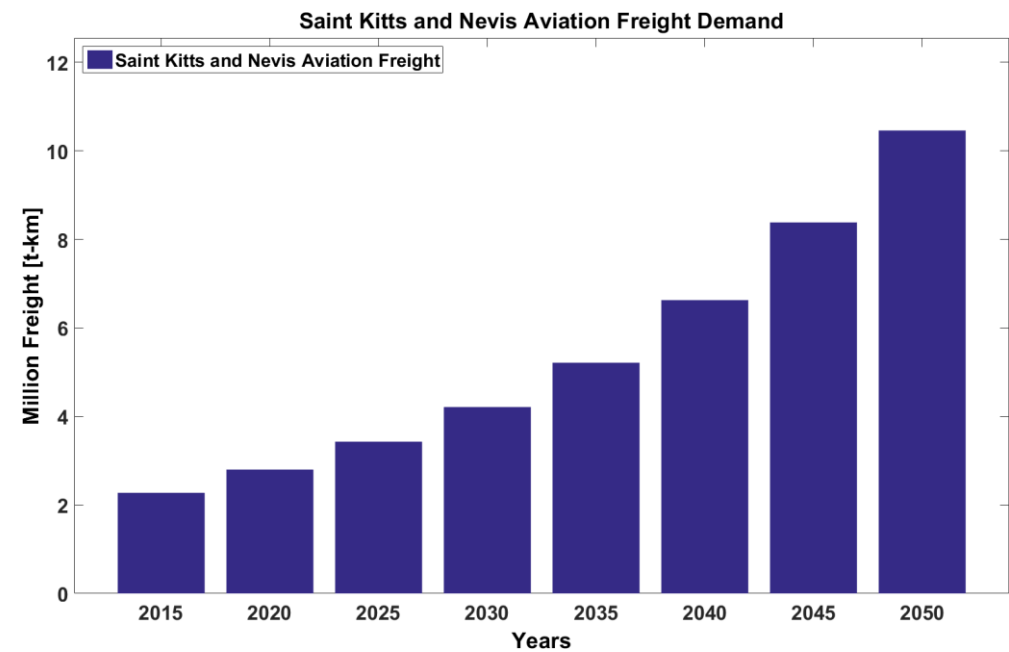

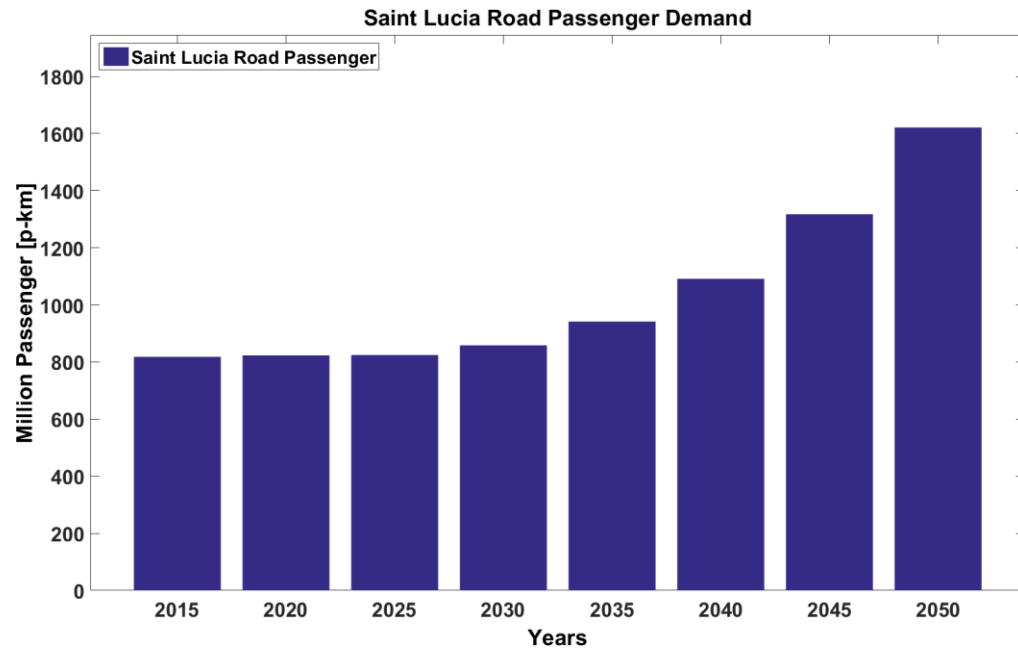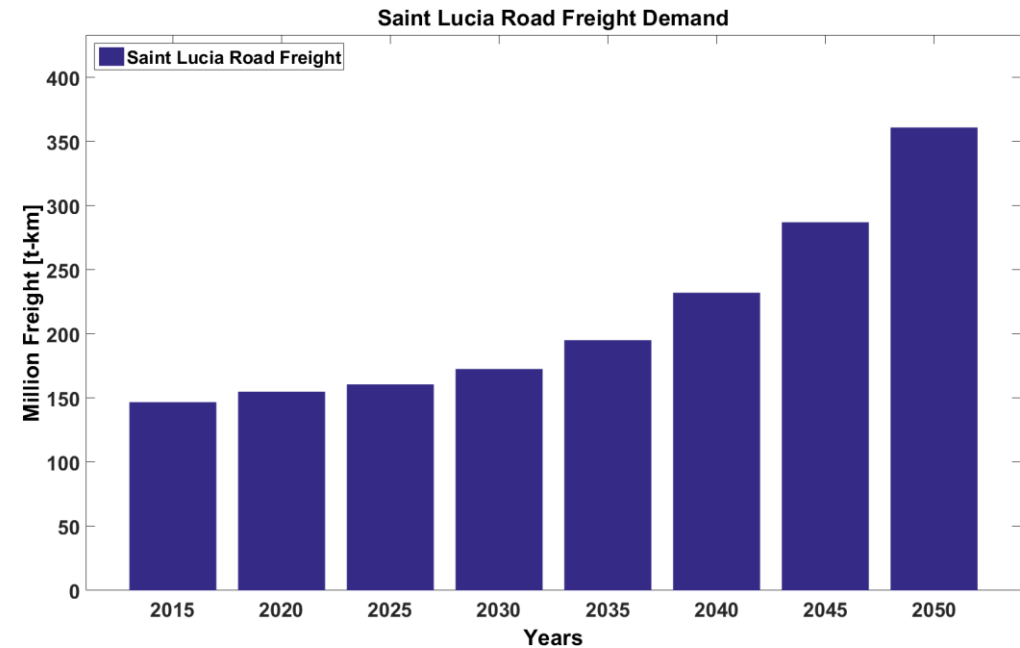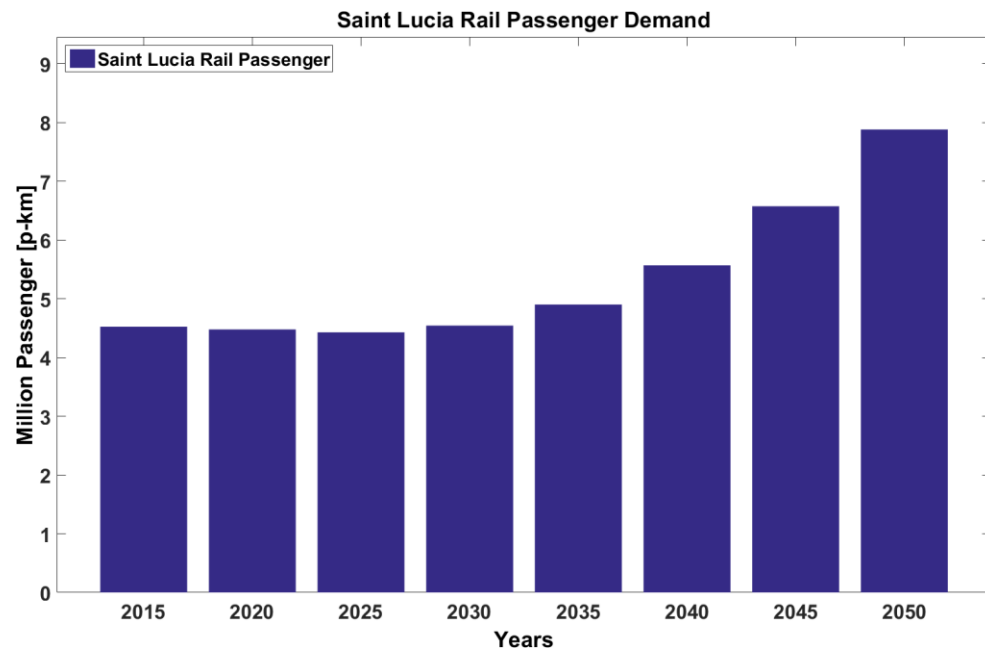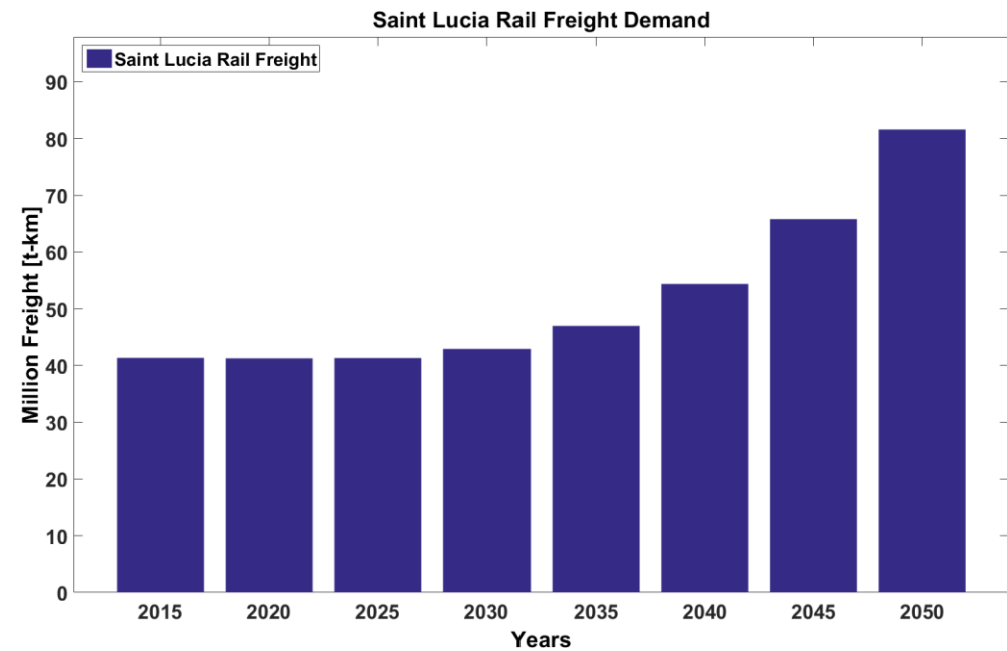

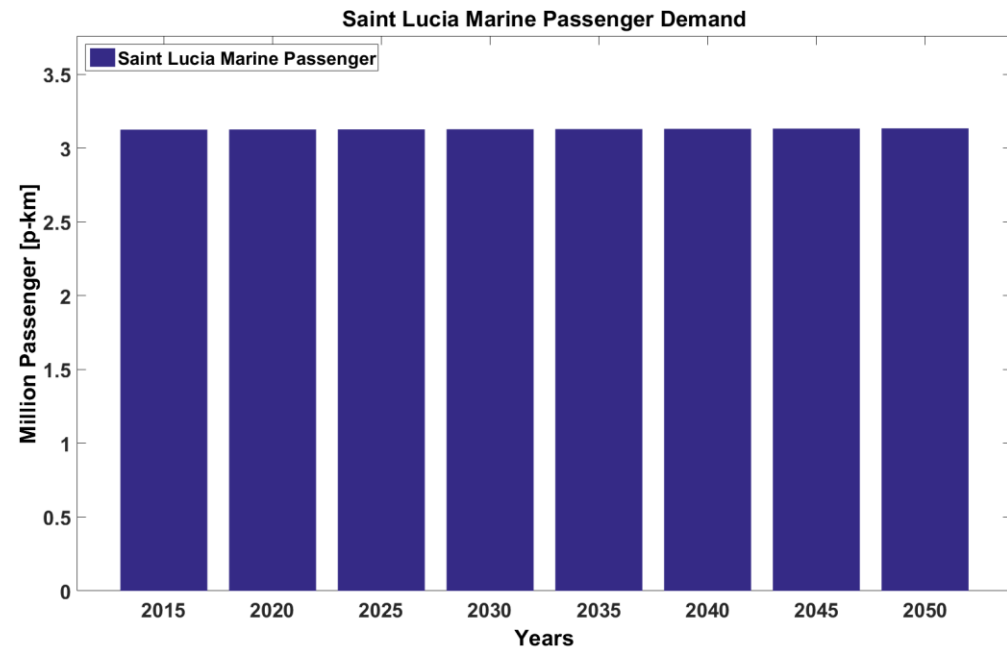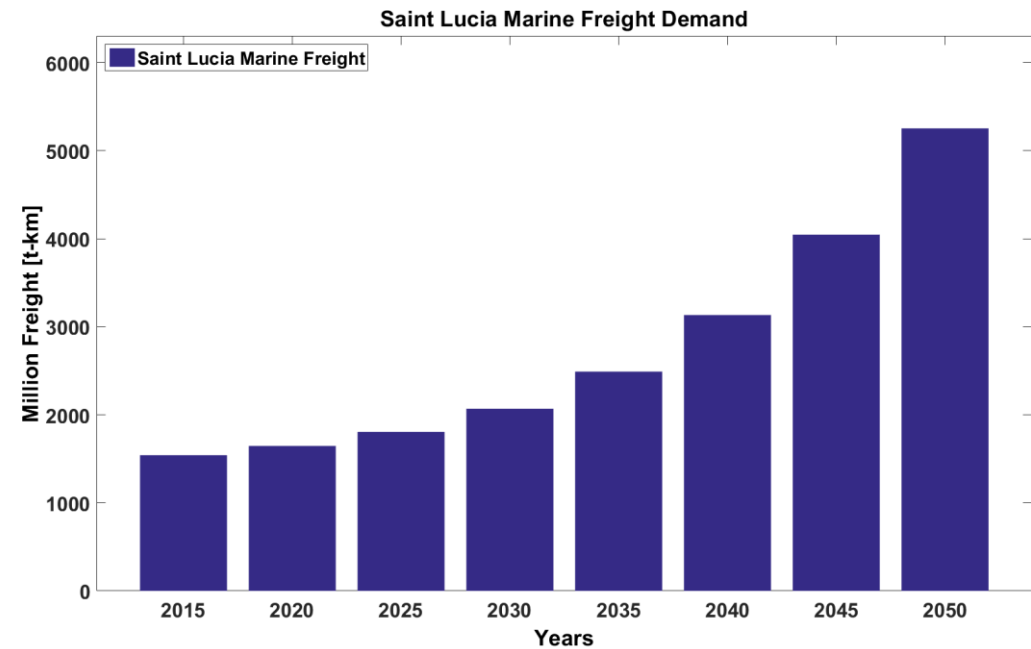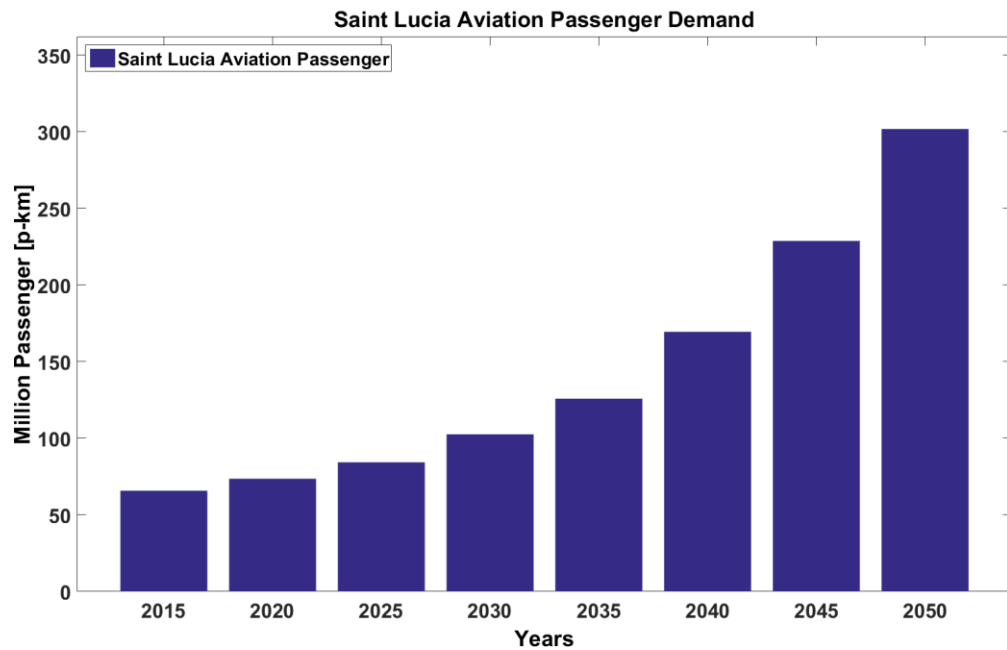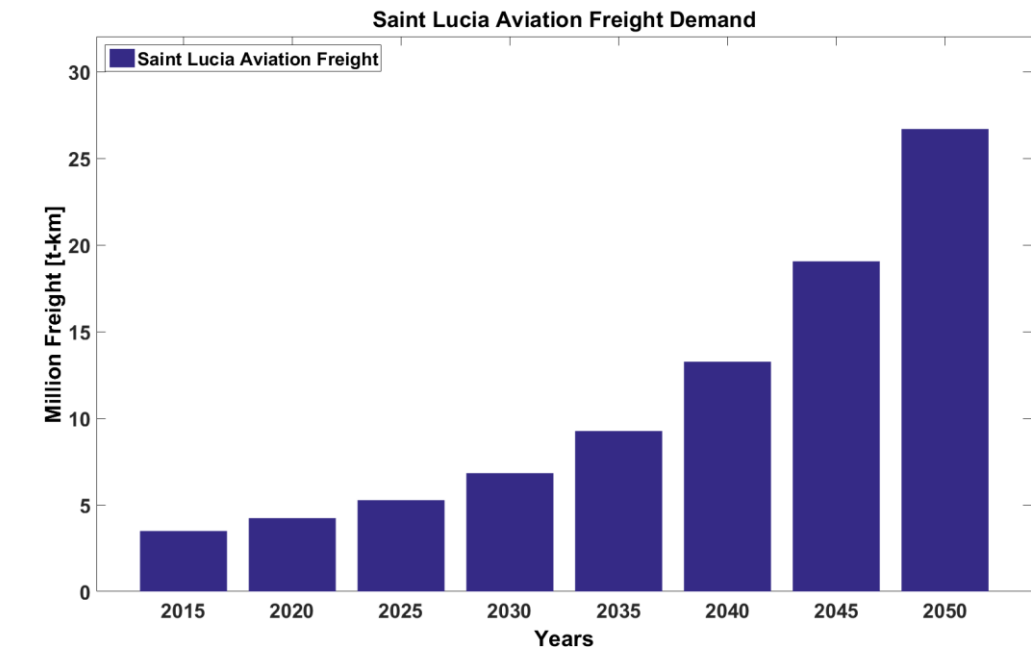

Saint Vincent and the Grenadines Road Passenger Demand

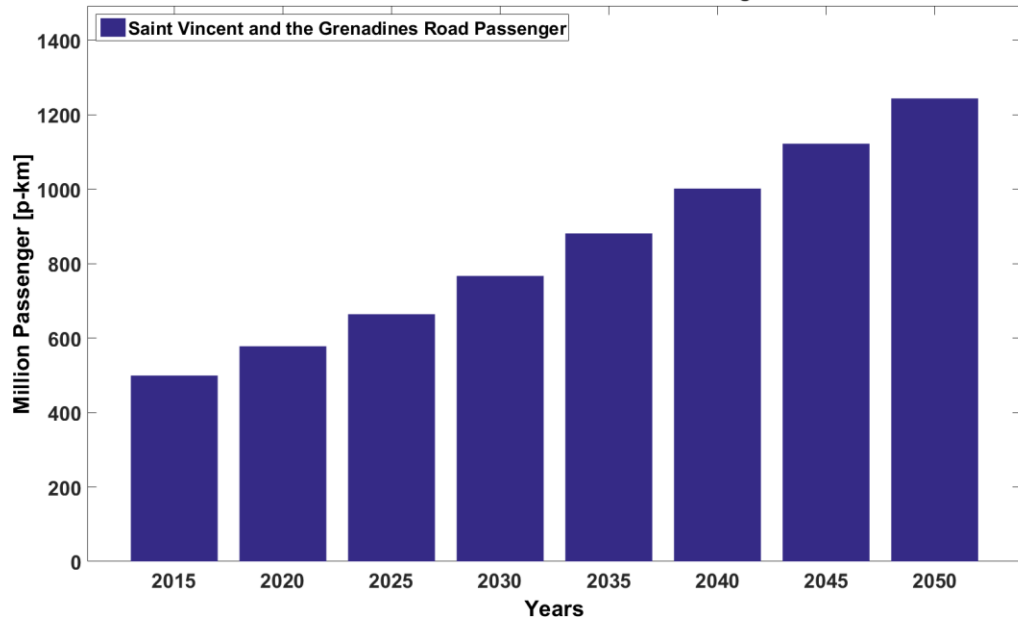

Saint Vincent and the Grenadines Road Freight Demand

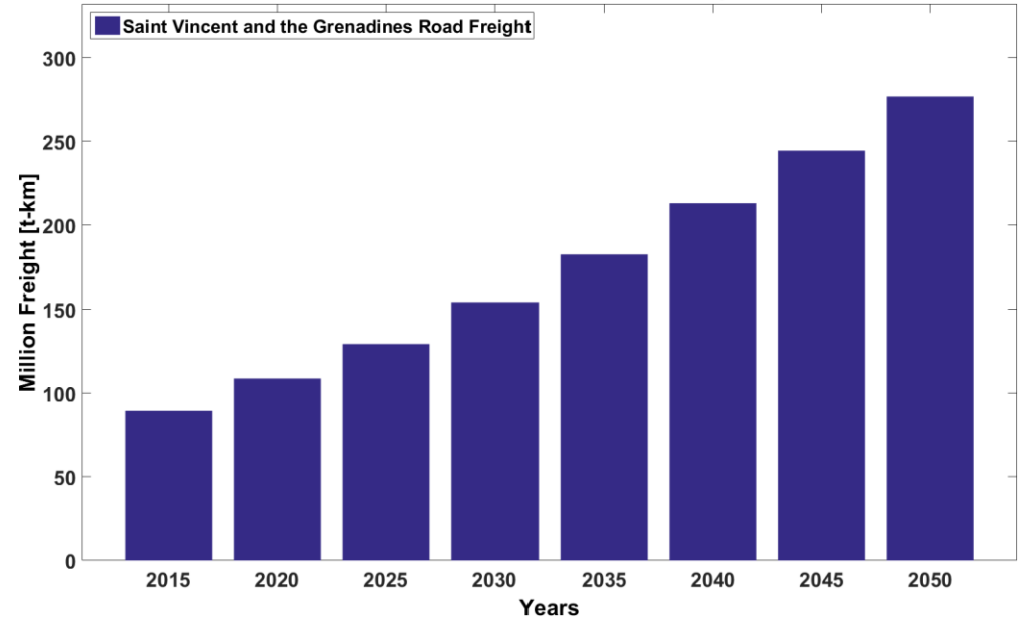

Saint Vincent and the Grenadines Rail Passenger Demand

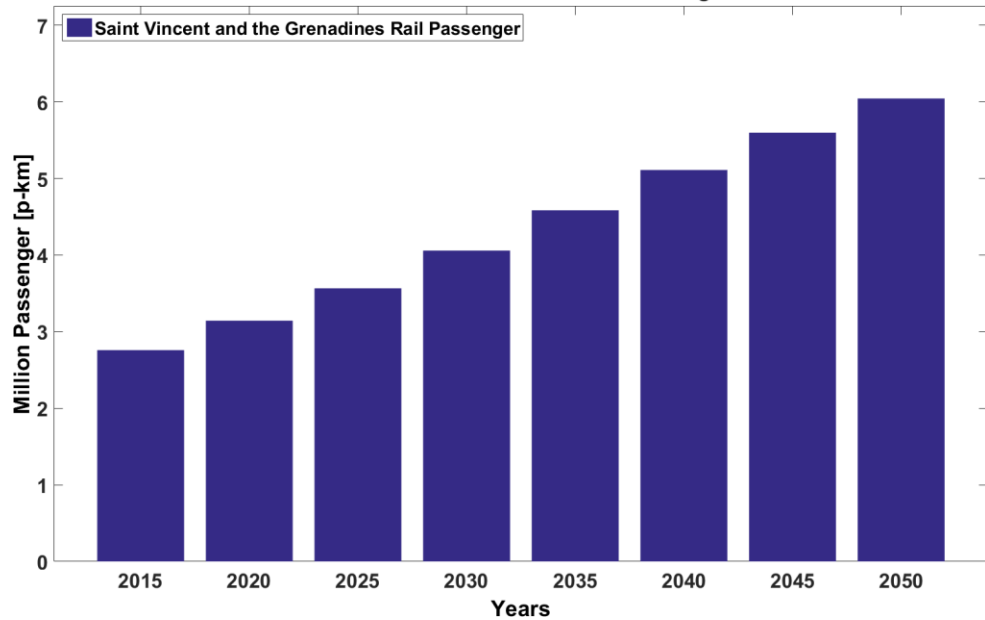

Saint Vincent and the Grenadines Rail Freight Demand

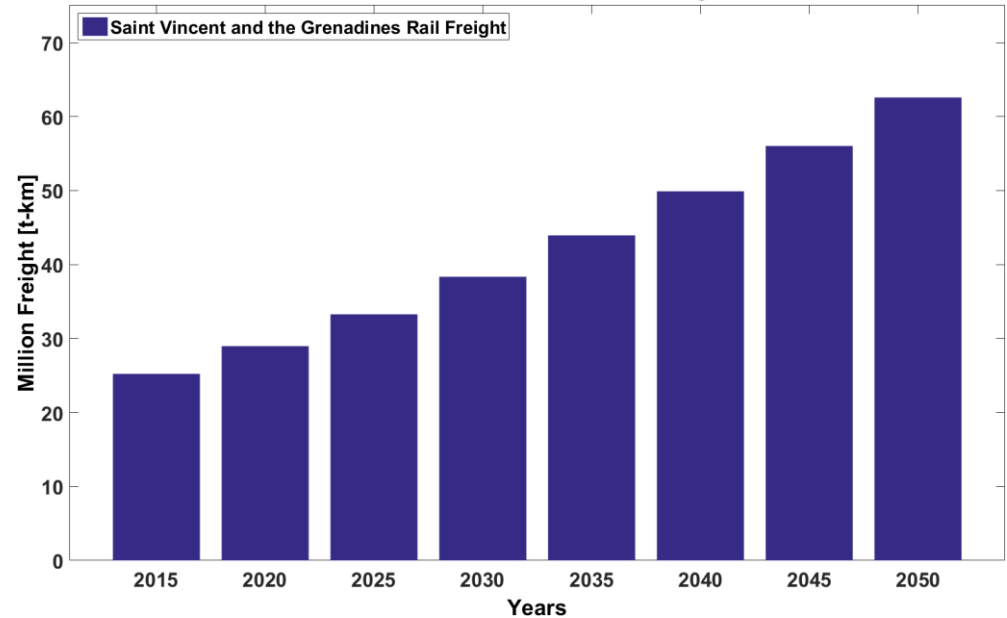

**Saint Vincent and the Grenadines Aviation Freight Demand**

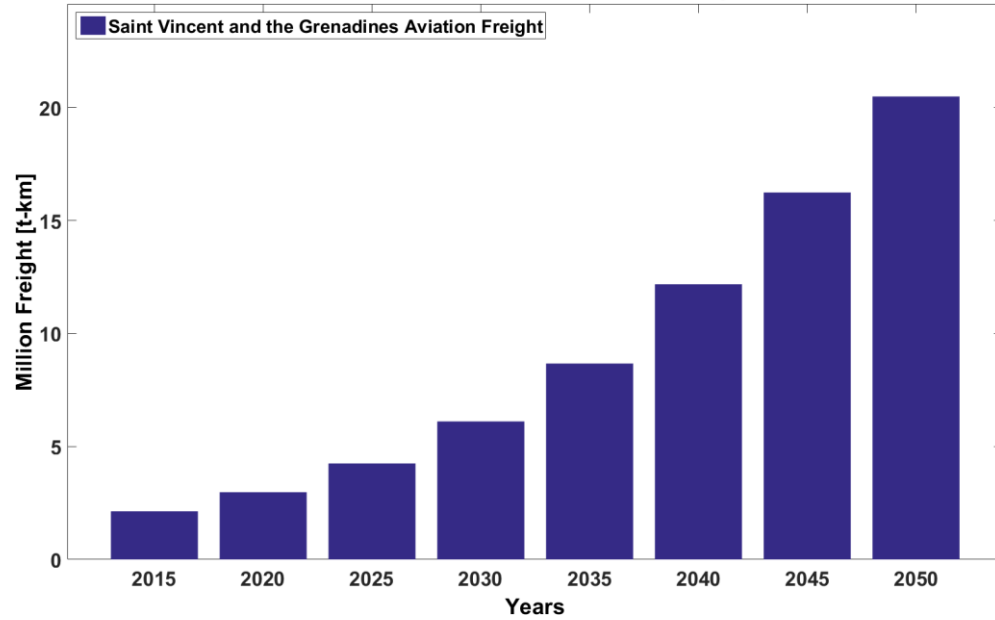

**Saint Vincent and the Grenadines Marine Freight Demand**

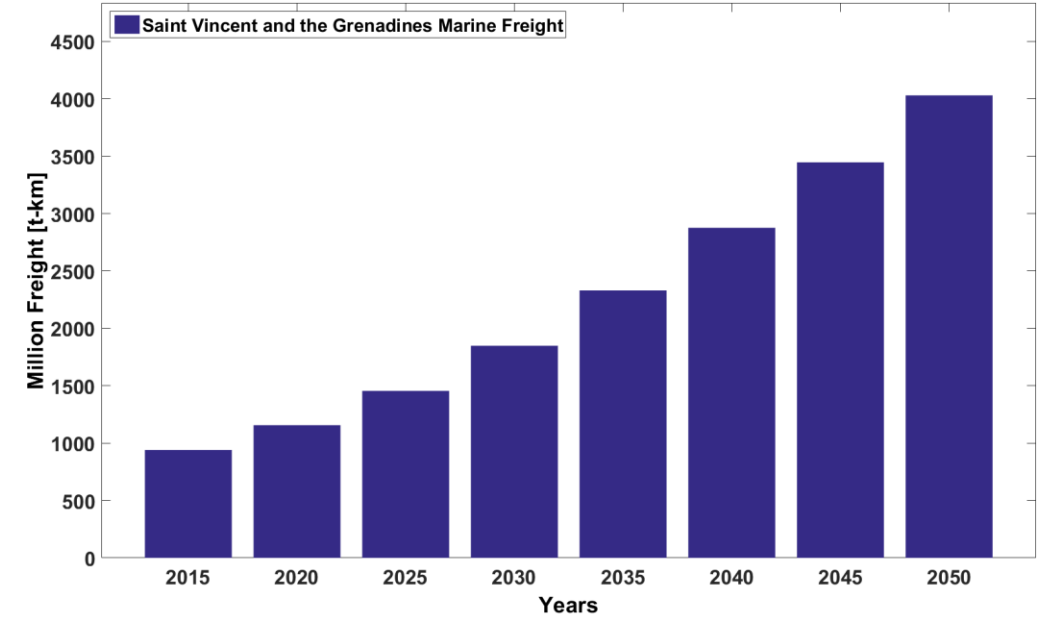

**Saint Vincent and the Grenadines Marine Passenger Demand**

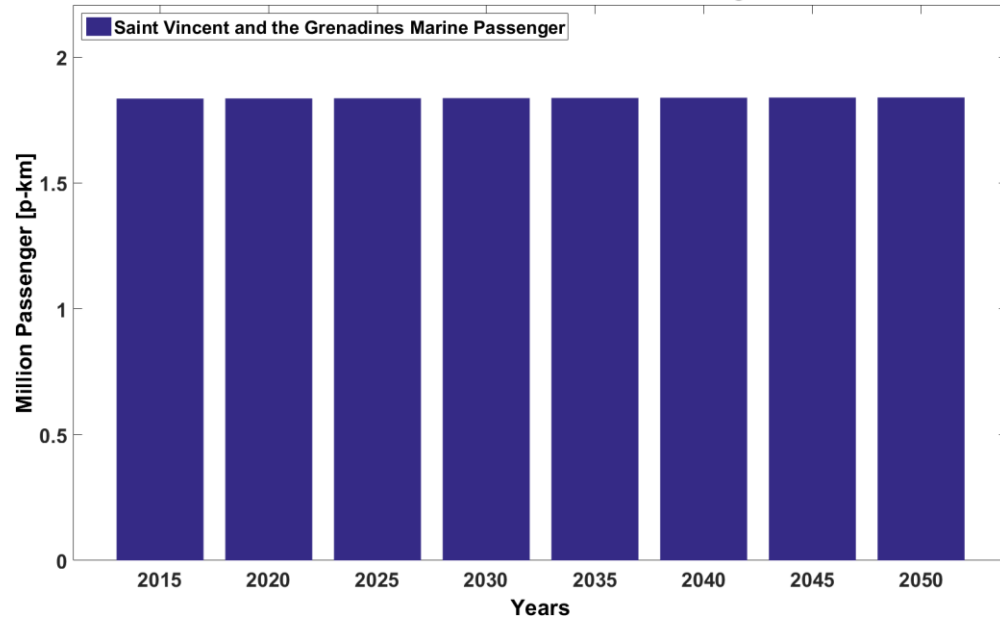

**Saint Vincent and the Grenadines Aviation Passenger Demand**

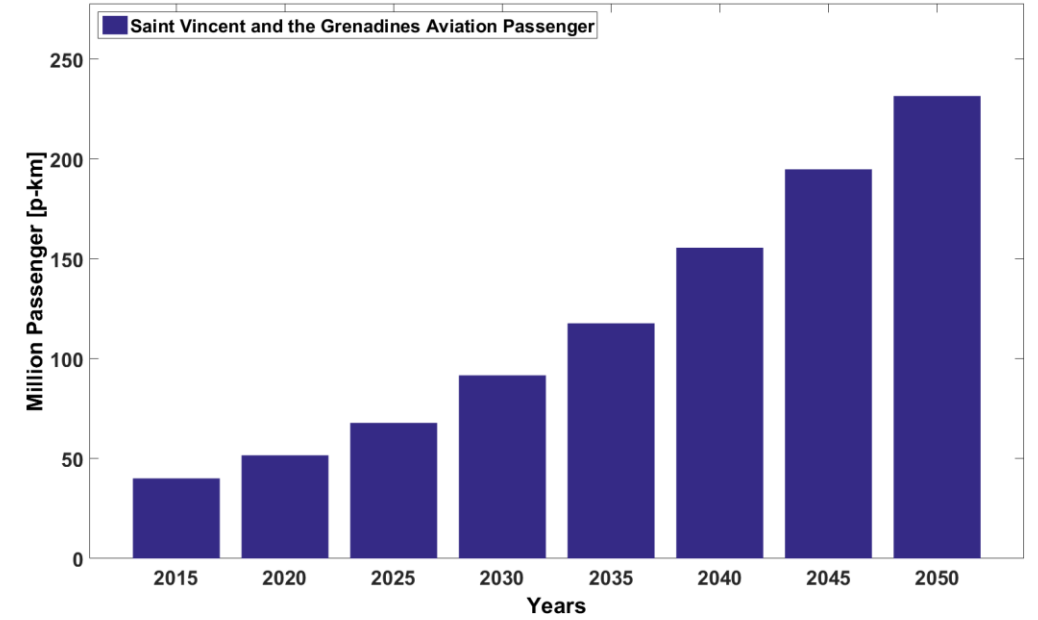

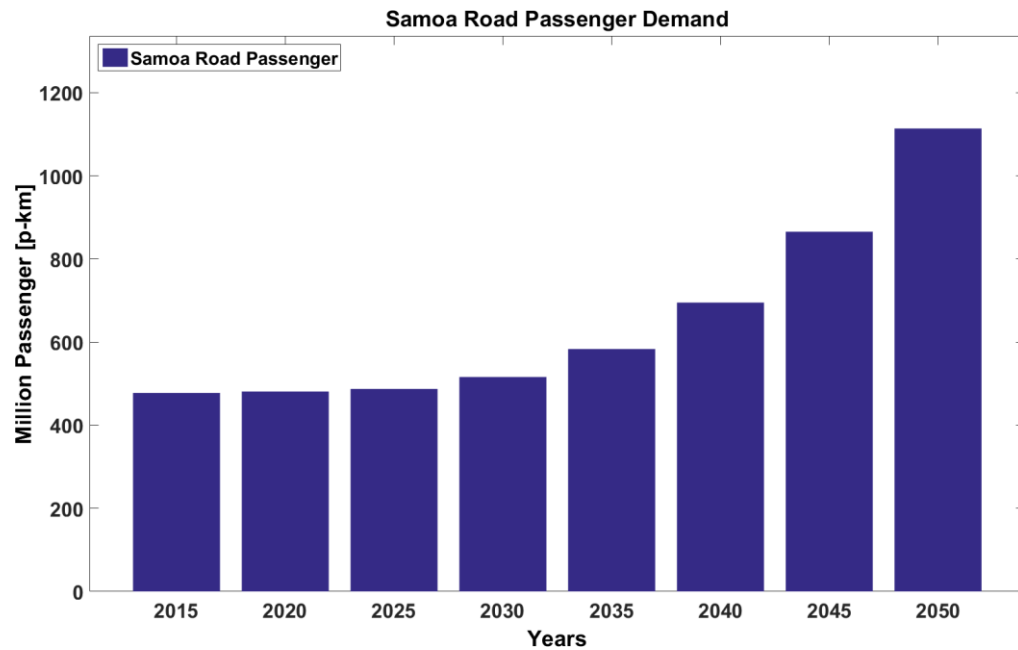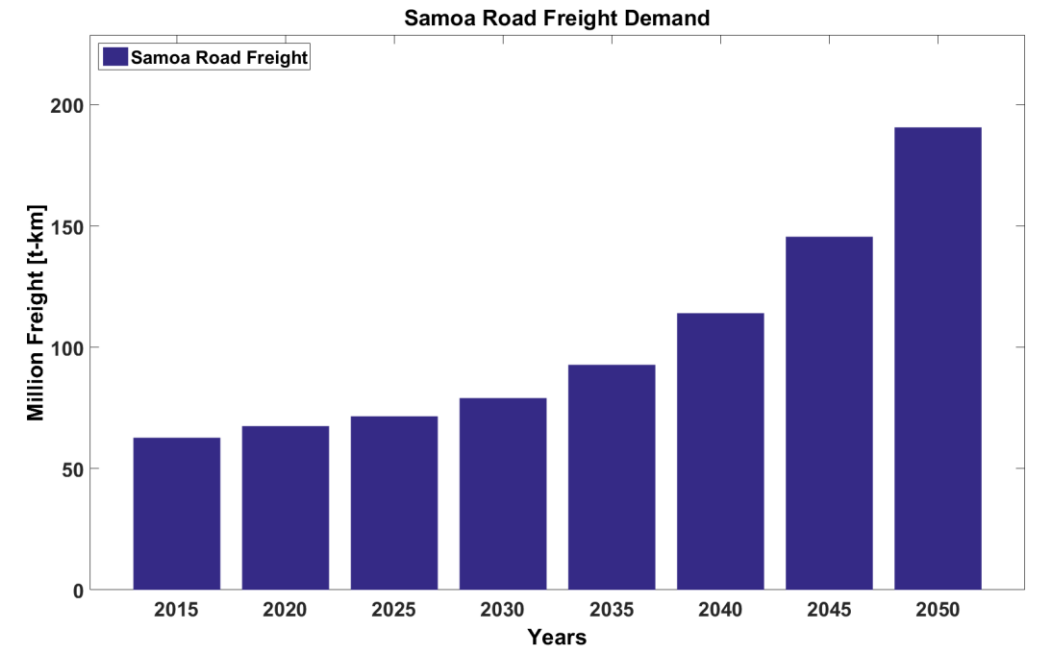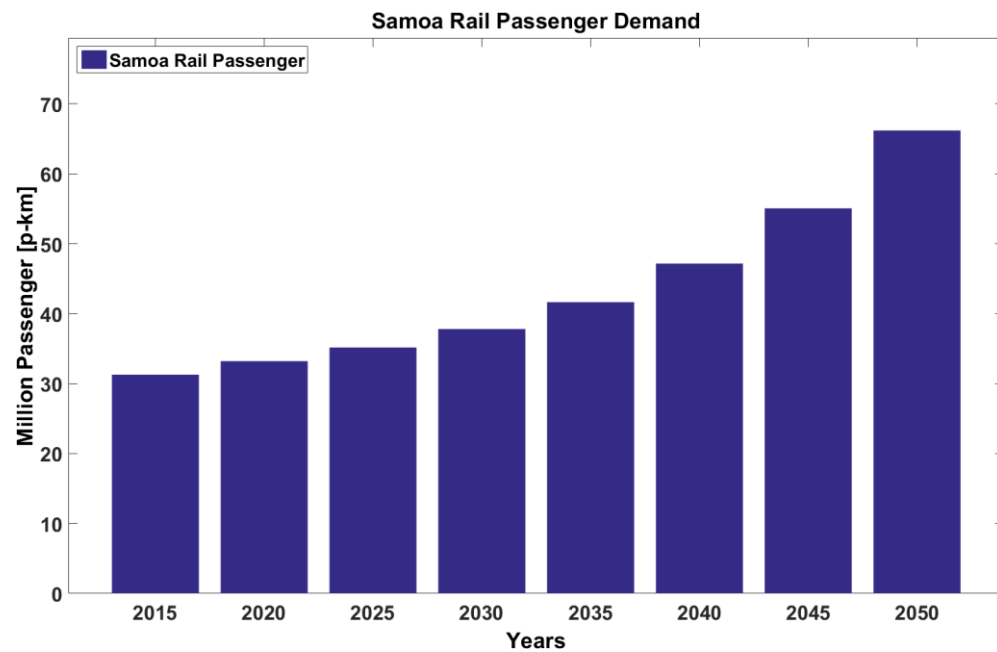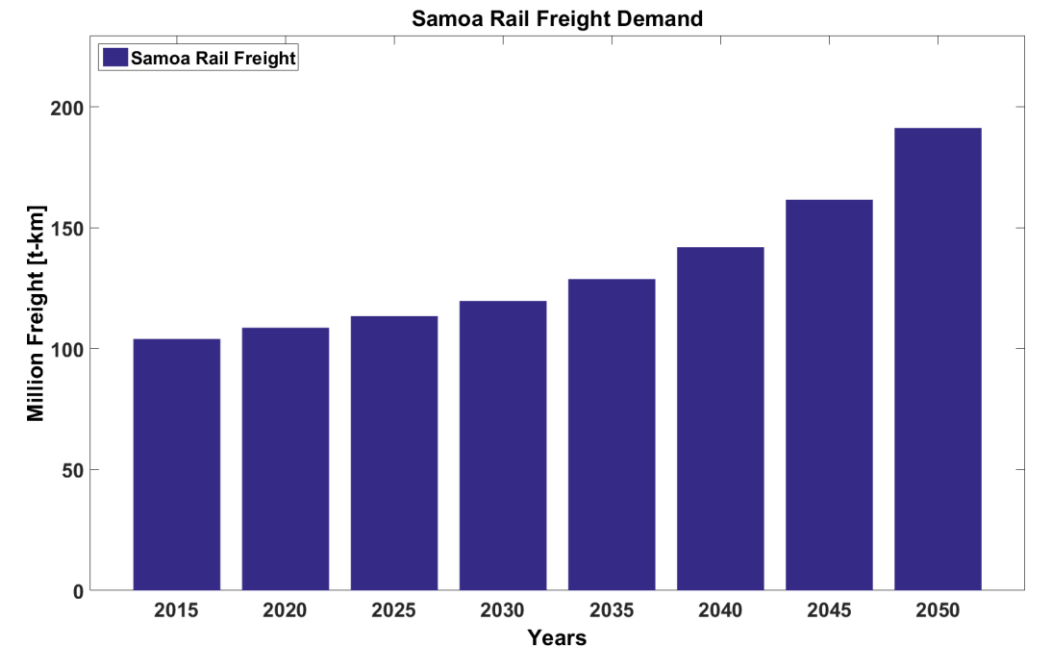

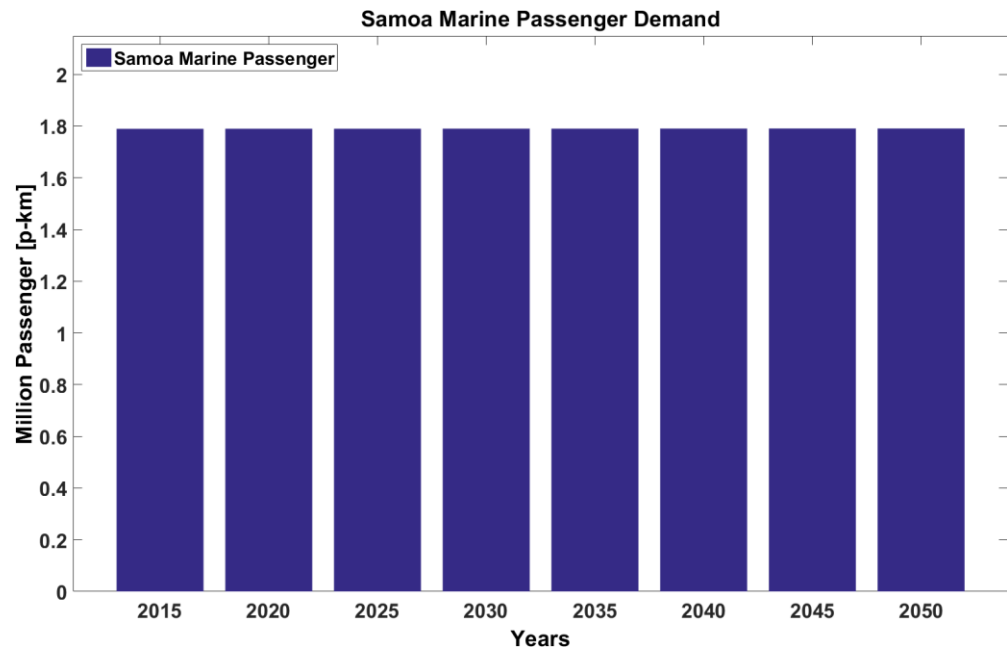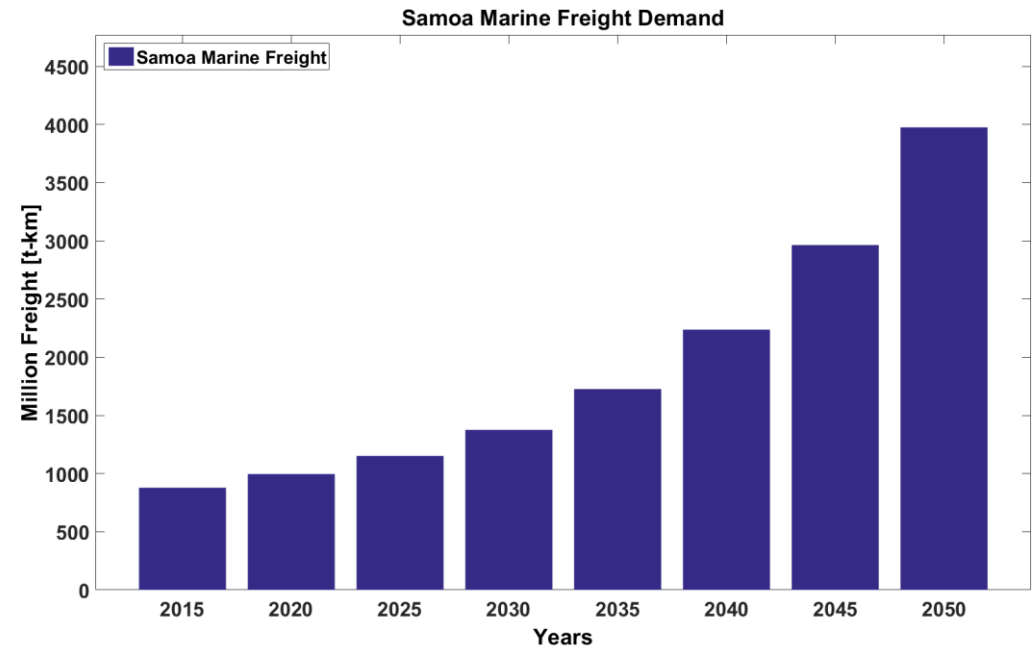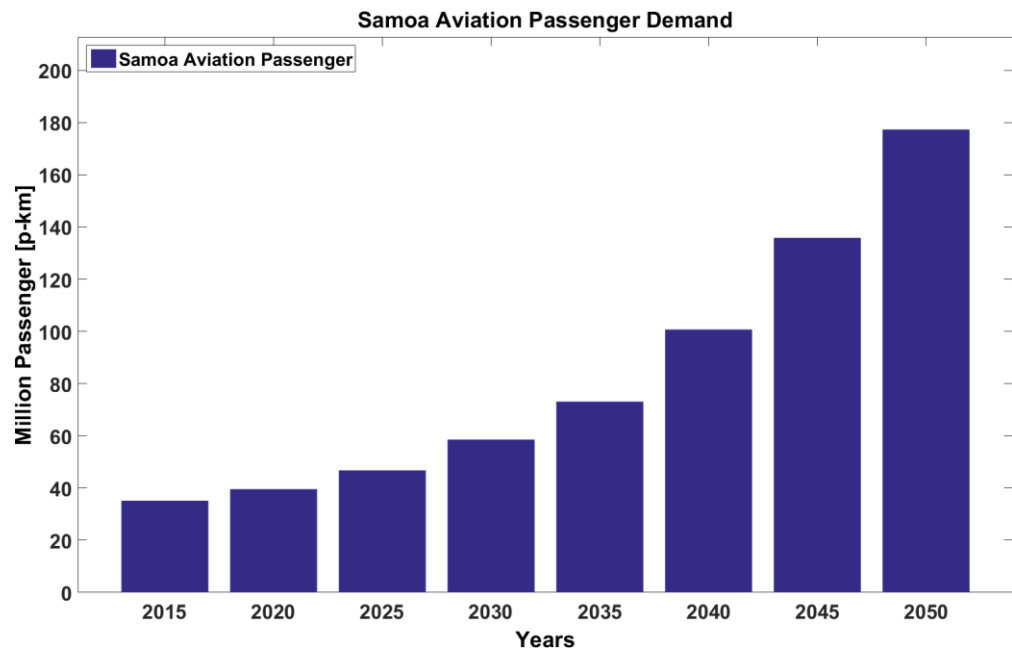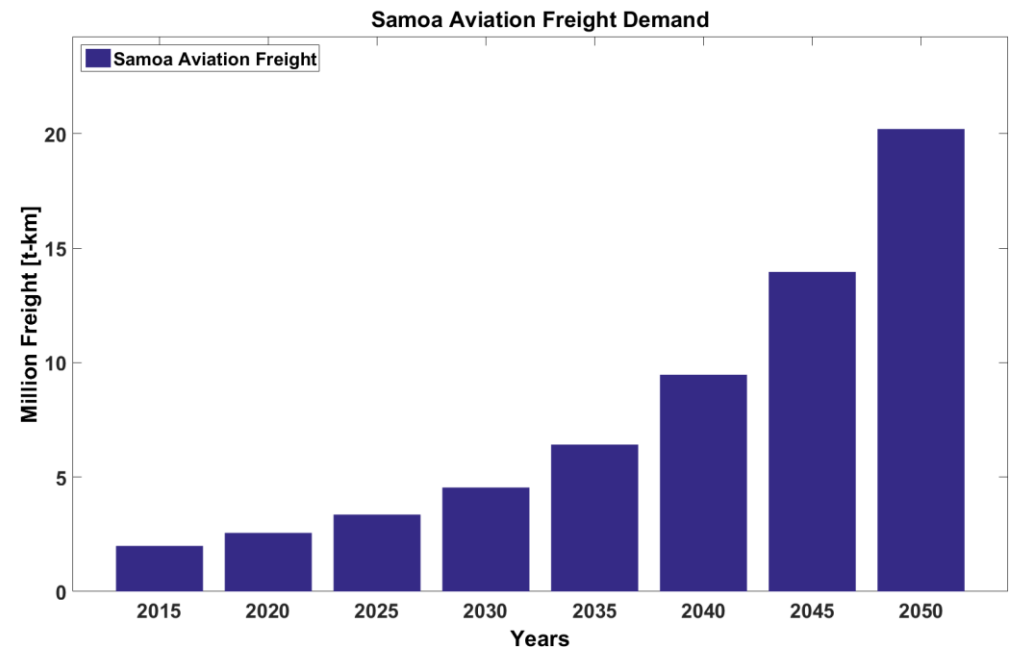

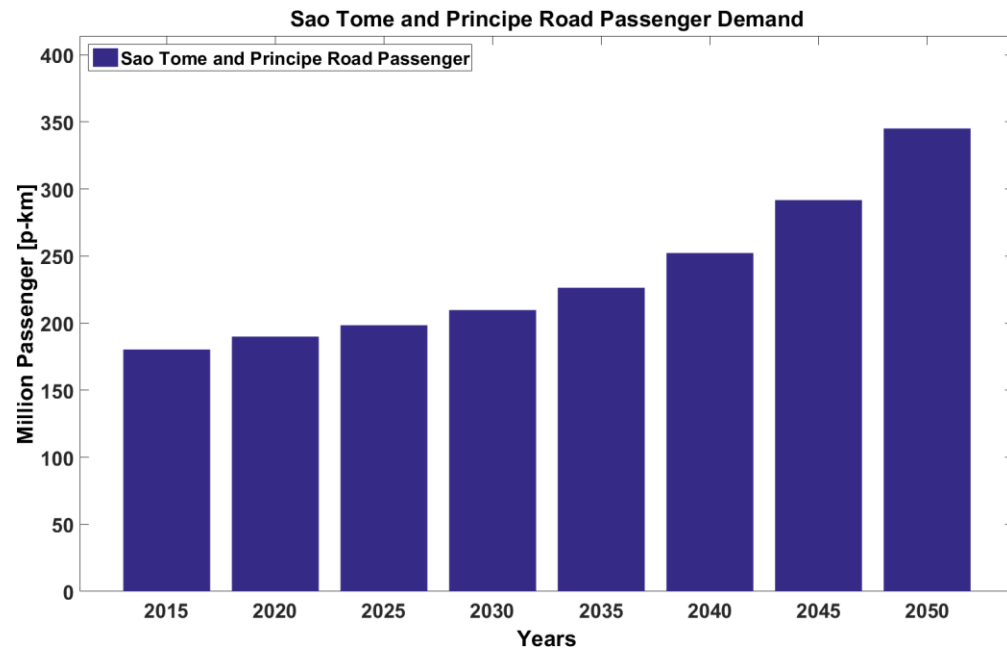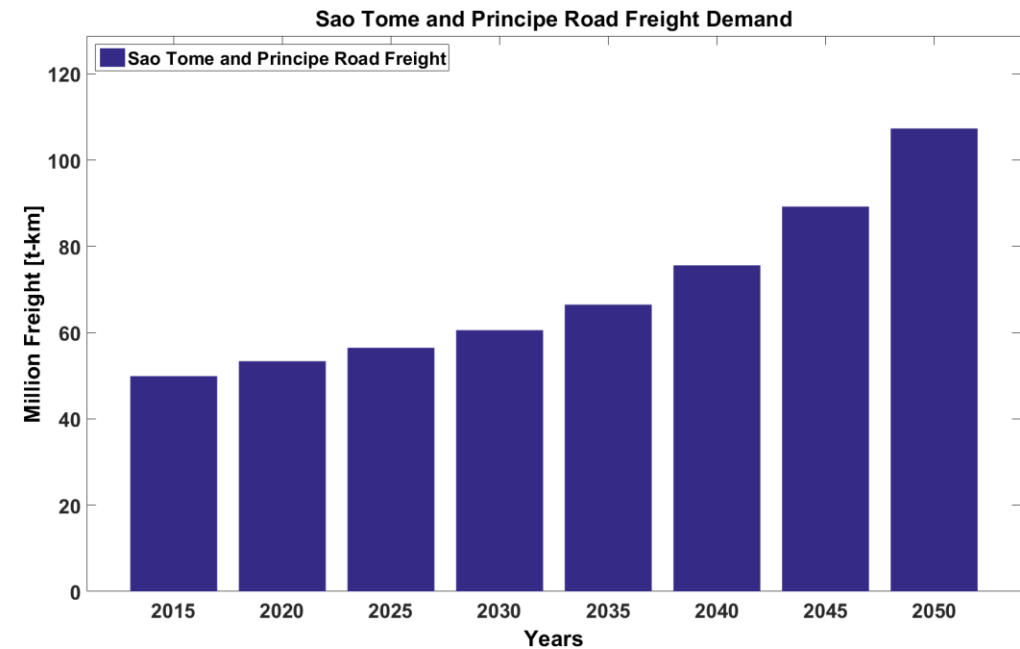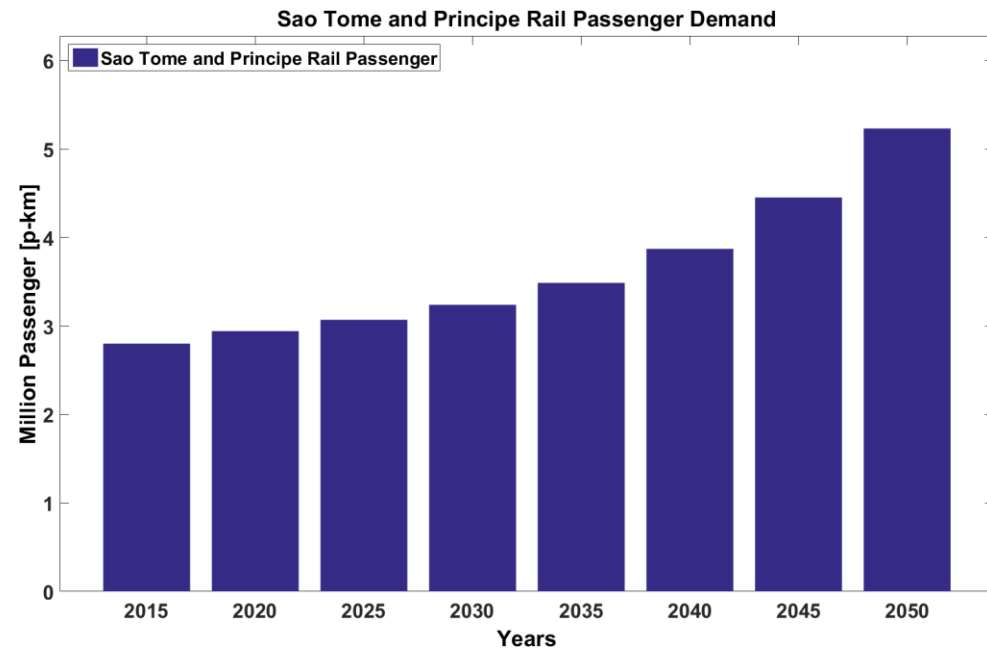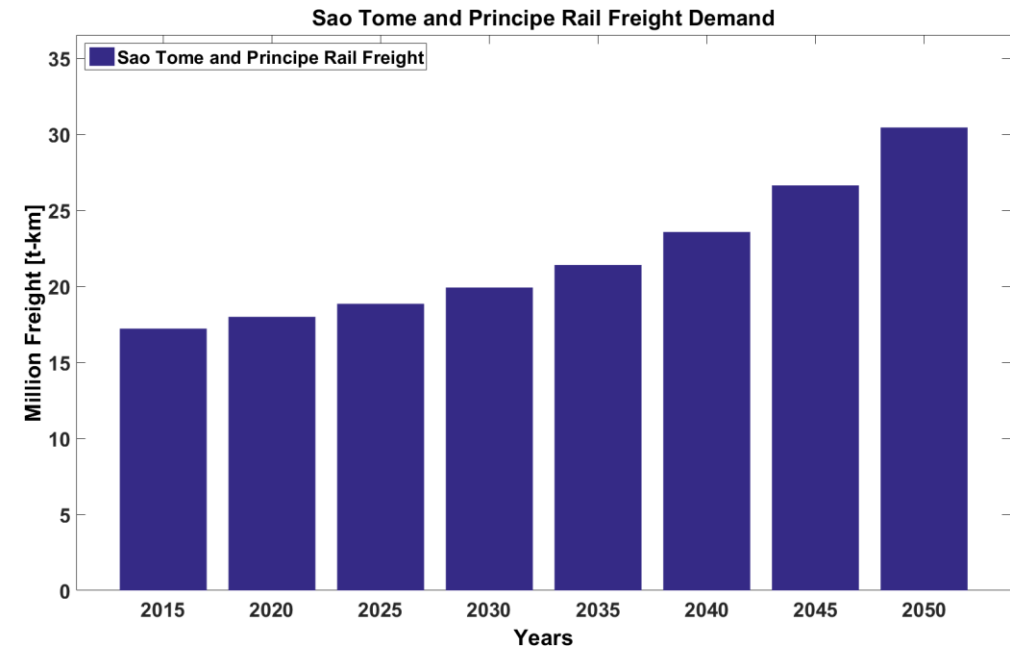

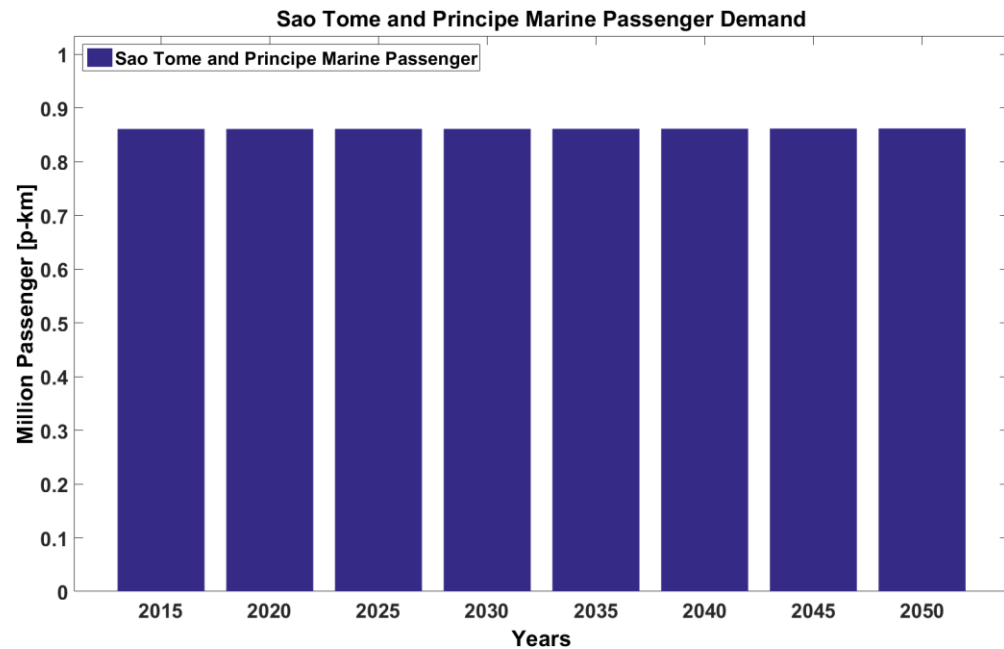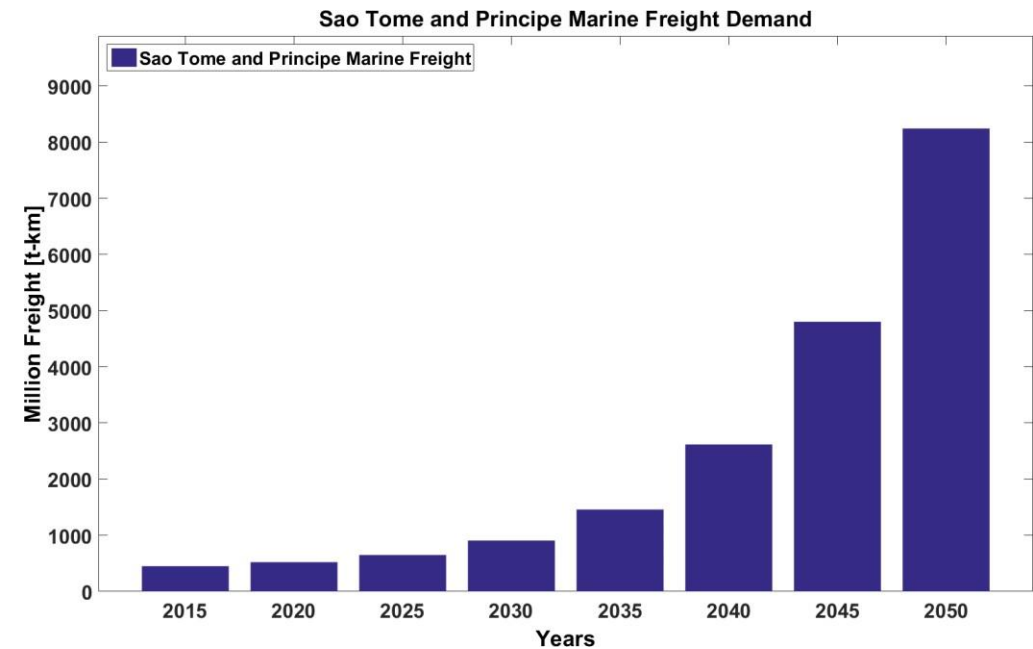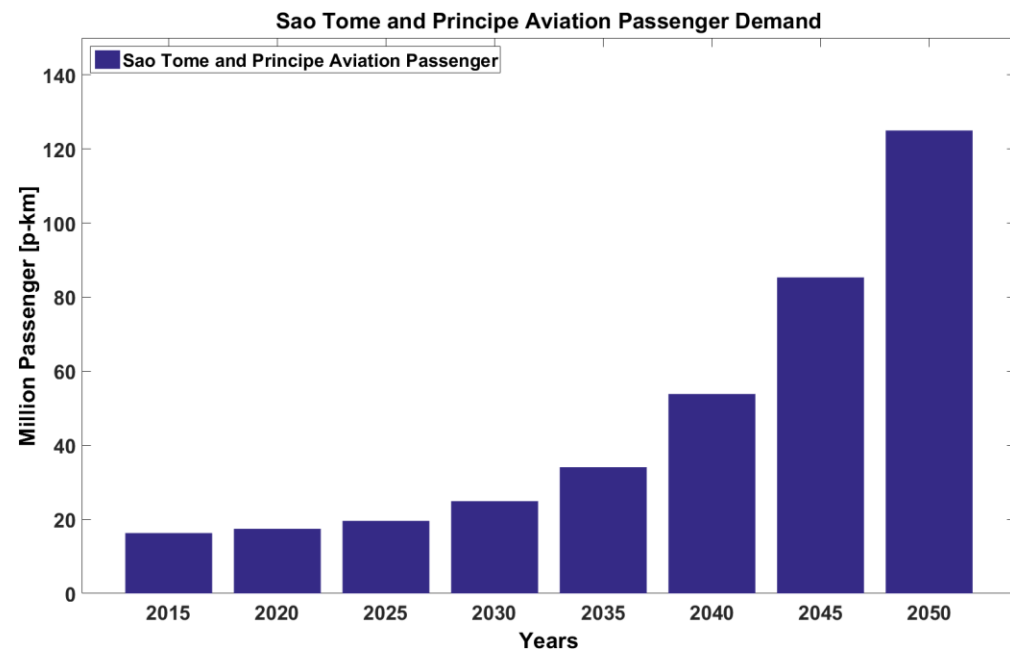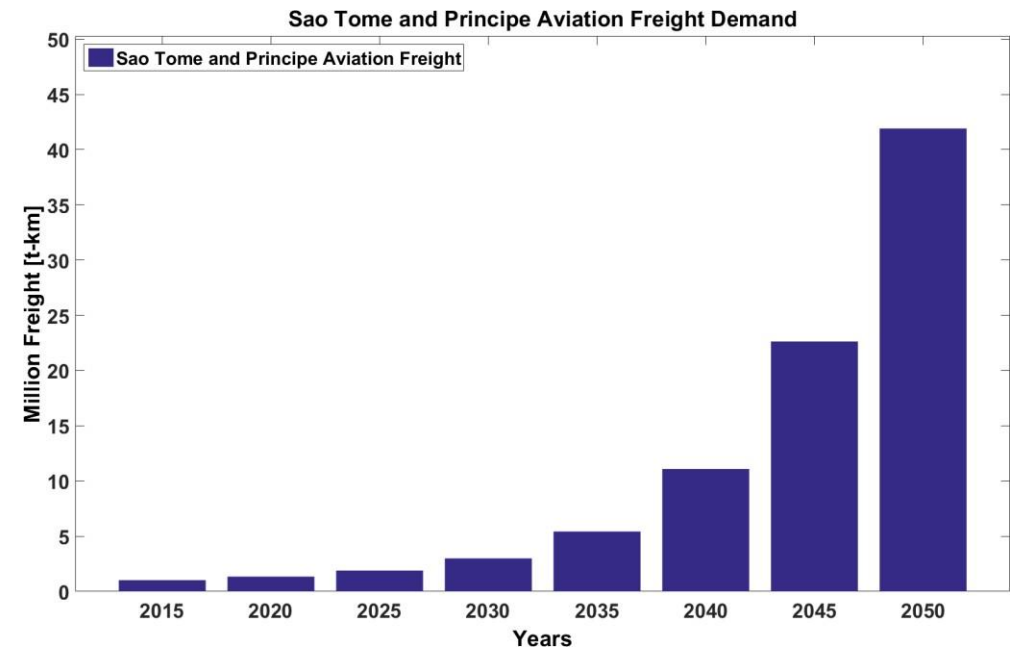

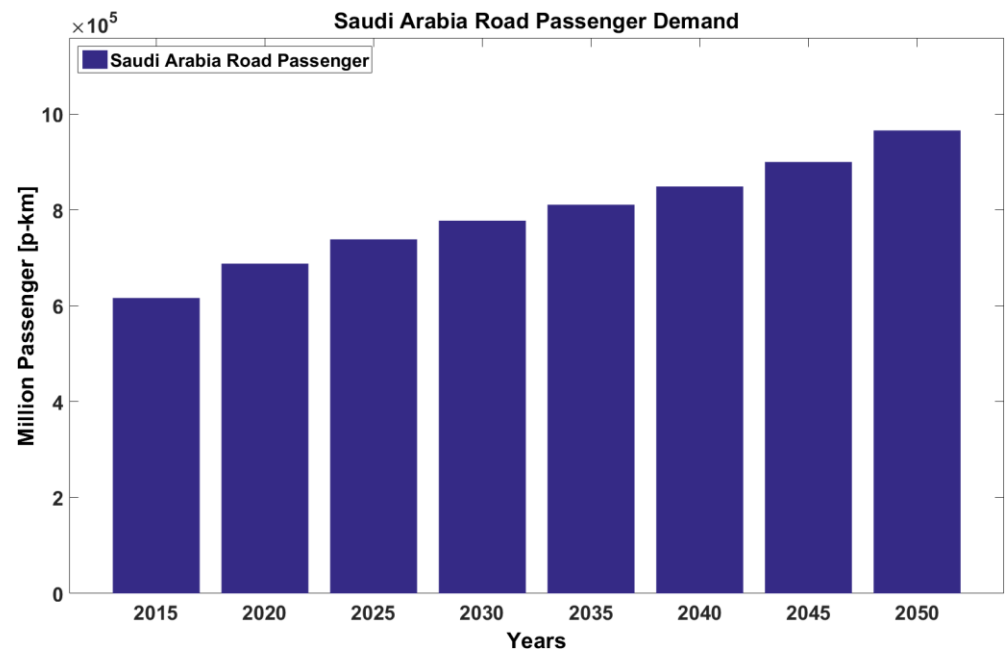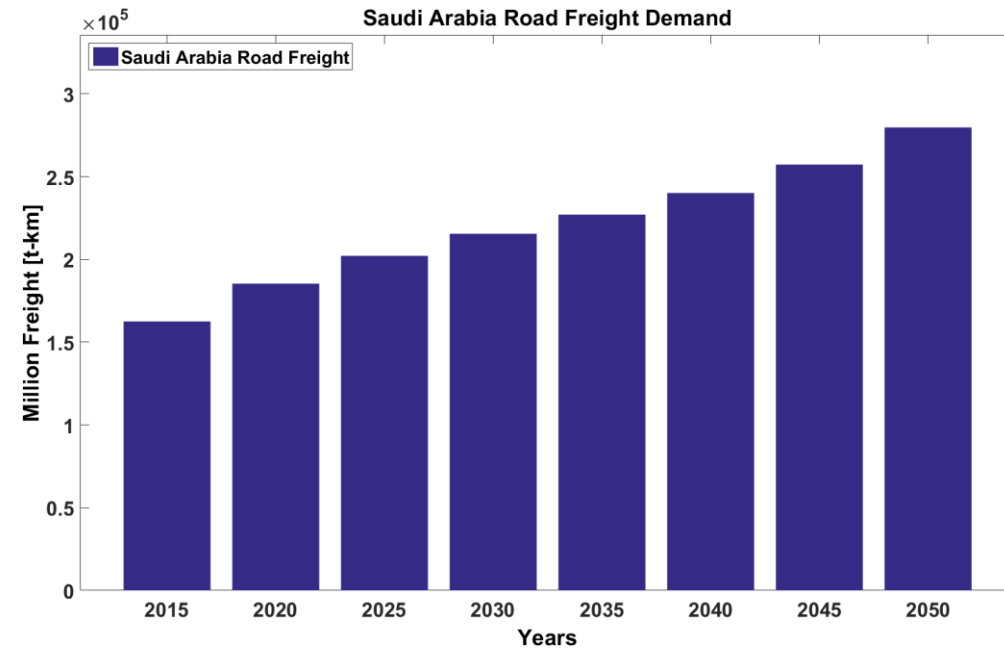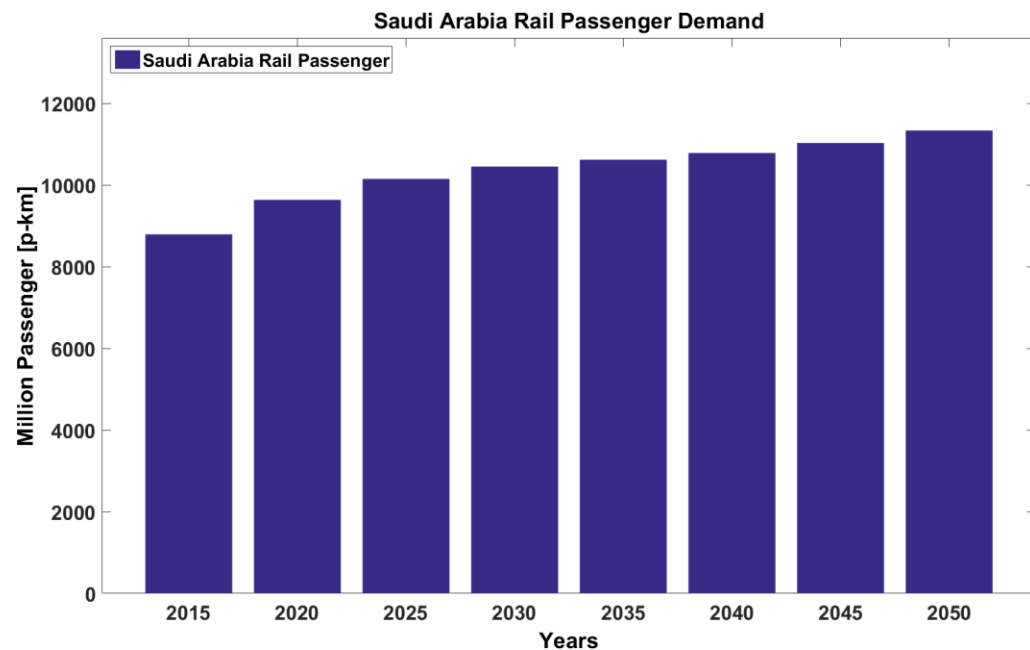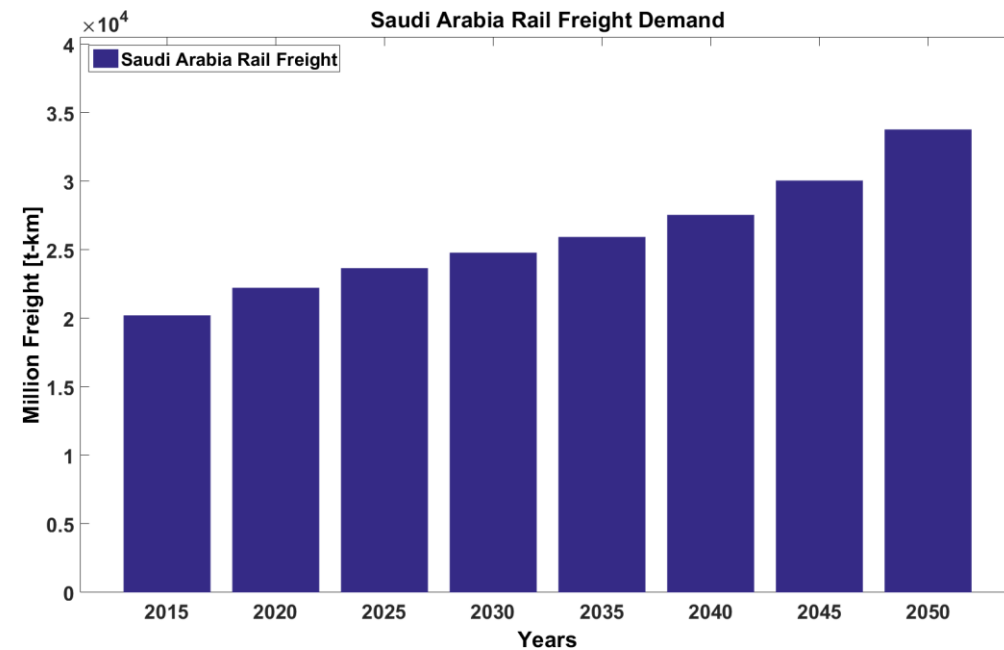

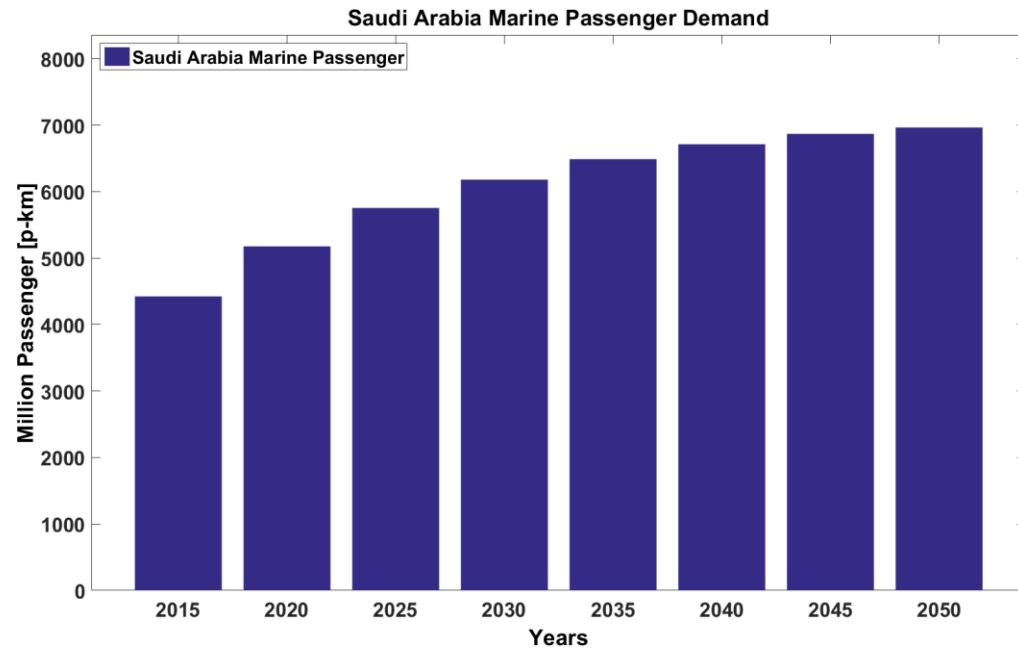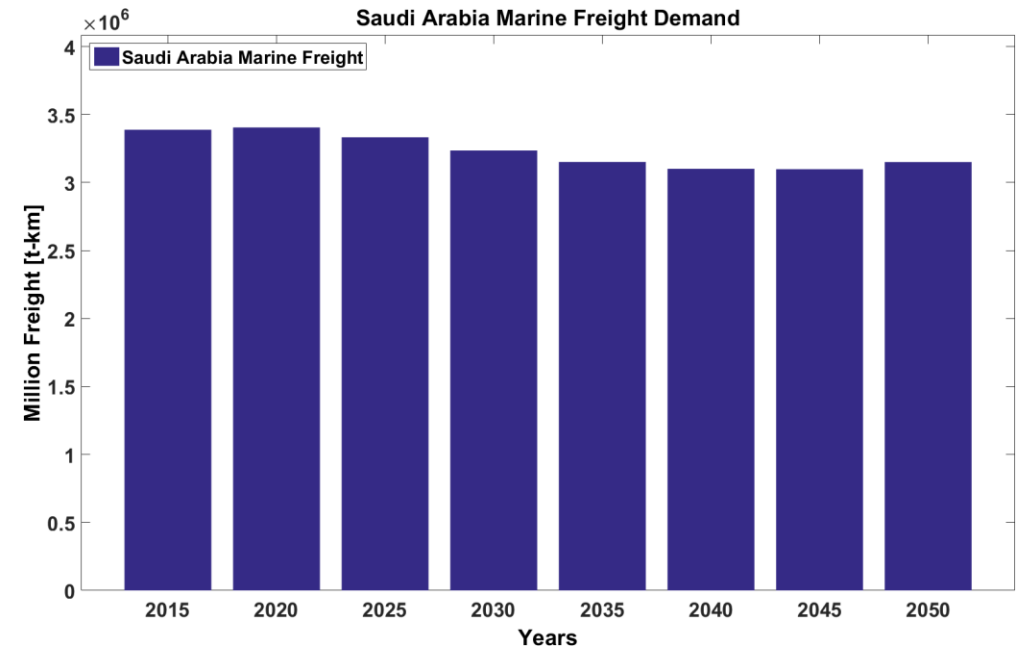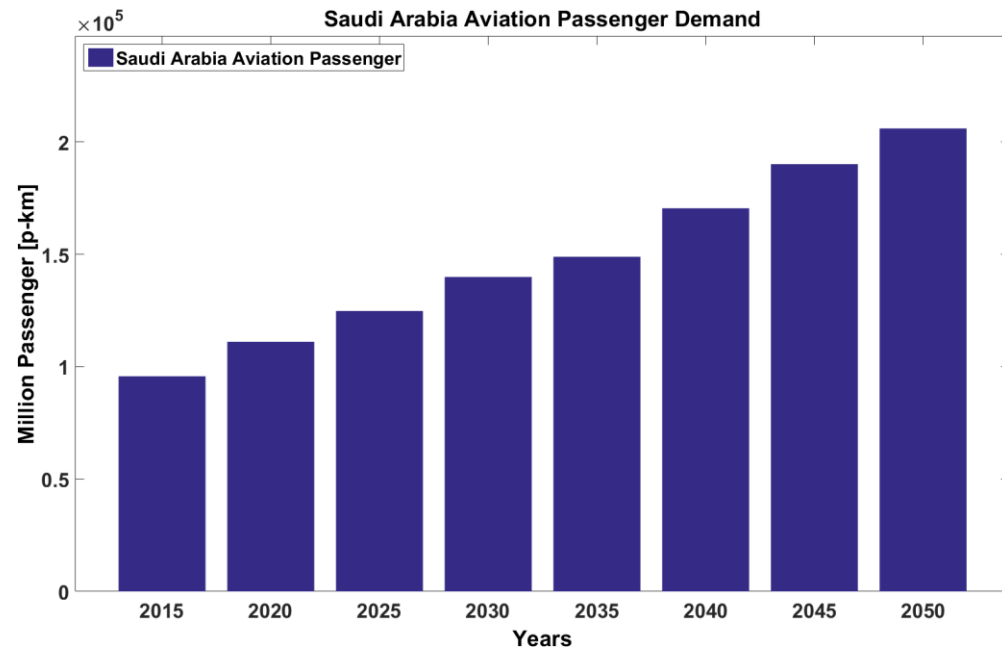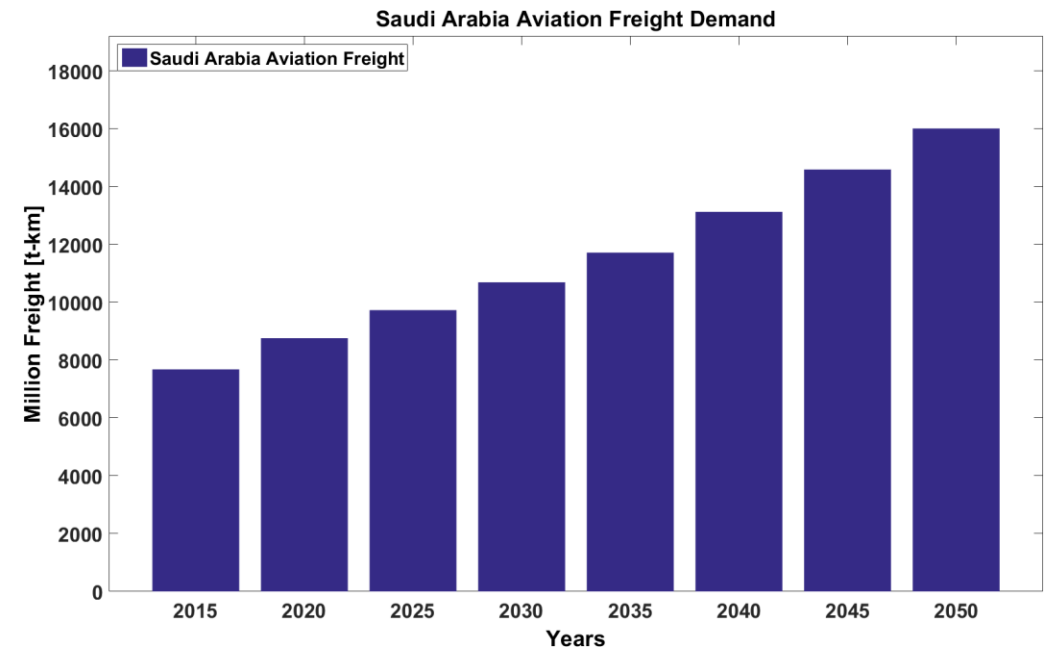

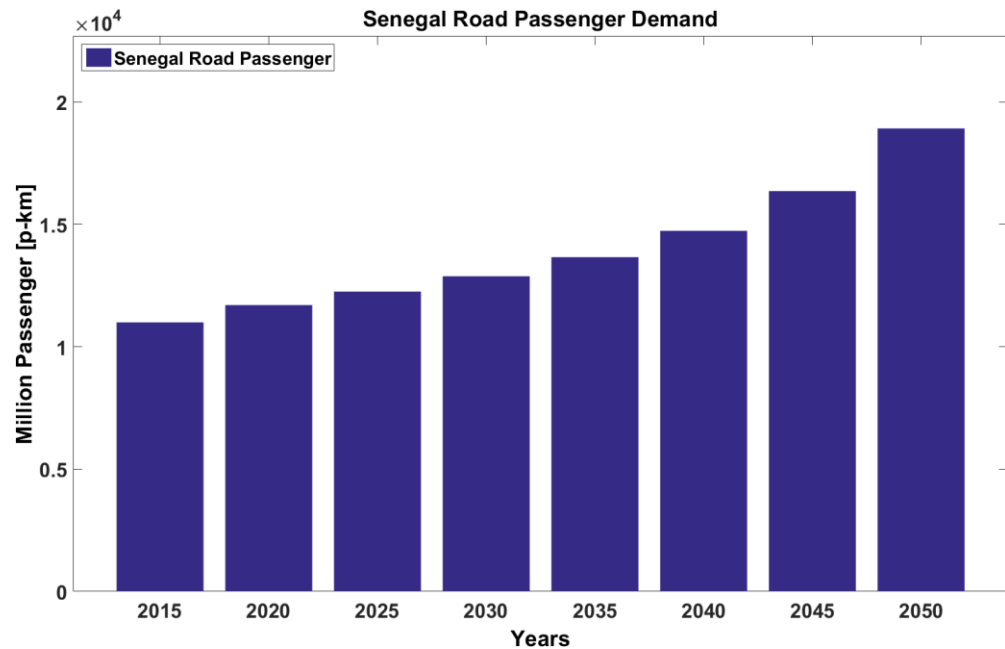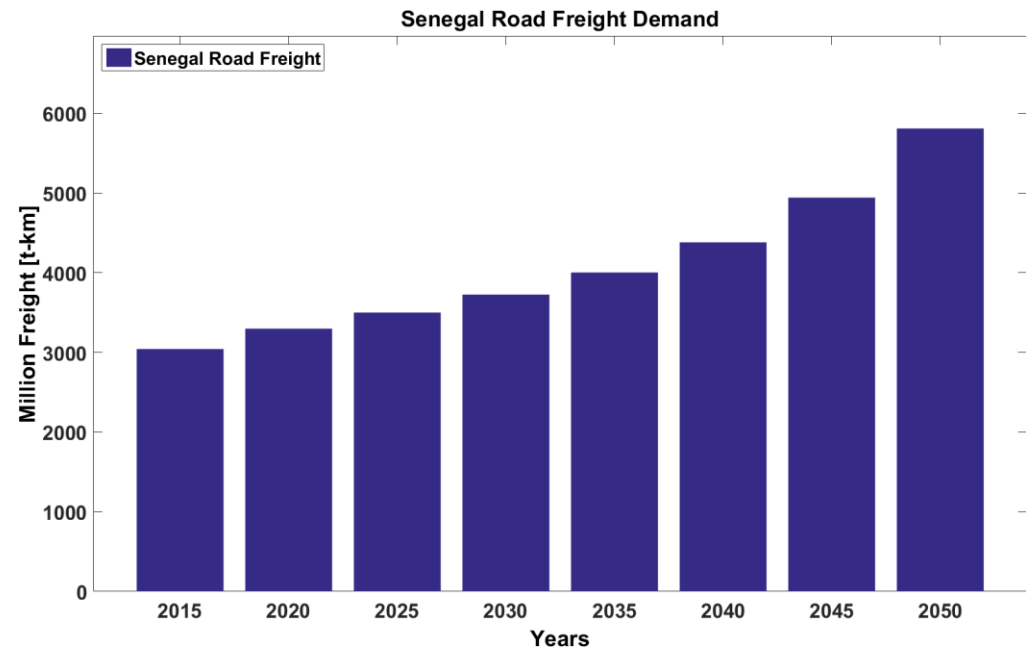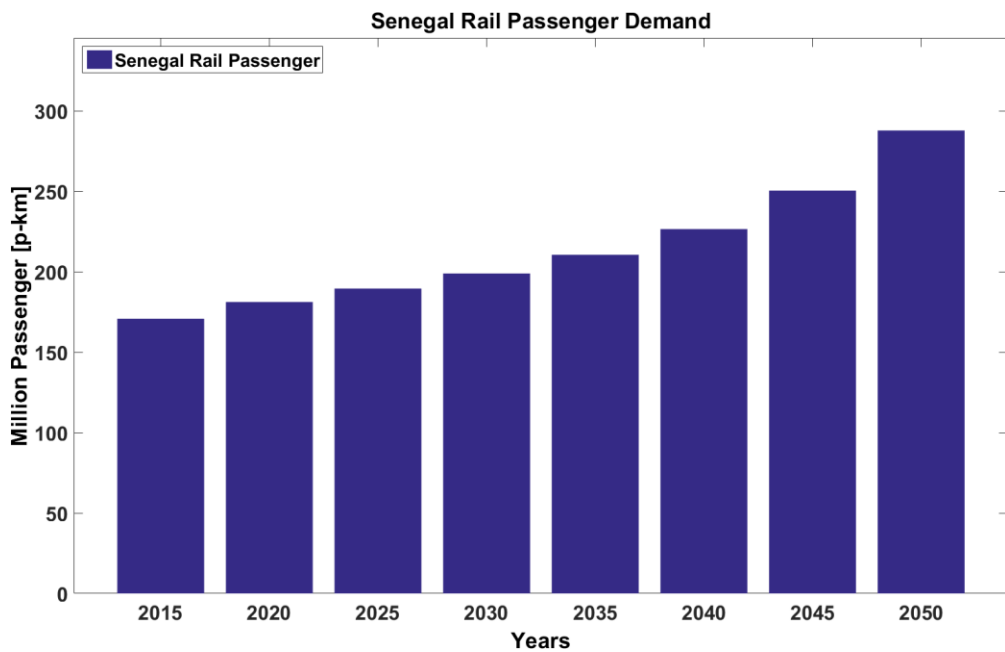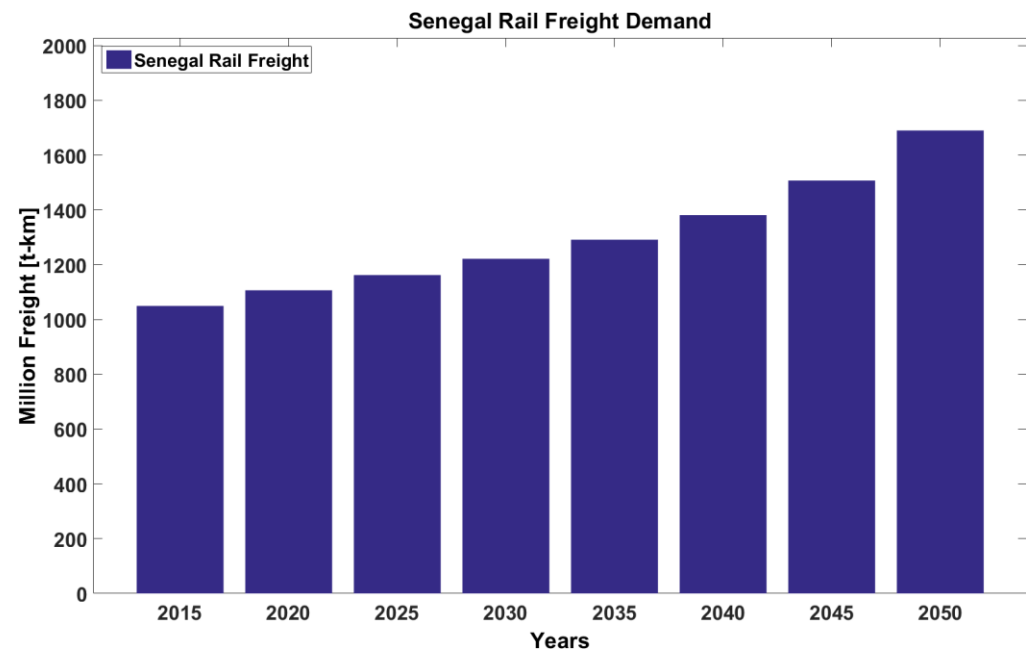

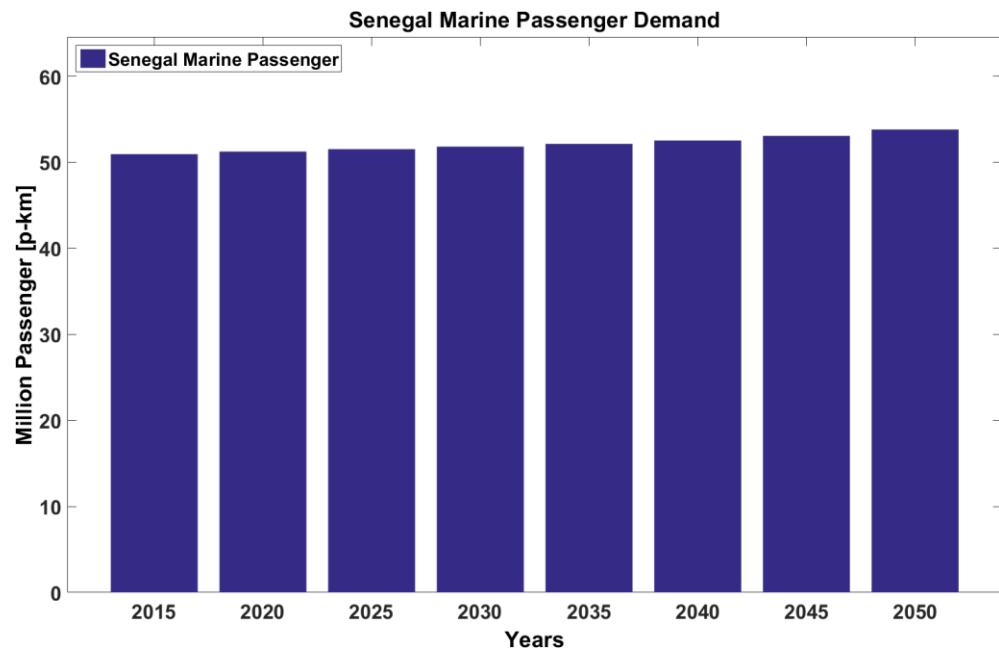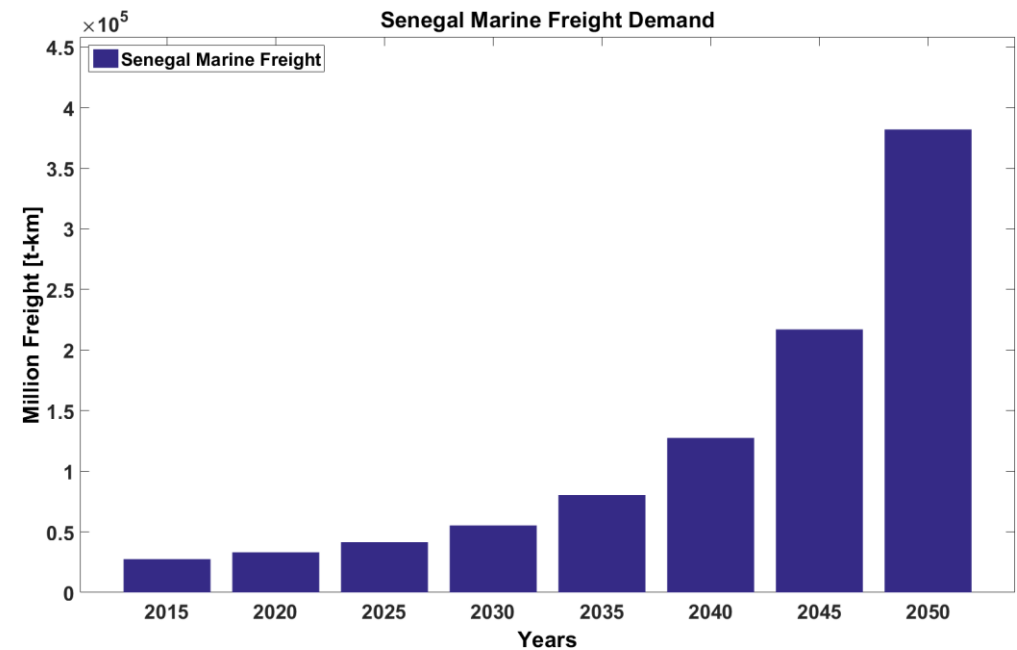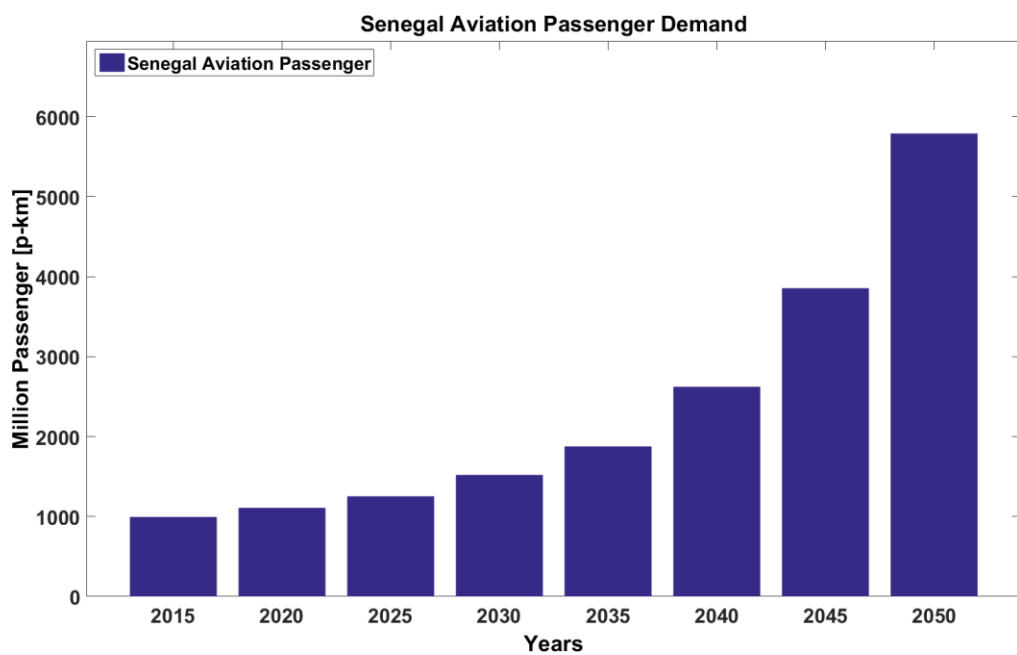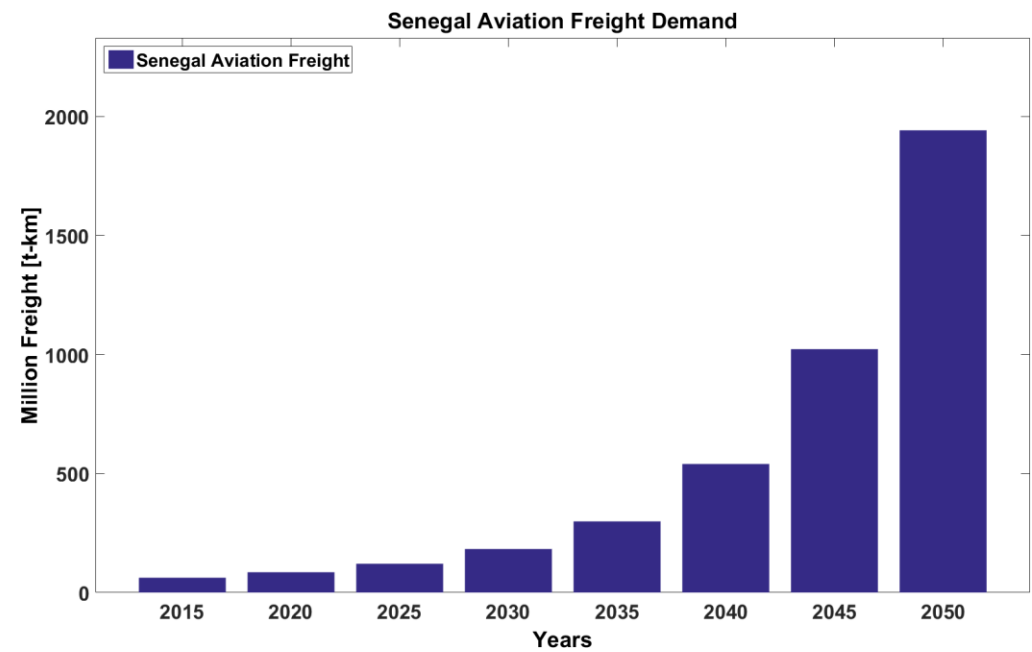

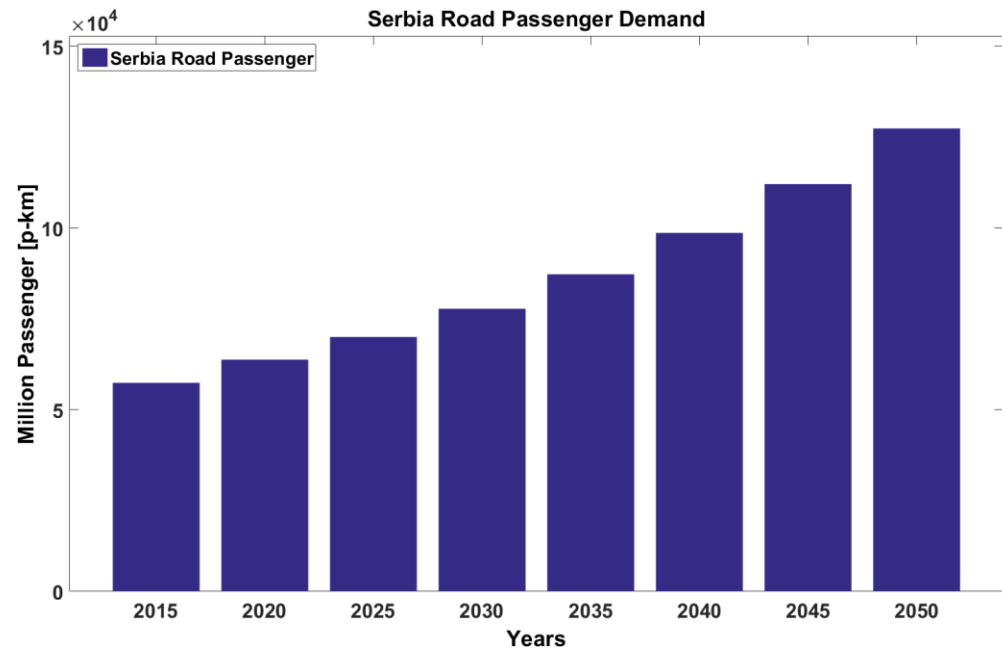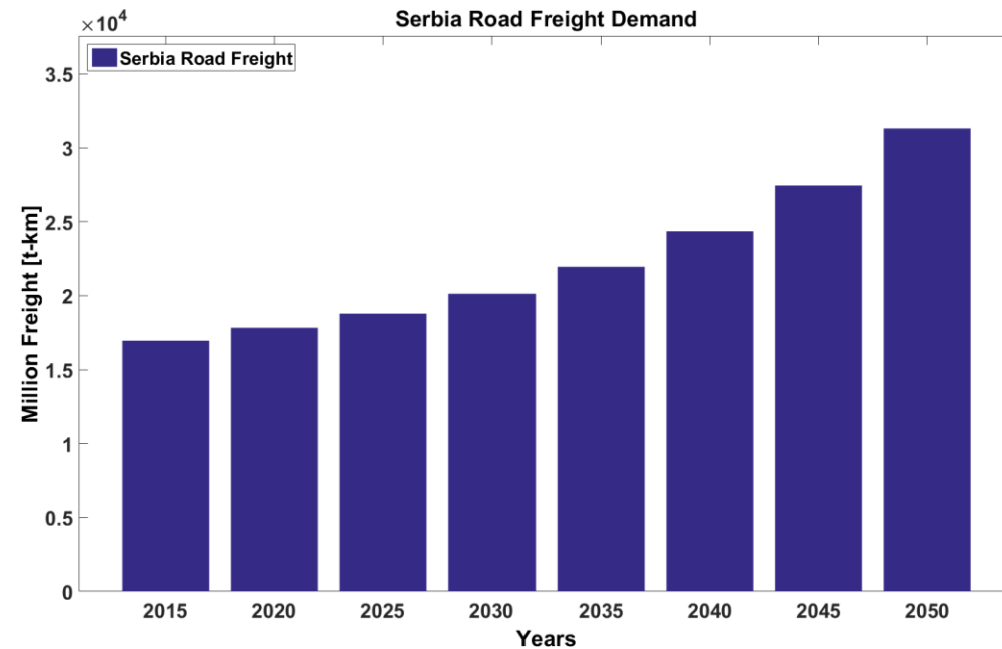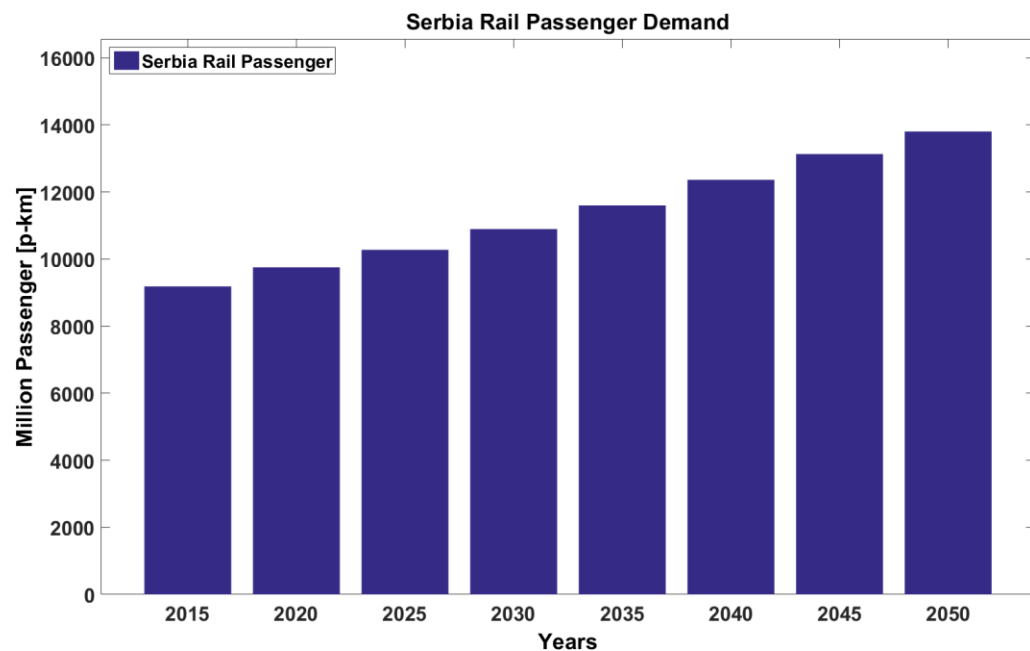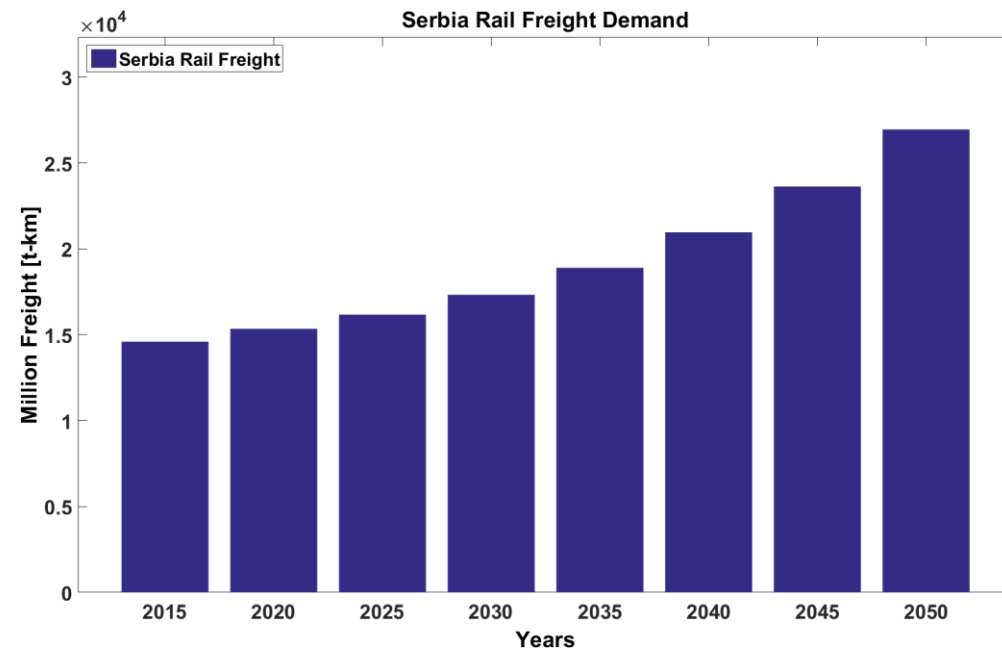

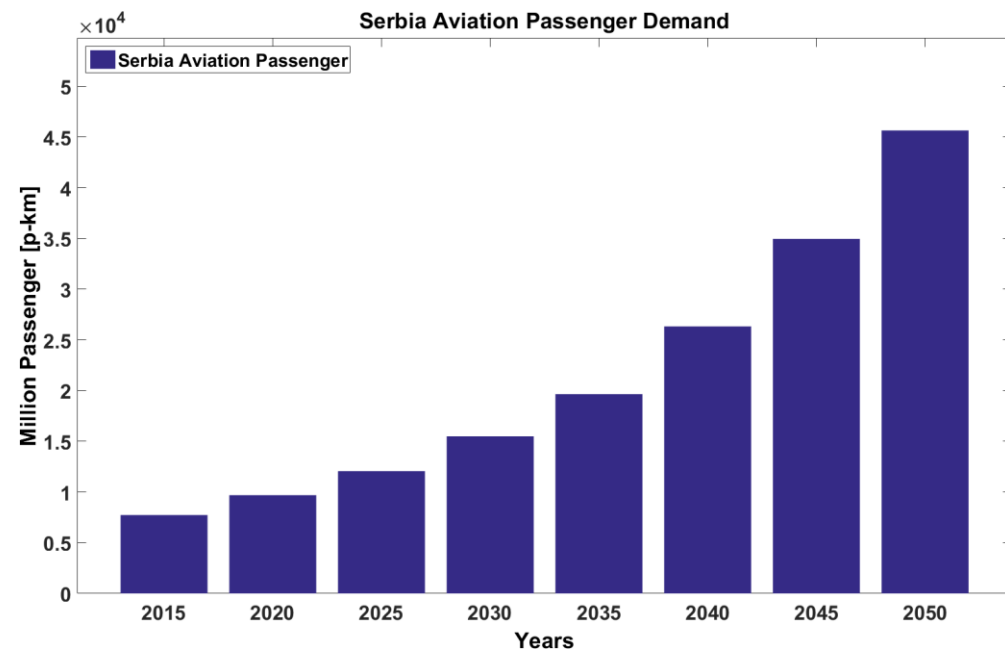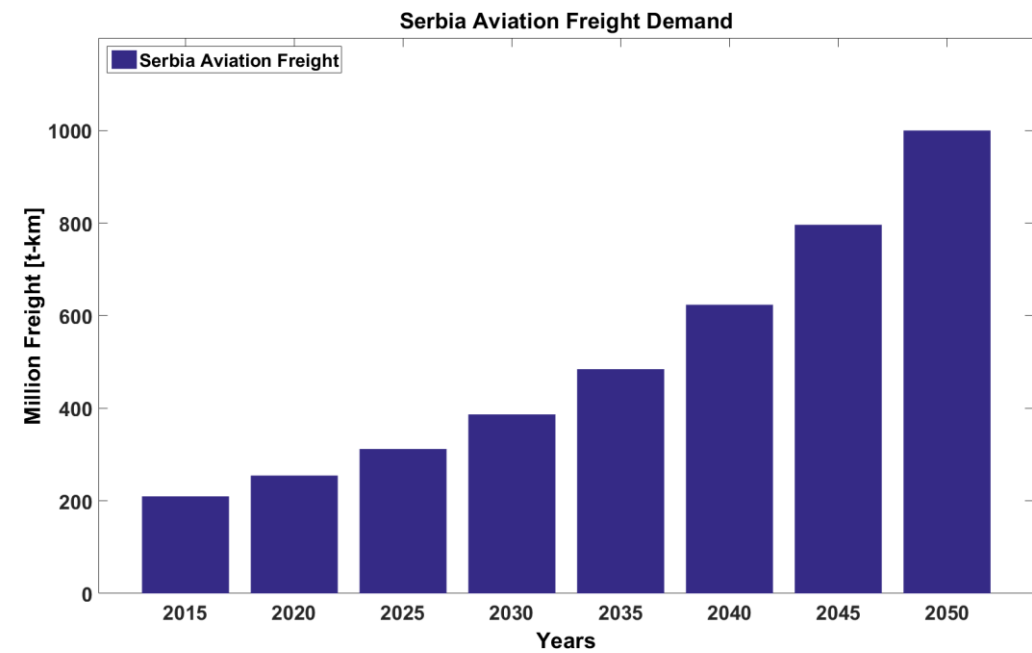

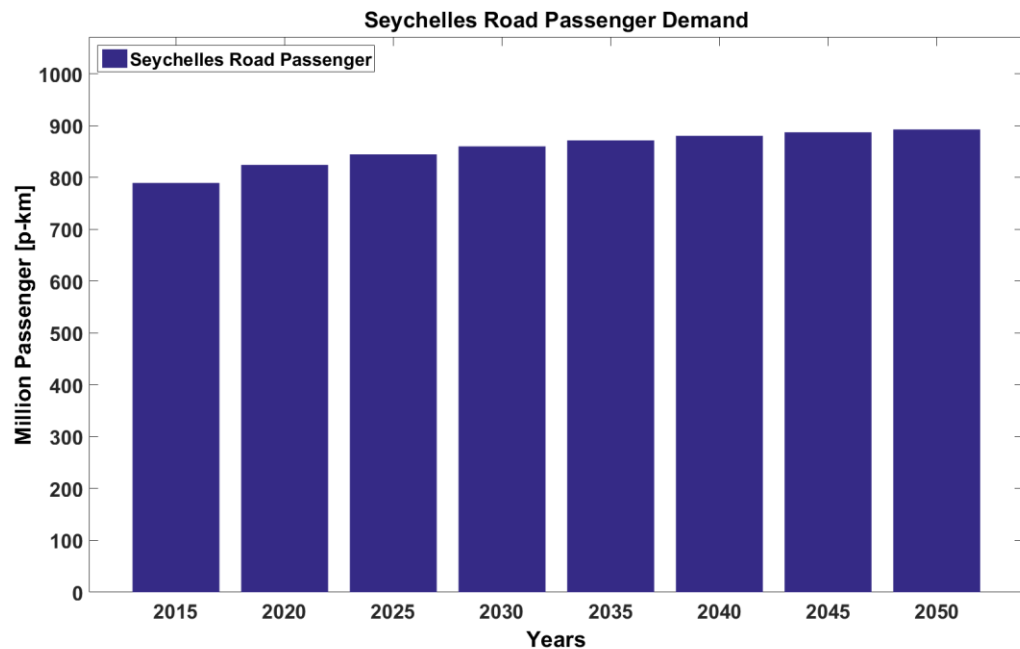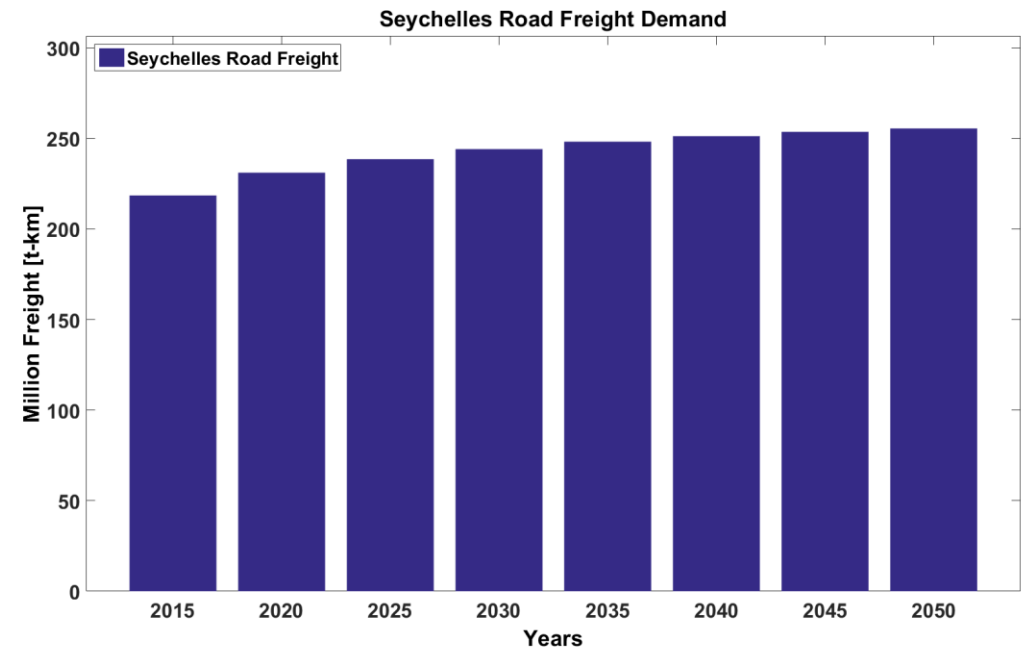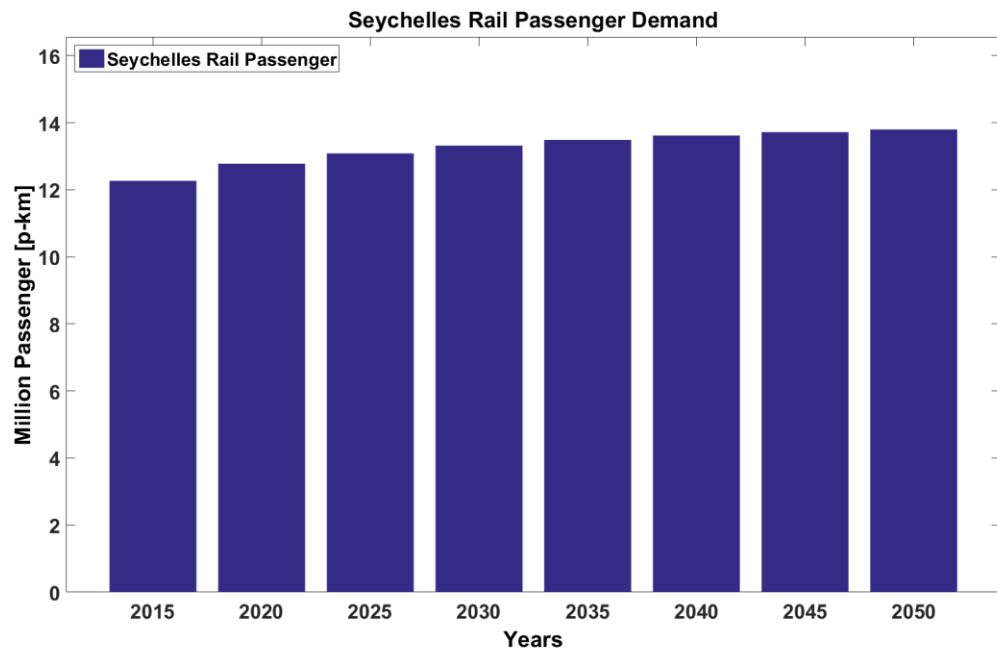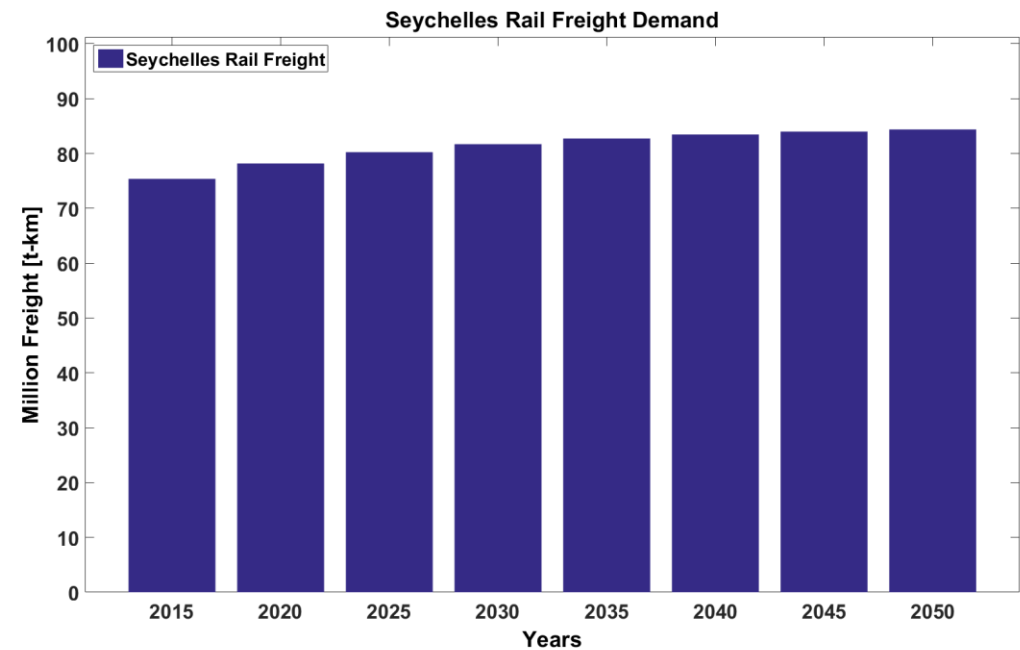

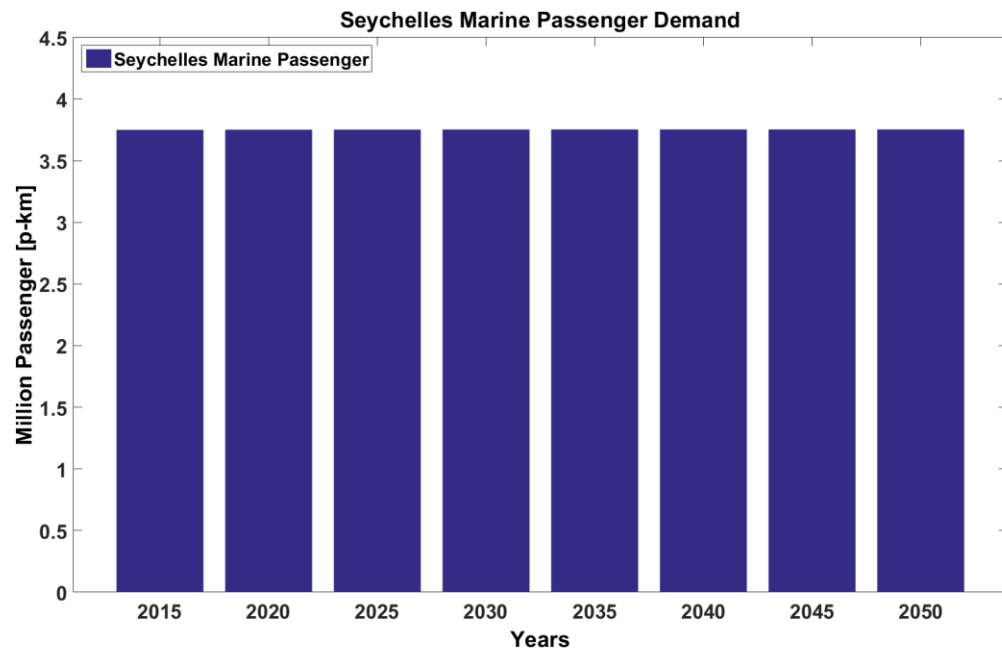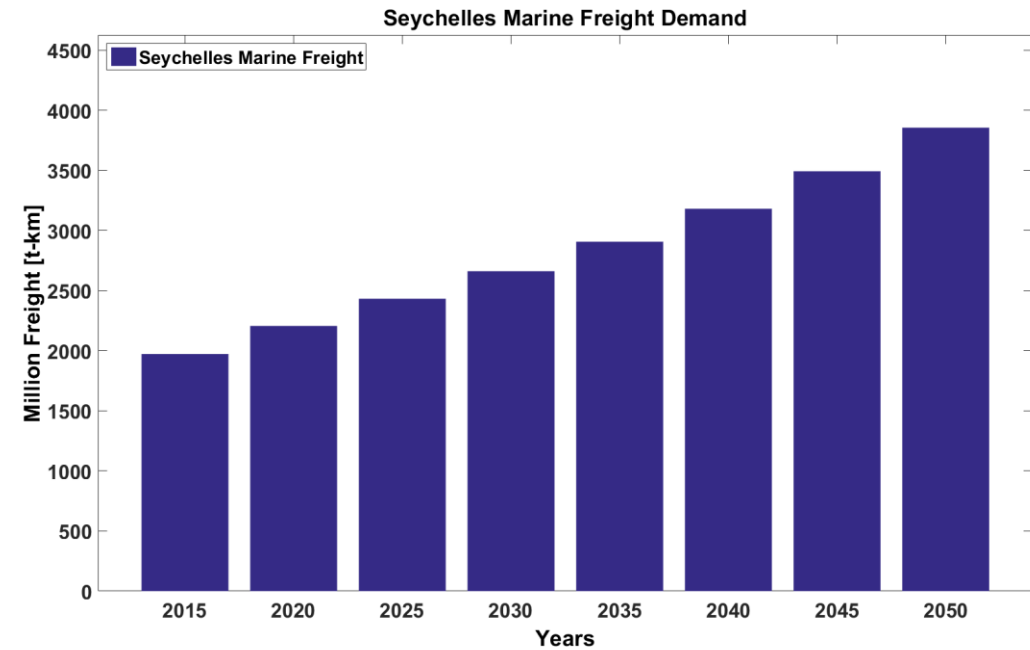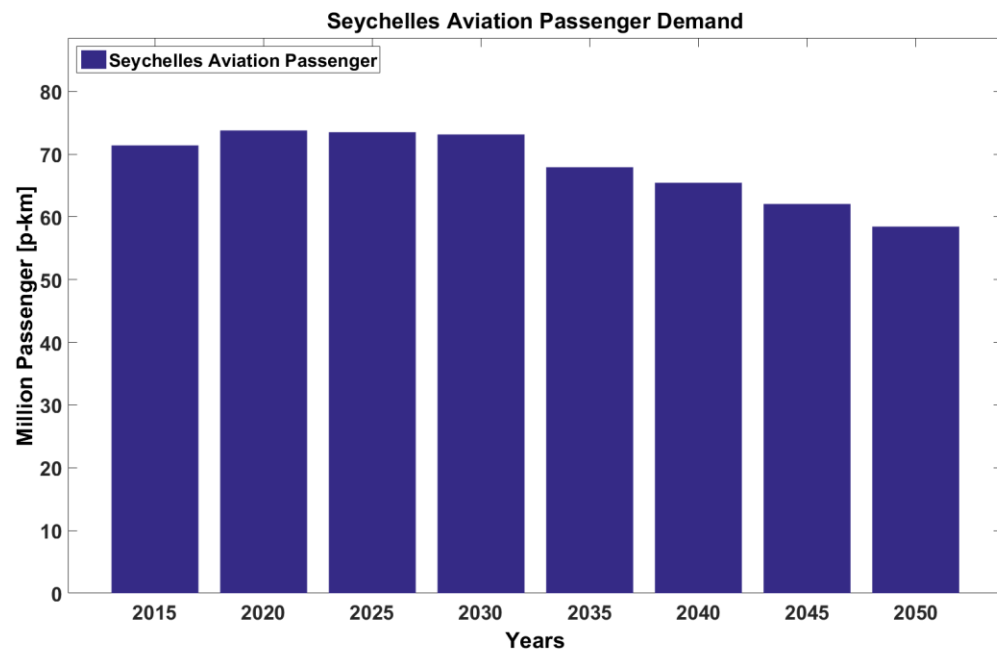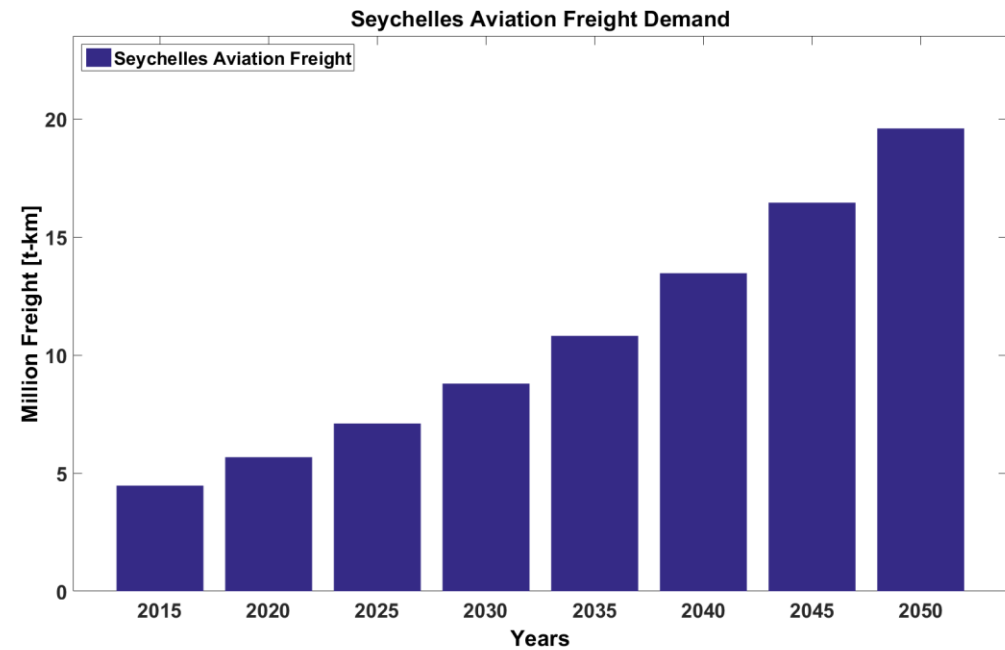

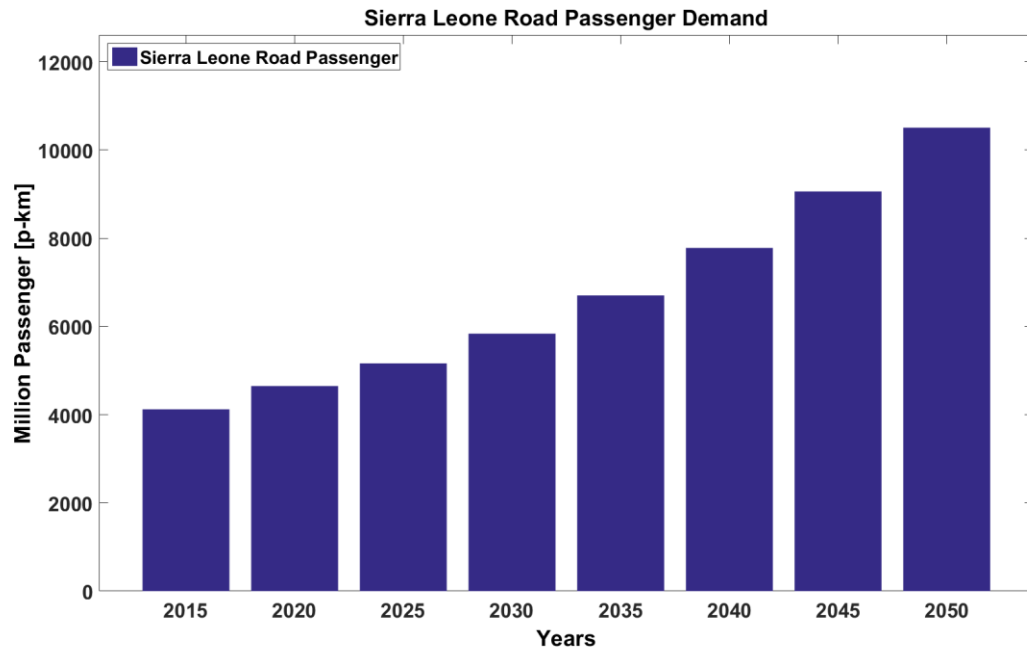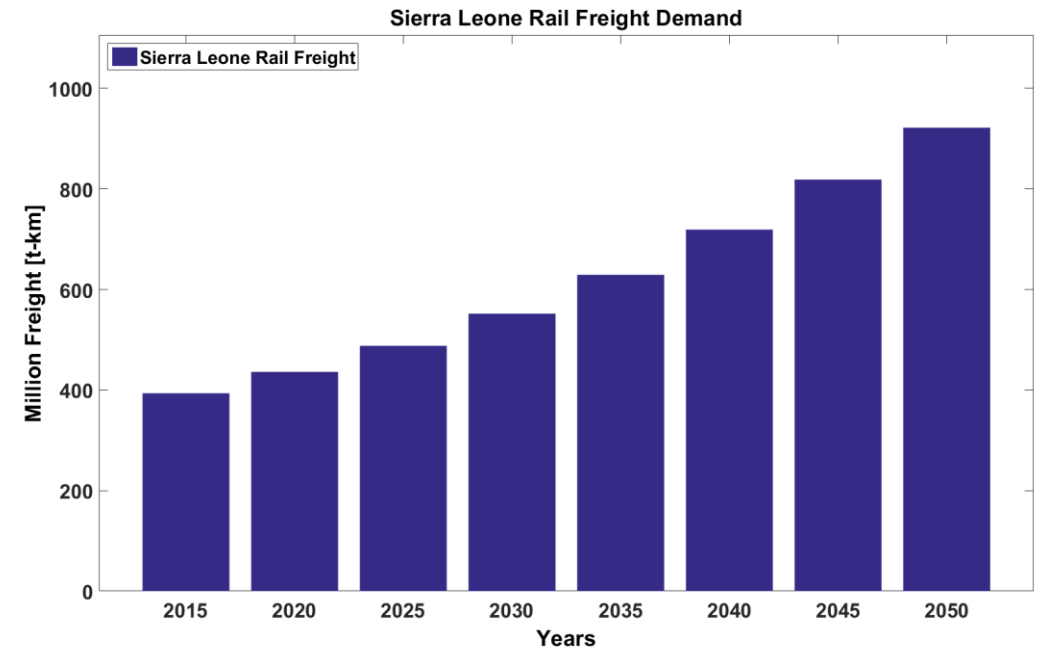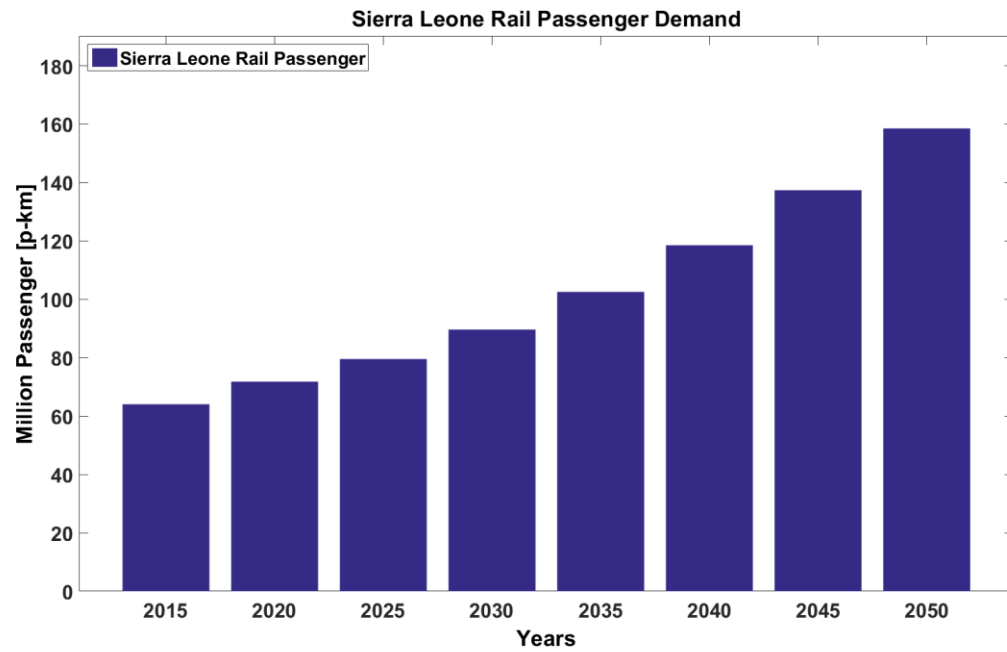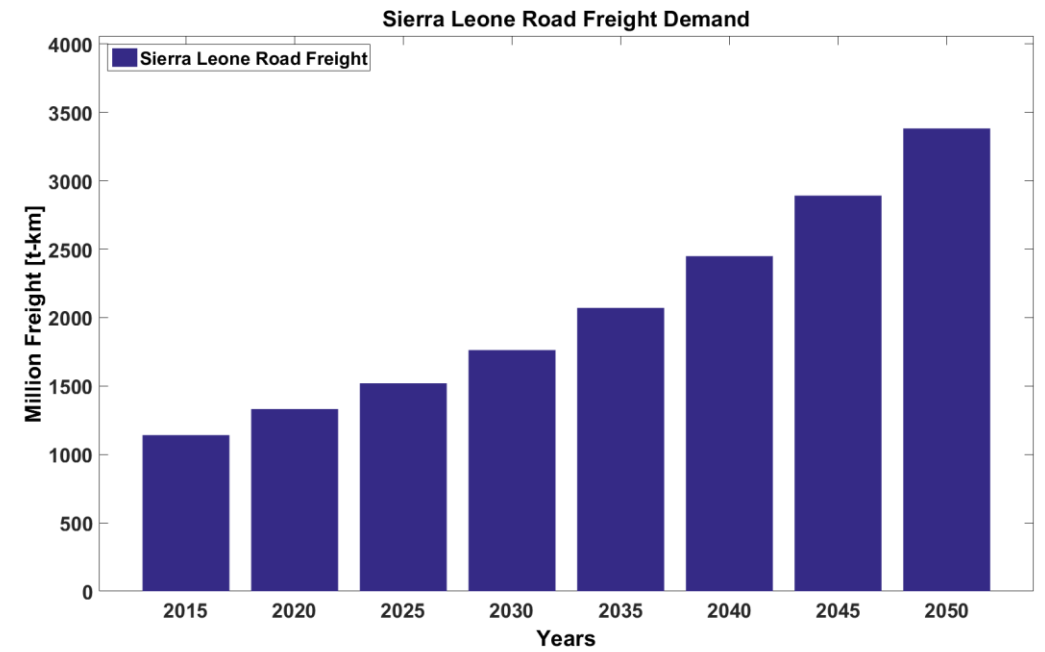

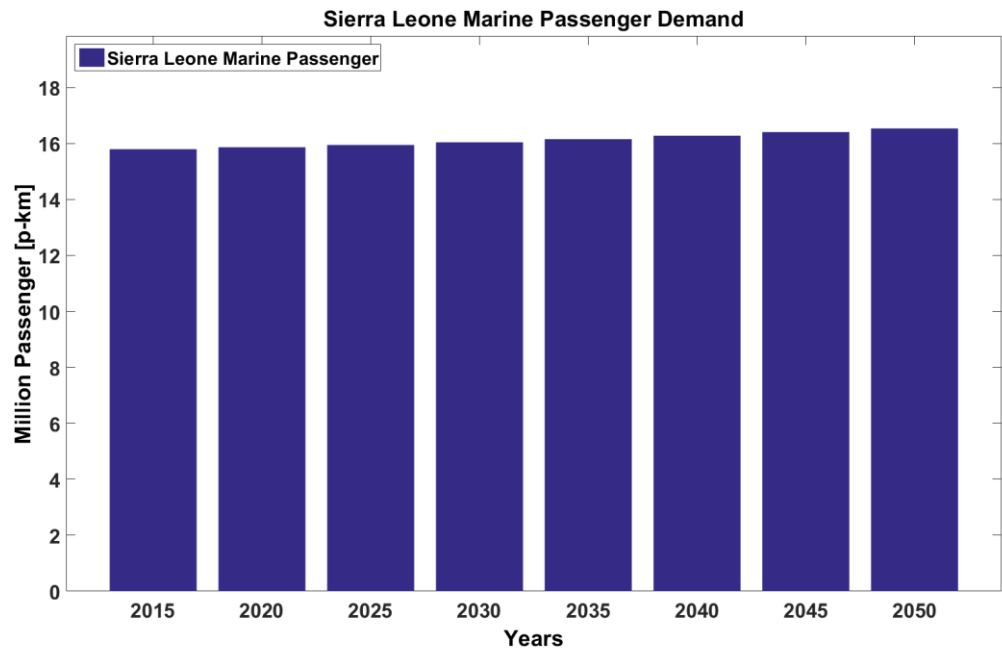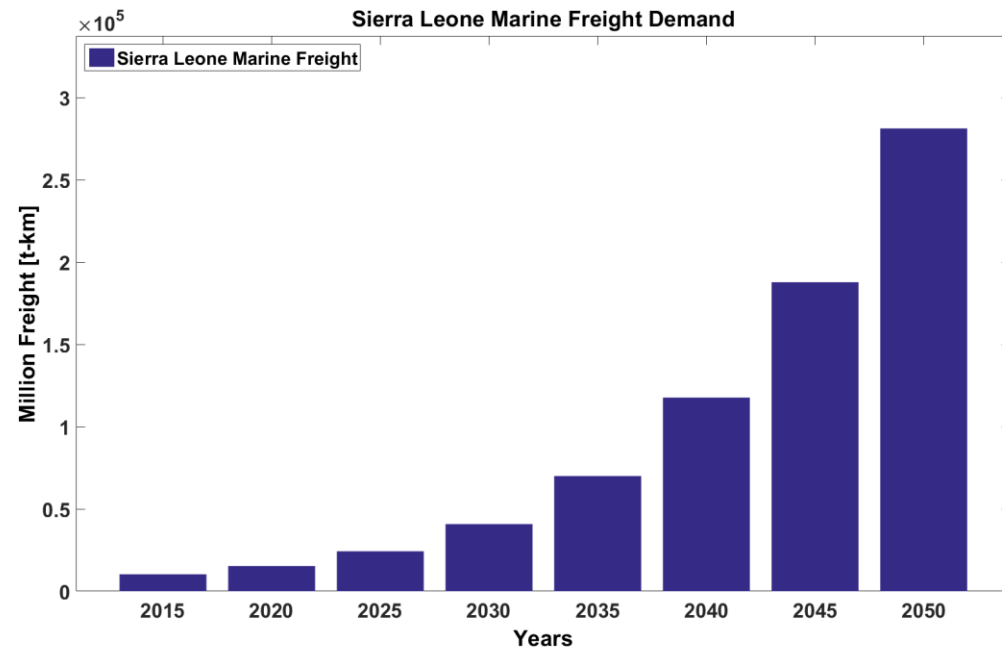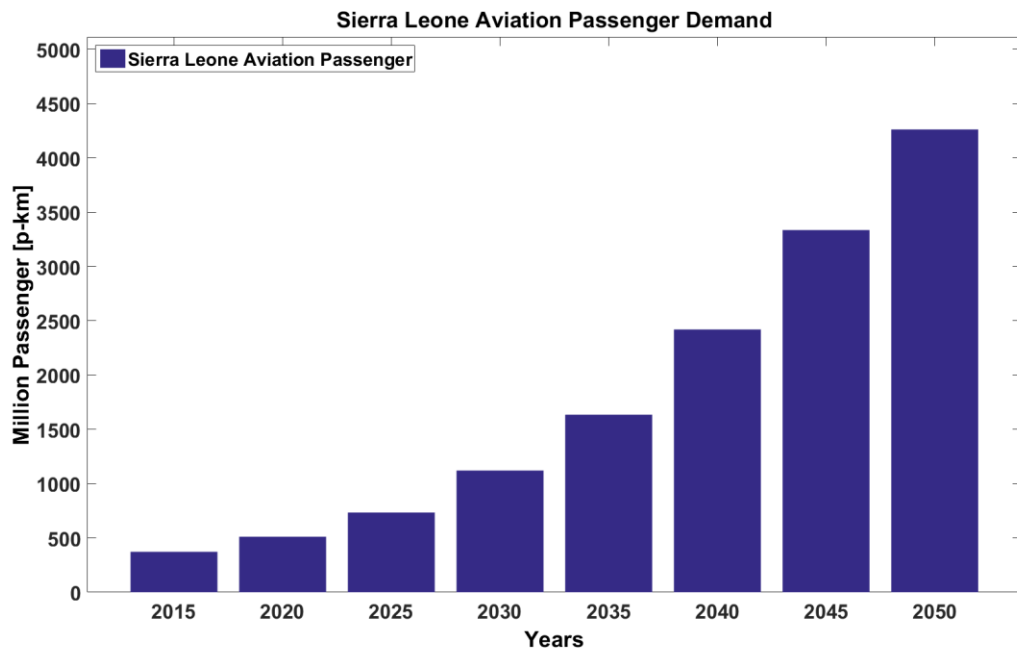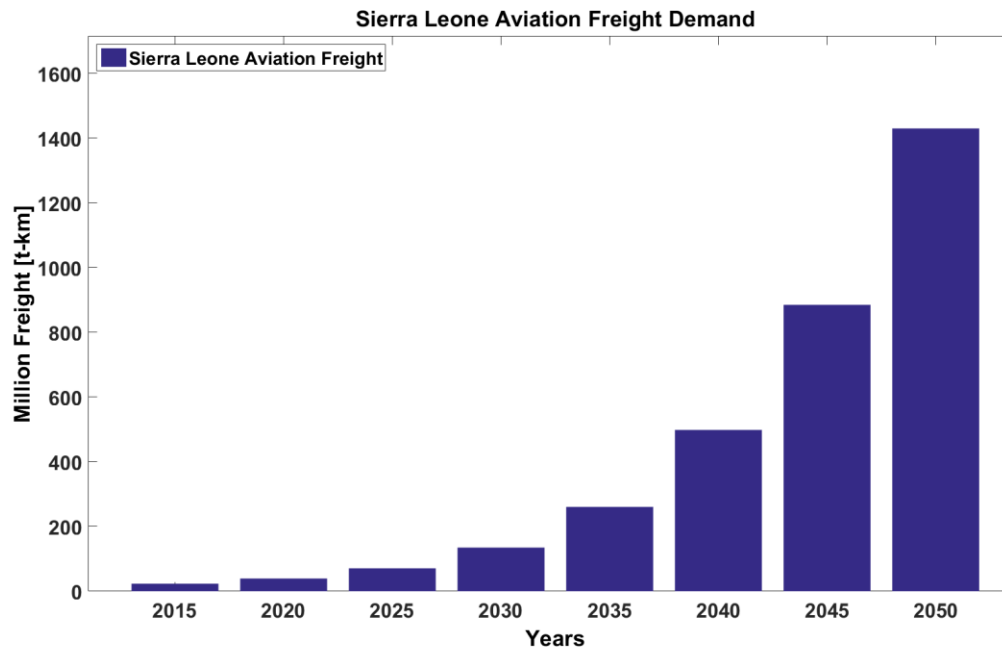

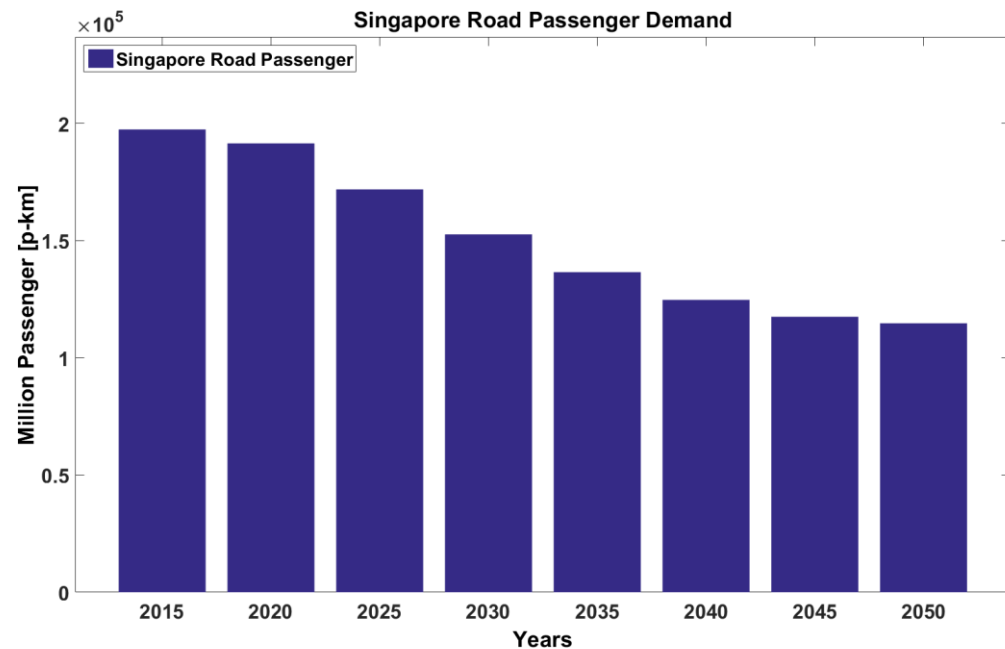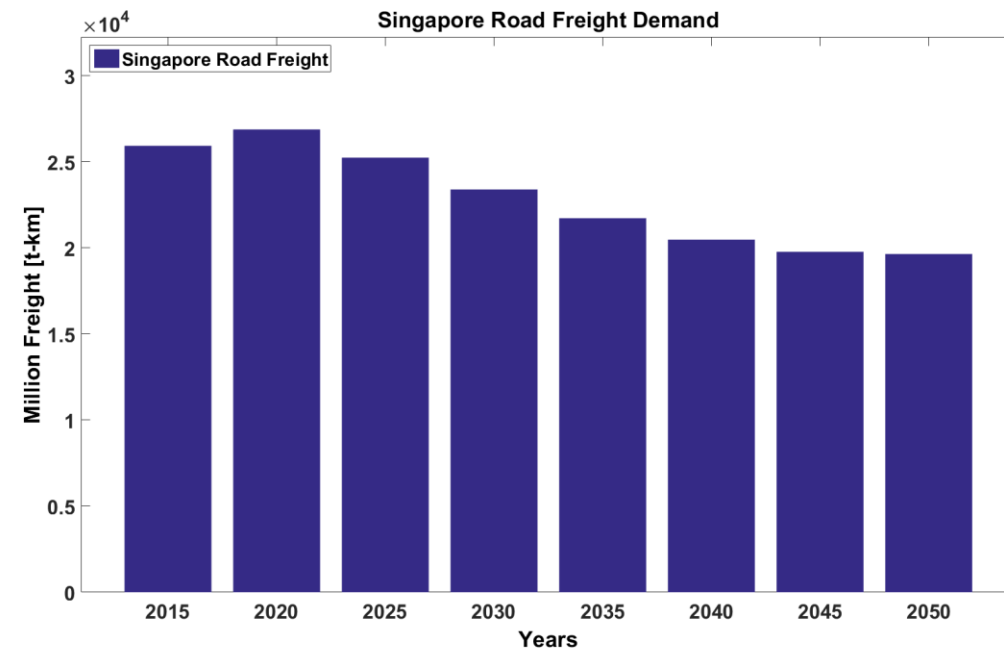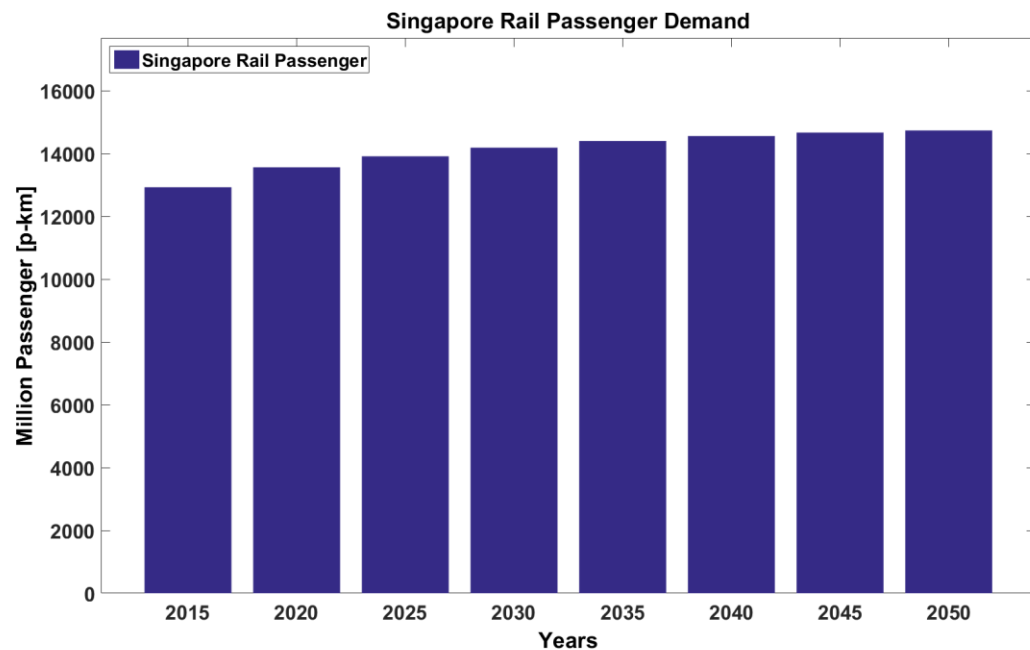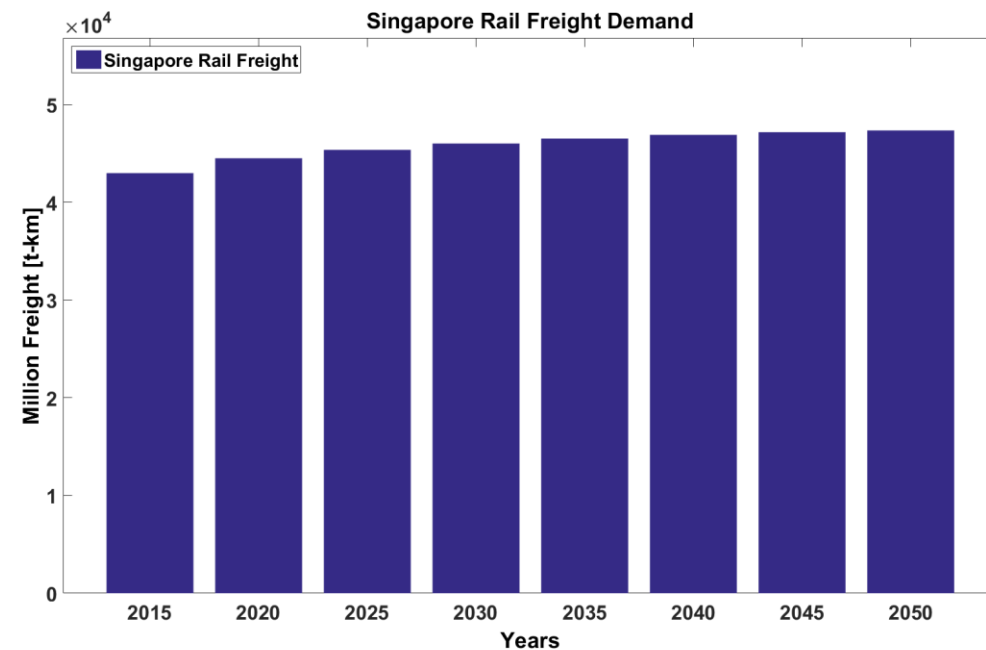

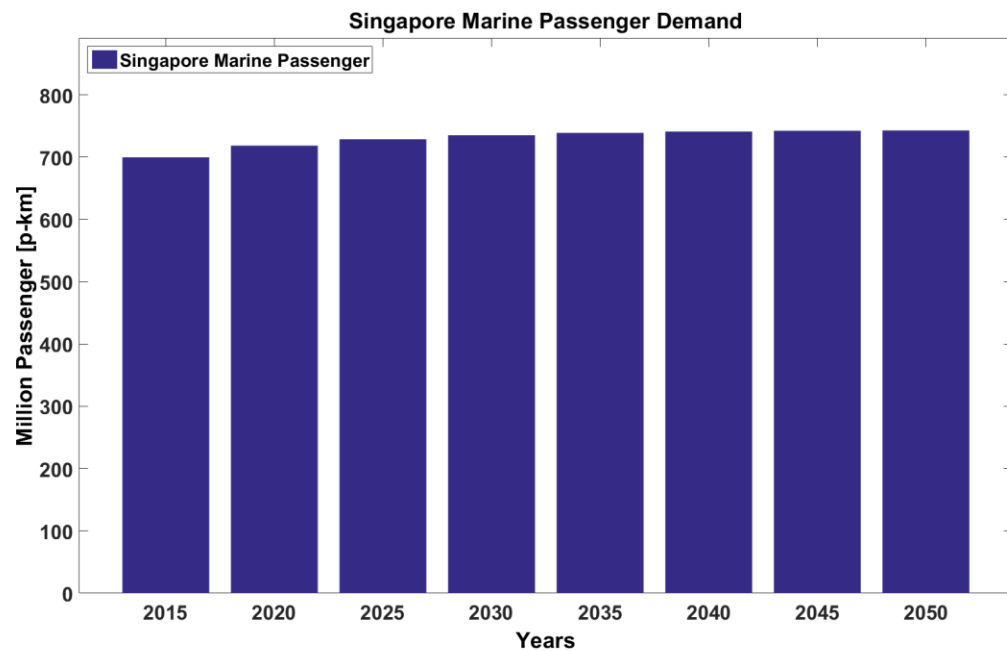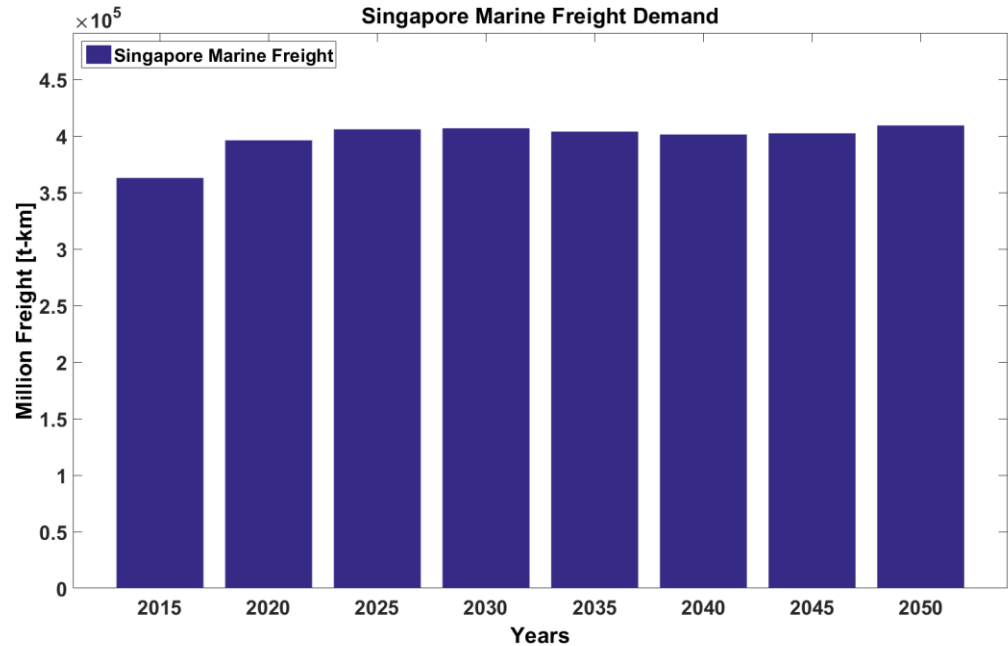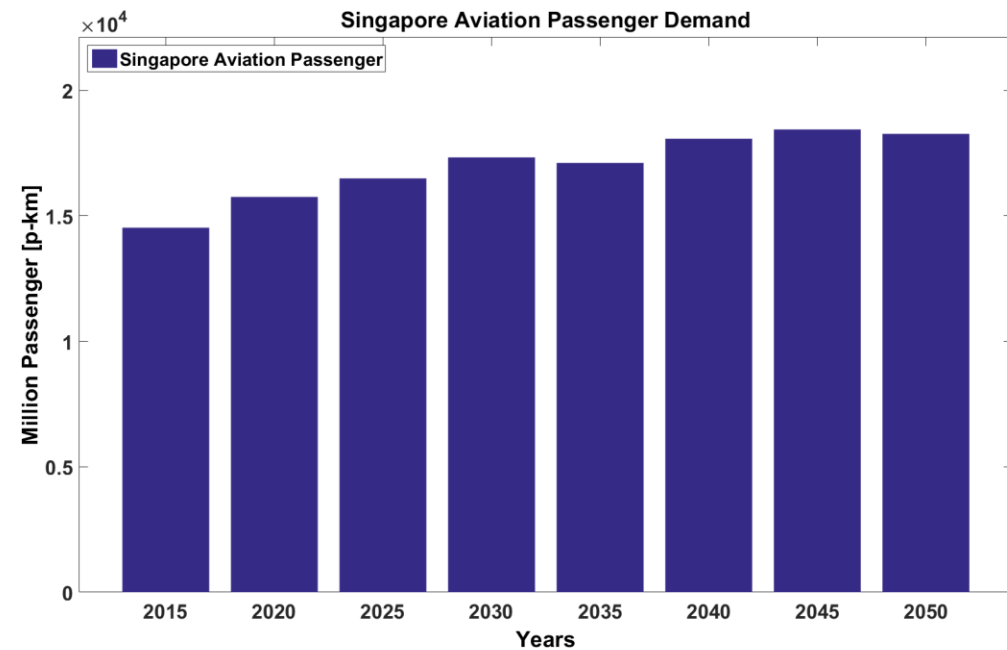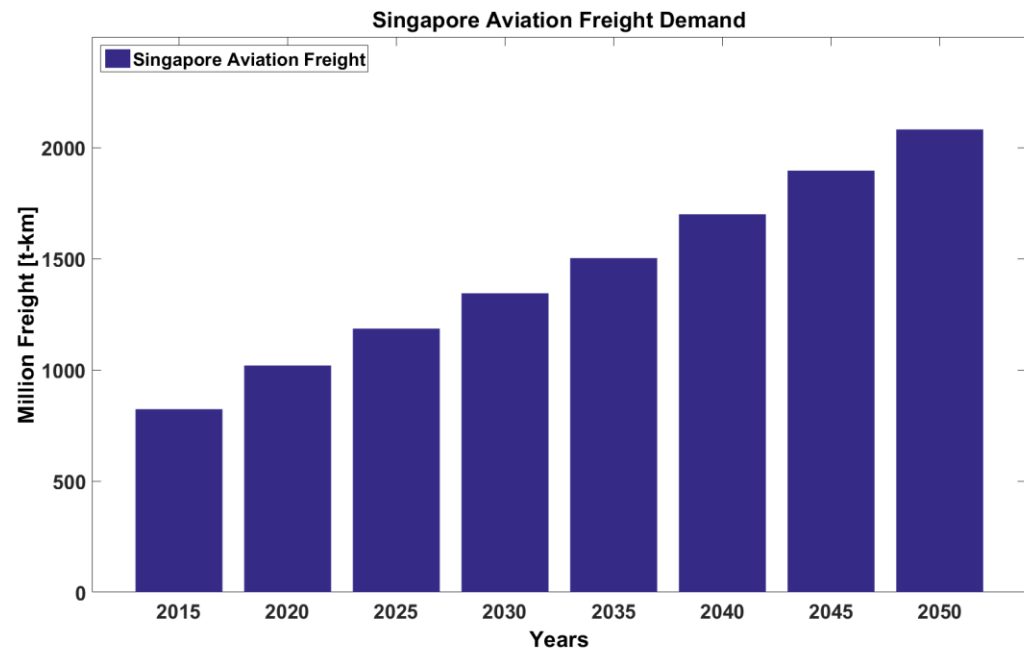

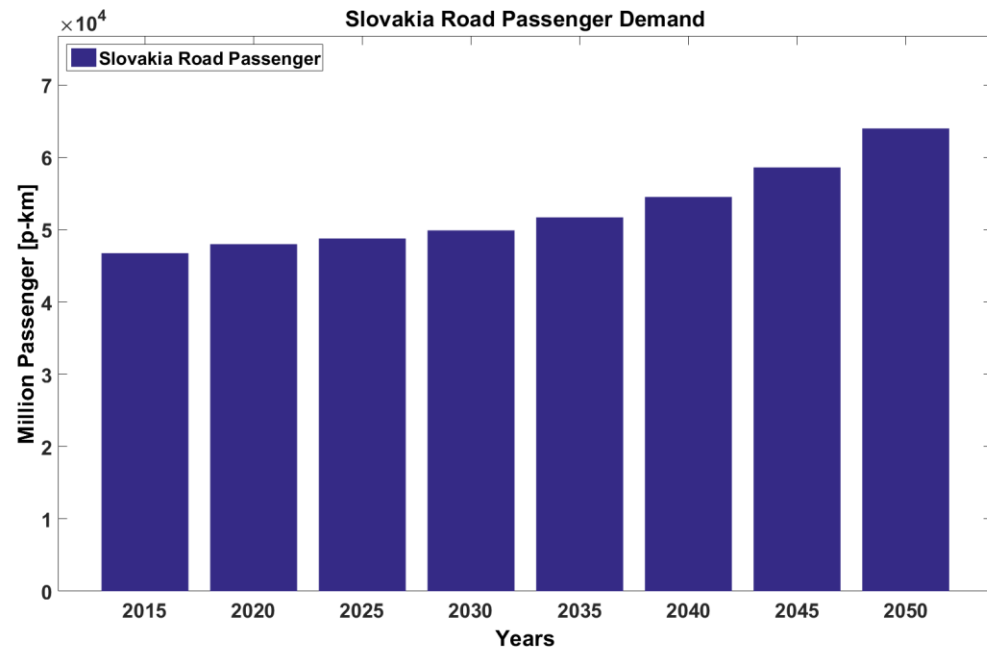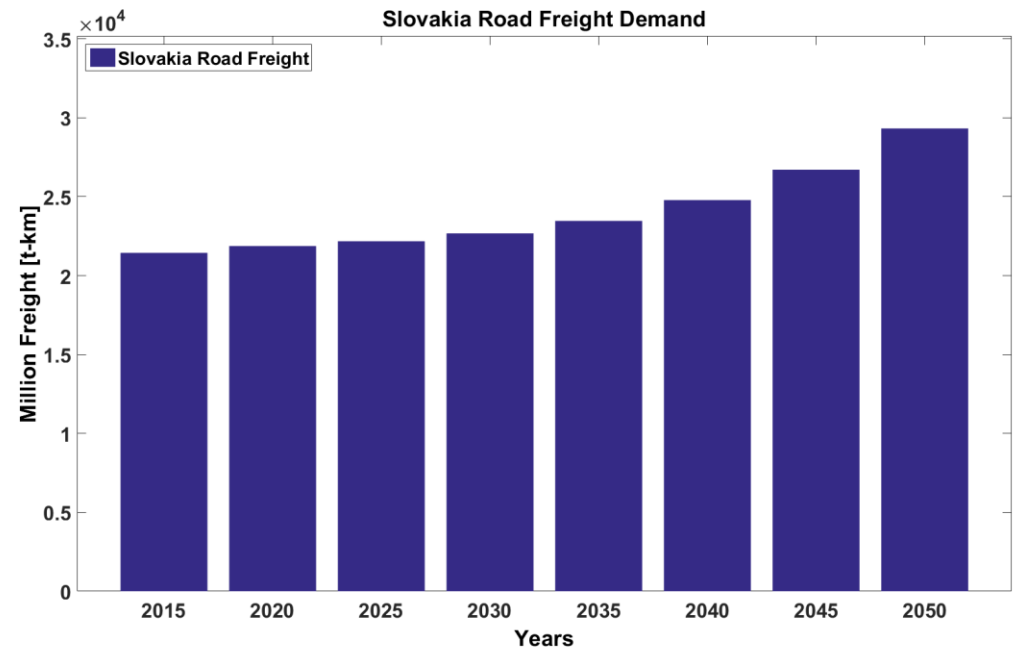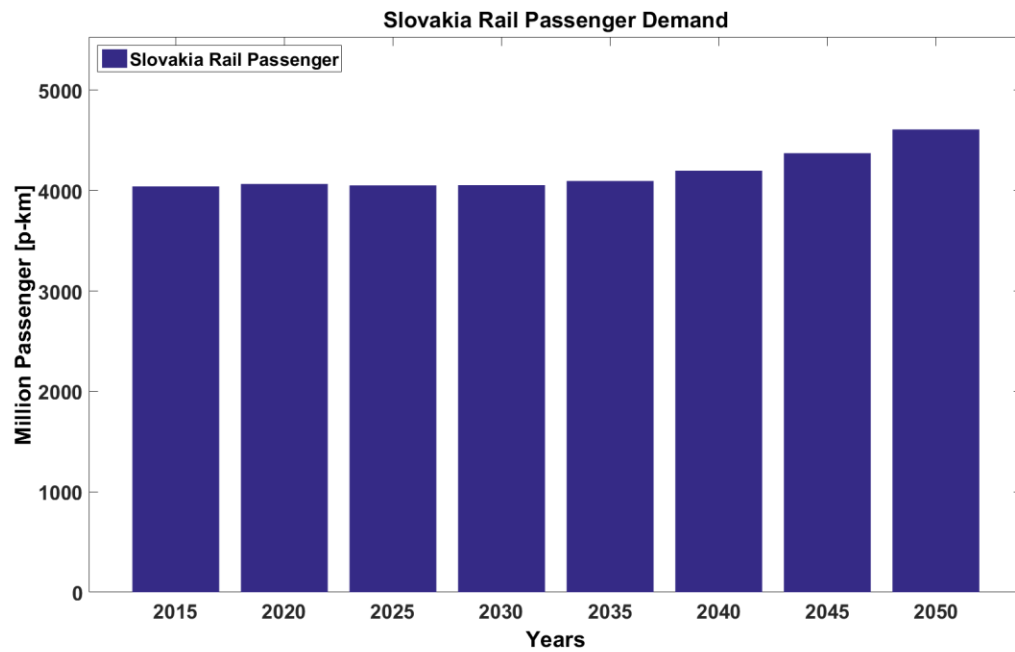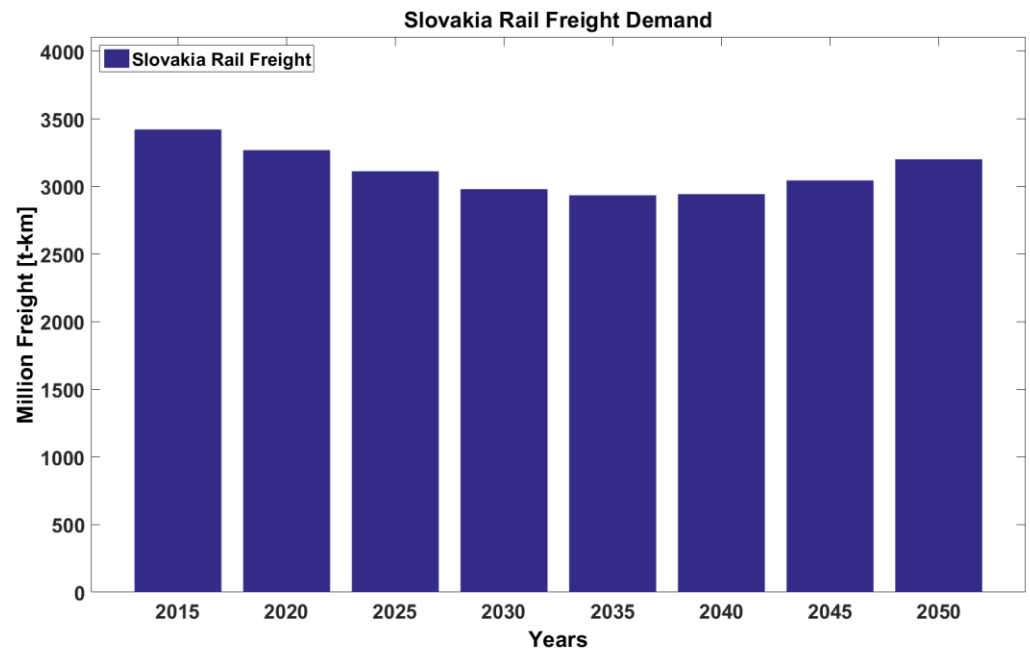

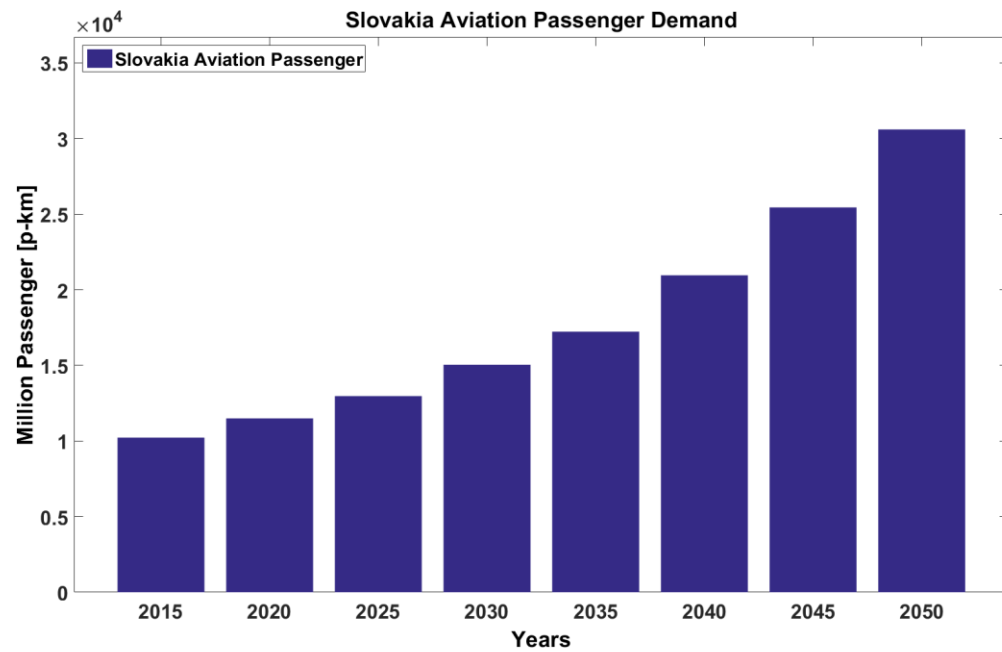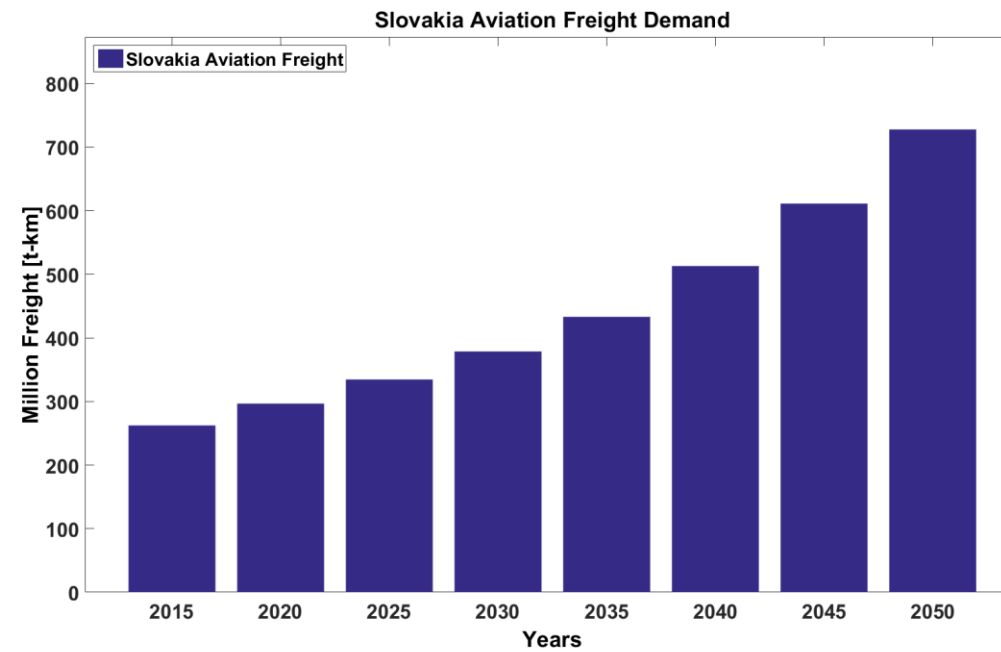

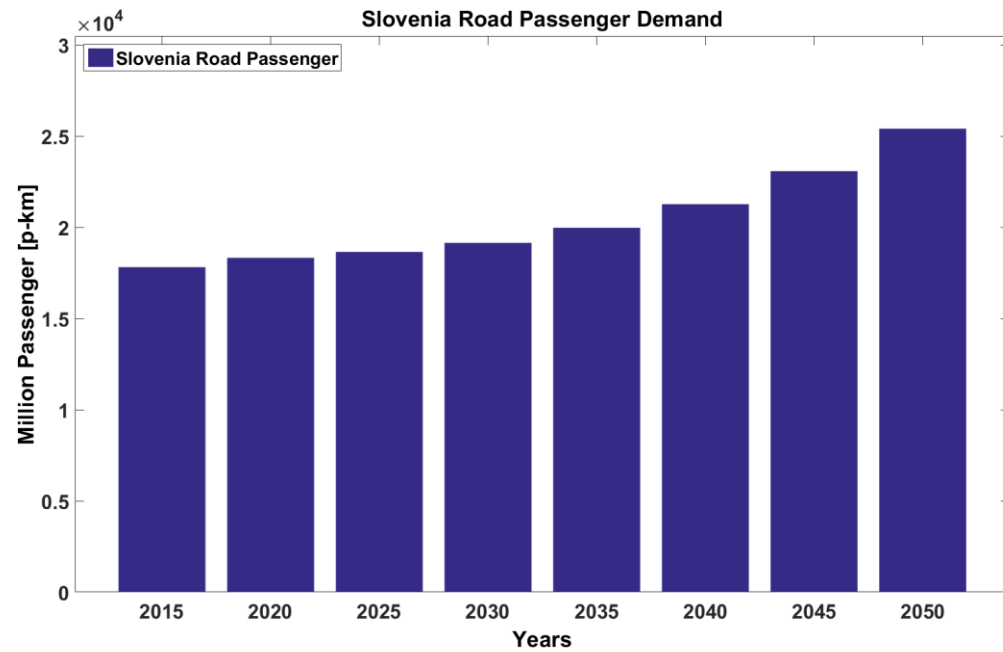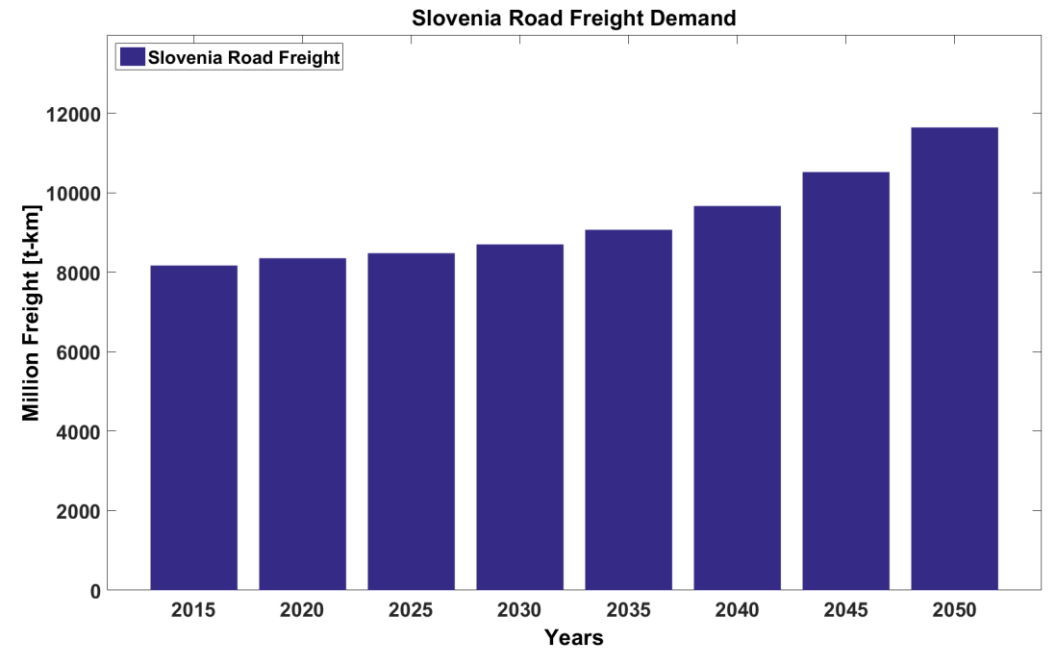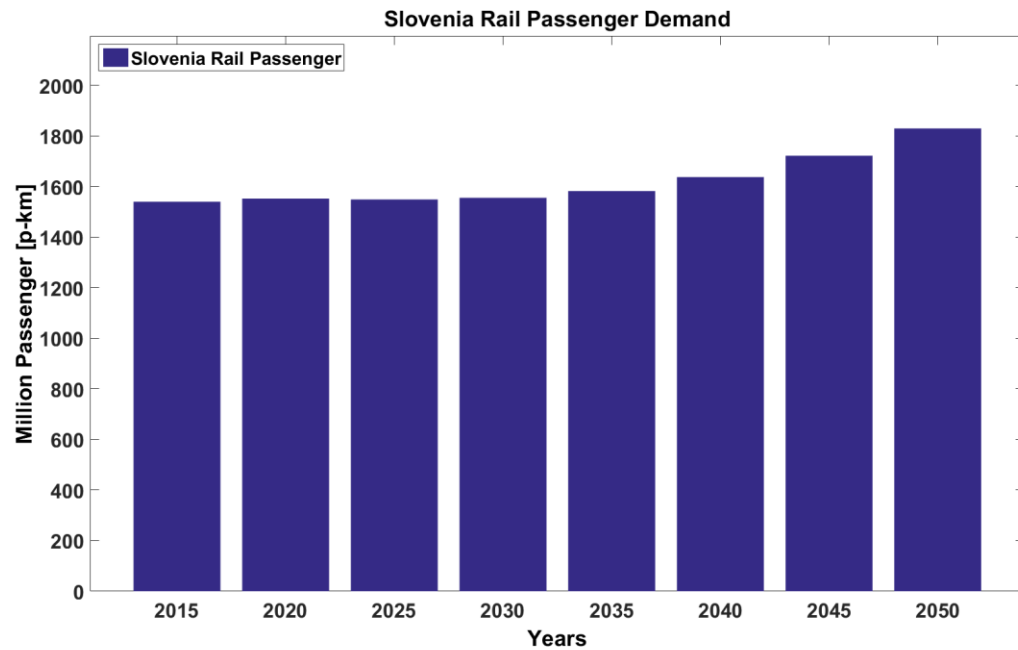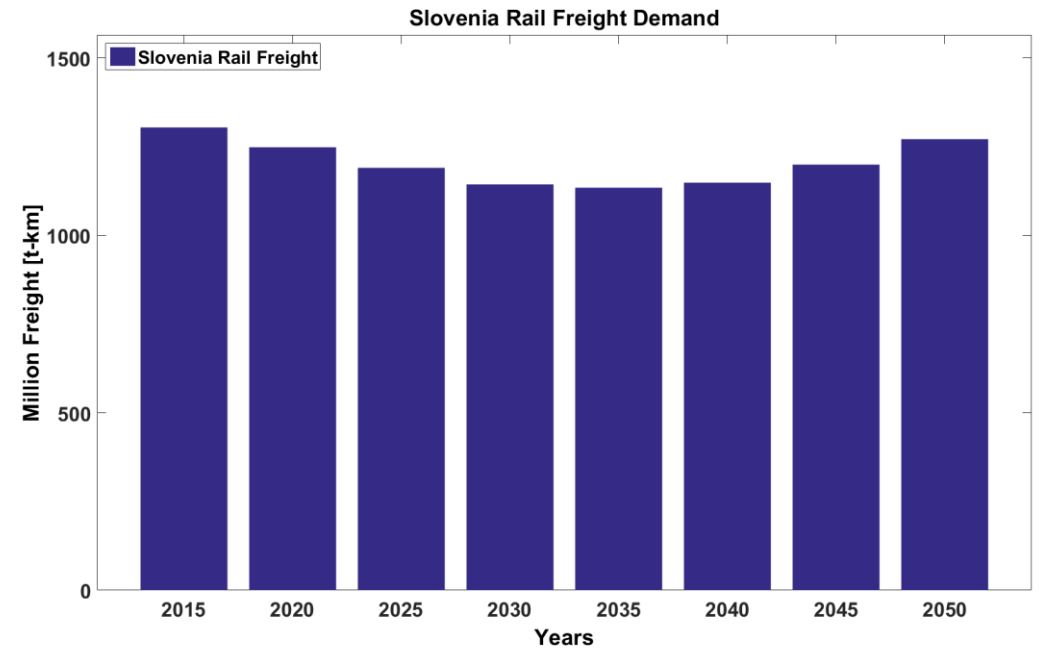

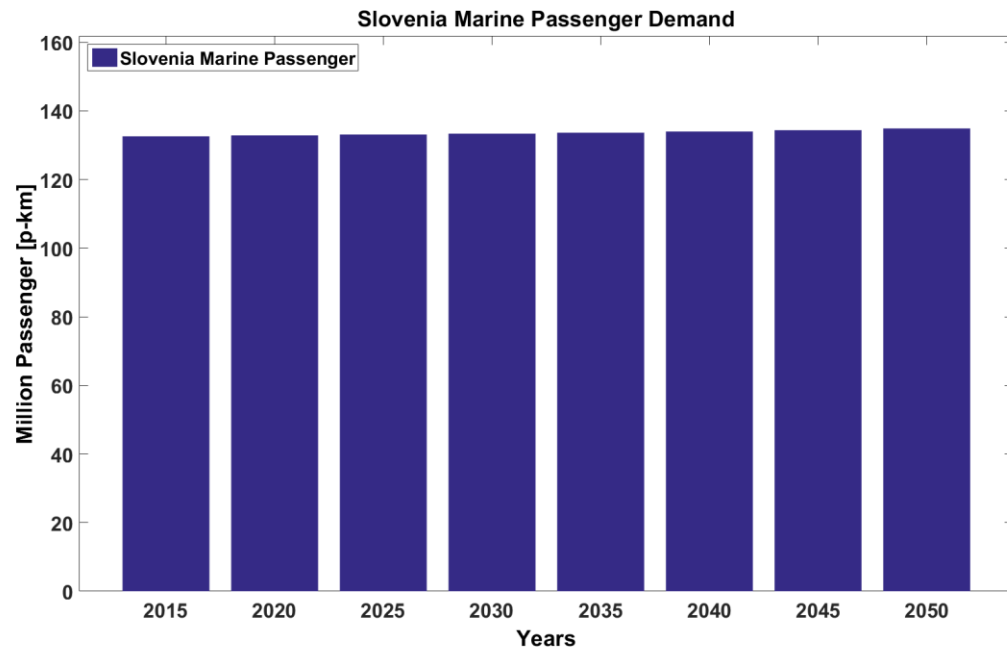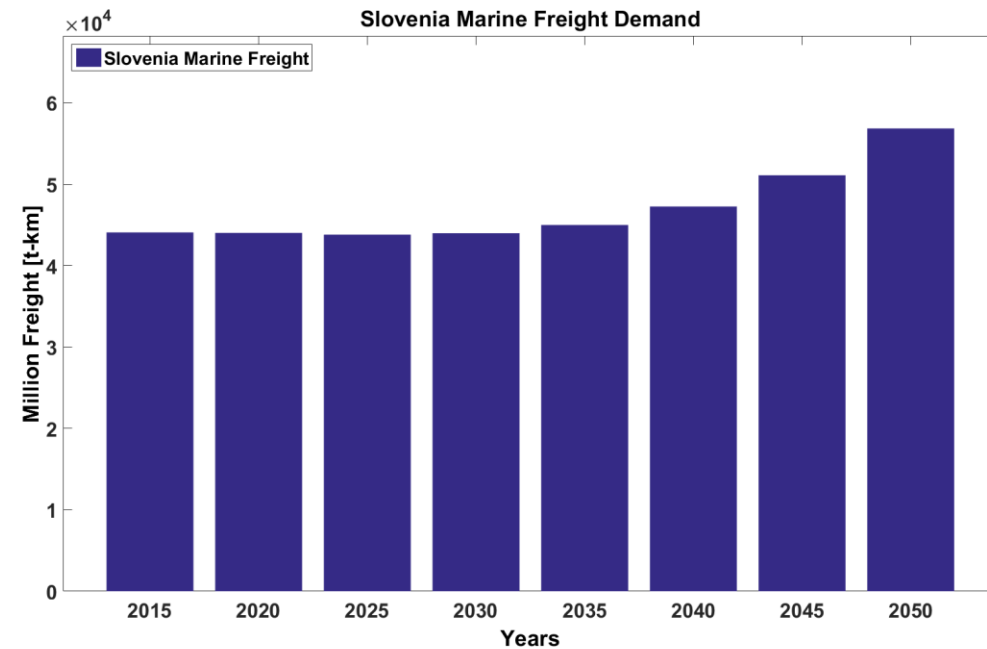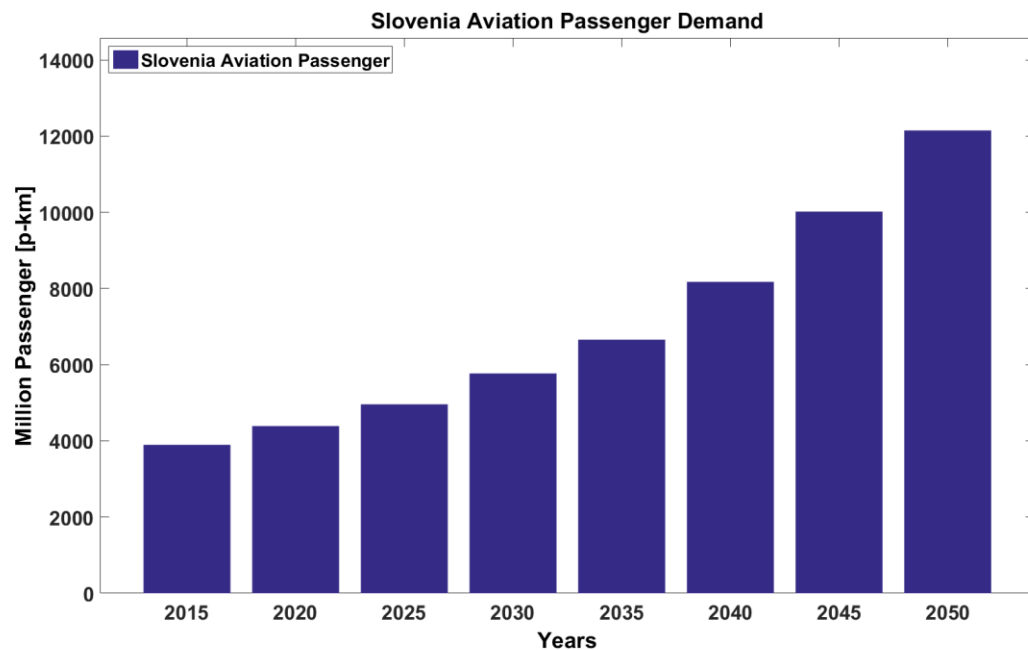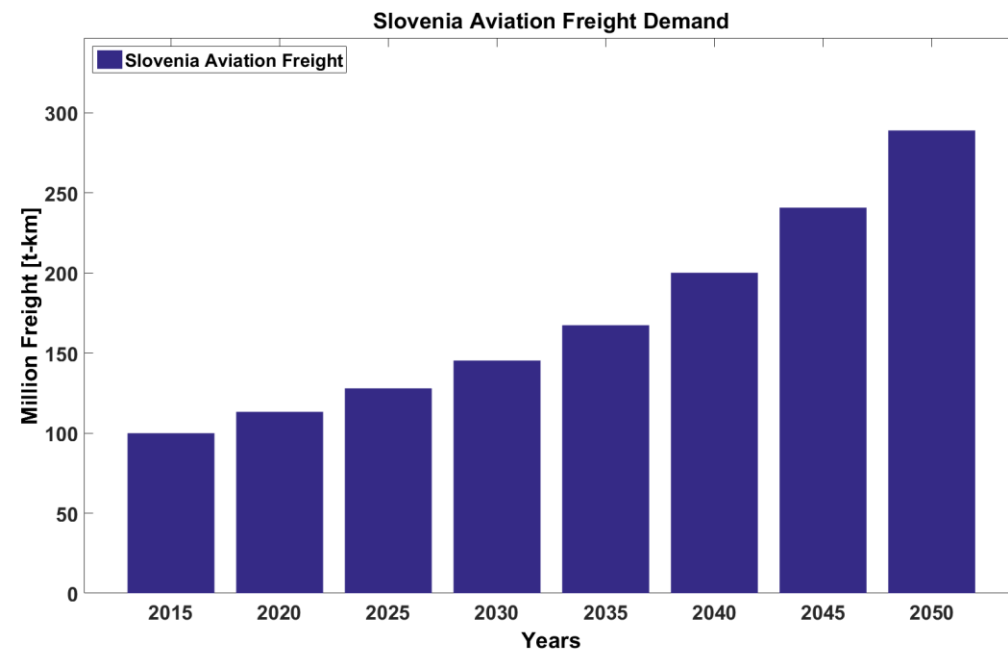

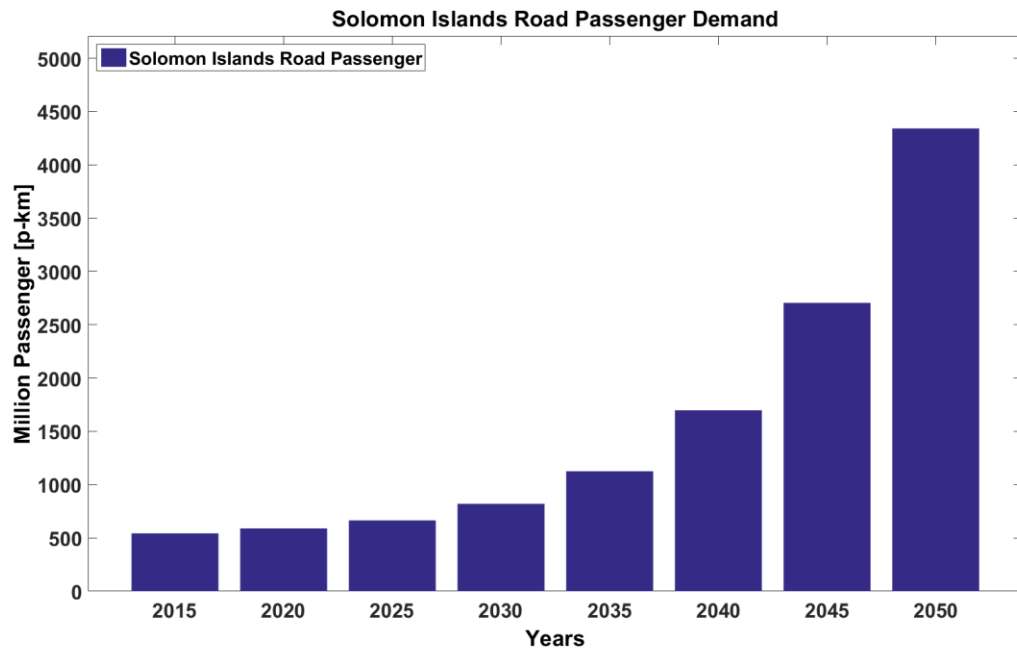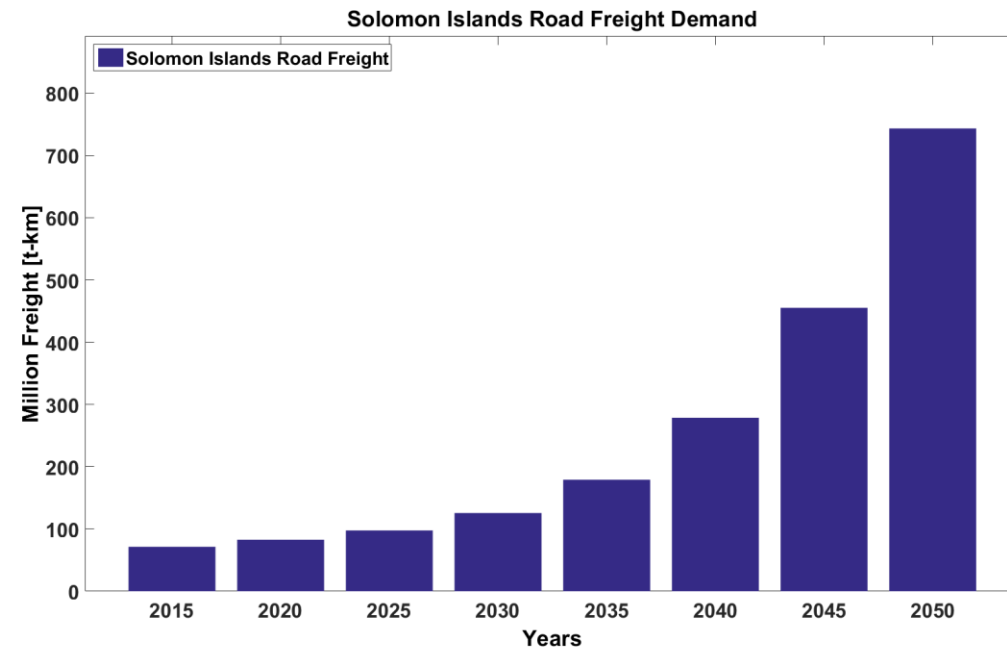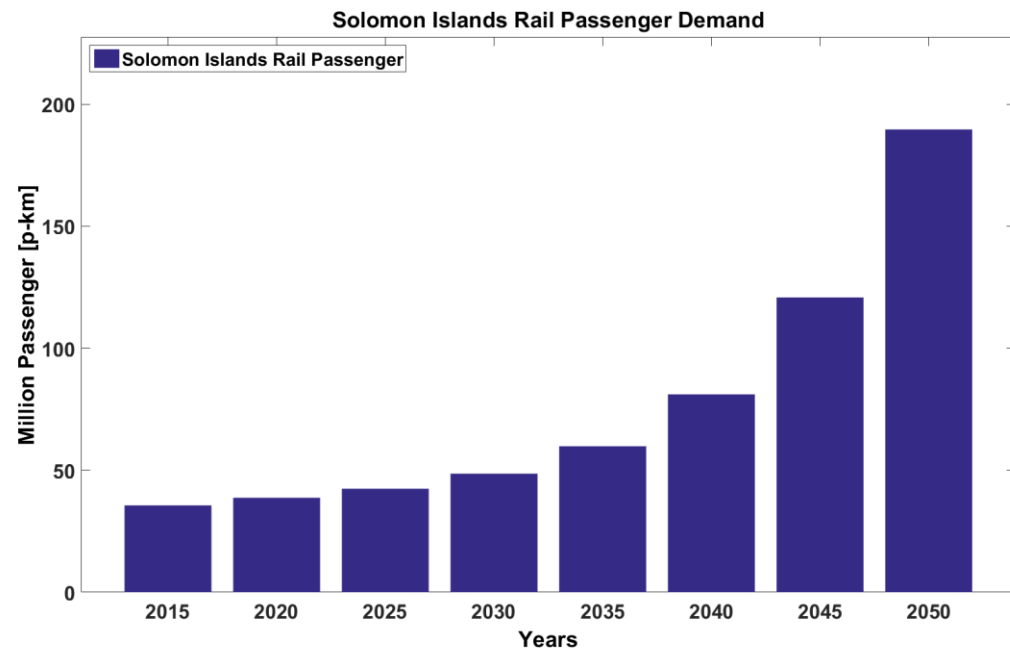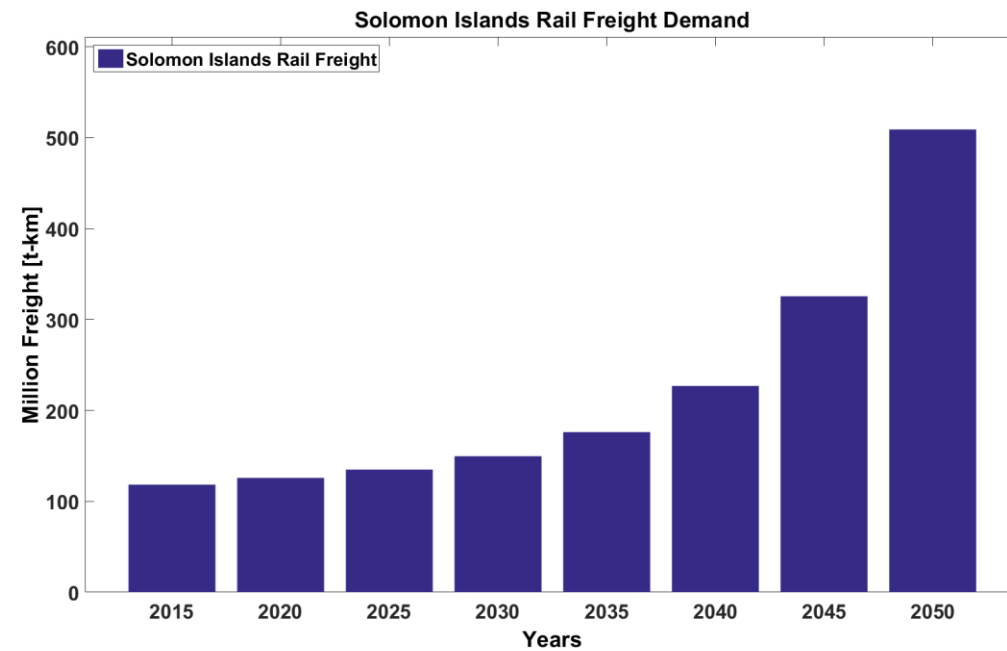

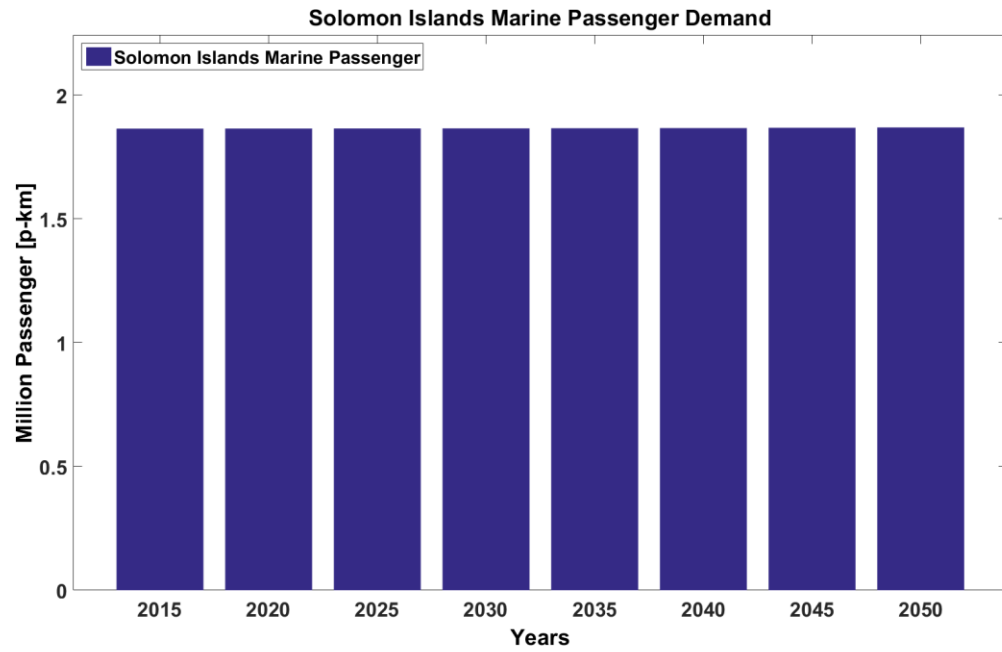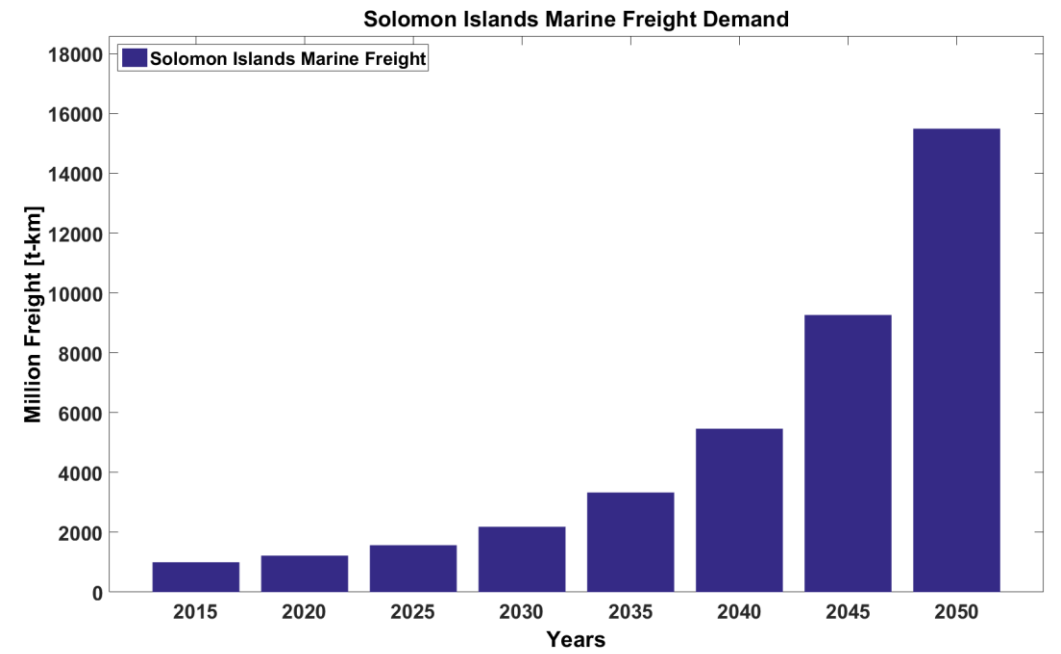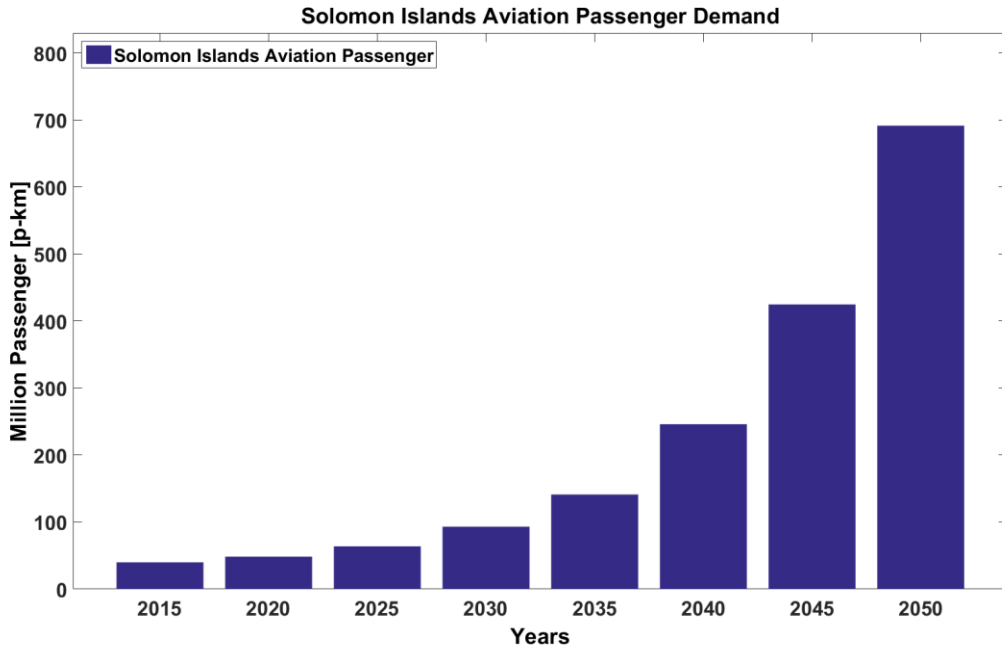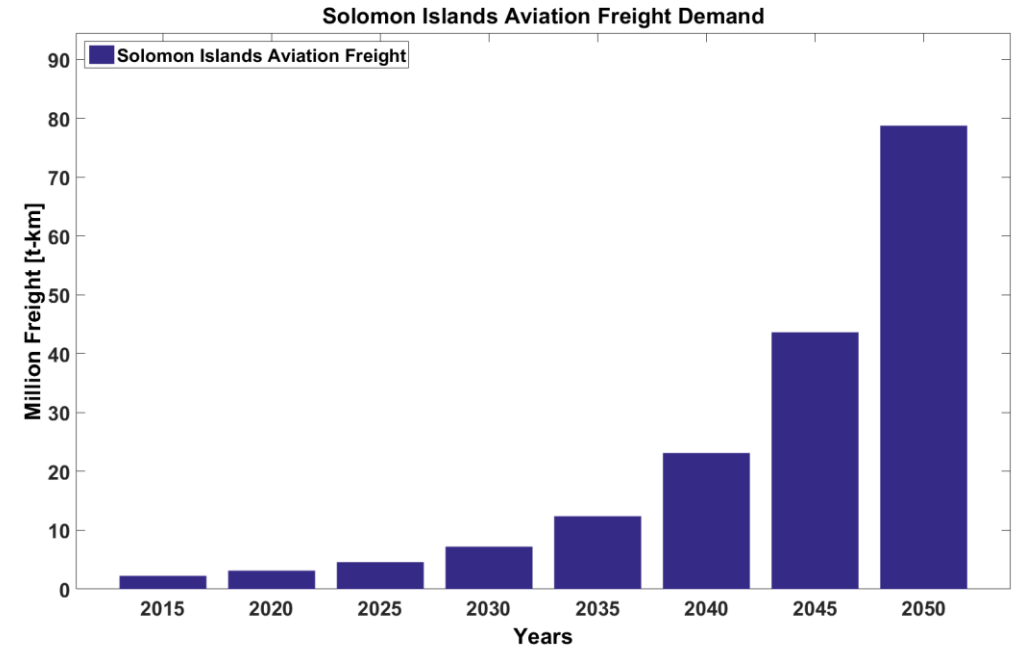

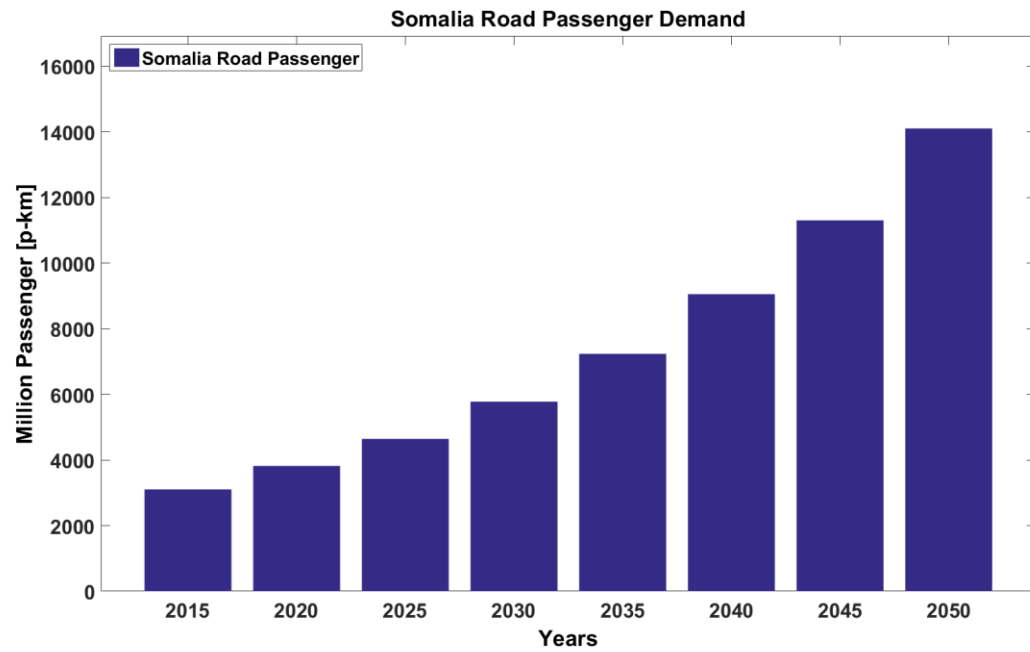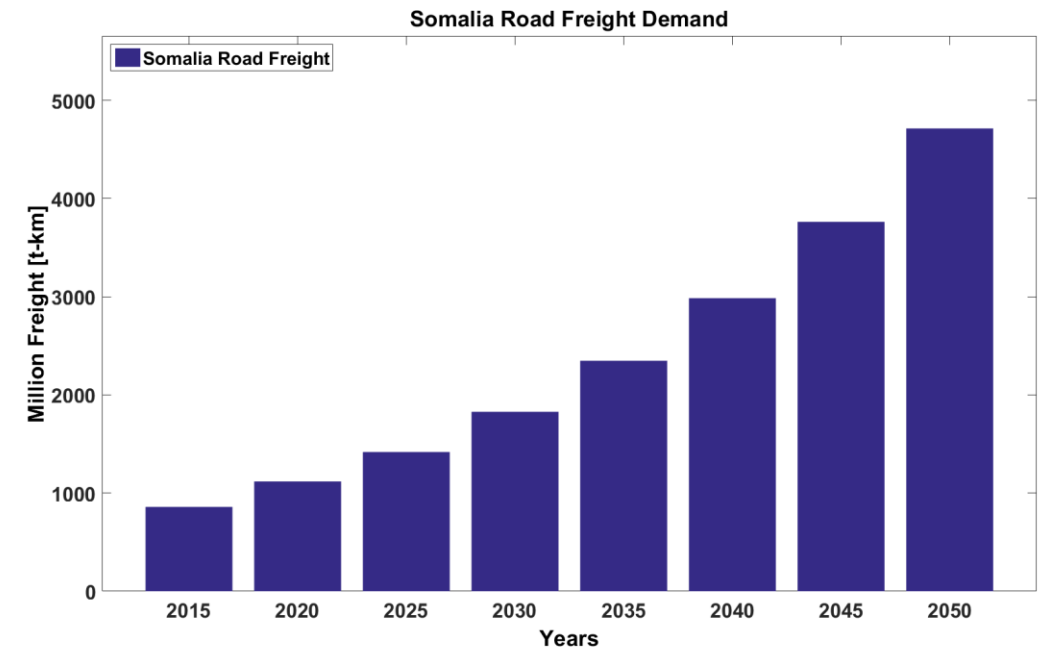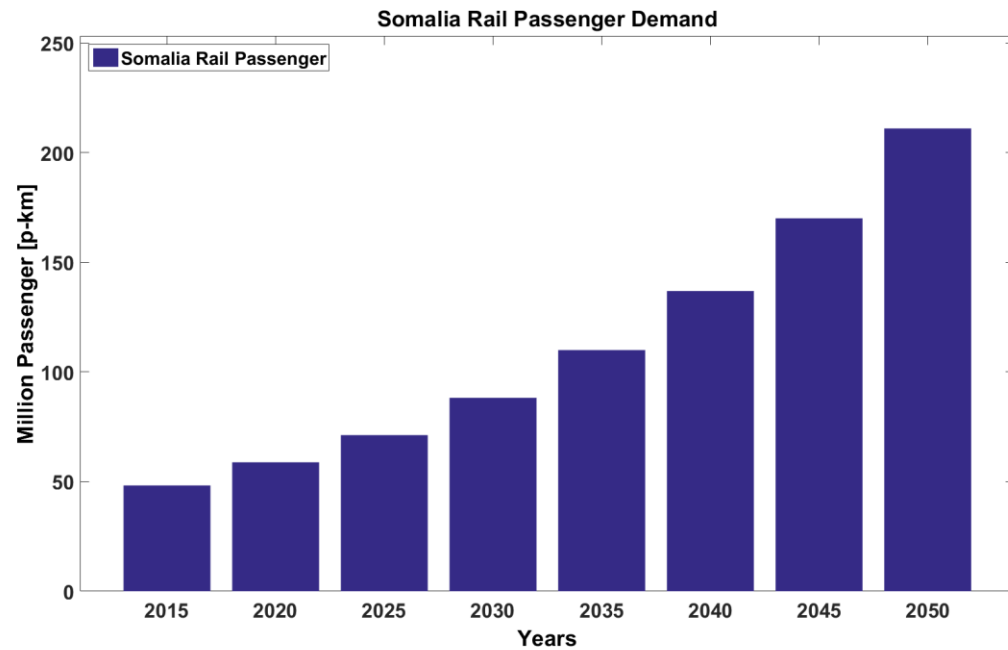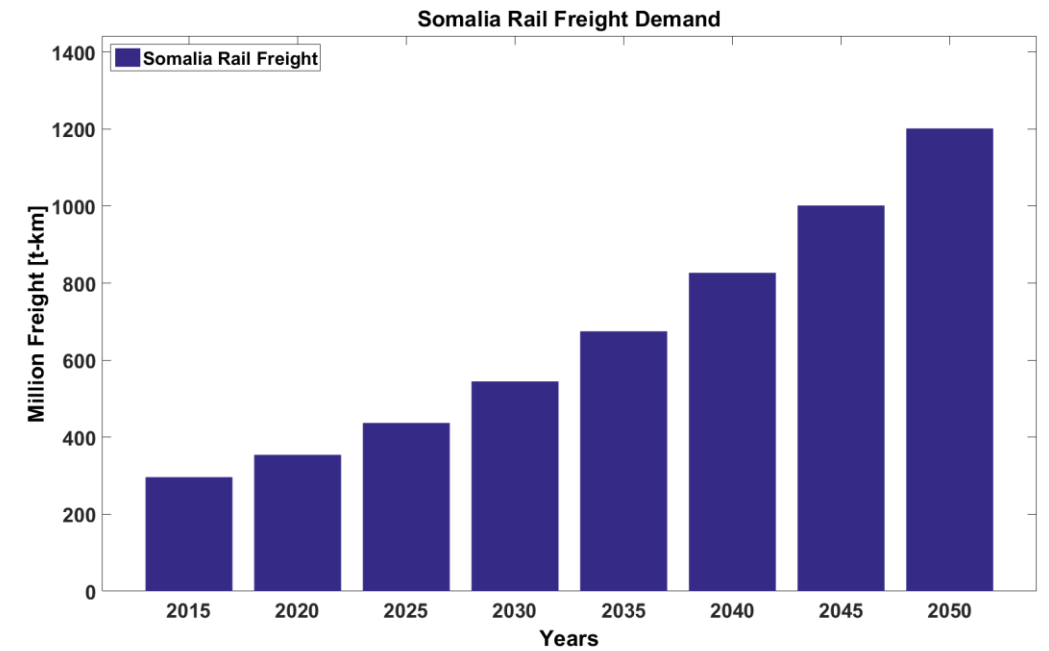

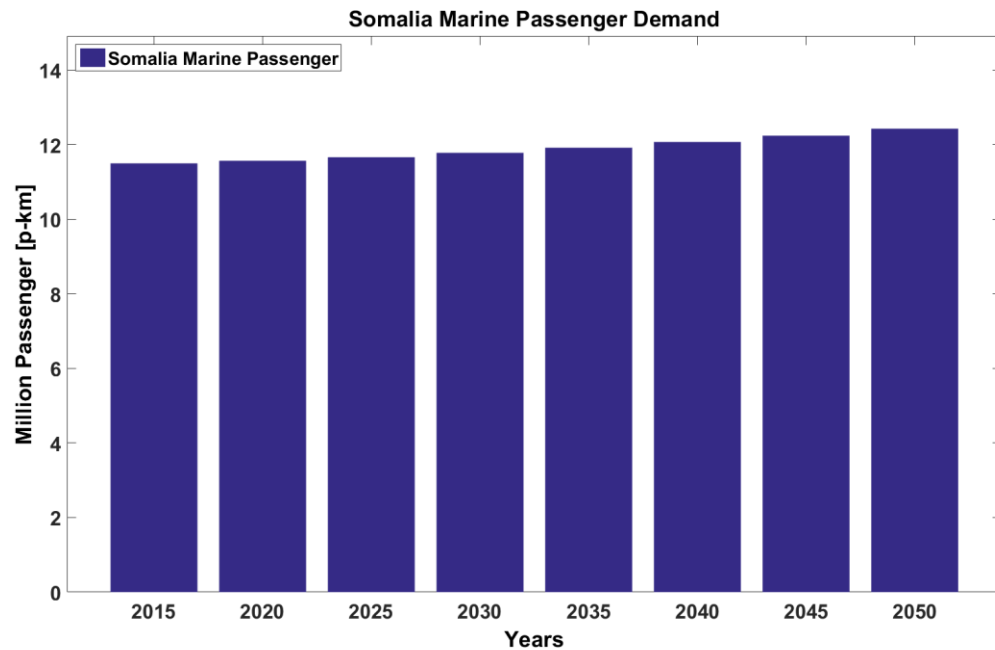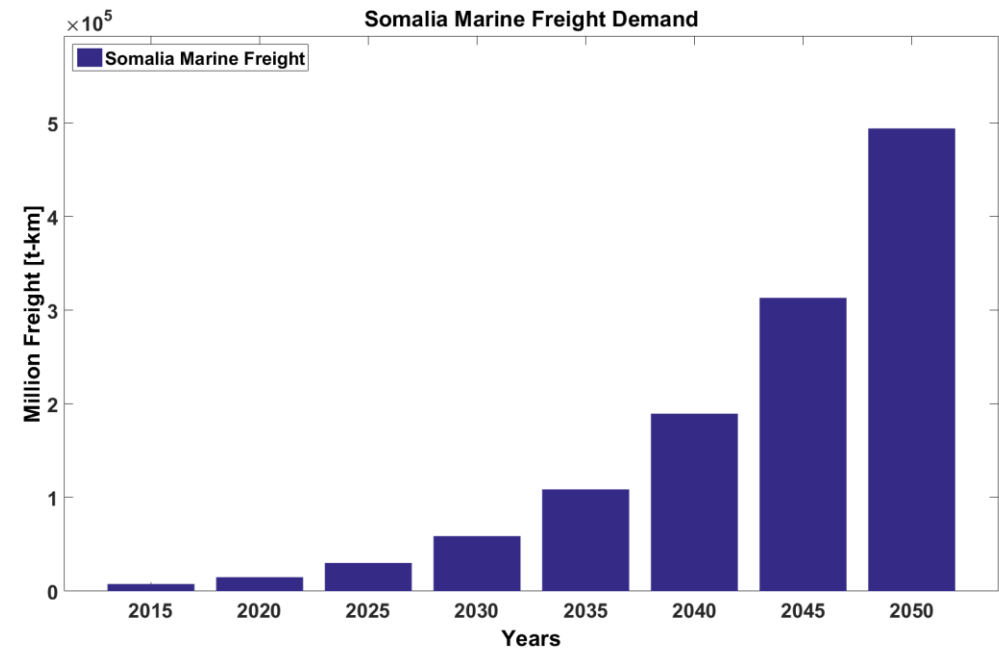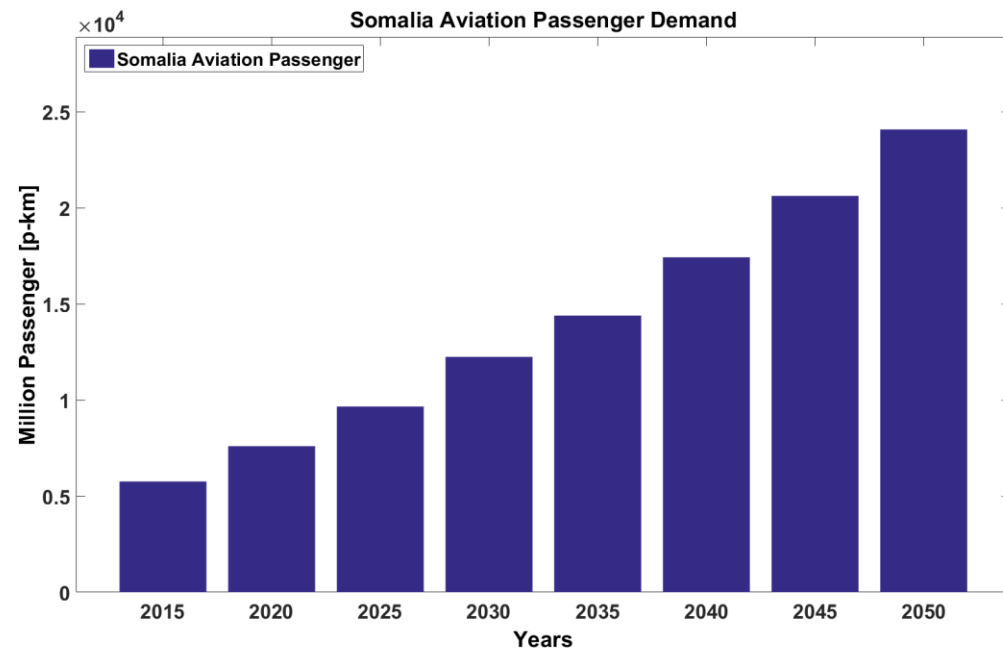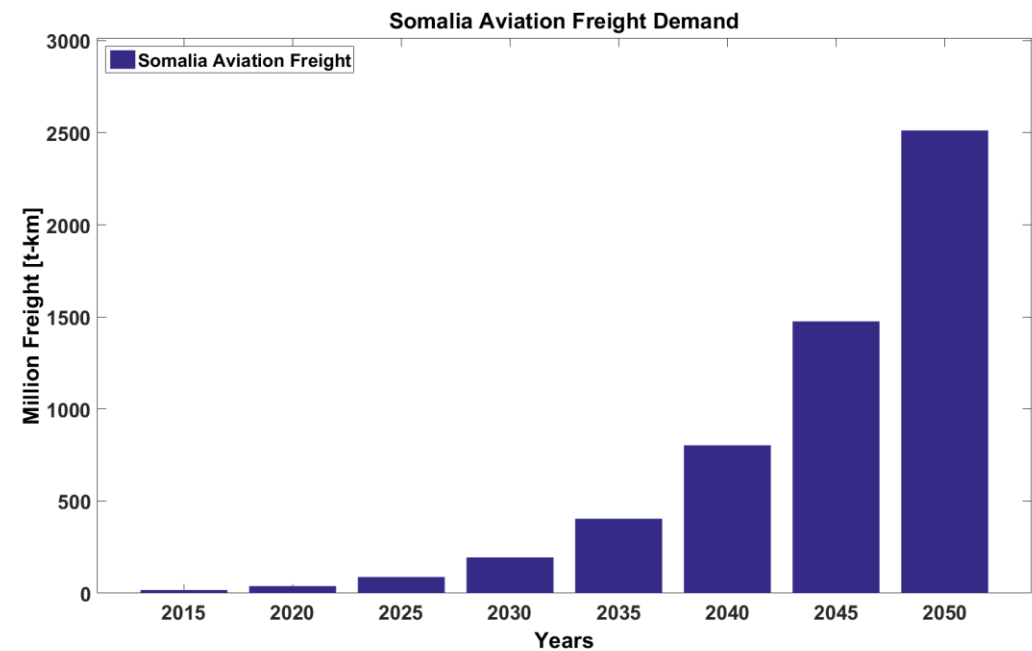

Supplement: s1 [file s1 › Supplementary_Material_Khalili2019_Transportation_Demand_4.pdf]
