# Supplementary material
Source: MDPI journal article supplement (https://www.mdpi.com/1996-1073/12/20/3870)

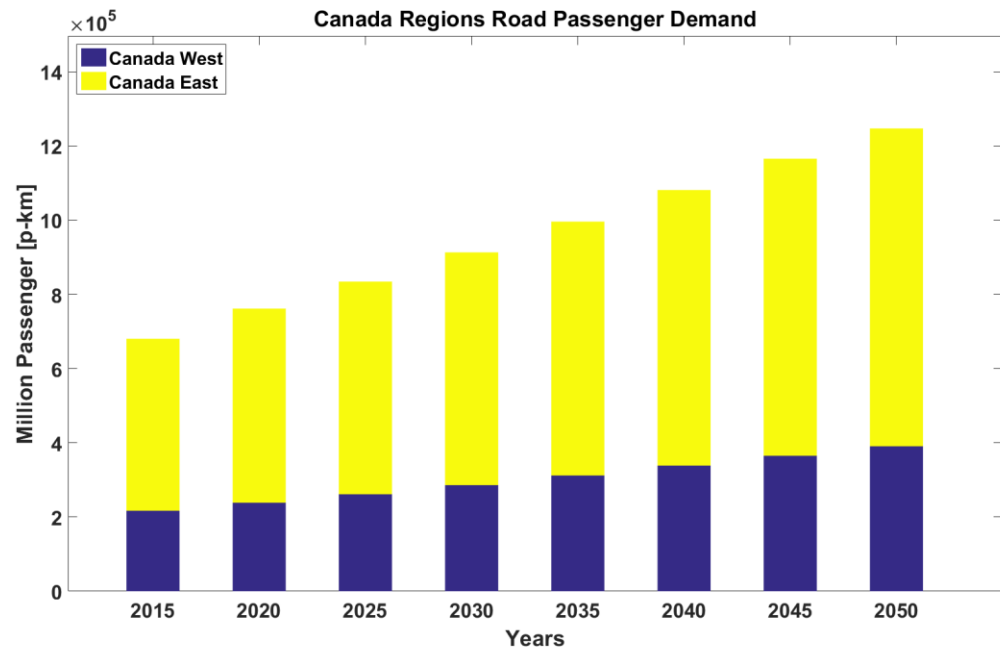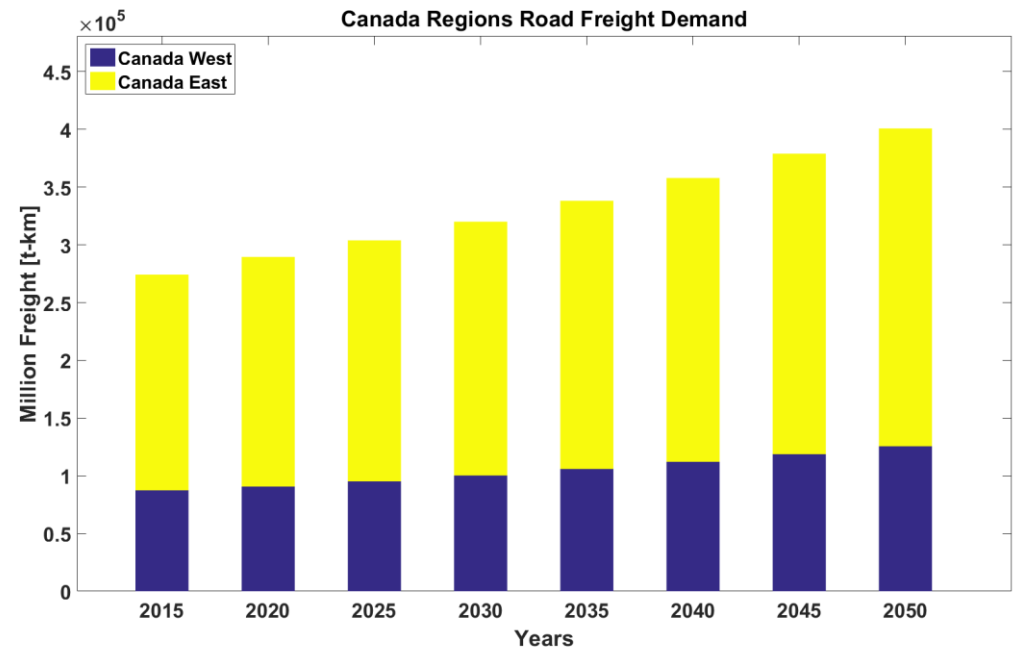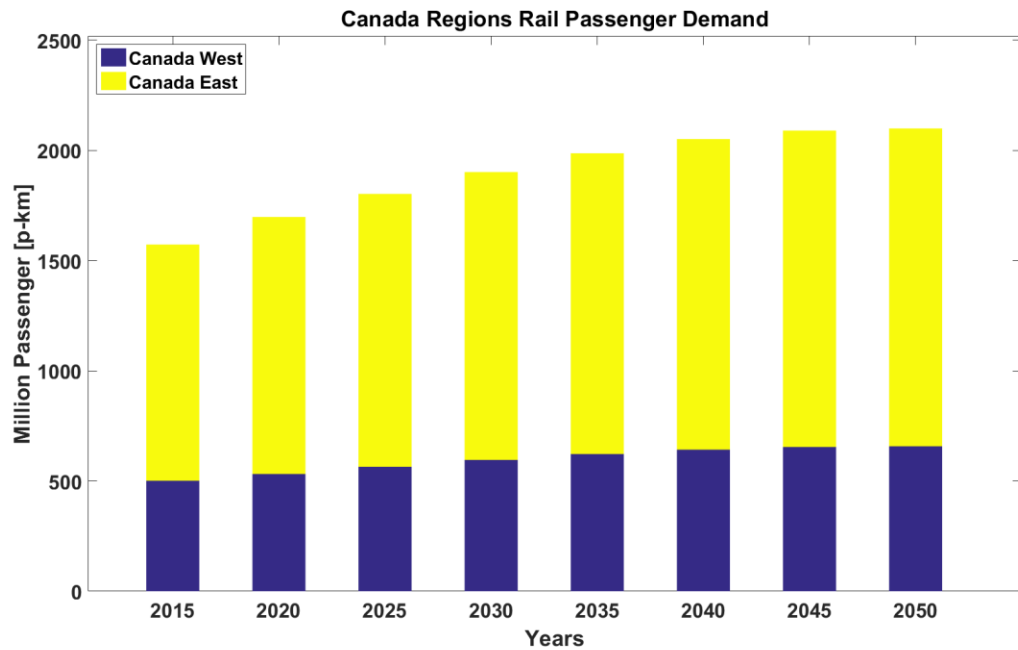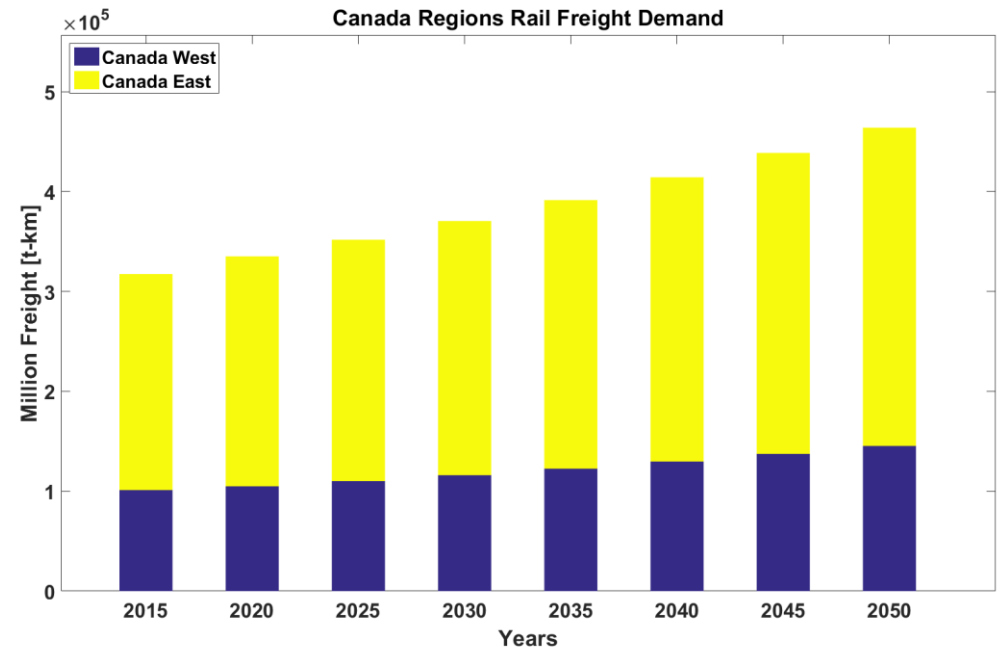

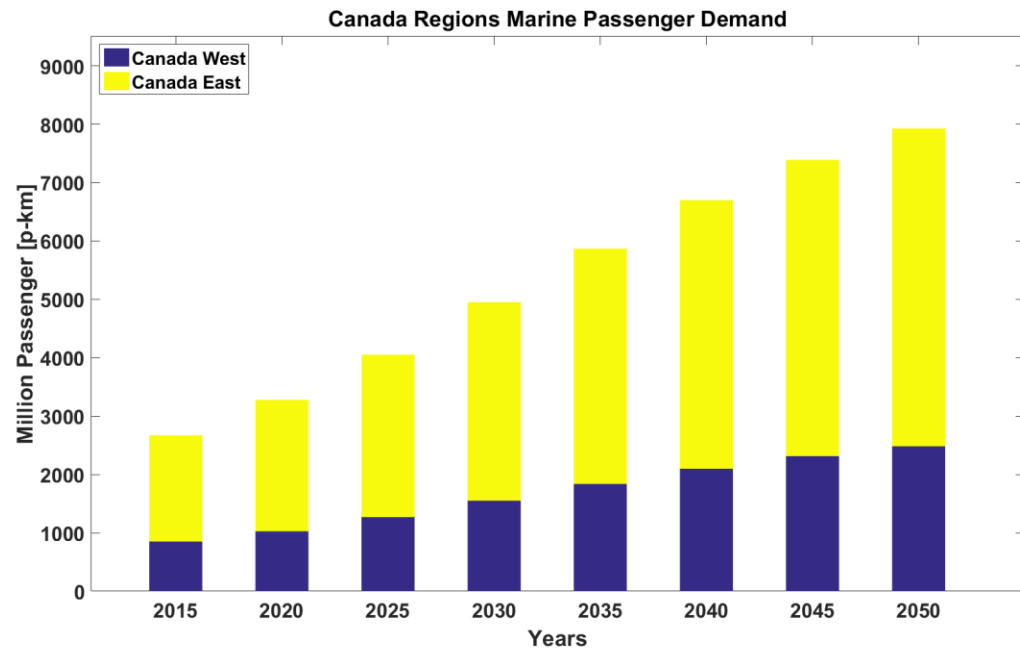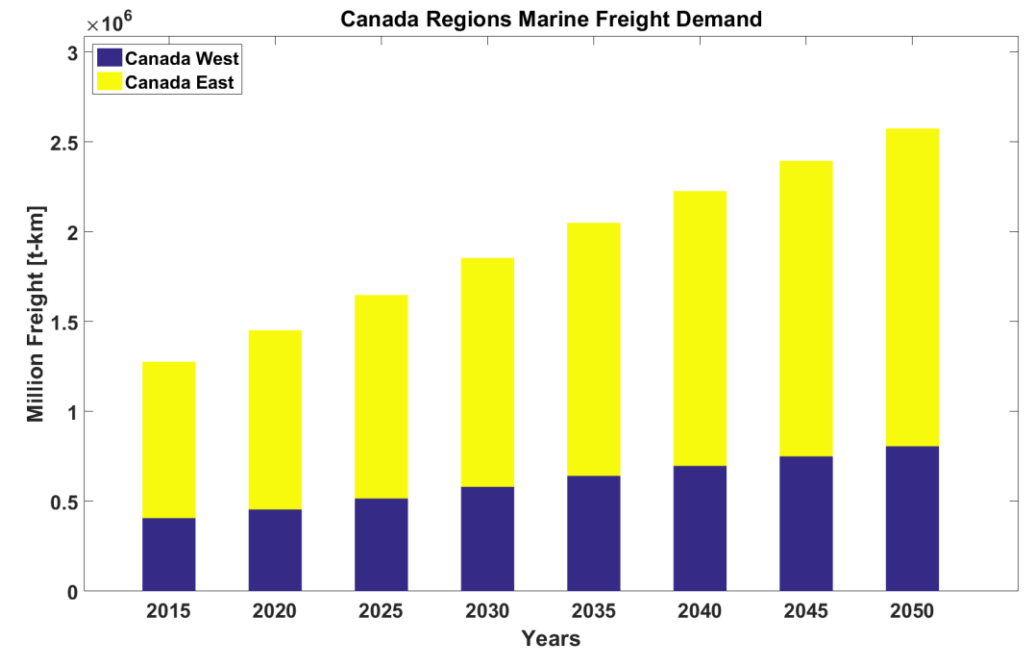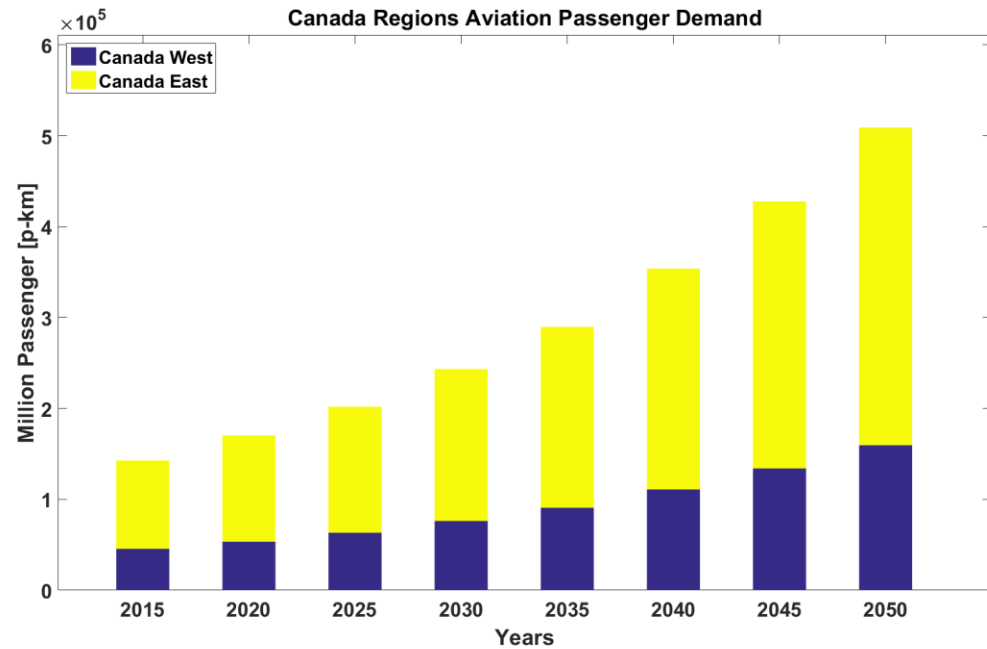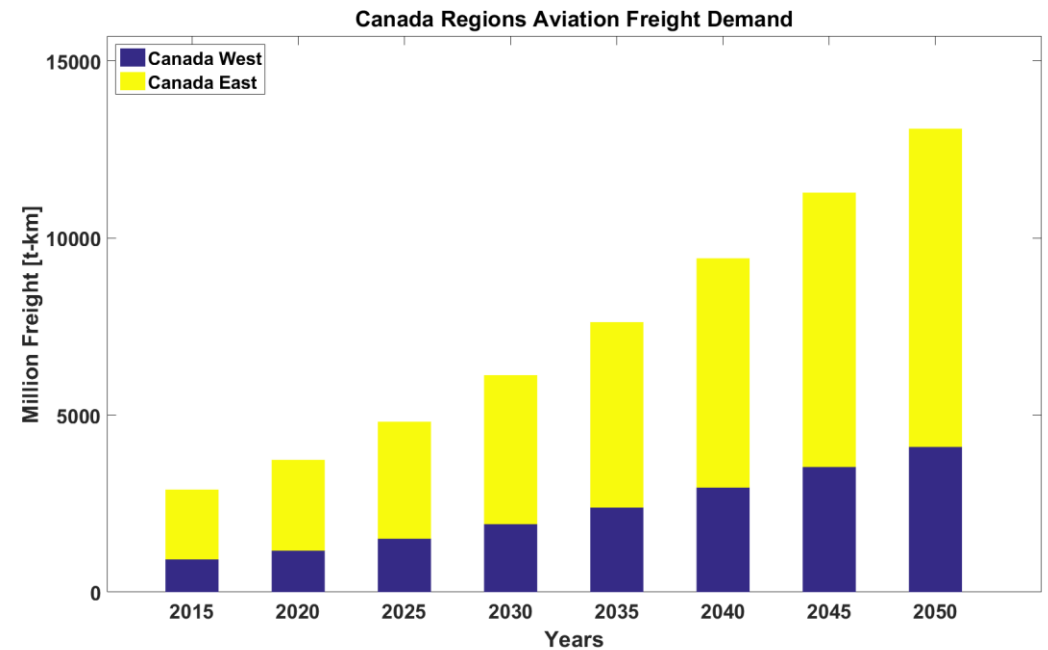

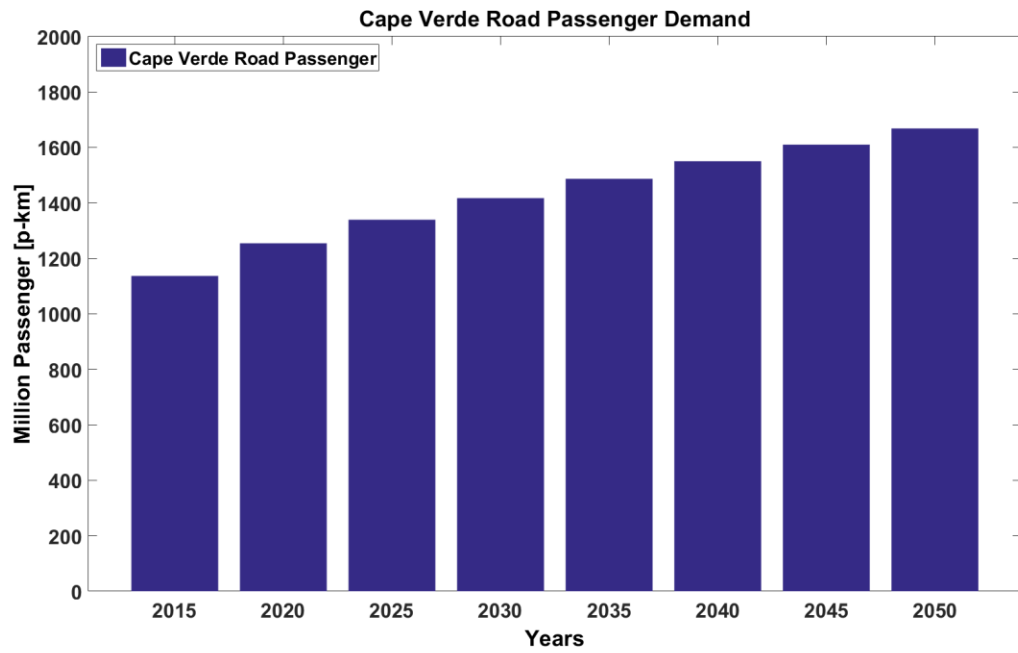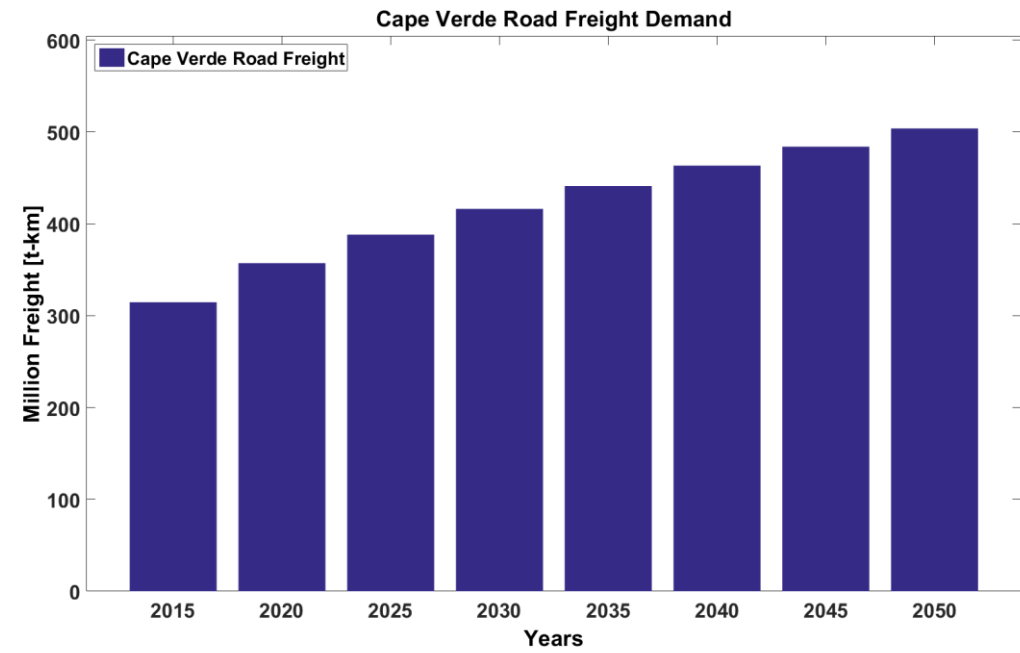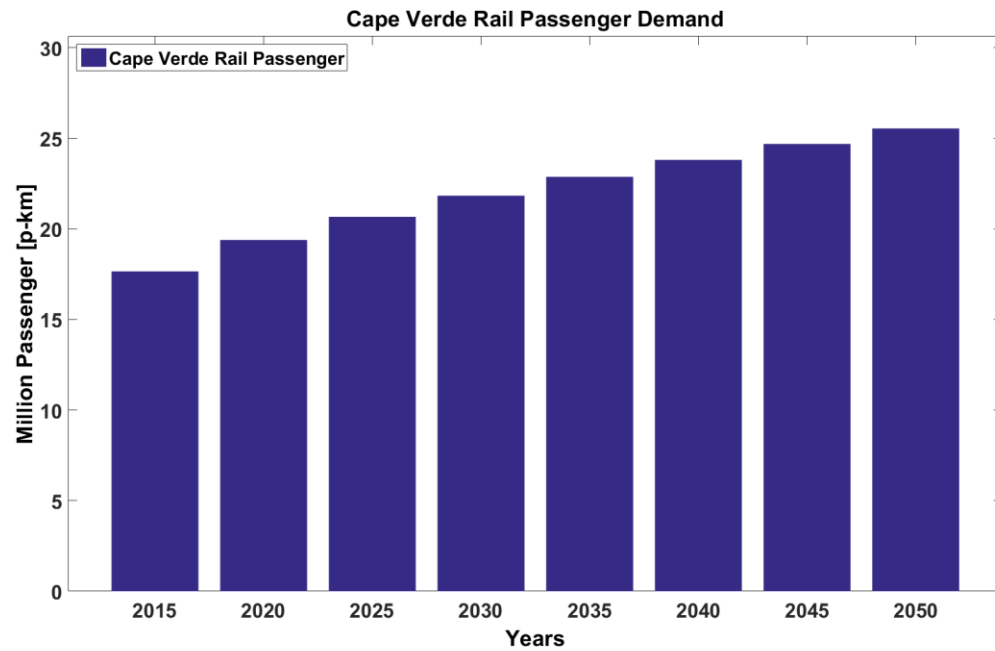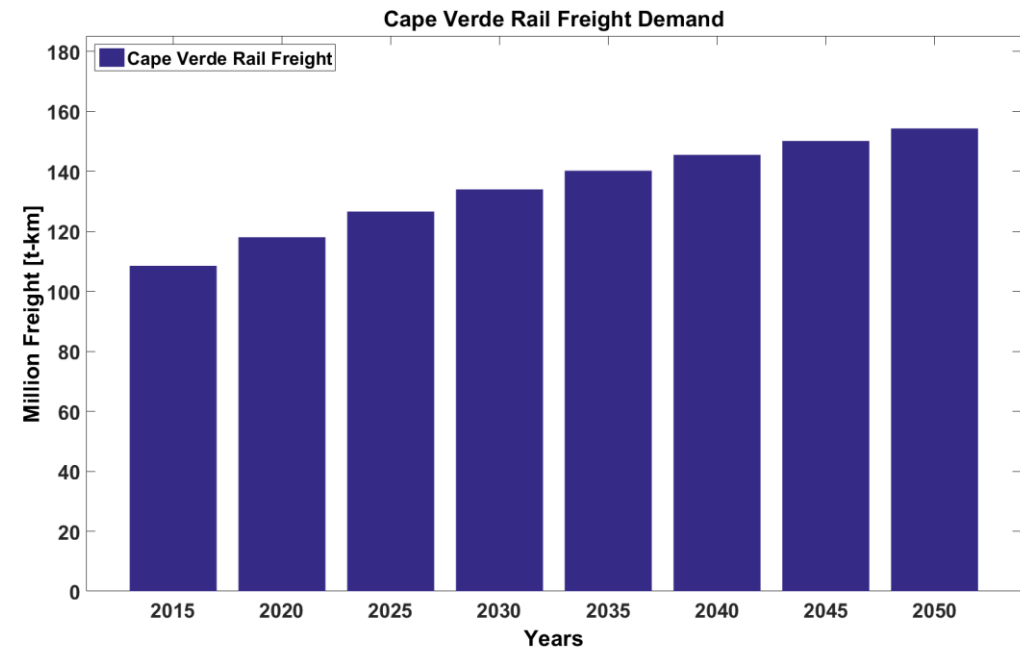

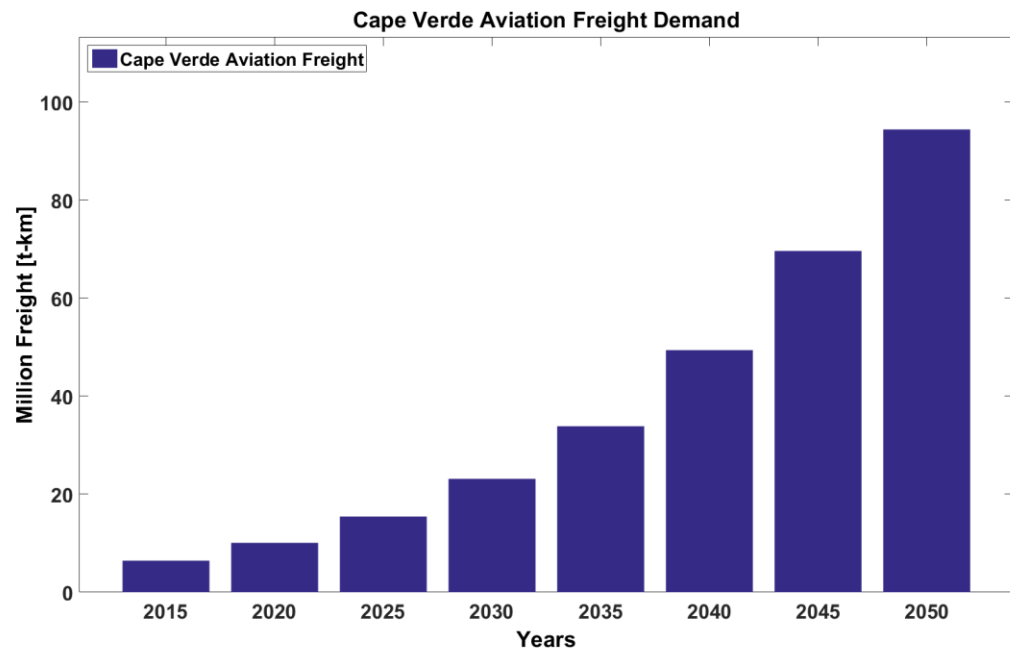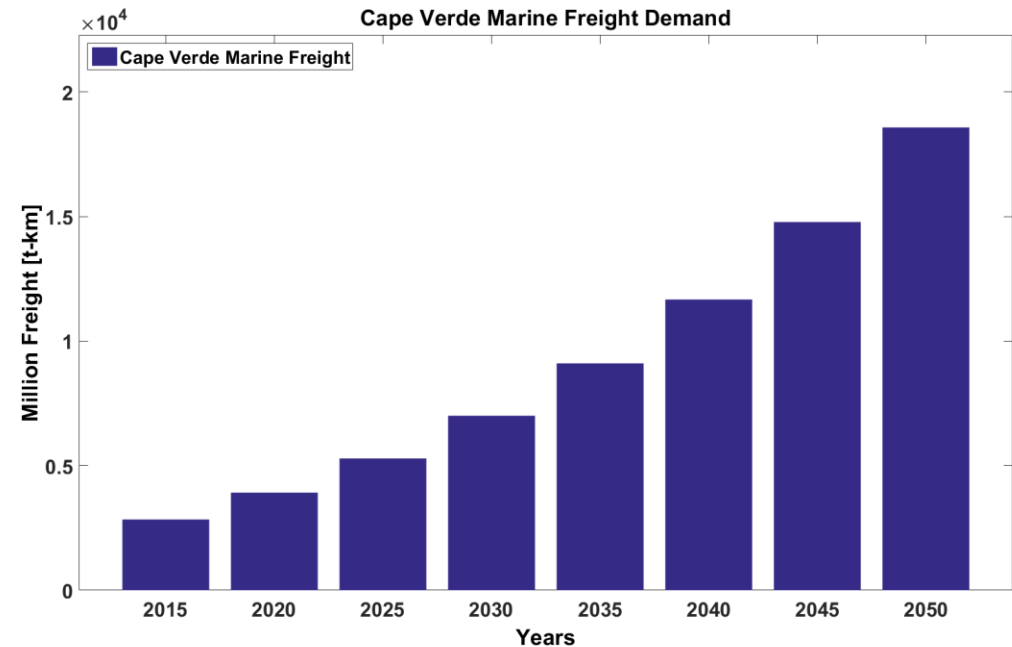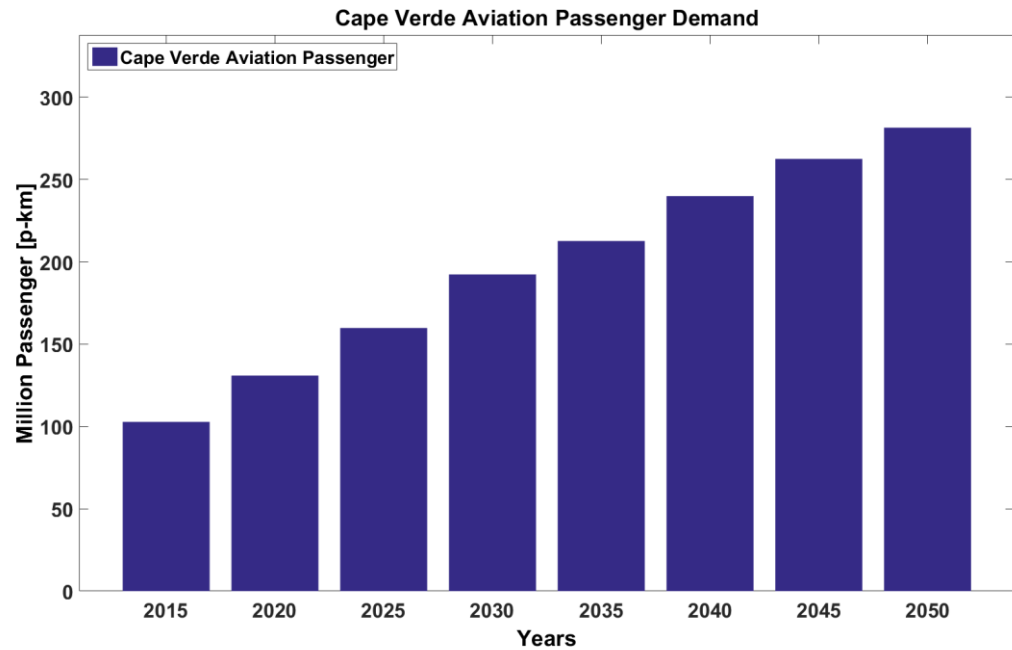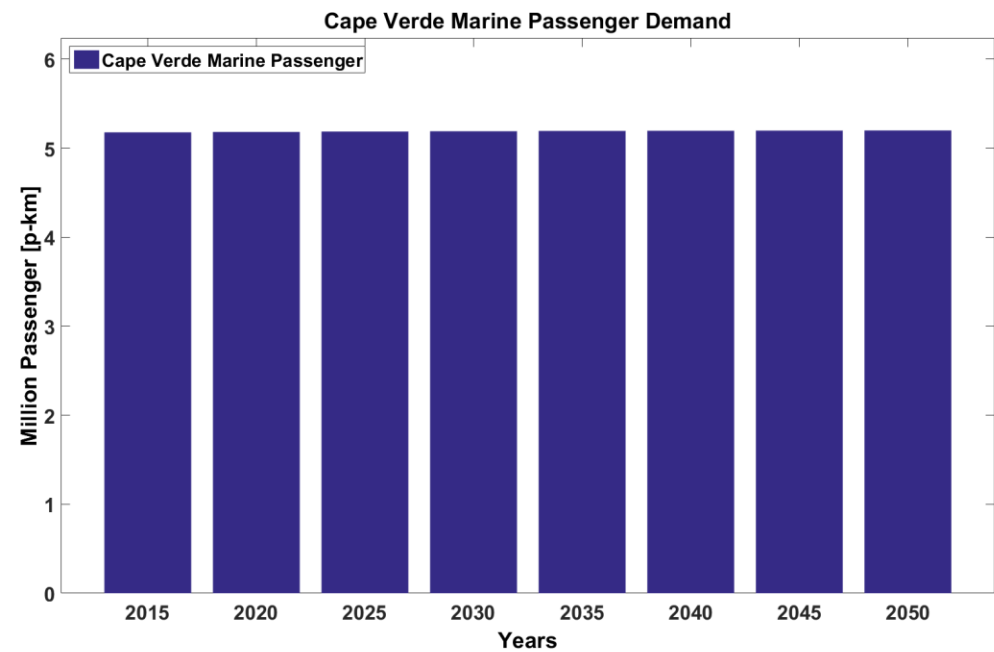

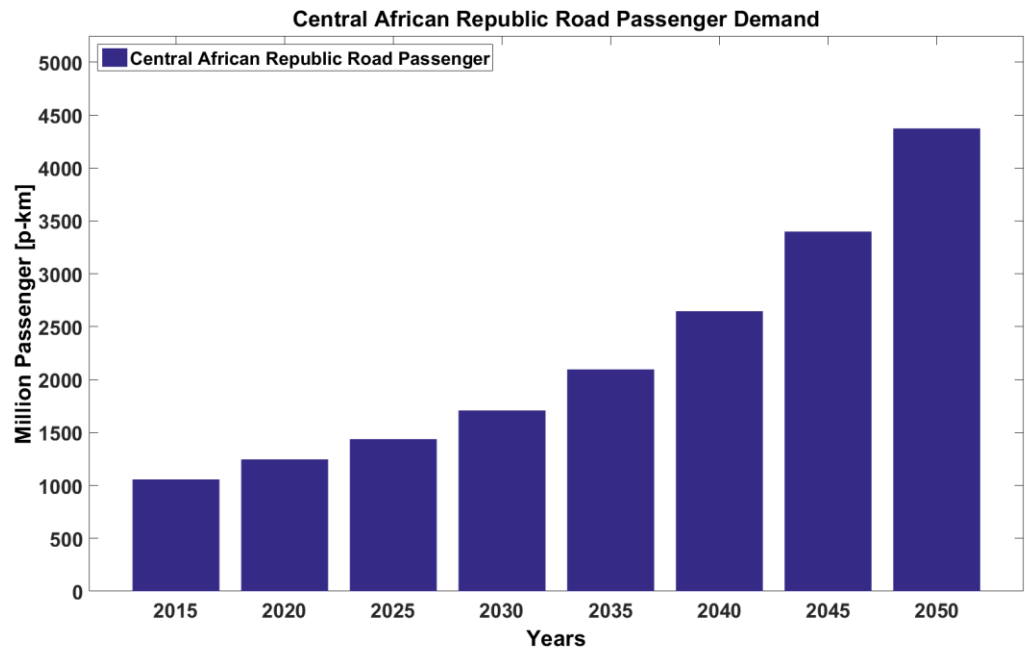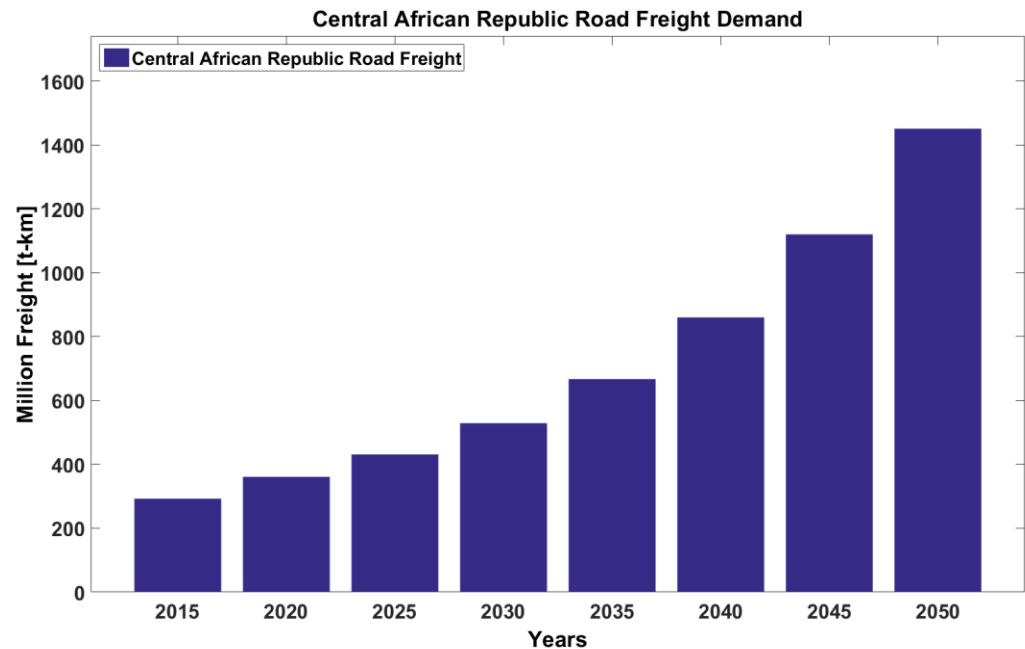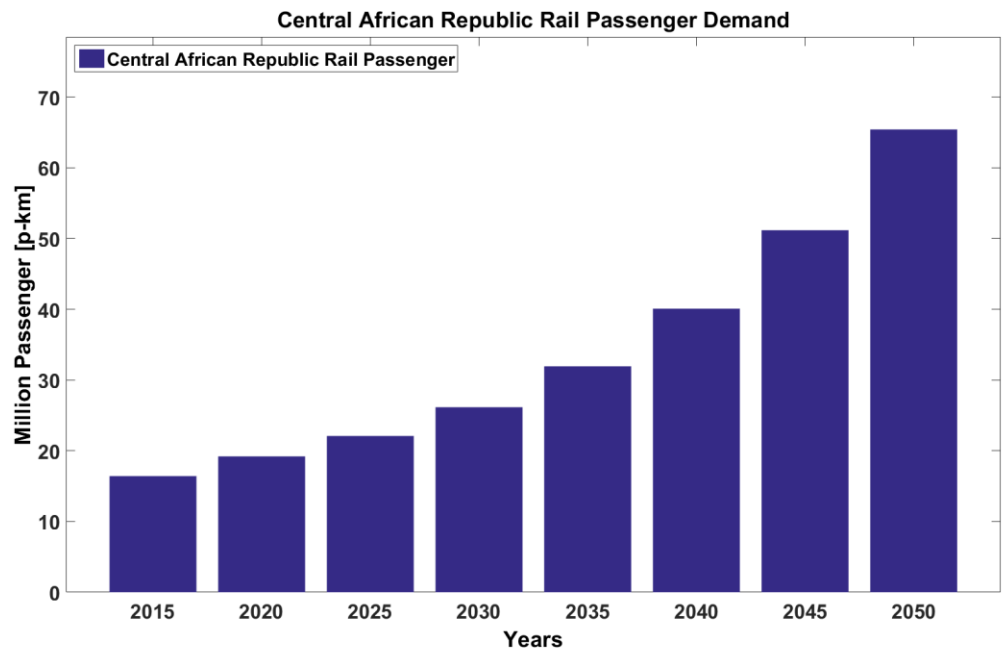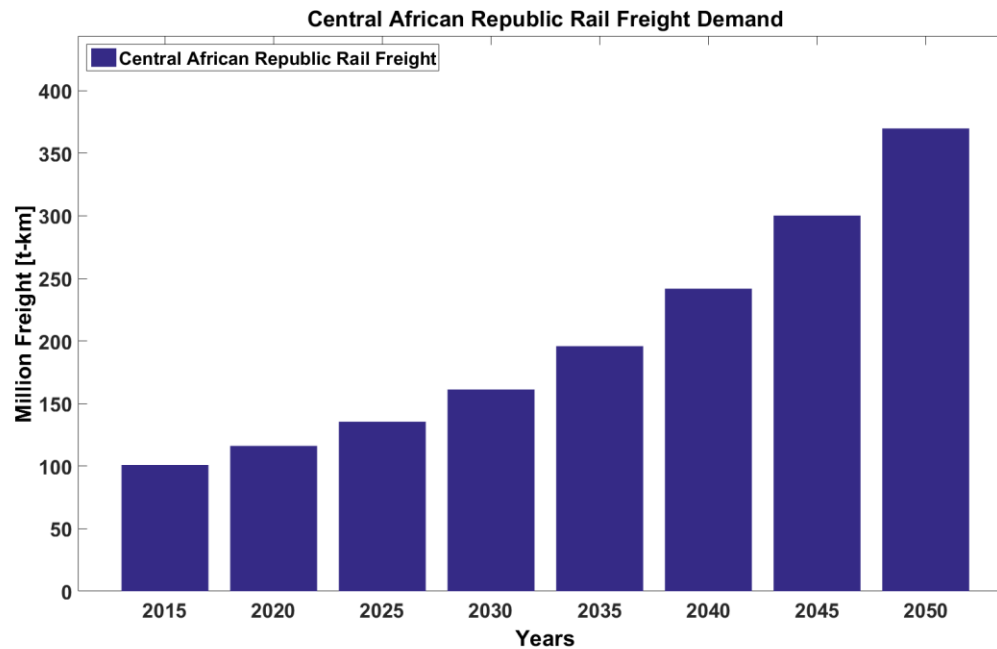

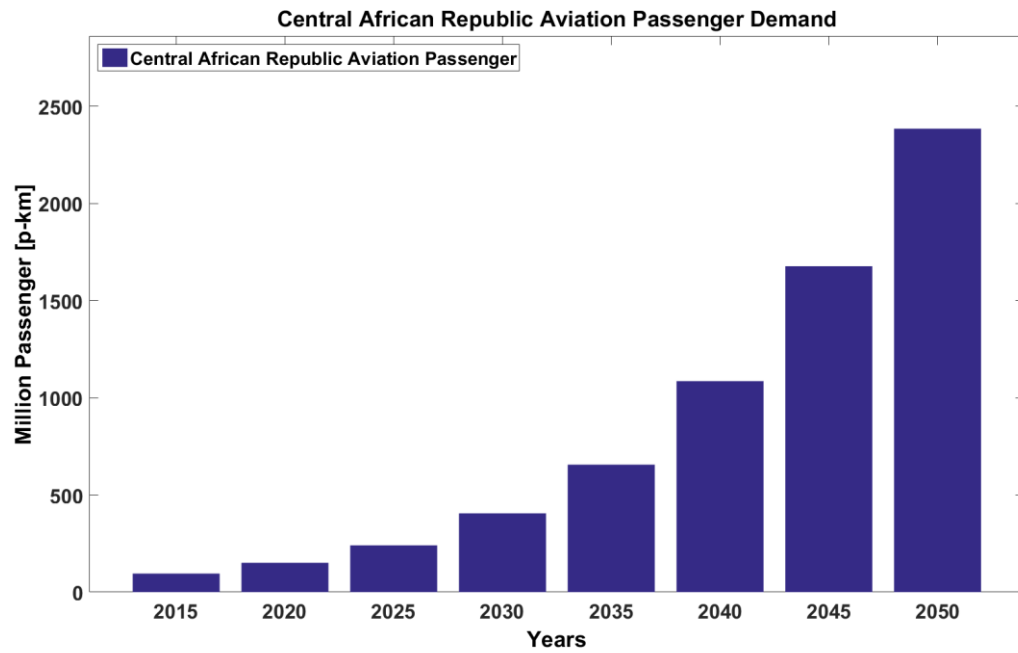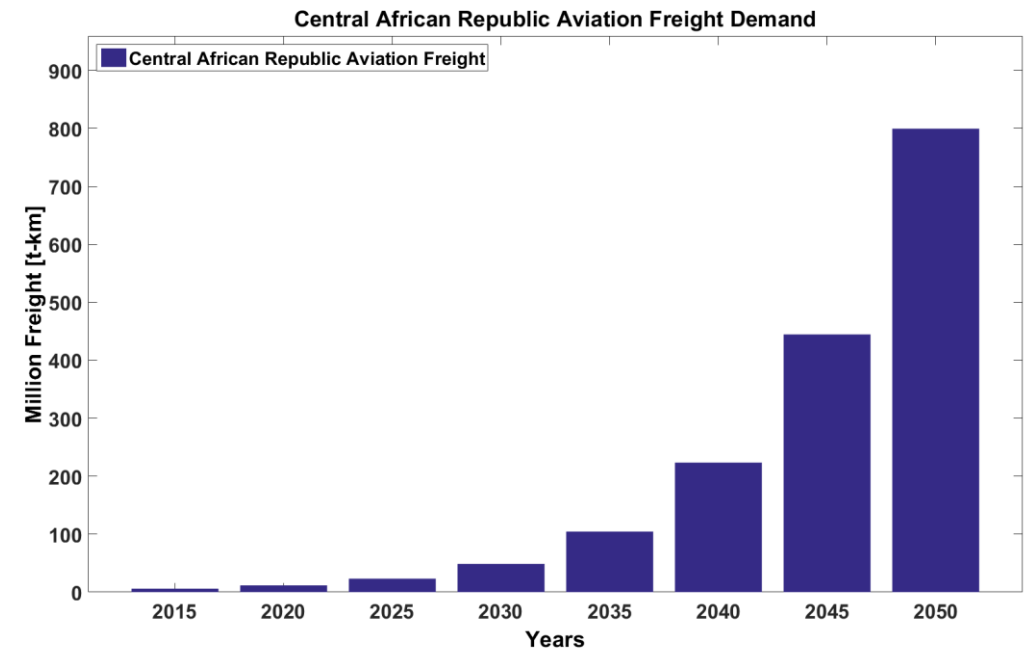

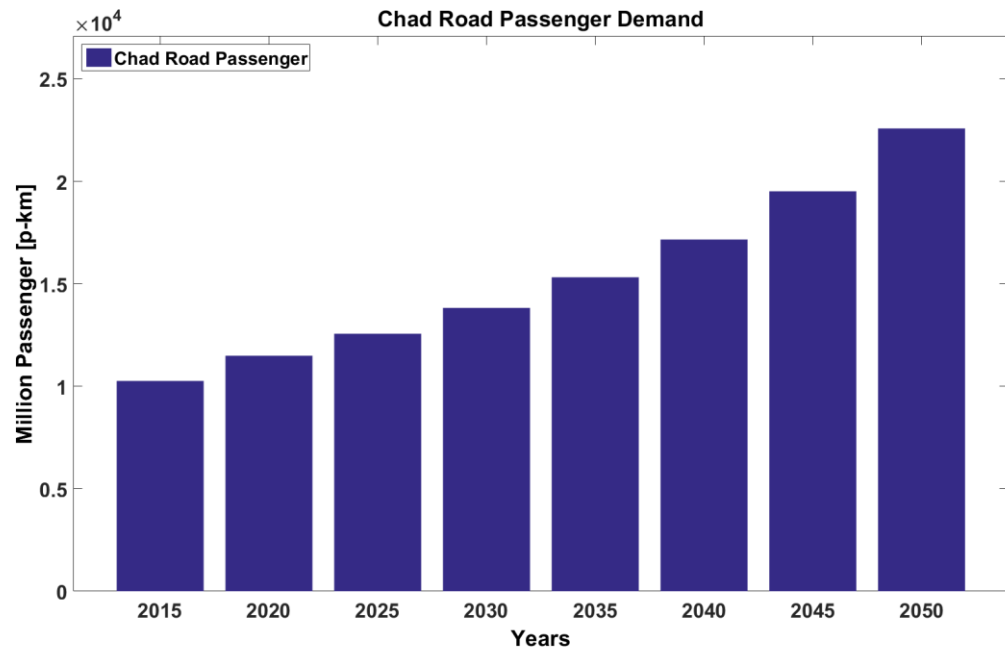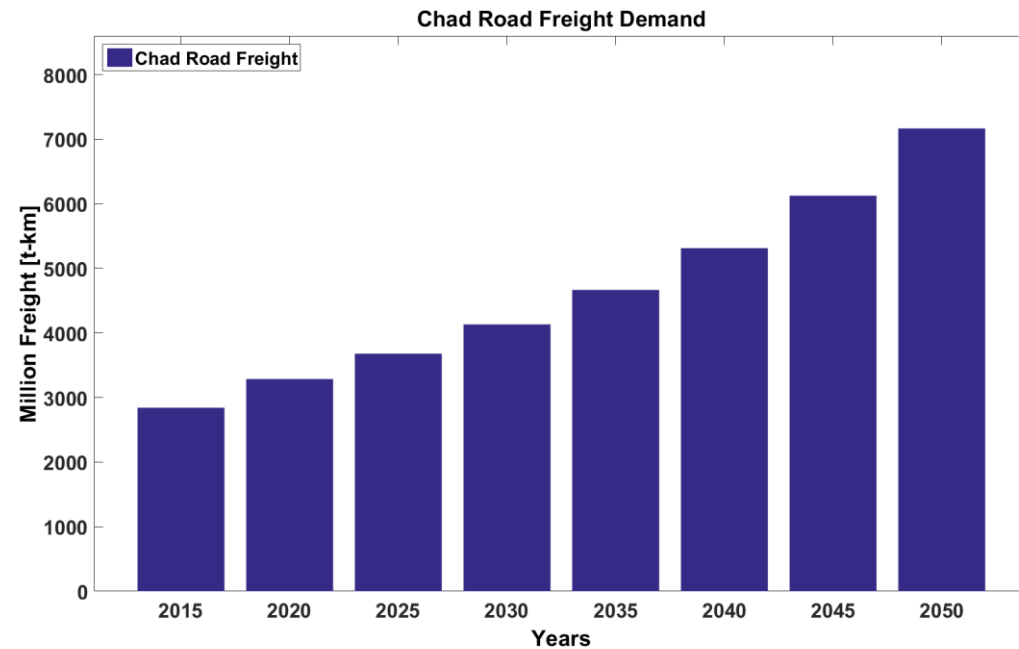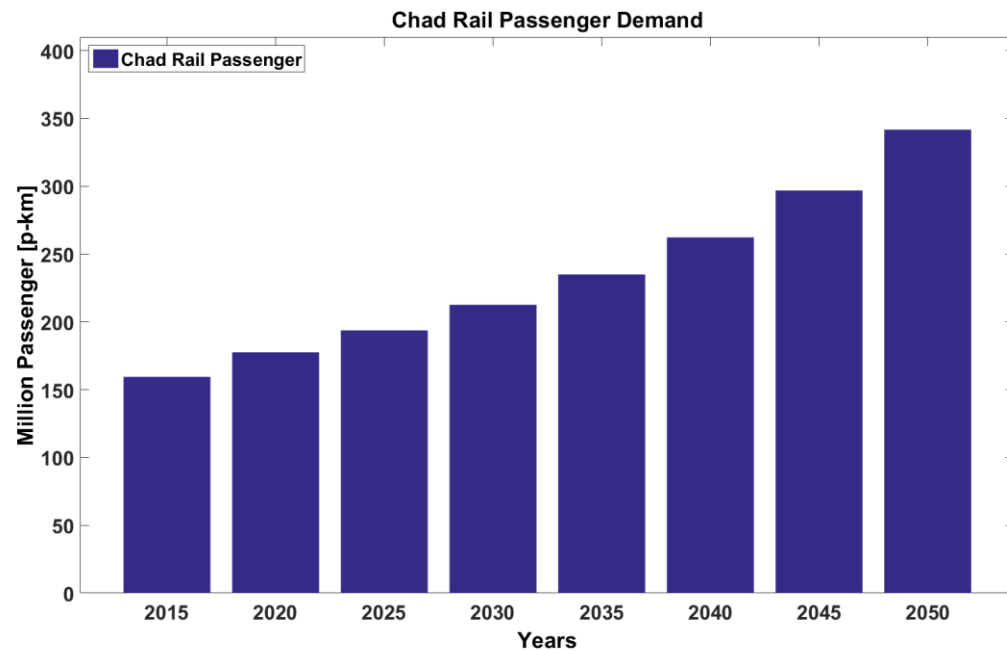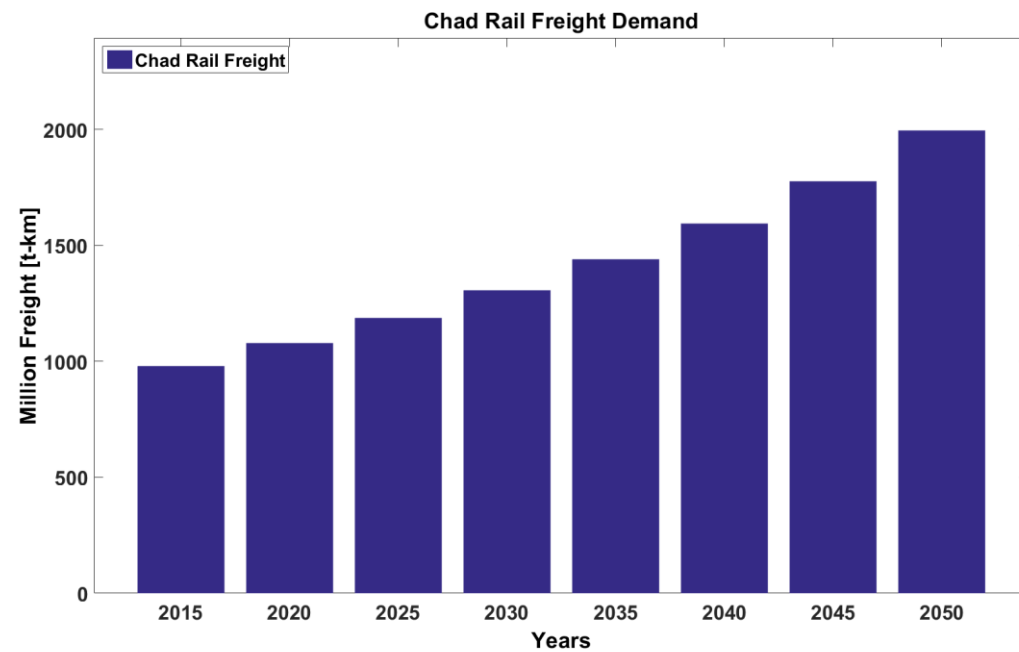

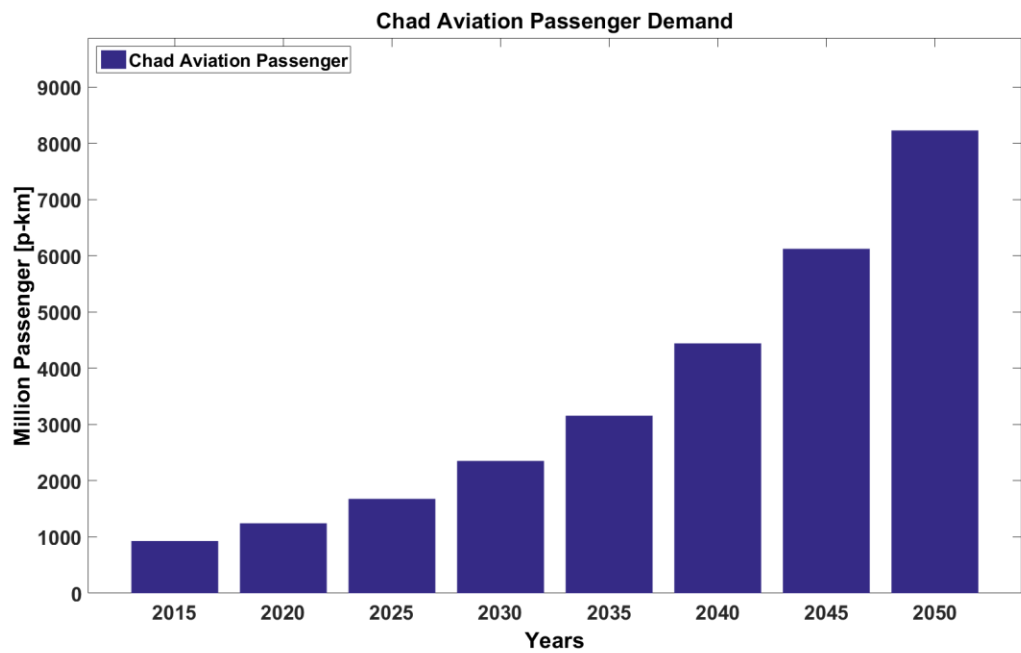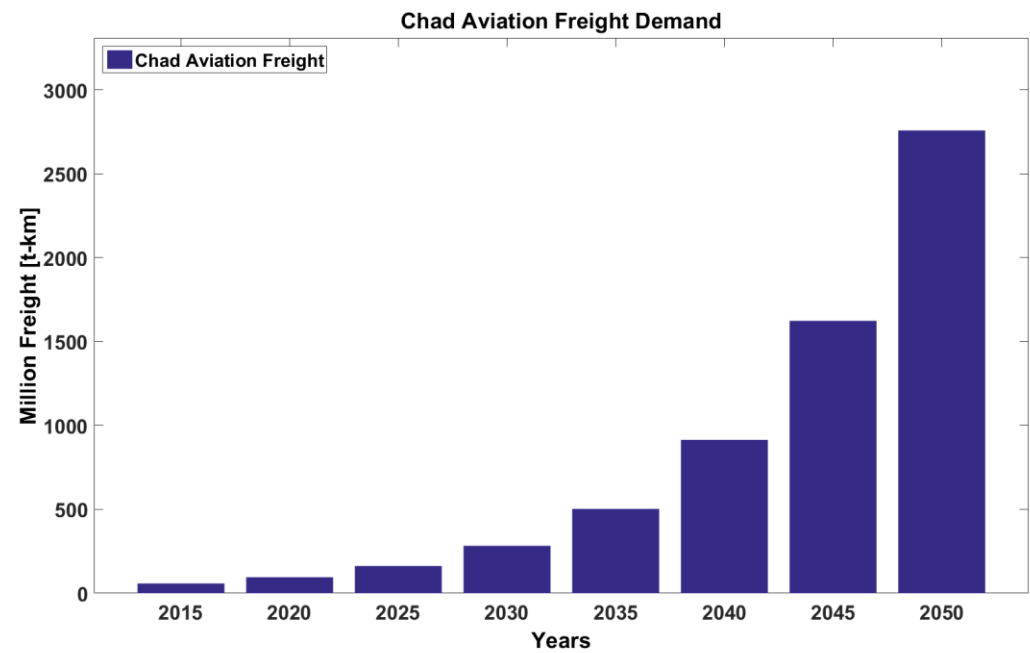

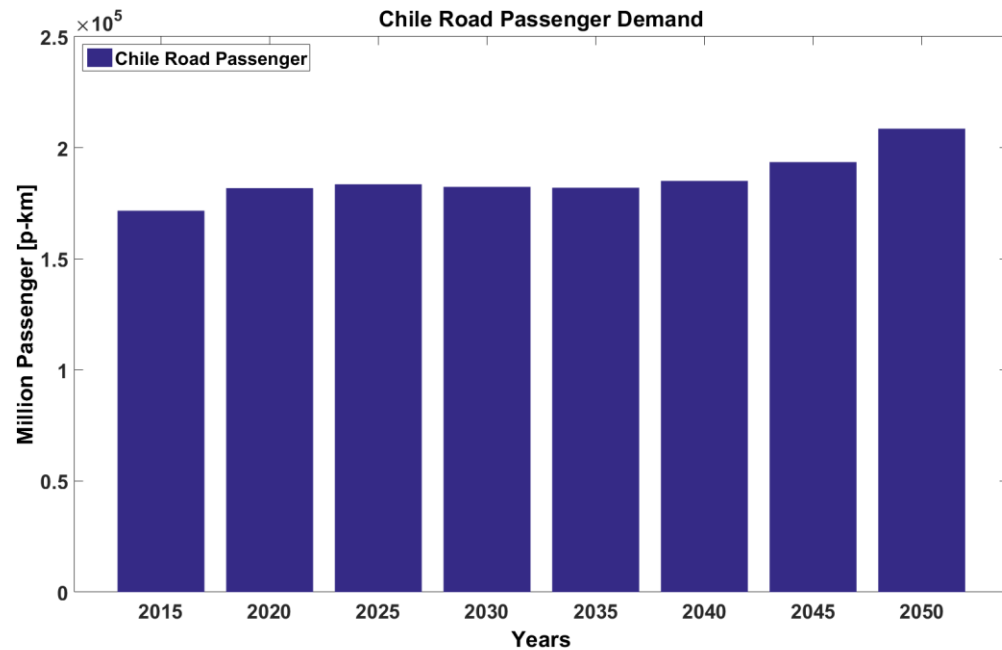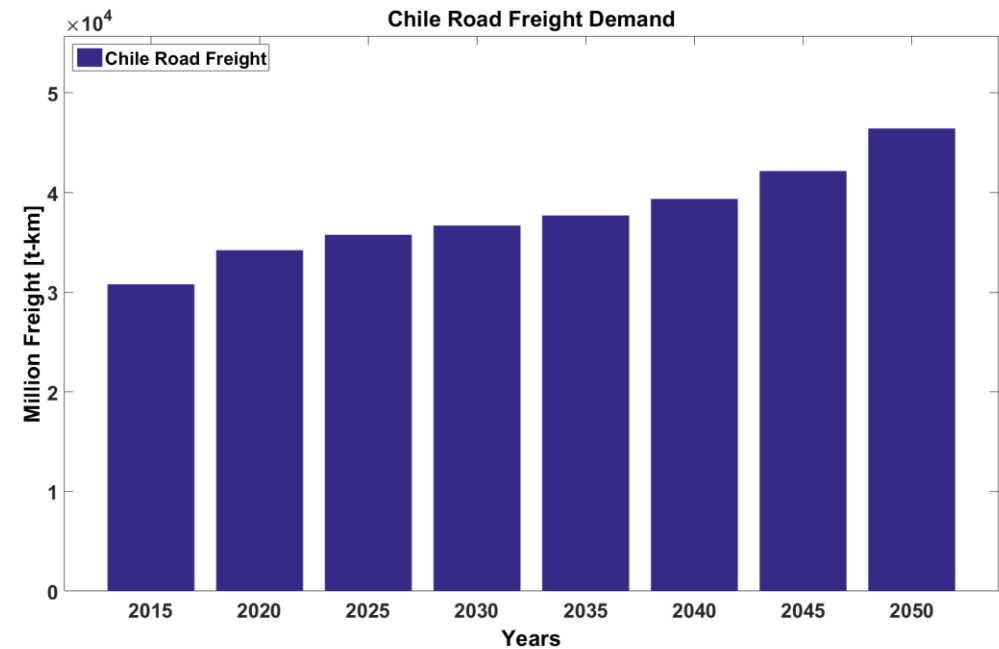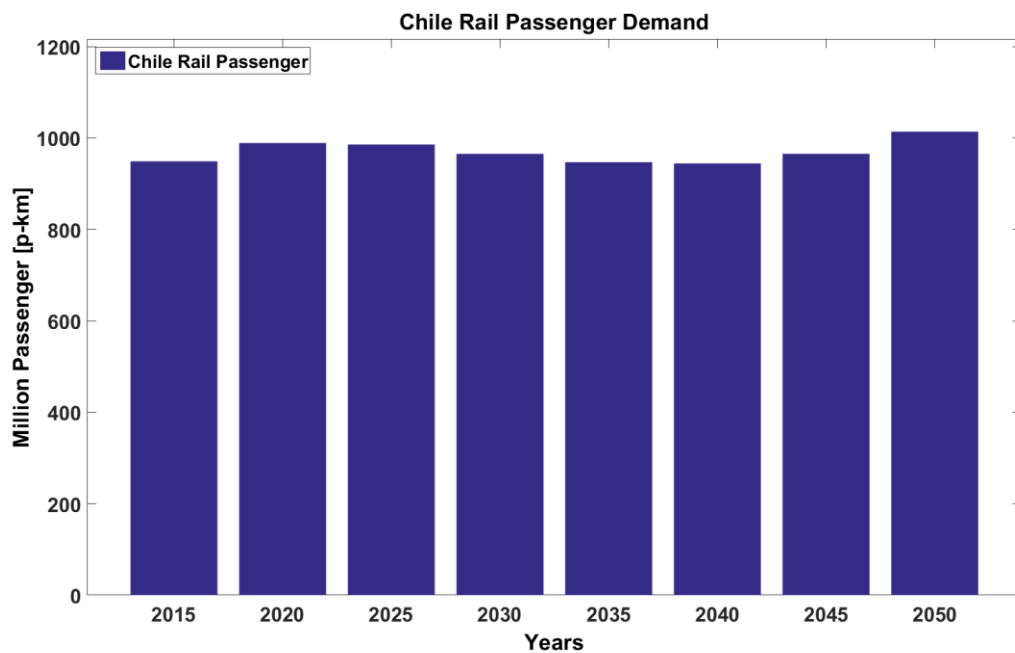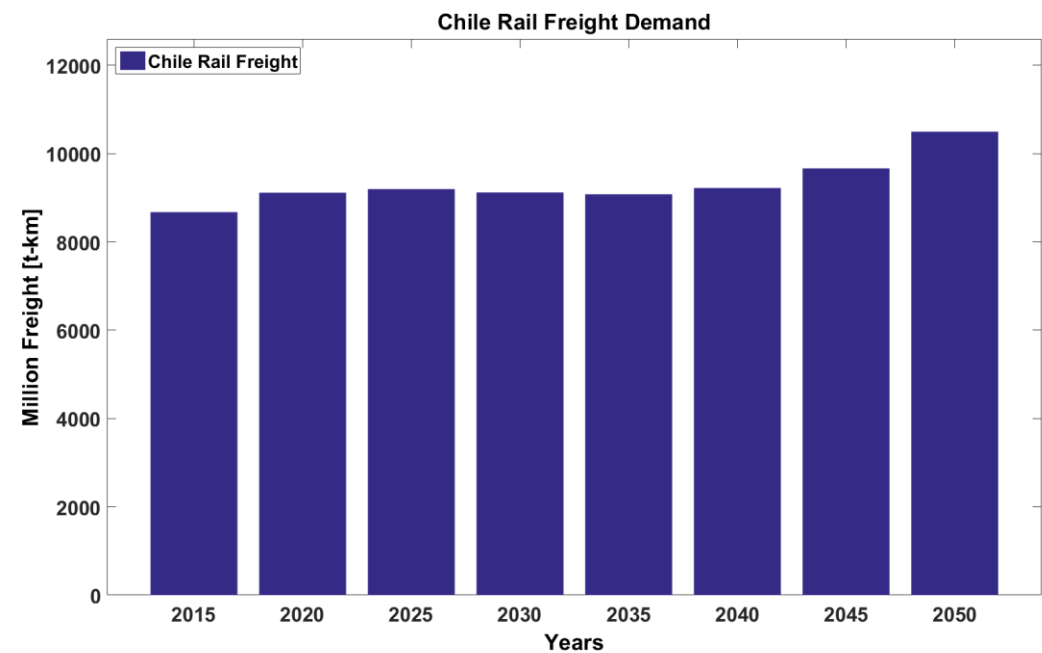

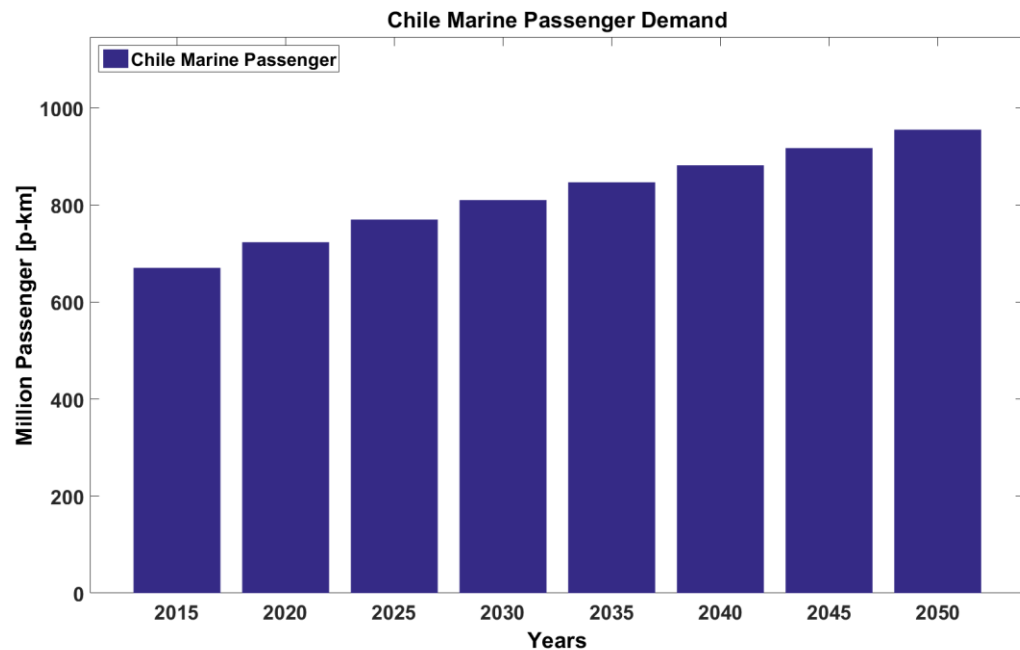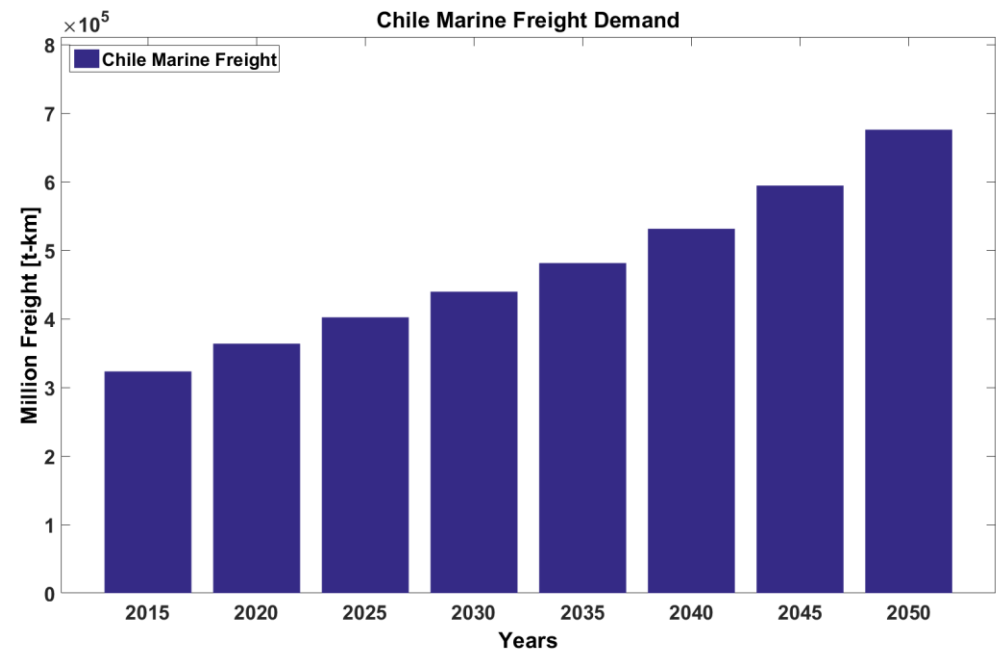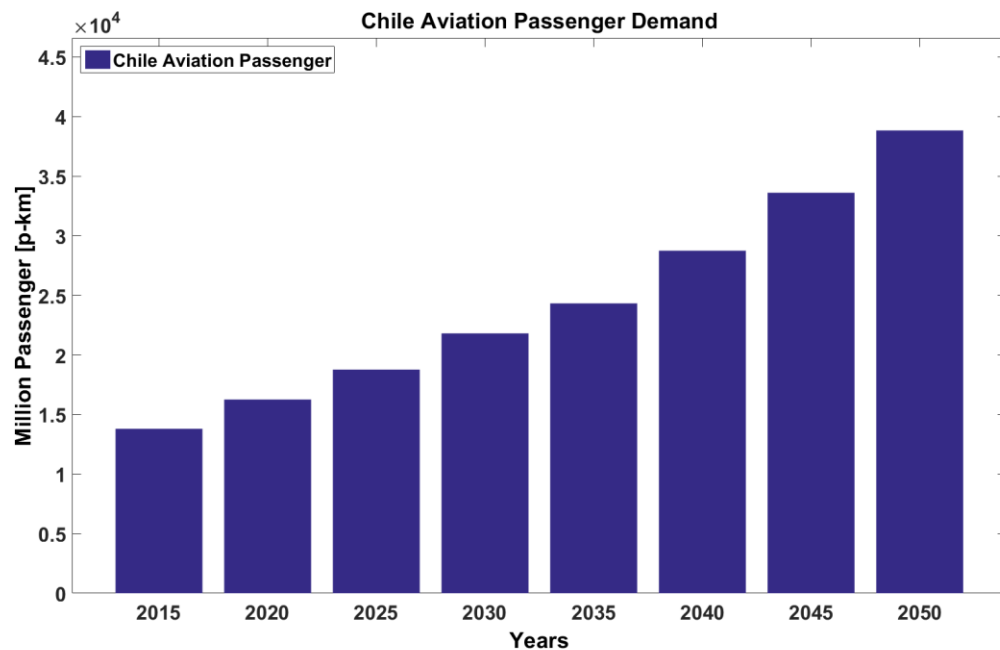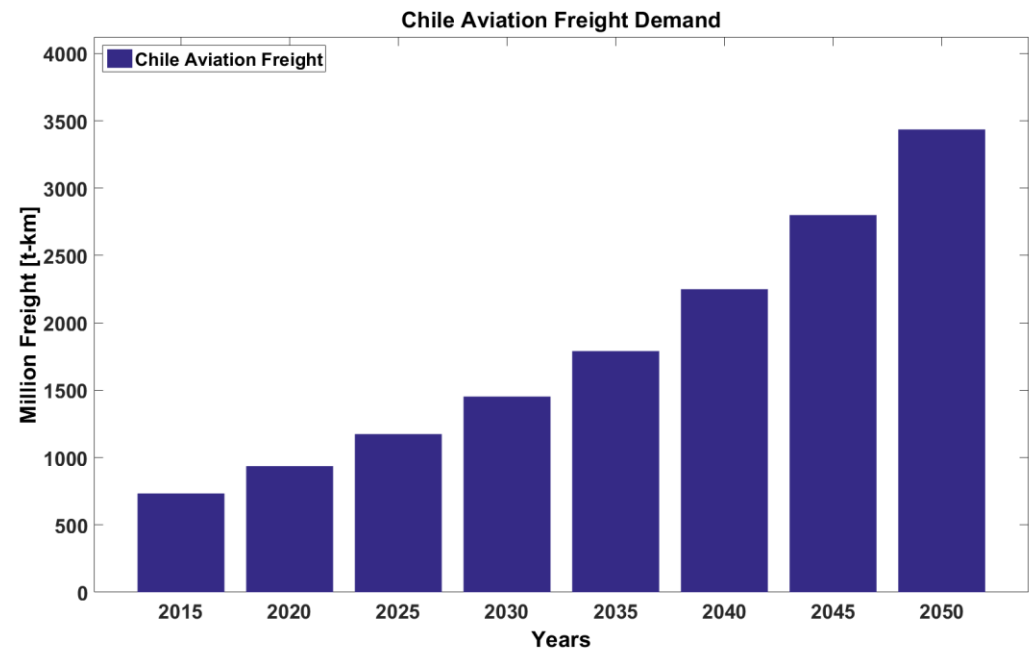

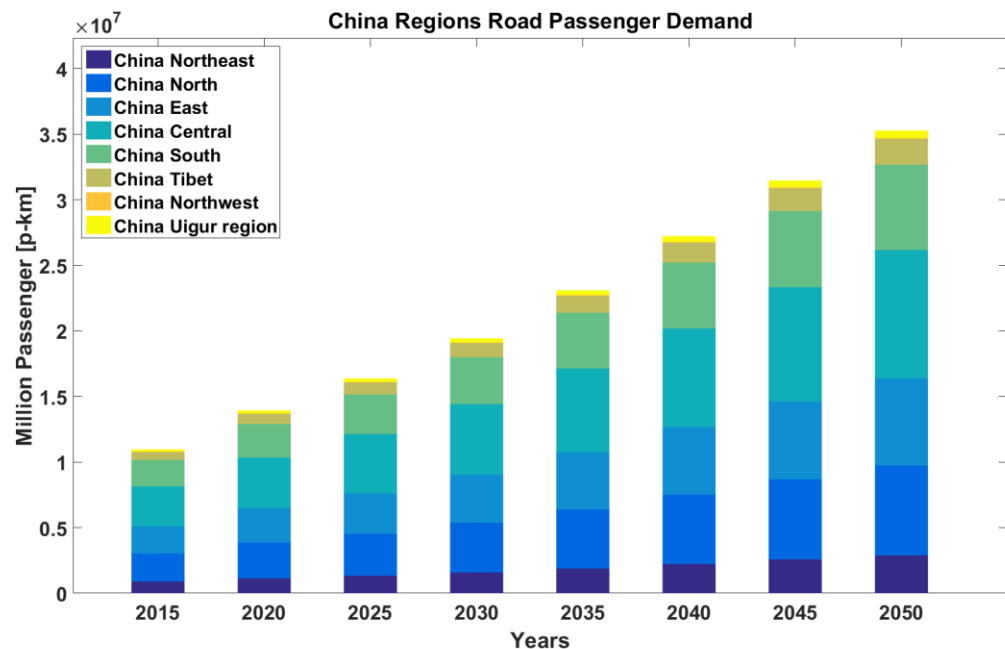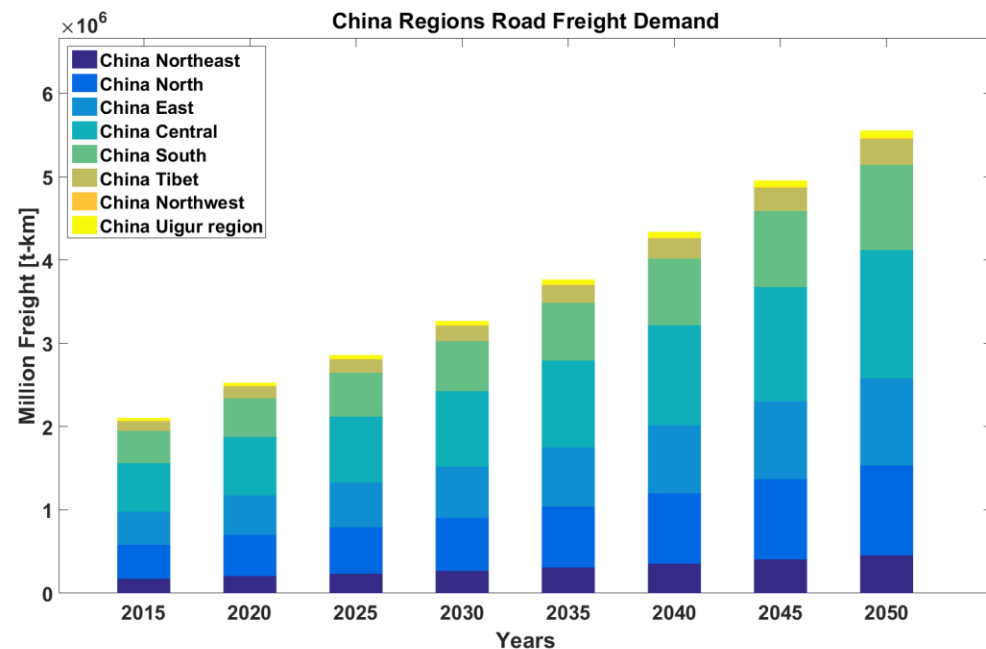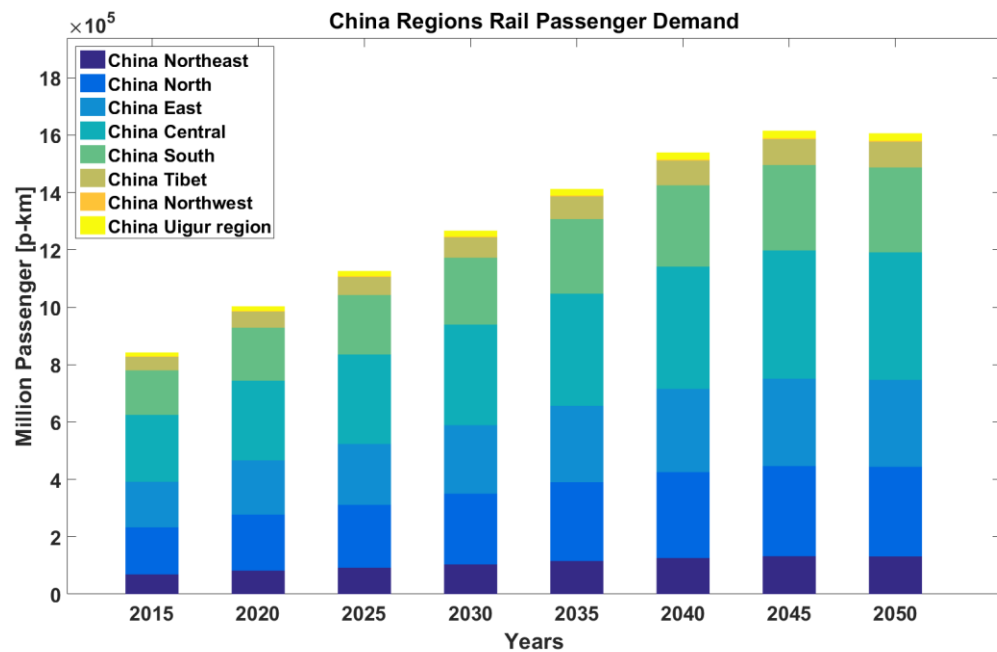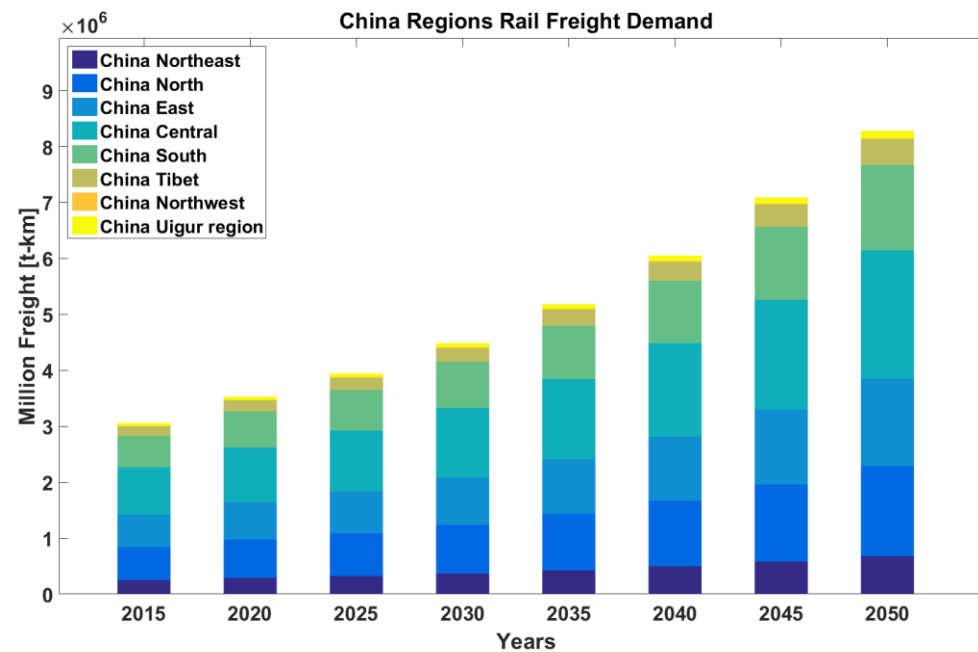

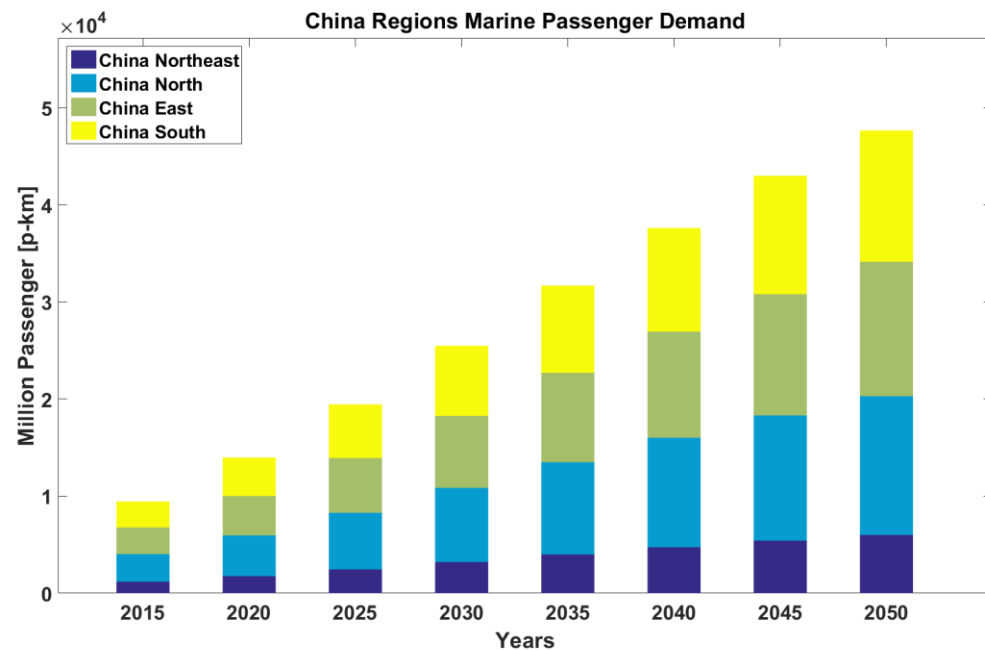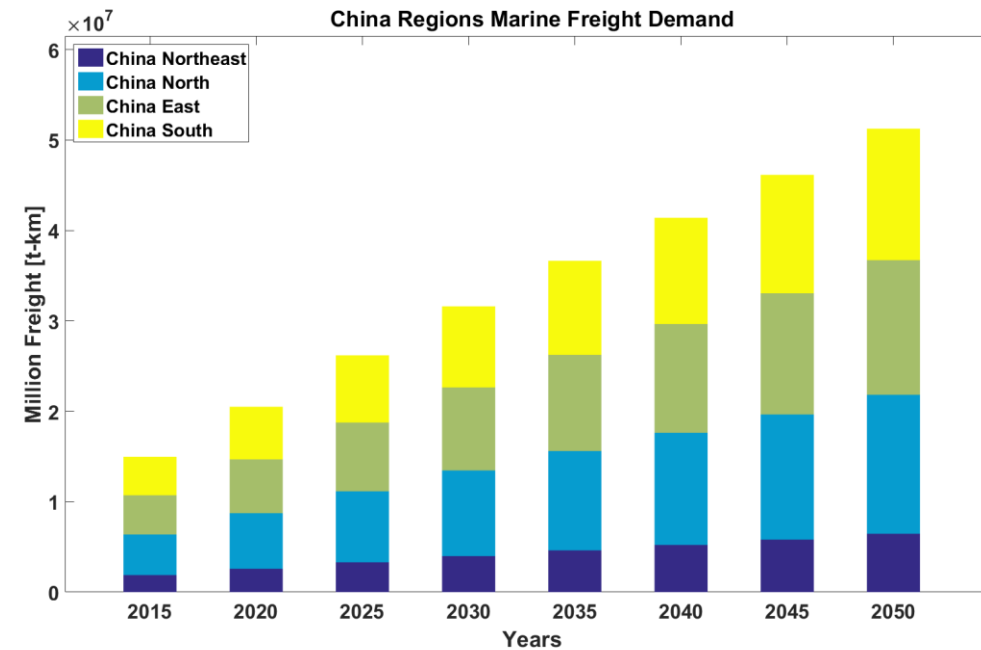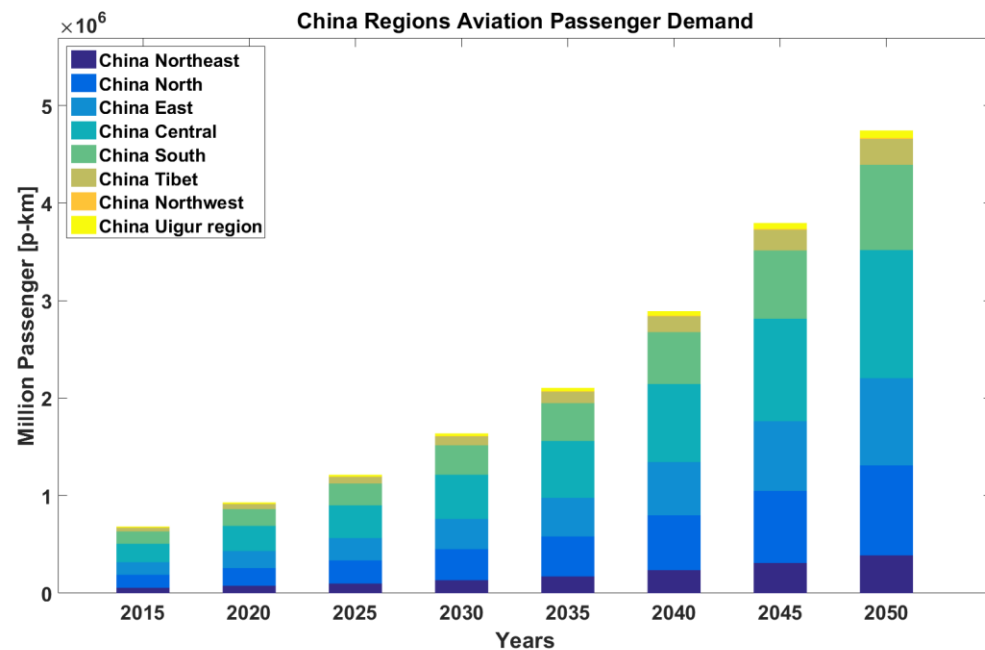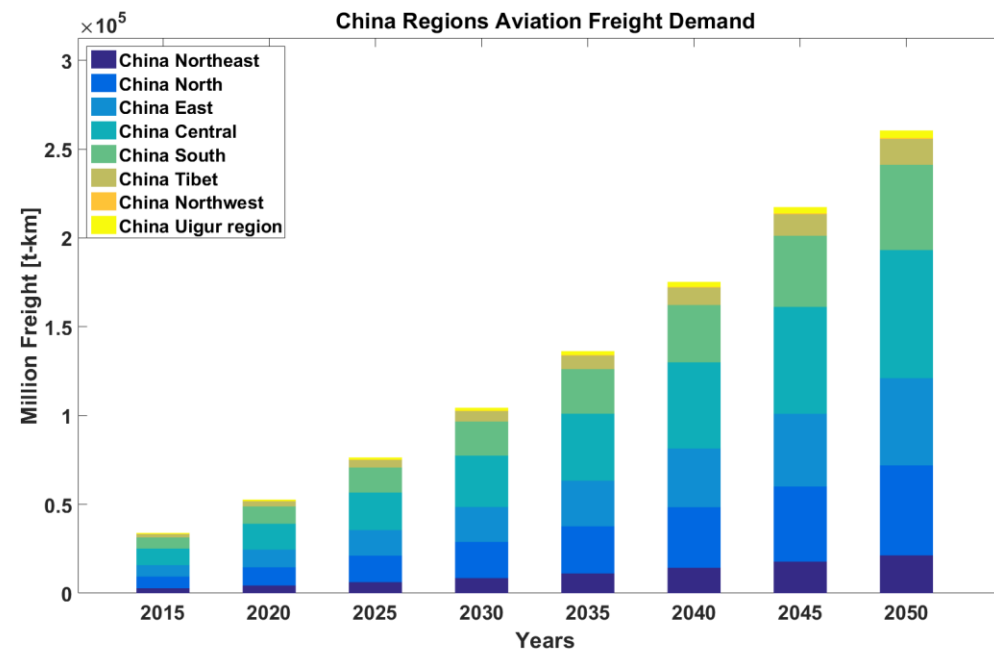

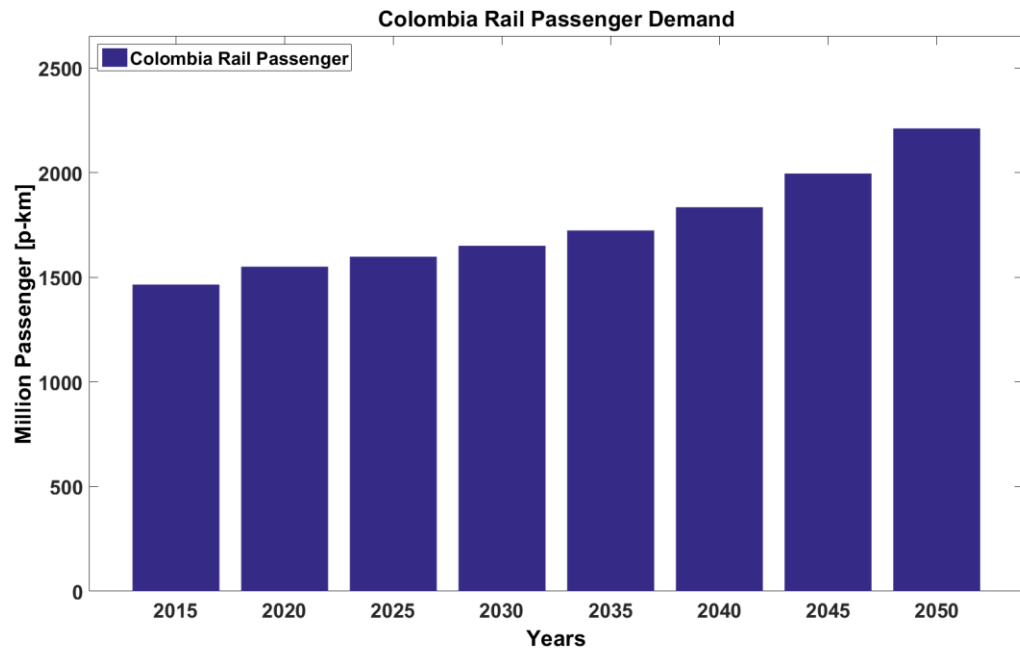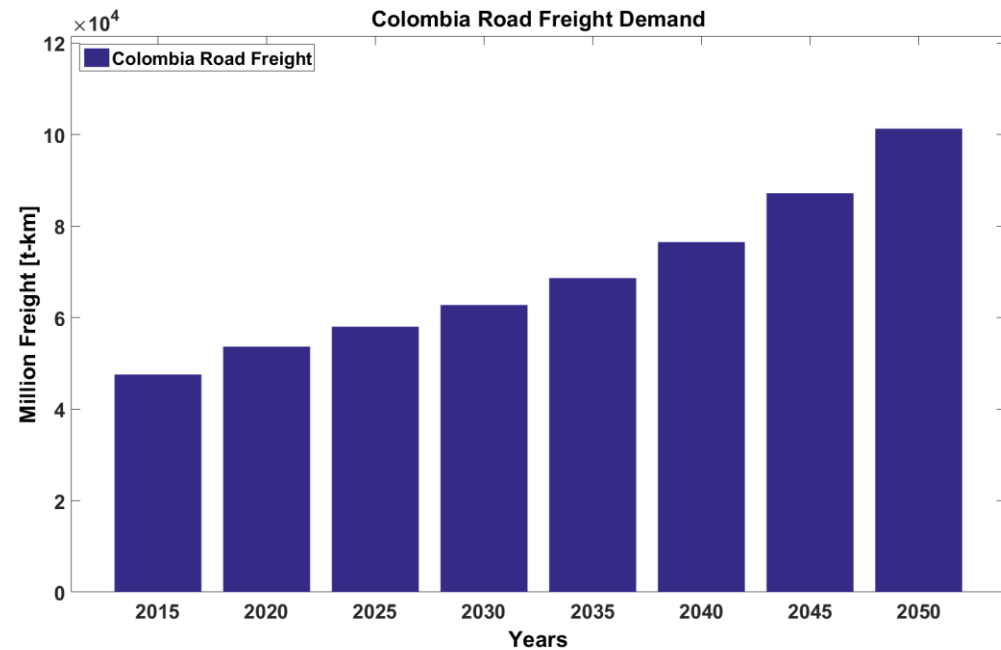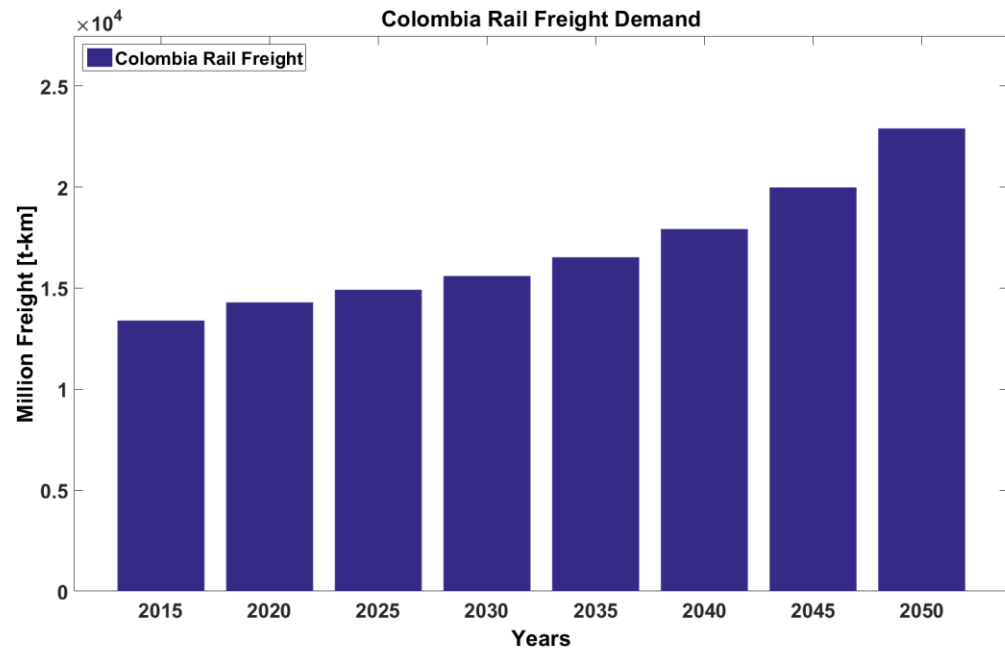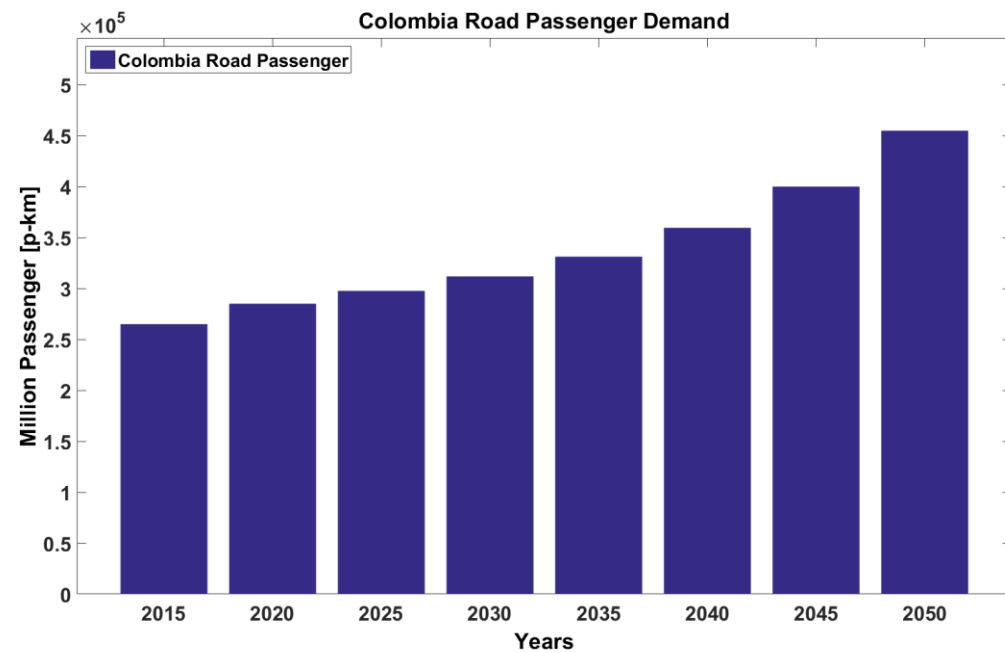

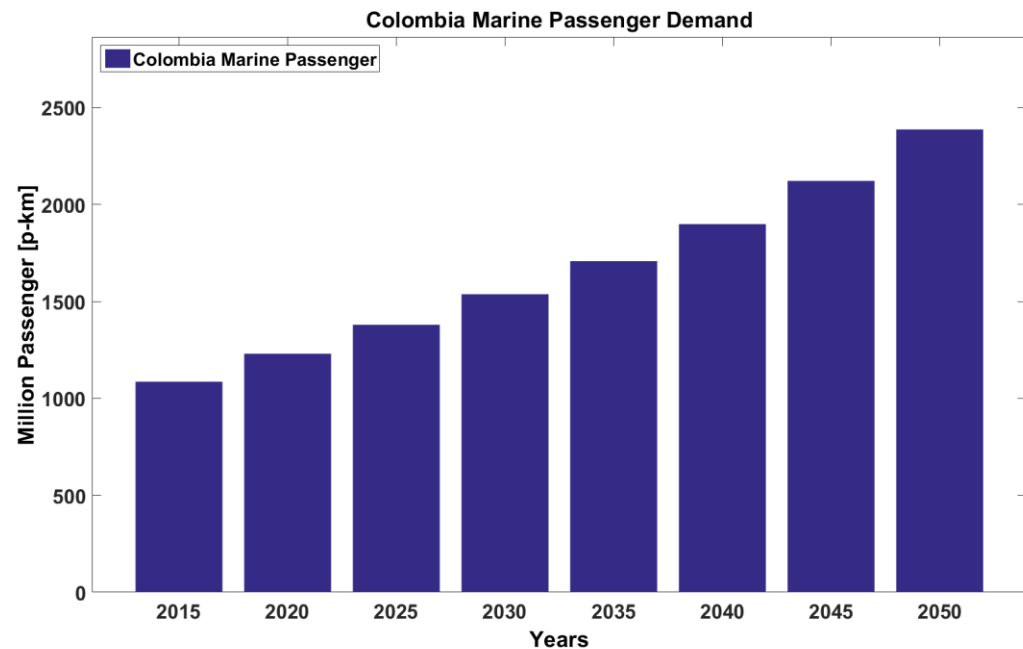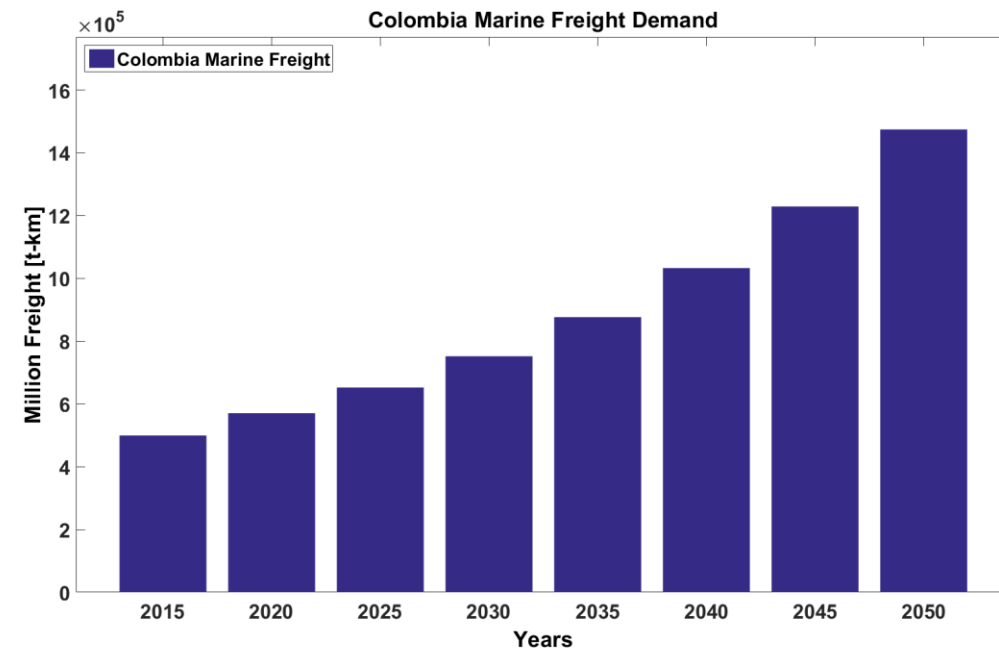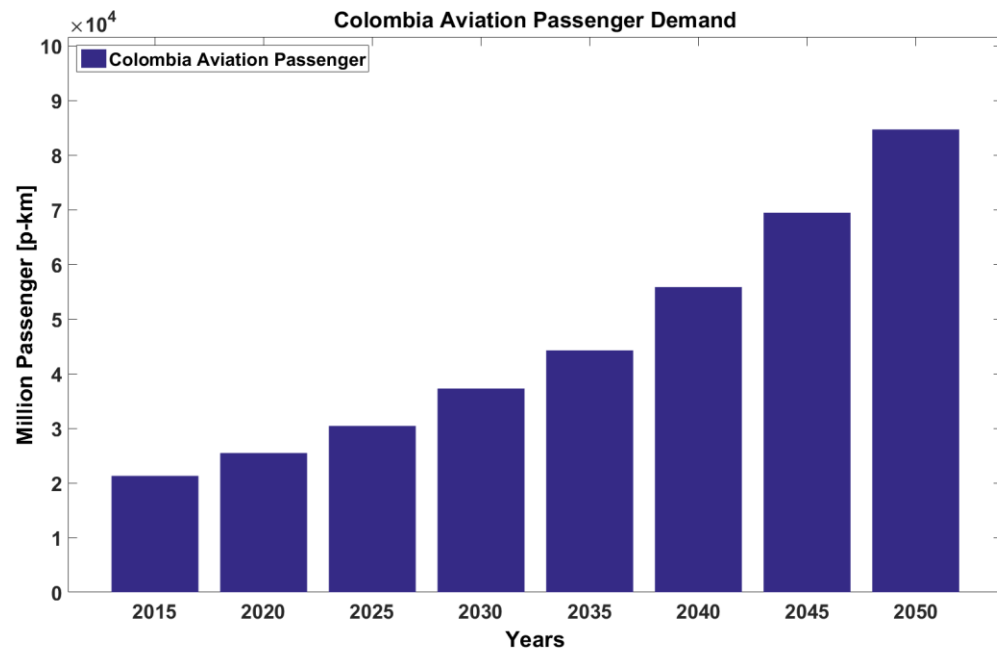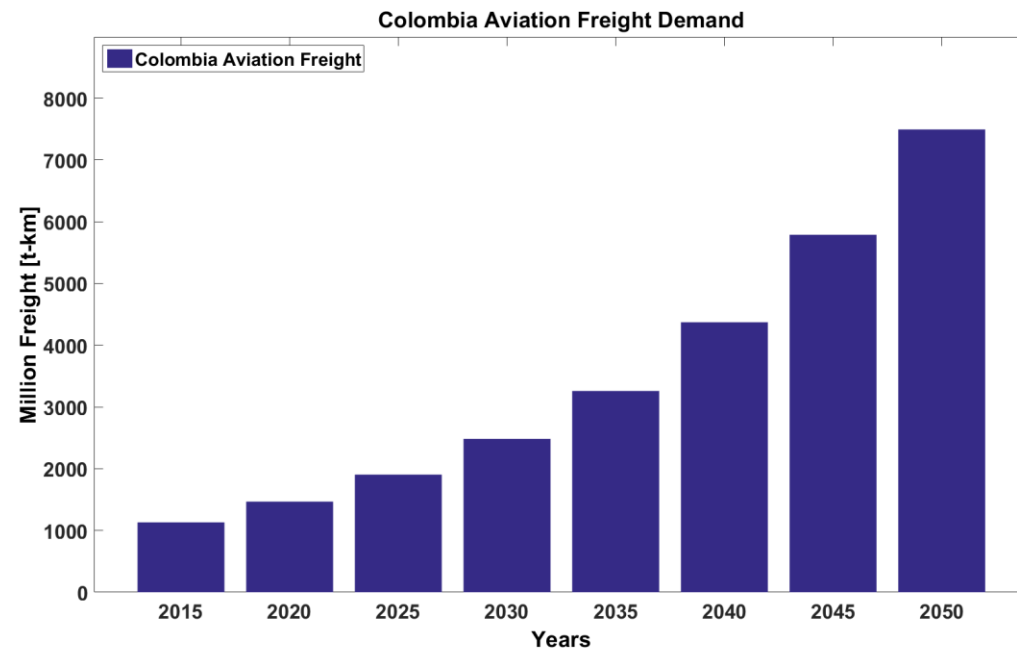

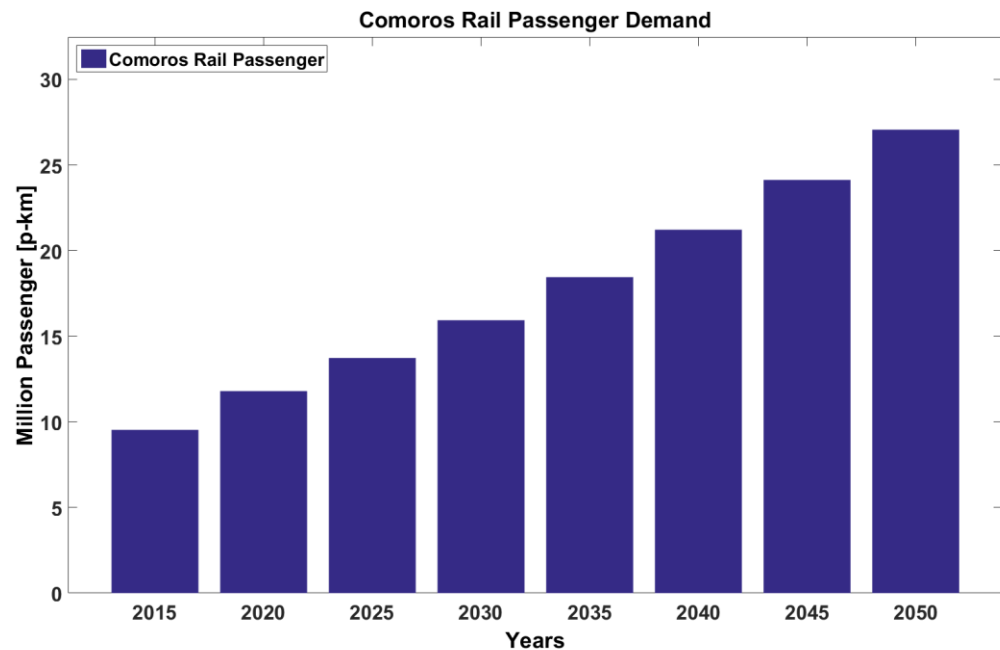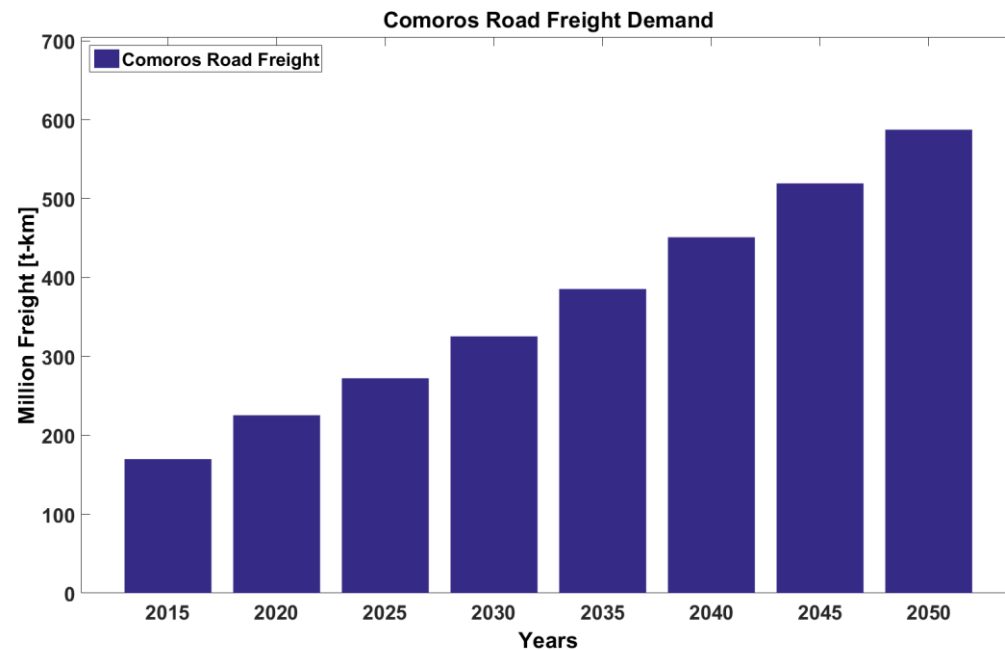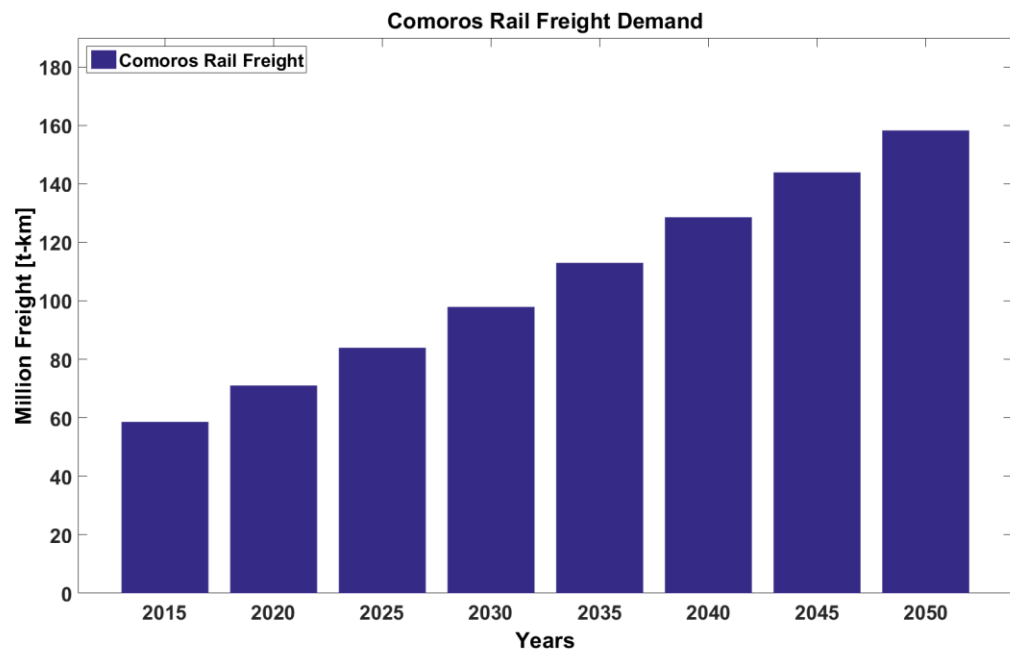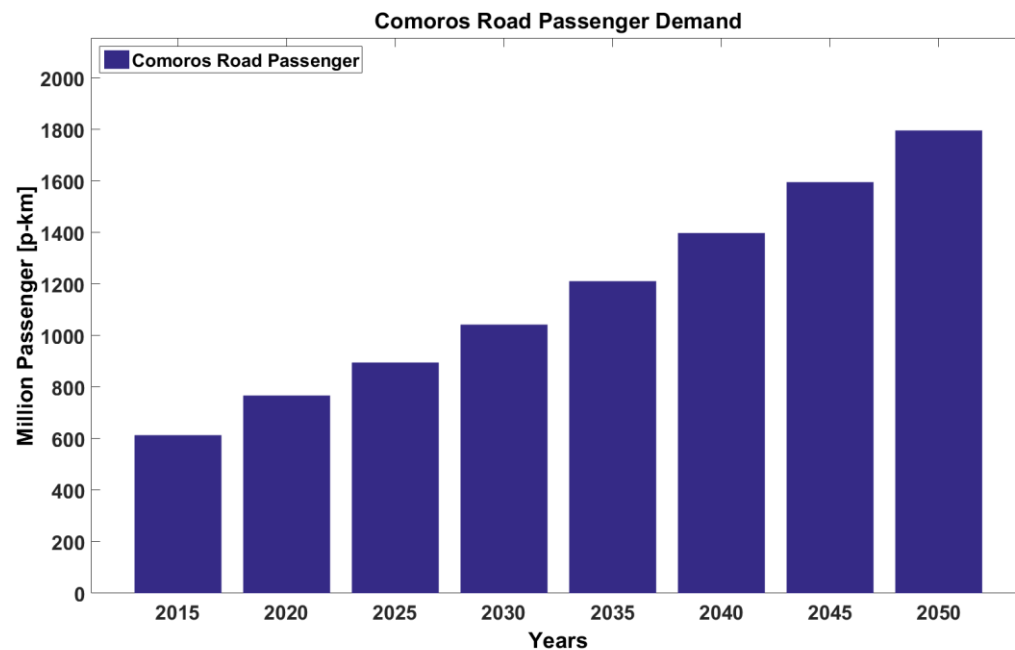

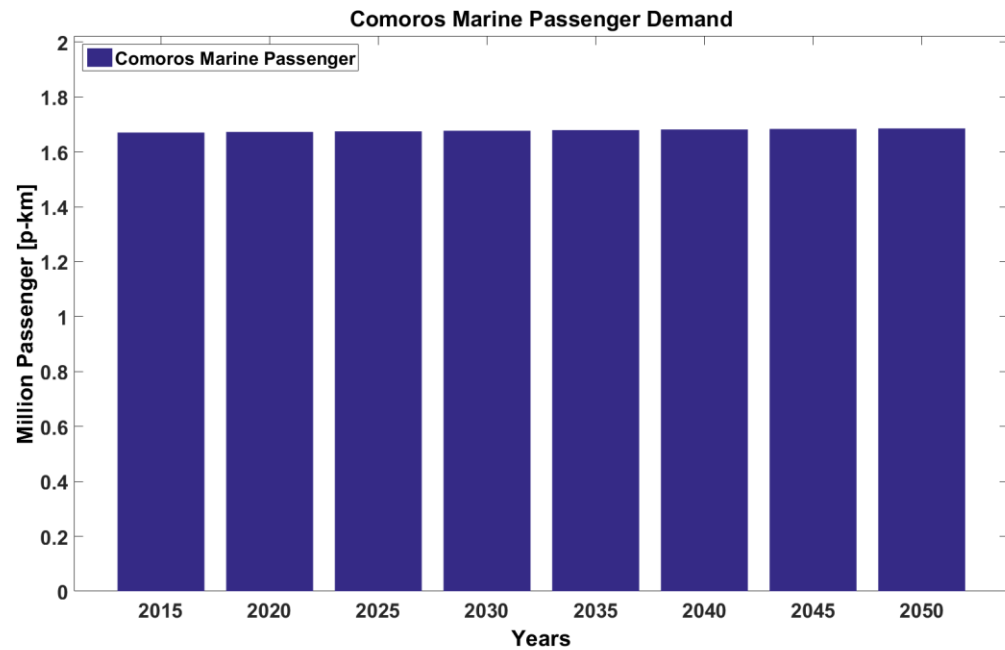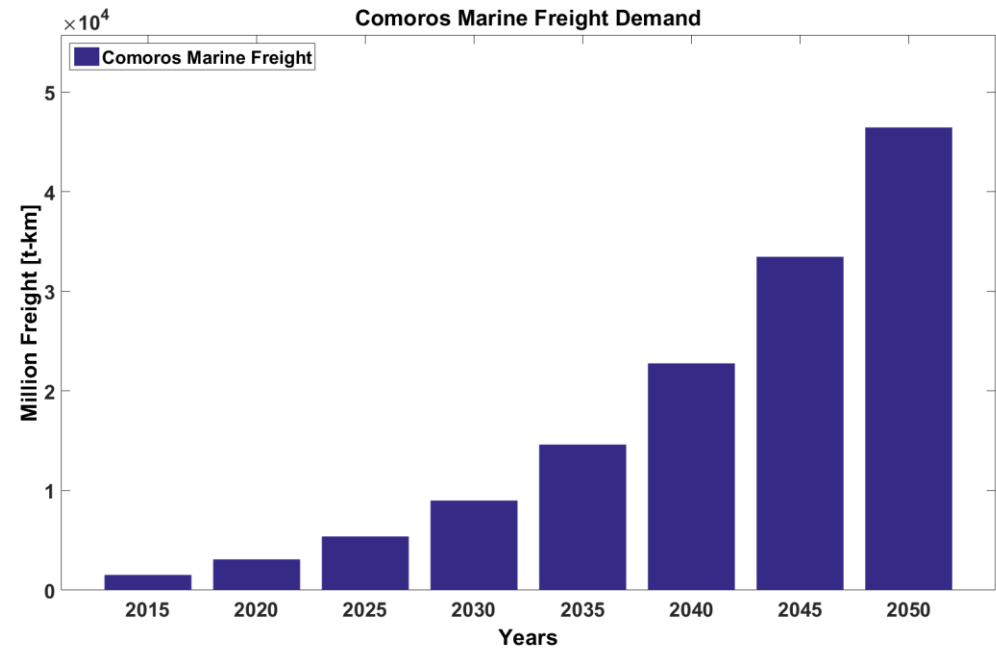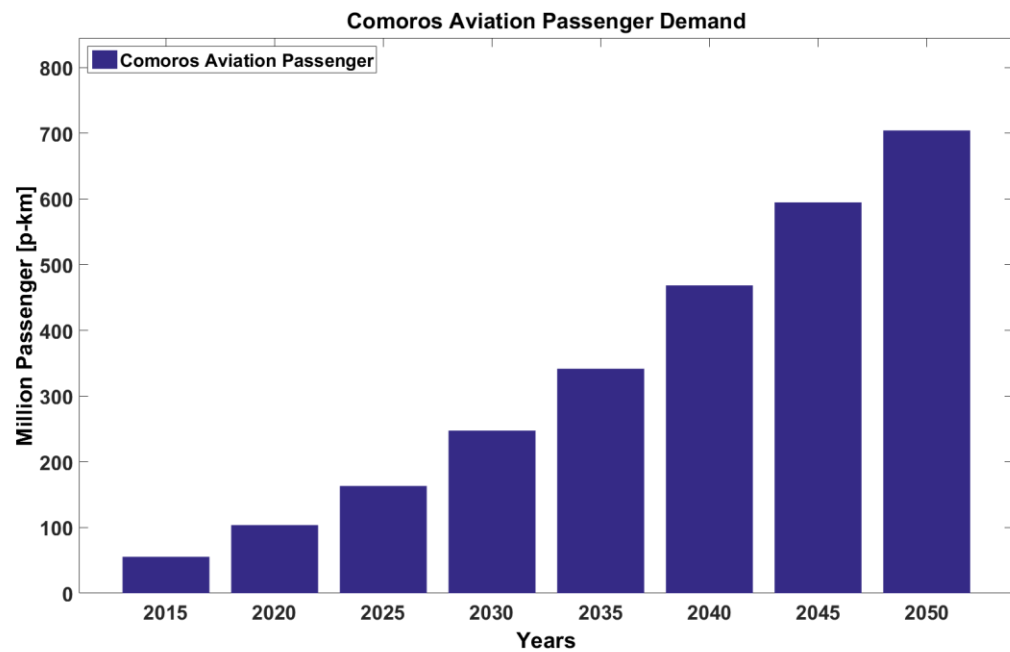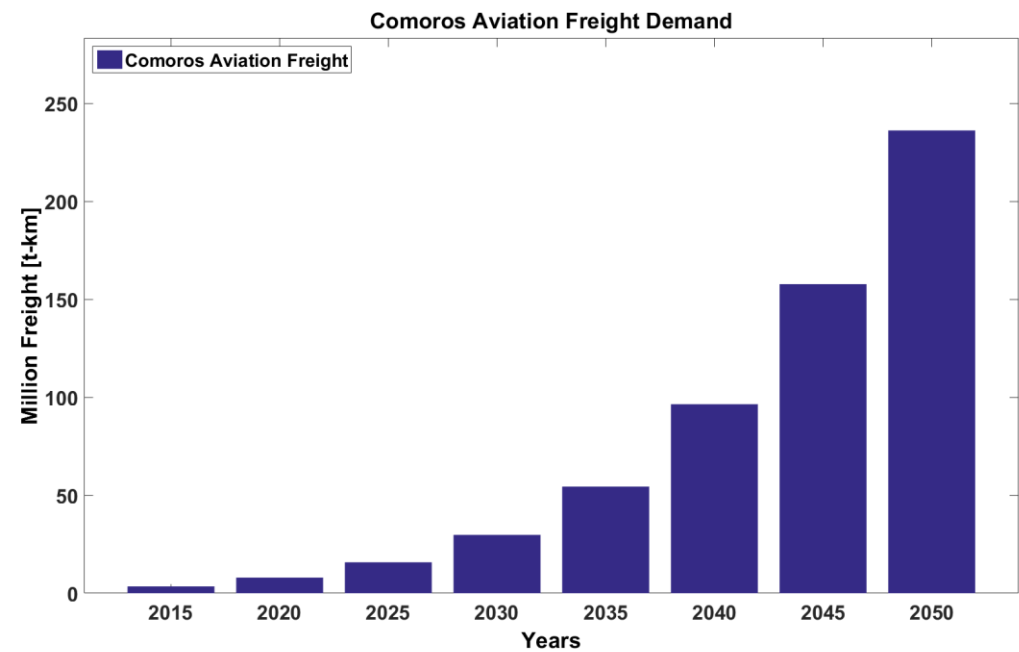

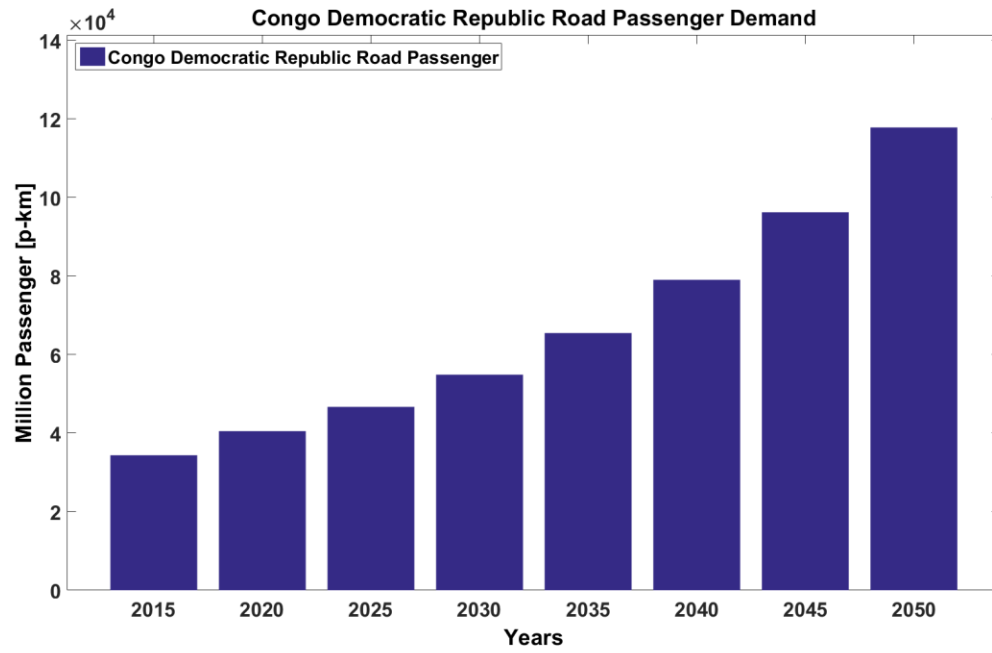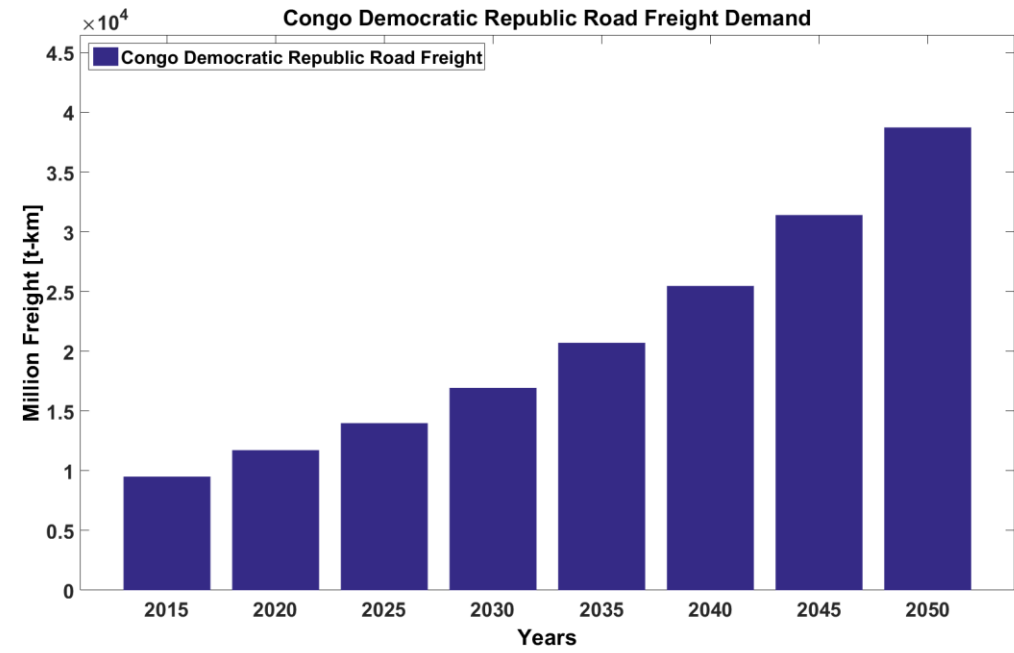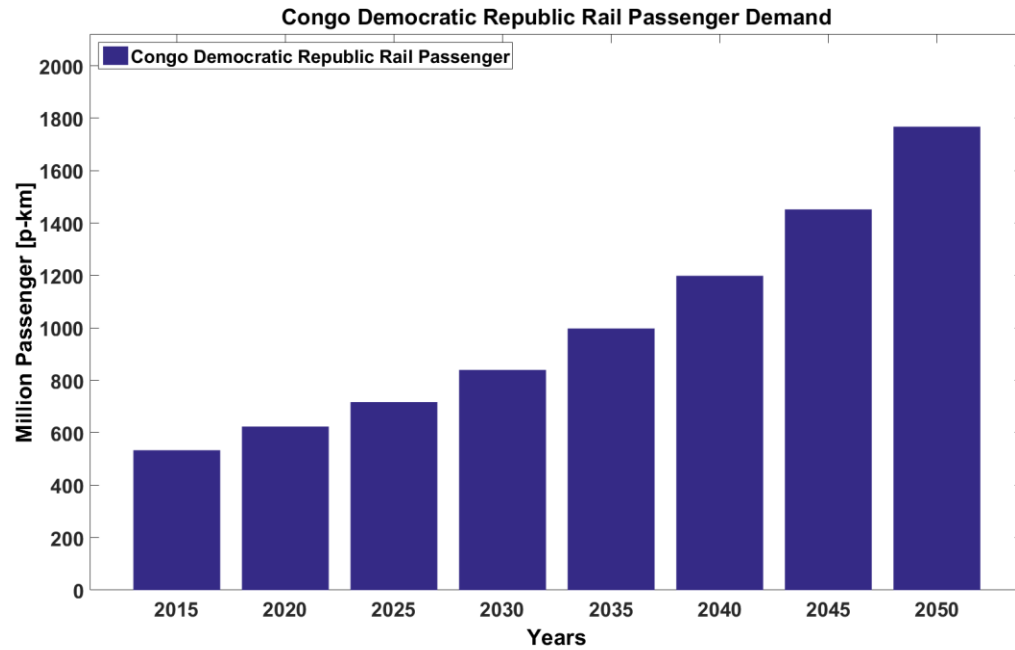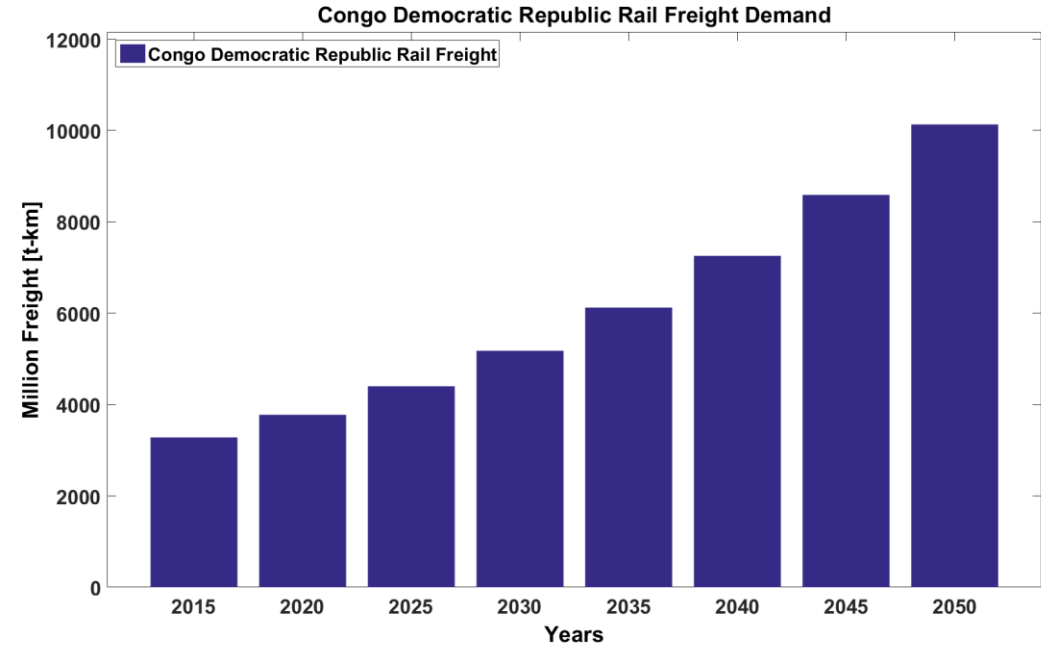

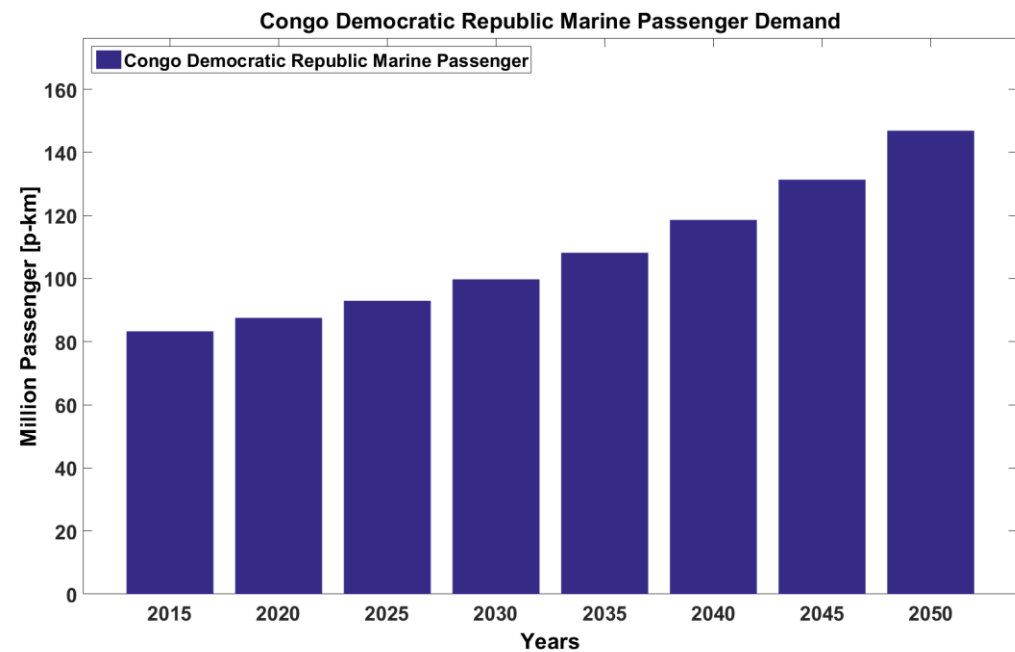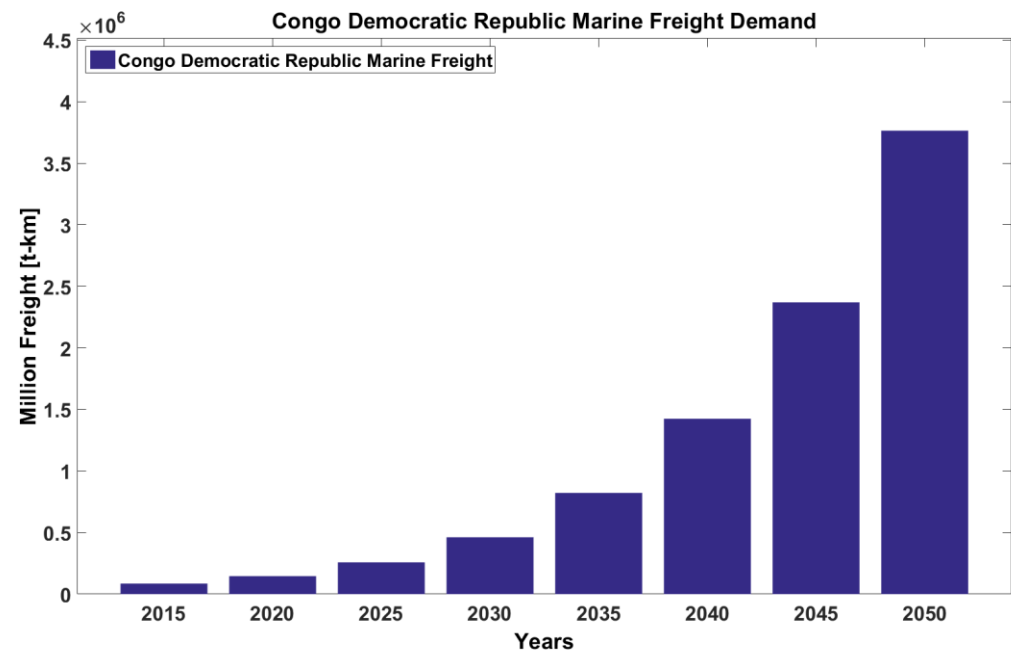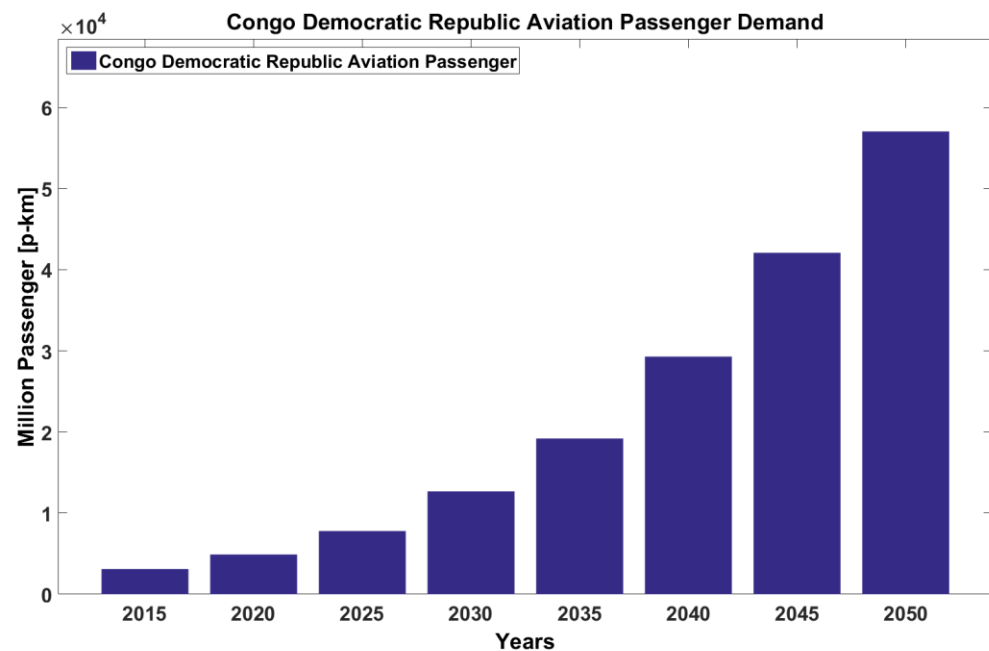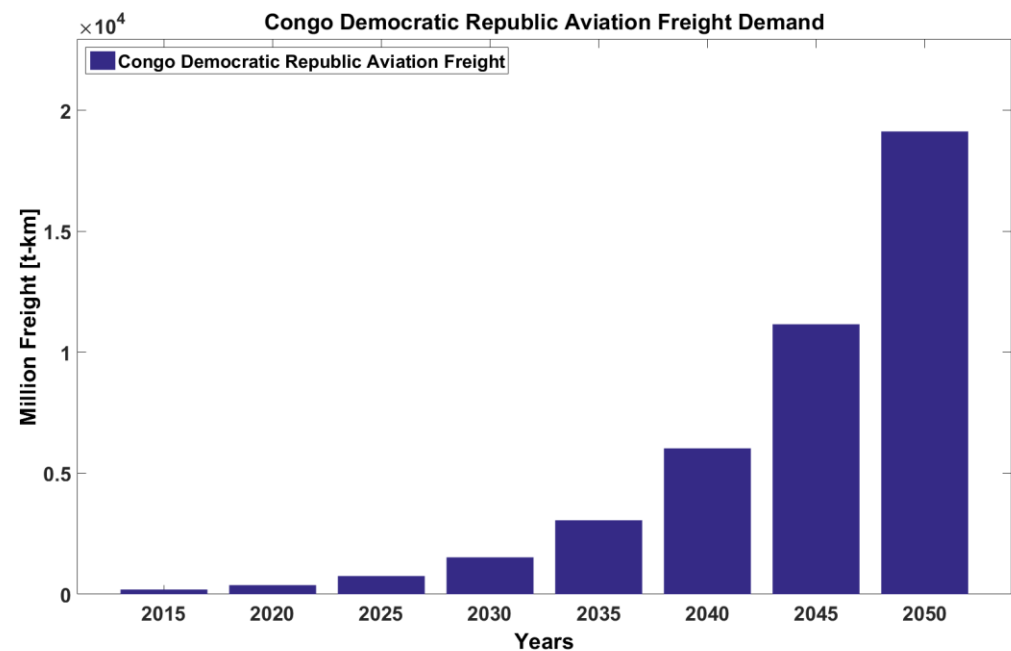

Congo Republic Road Passenger Demand

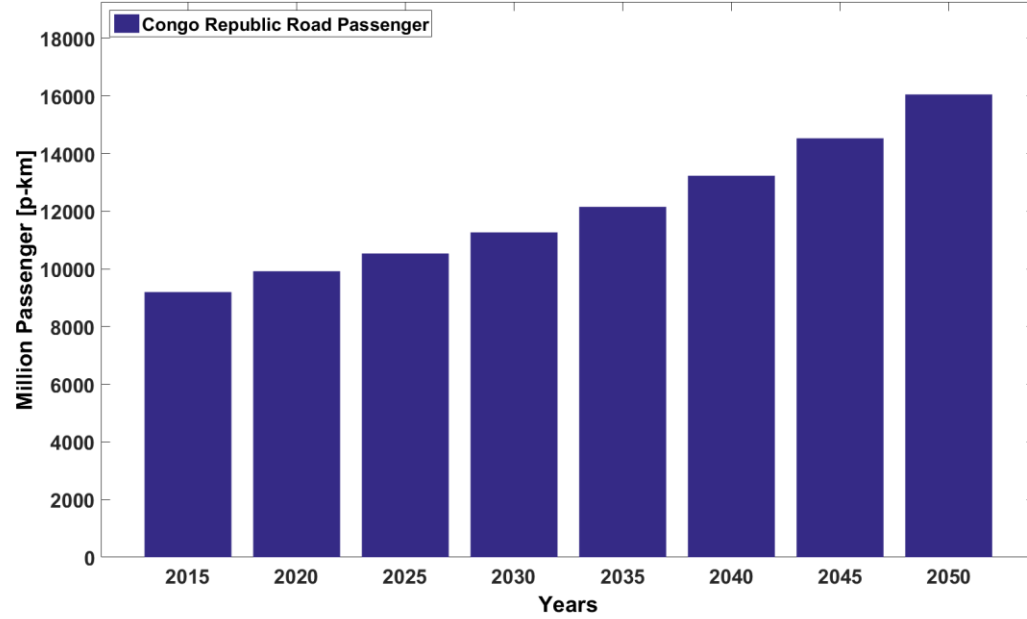

Congo Republic Road Freight Demand

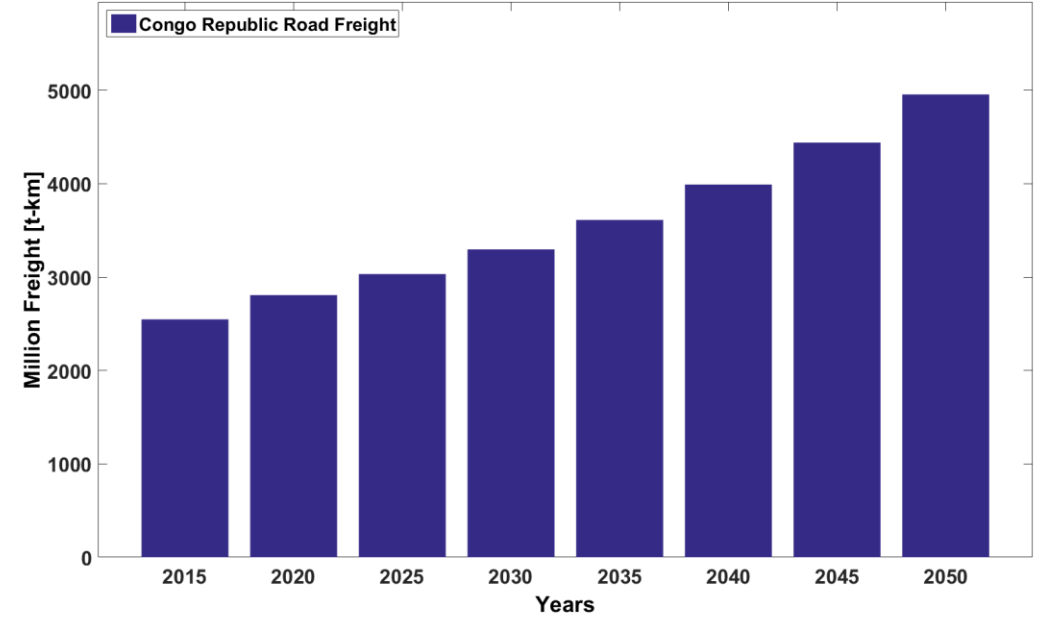

Congo Republic Rail Passenger Demand

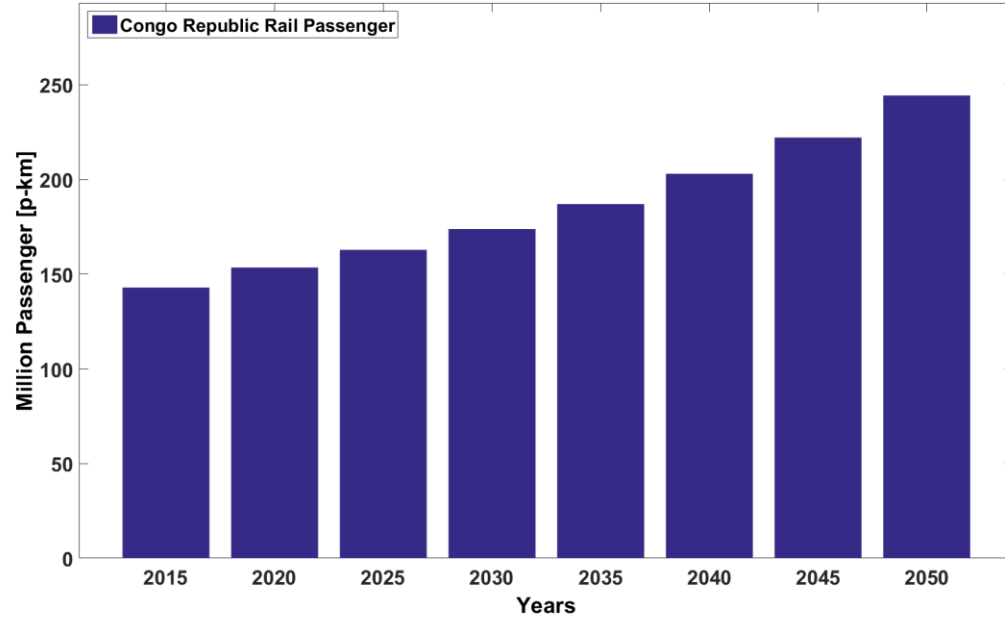

Congo Republic Rail Freight Demand

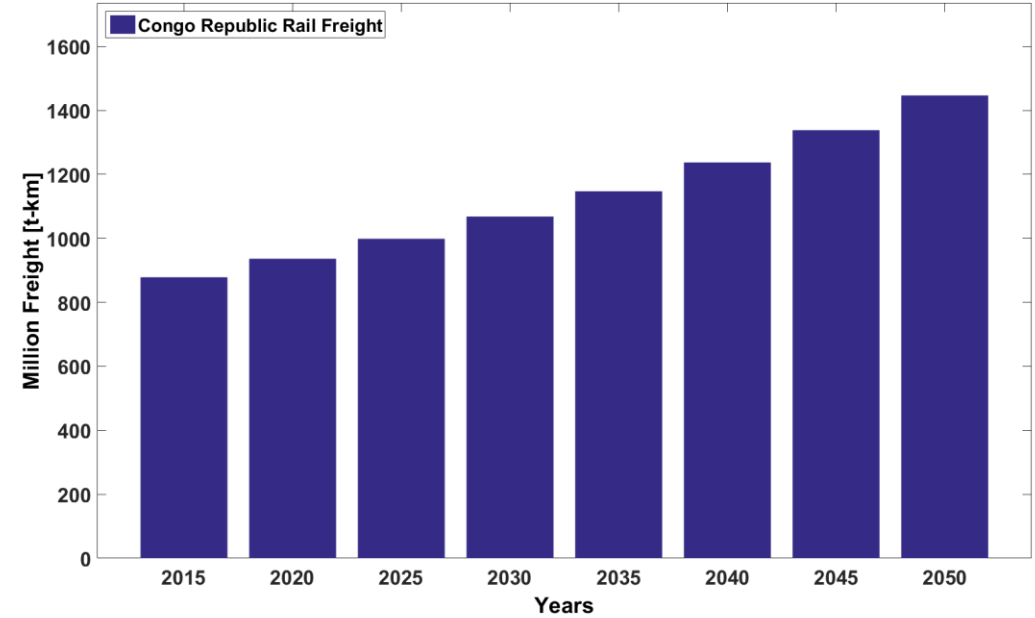

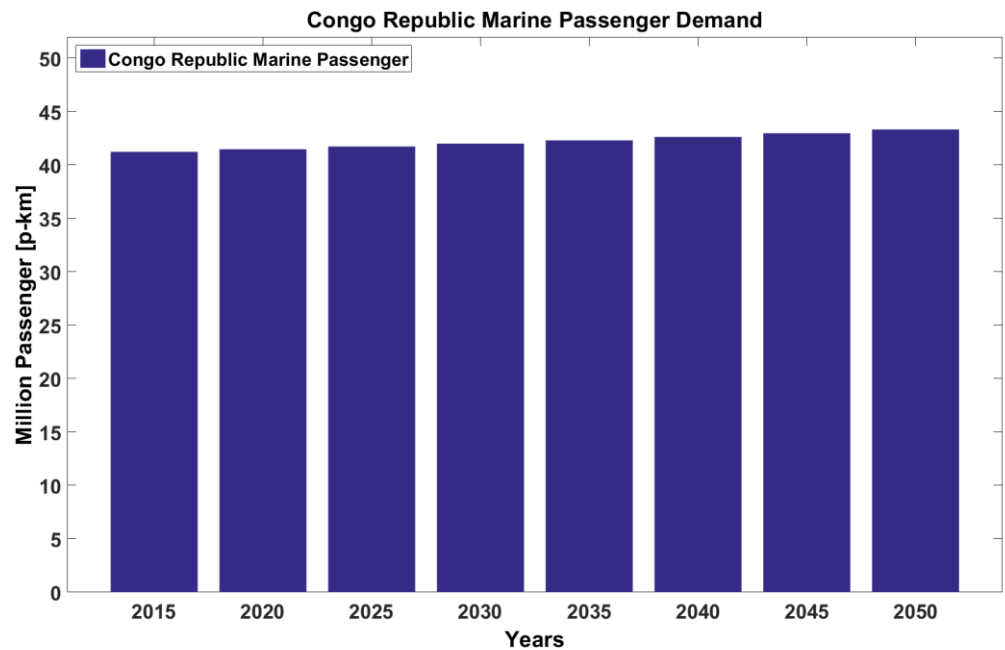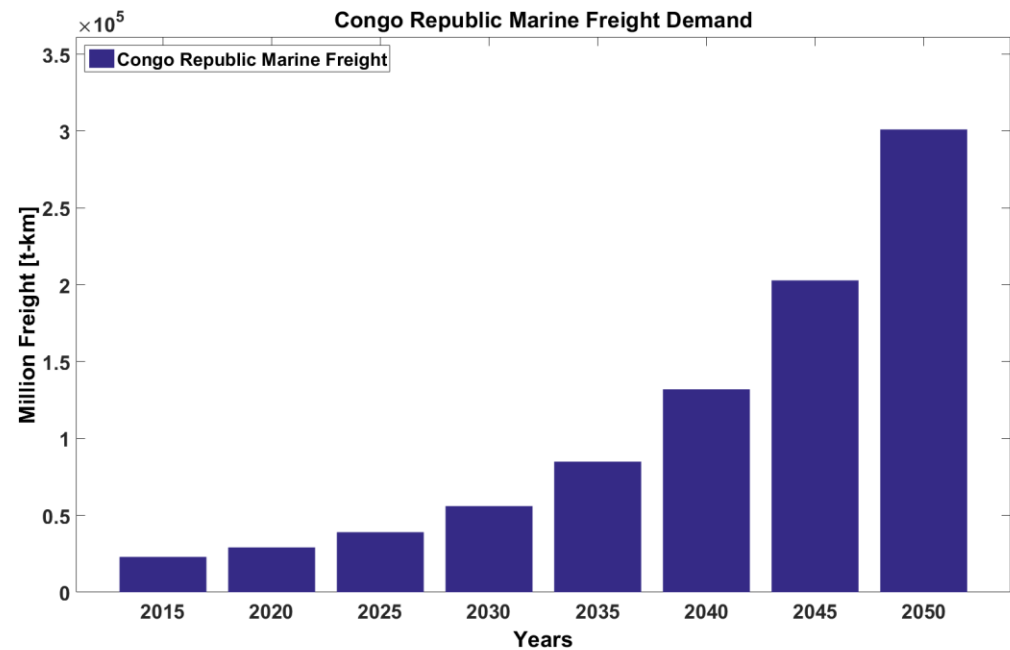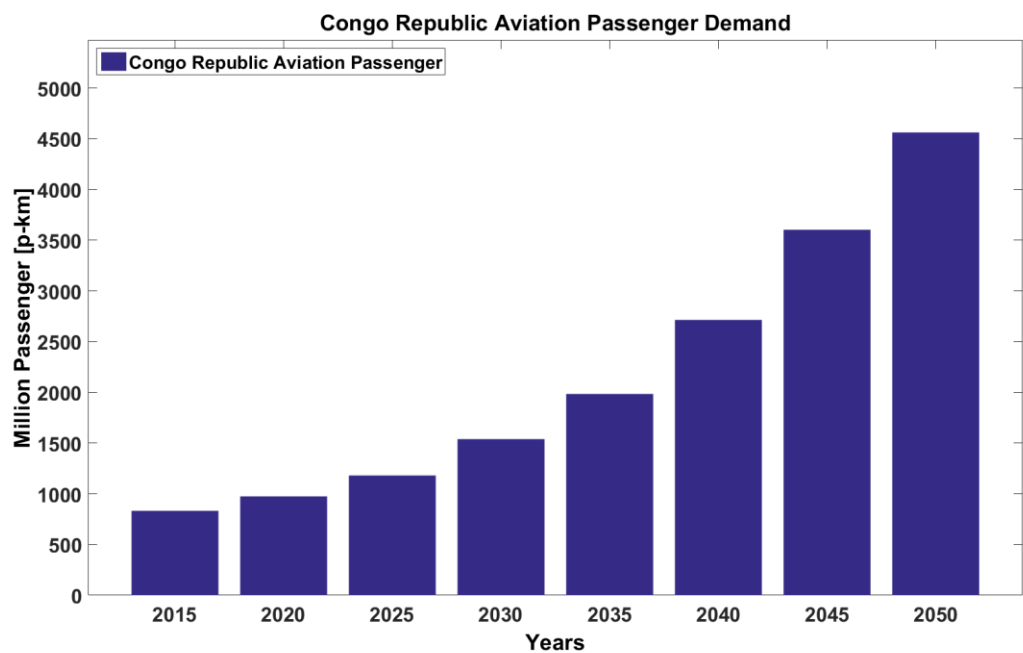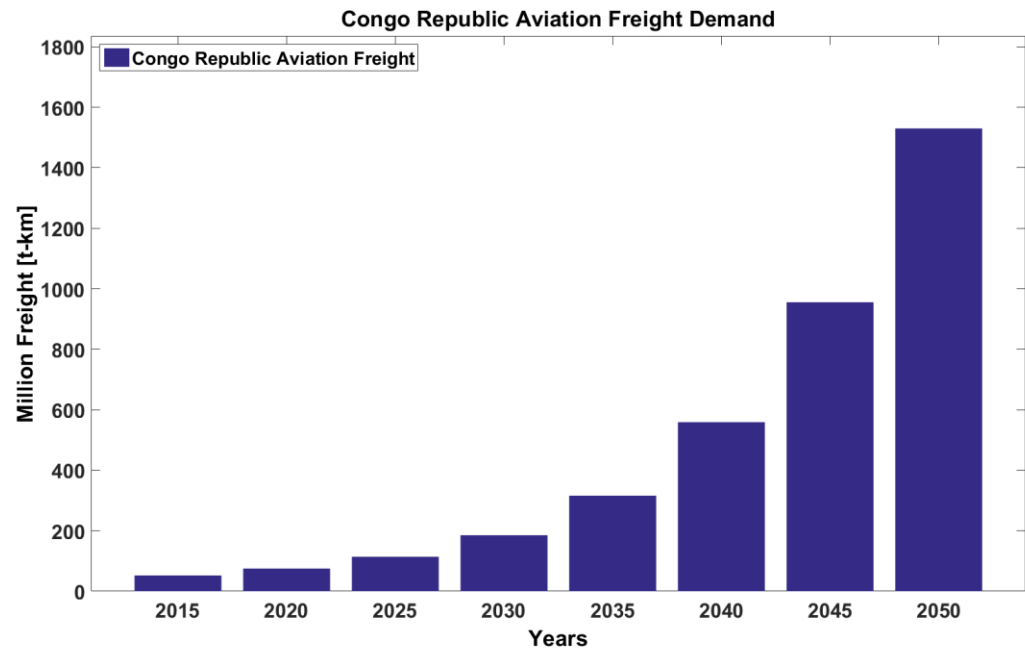

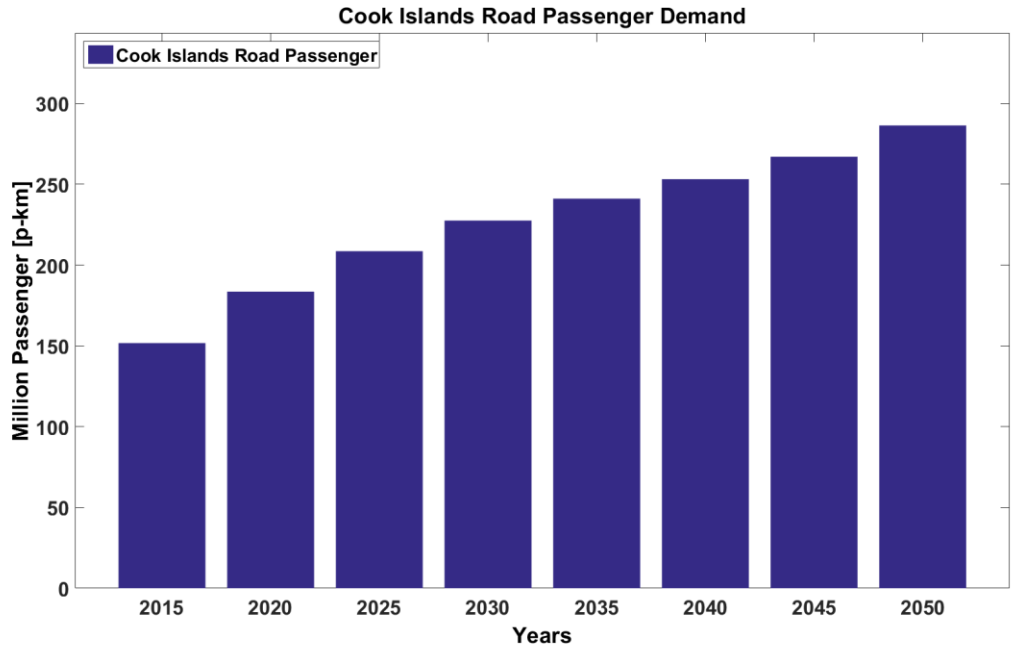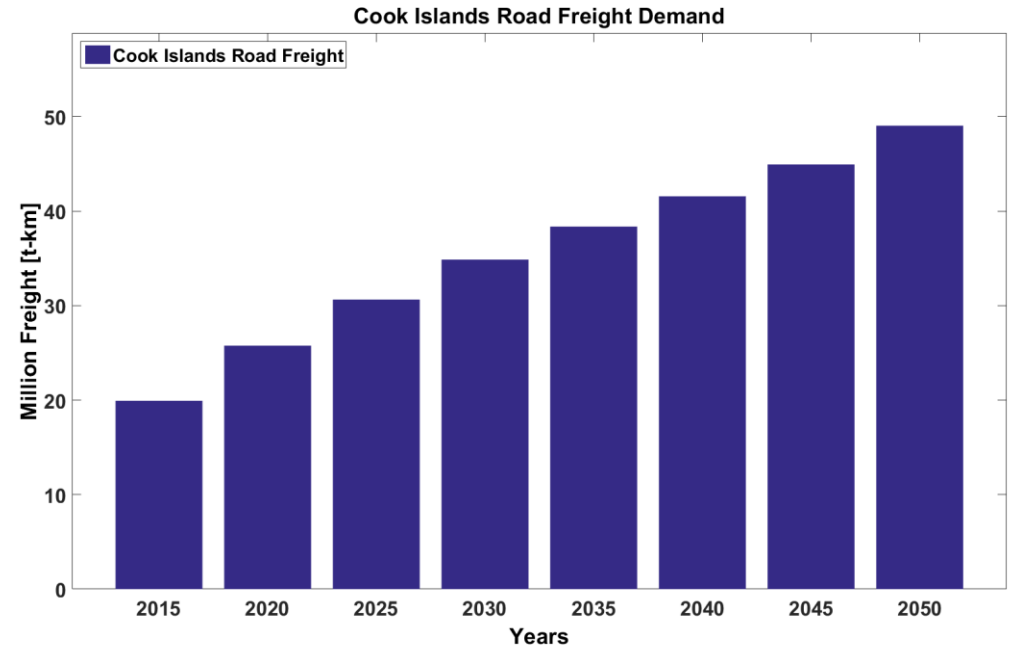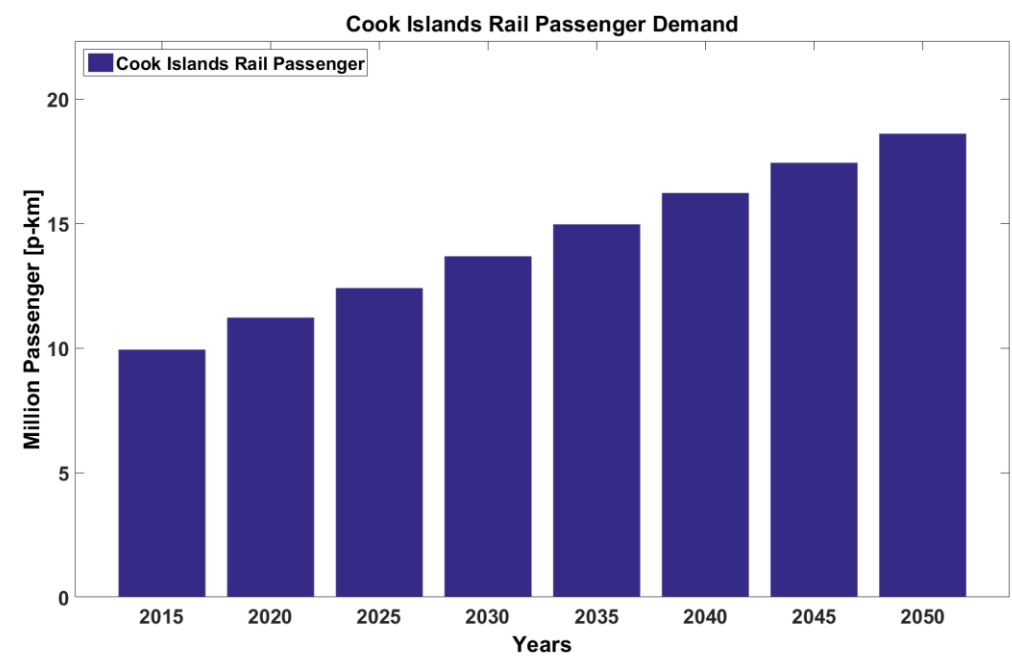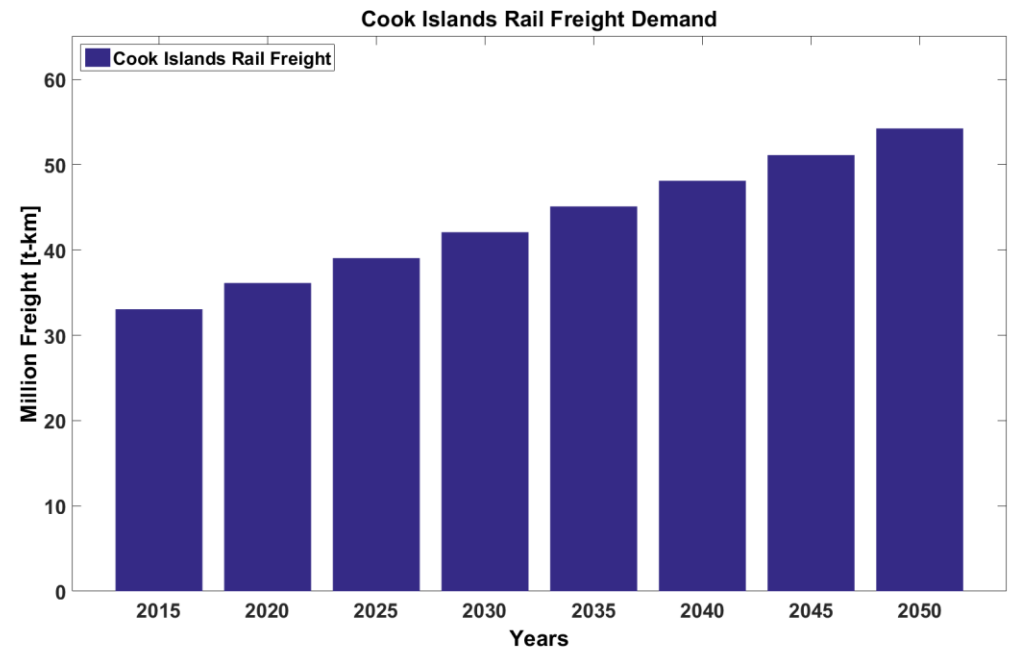

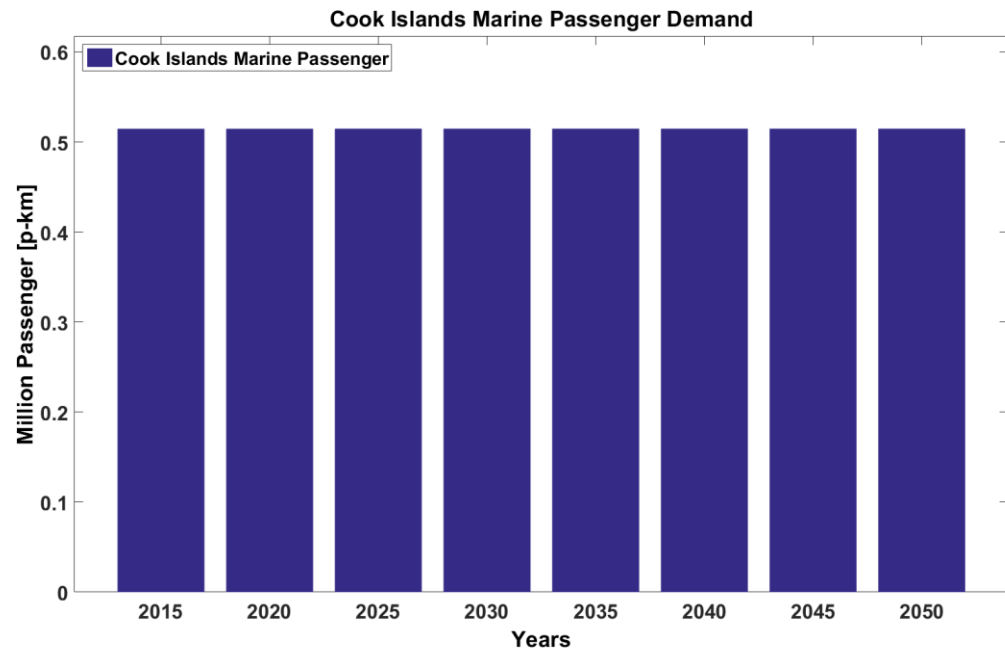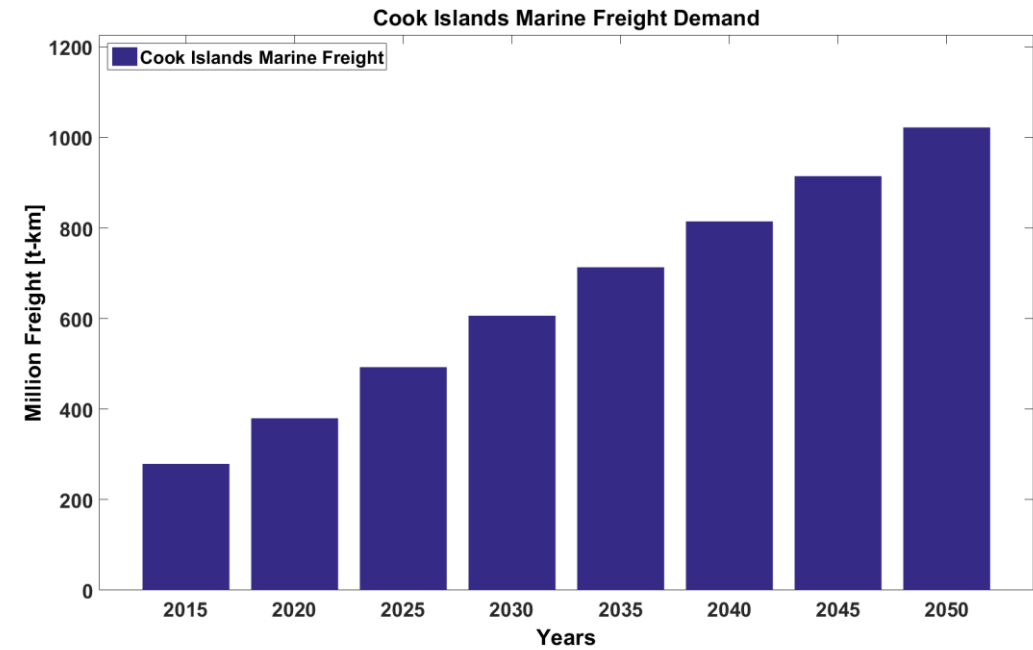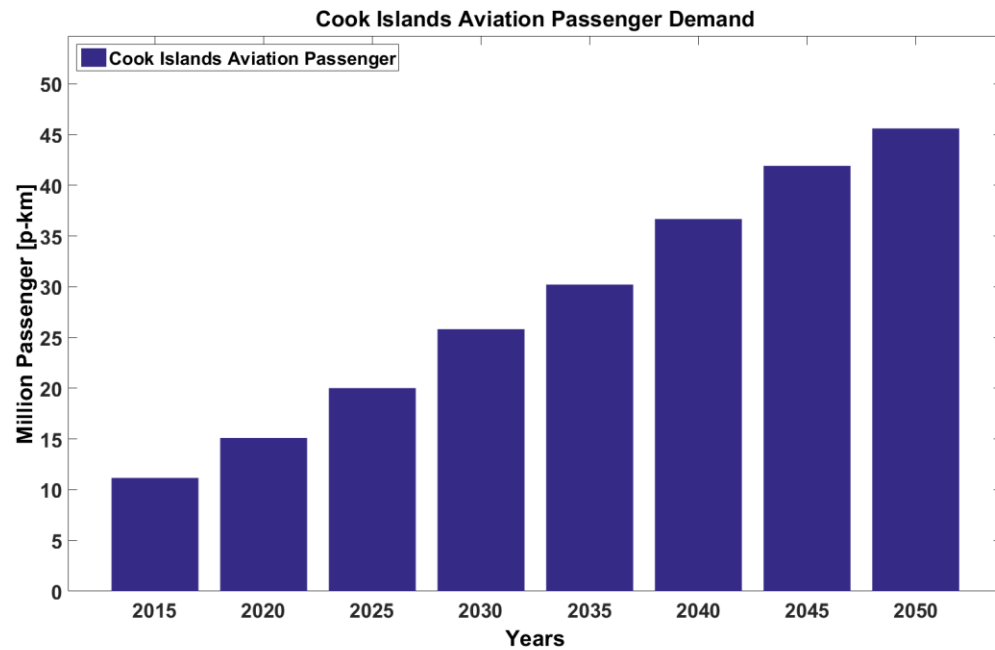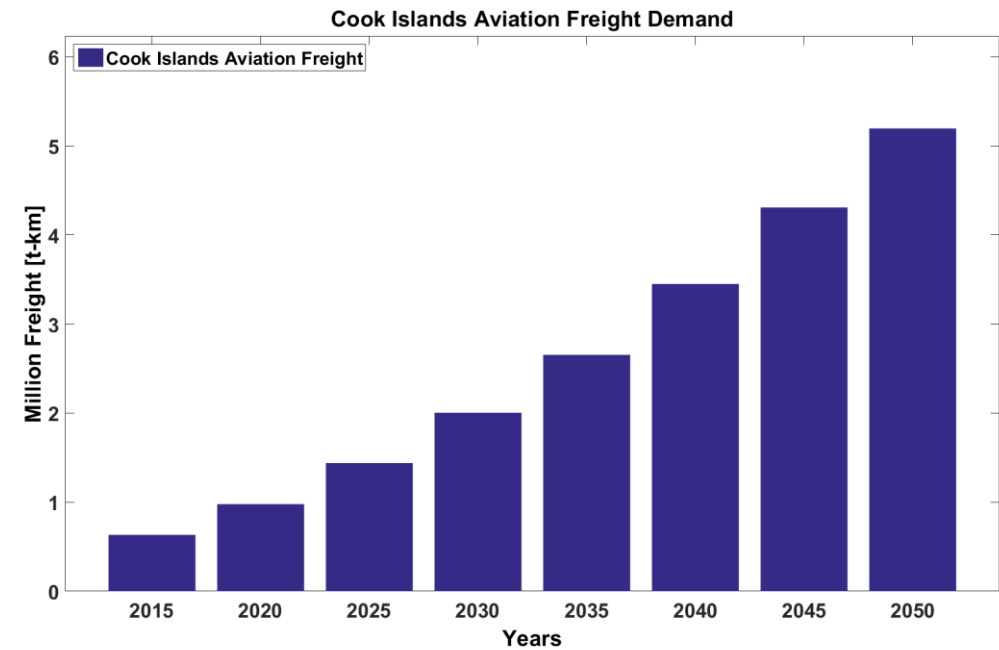

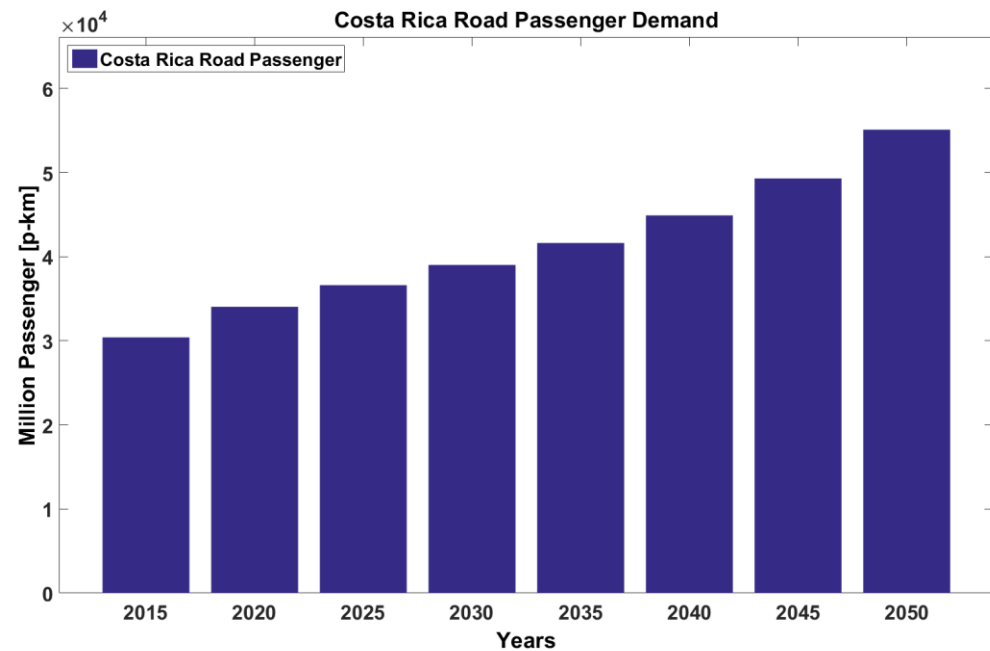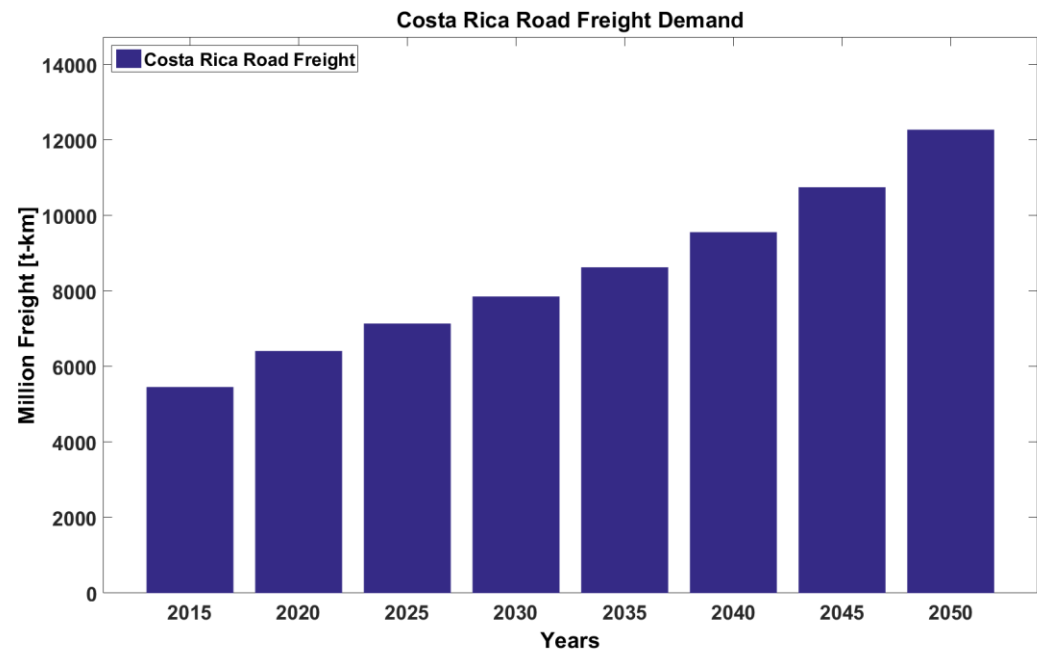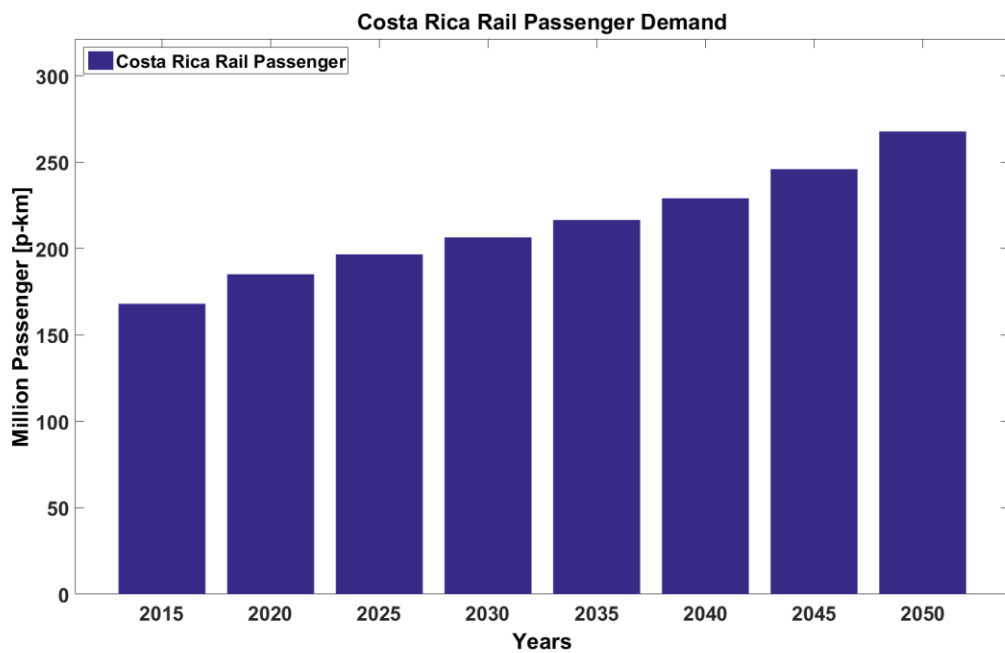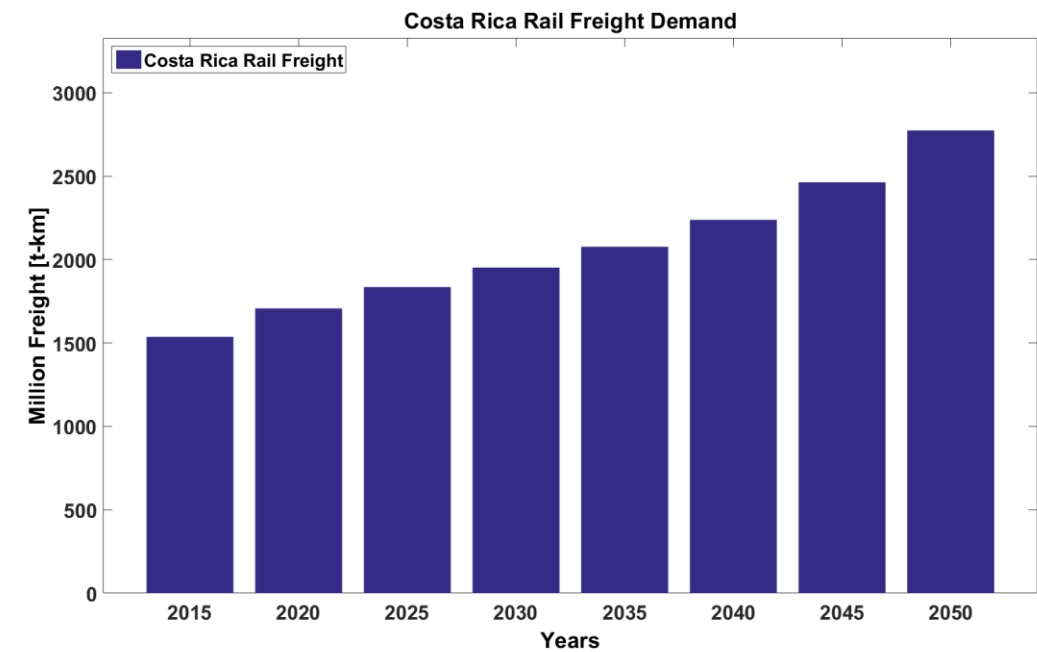

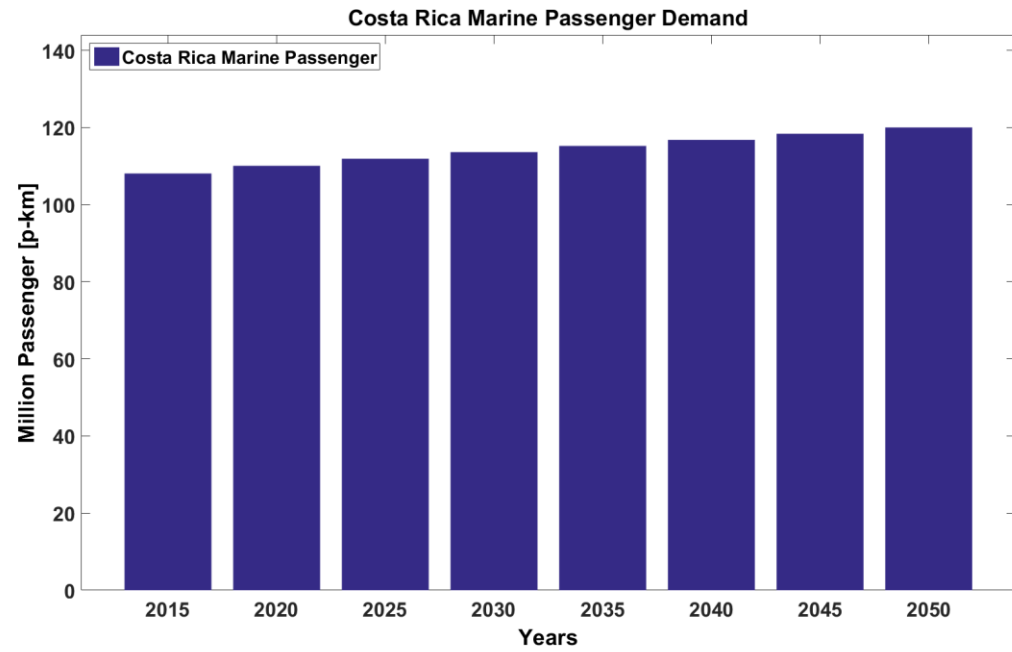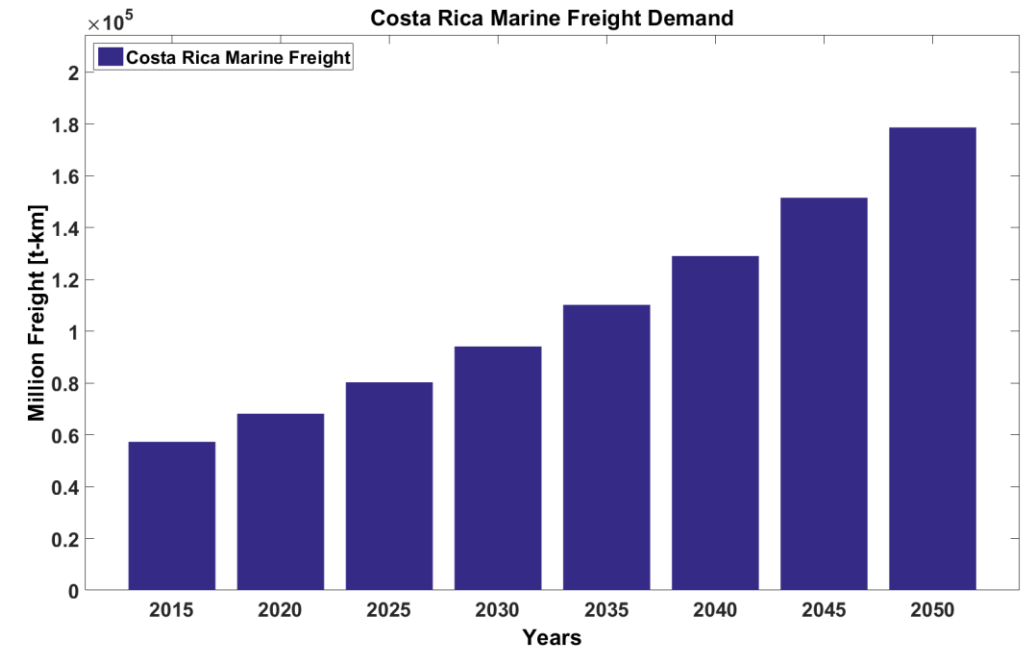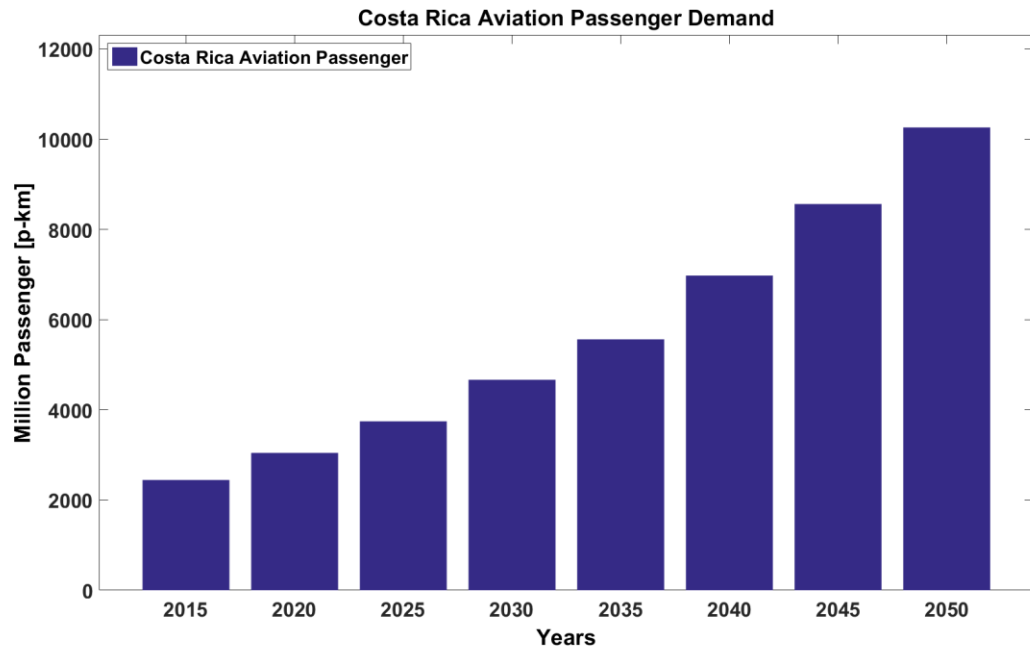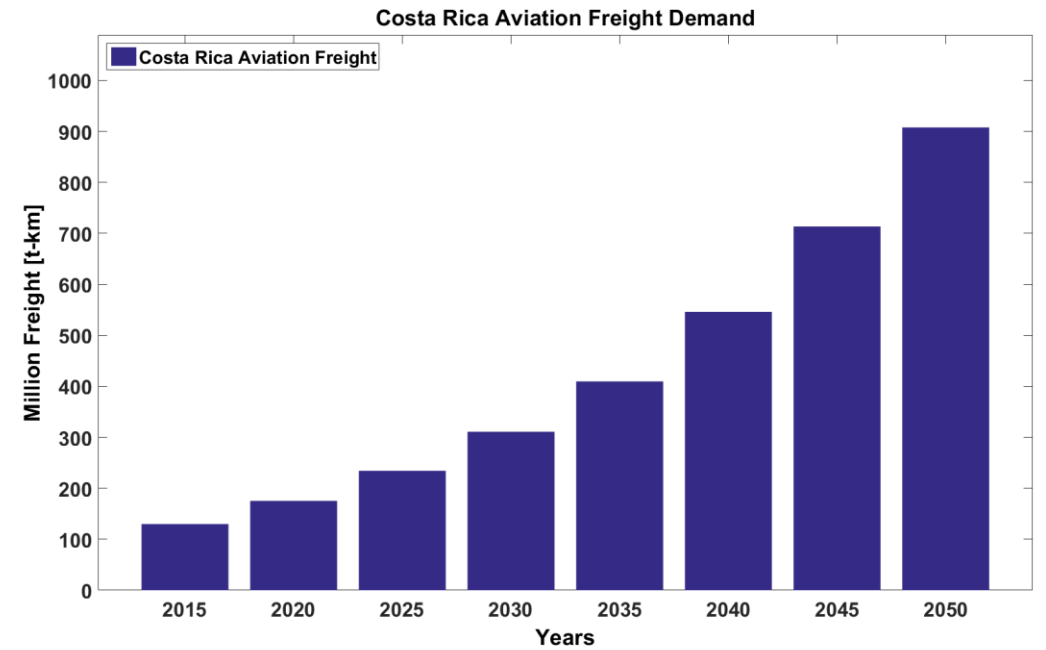

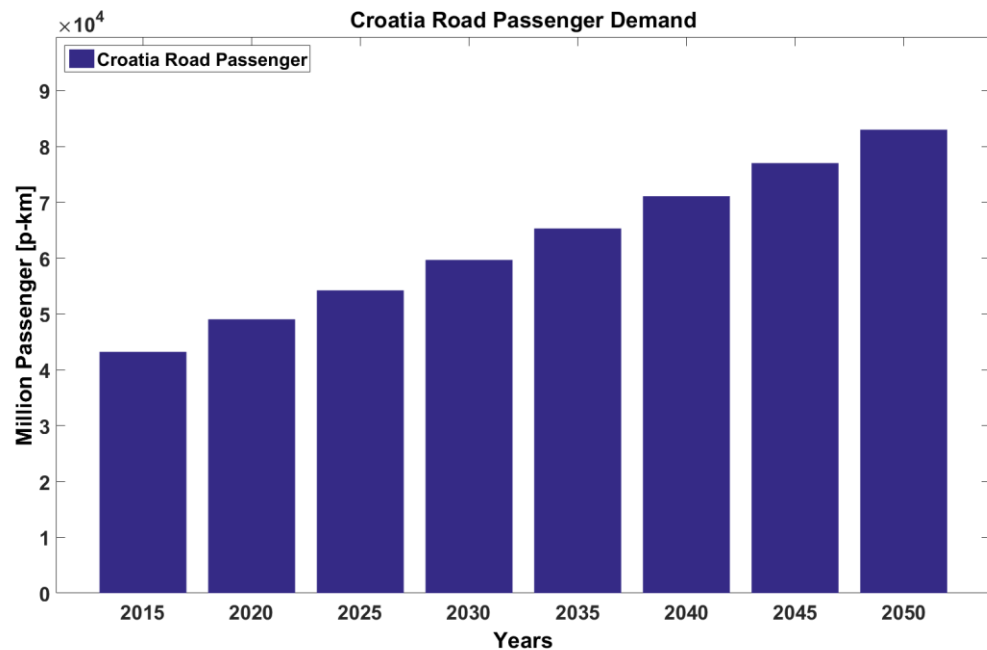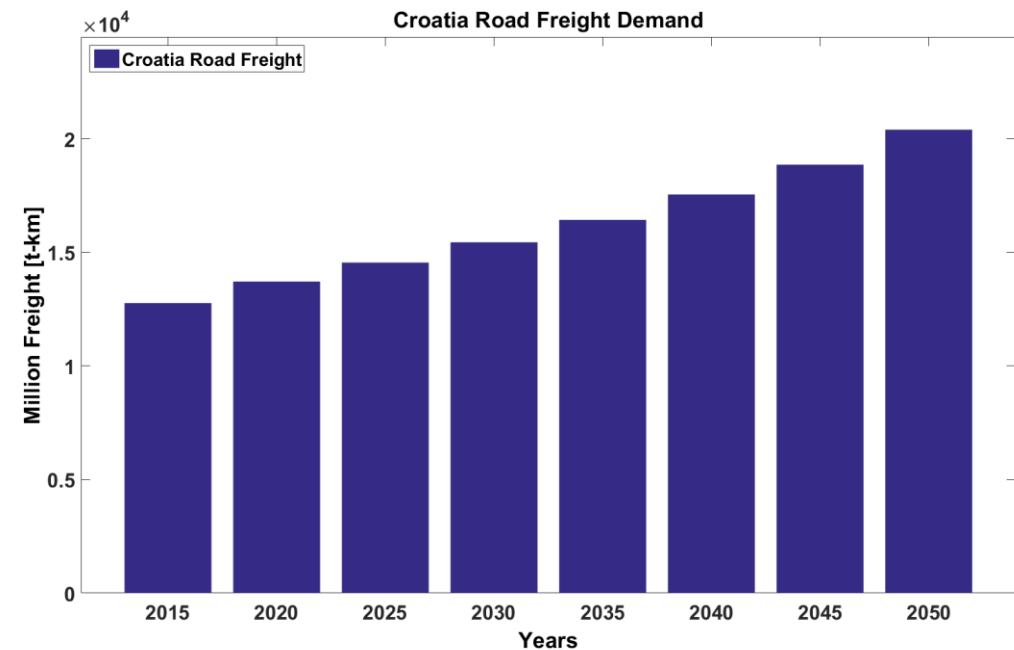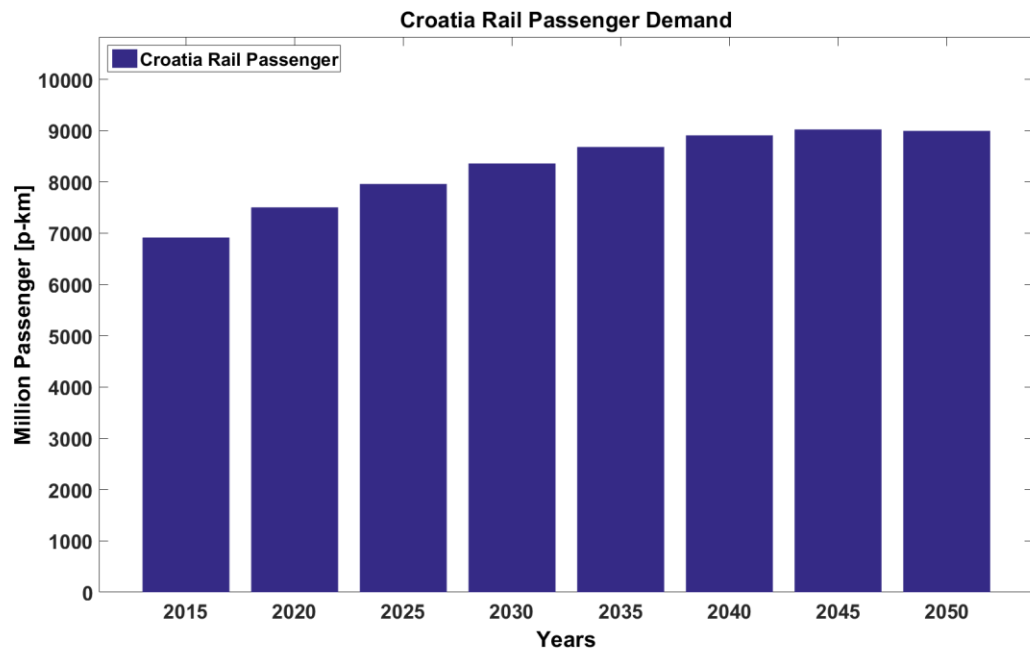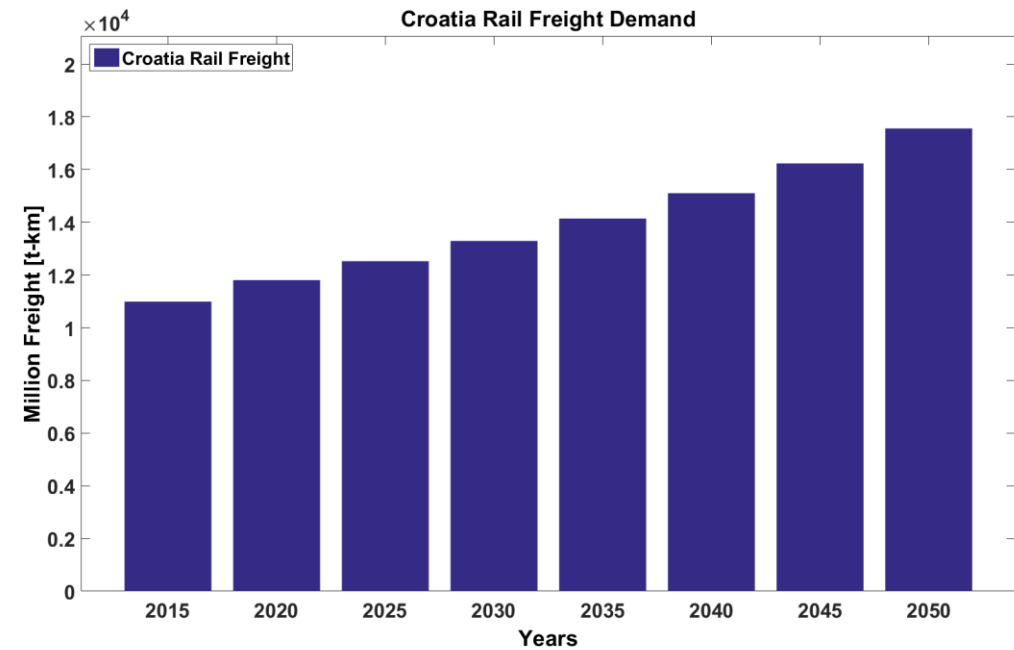

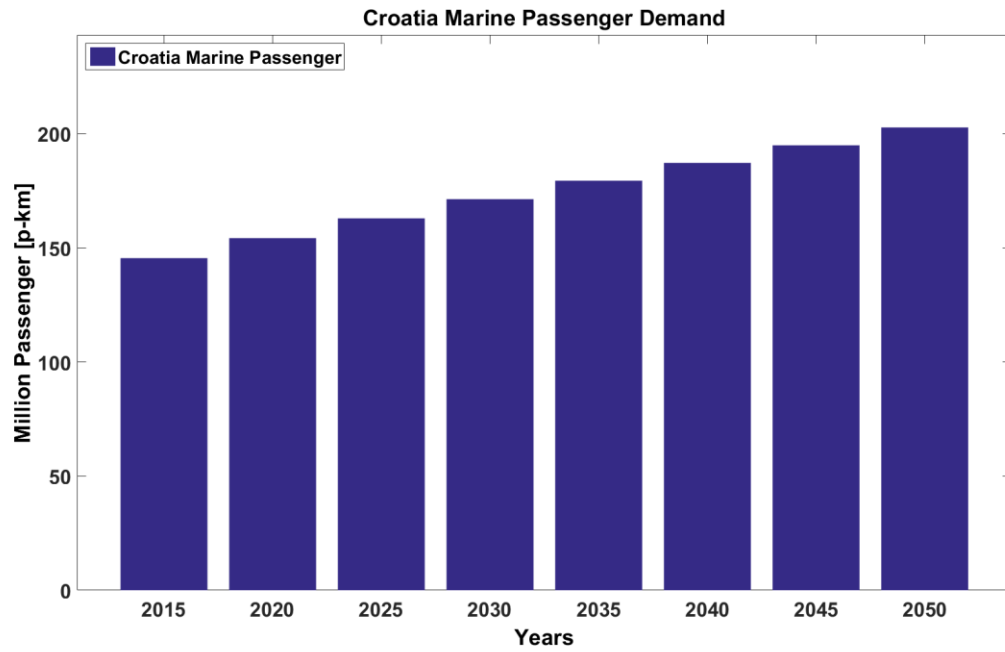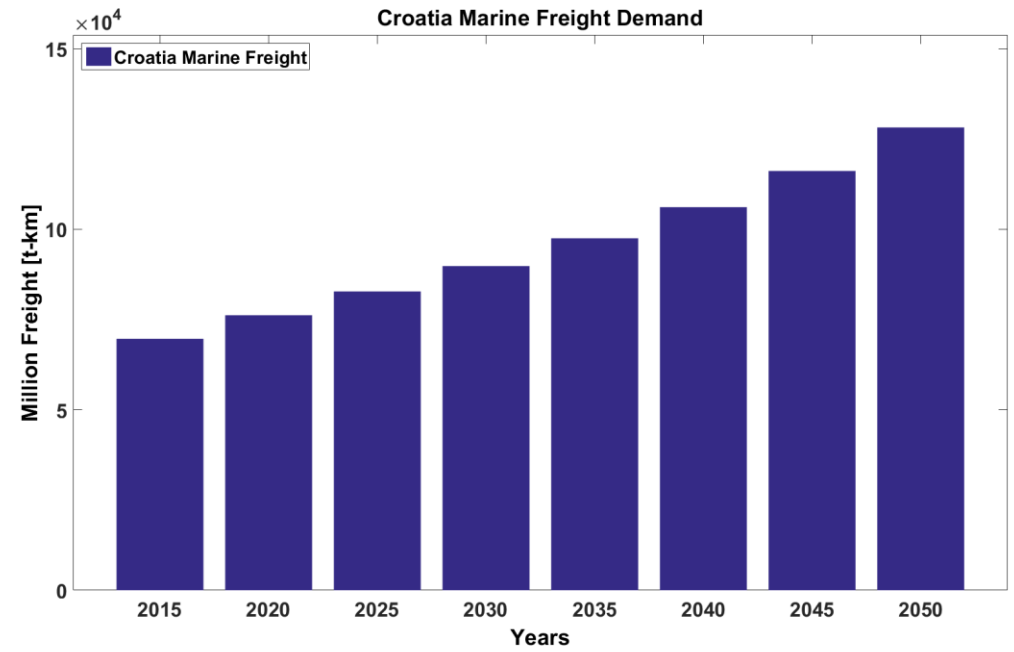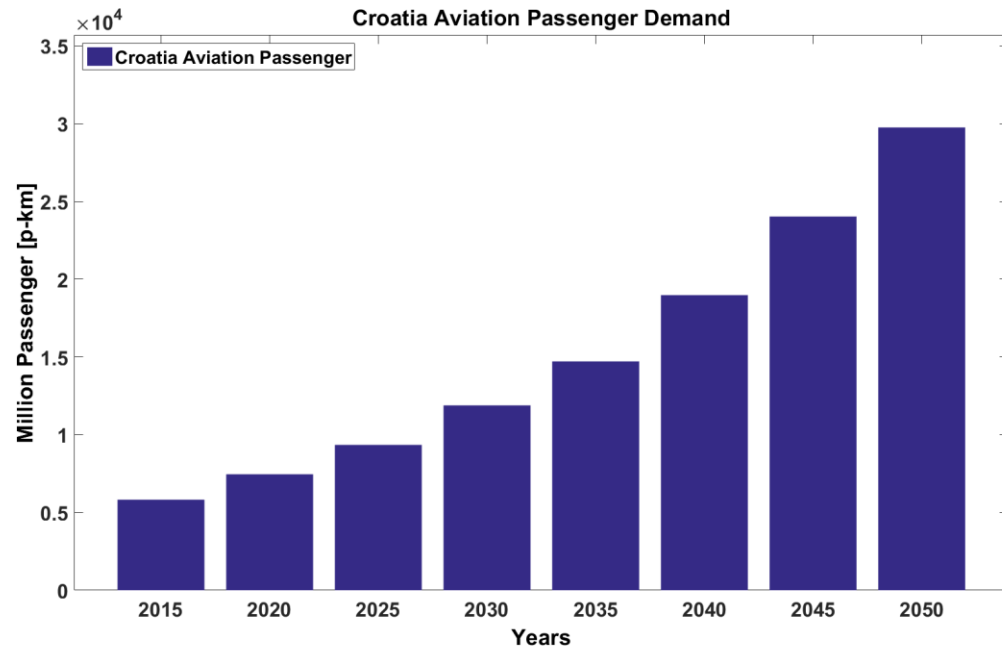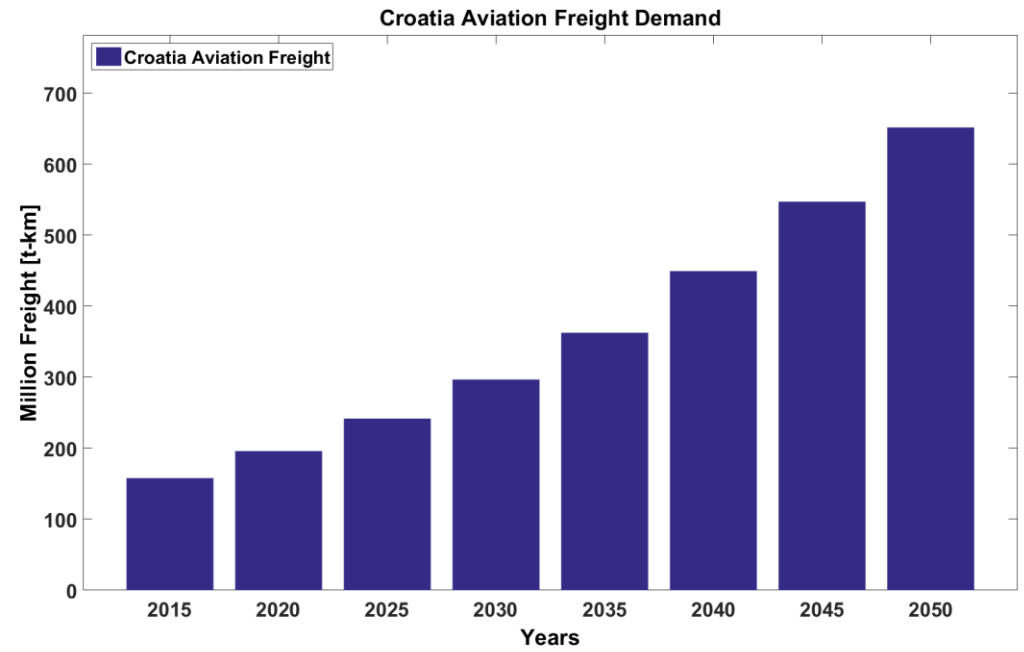

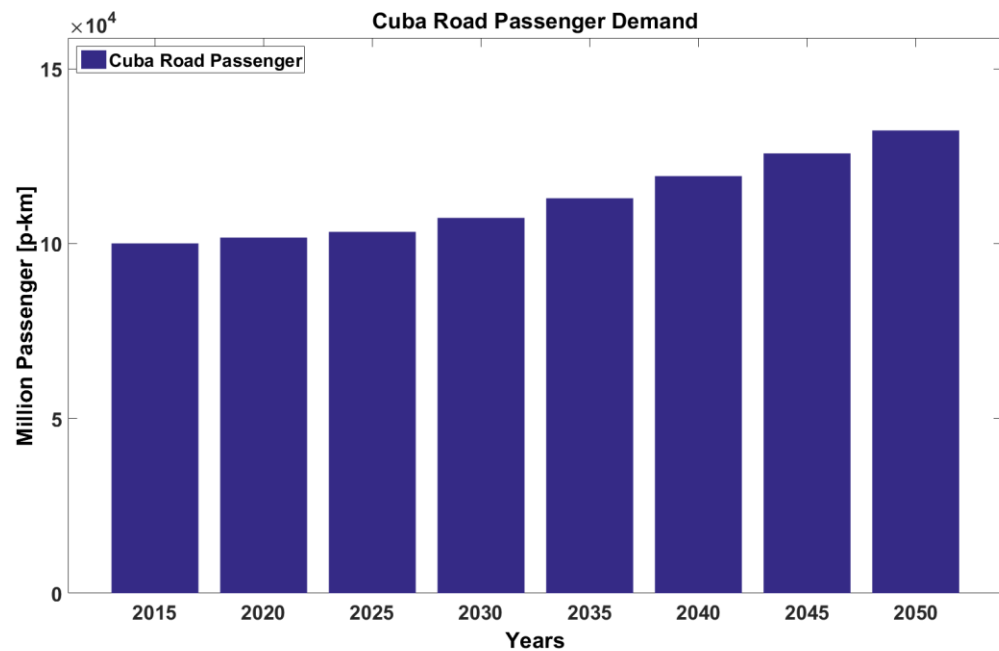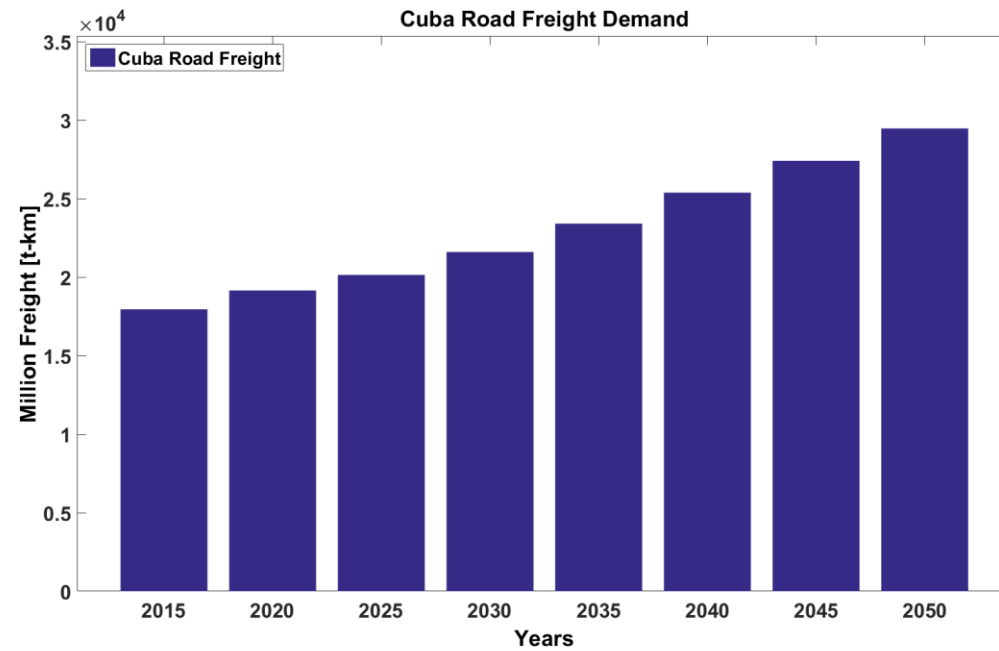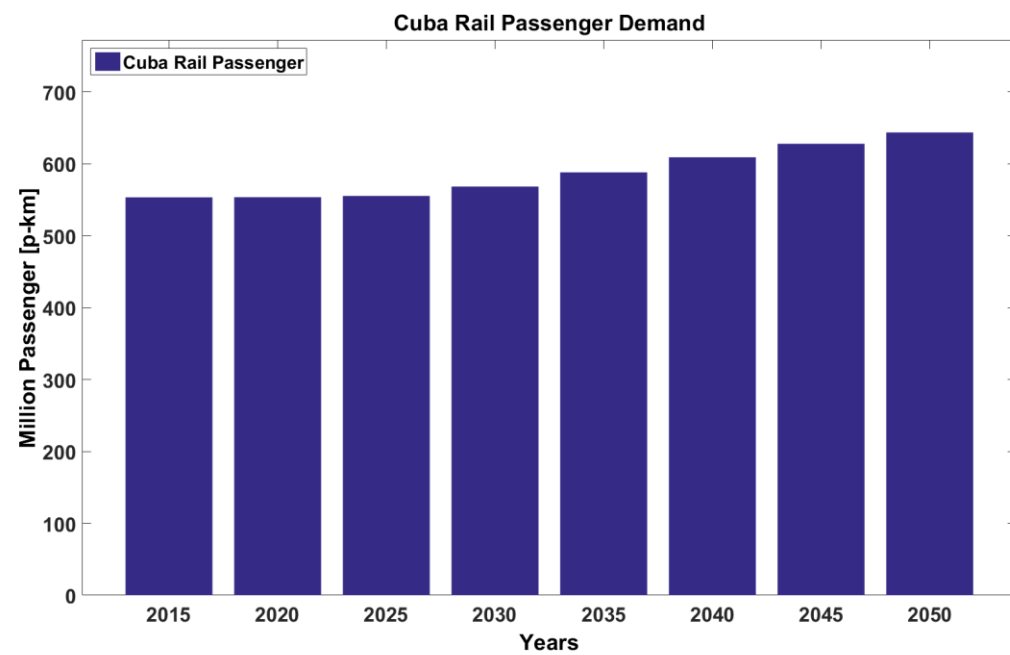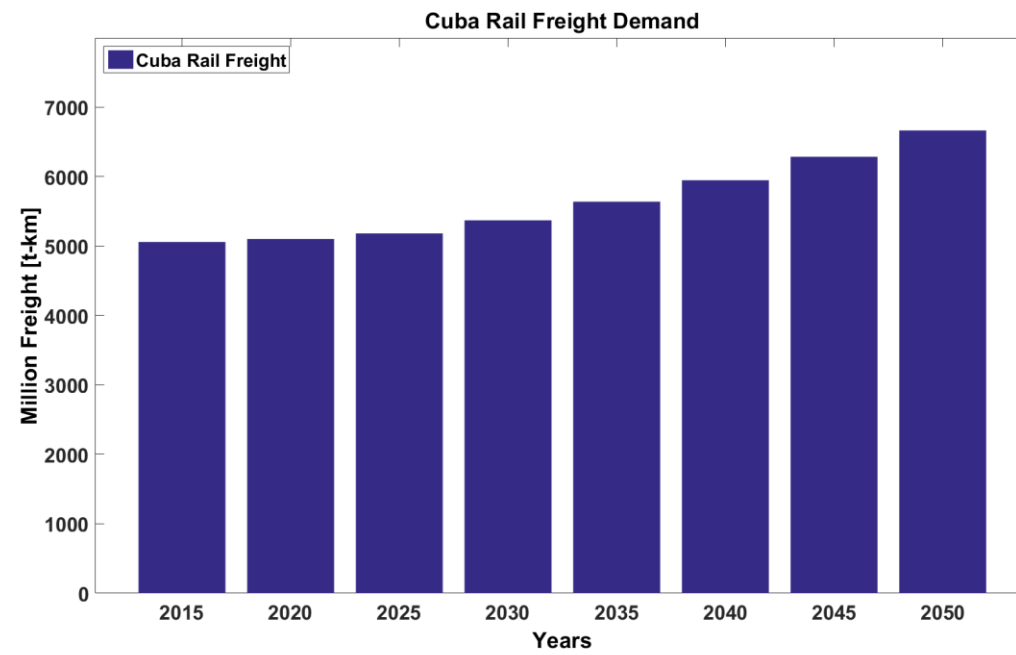

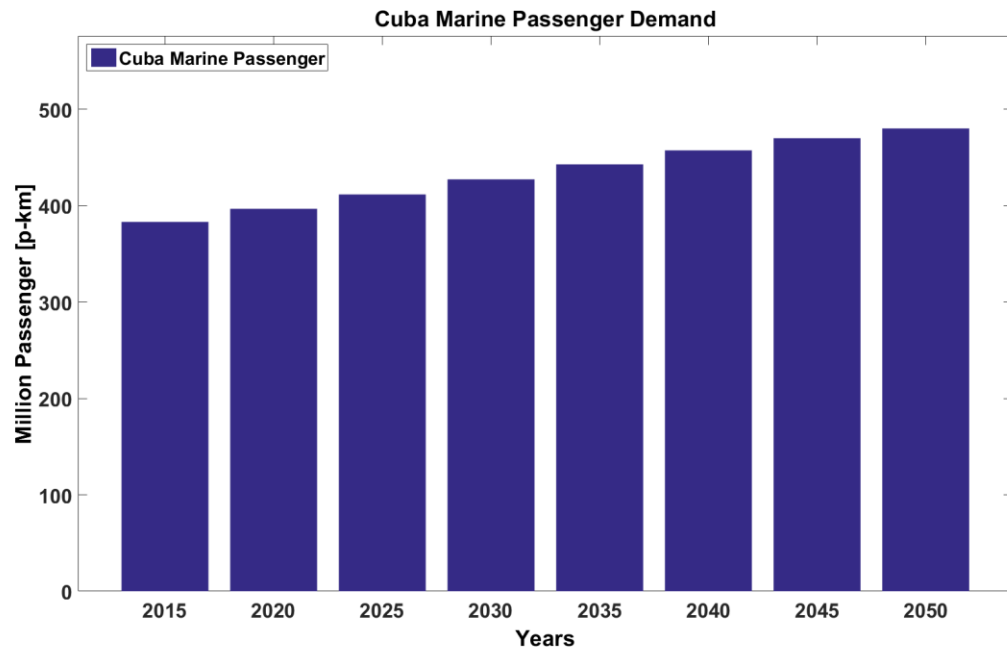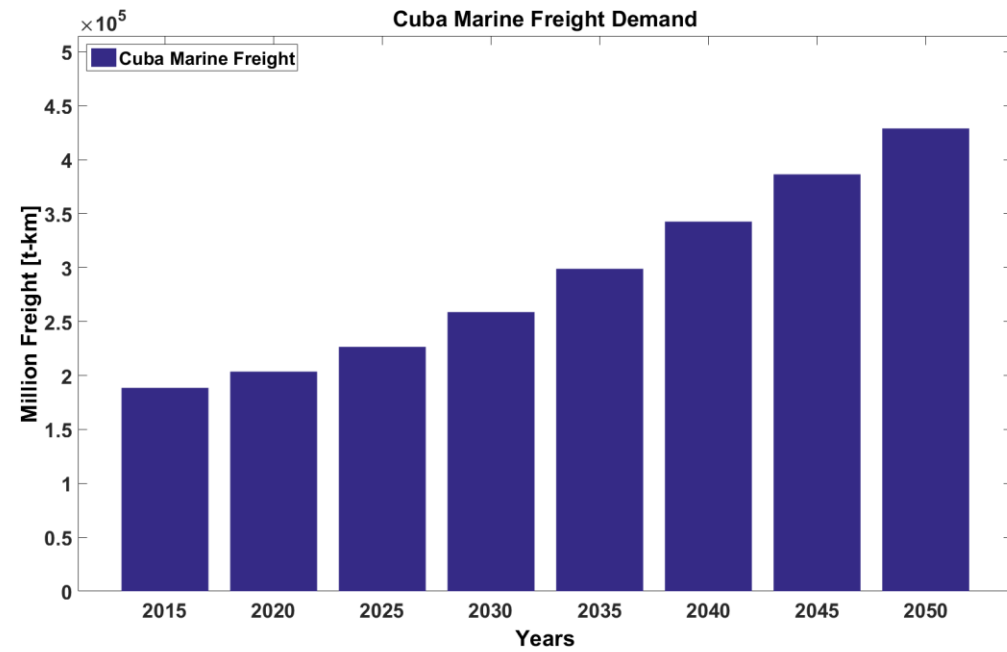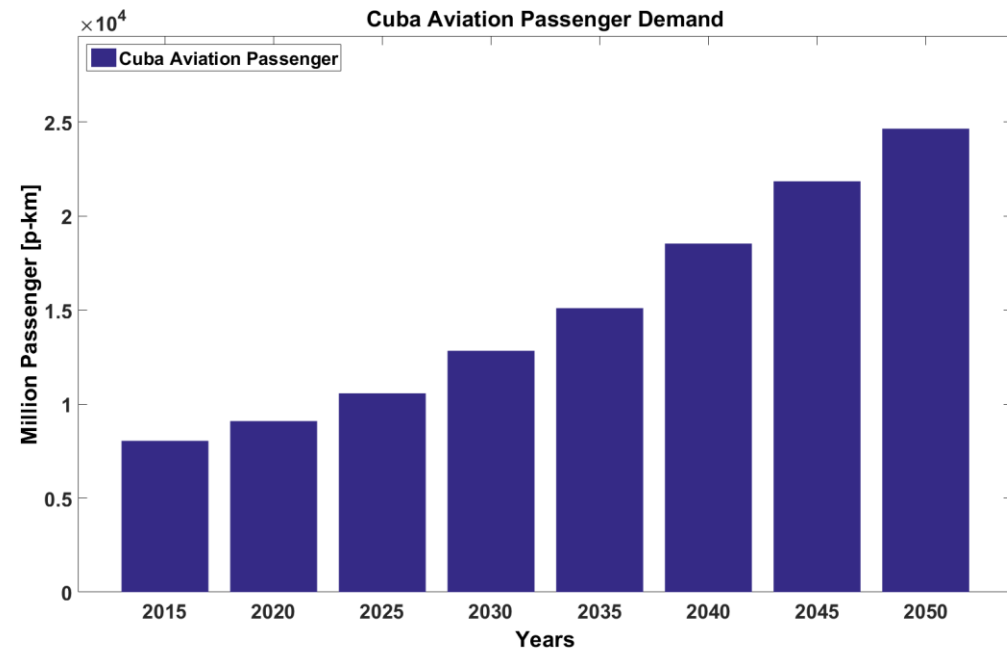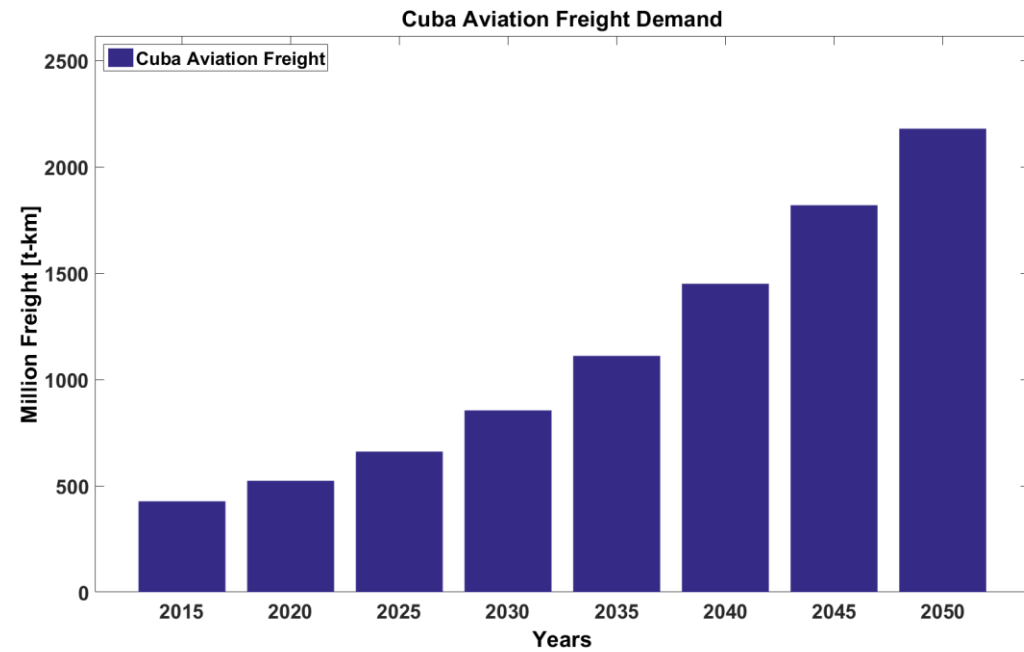

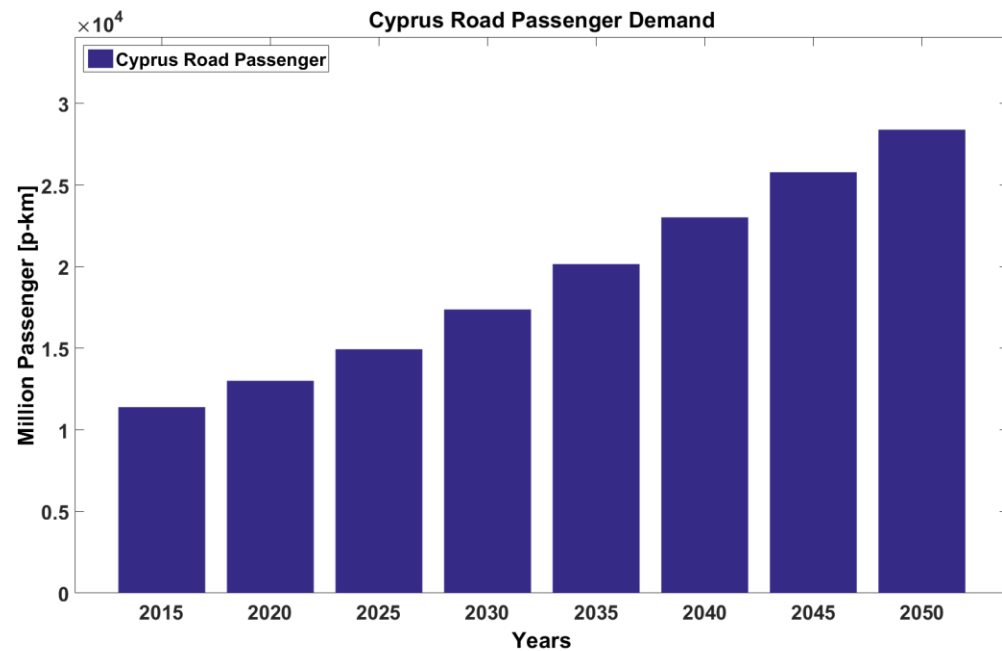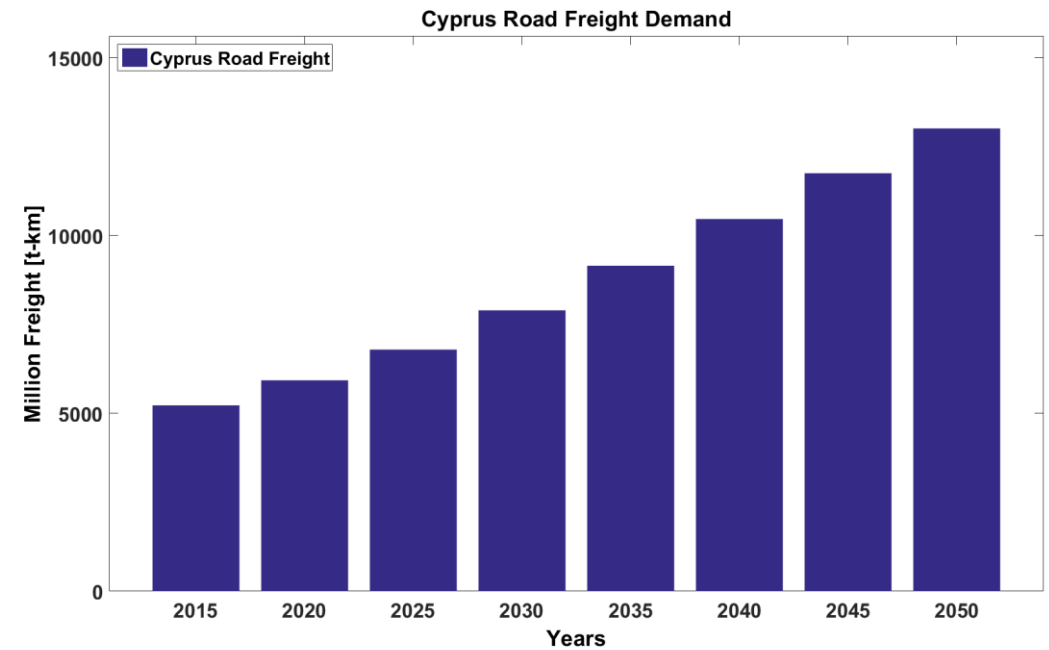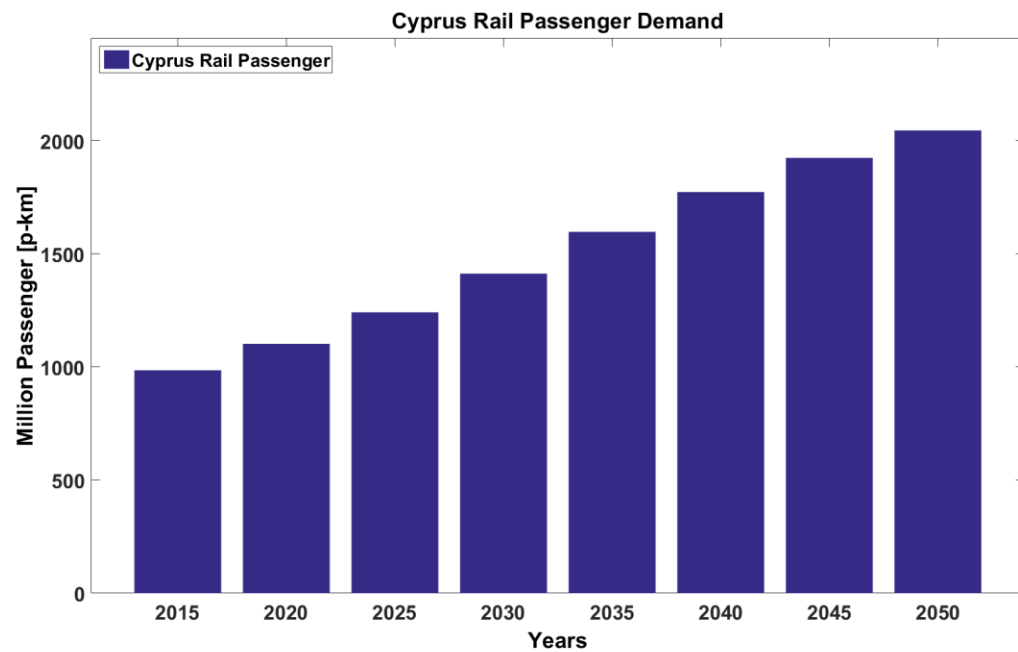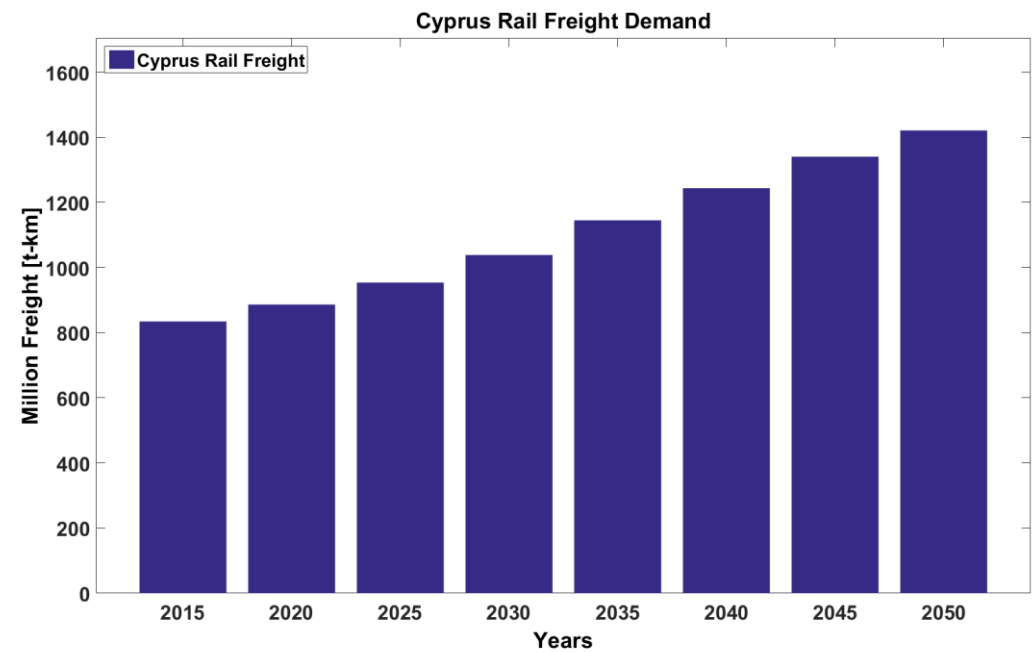

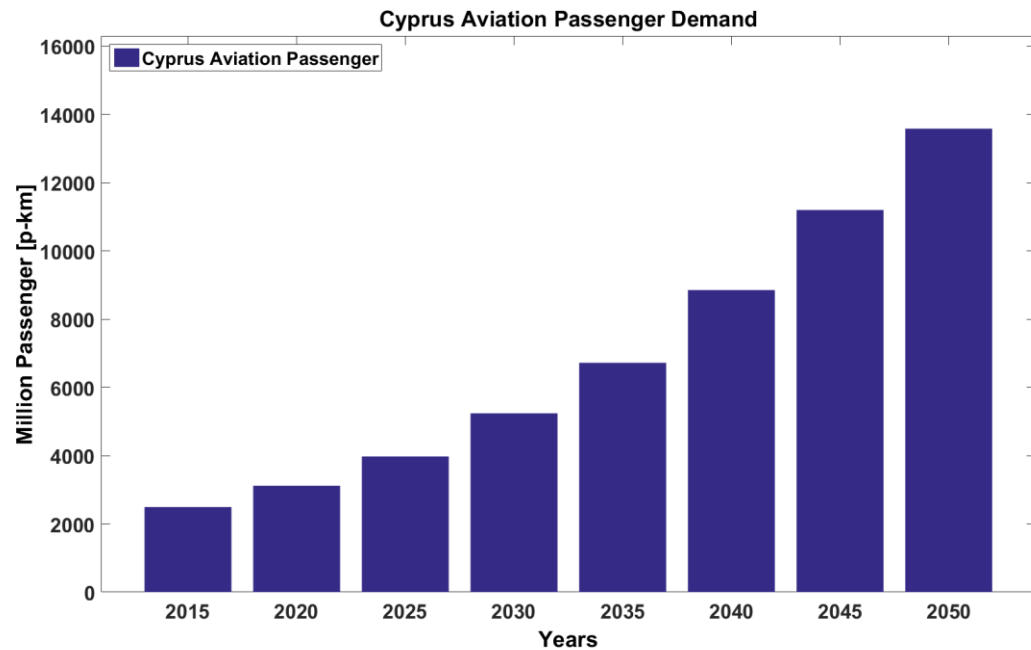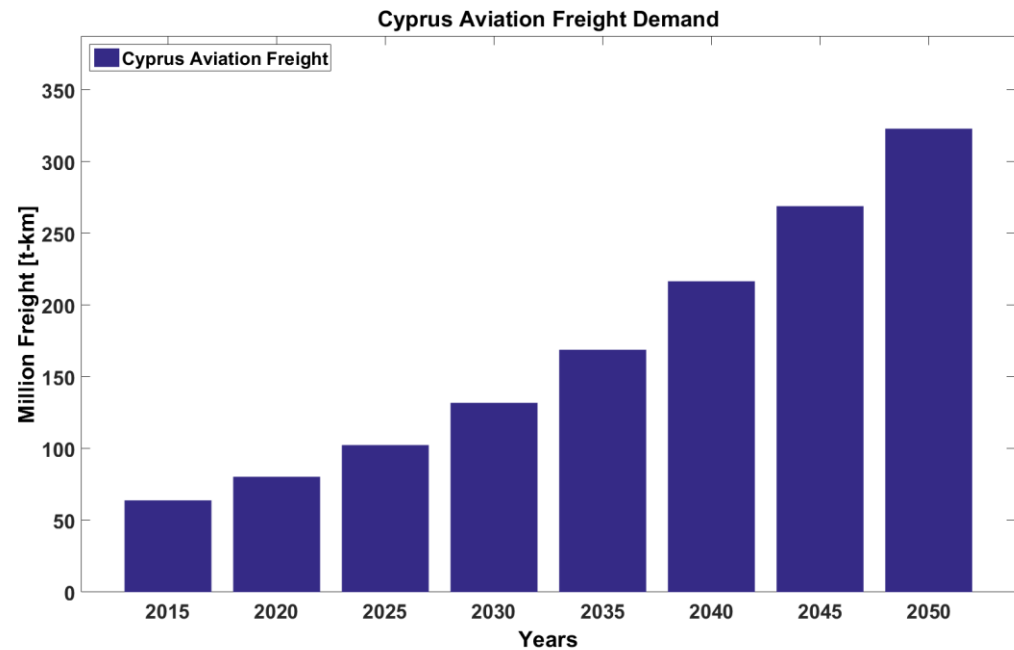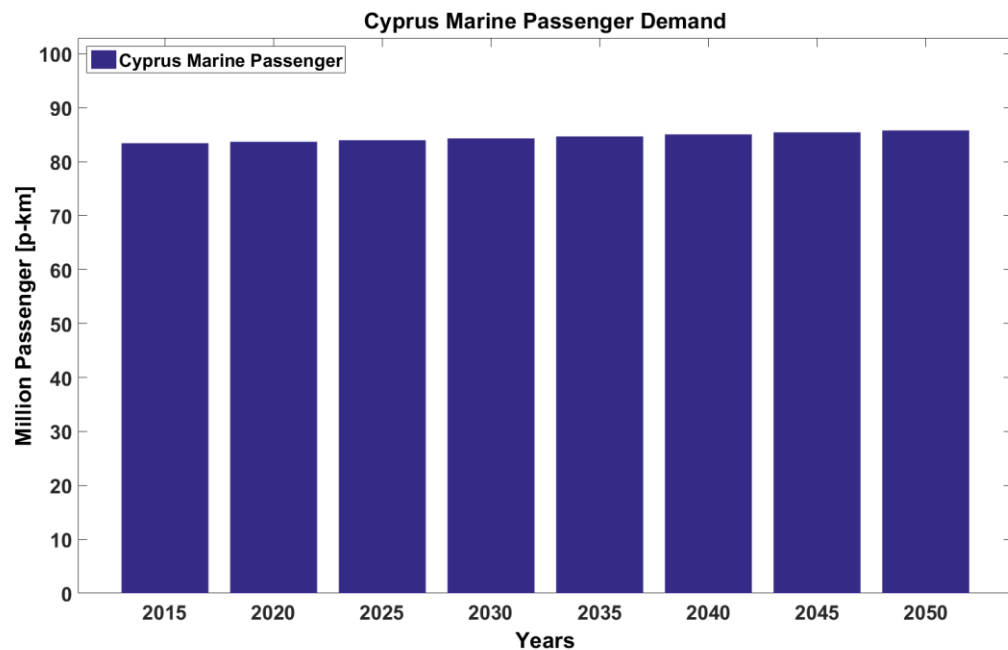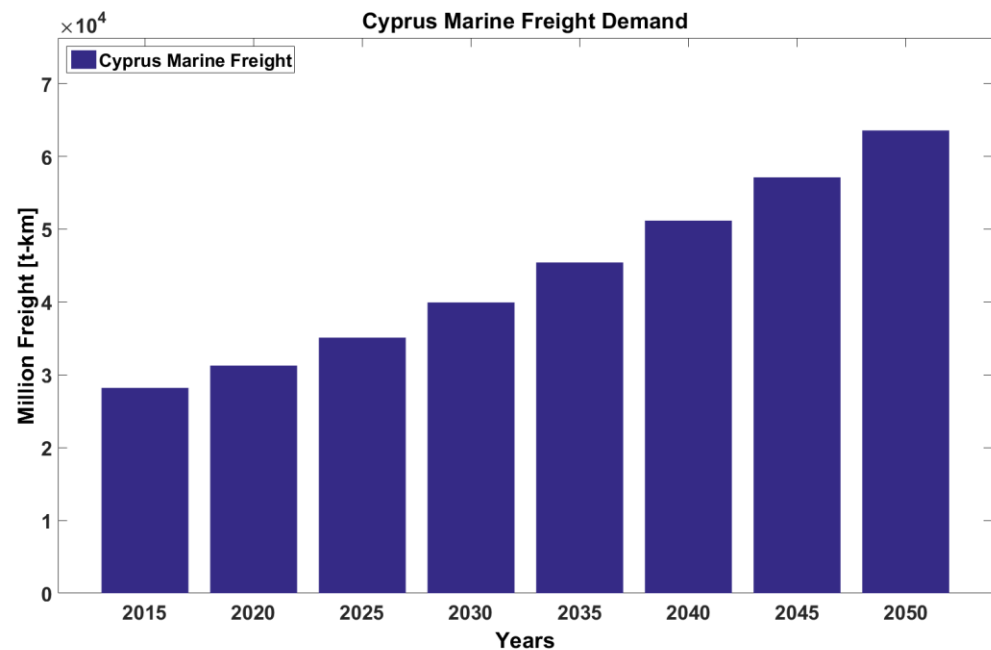

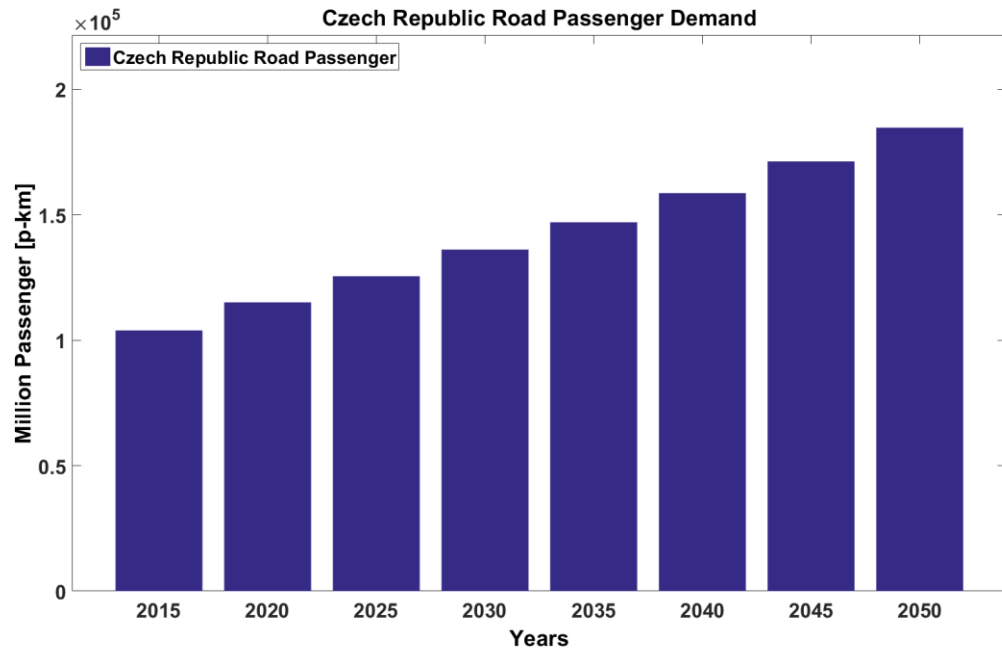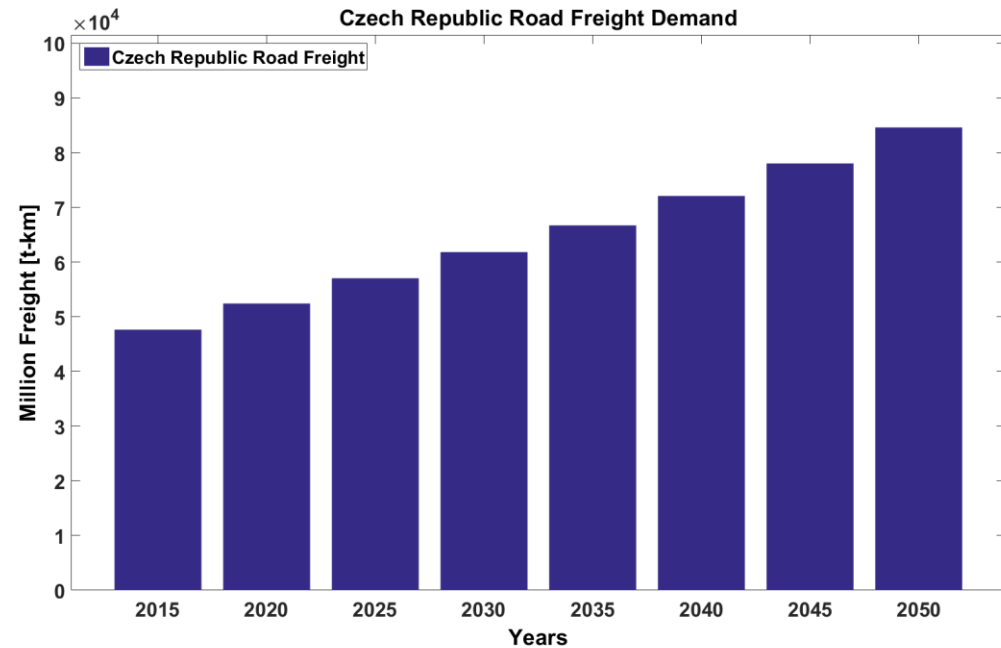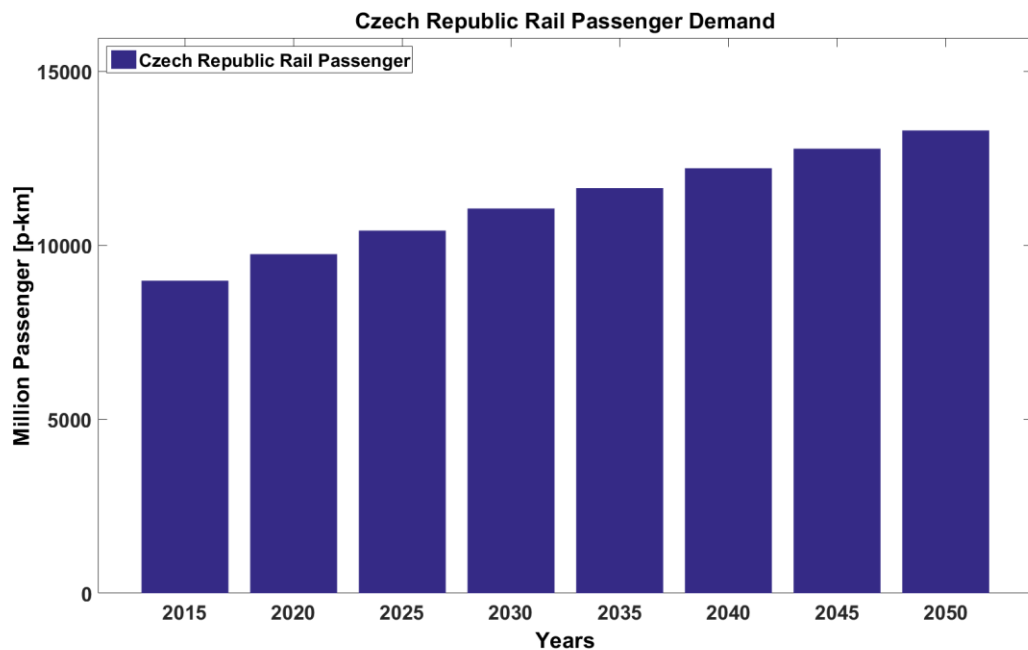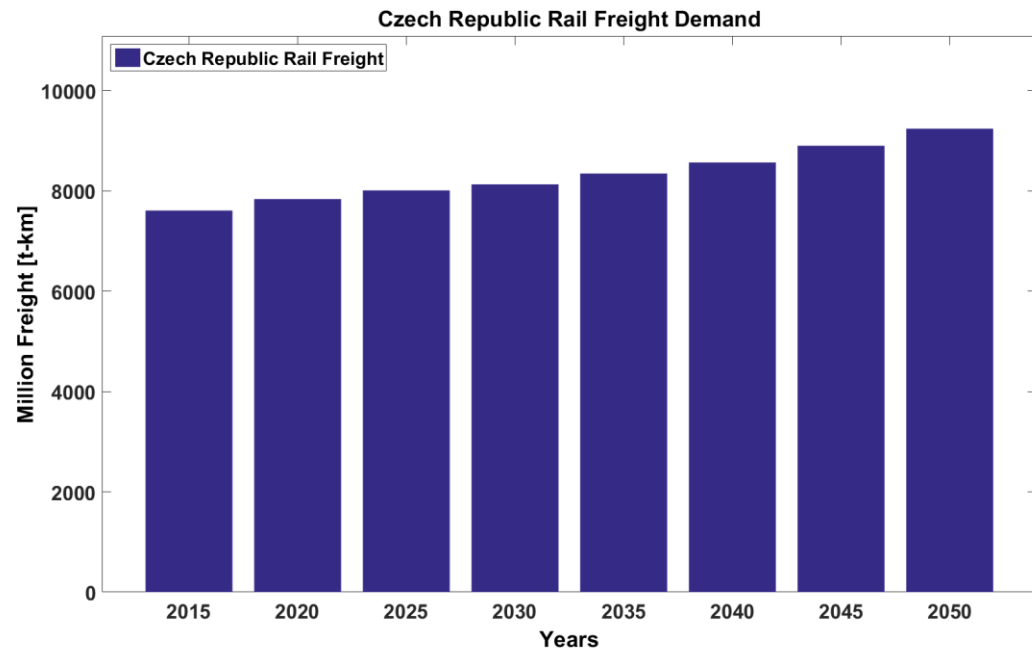

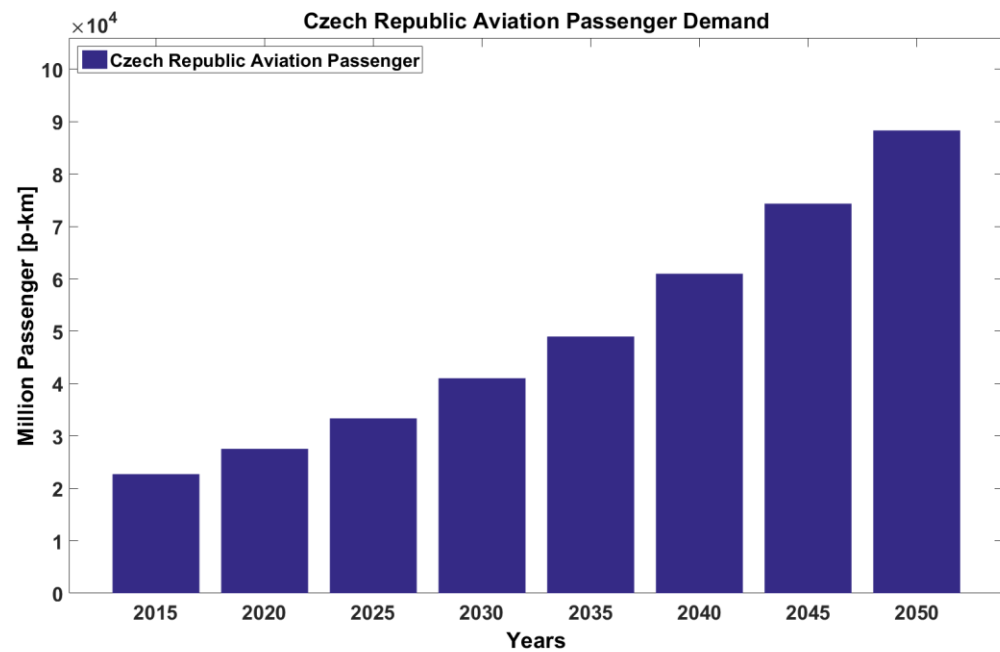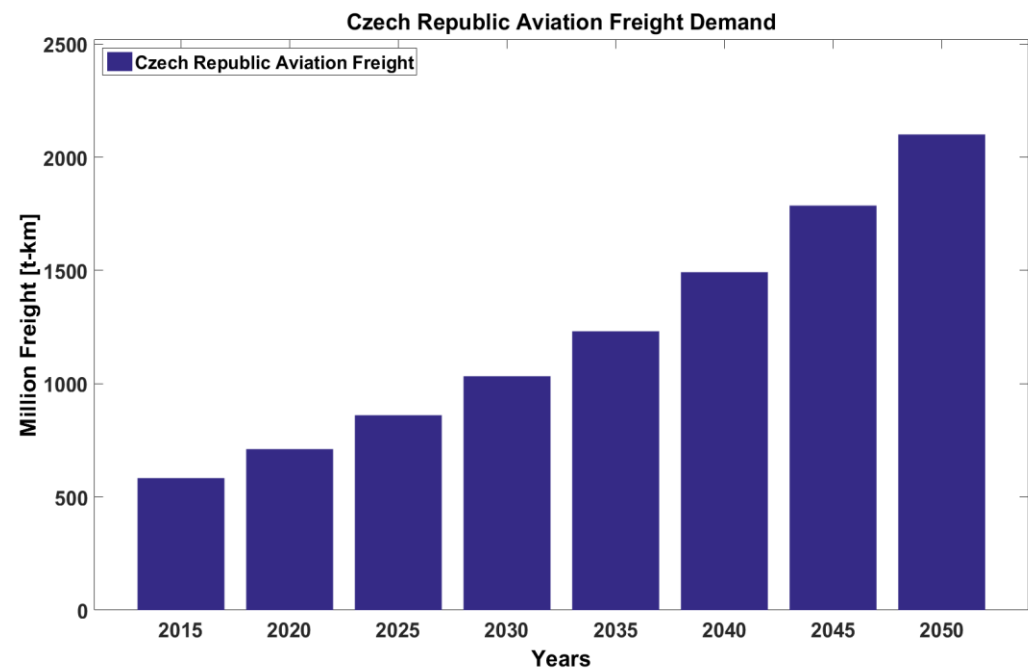

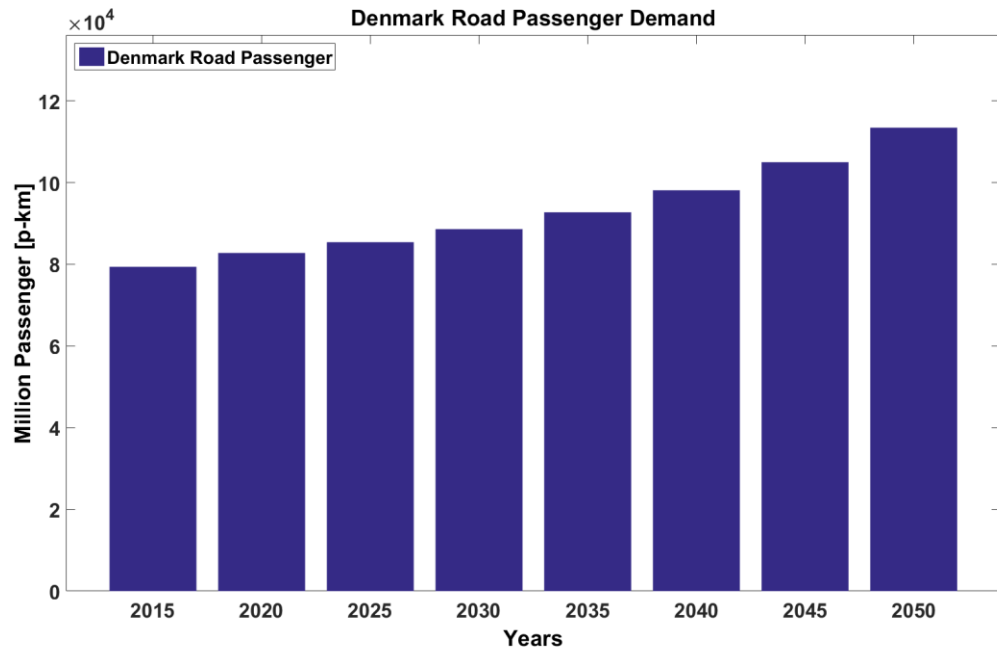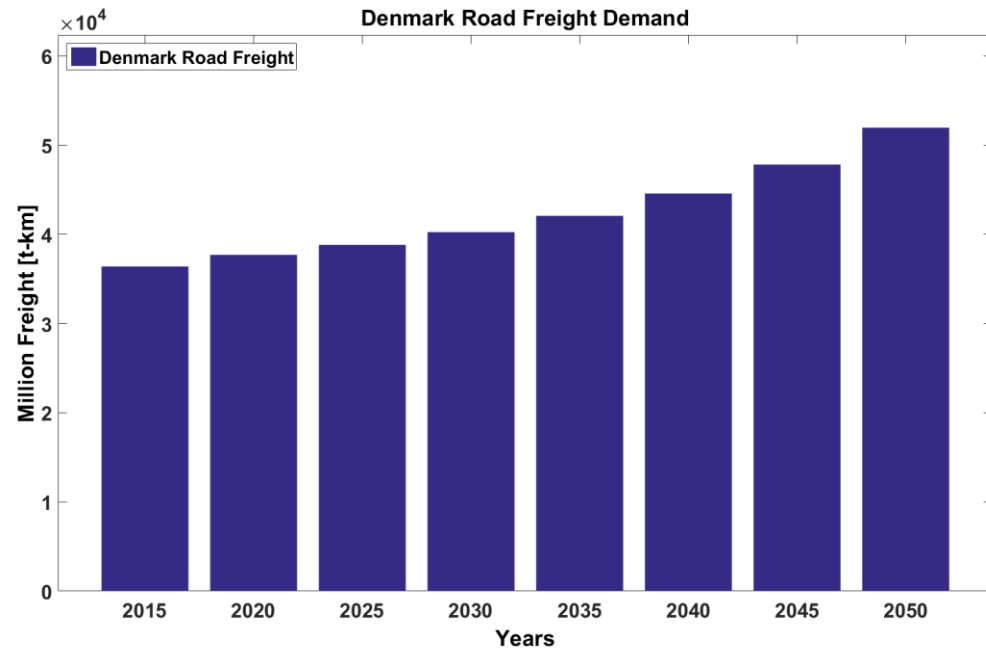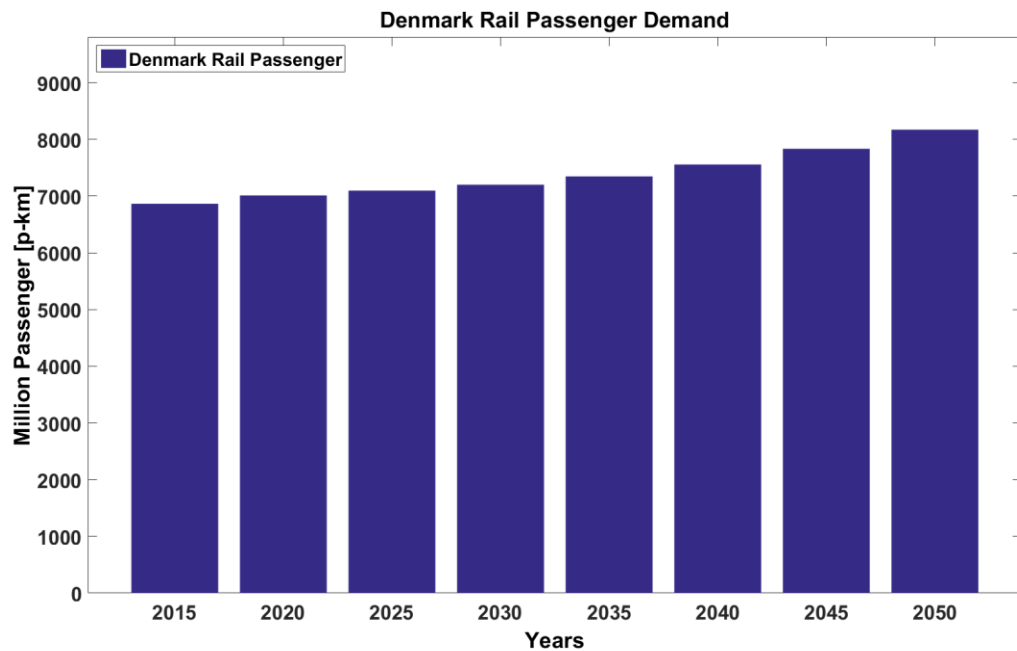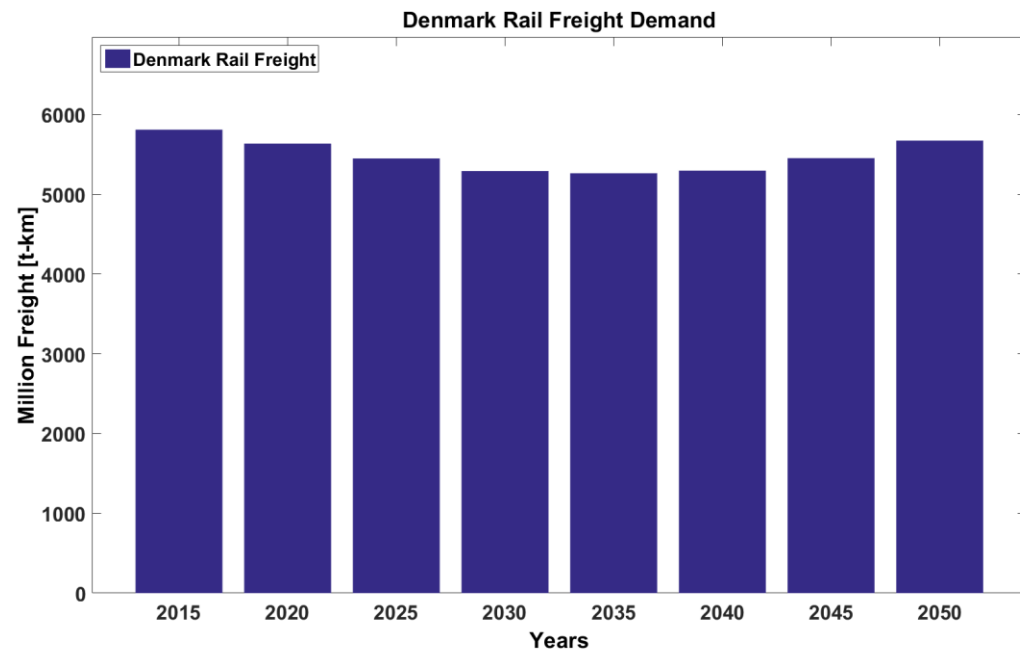

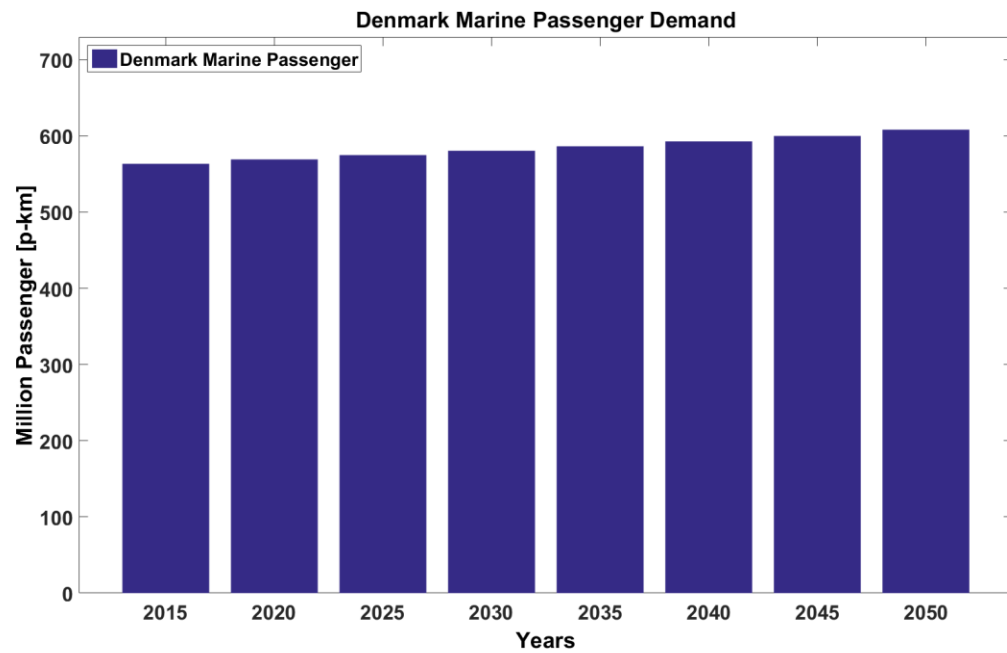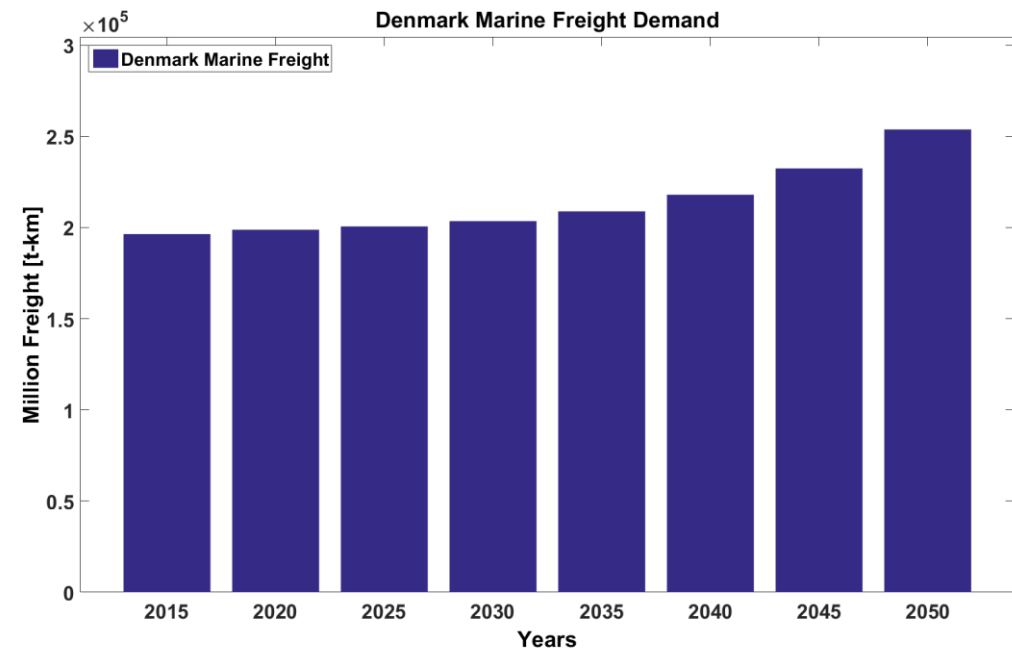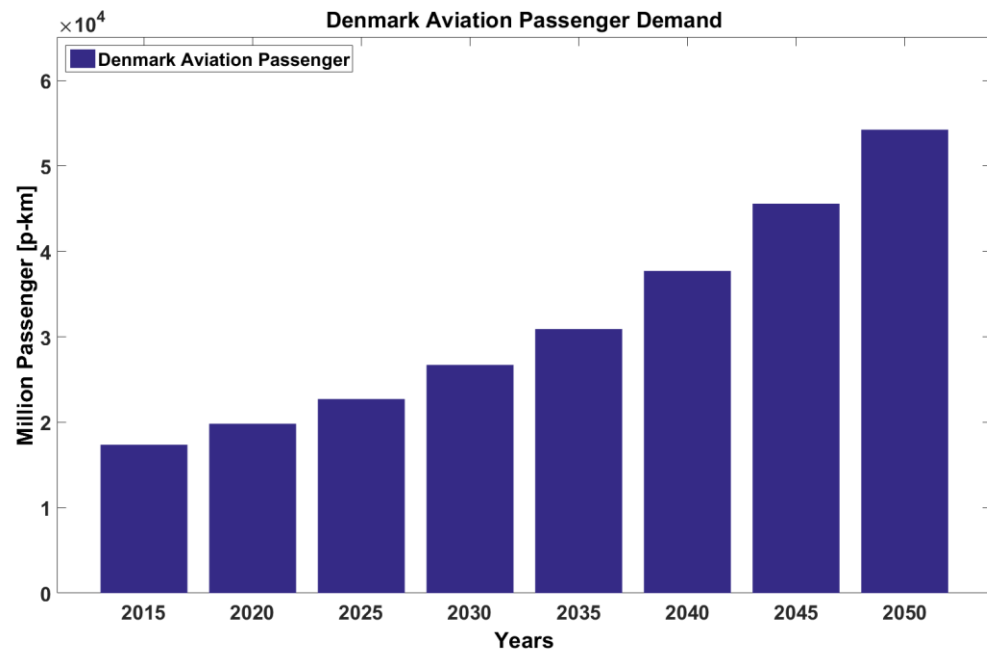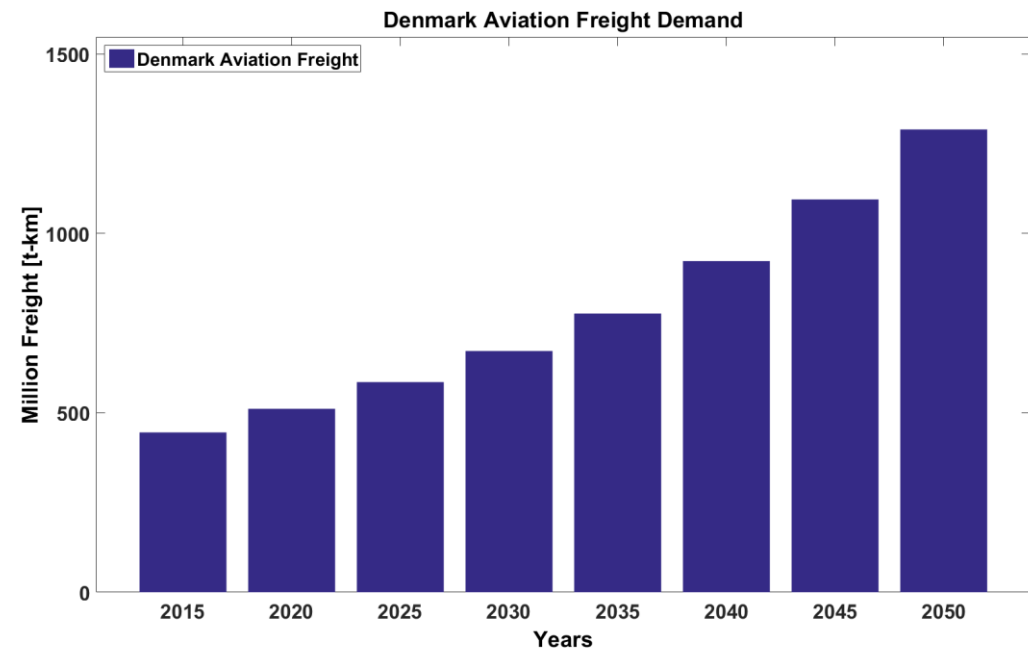

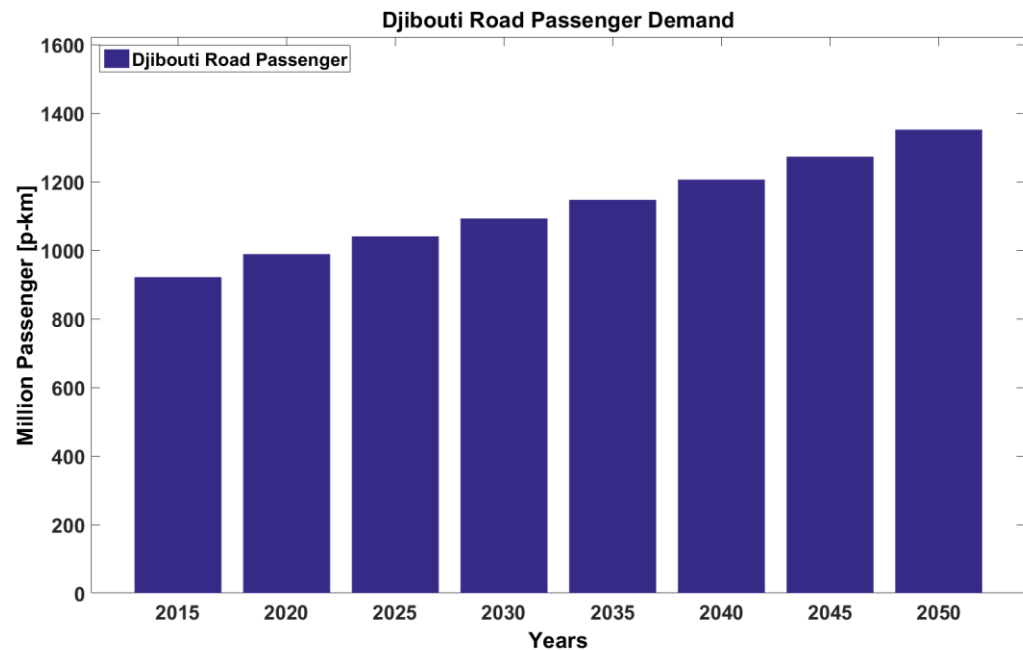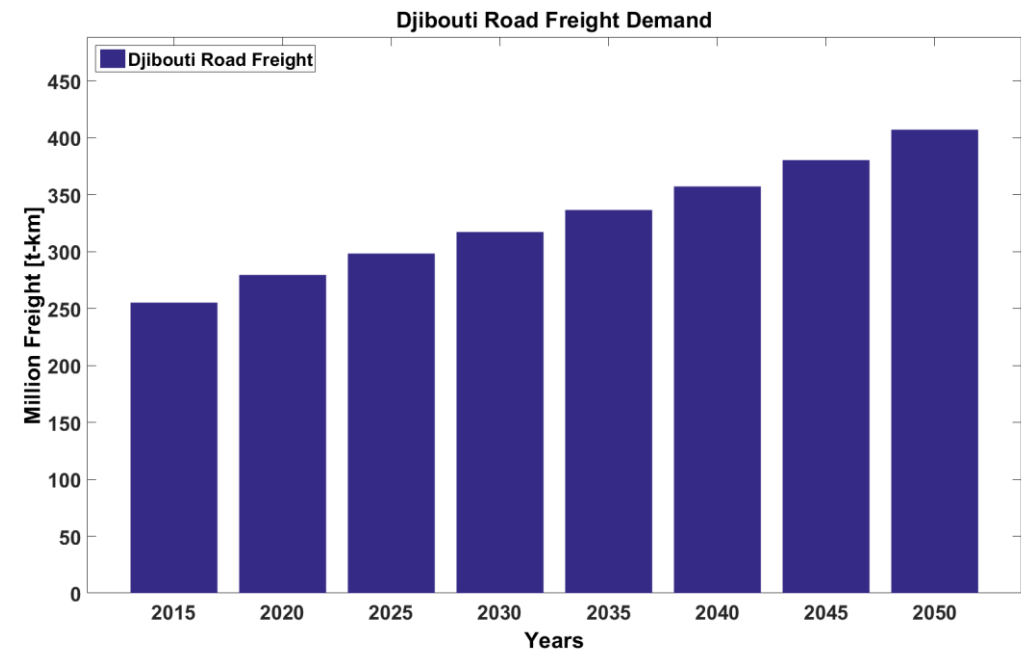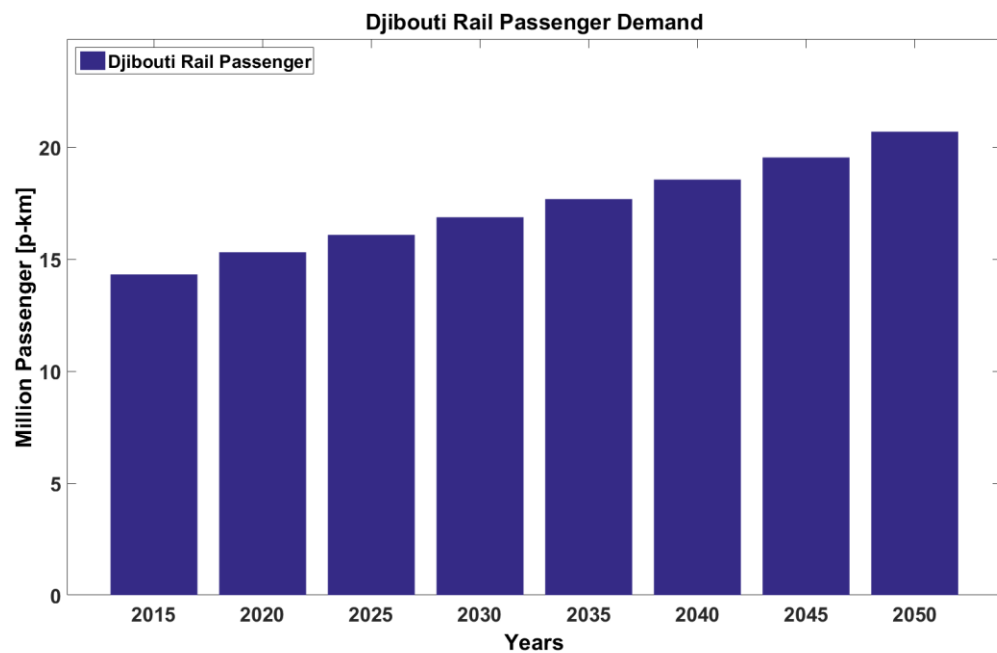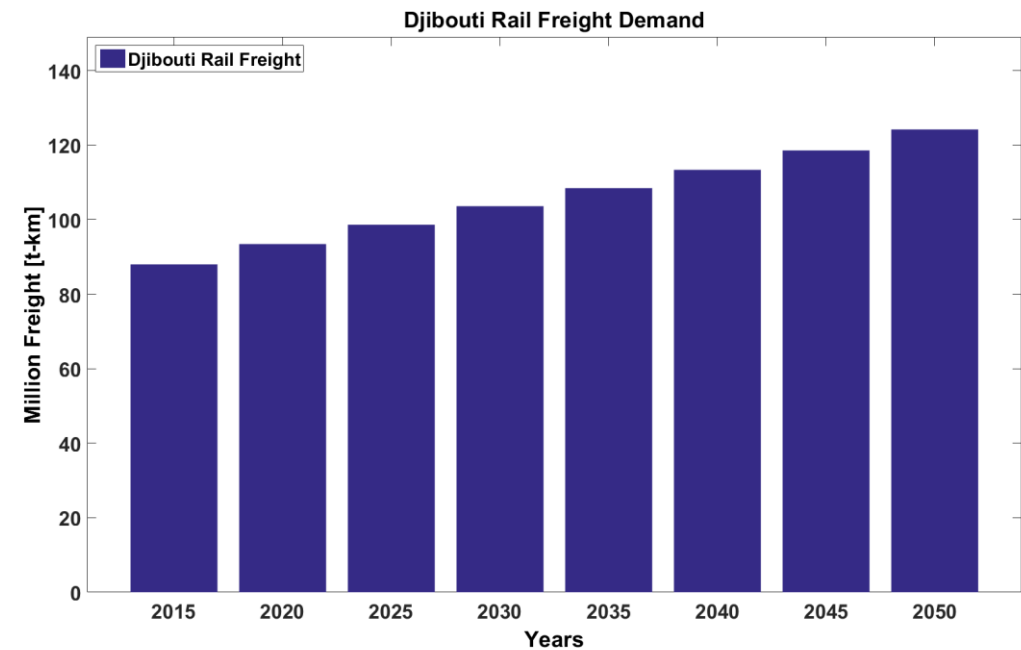

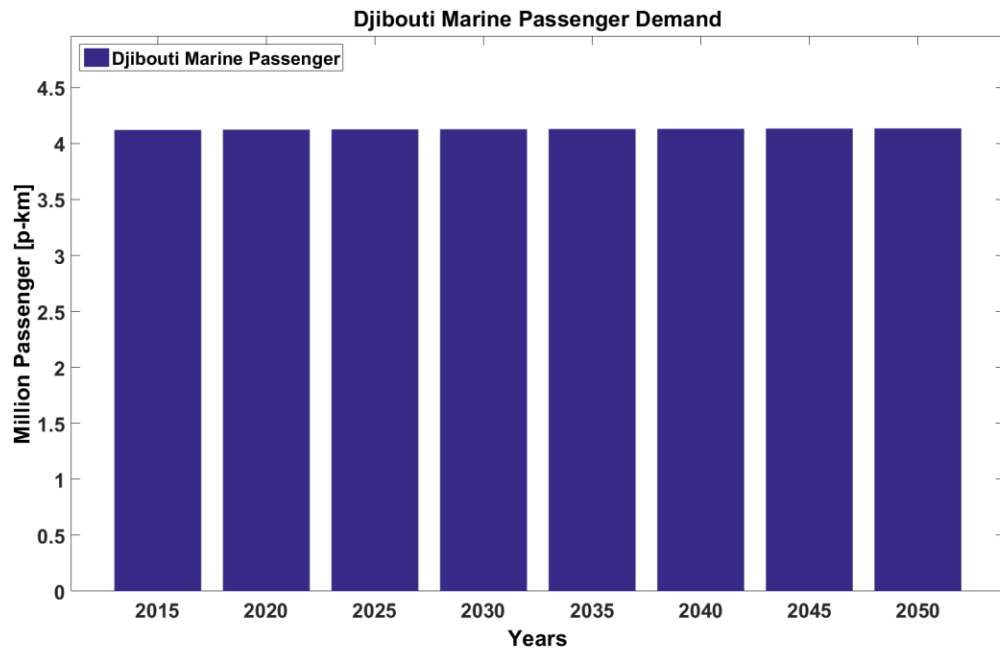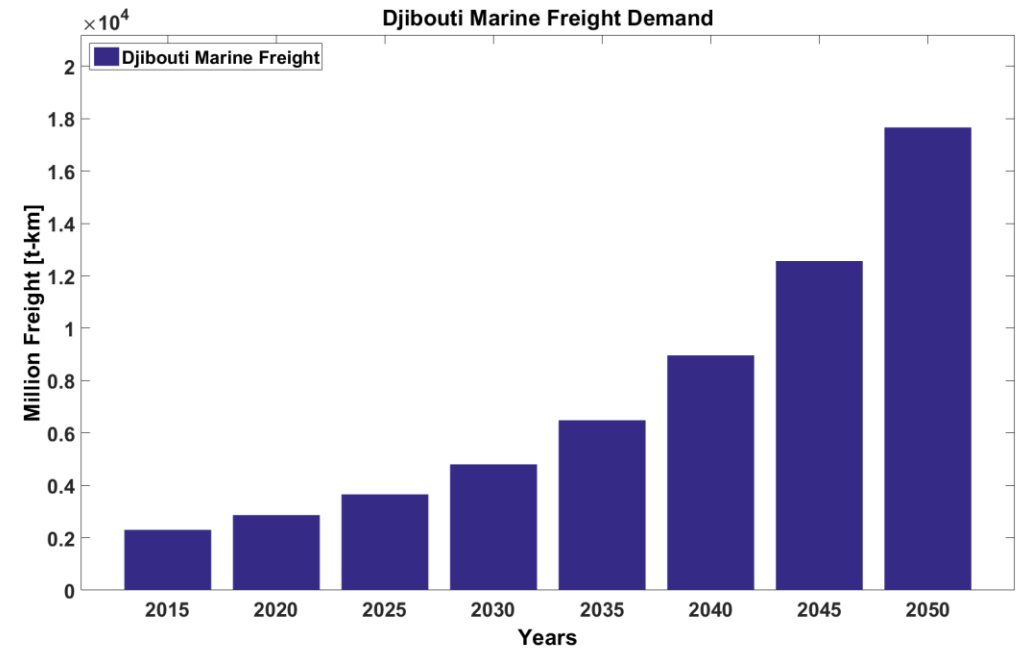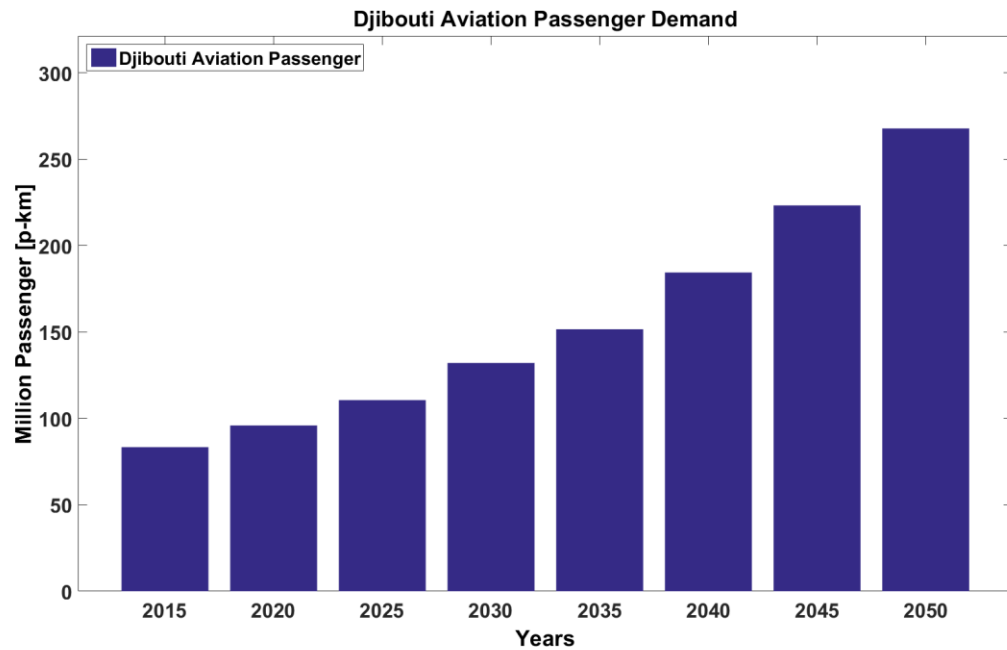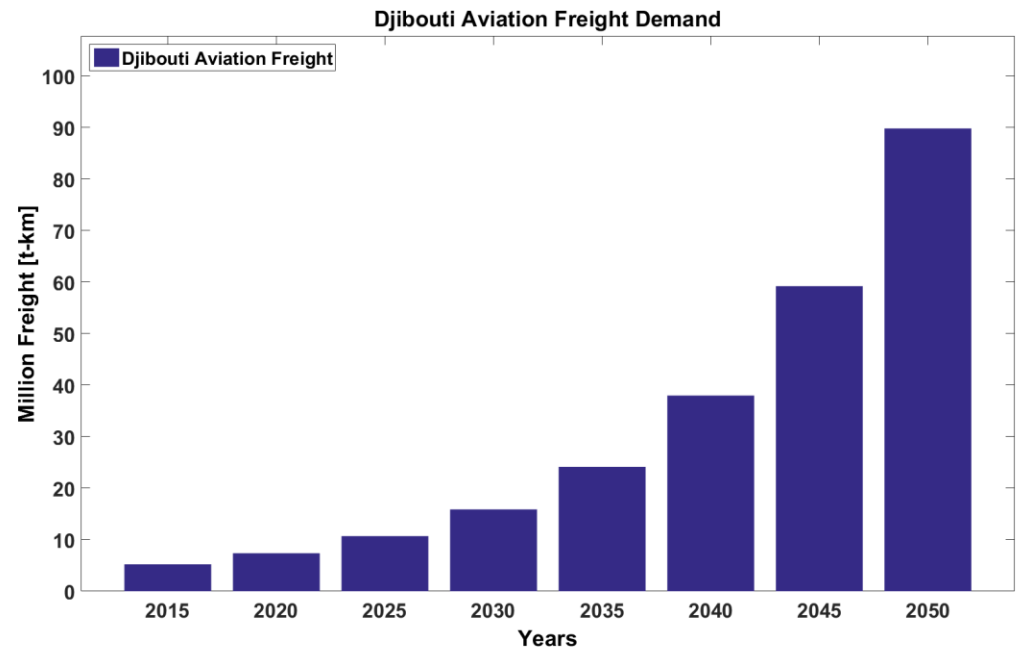

Dominica Road Passenger Demand

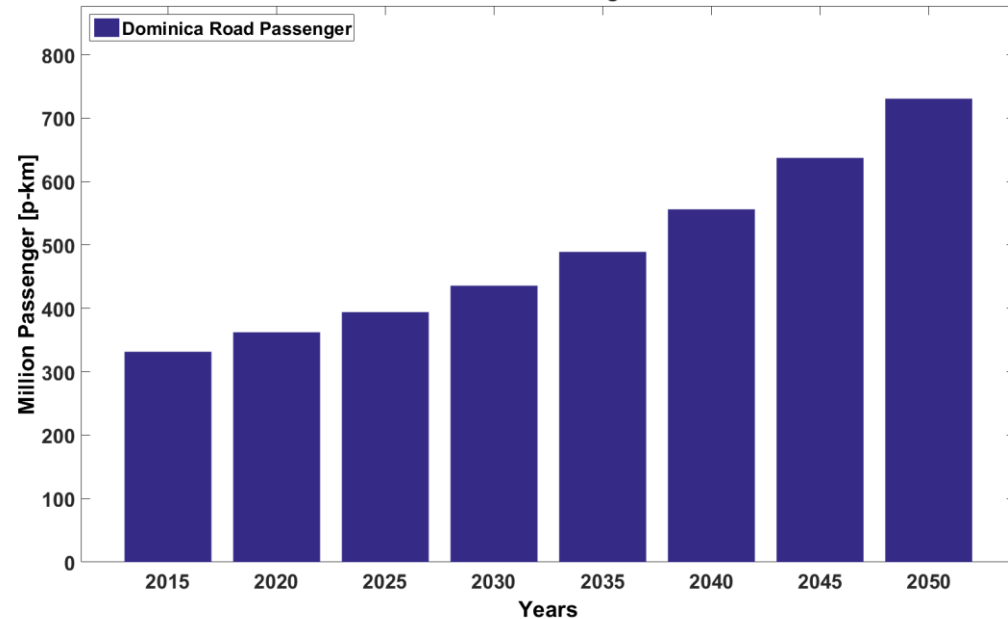

Dominica Road Freight Demand

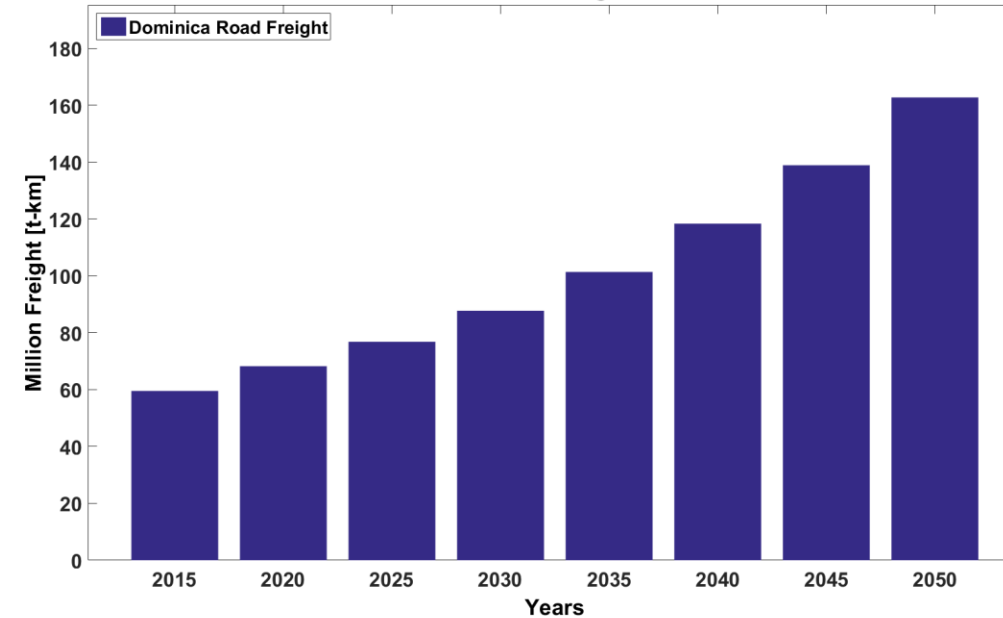

Dominica Rail Passenger Demand

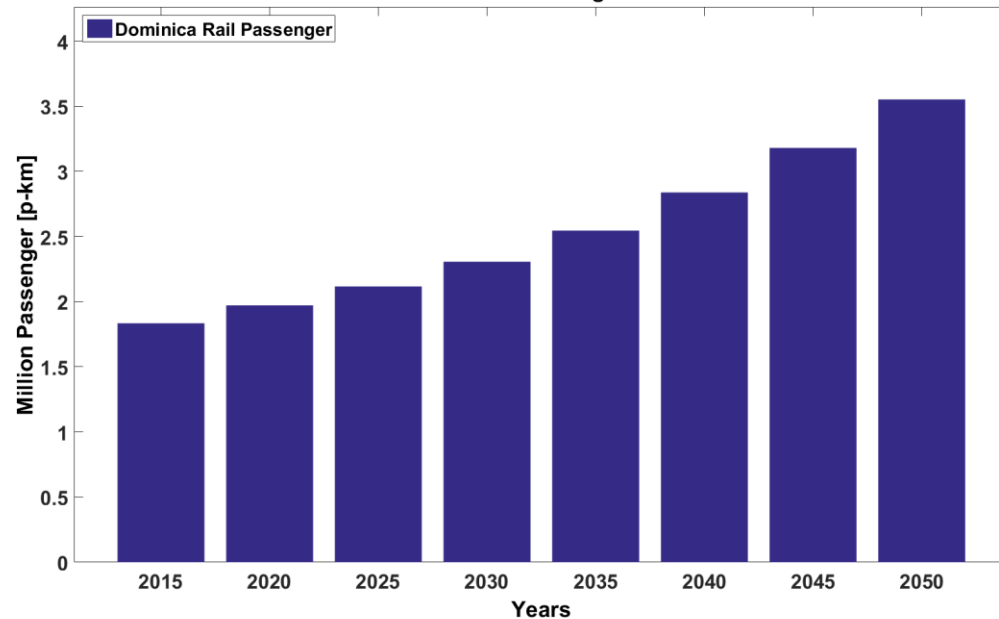

Dominica Rail Freight Demand

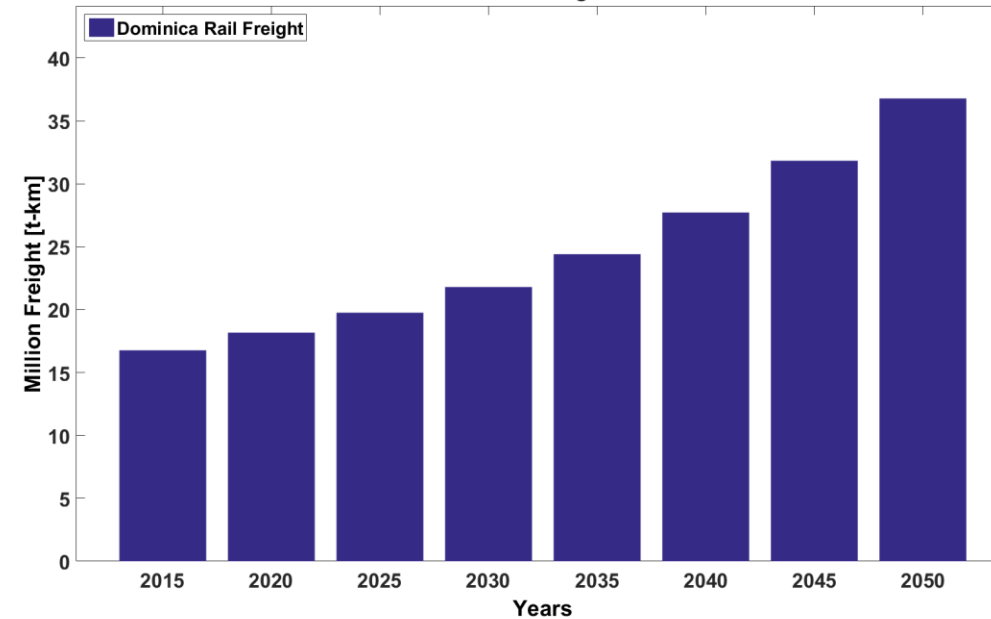

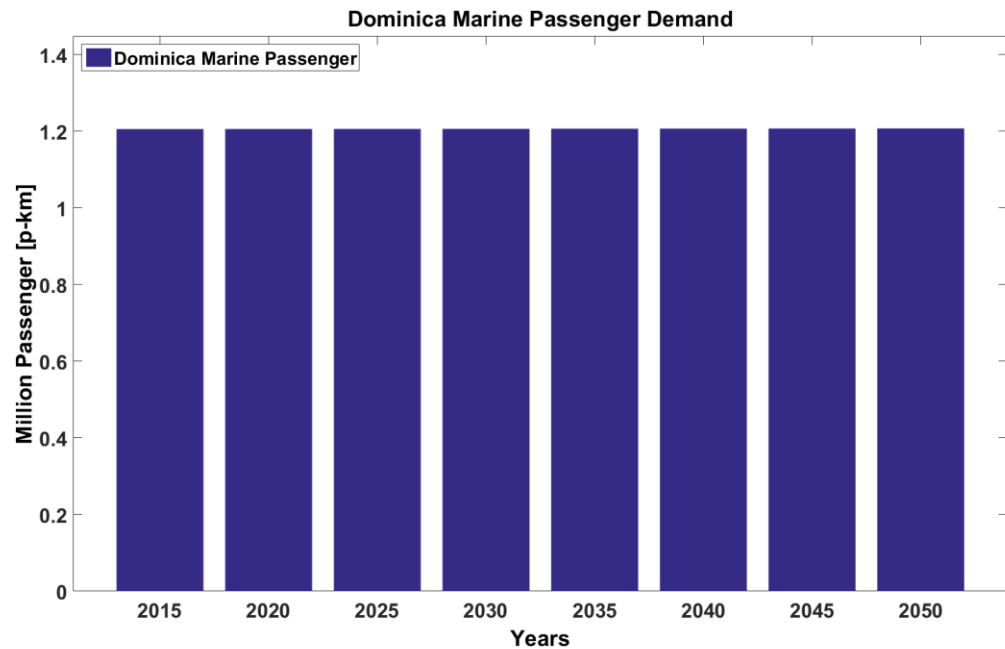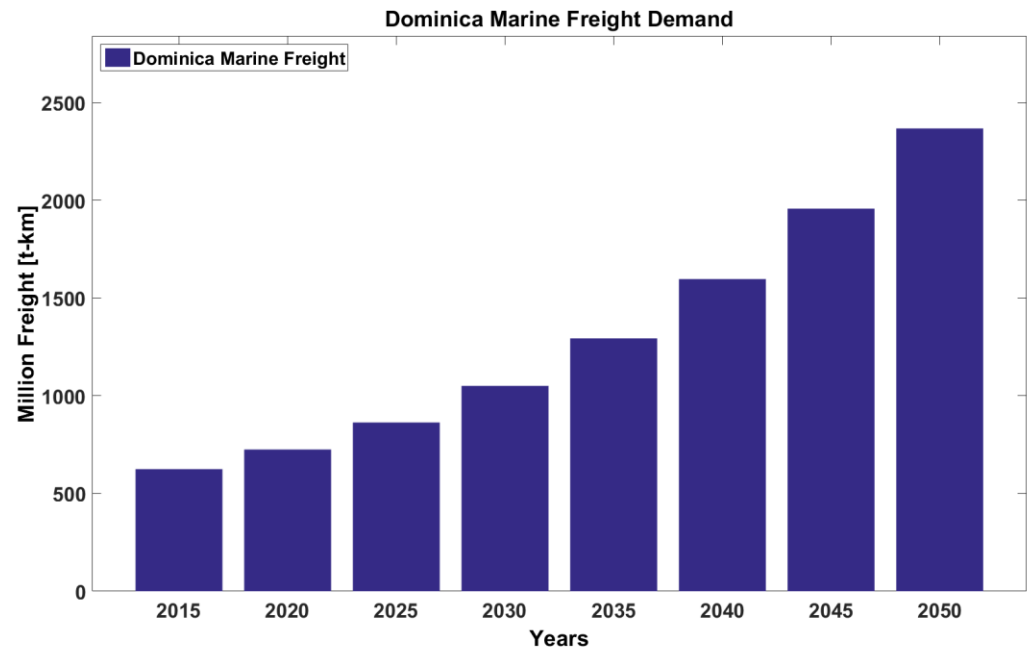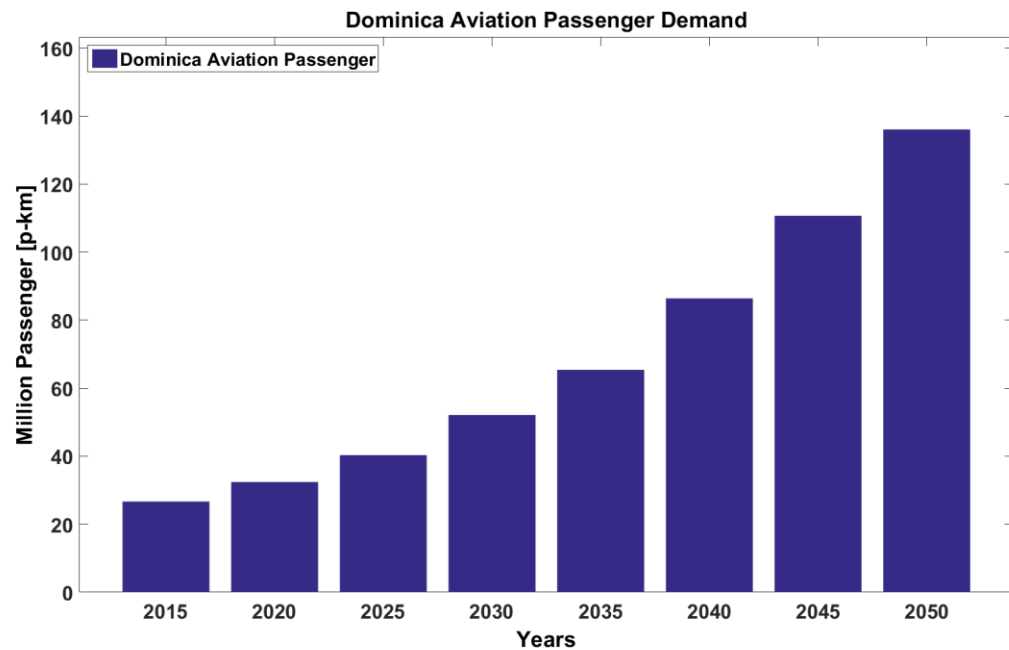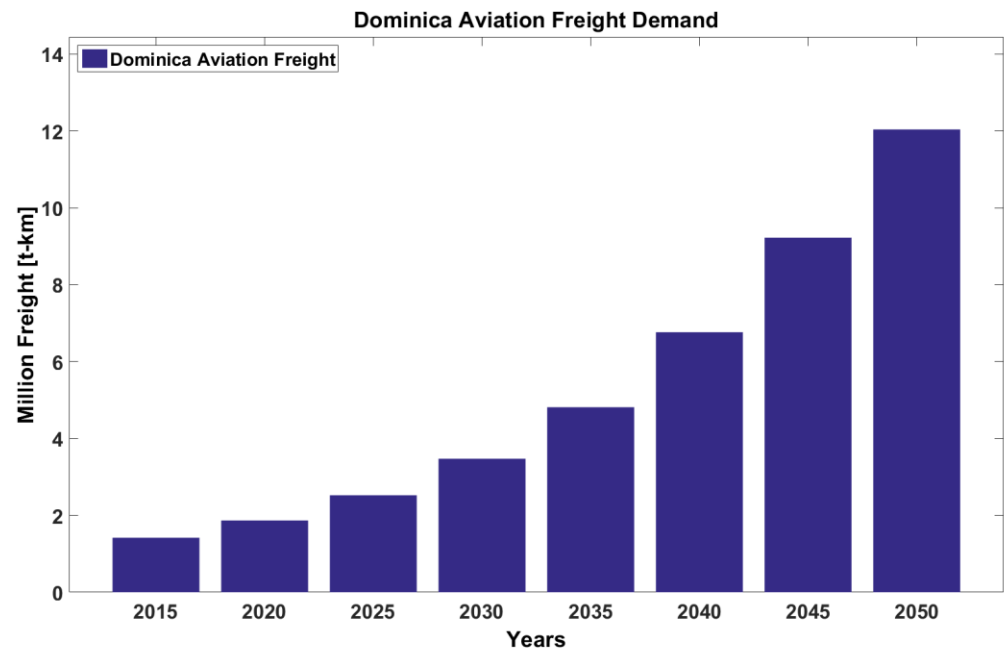

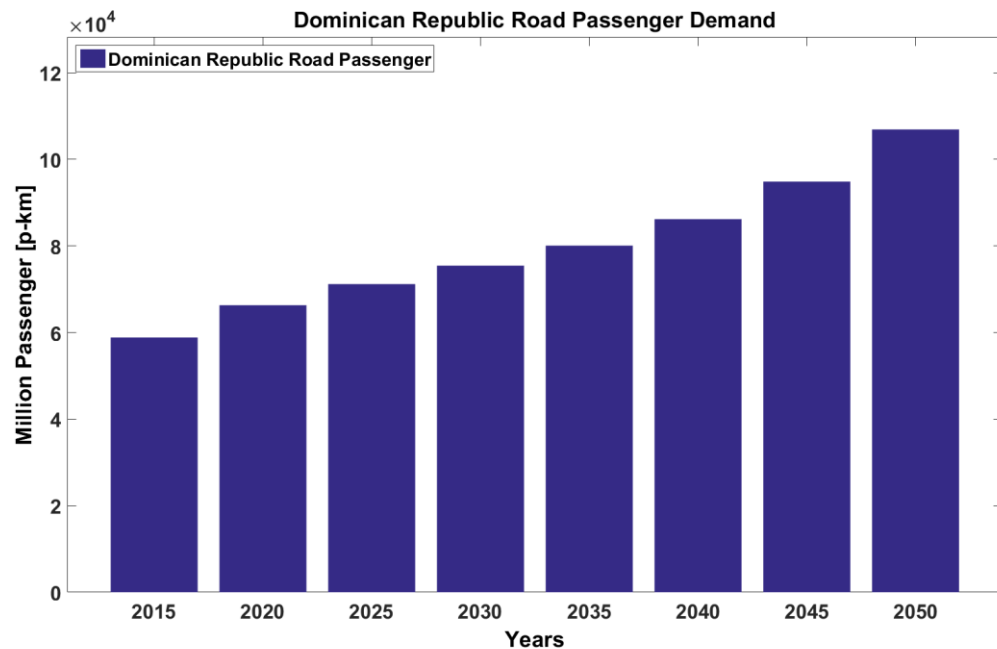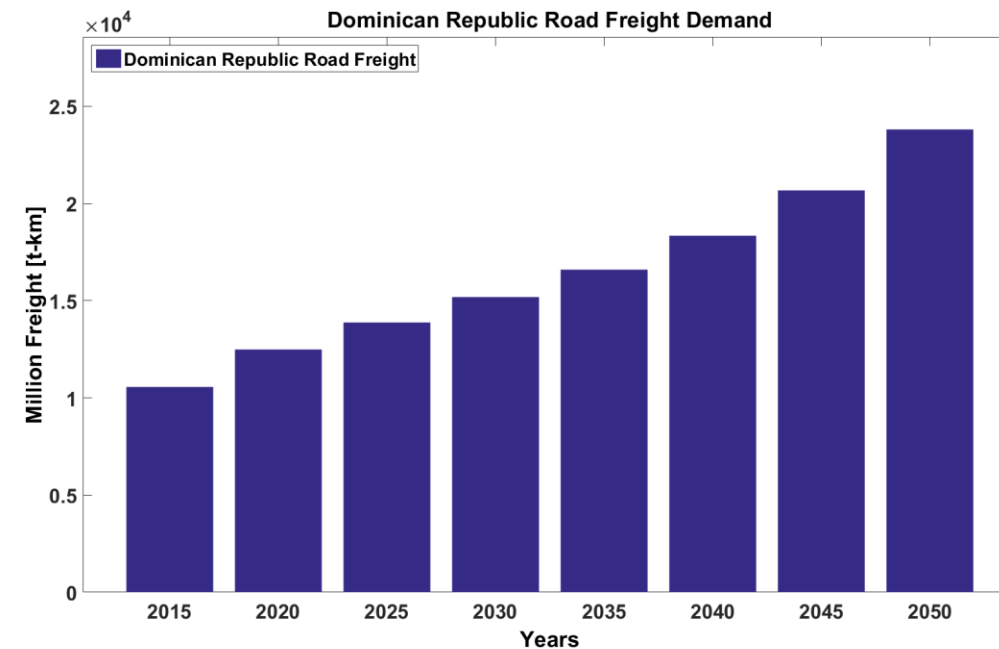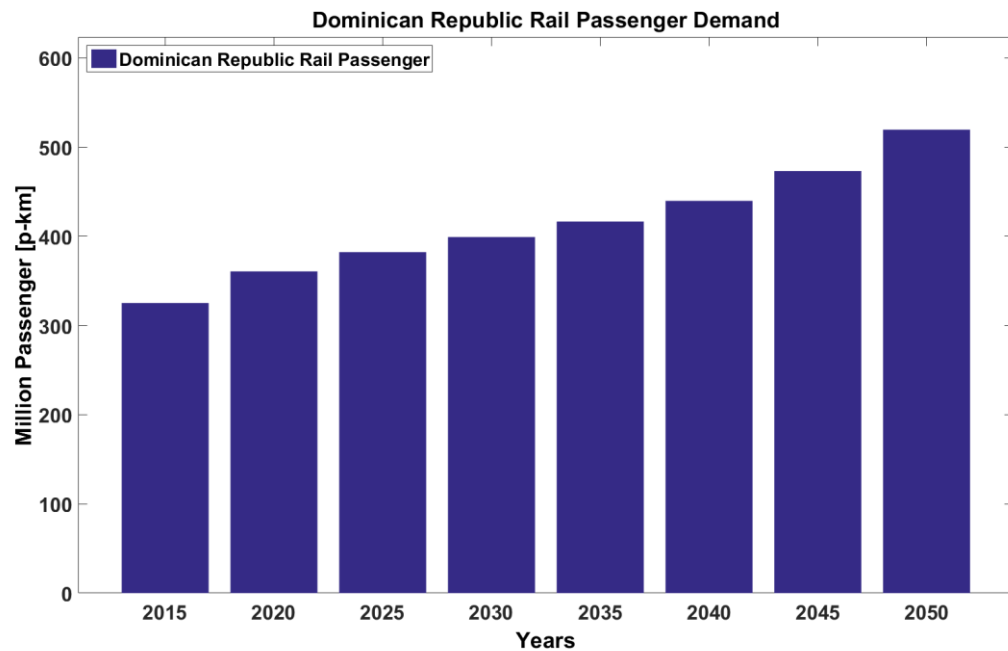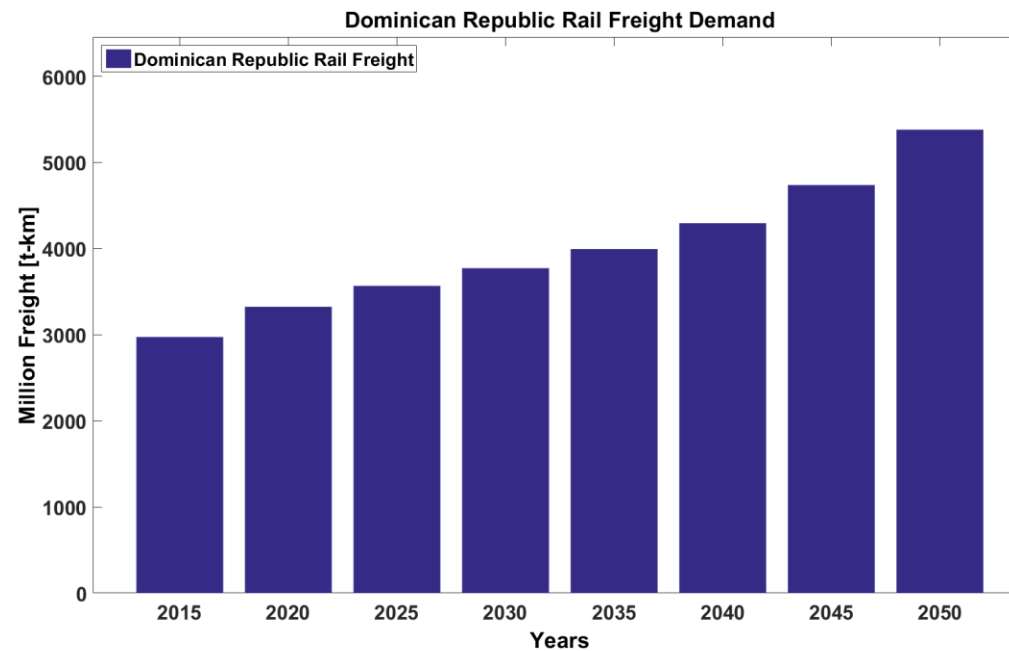

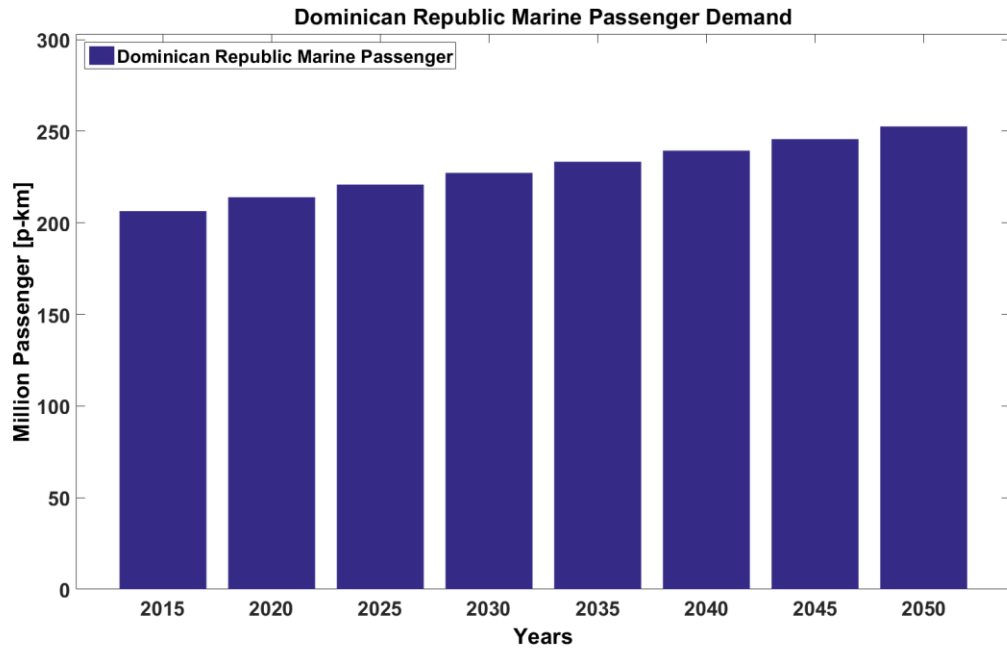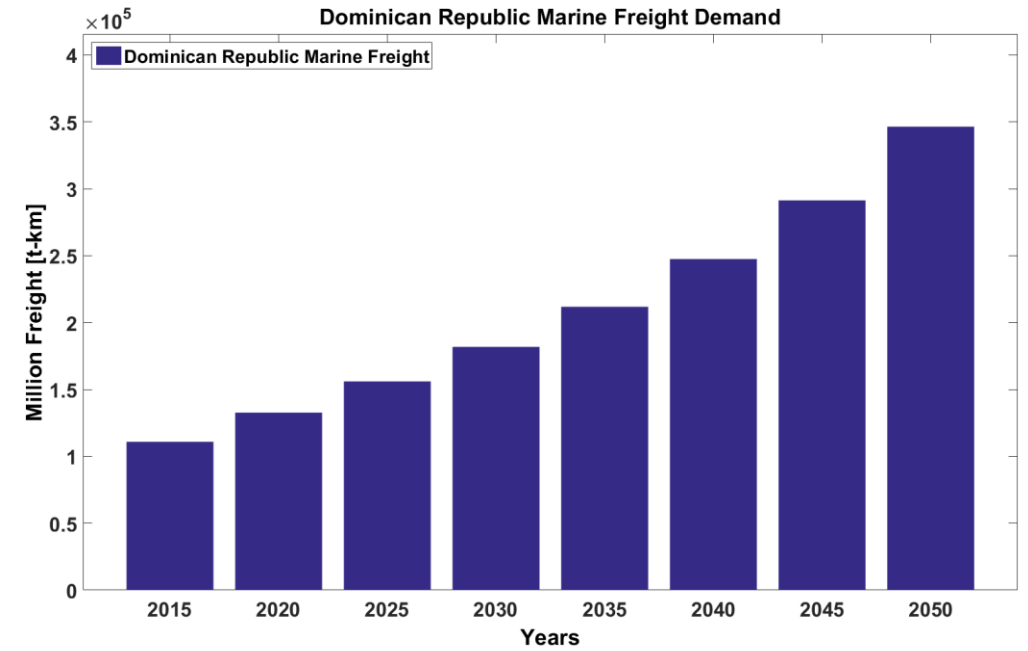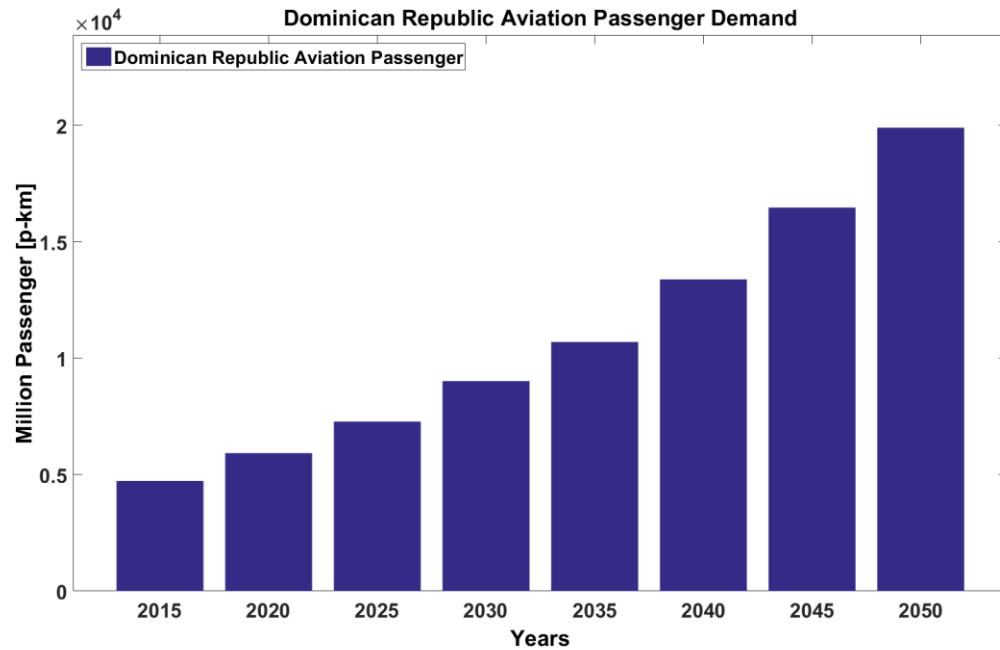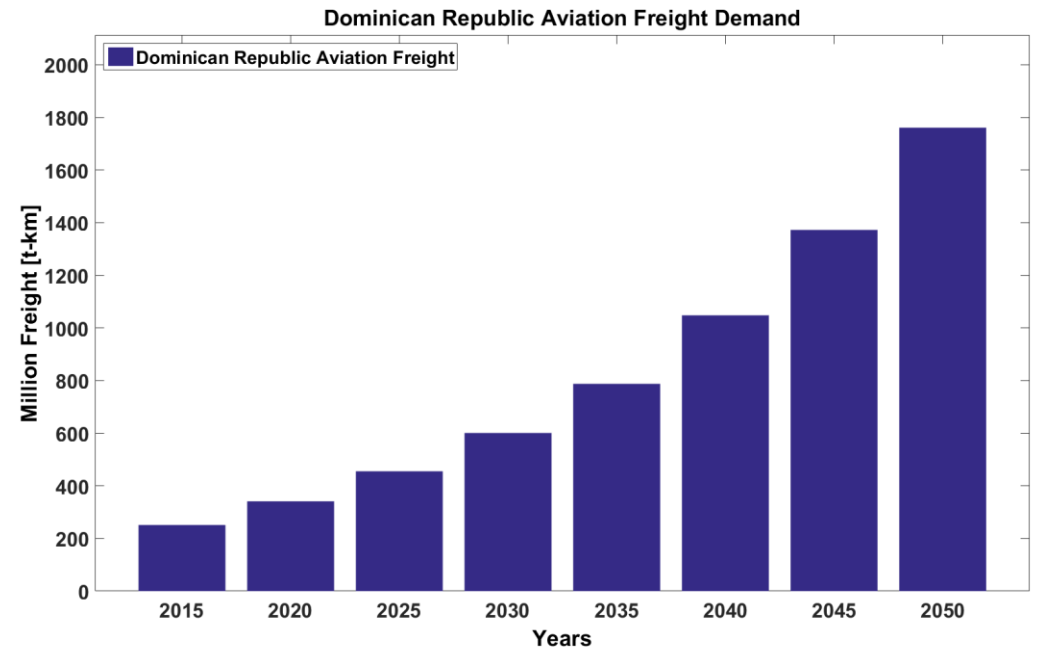

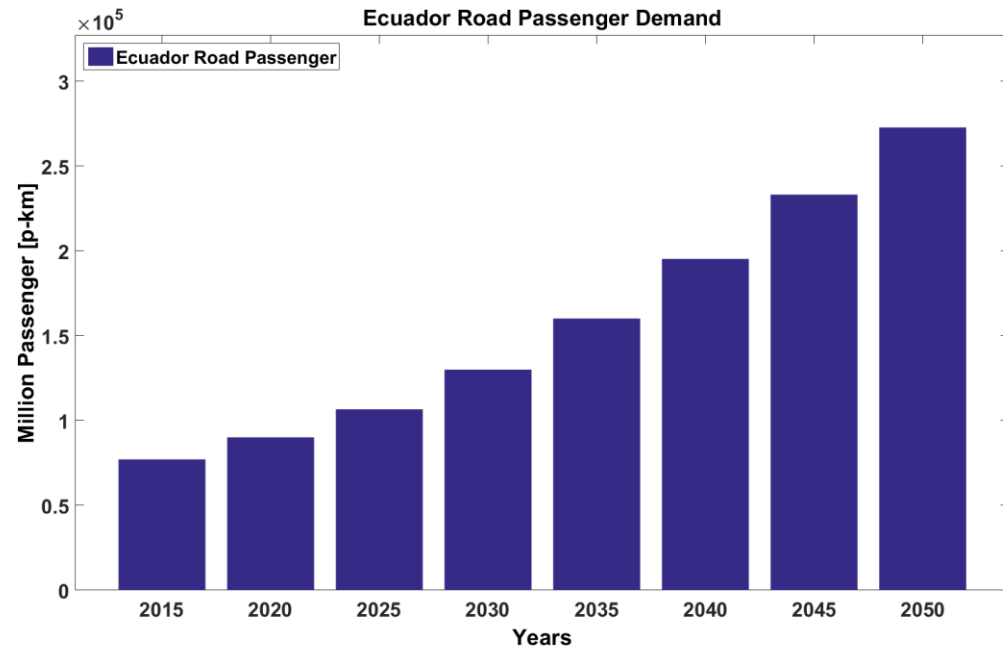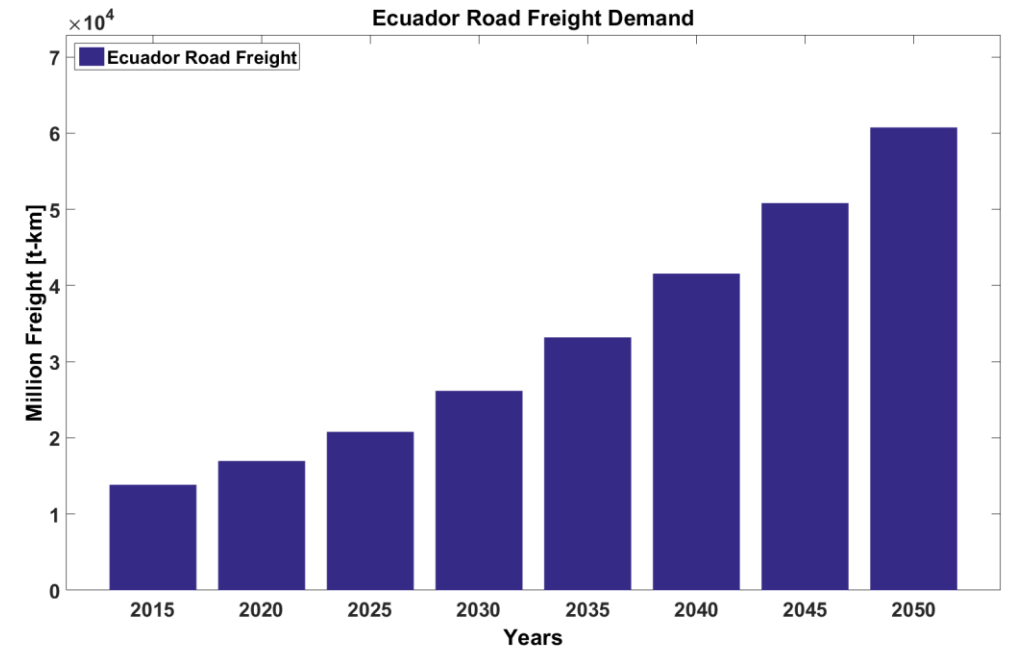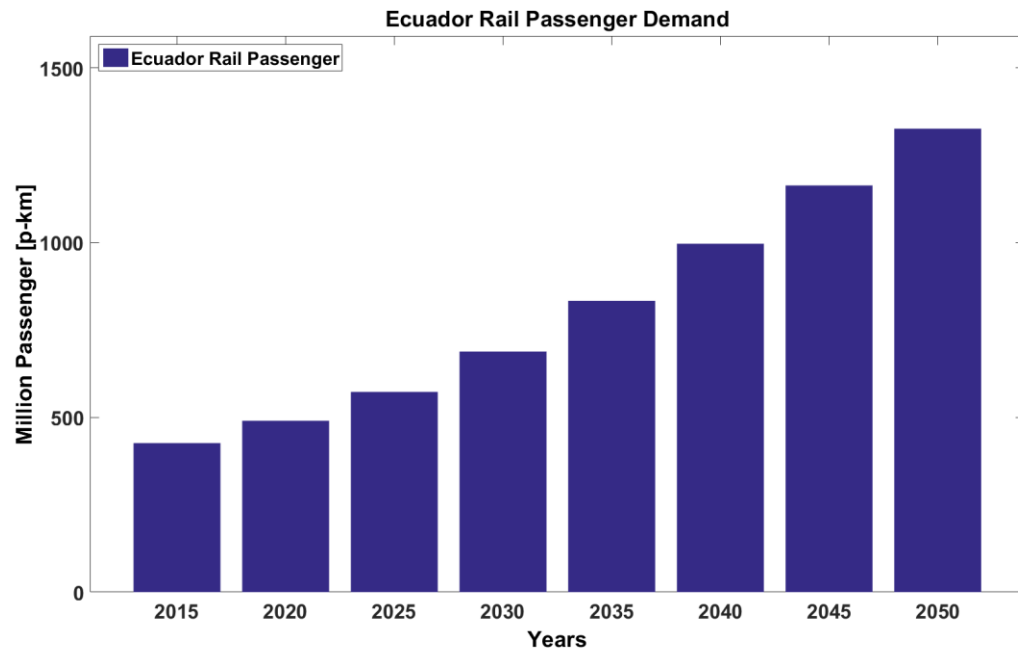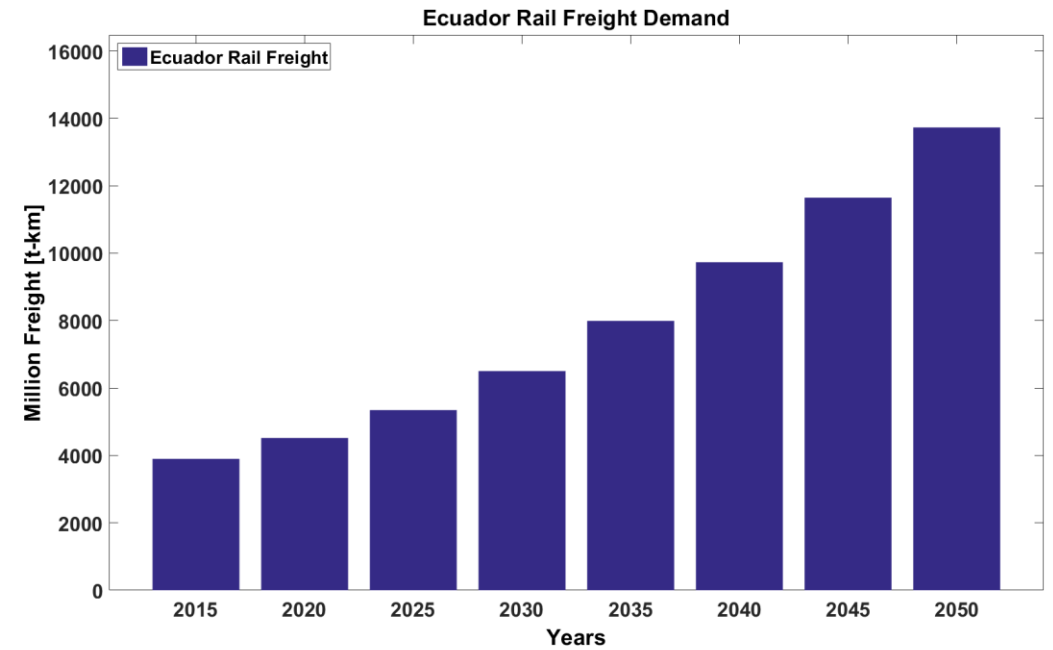

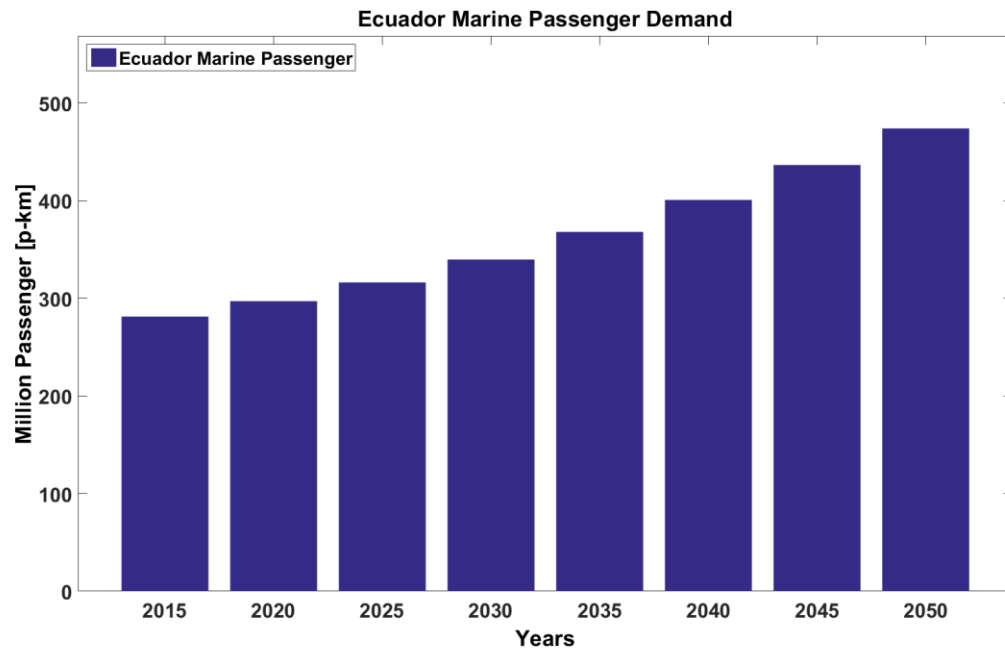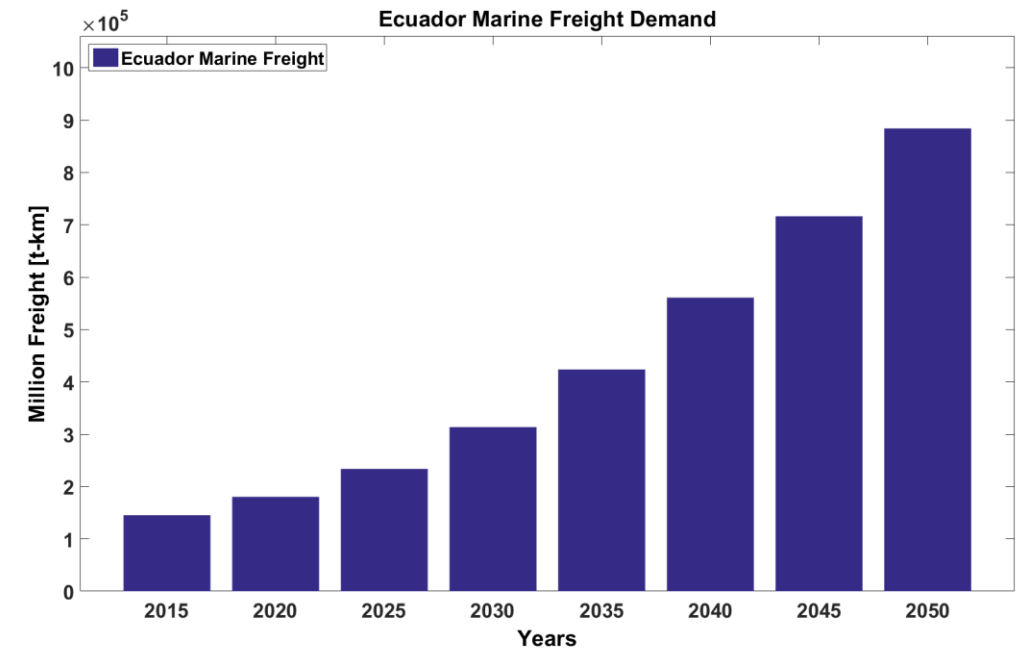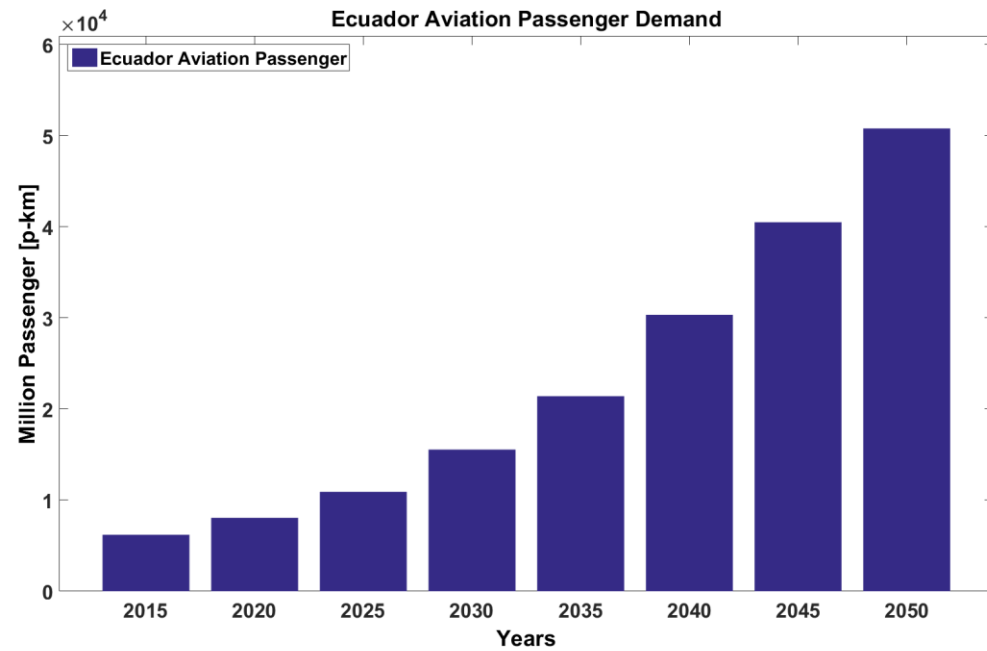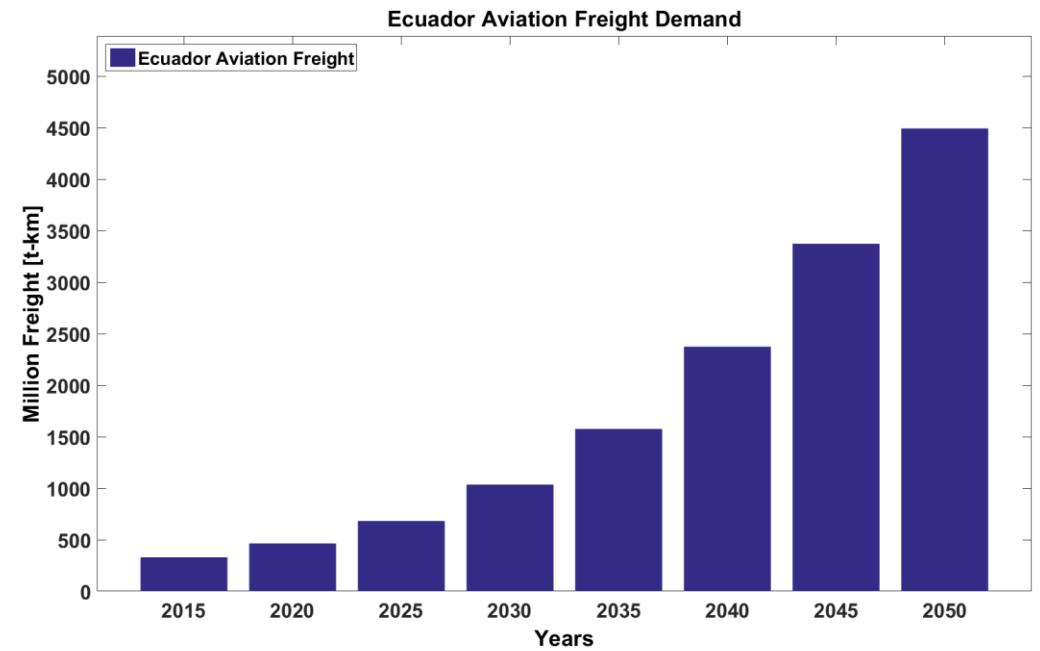

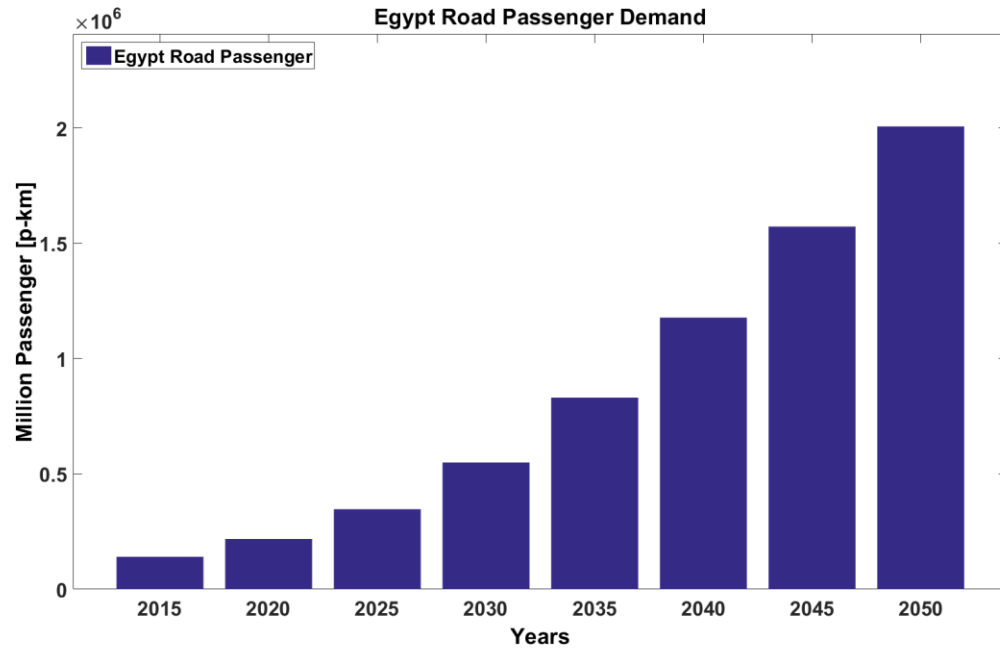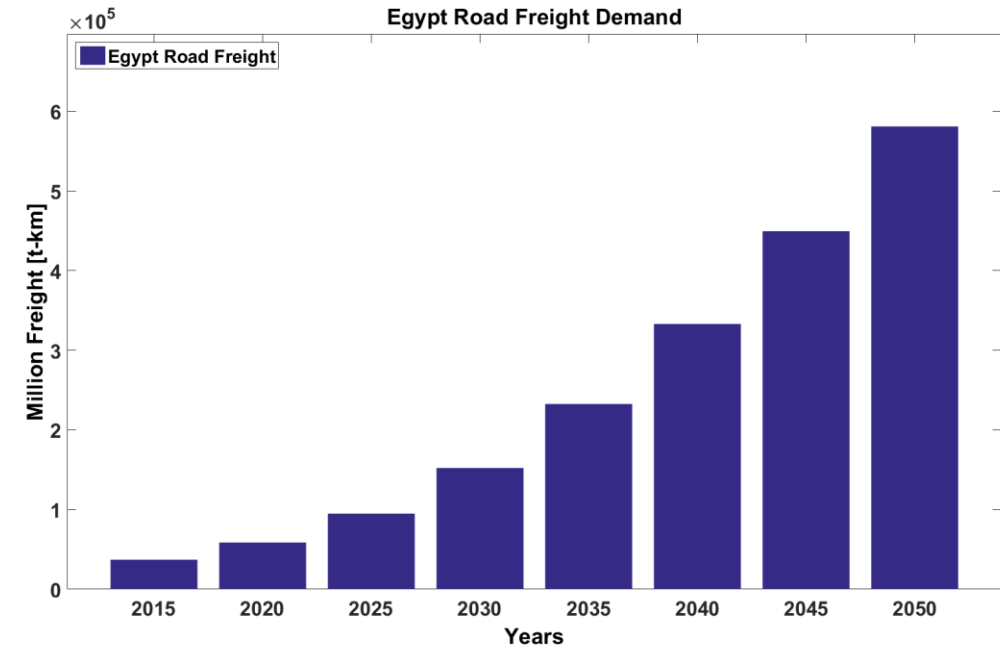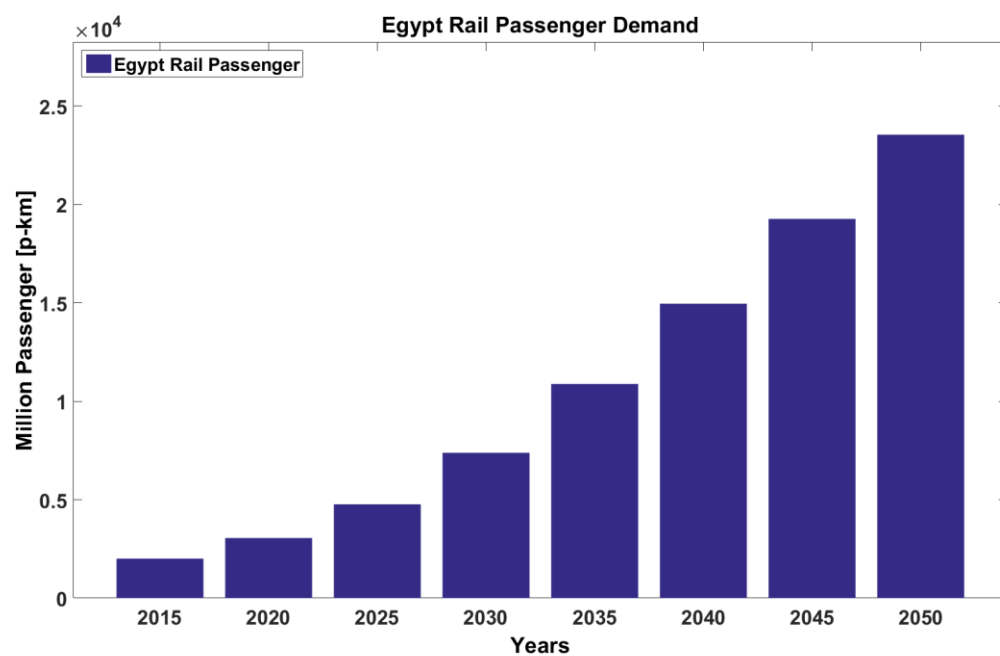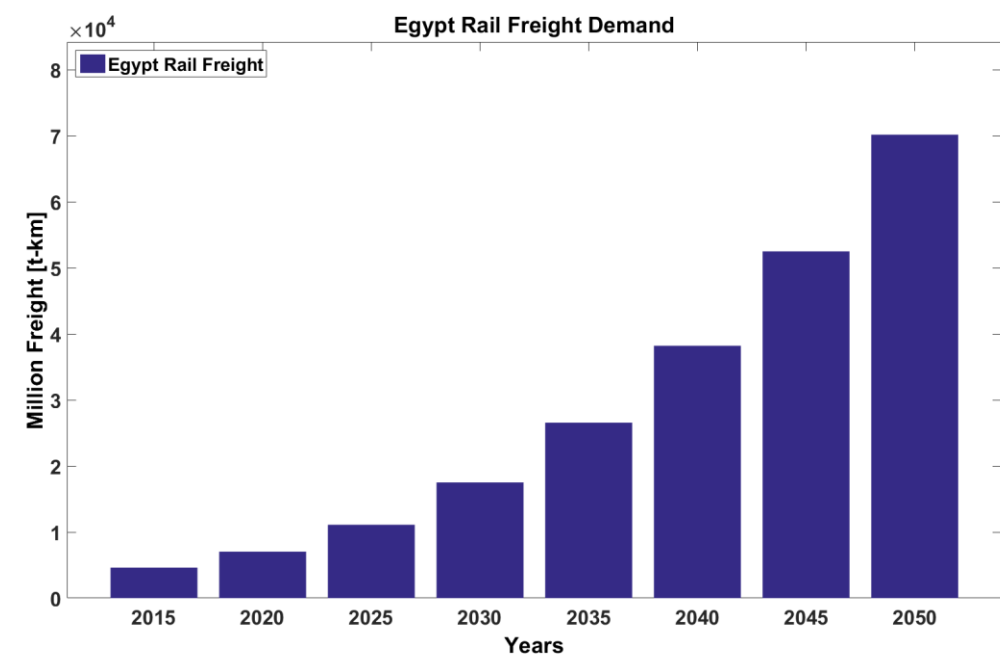

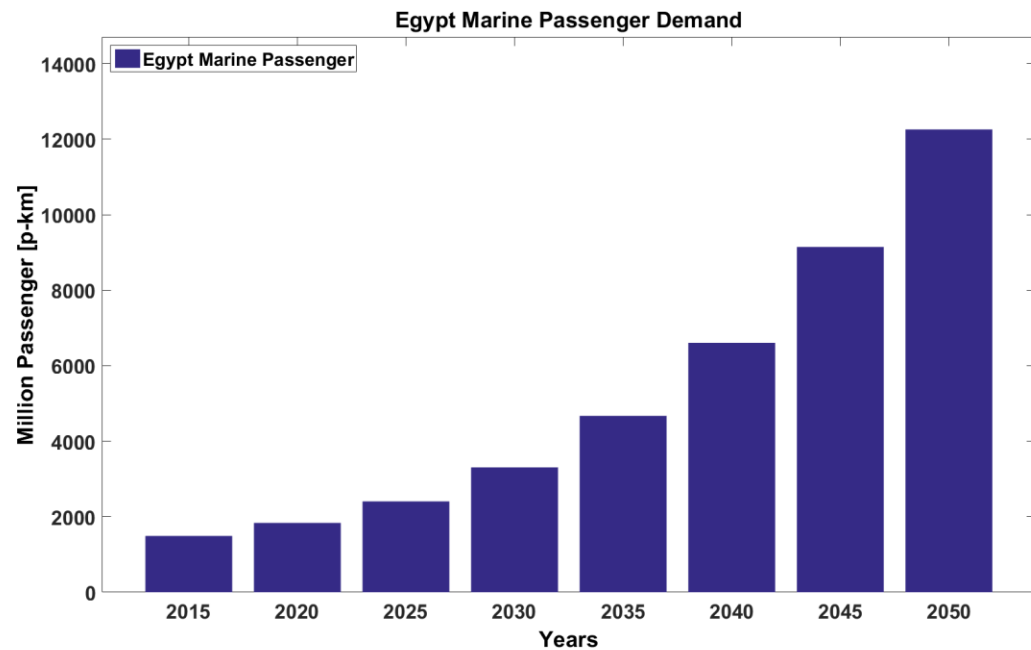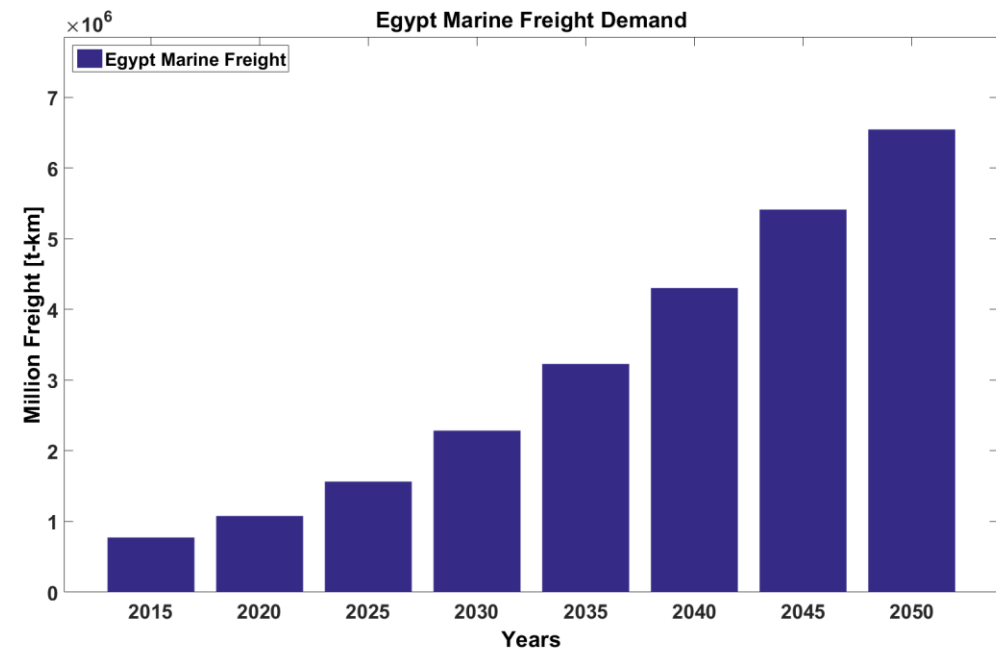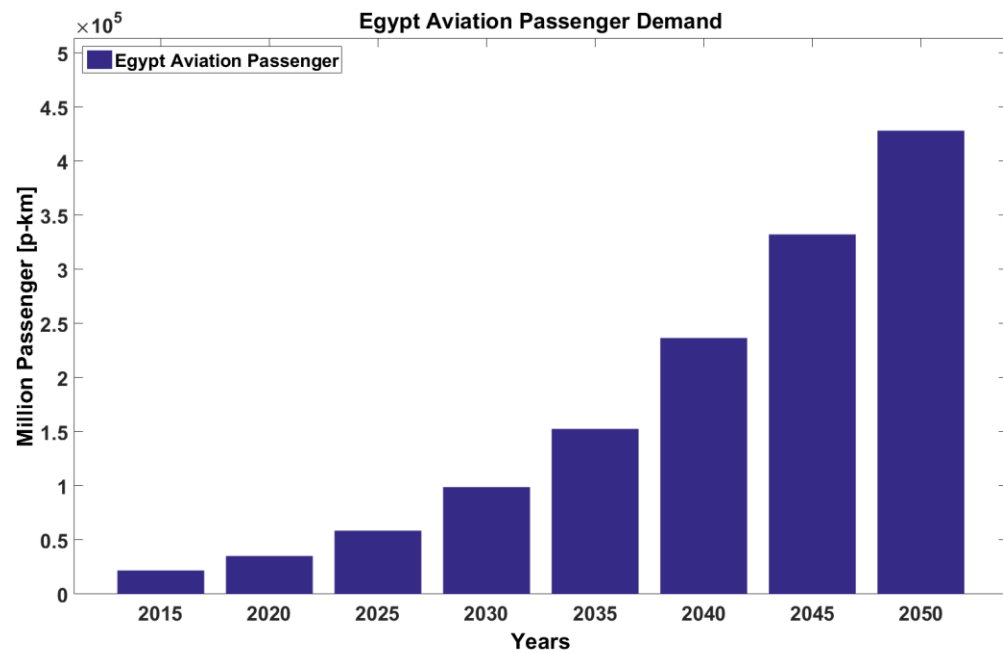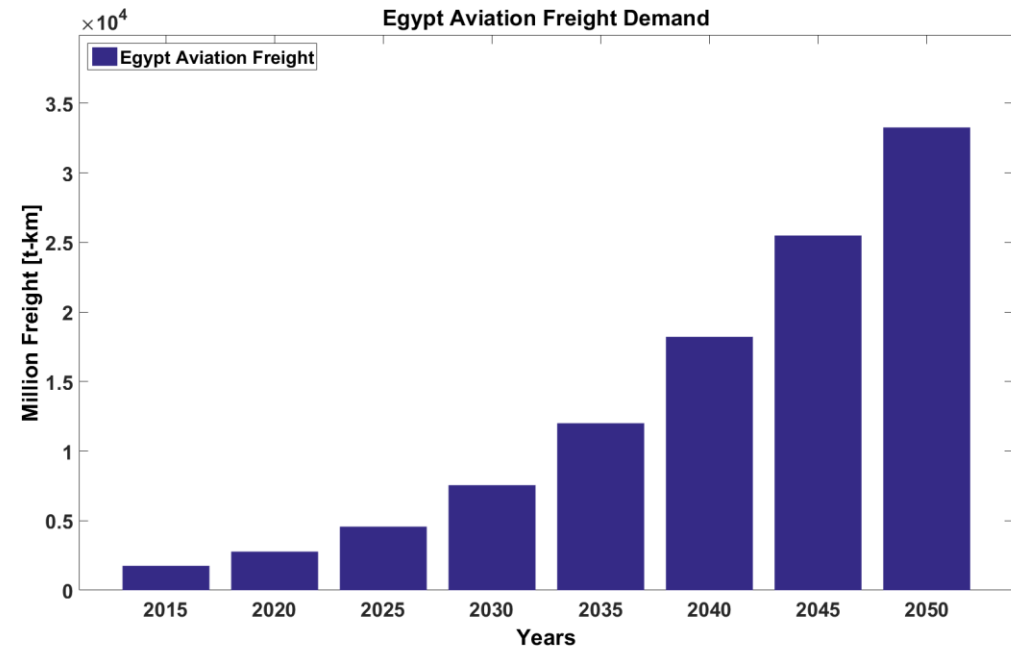

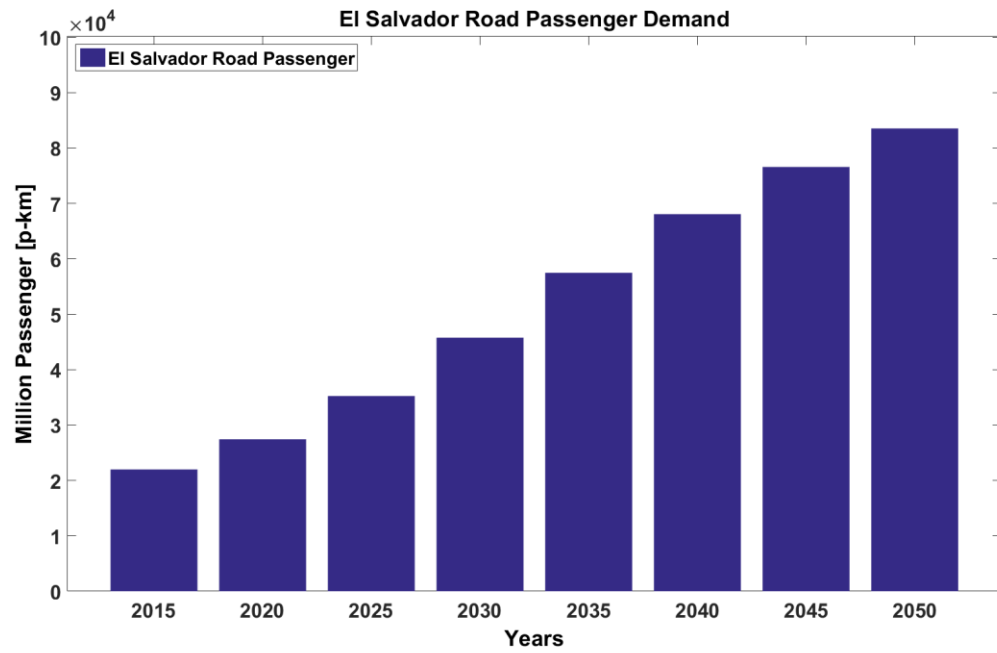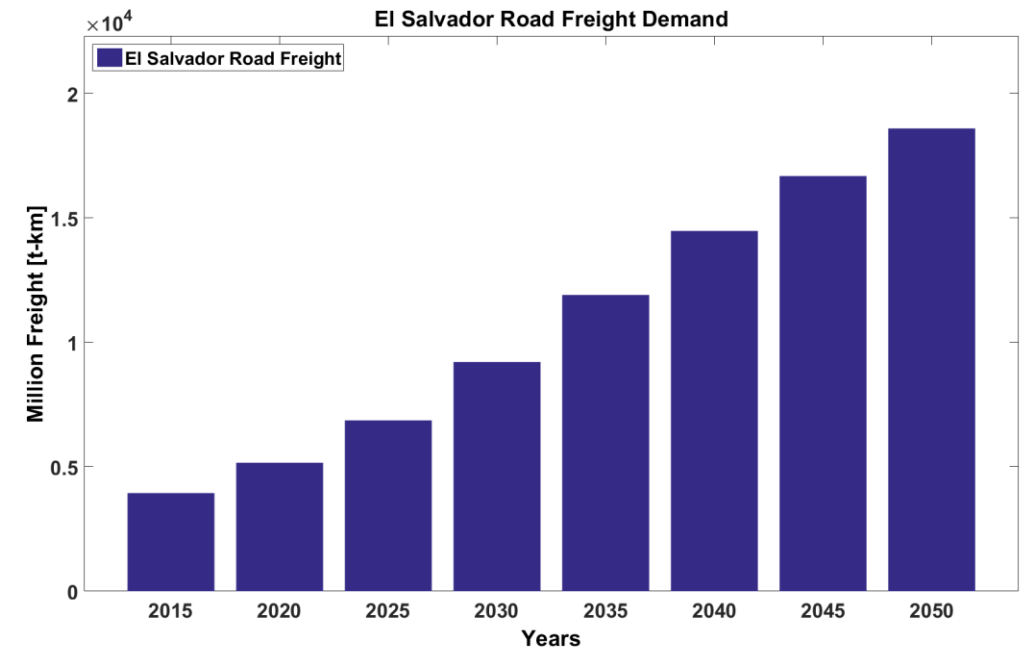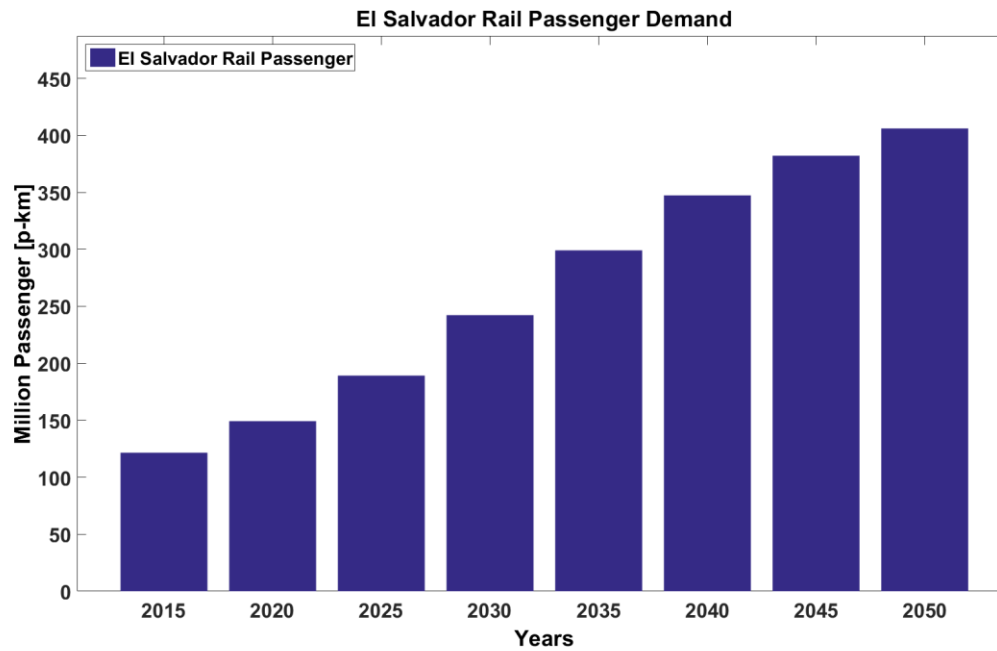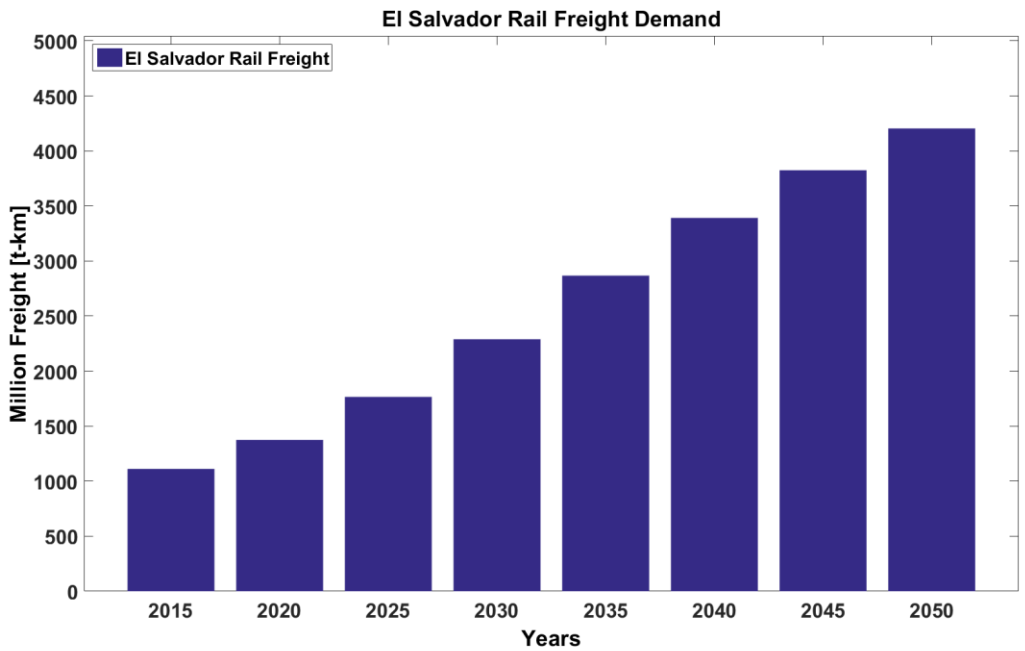

El Salvador Marine Passenger Demand

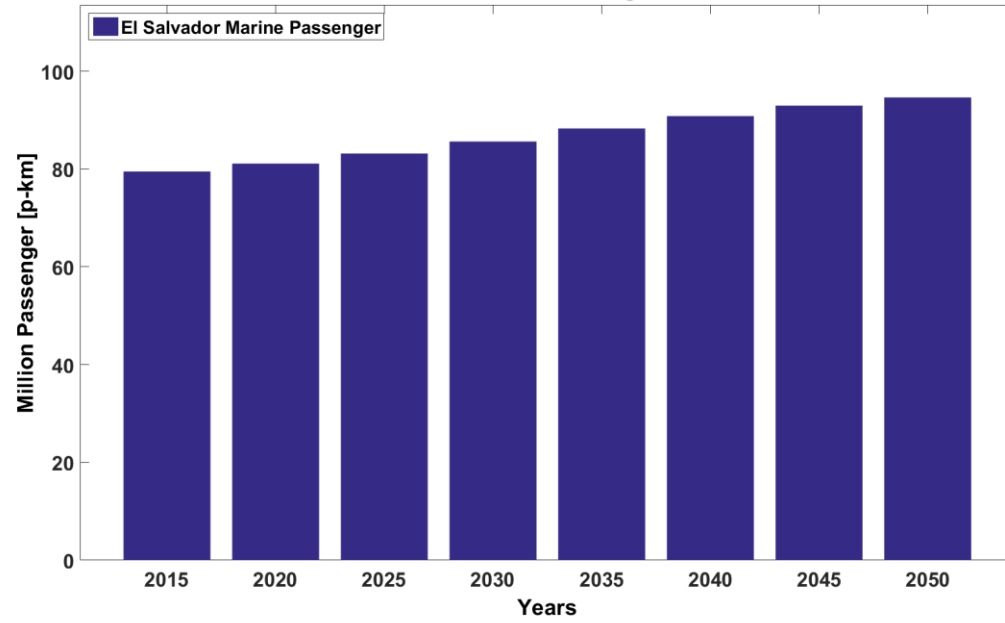

El Salvador Marine Freight Demand

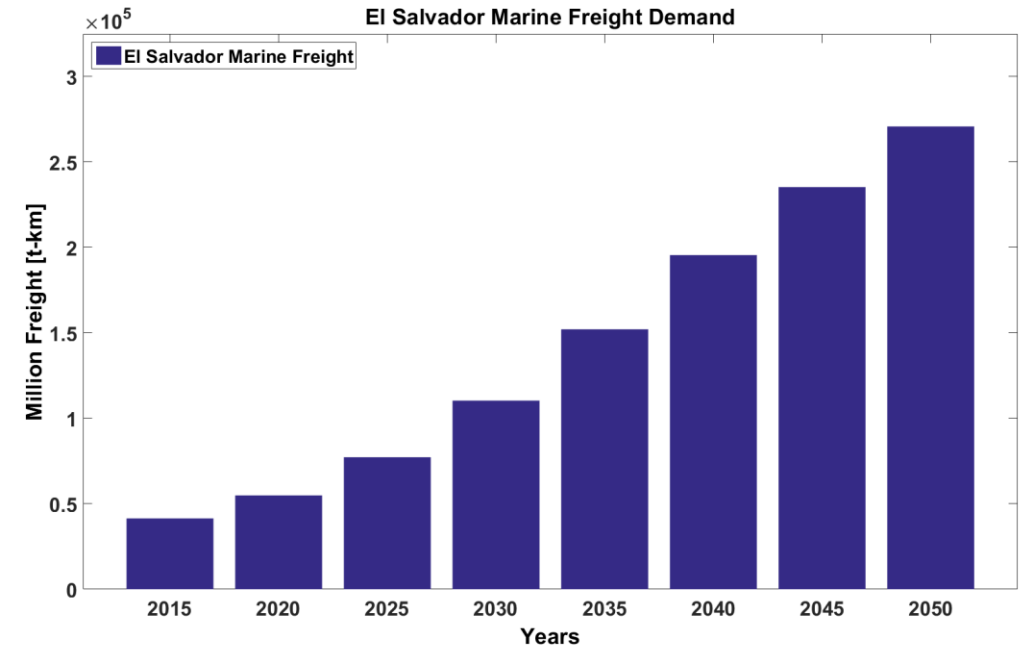

El Salvador Aviation Passenger Demand

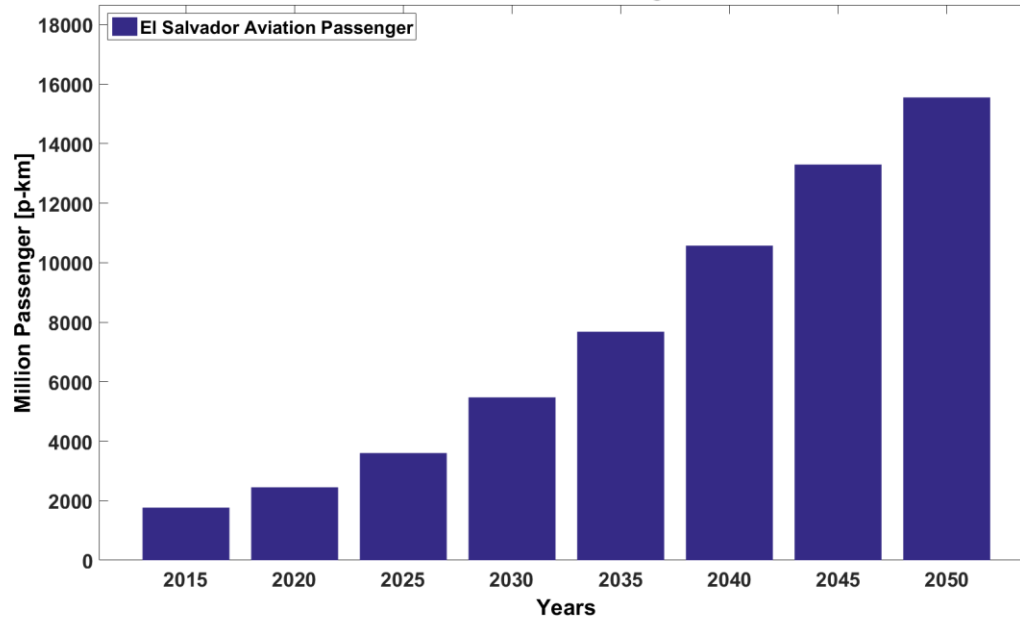

El Salvador Aviation Freight Demand

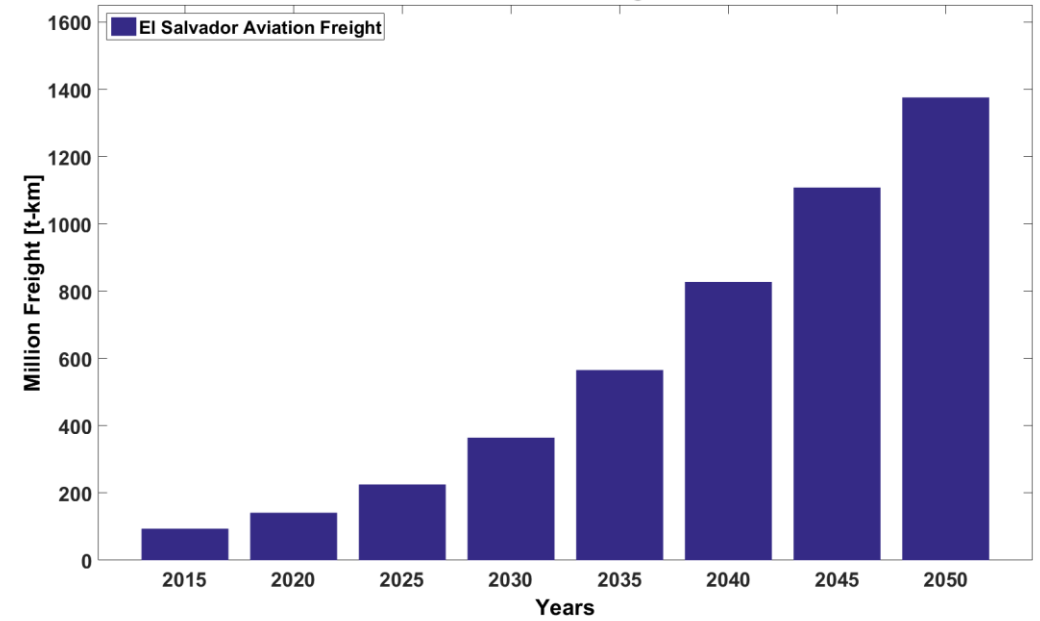

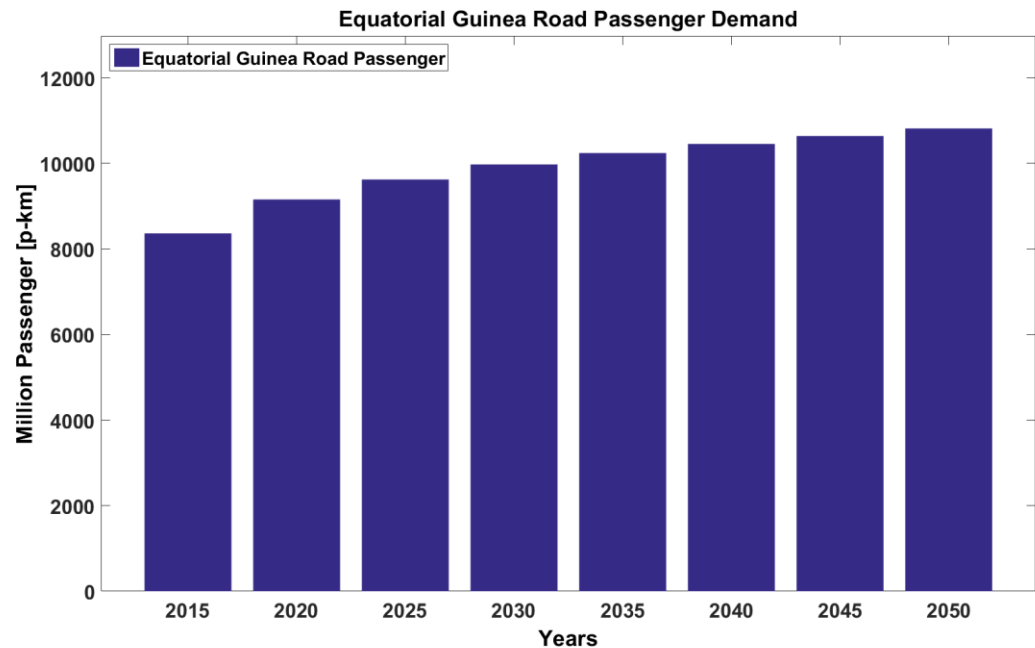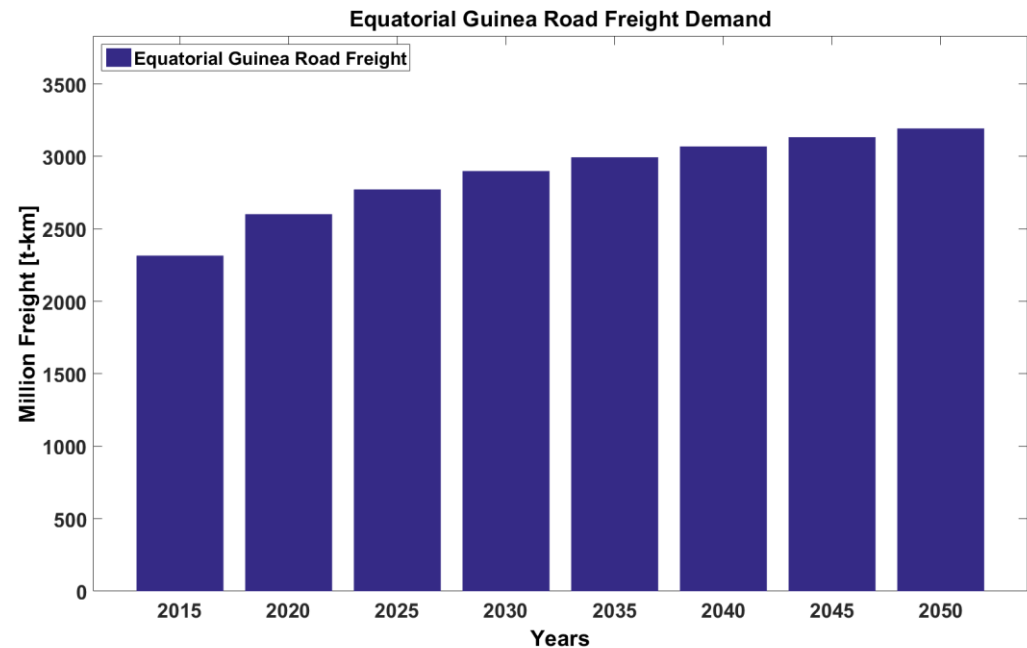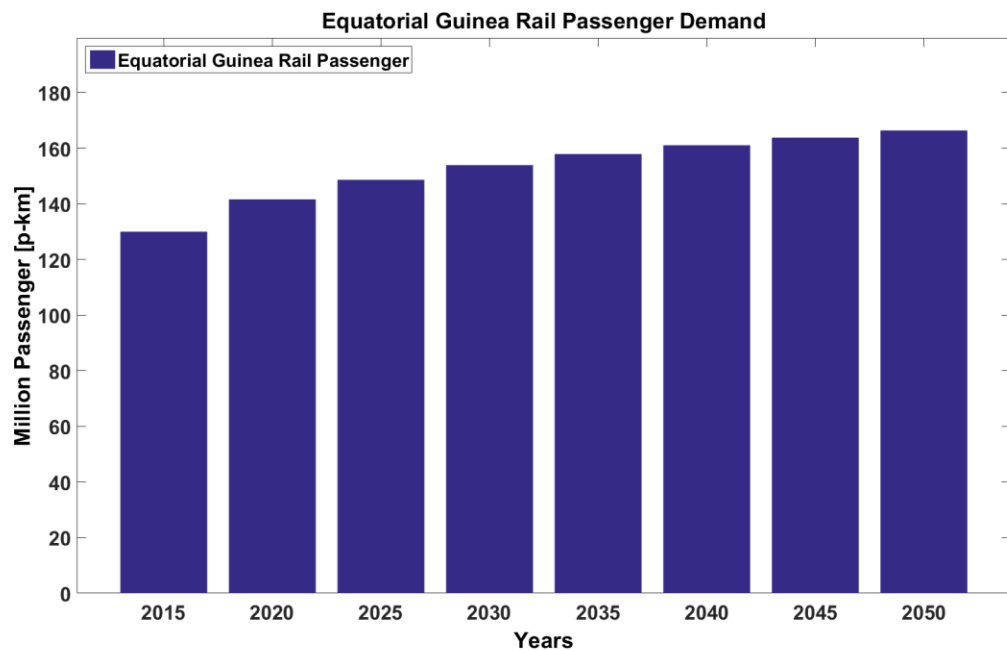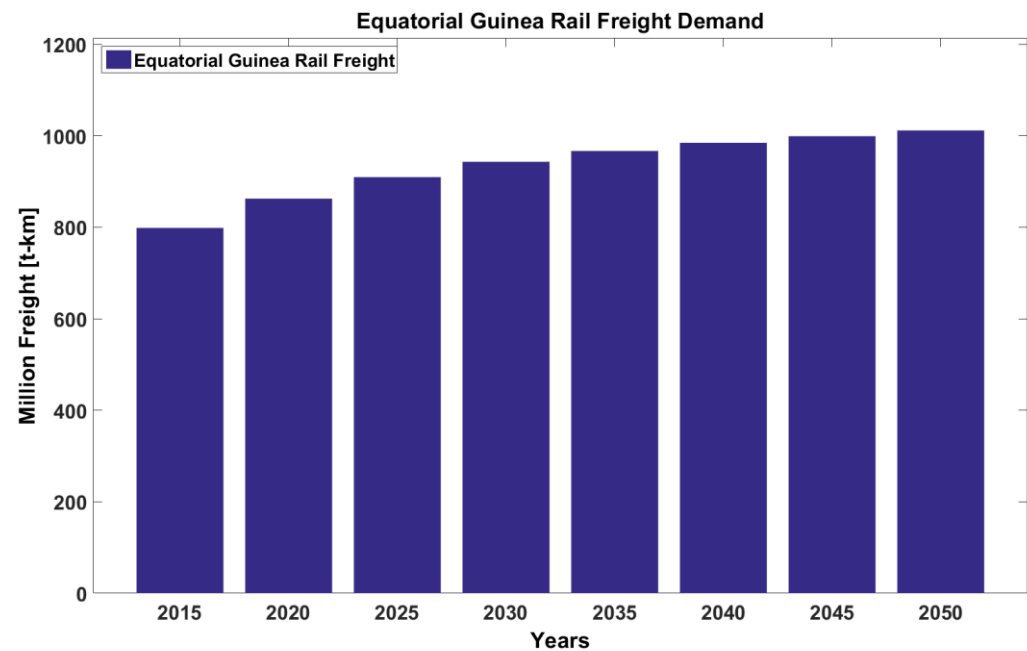

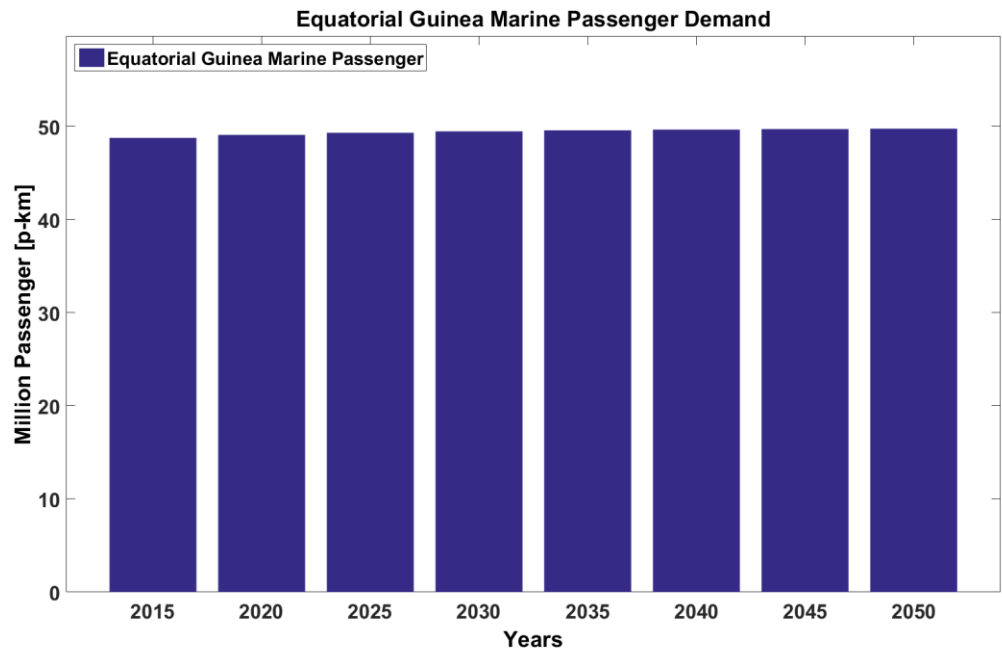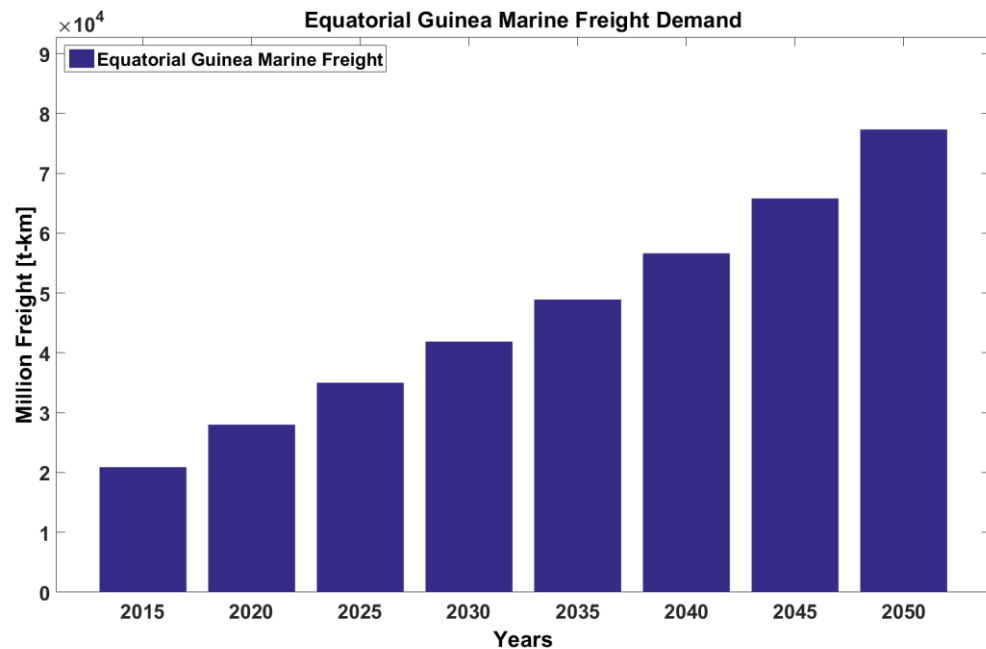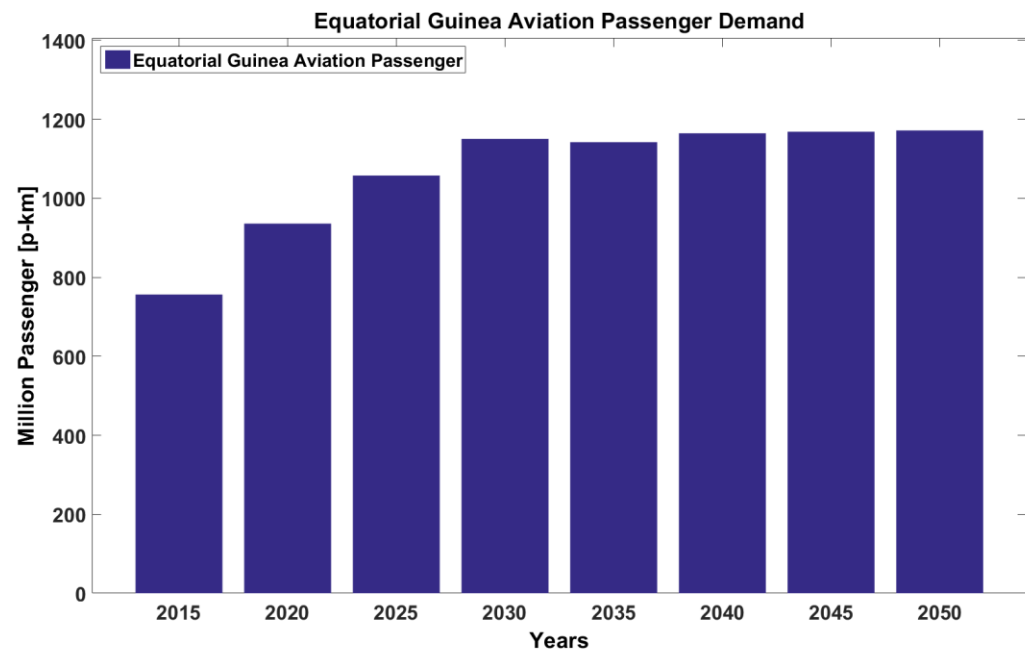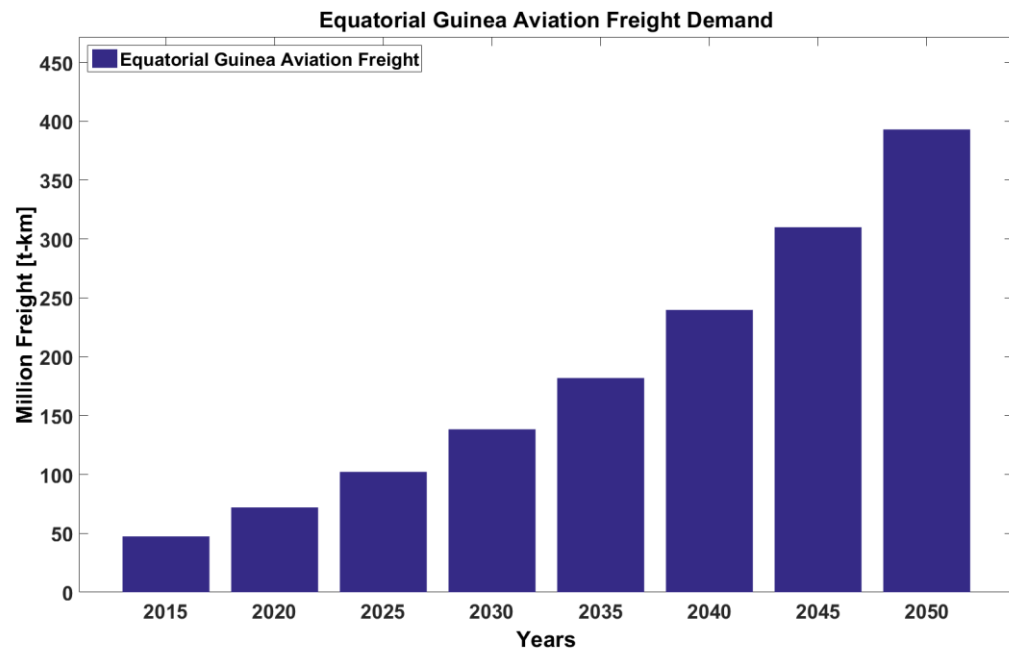

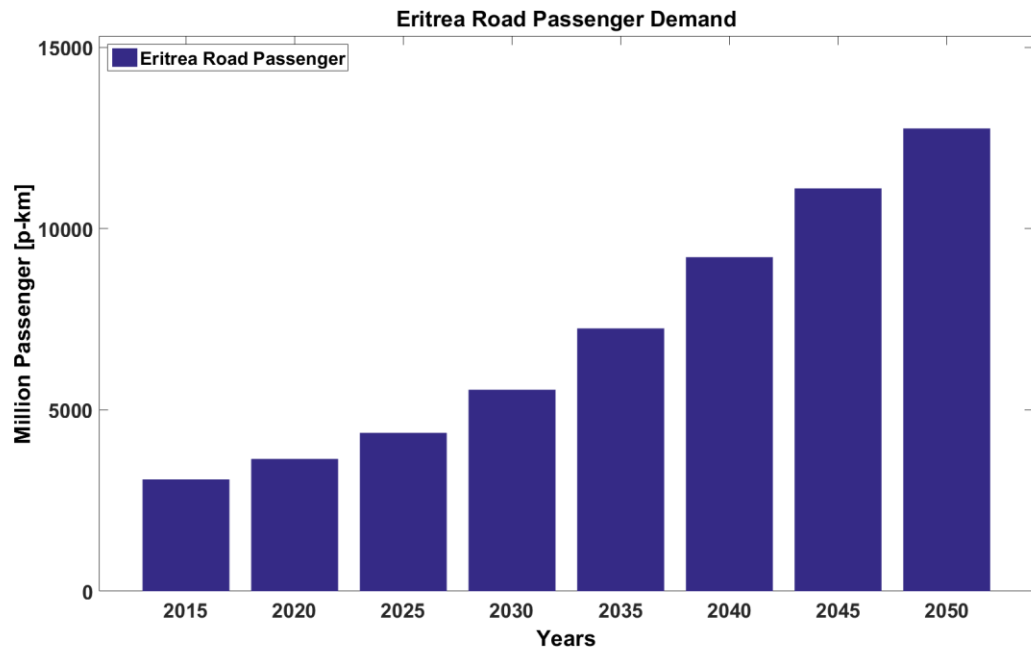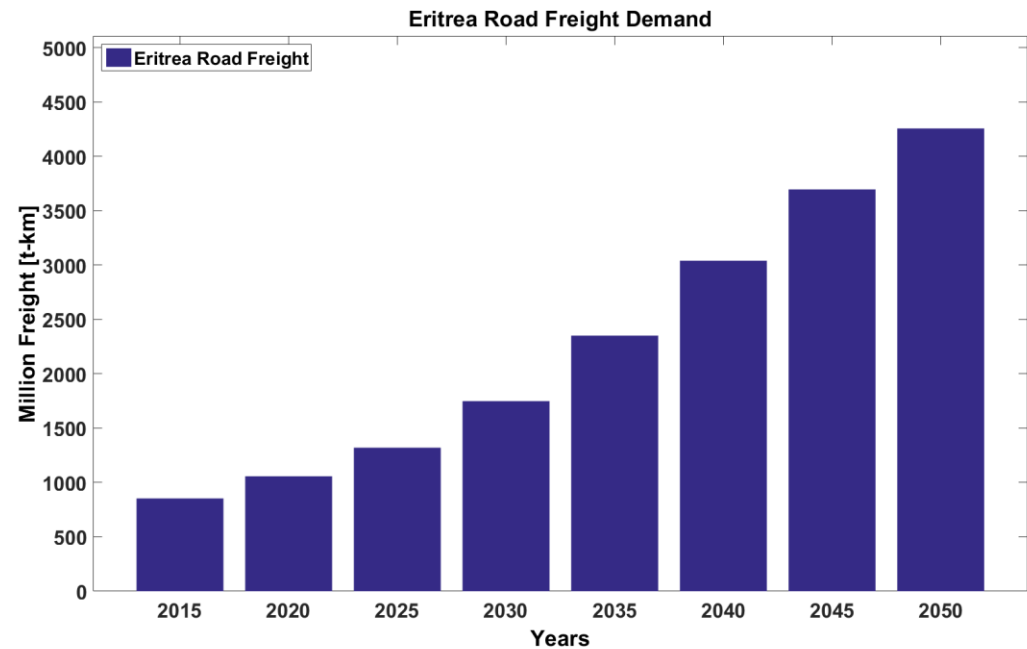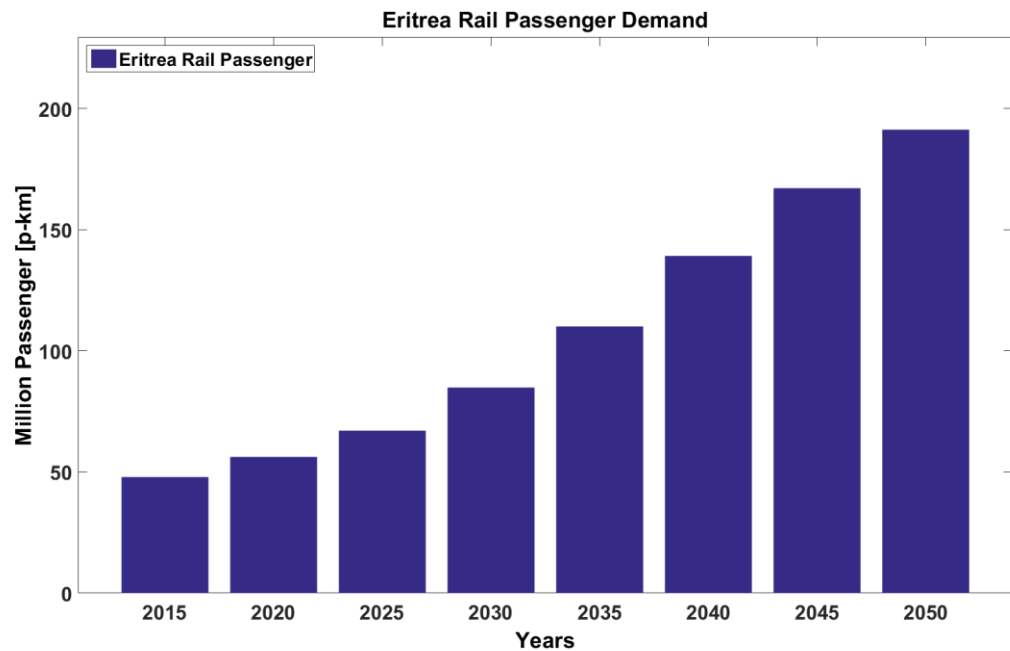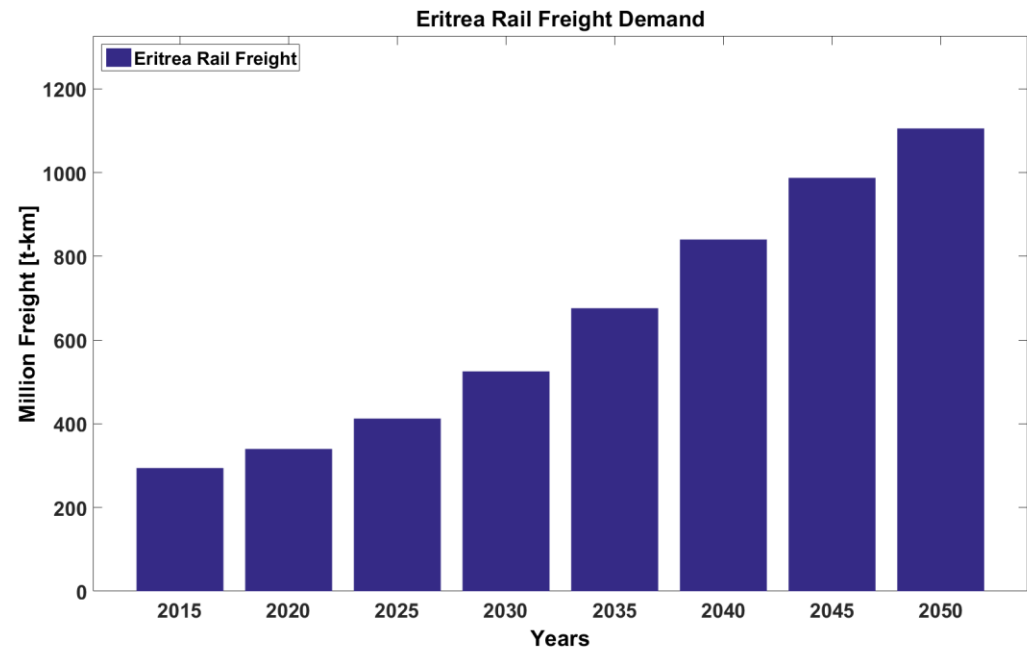

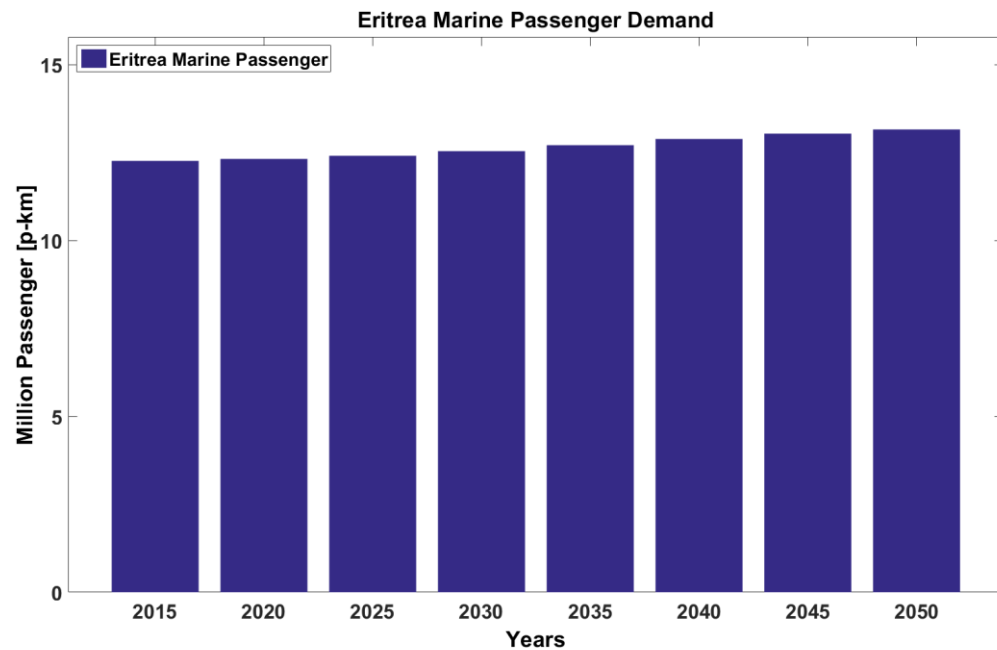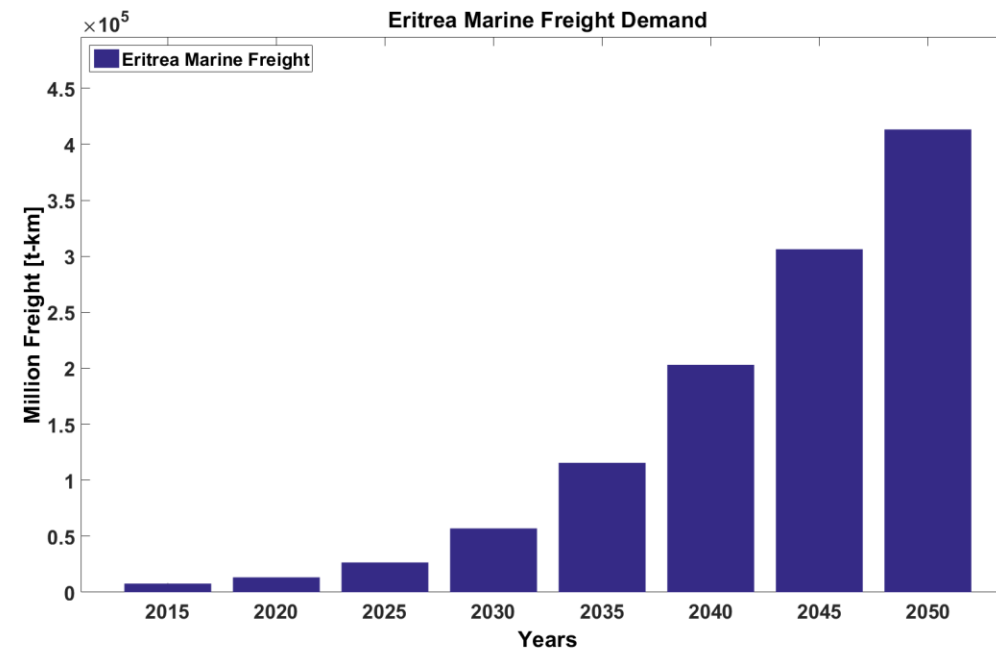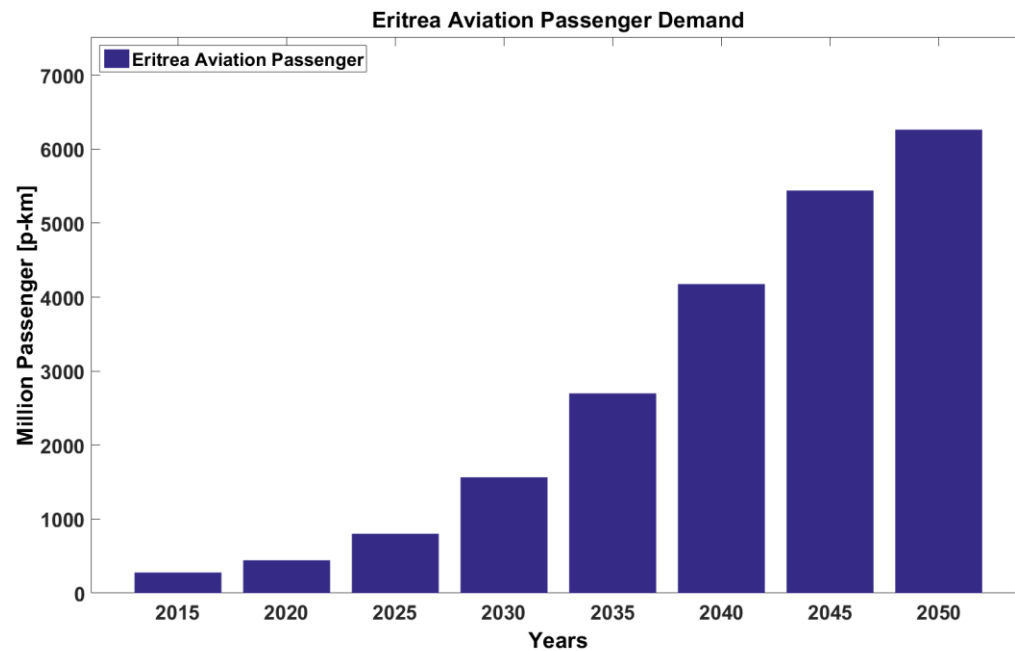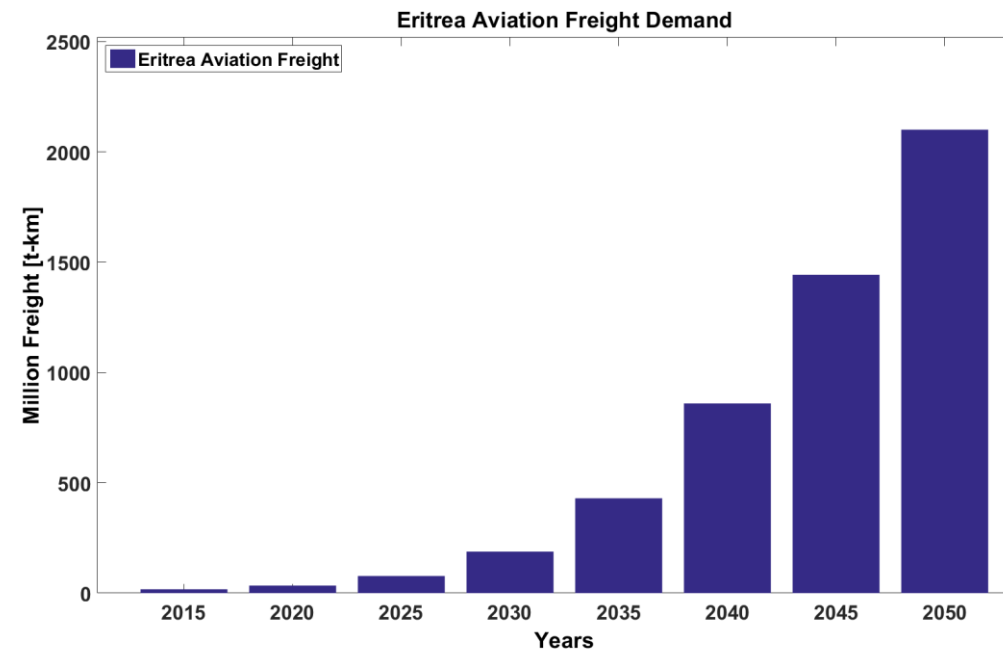

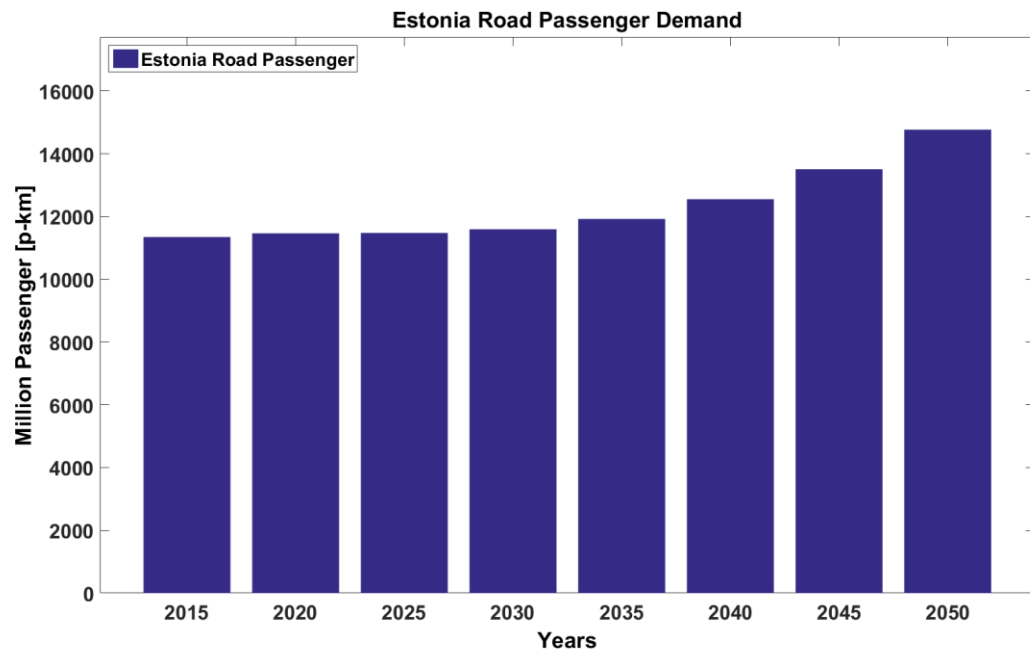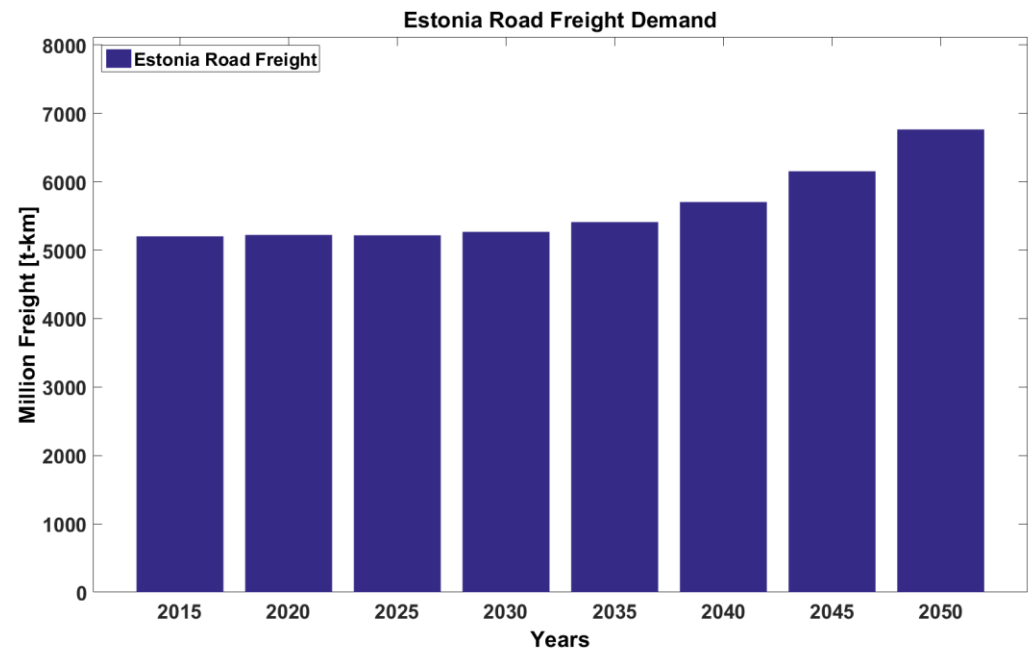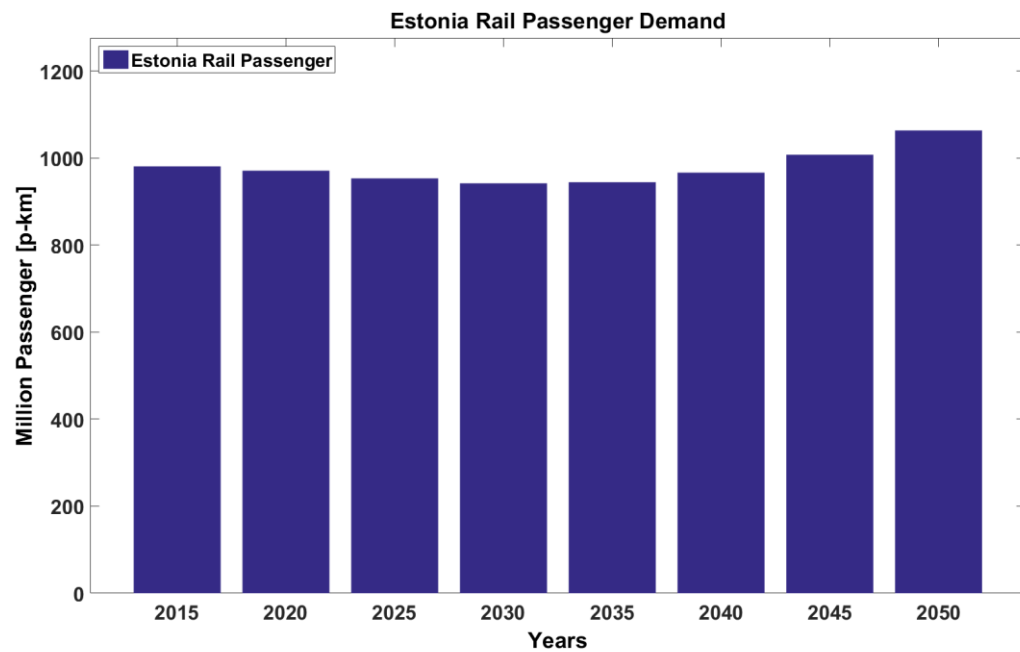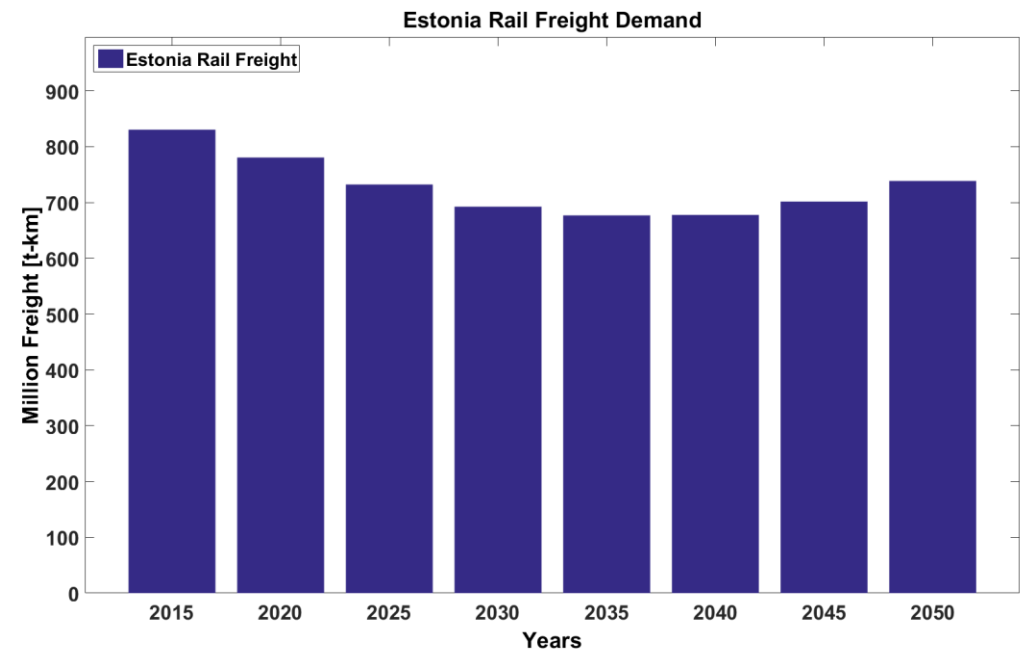

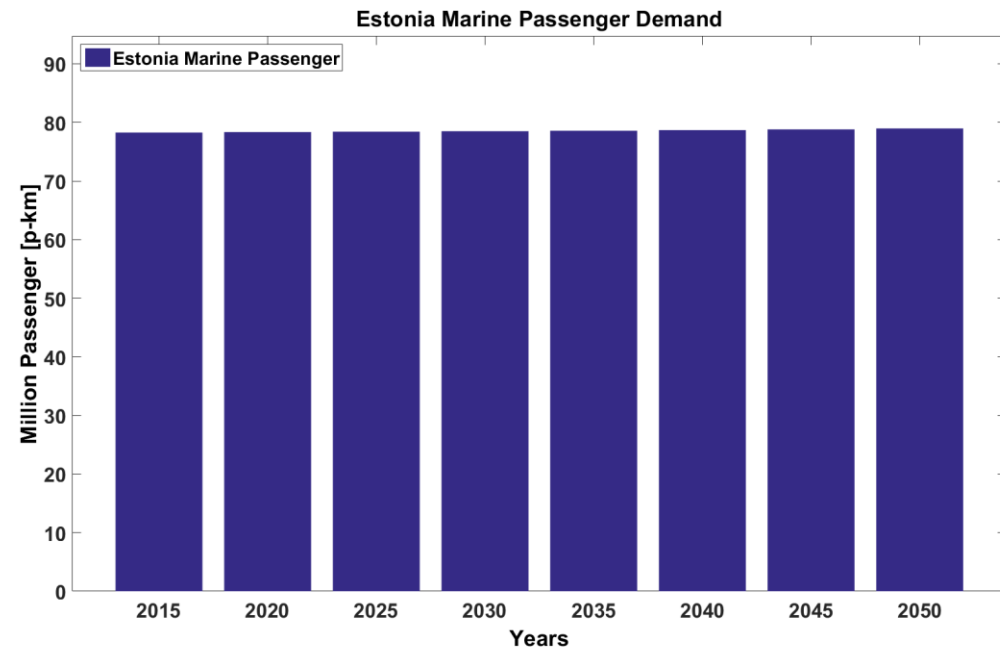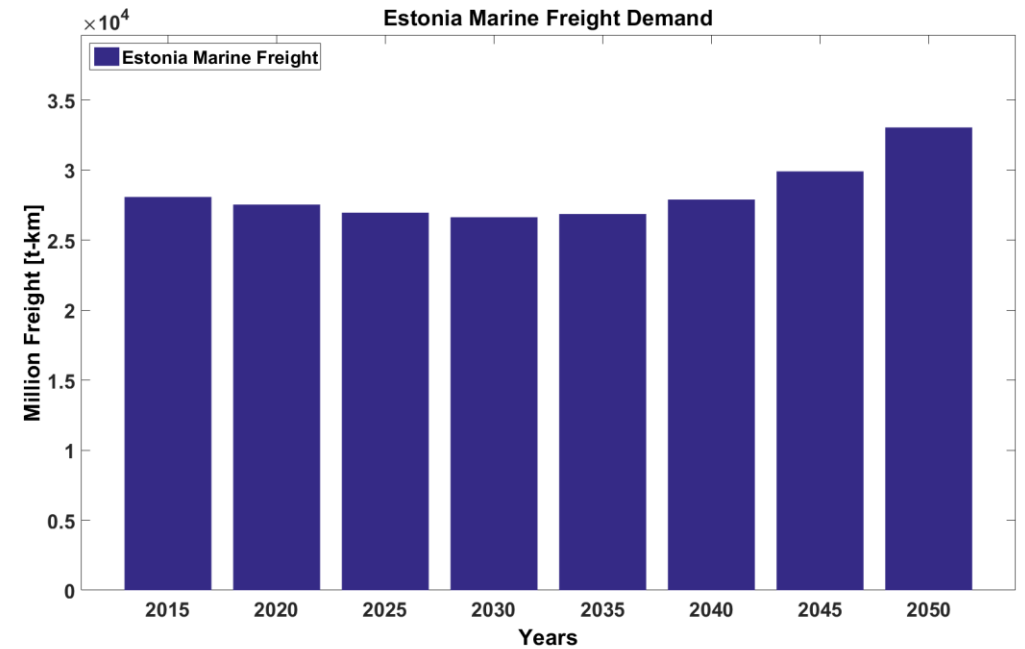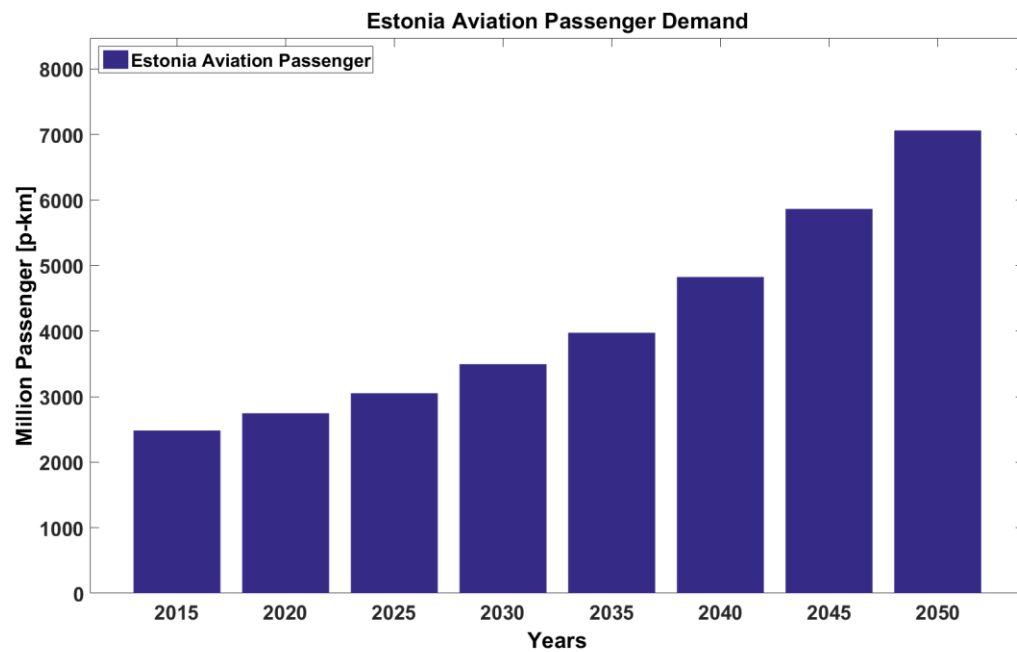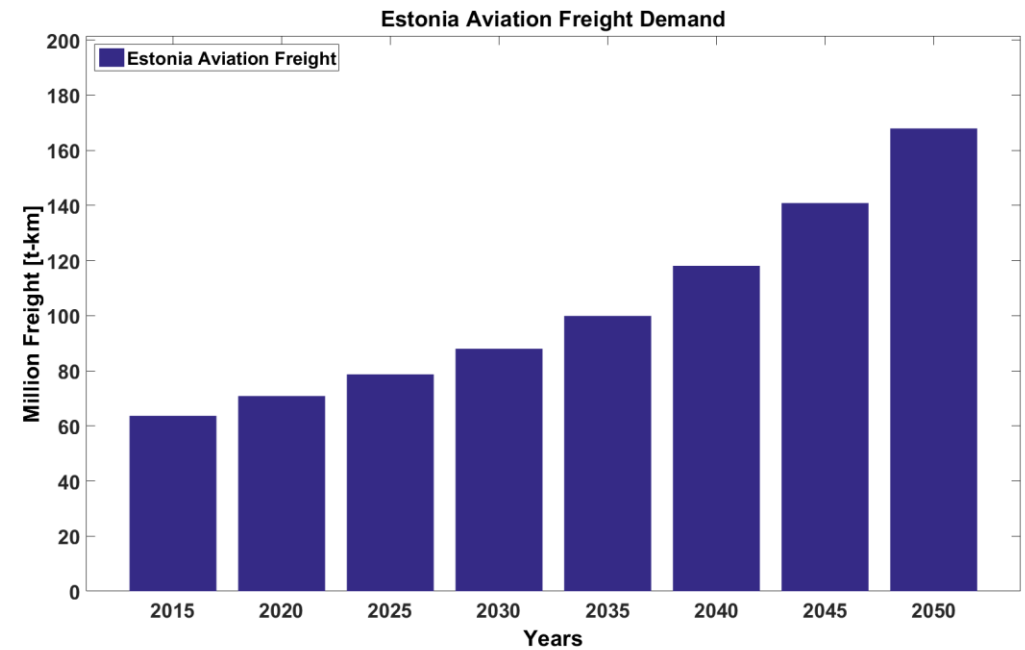

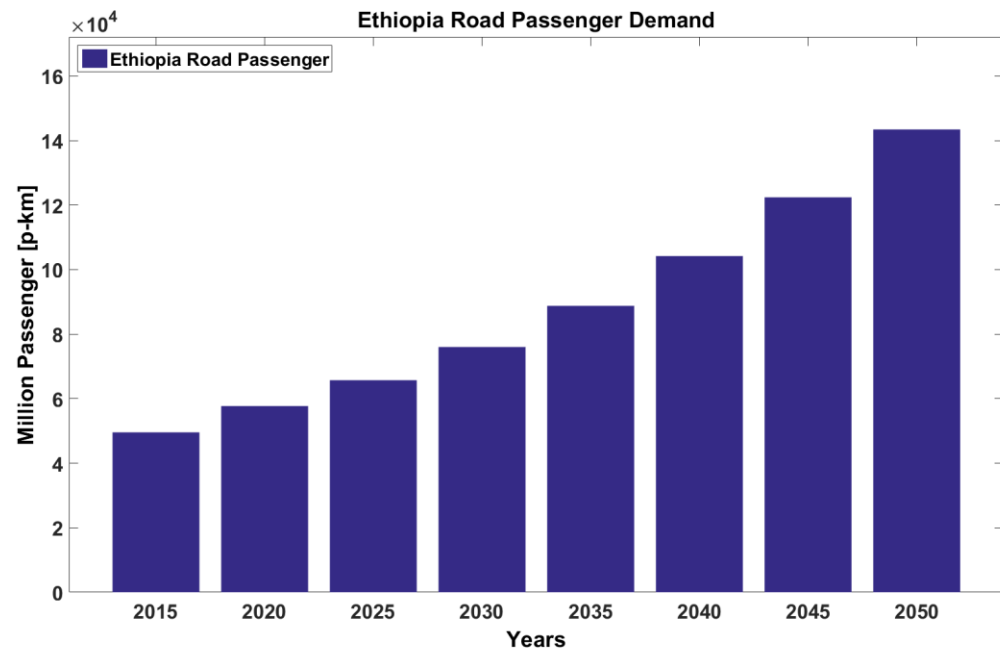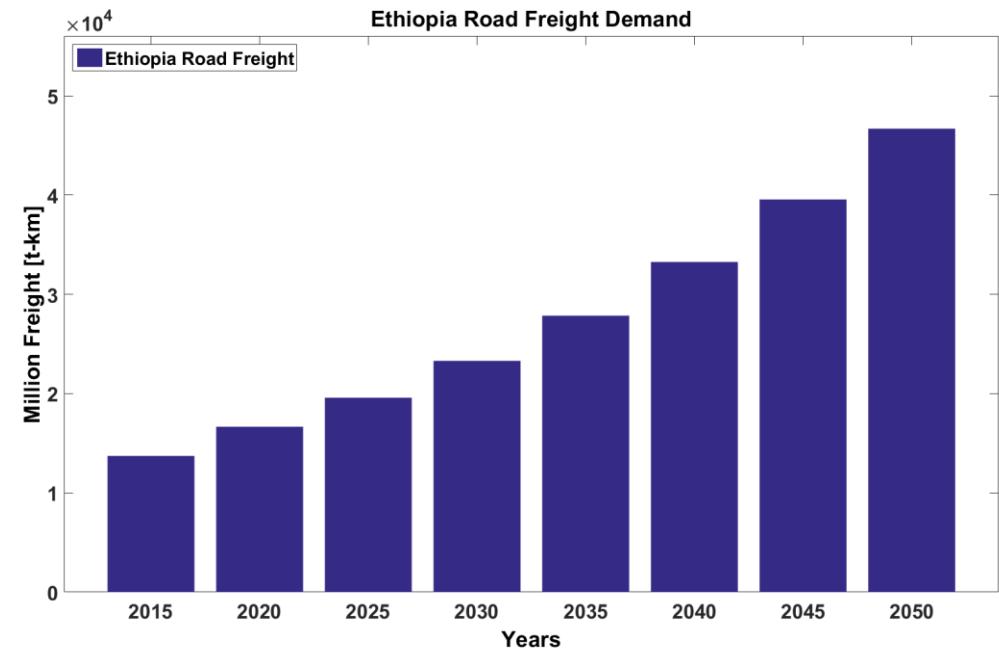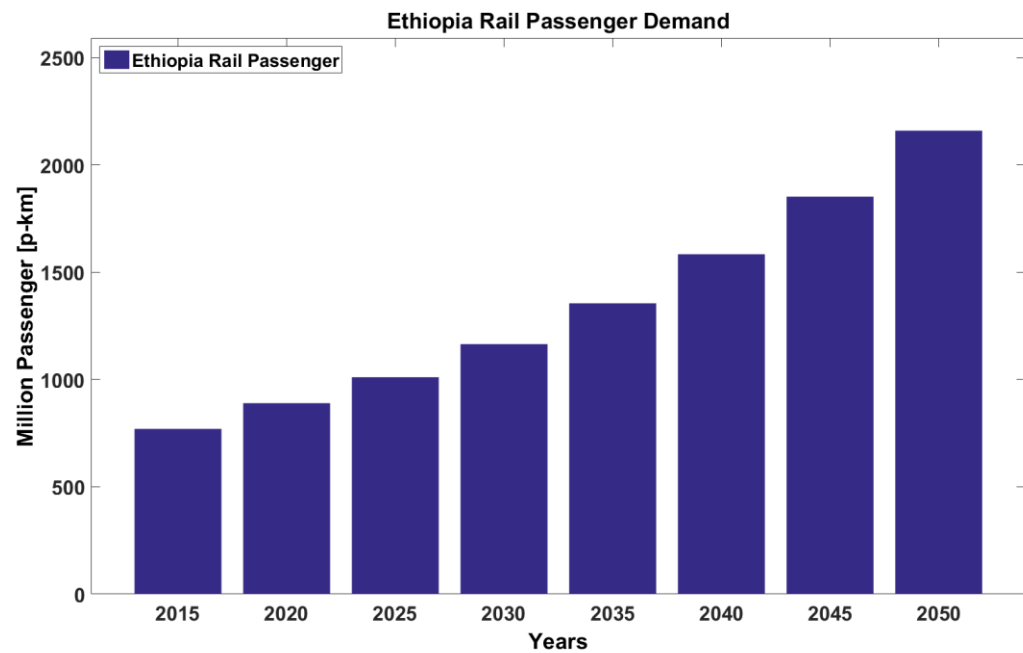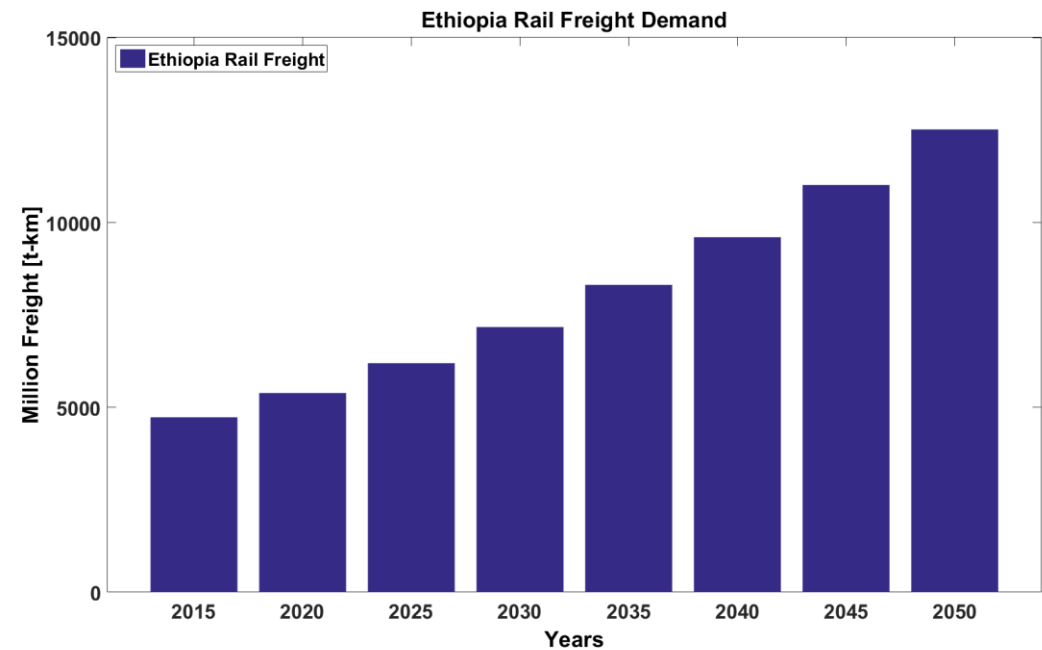

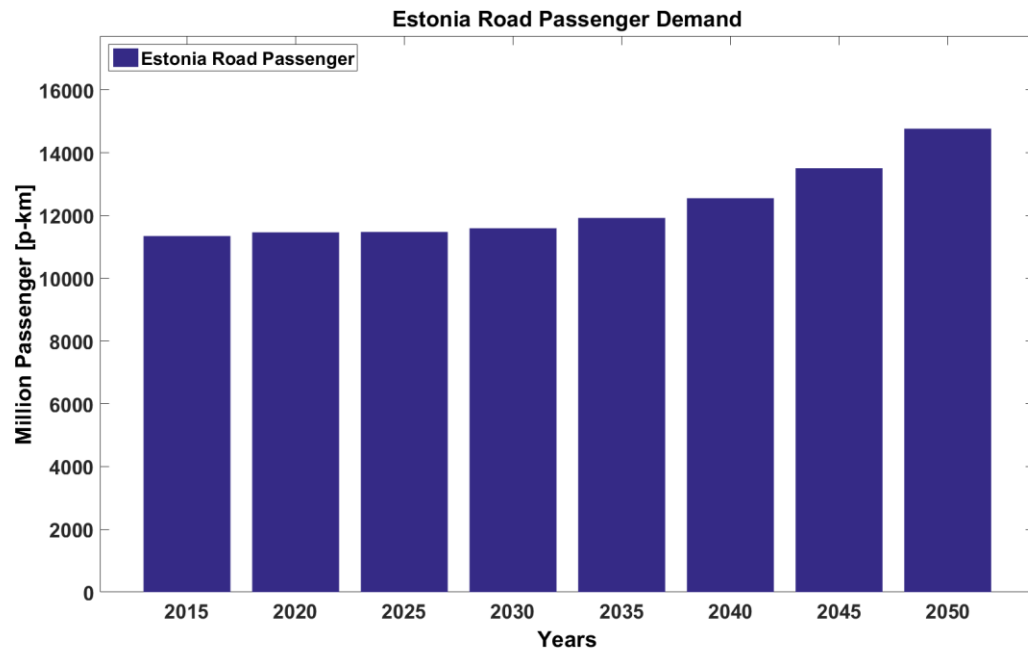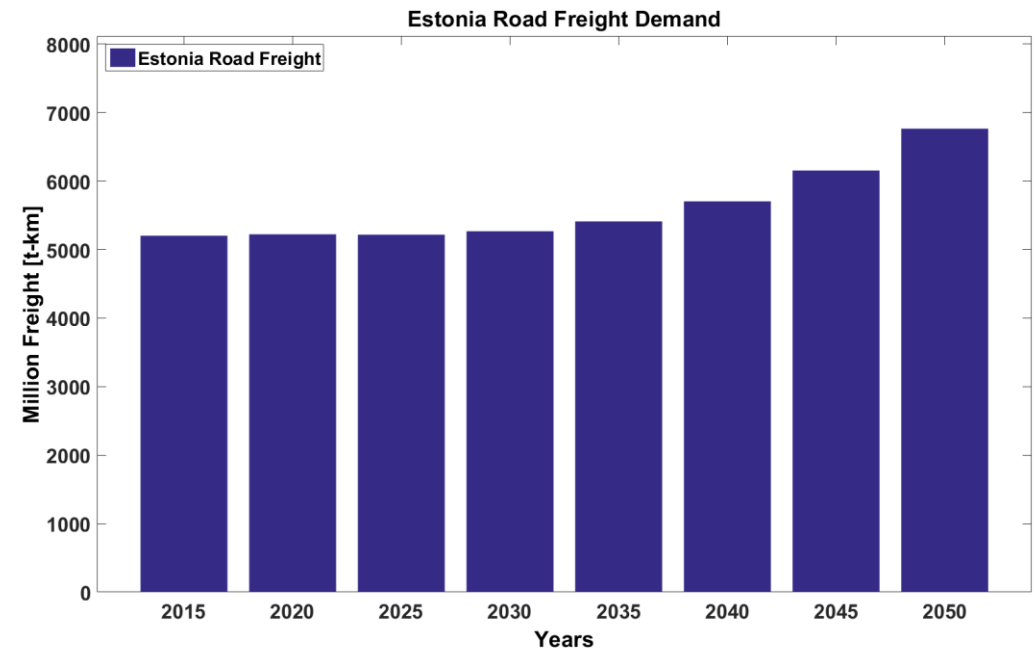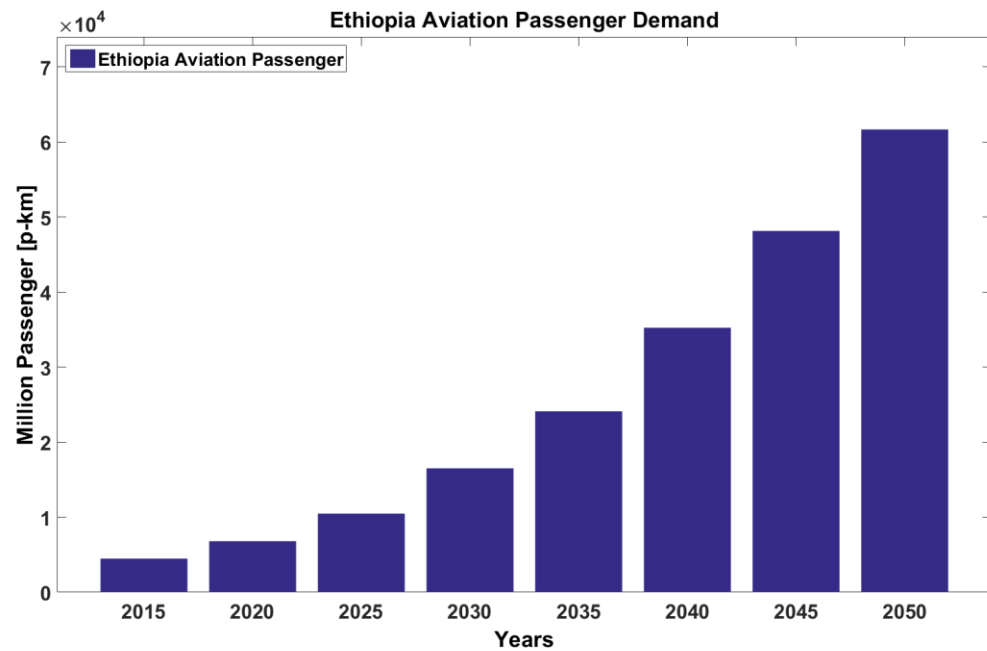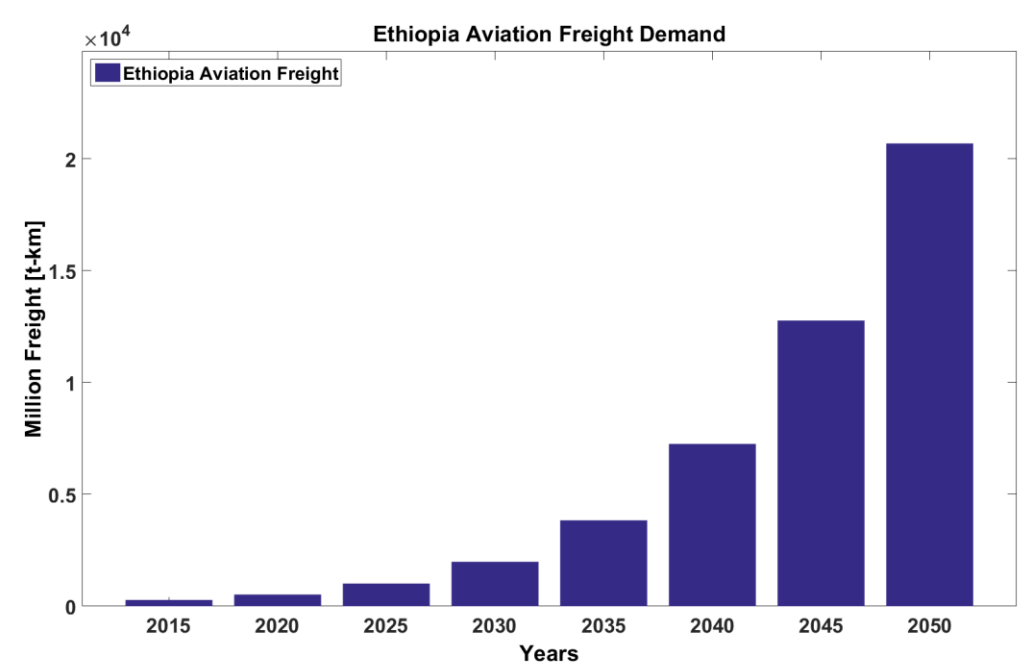

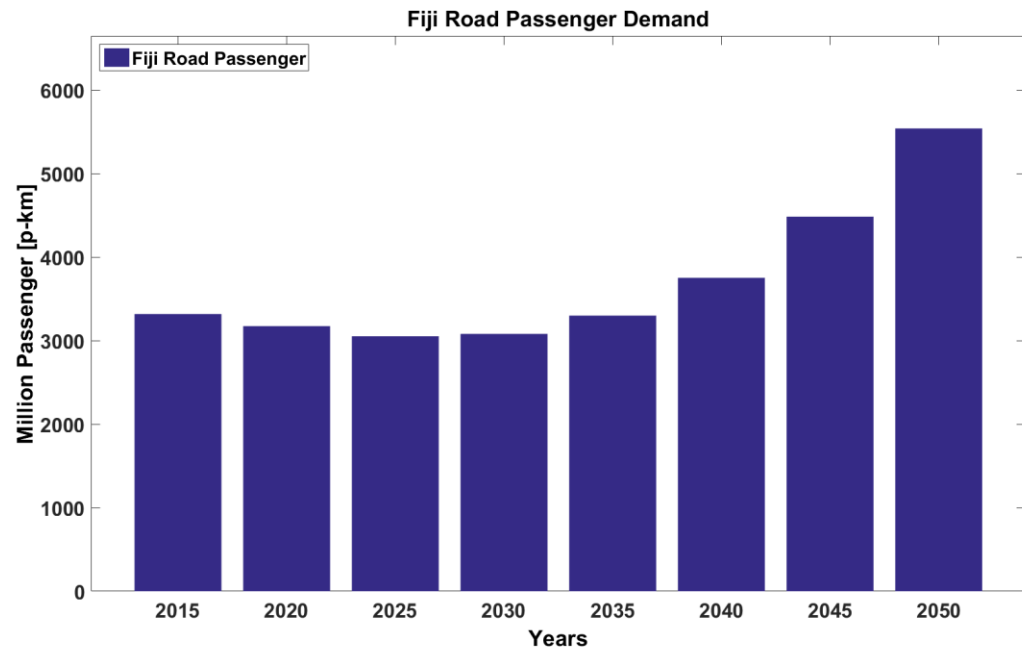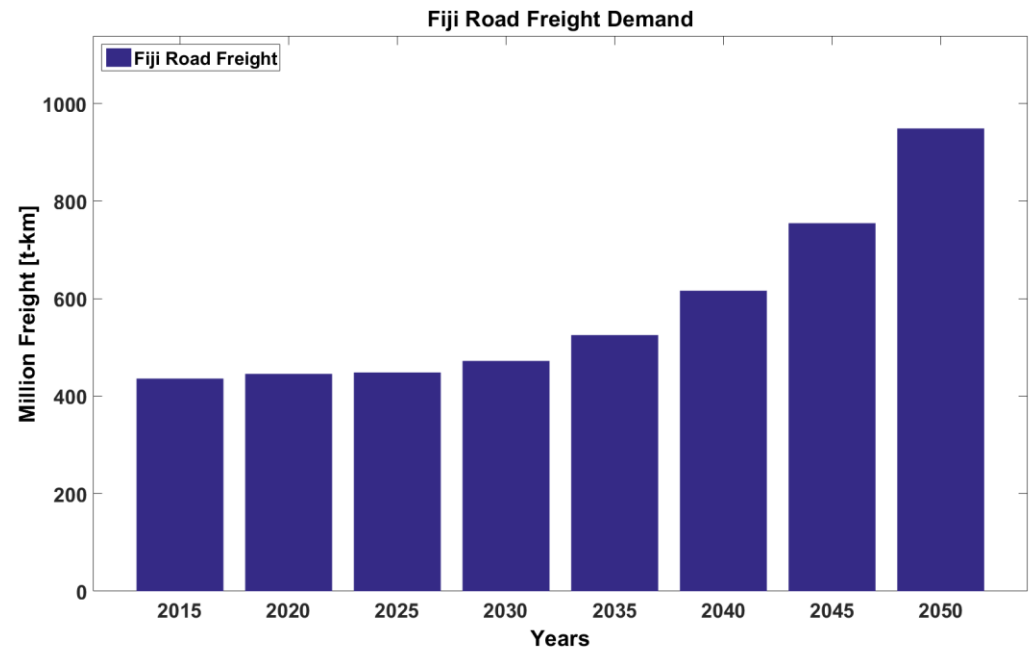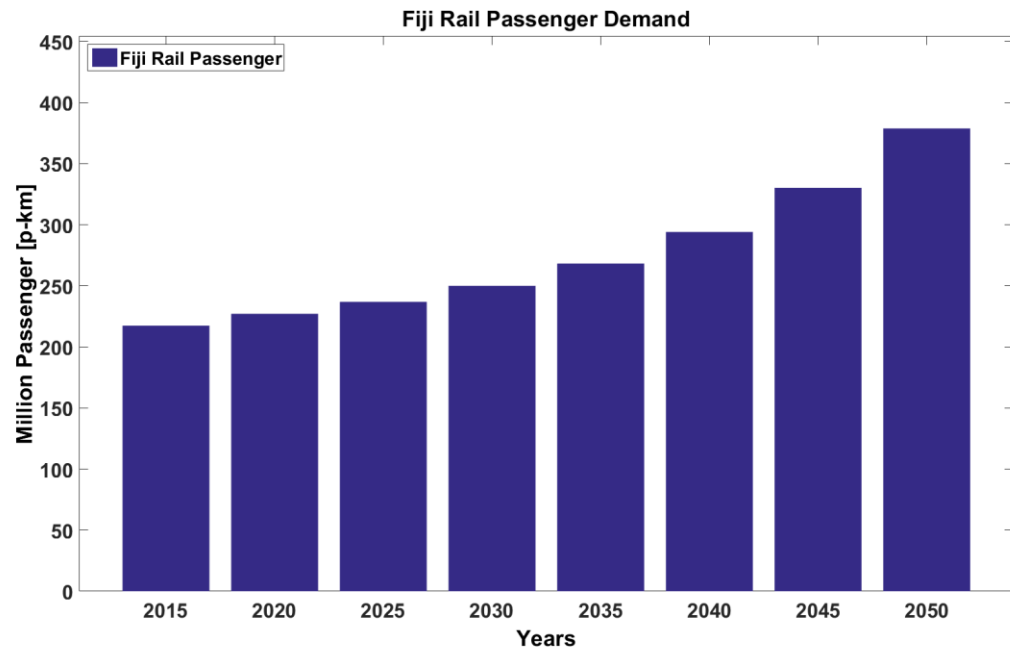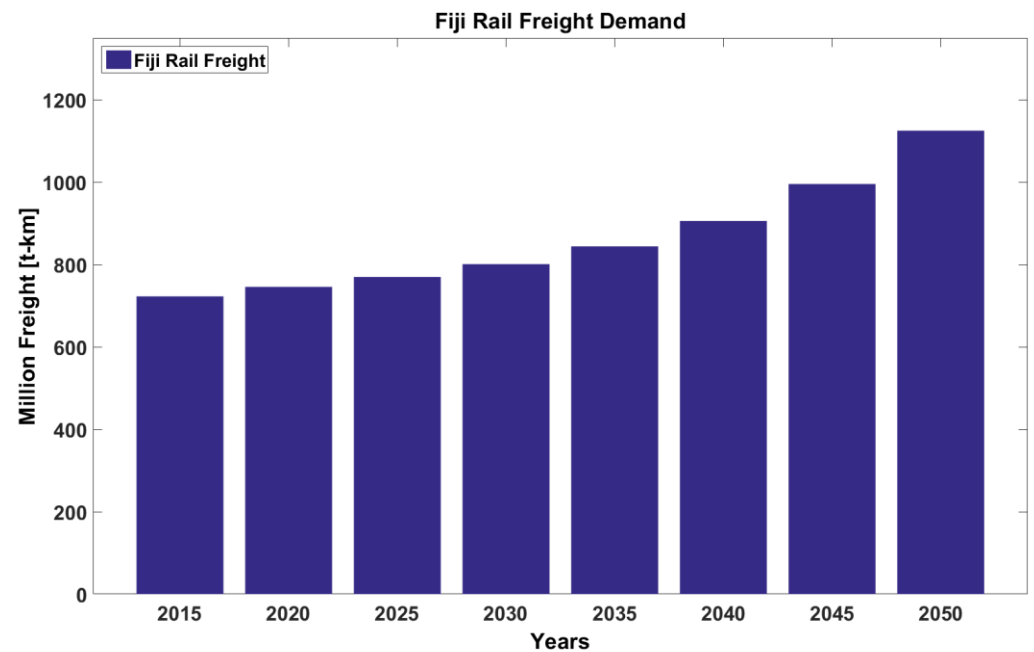

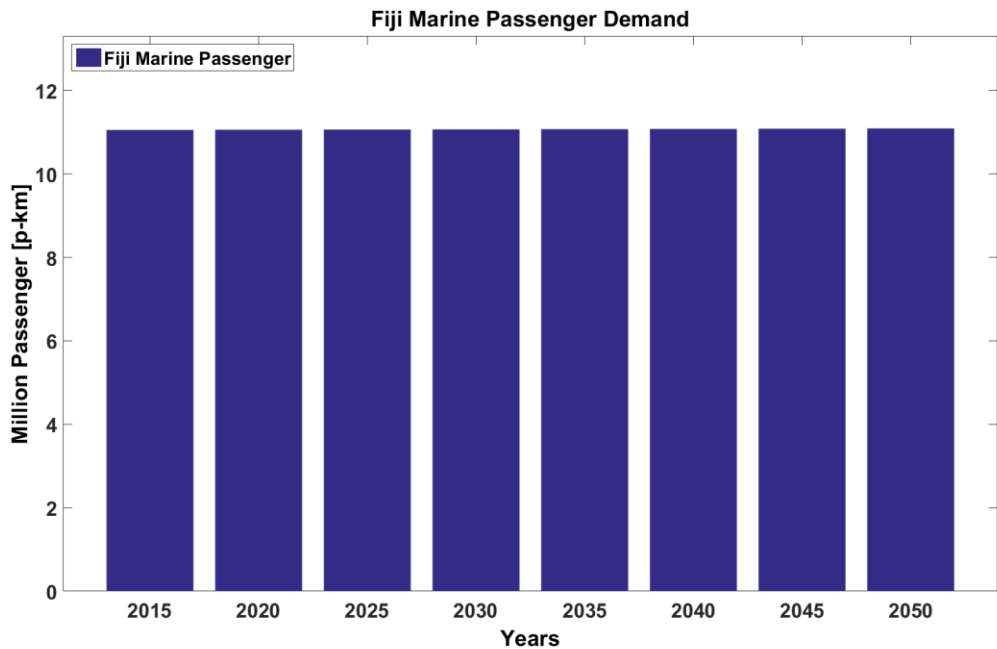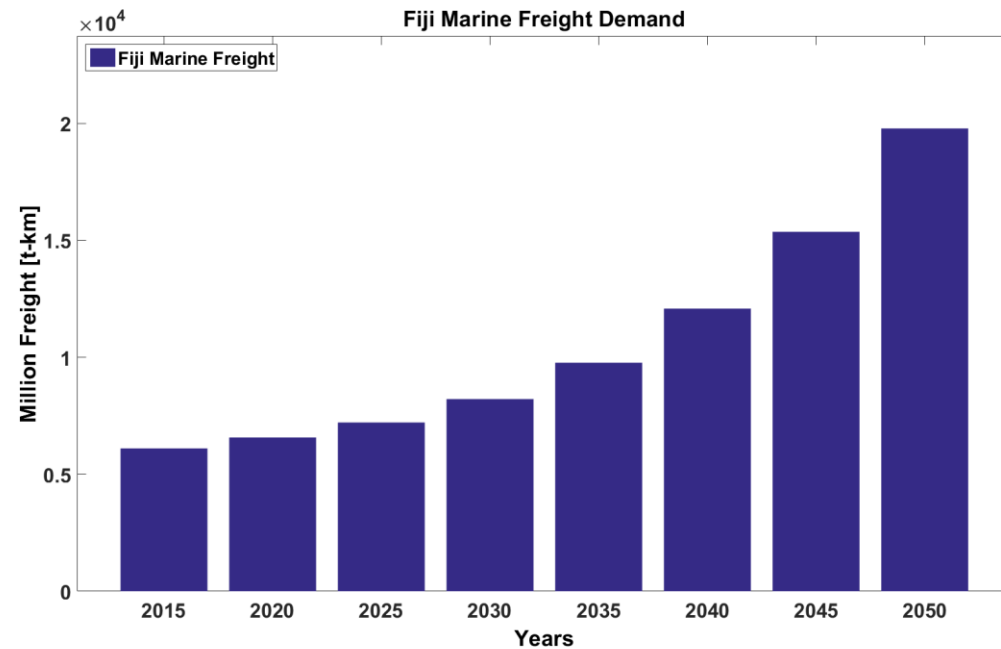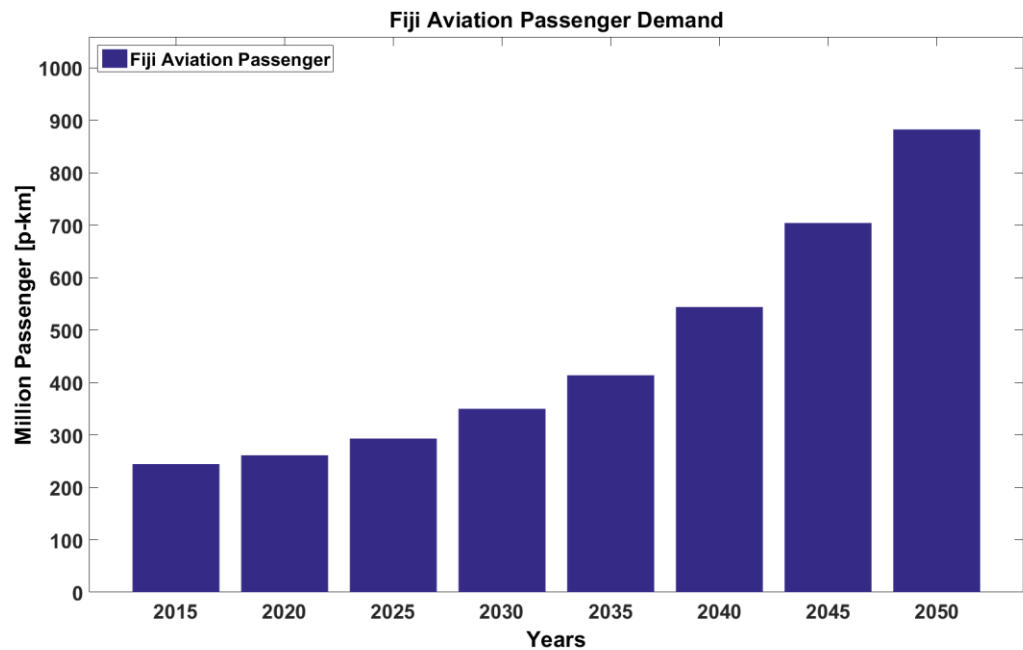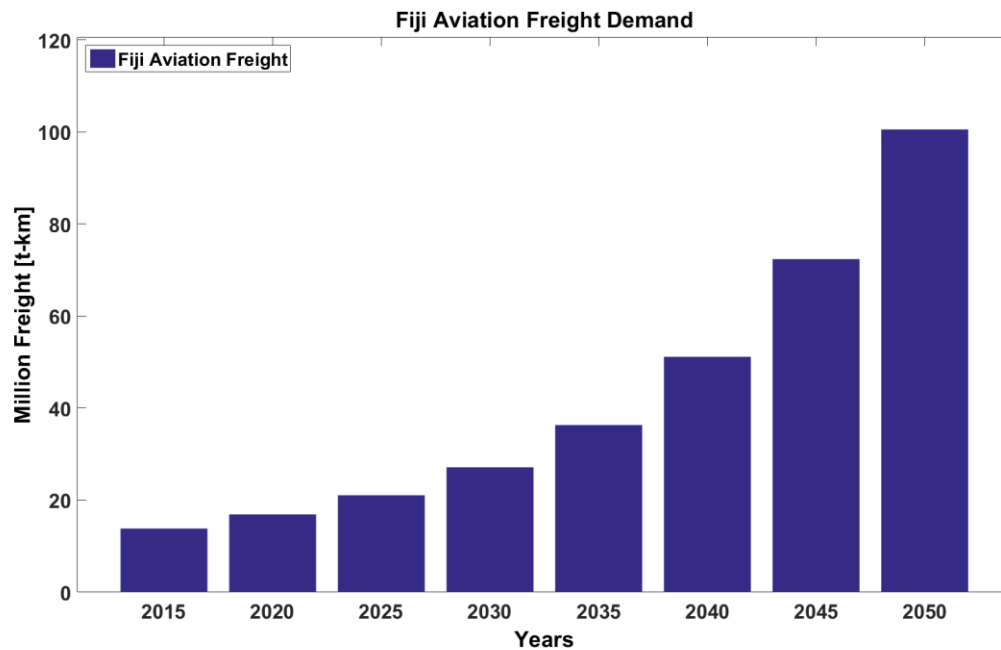

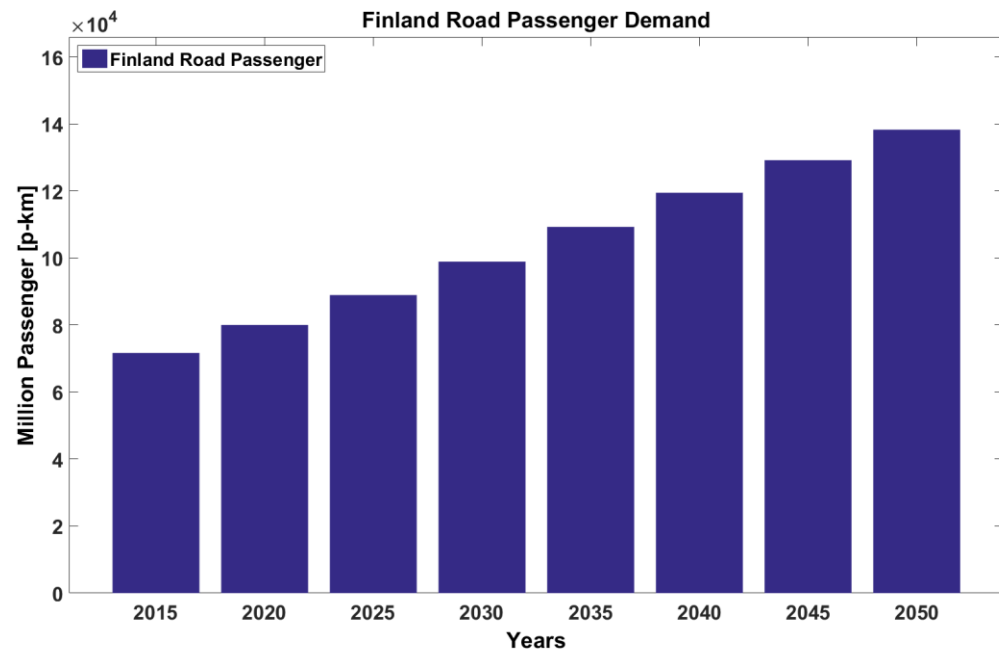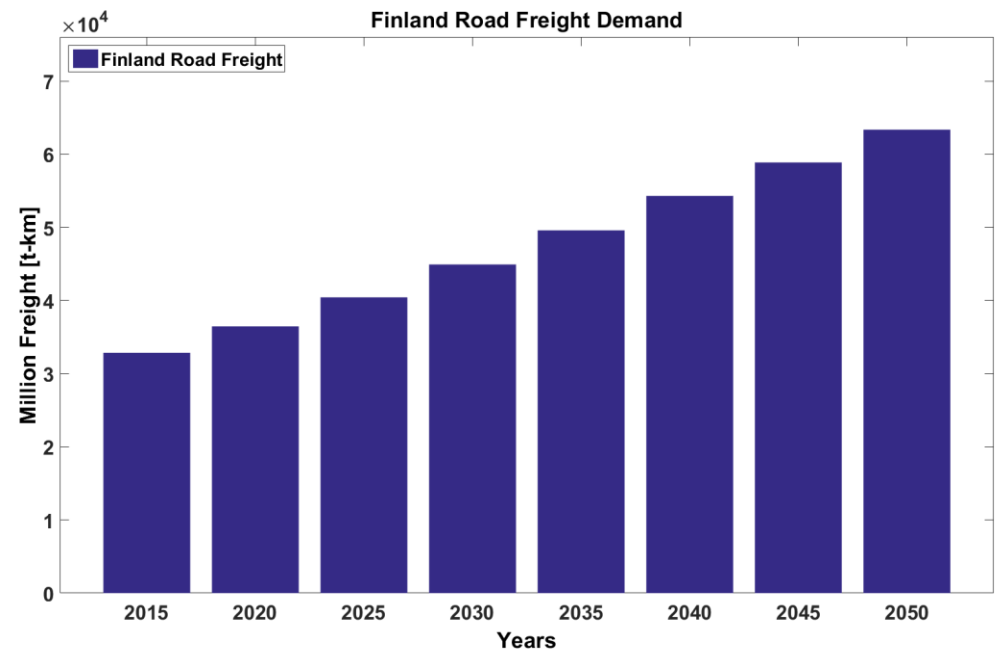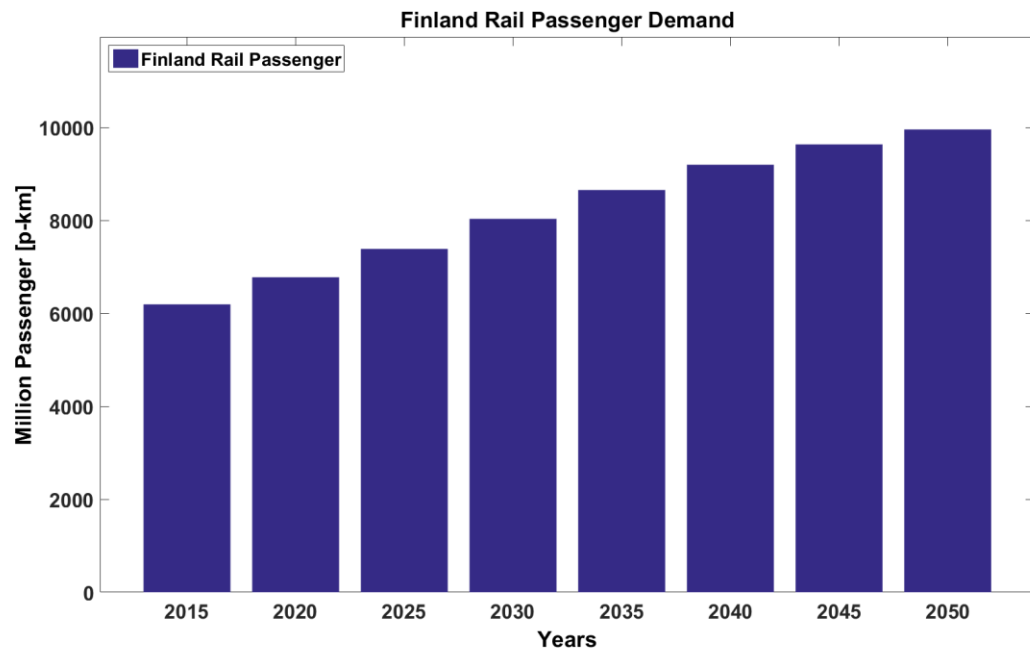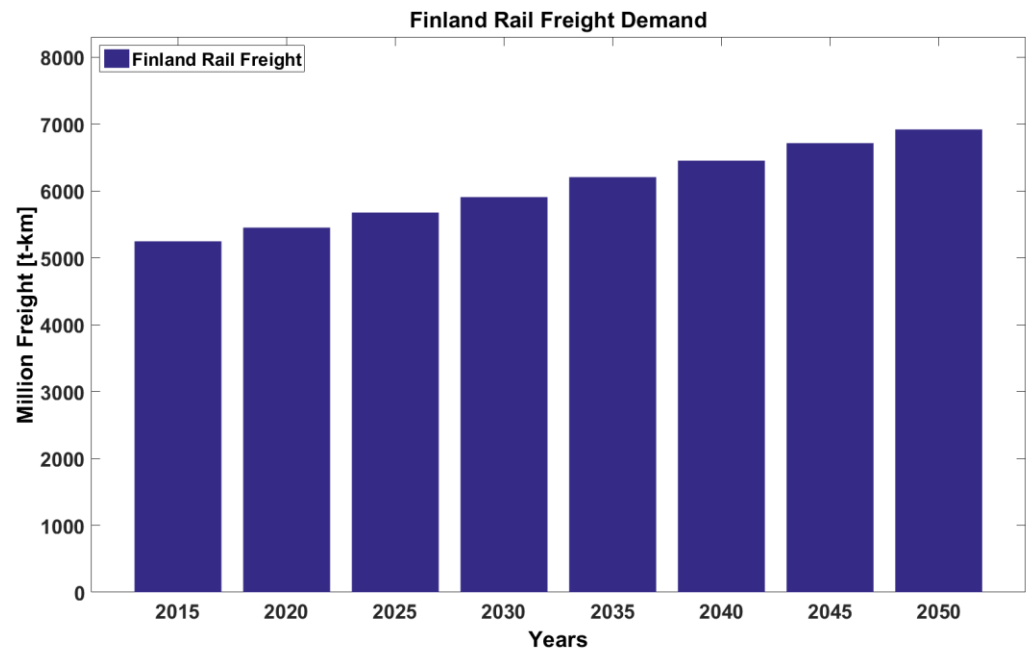

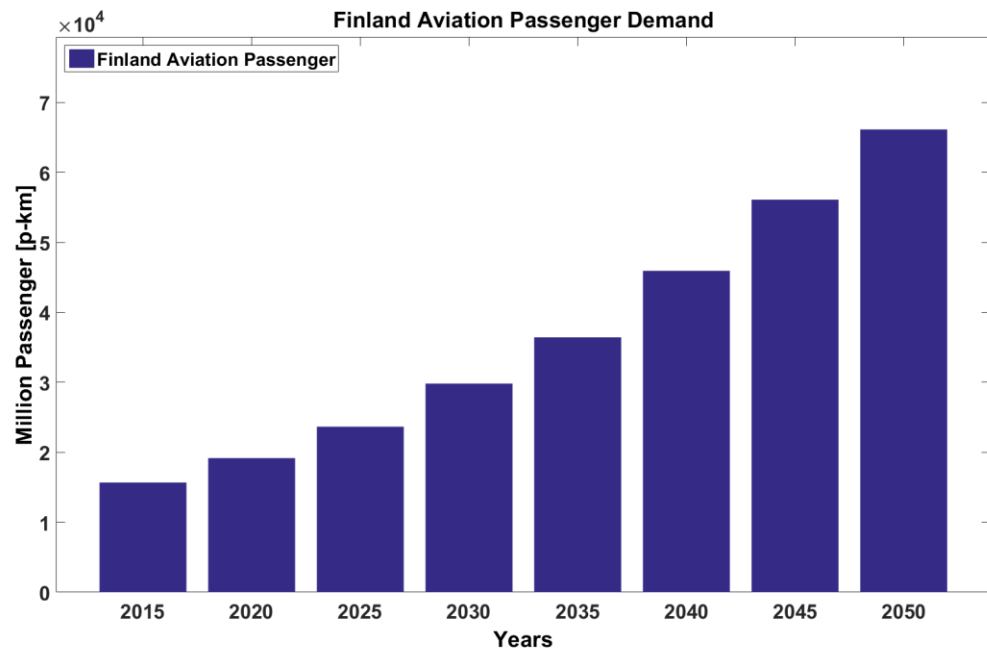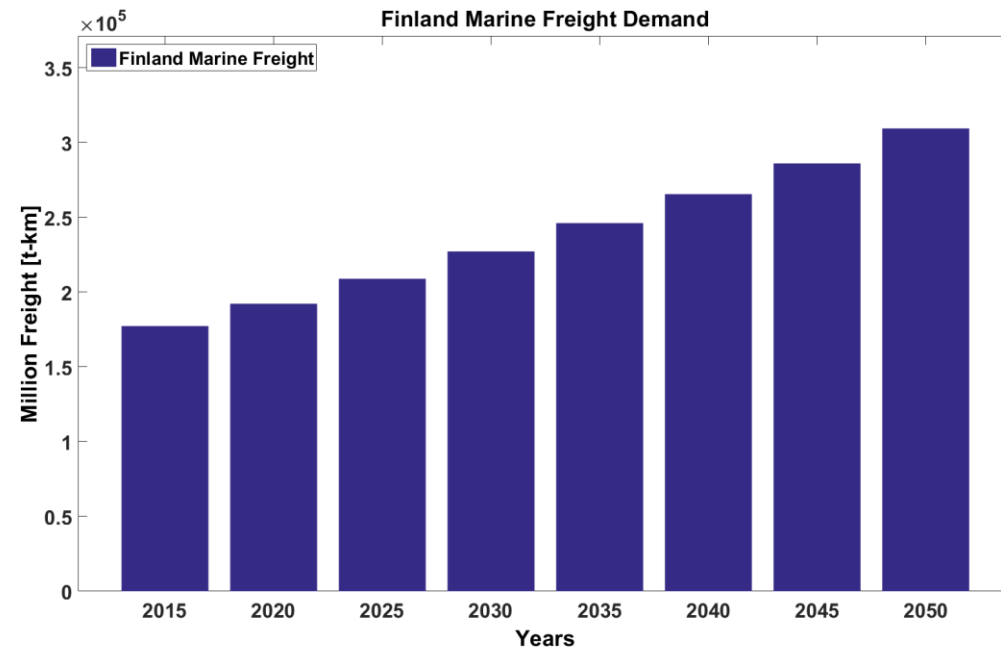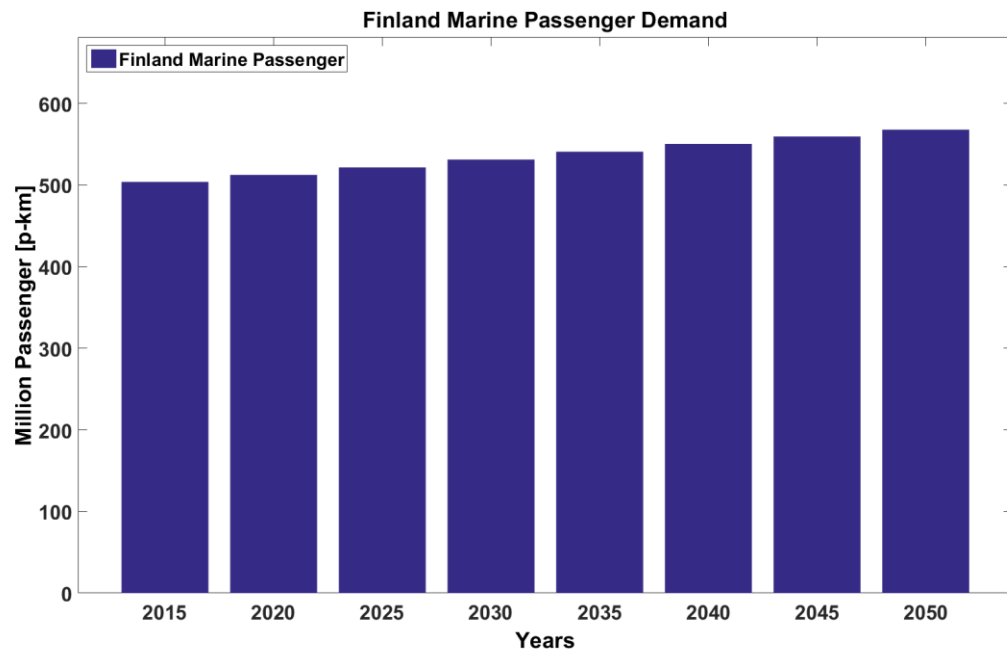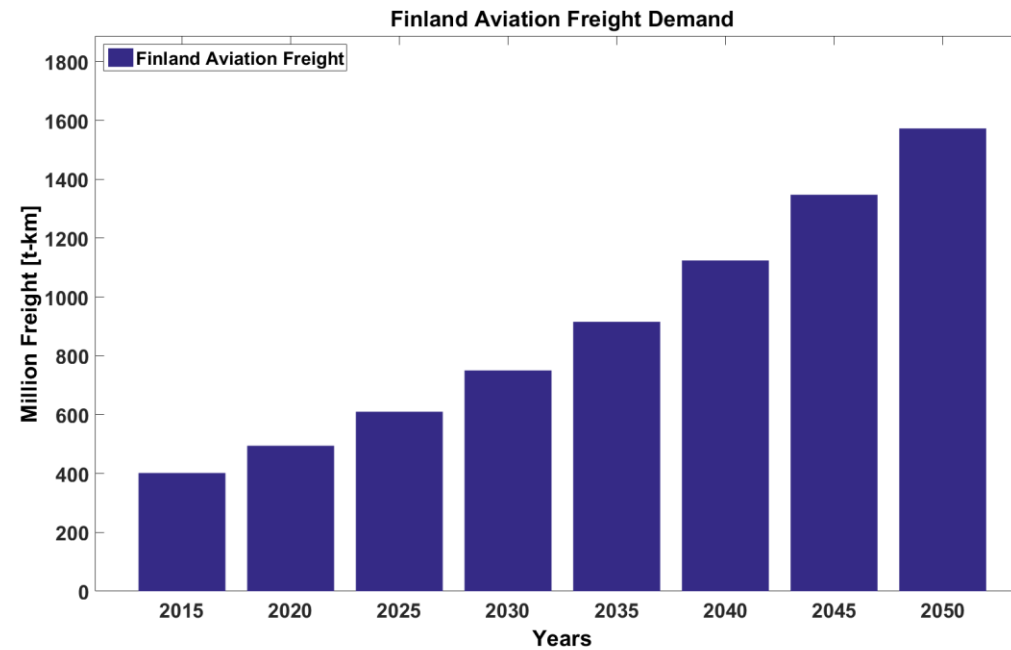

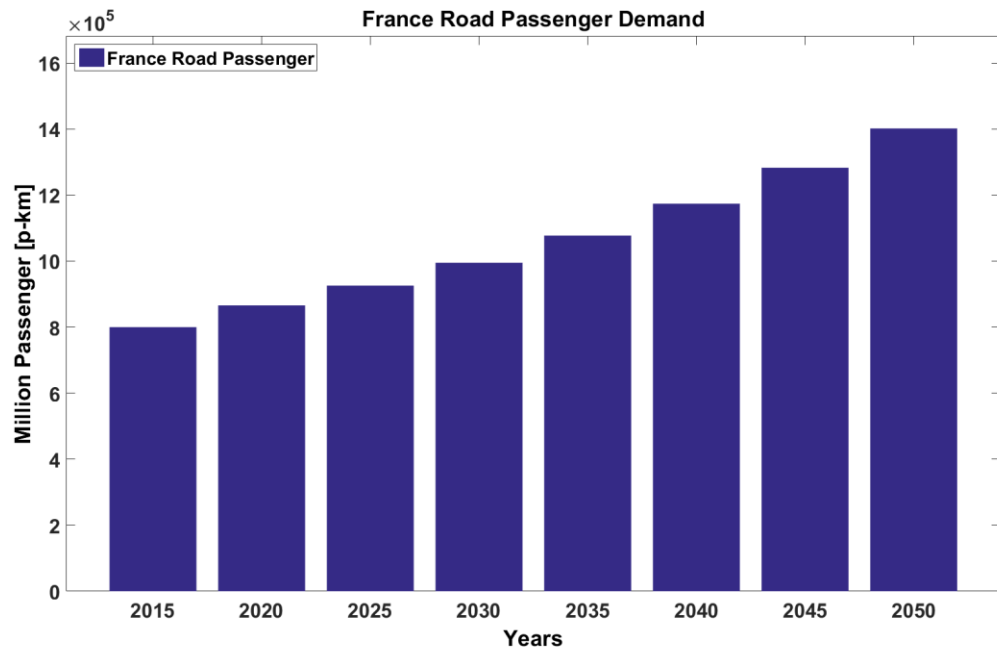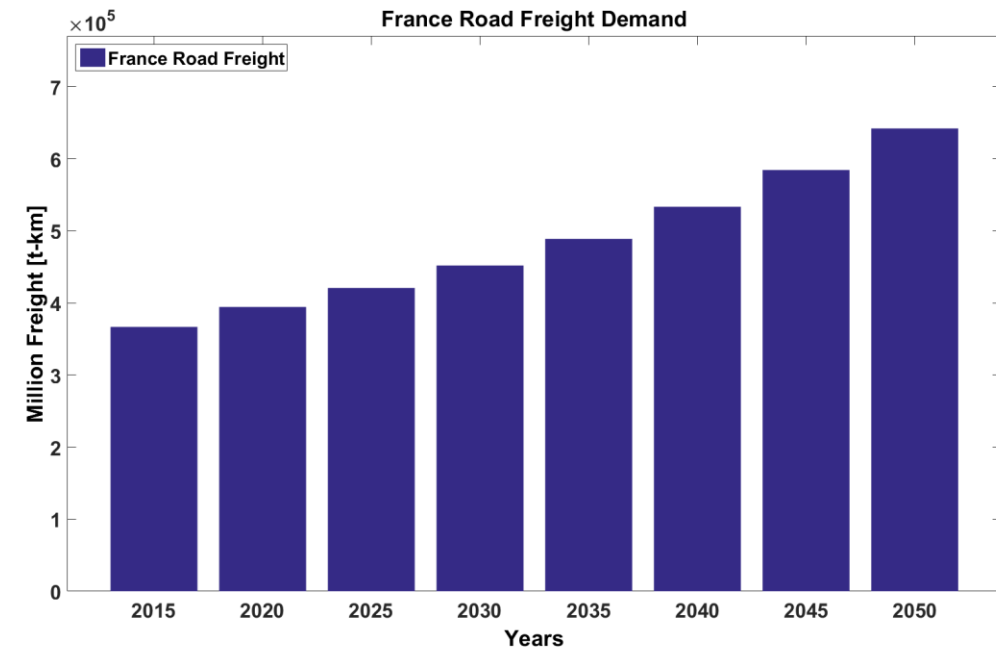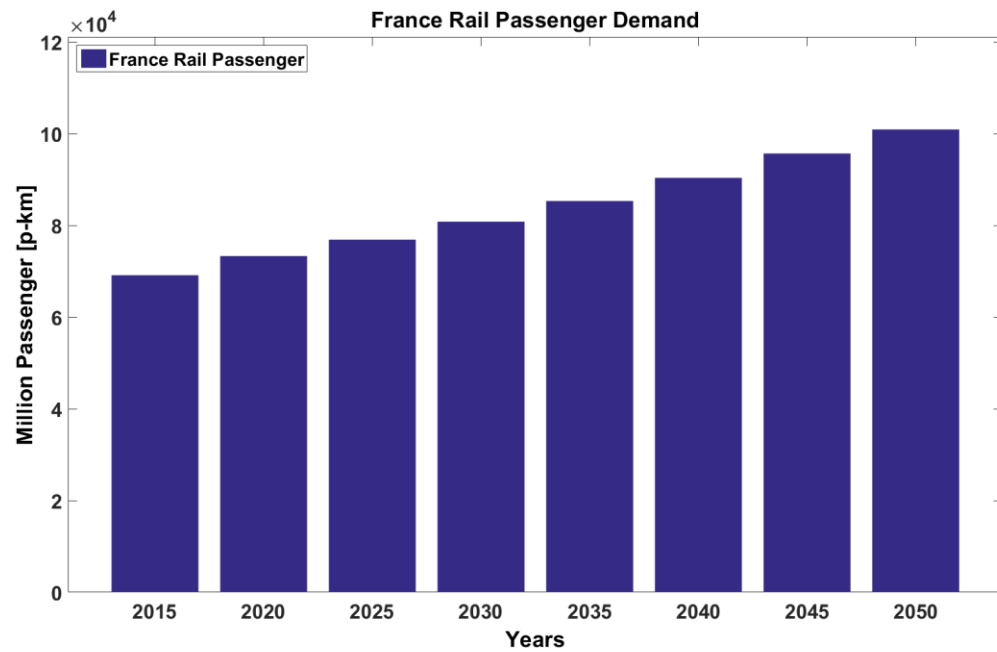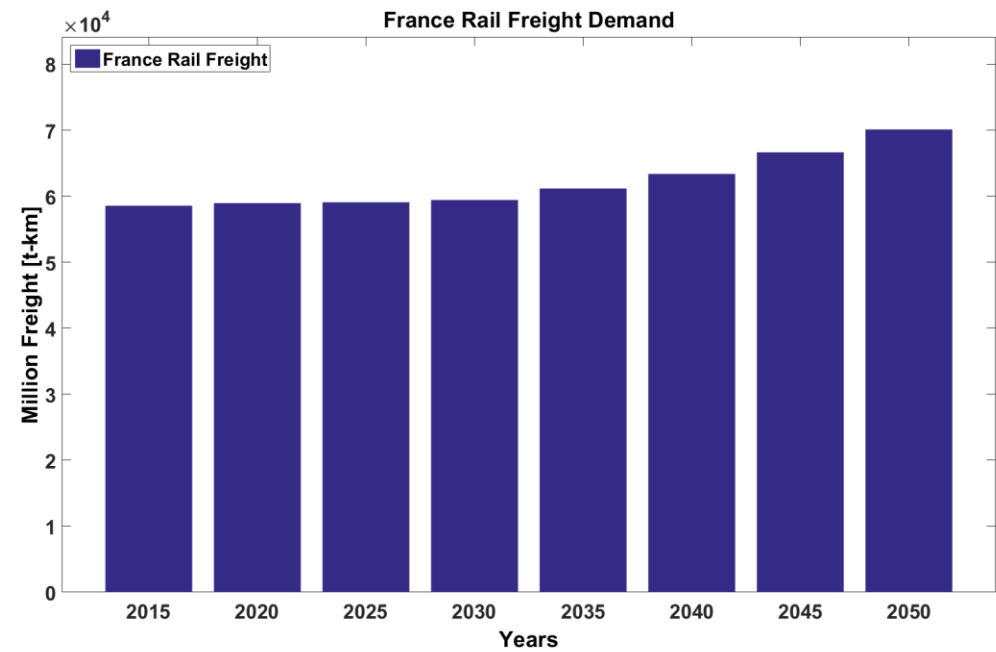

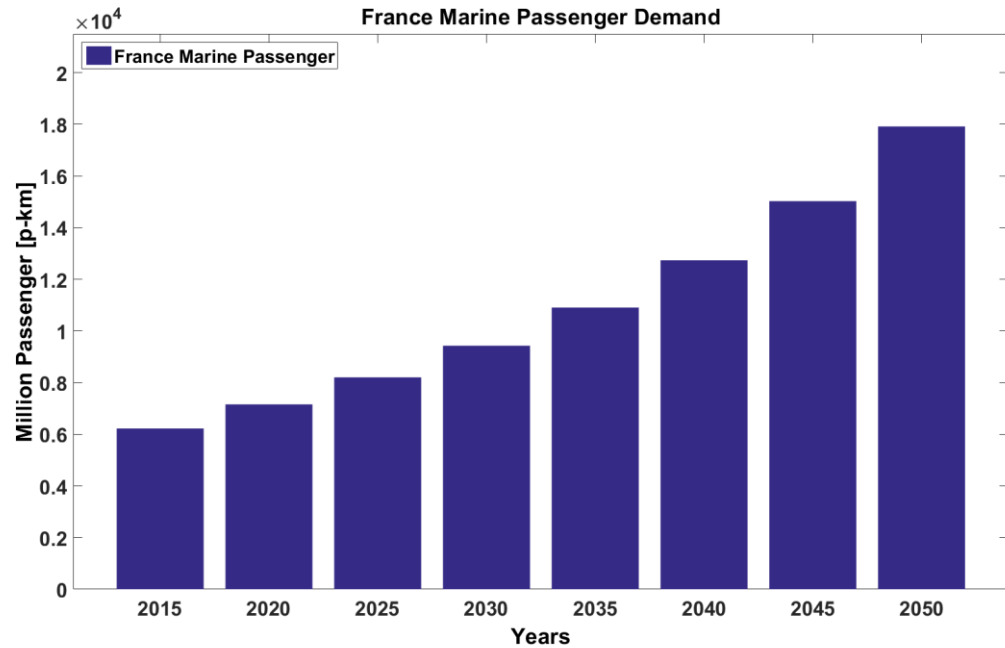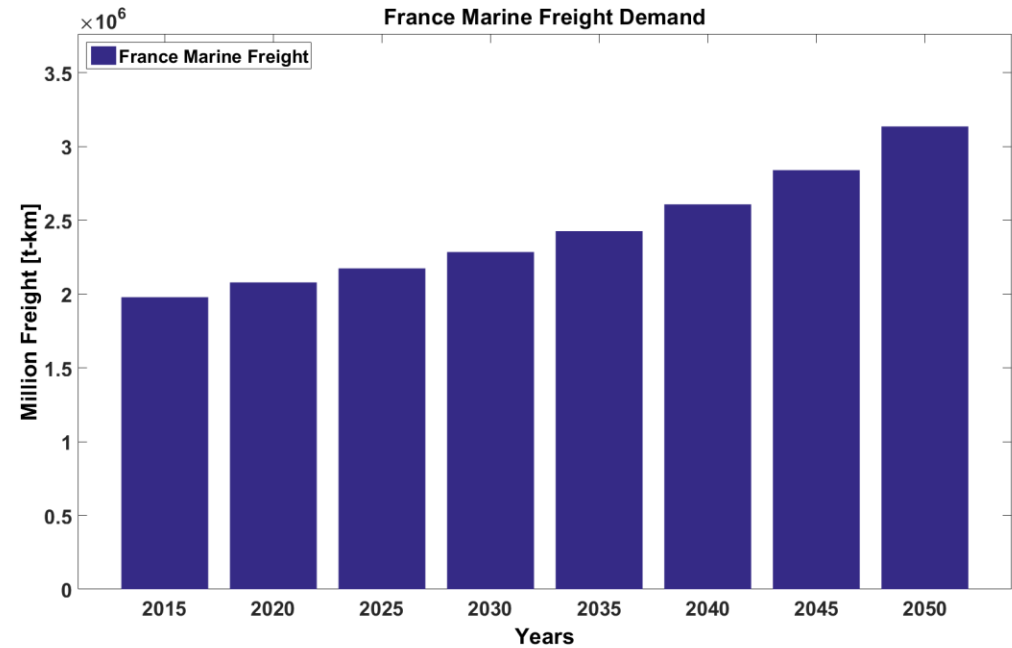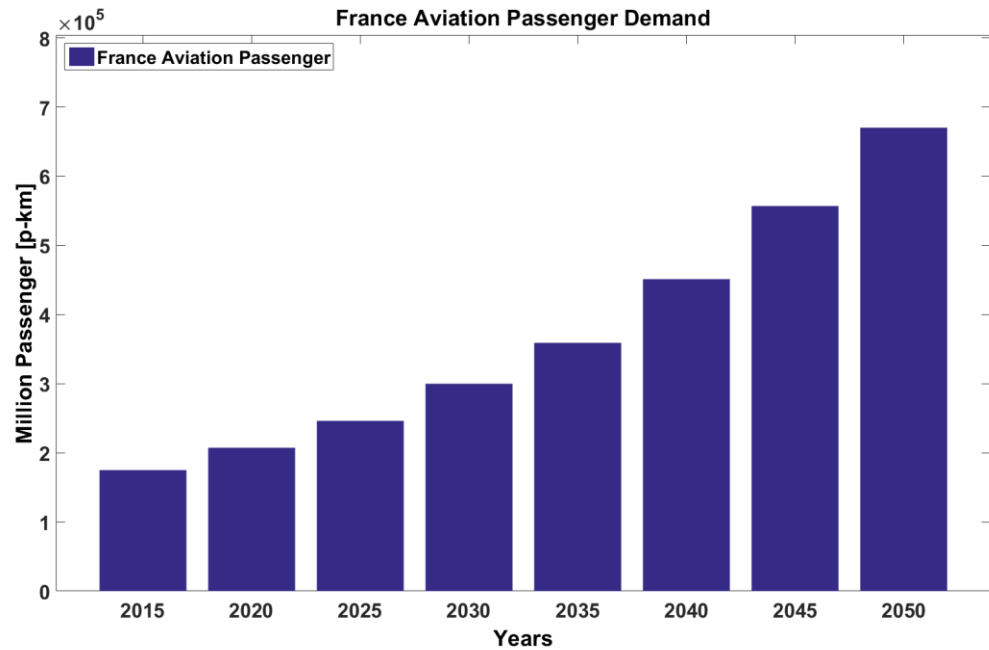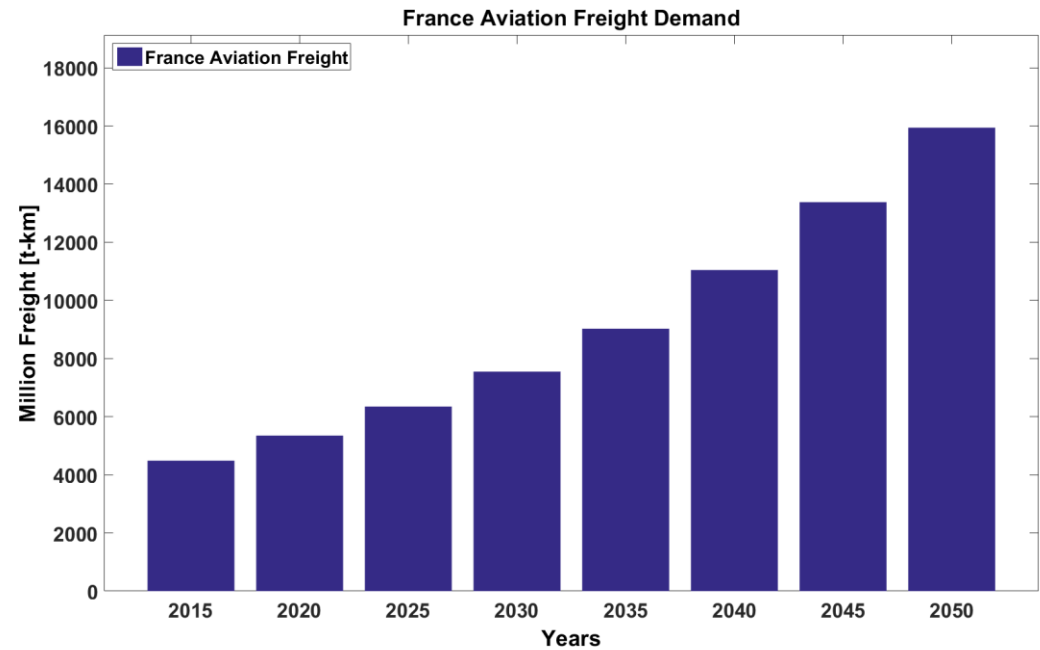

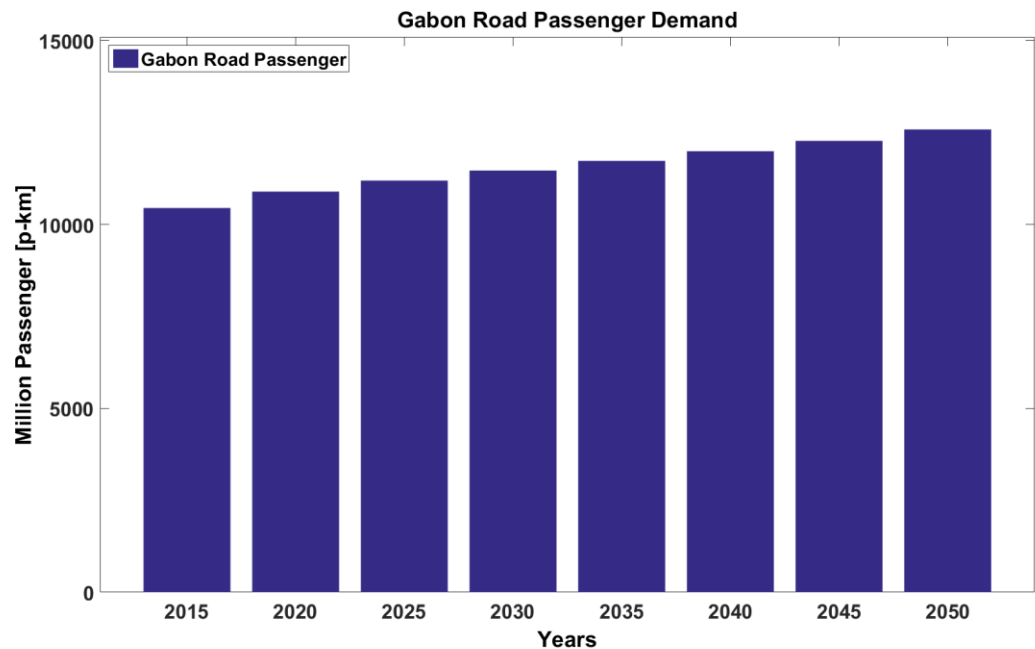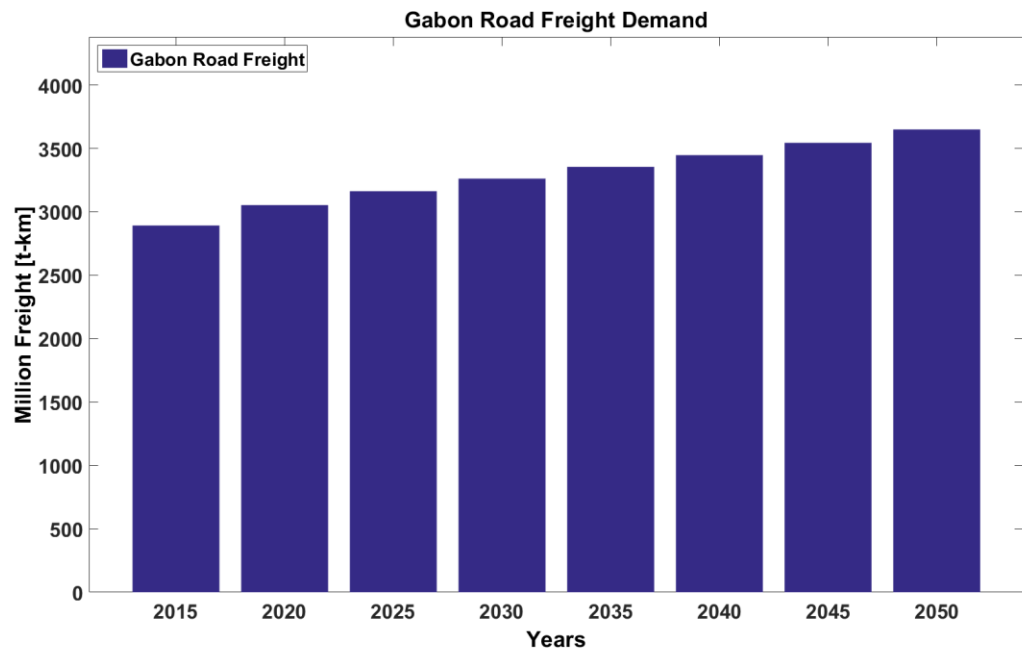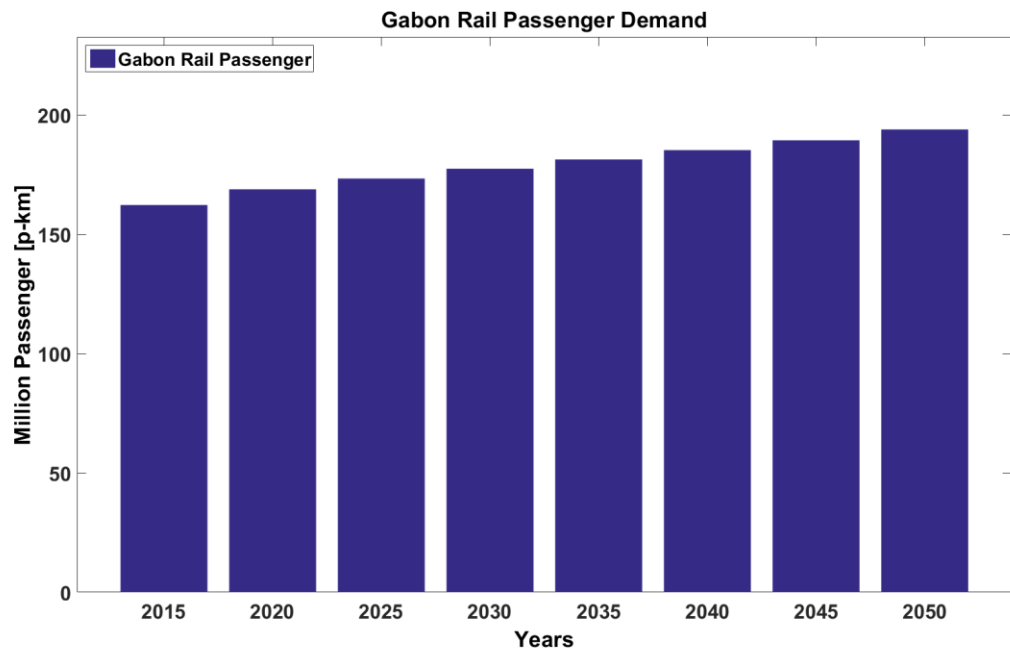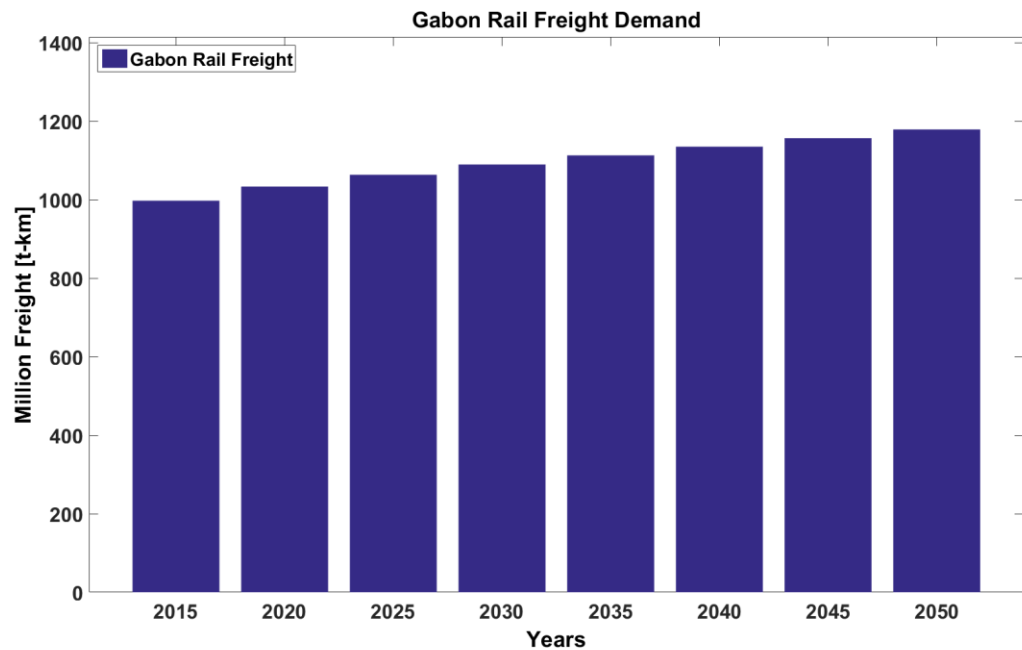

Gabon Marine Passenger Demand

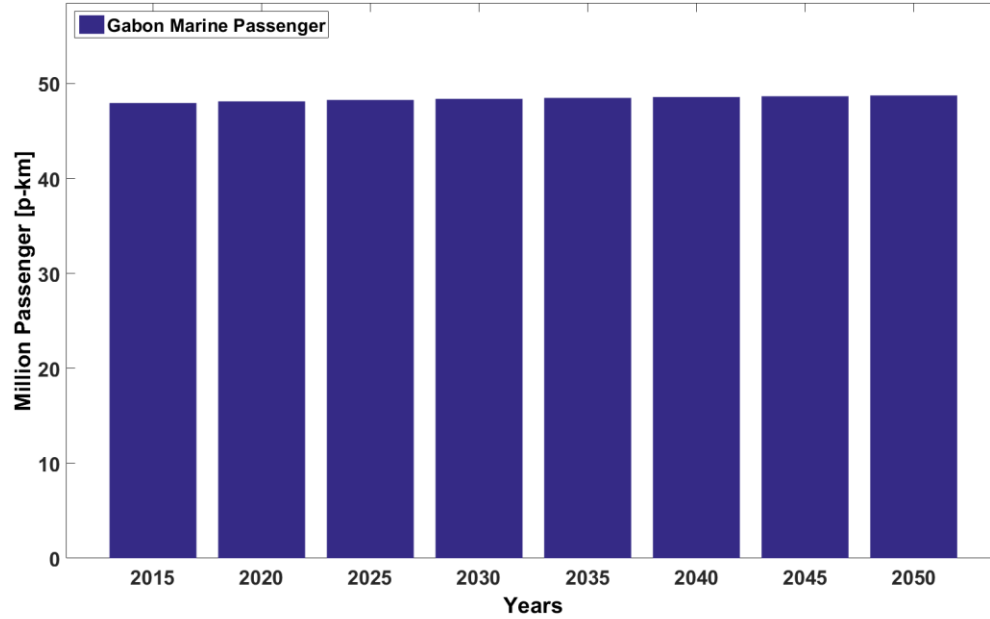

Gabon Marine Freight Demand

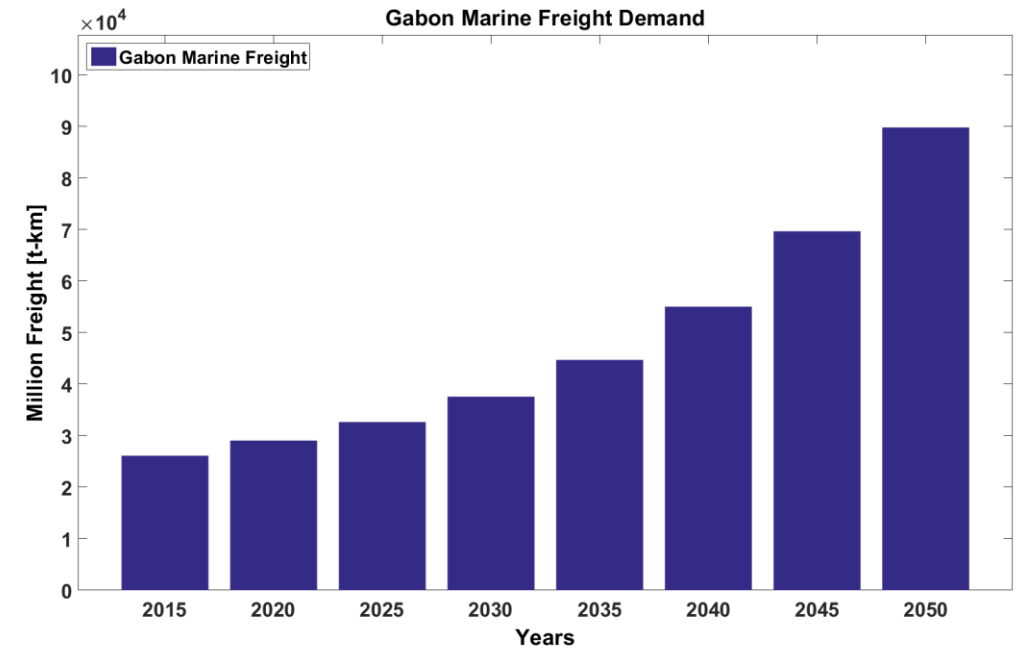

Gabon Aviation Passenger Demand

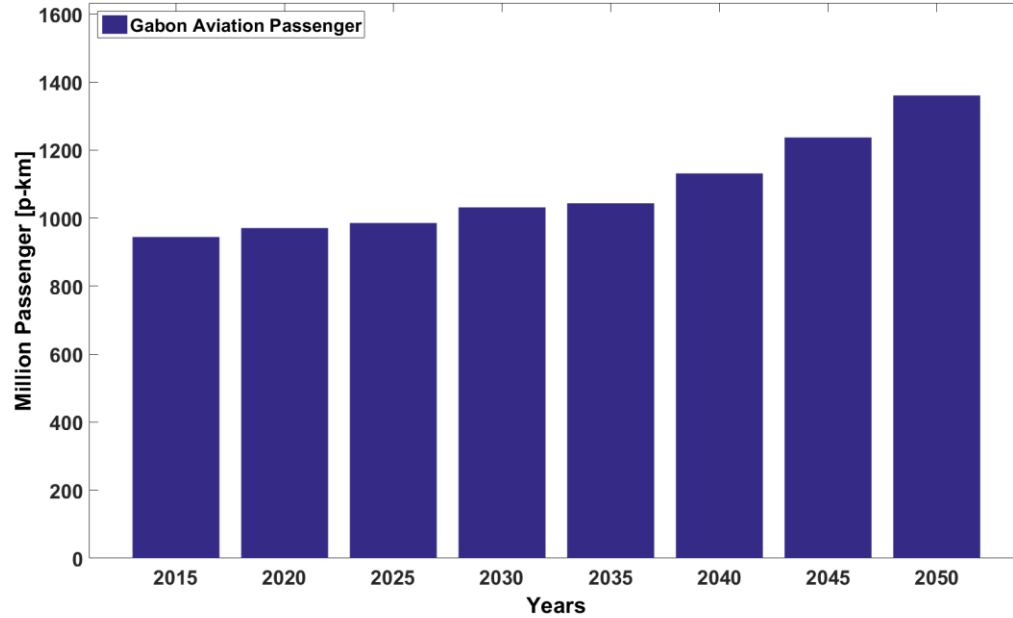

Gabon Aviation Freight Demand

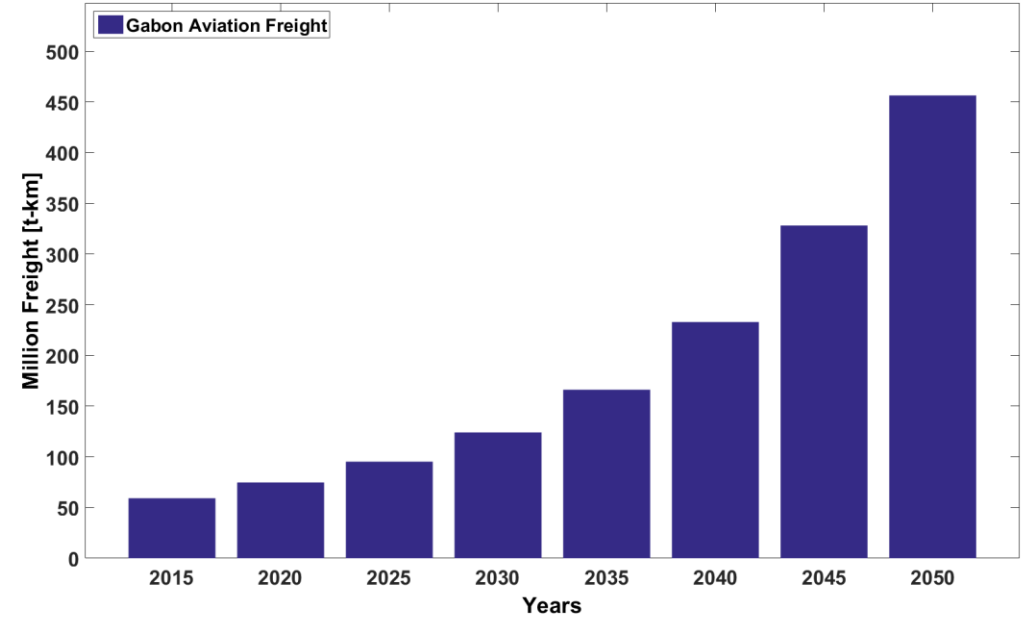

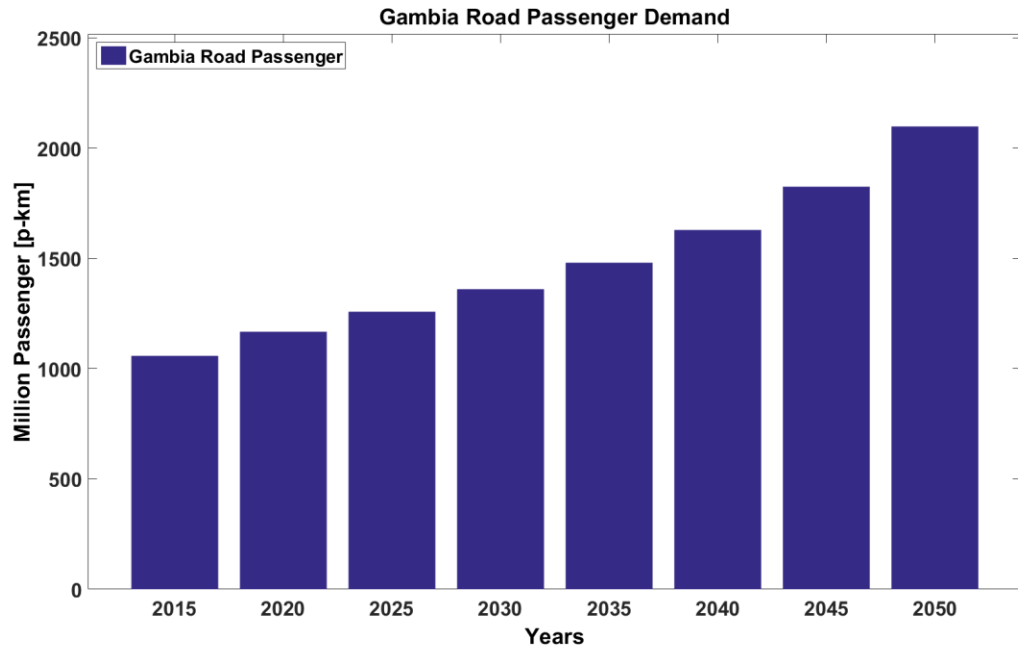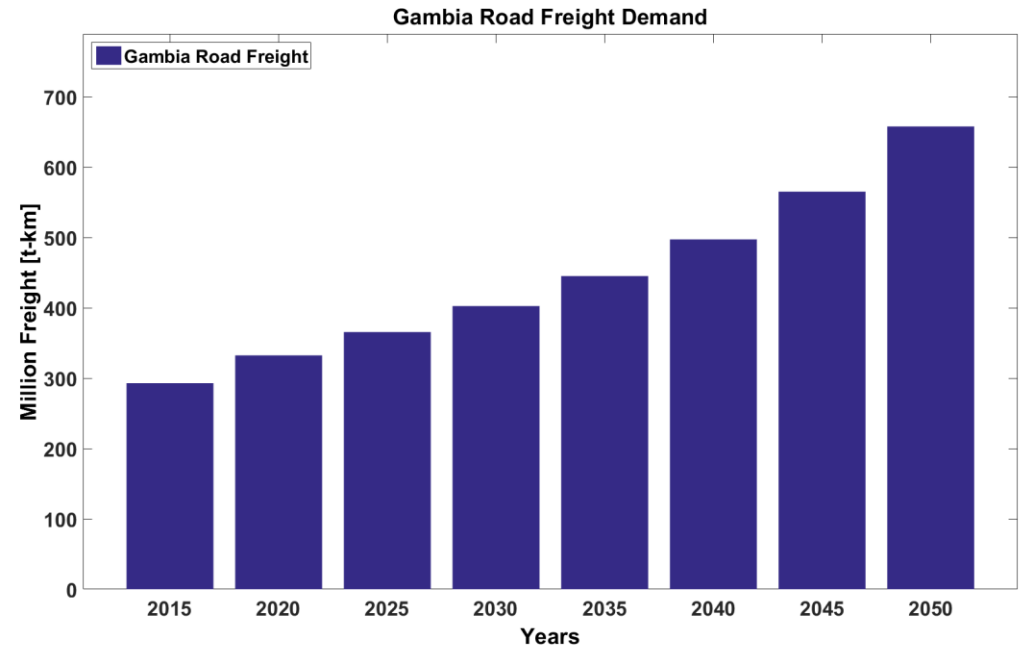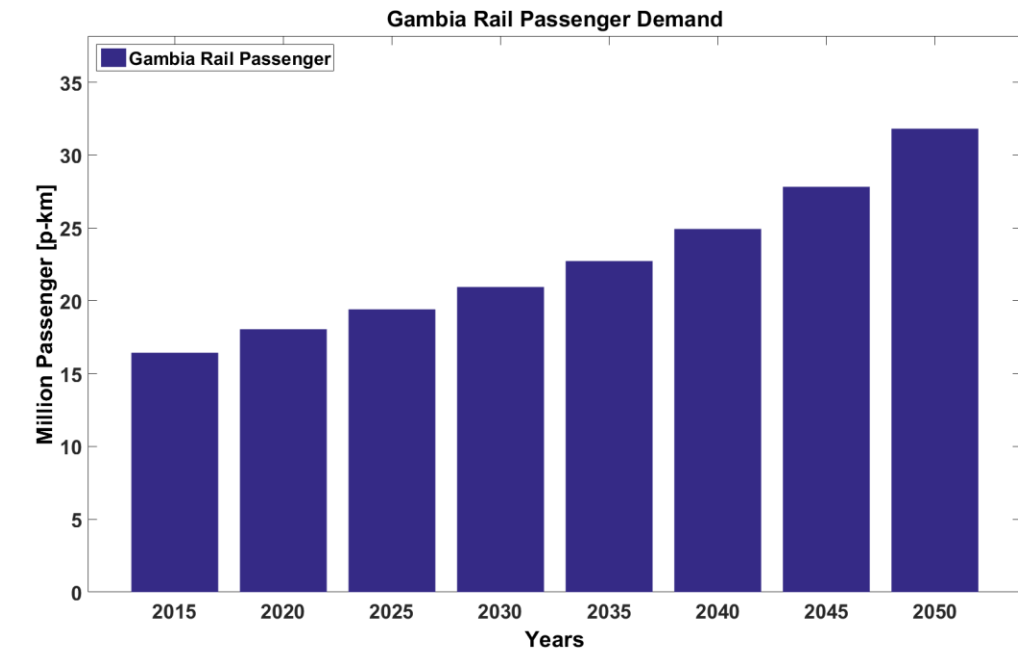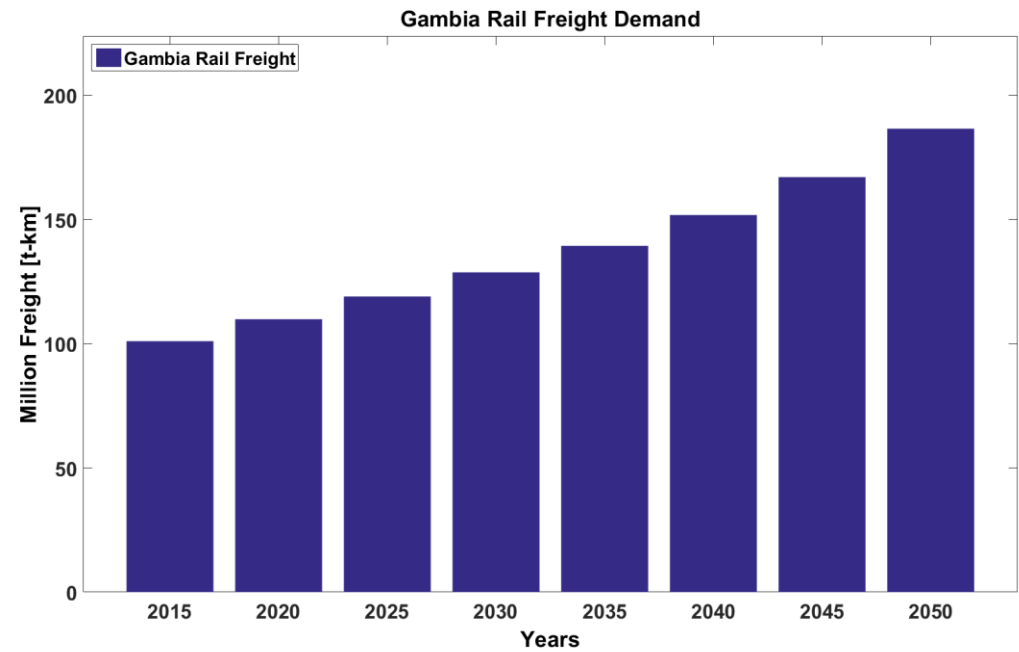

Gambia Marine Passenger Demand

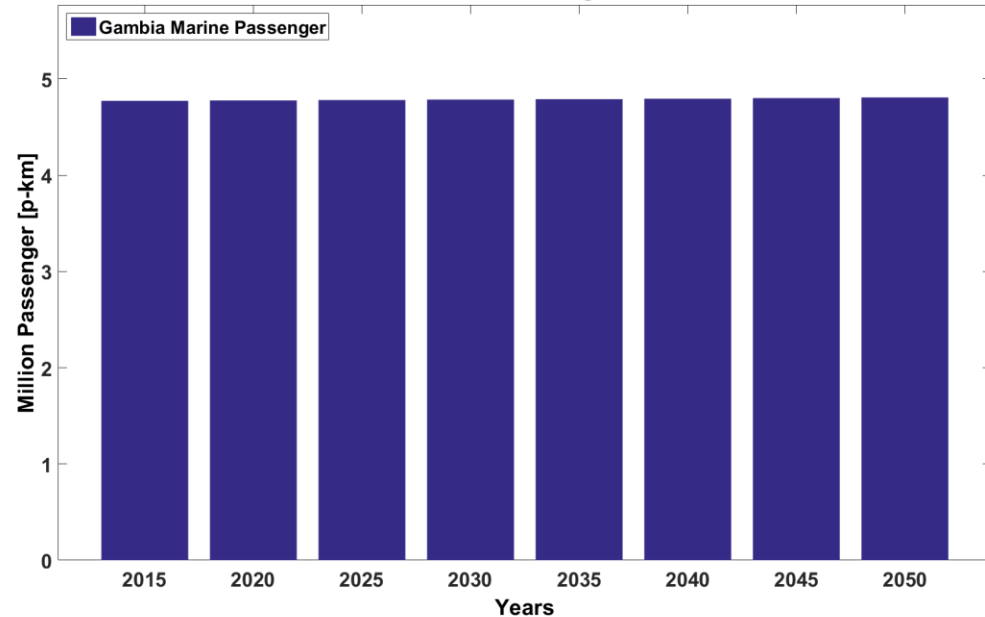

Gambia Marine Freight Demand

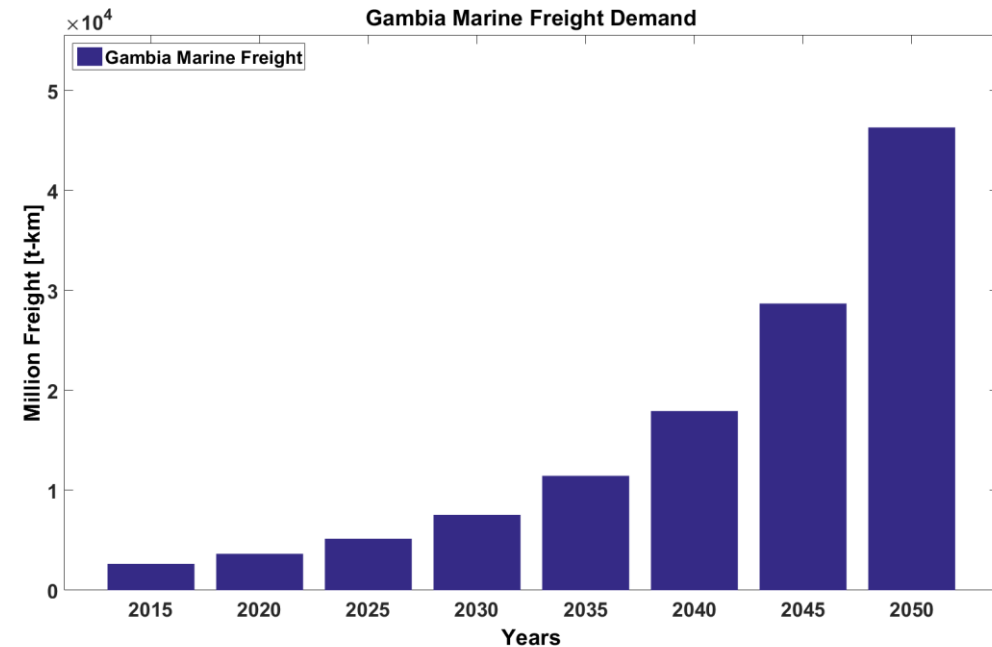

Gambia Aviation Passenger Demand

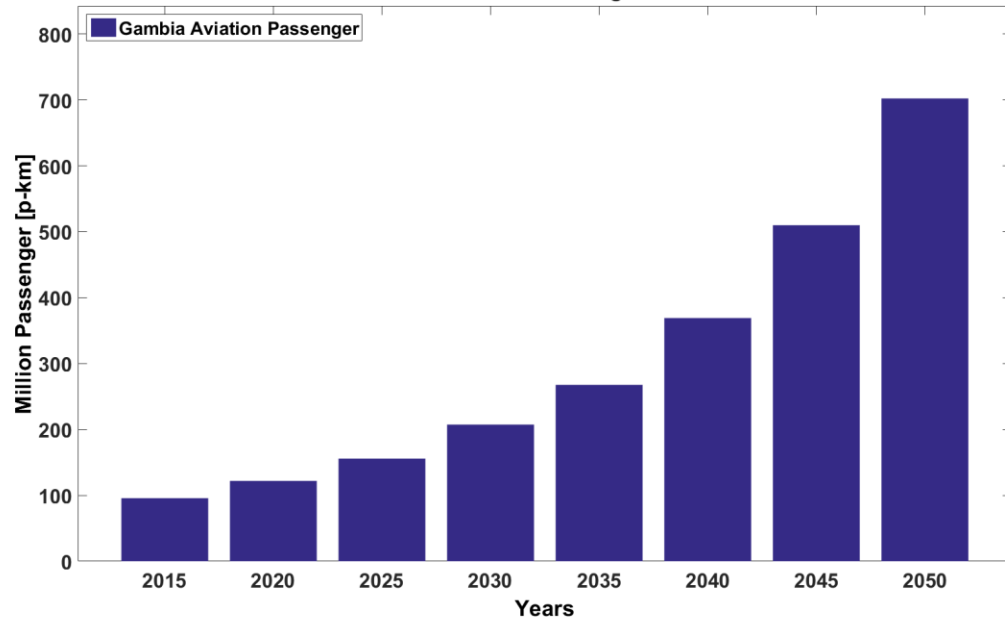

Gambia Aviation Freight Demand

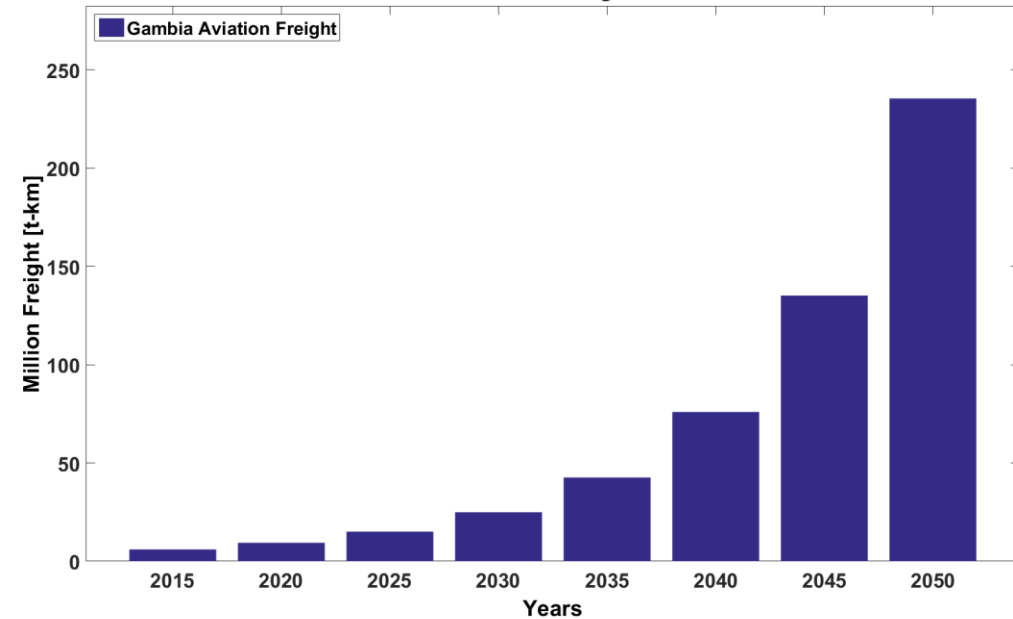

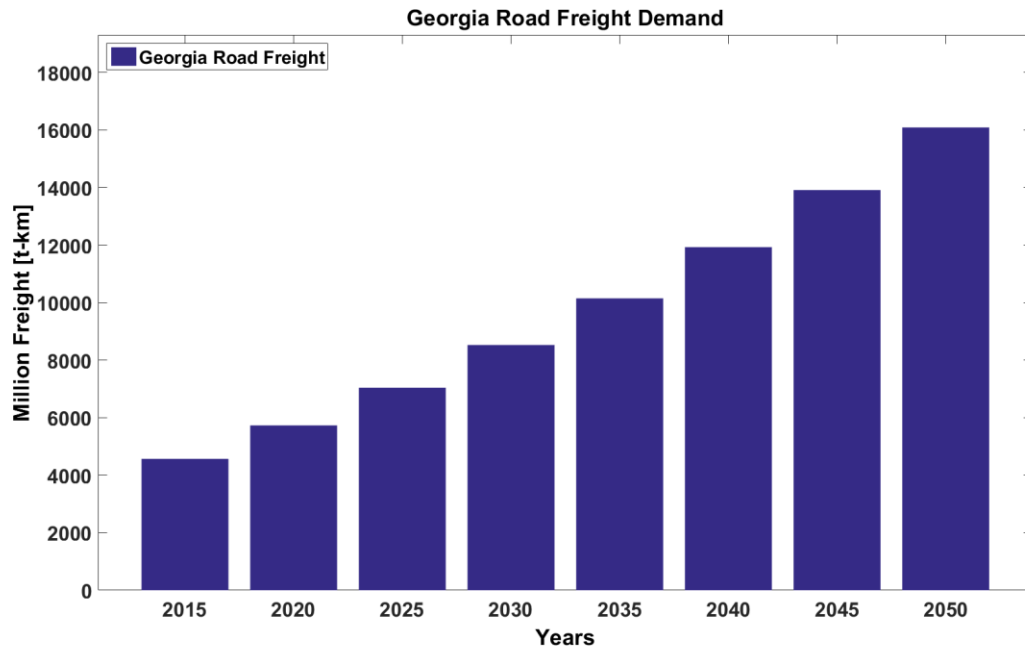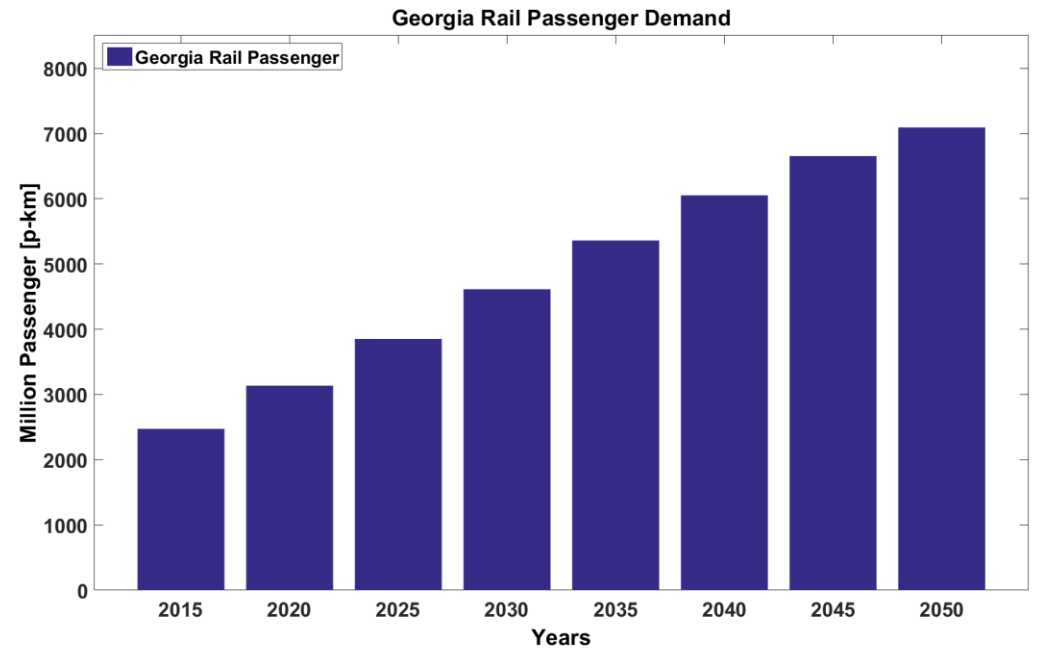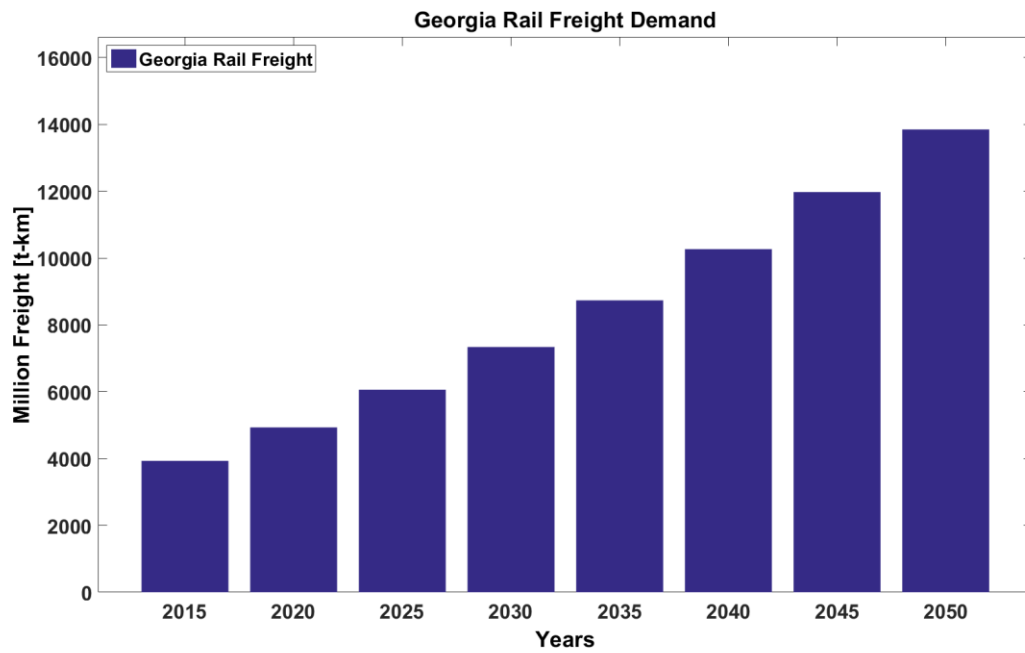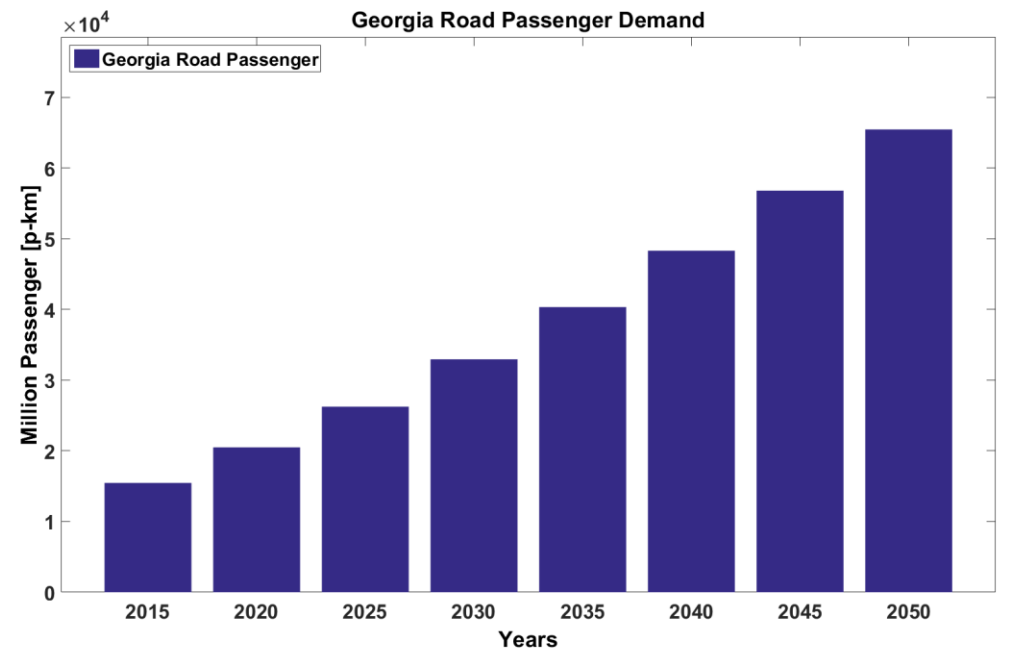

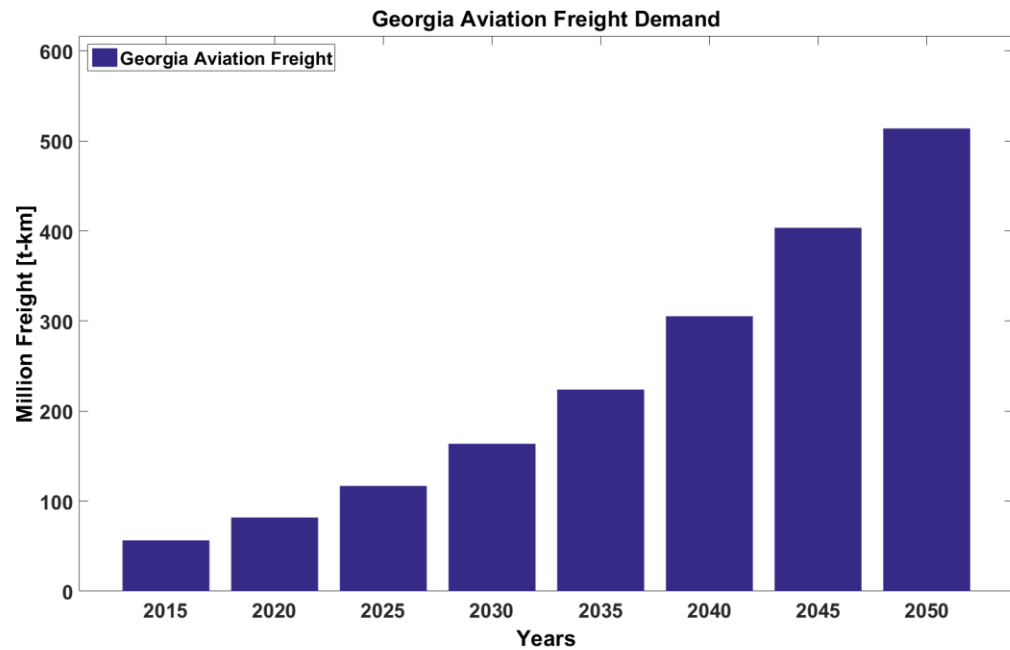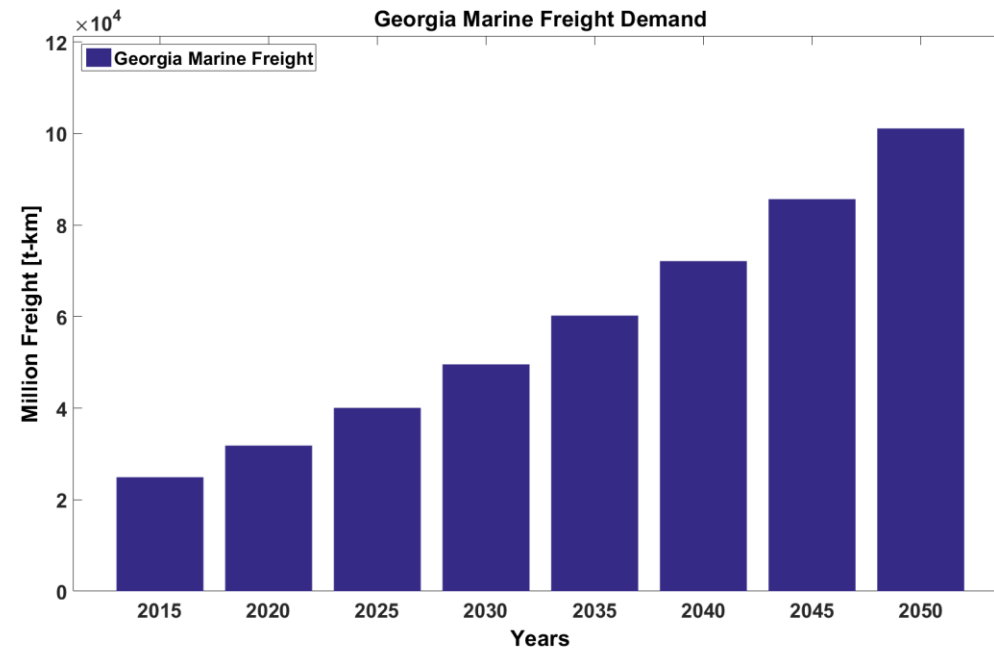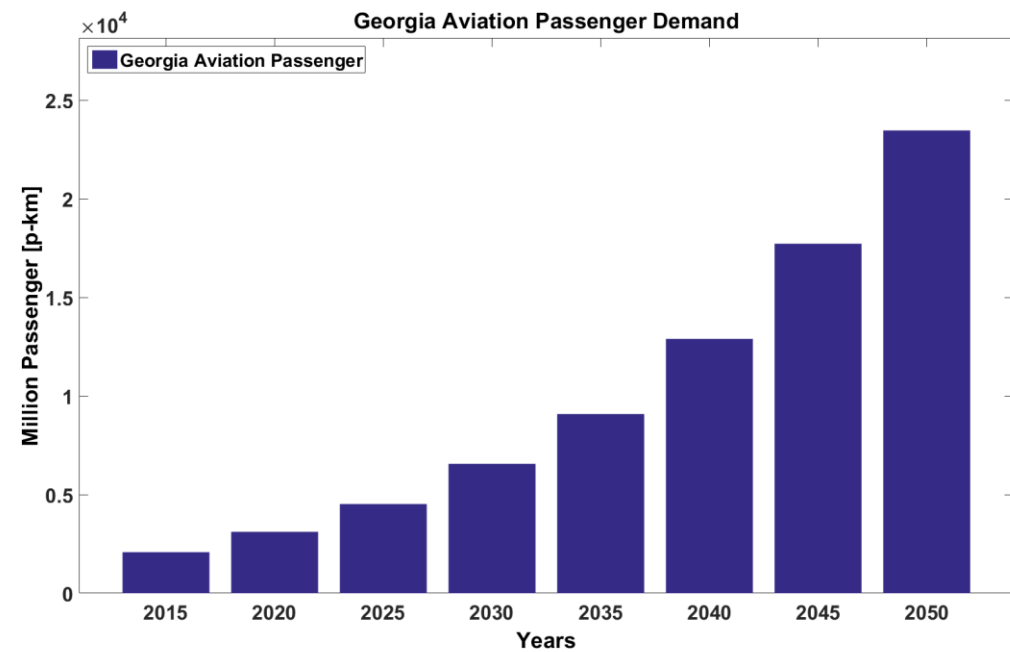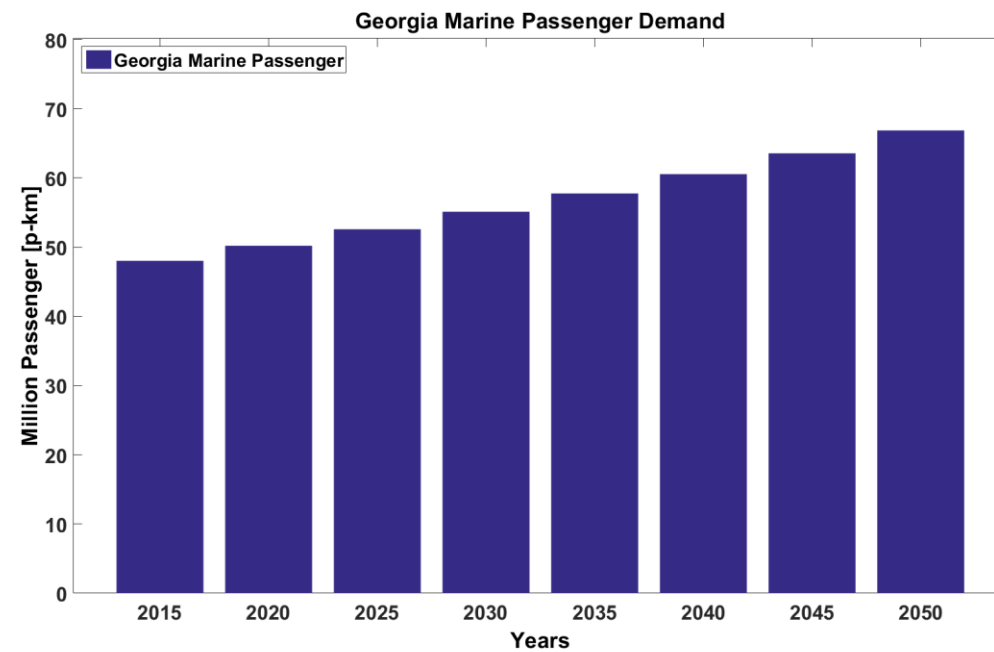

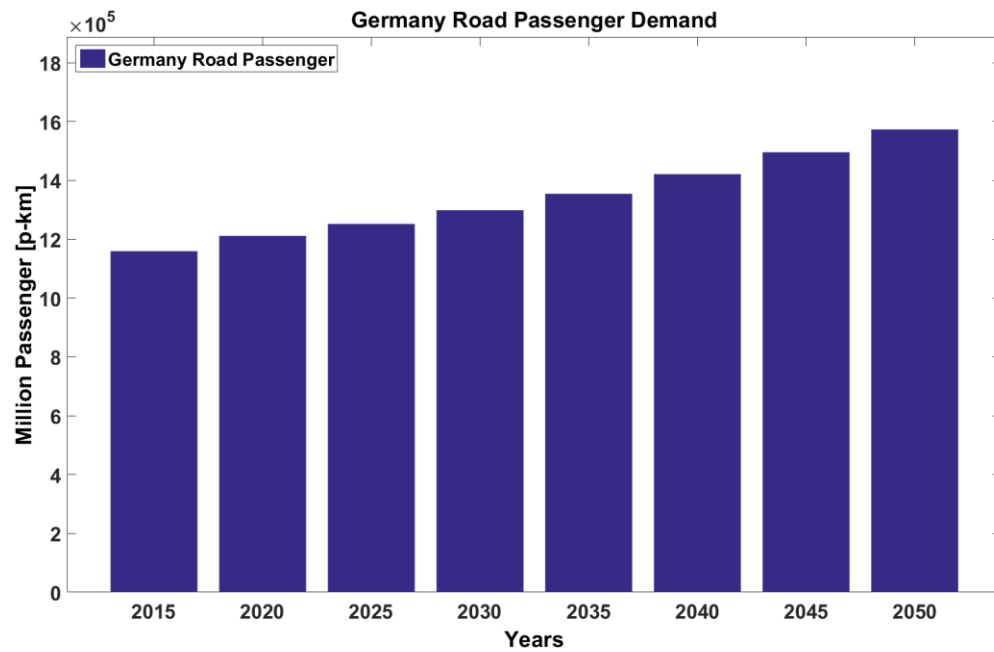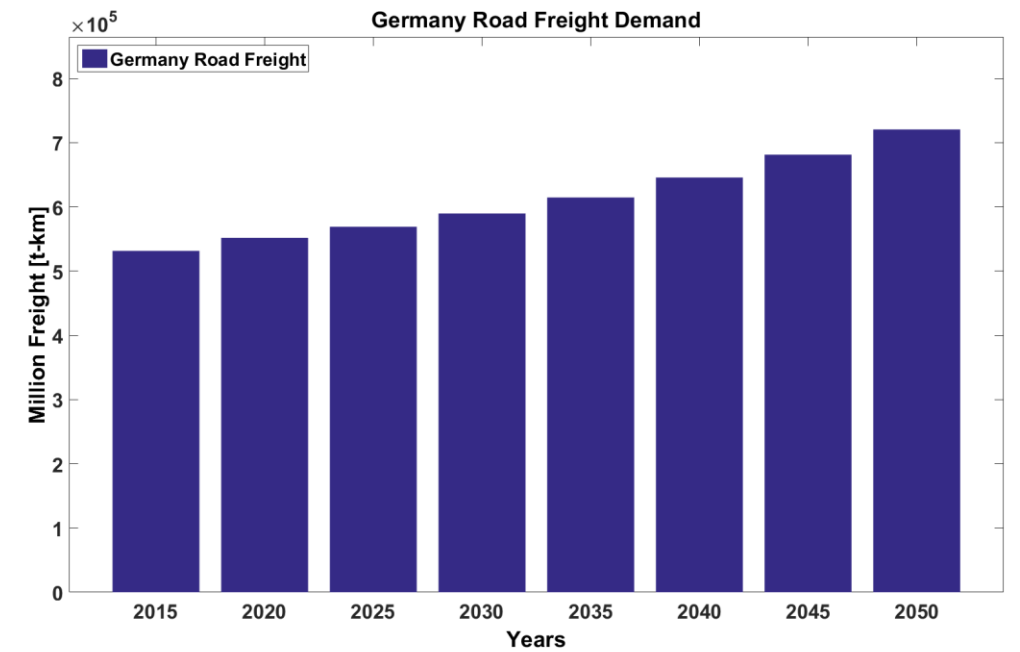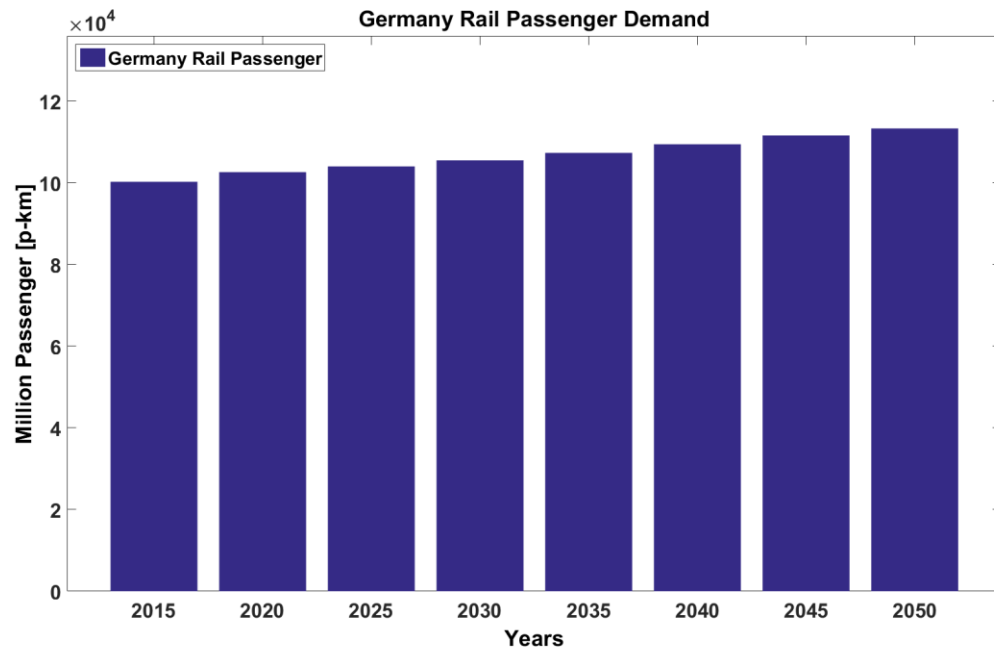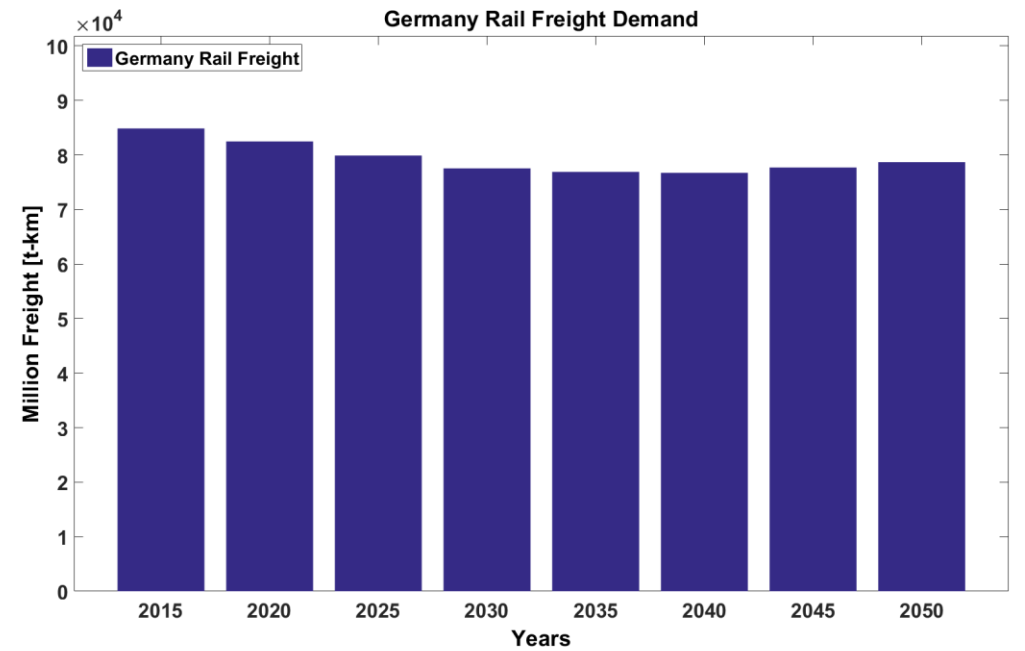

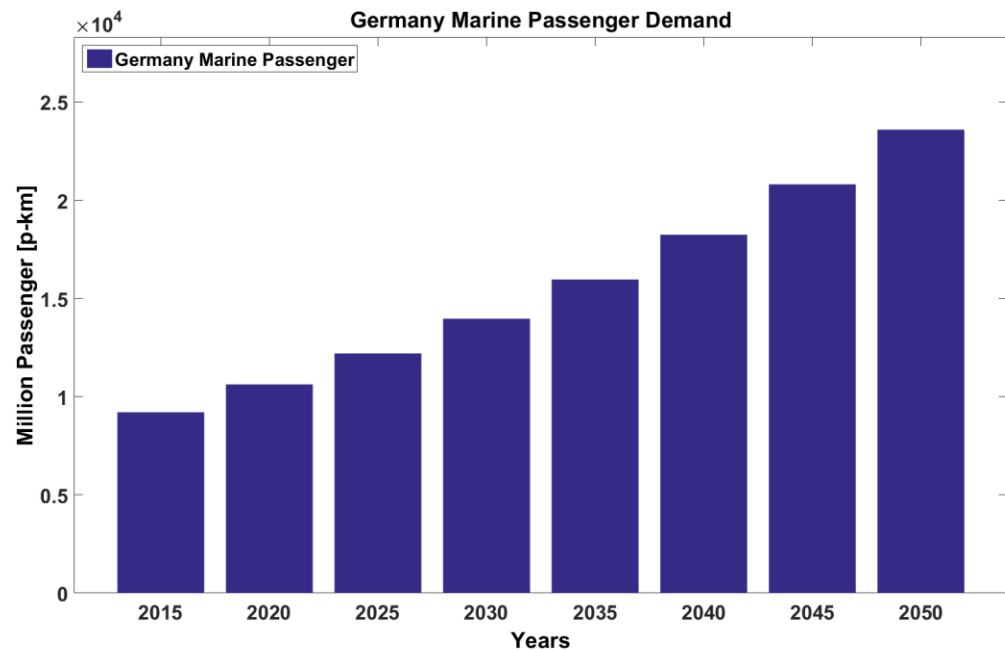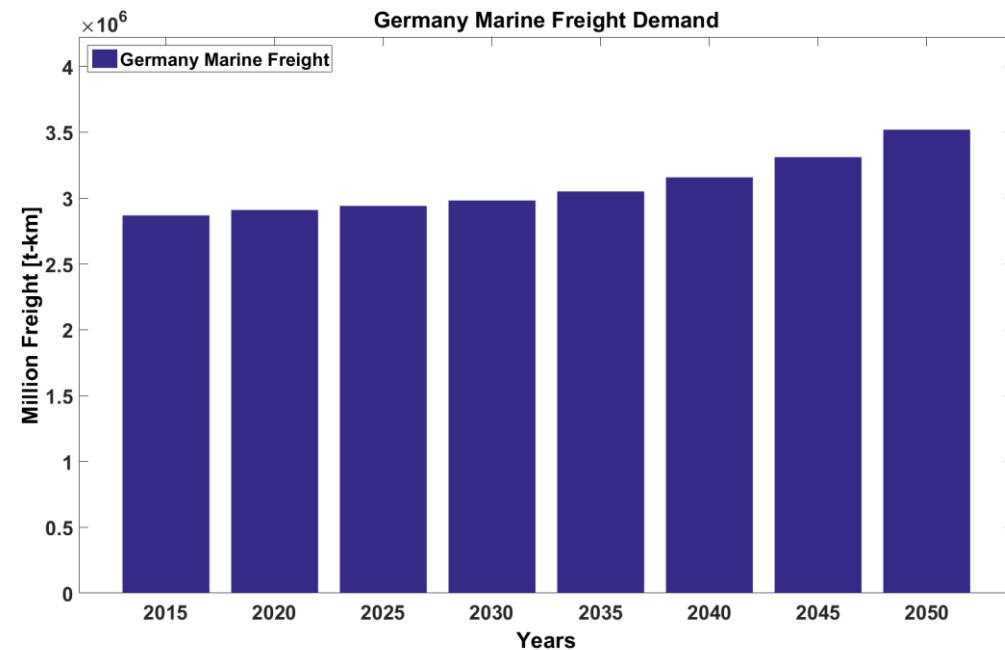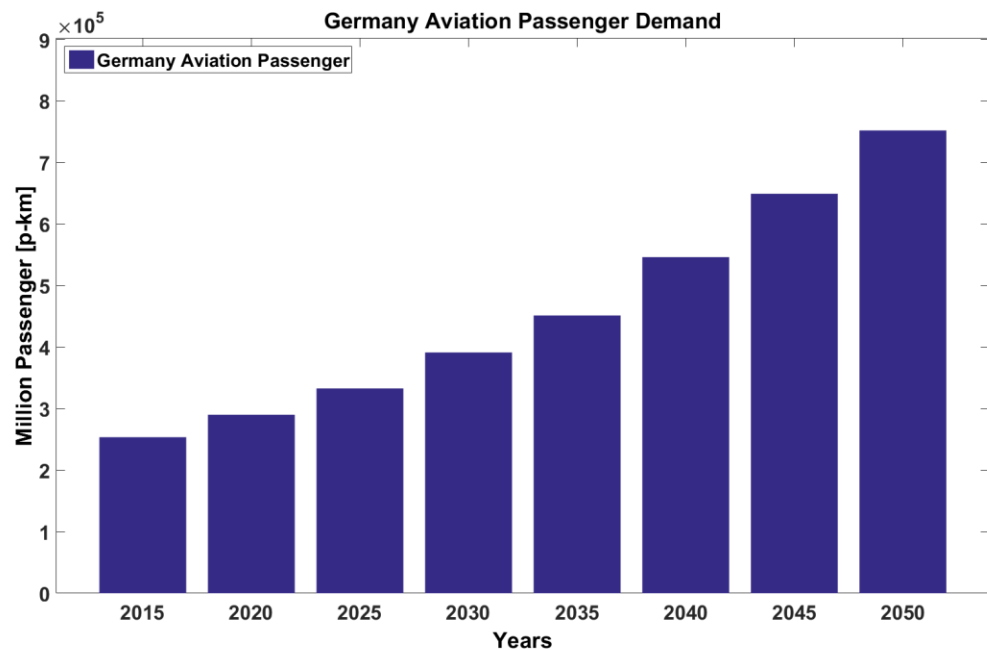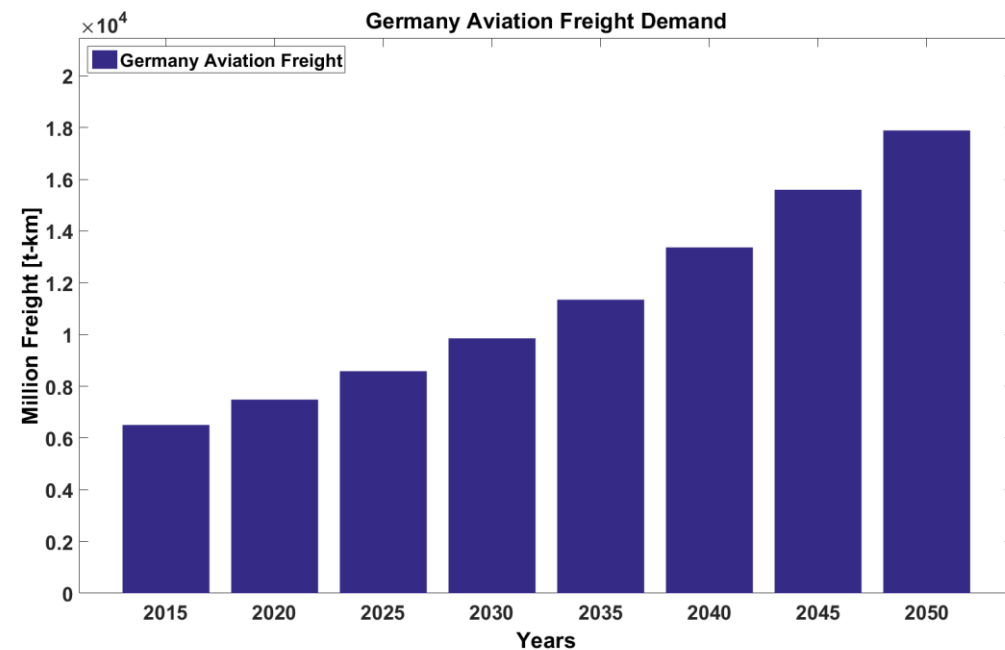

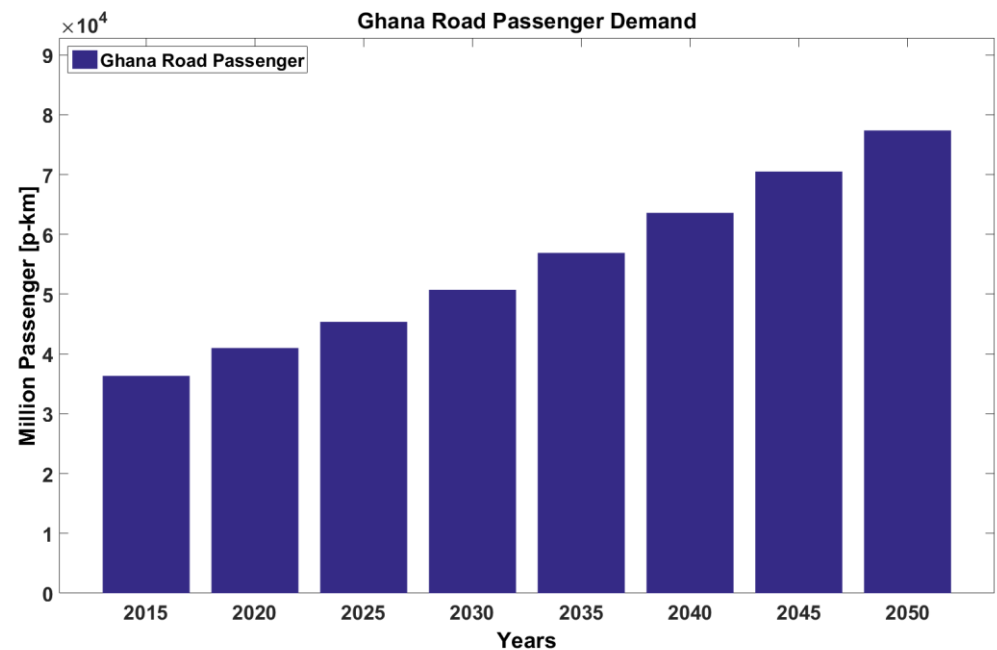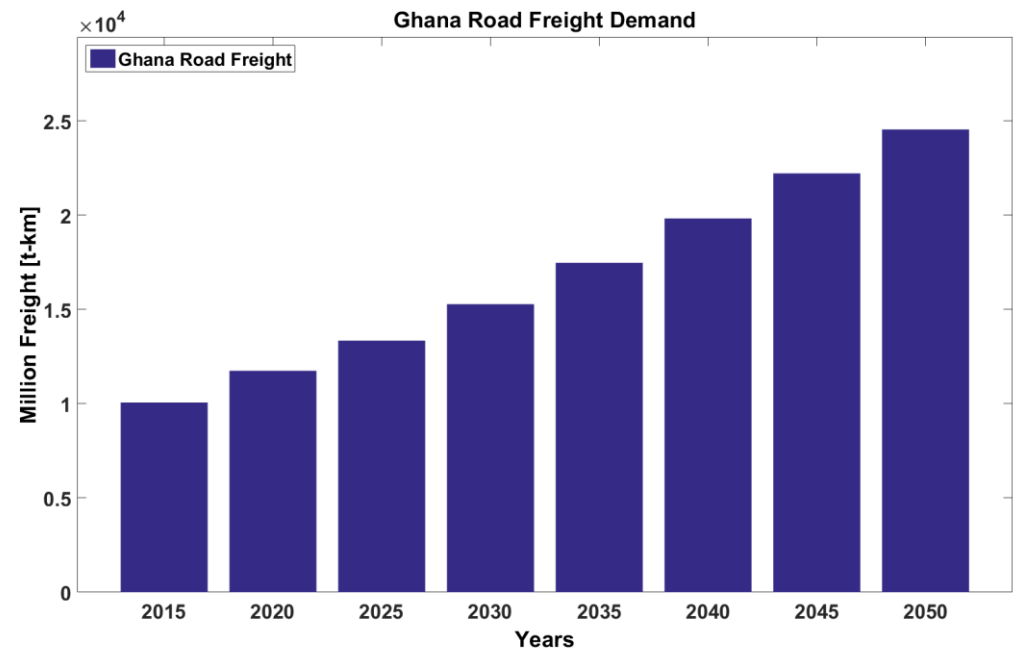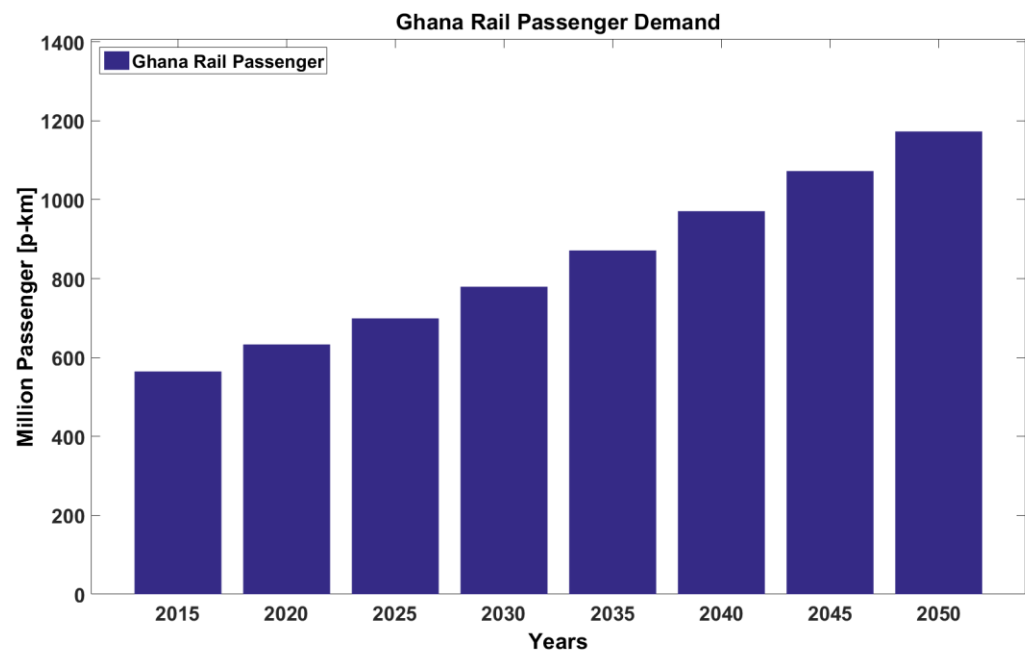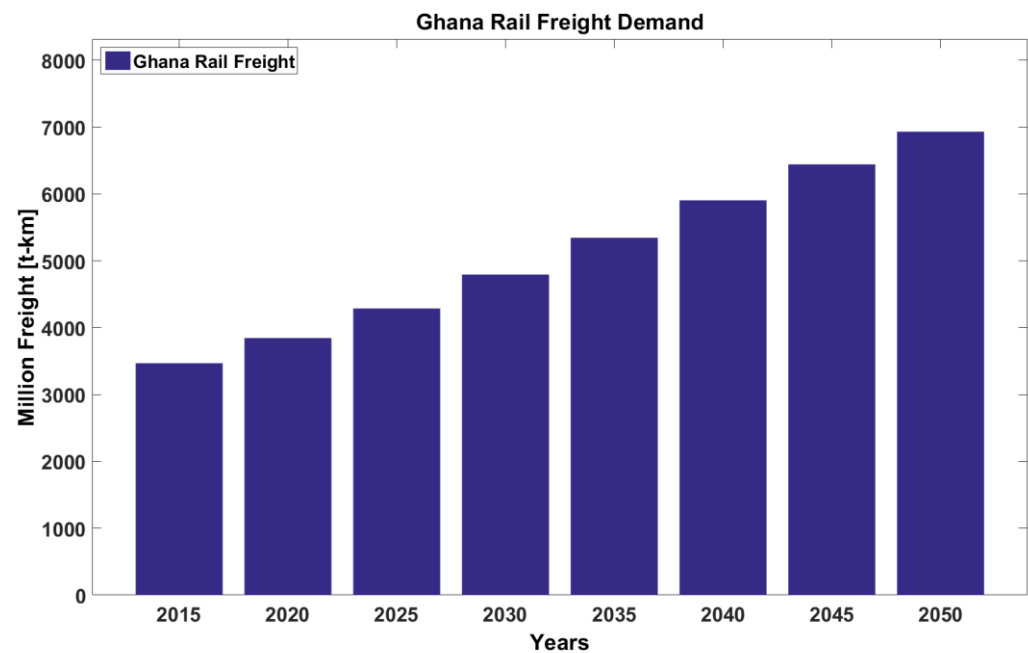

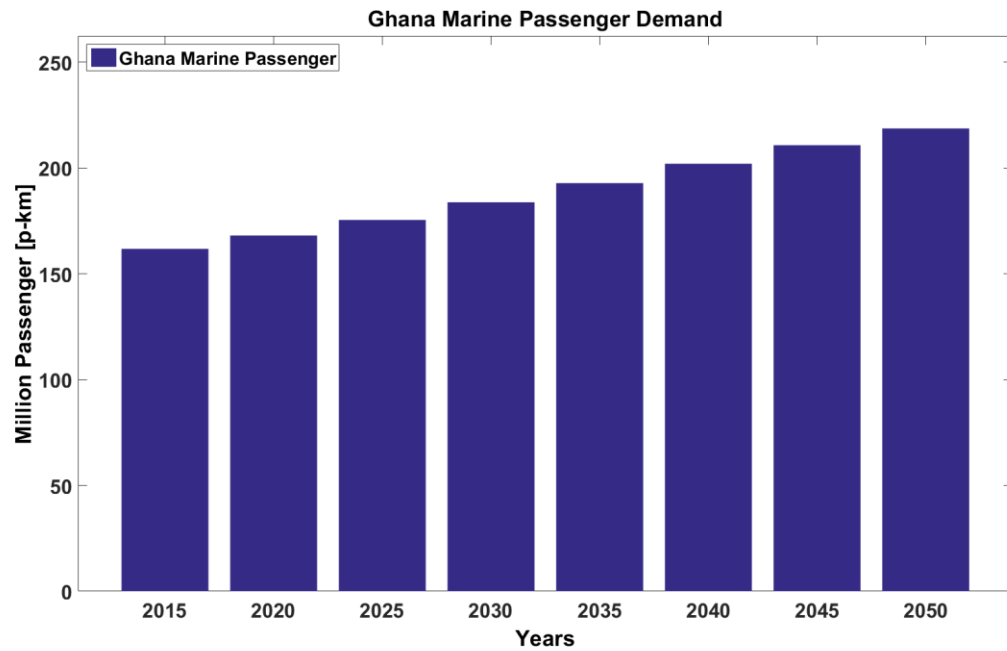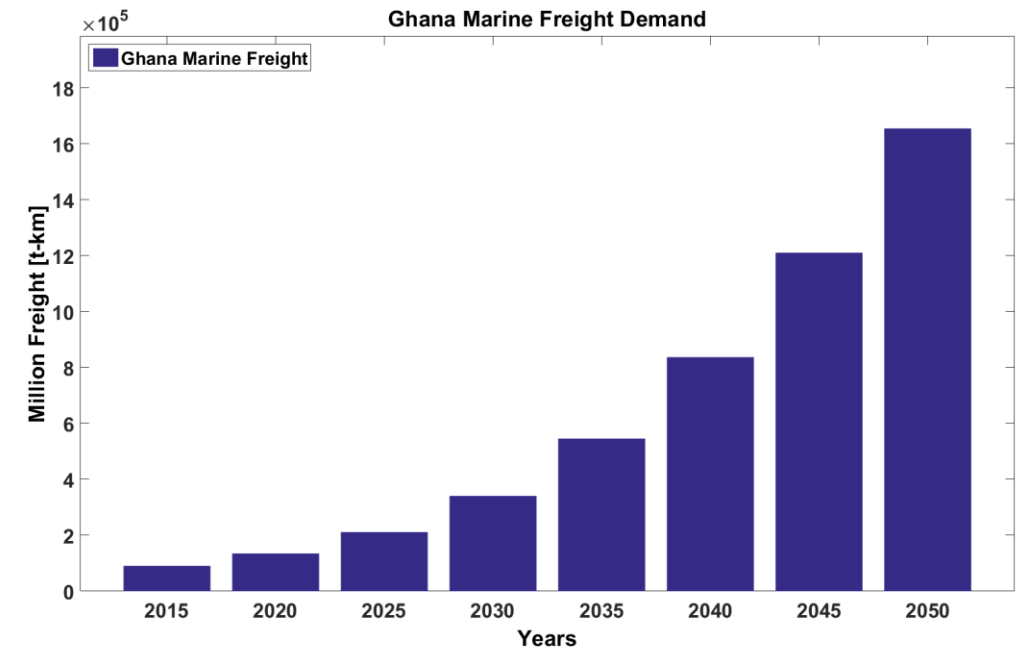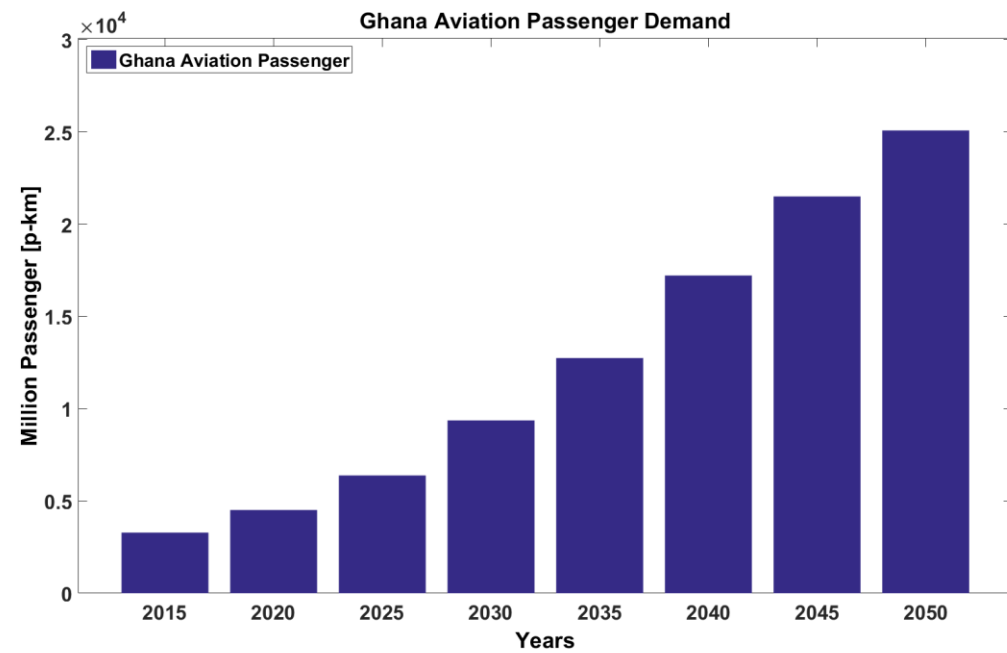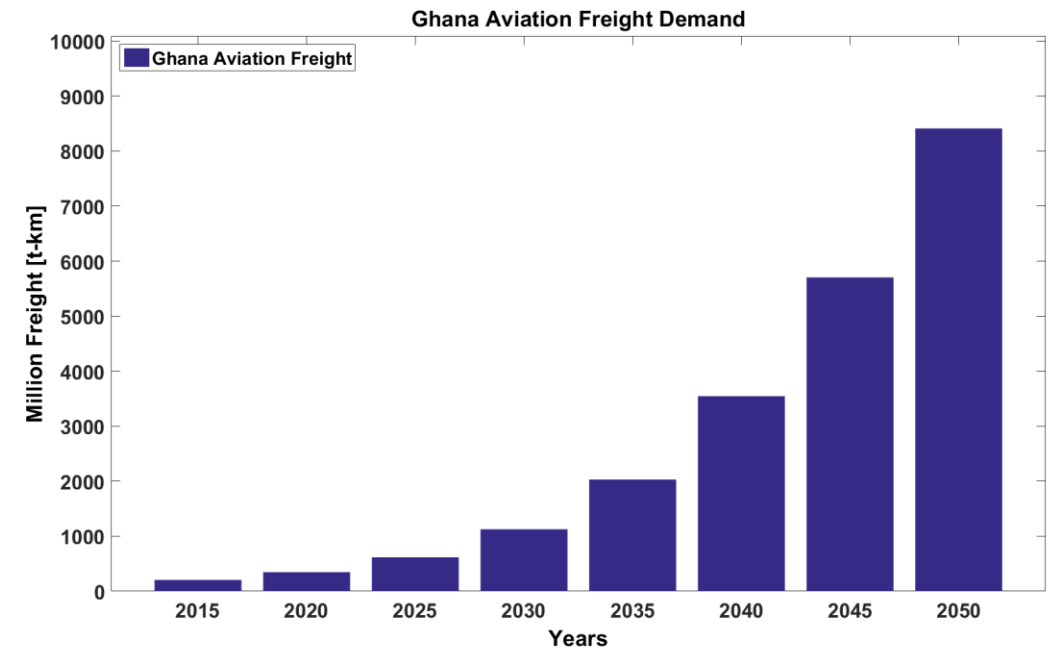

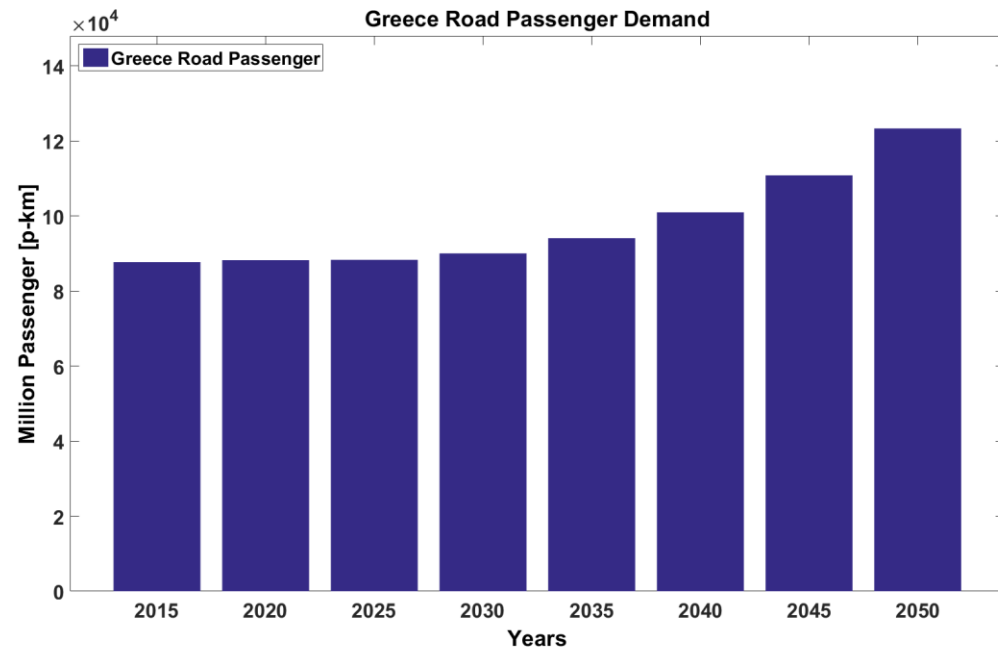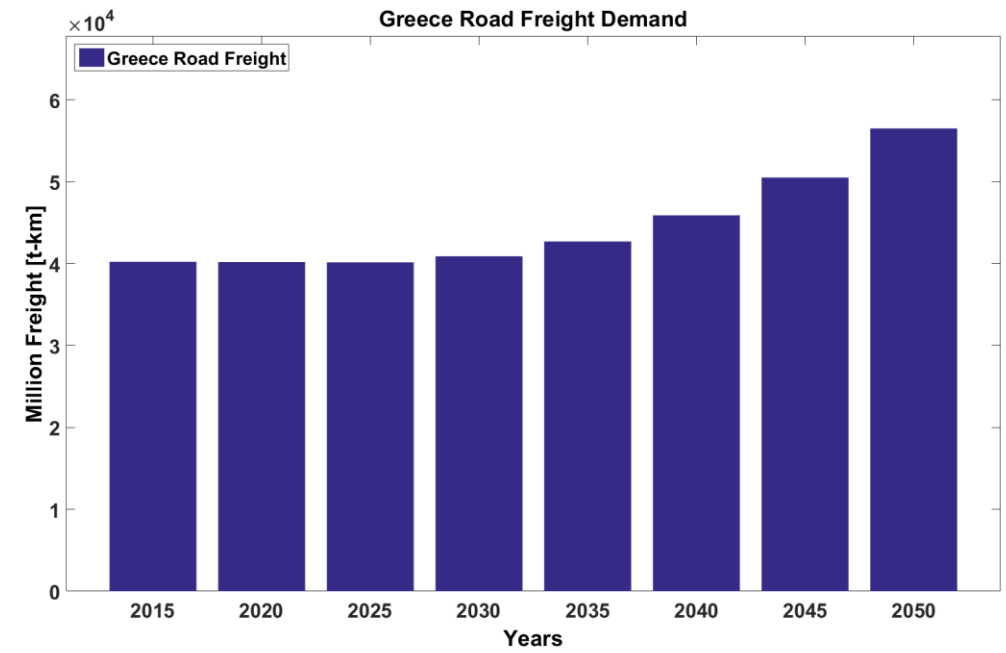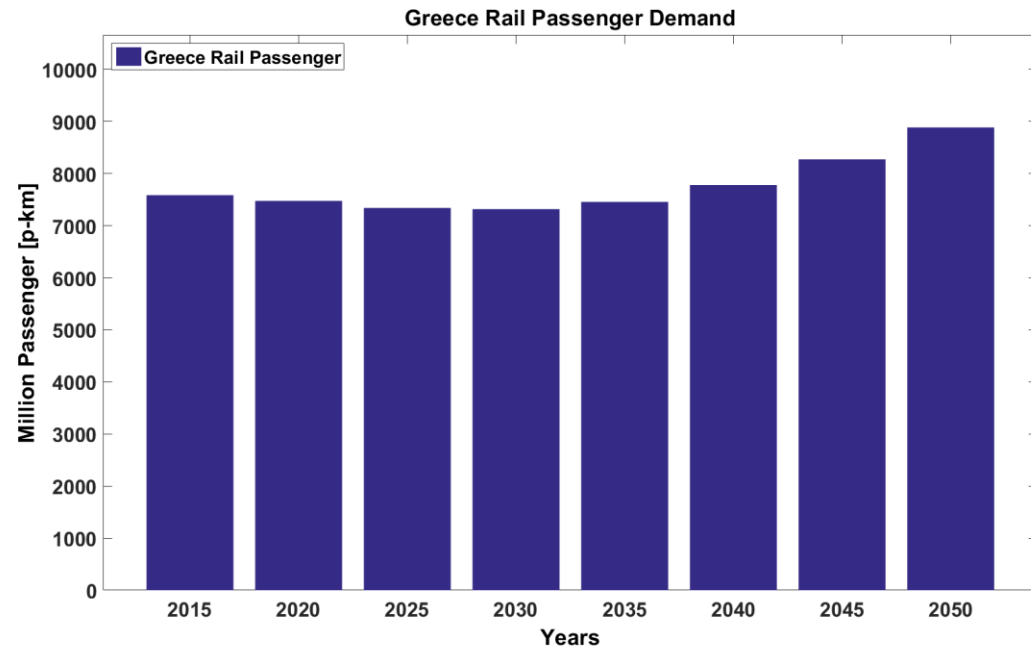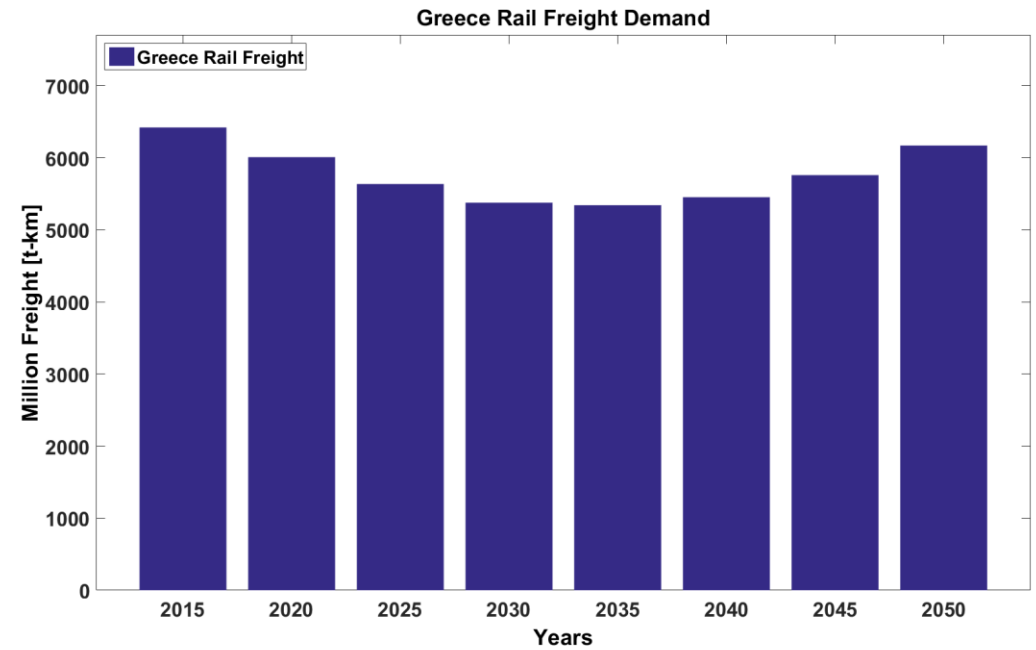

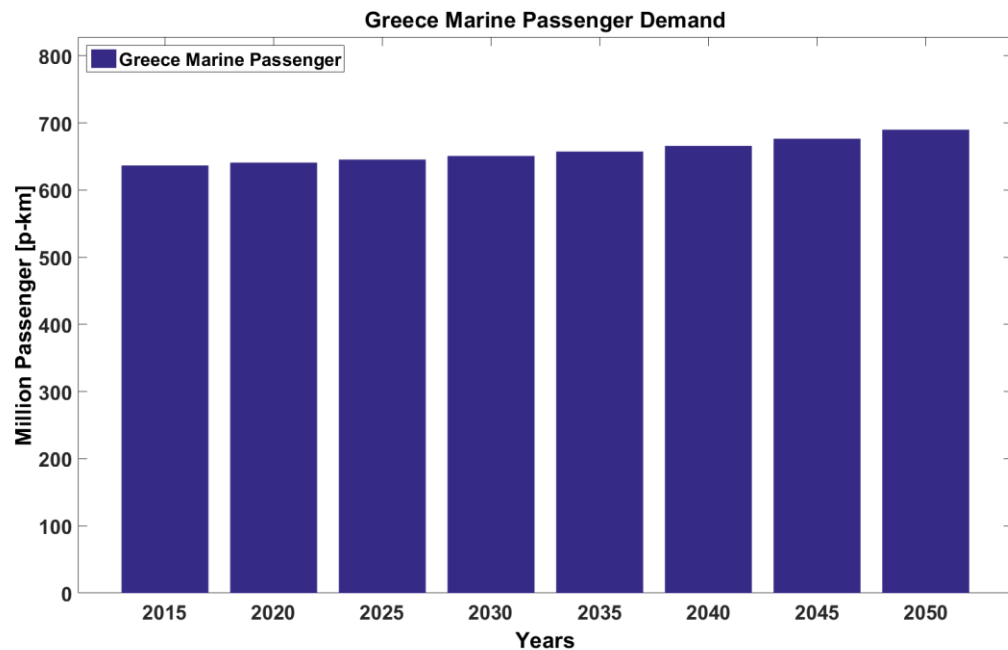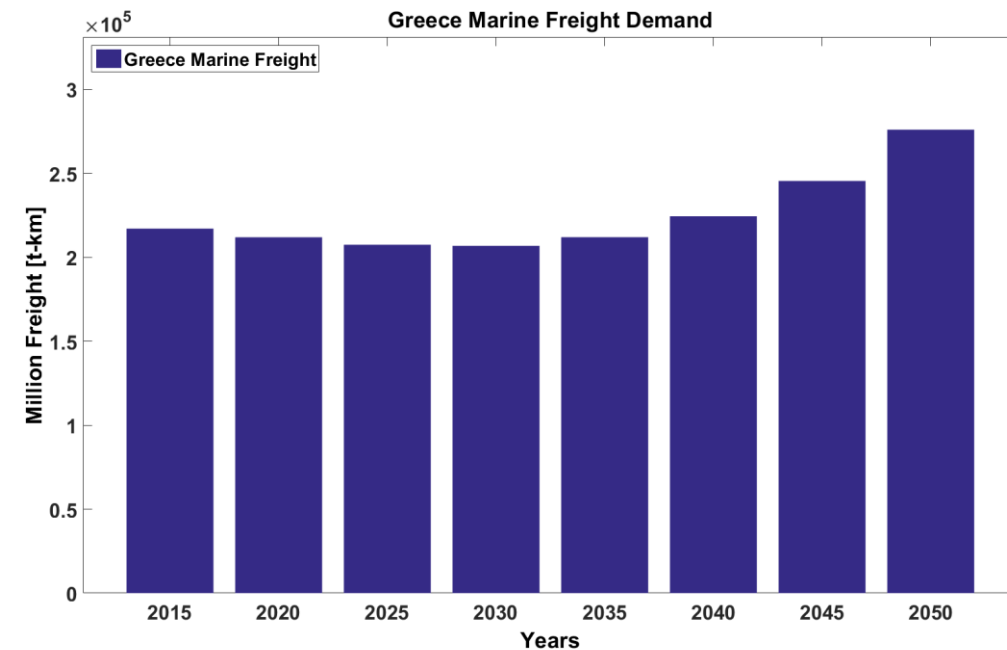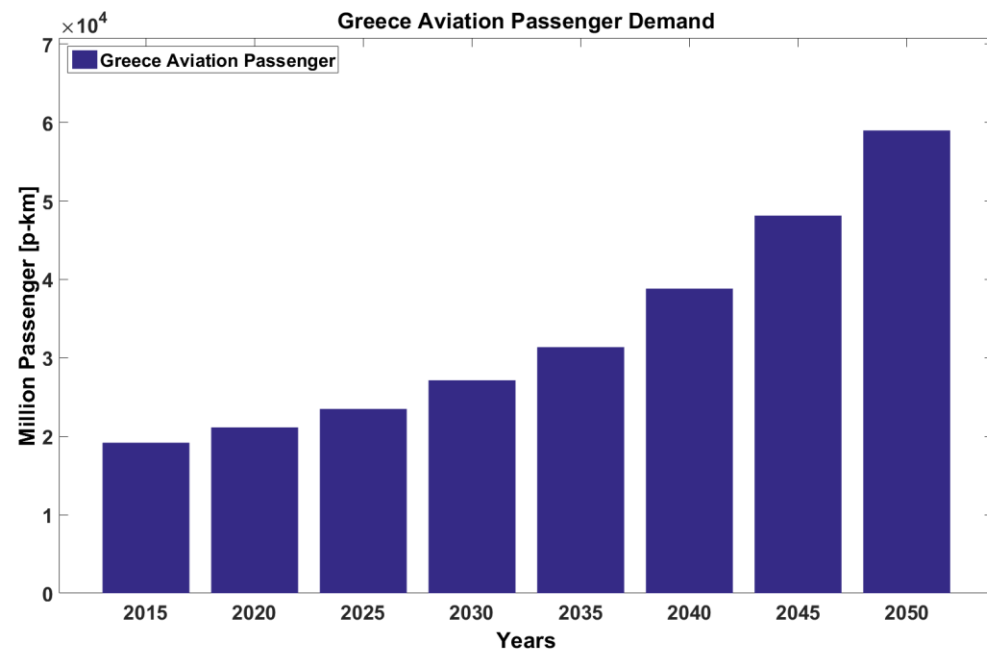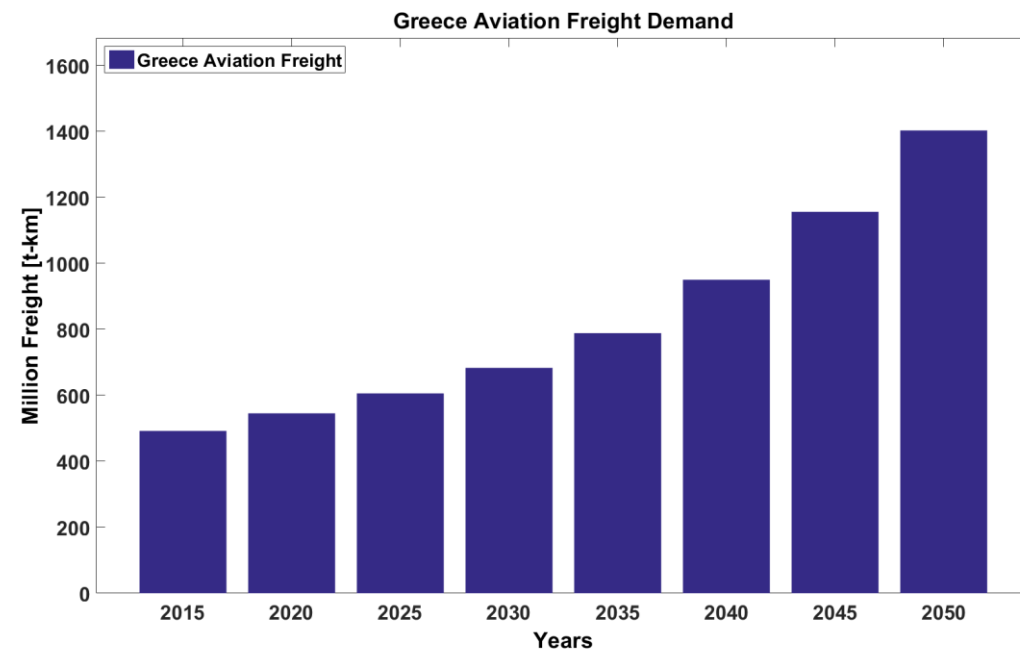

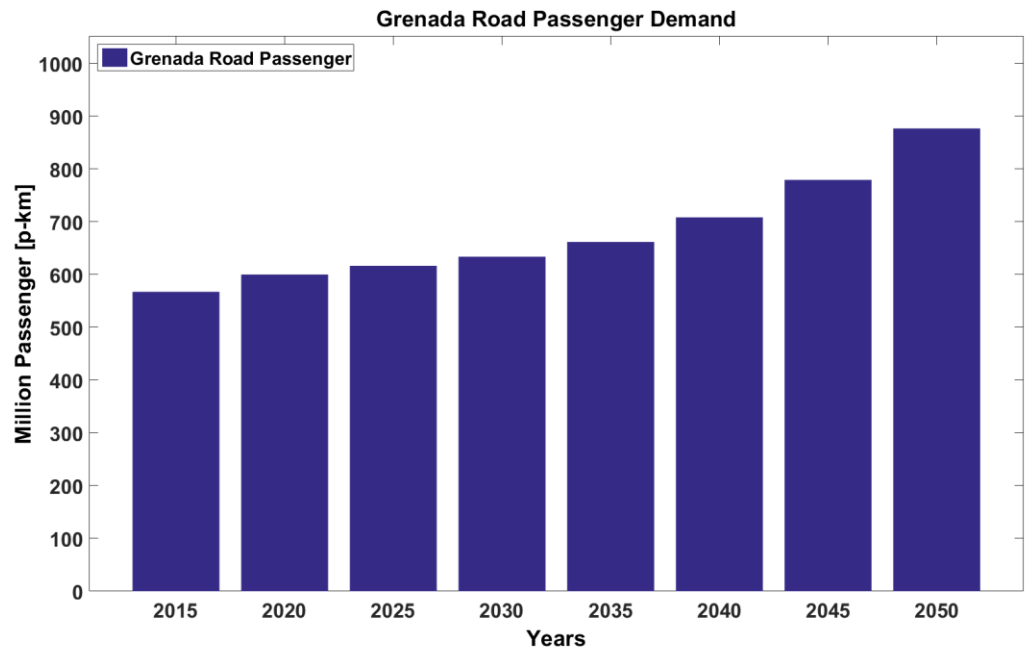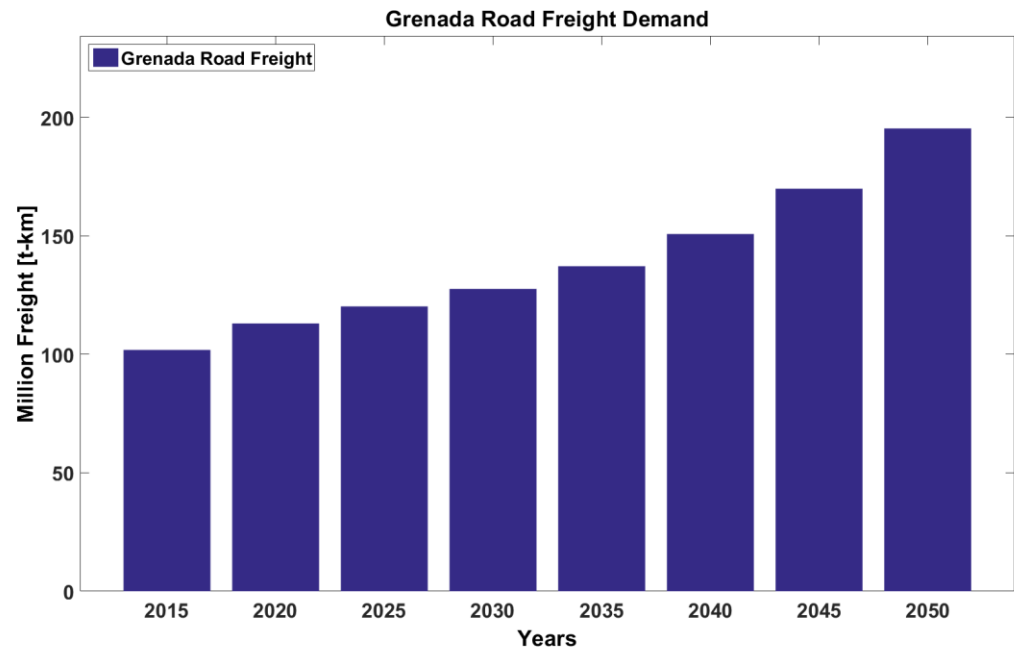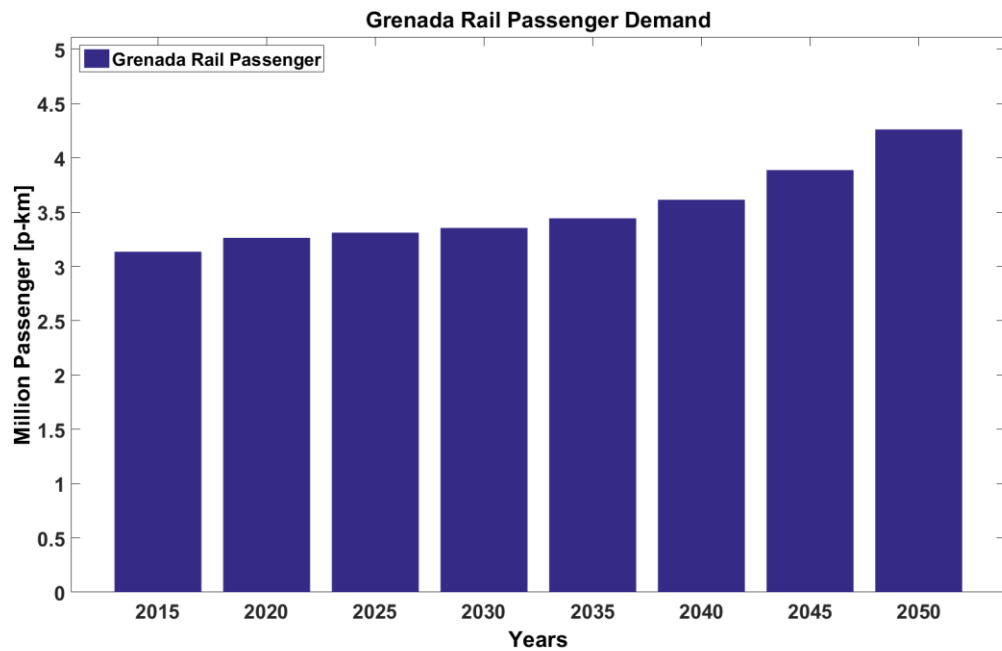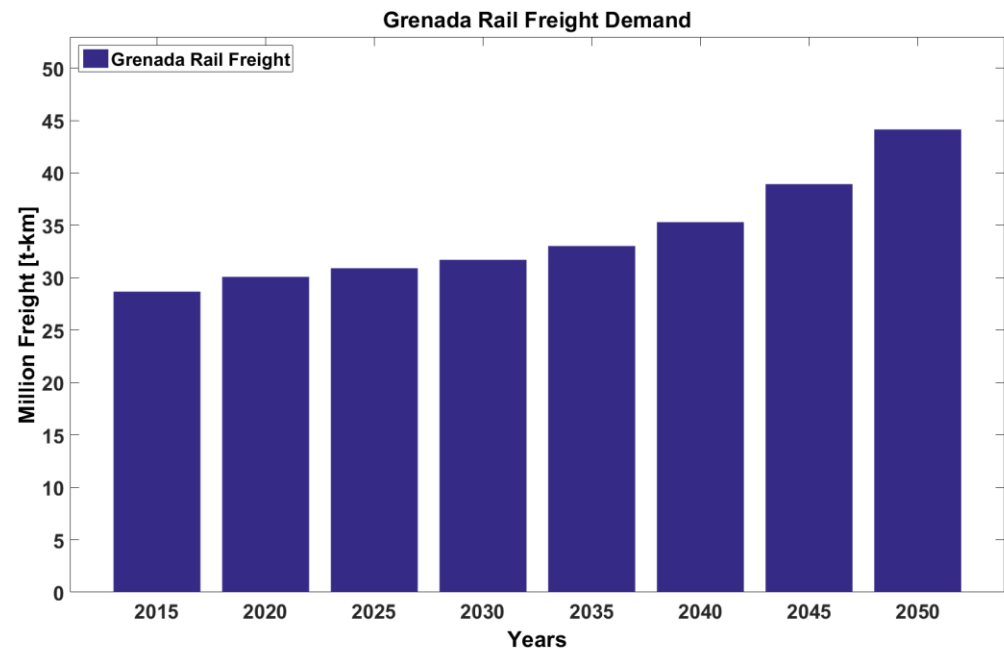

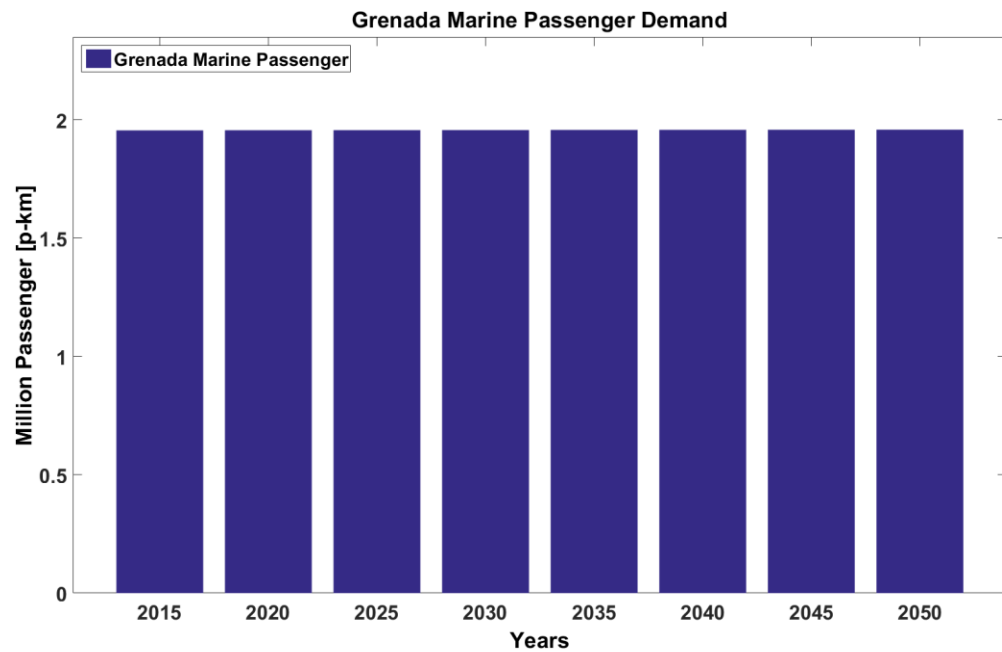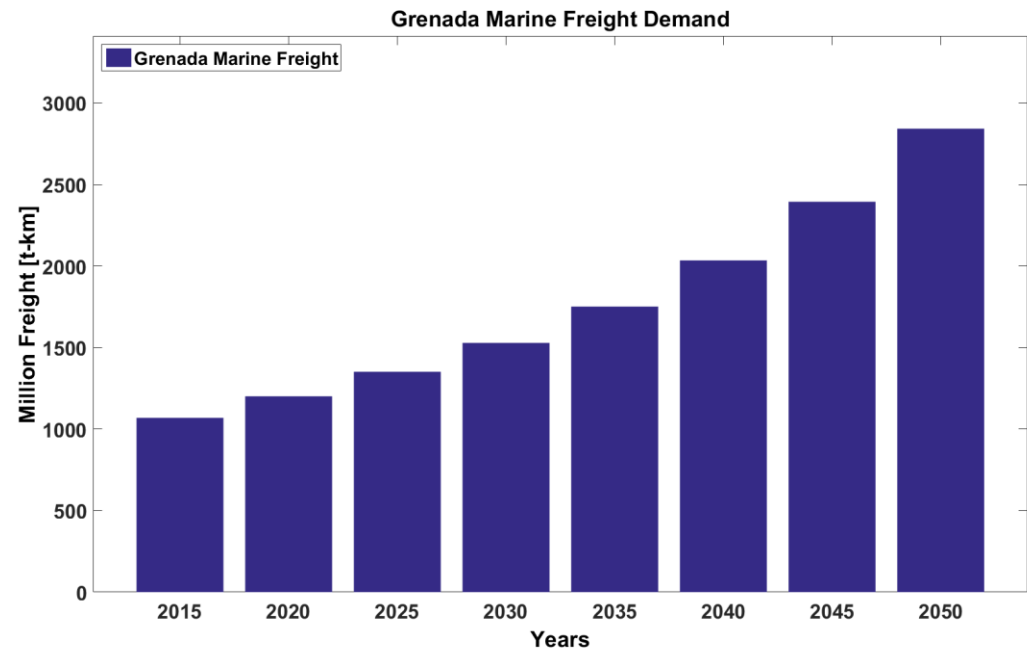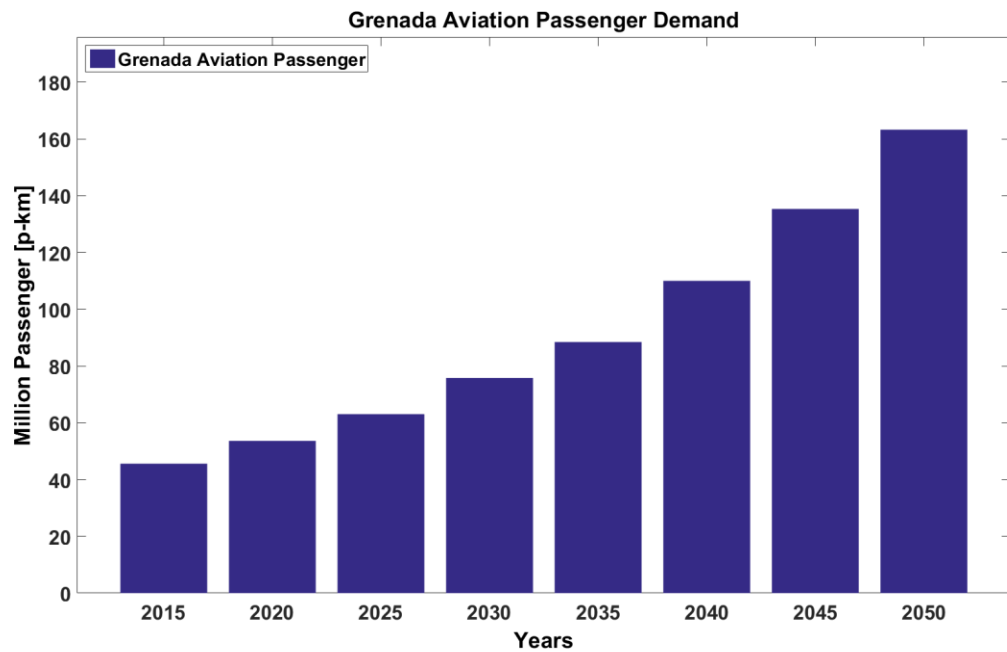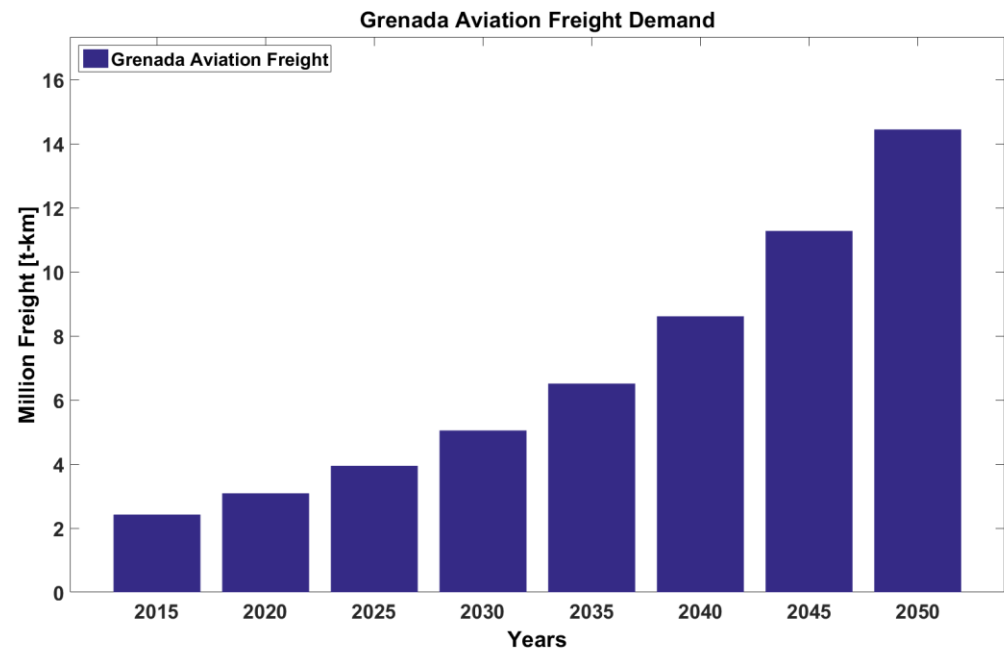

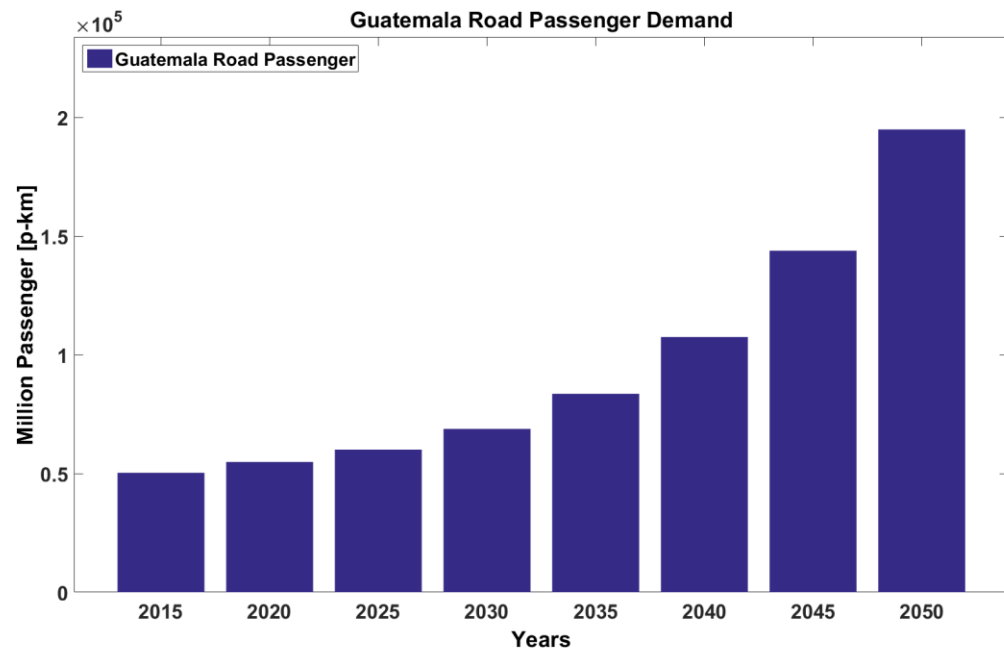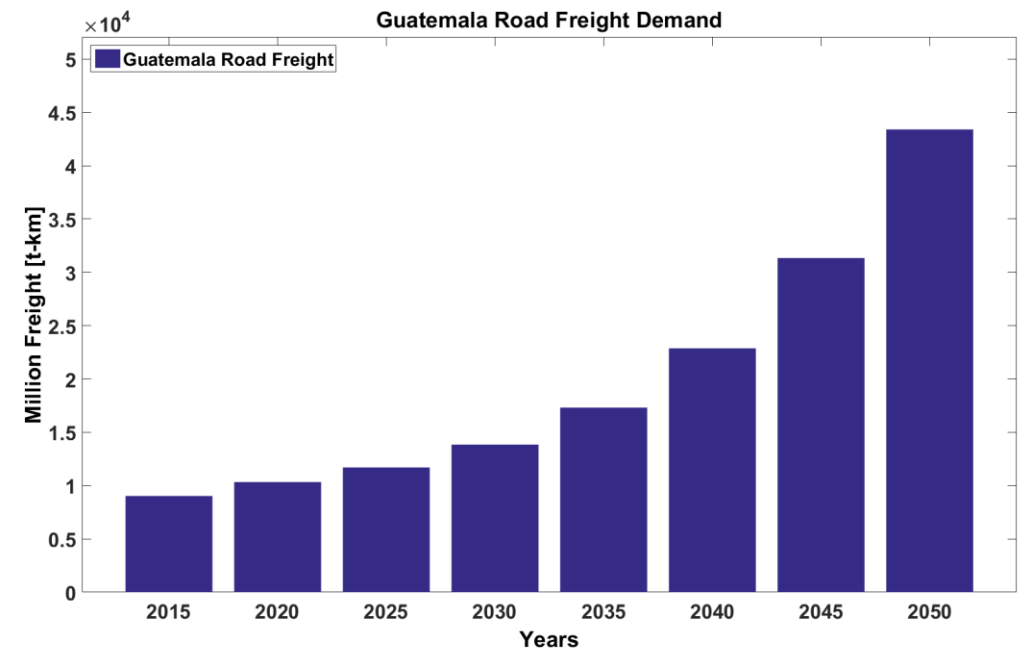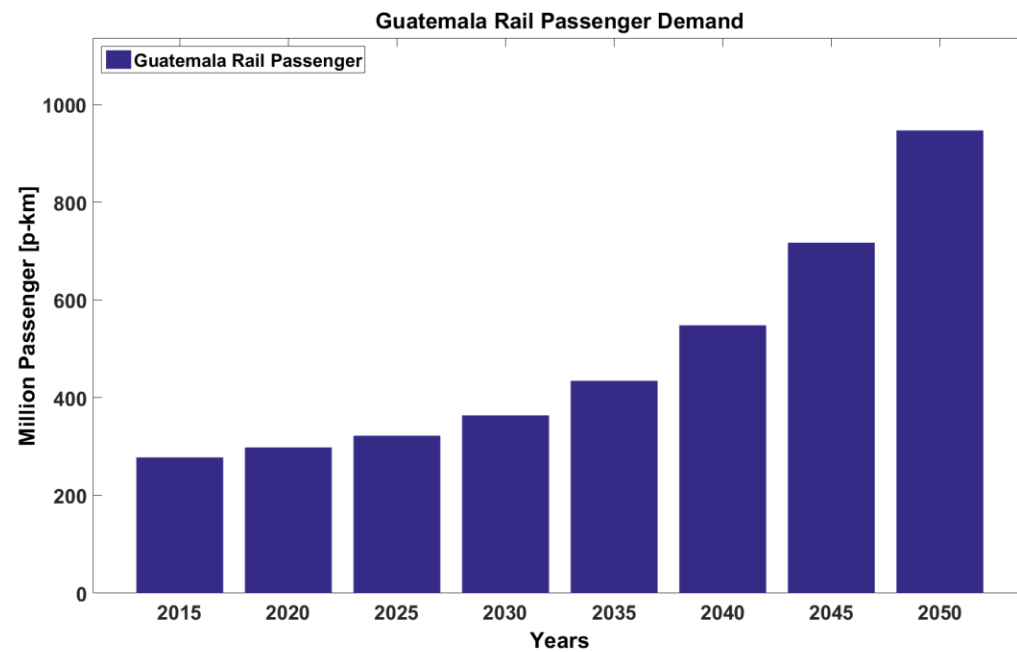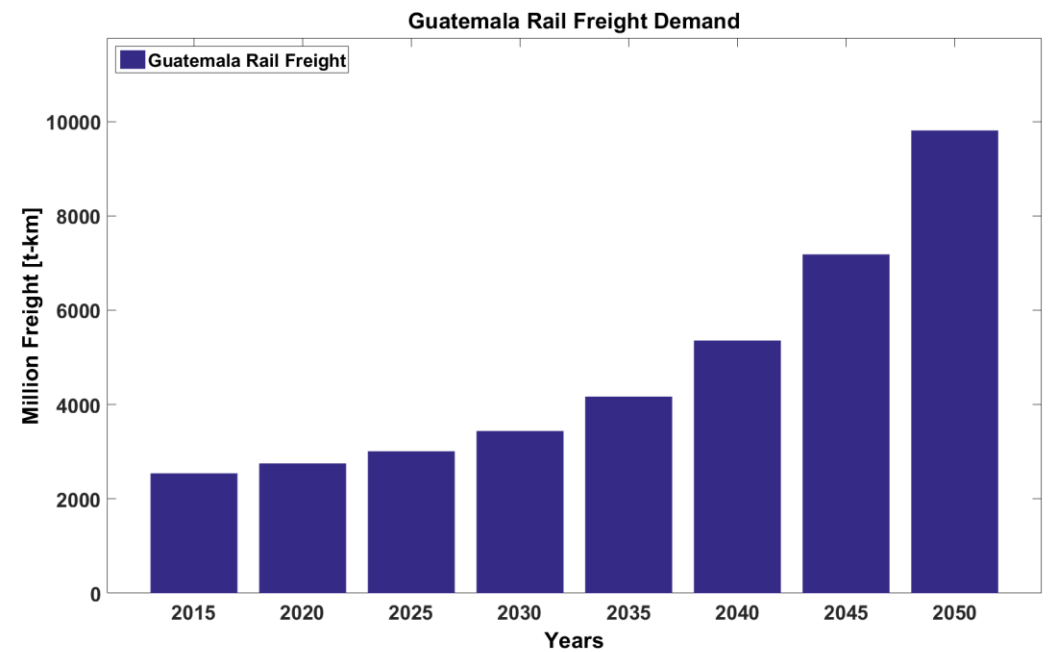

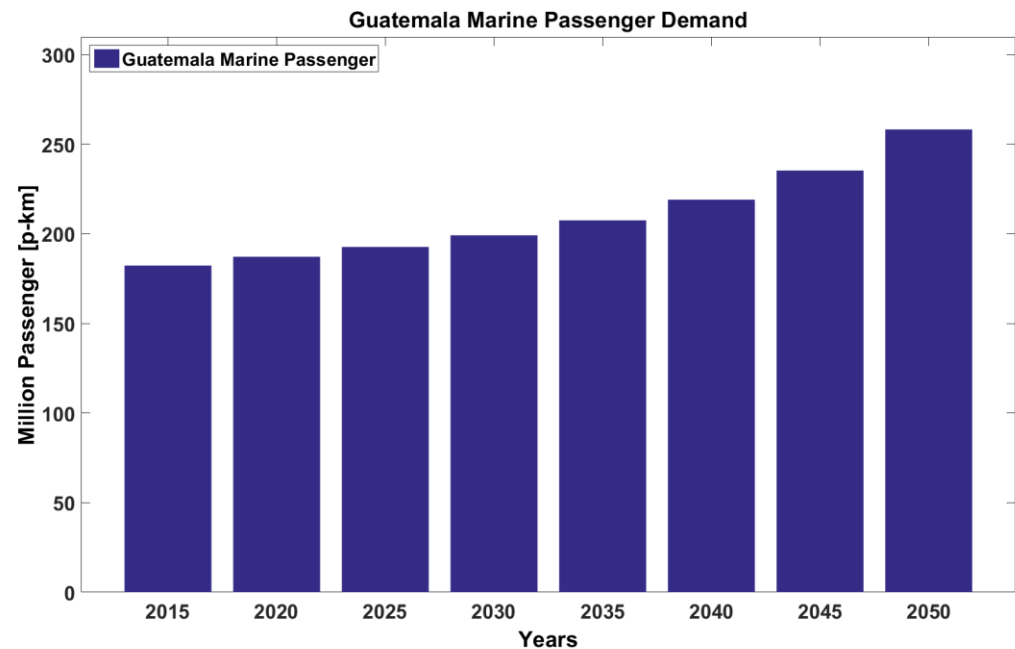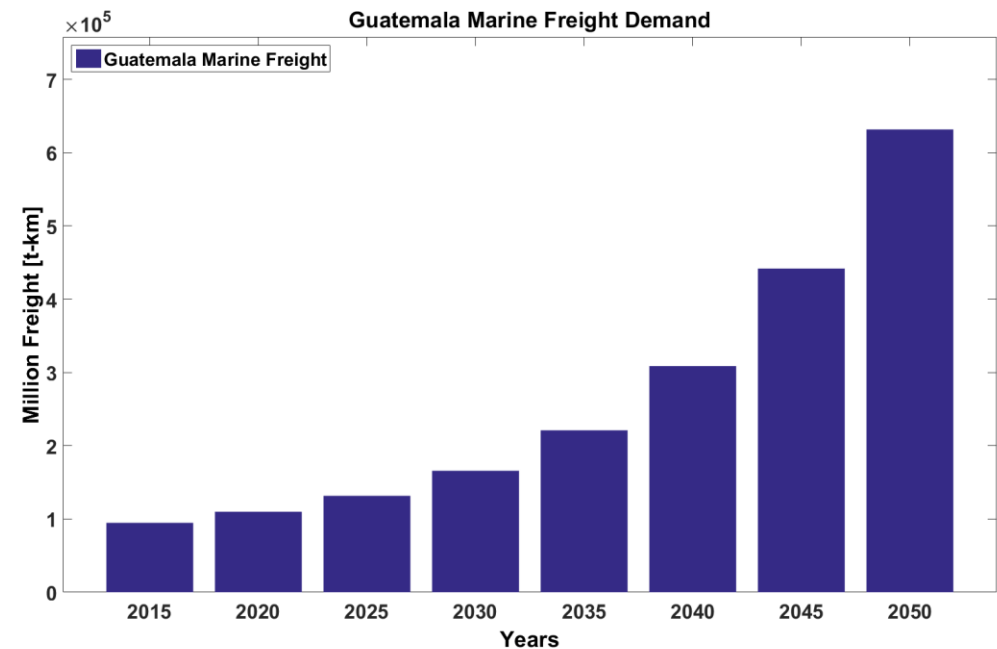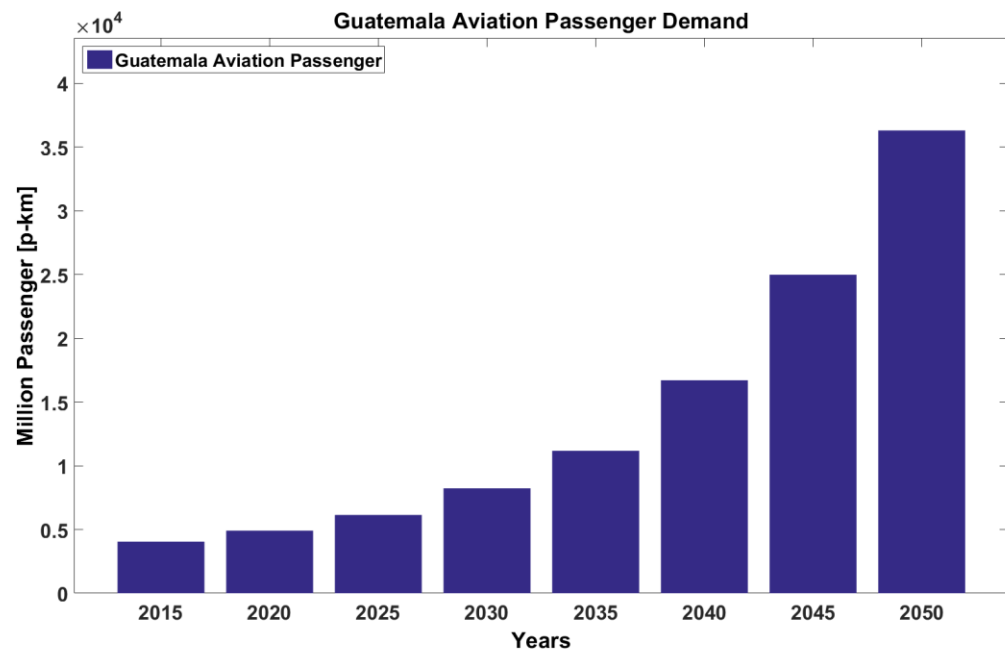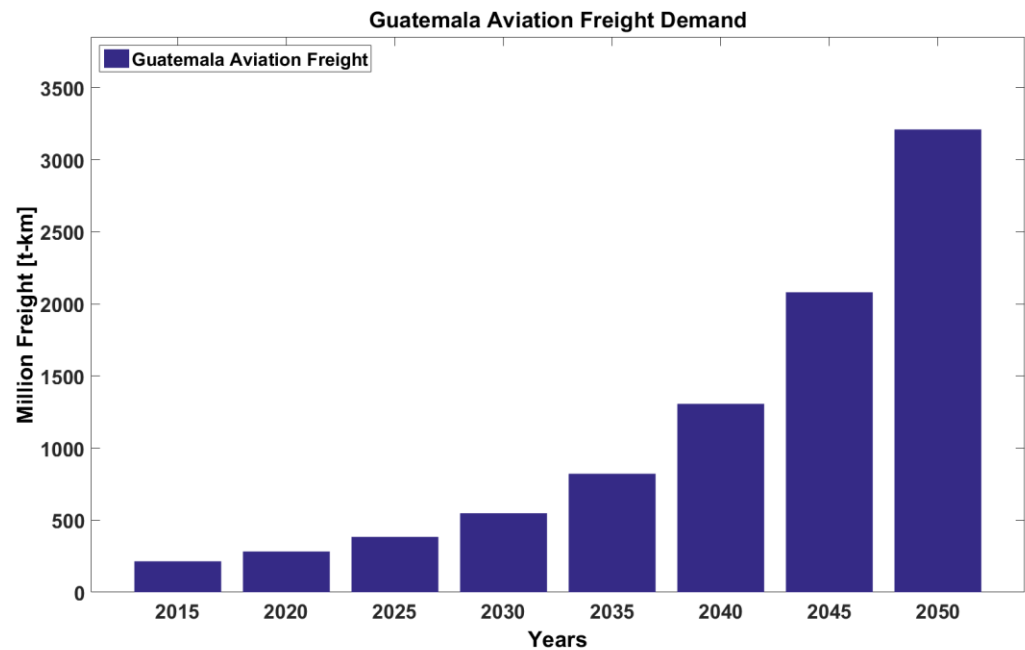

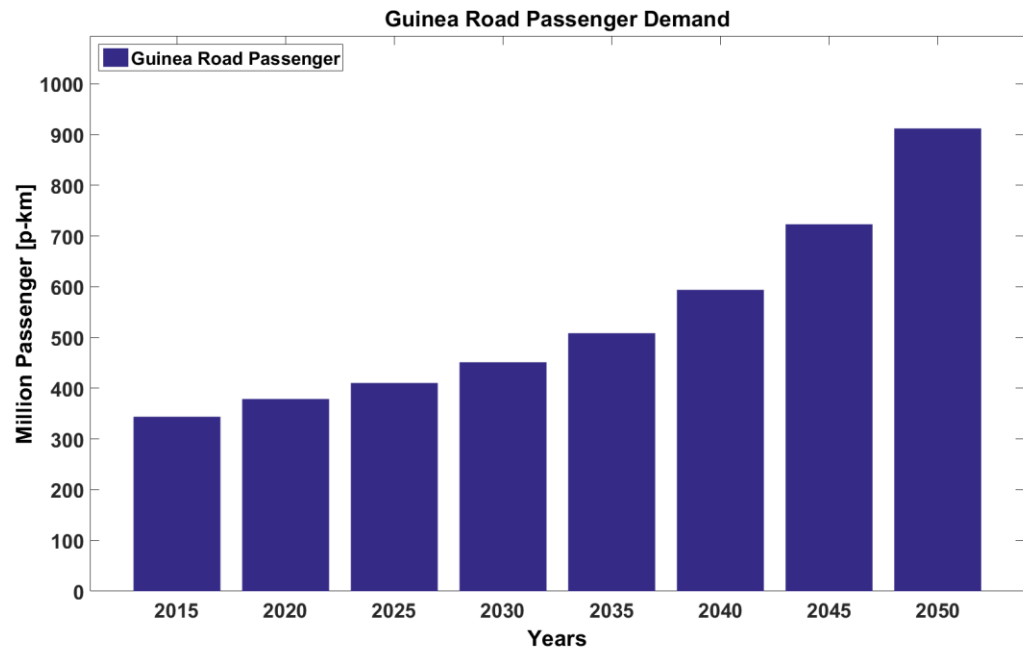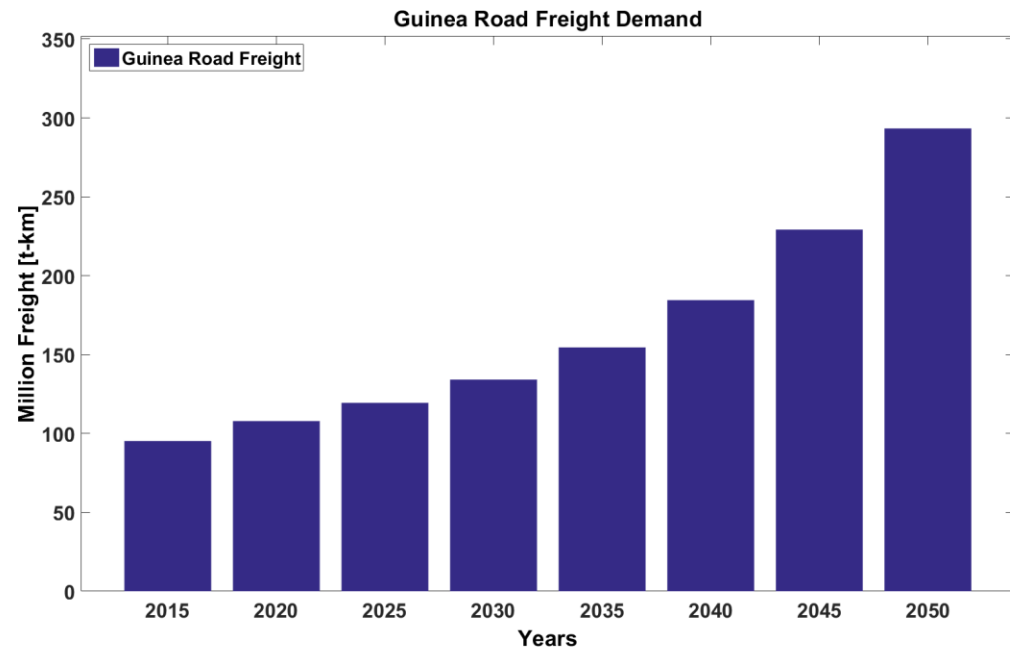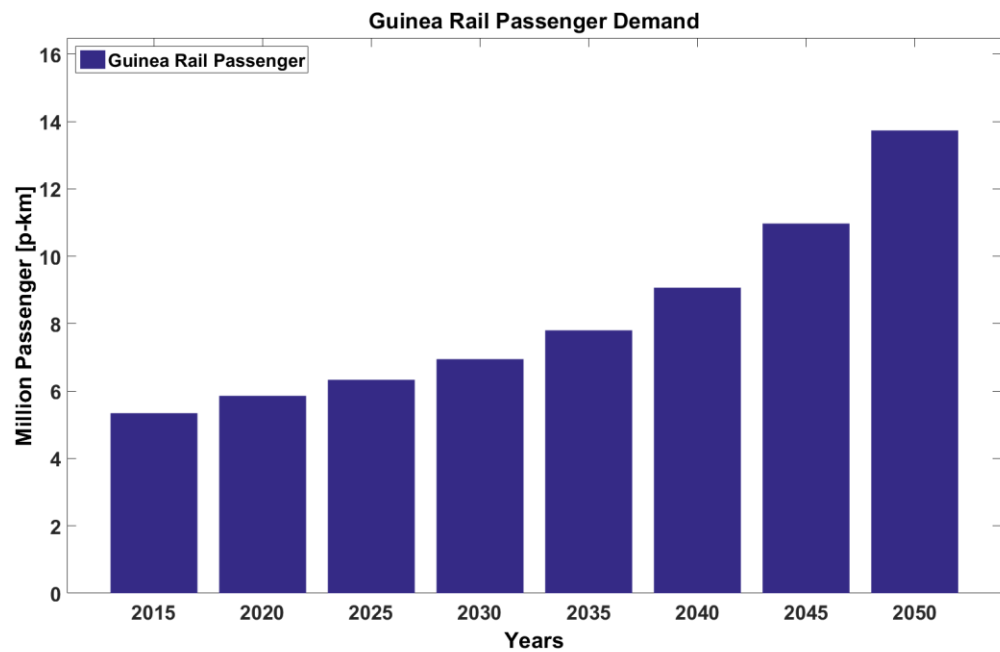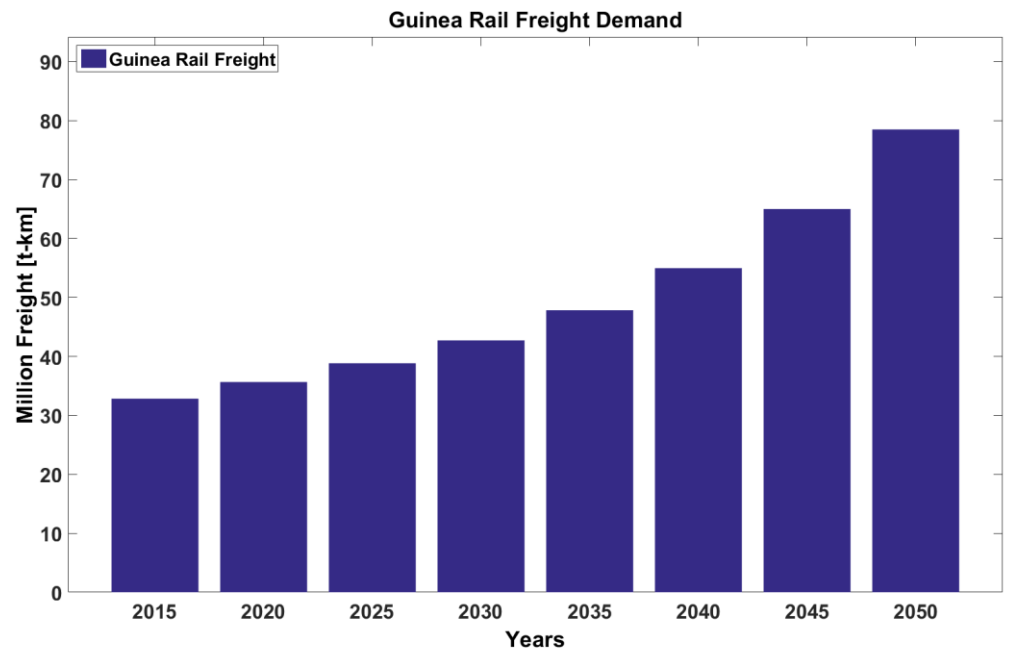

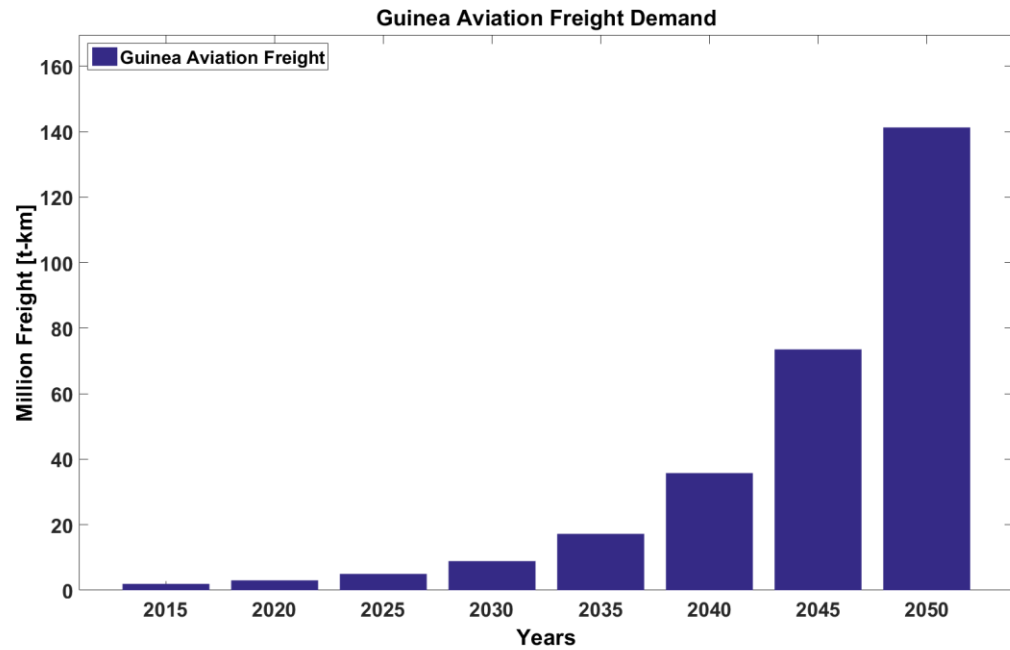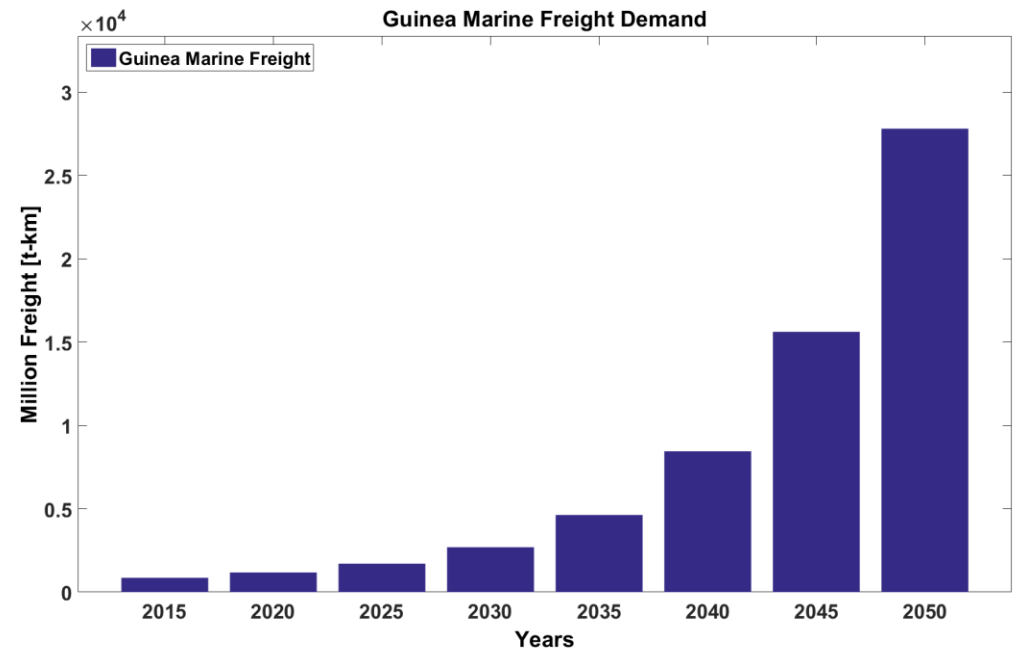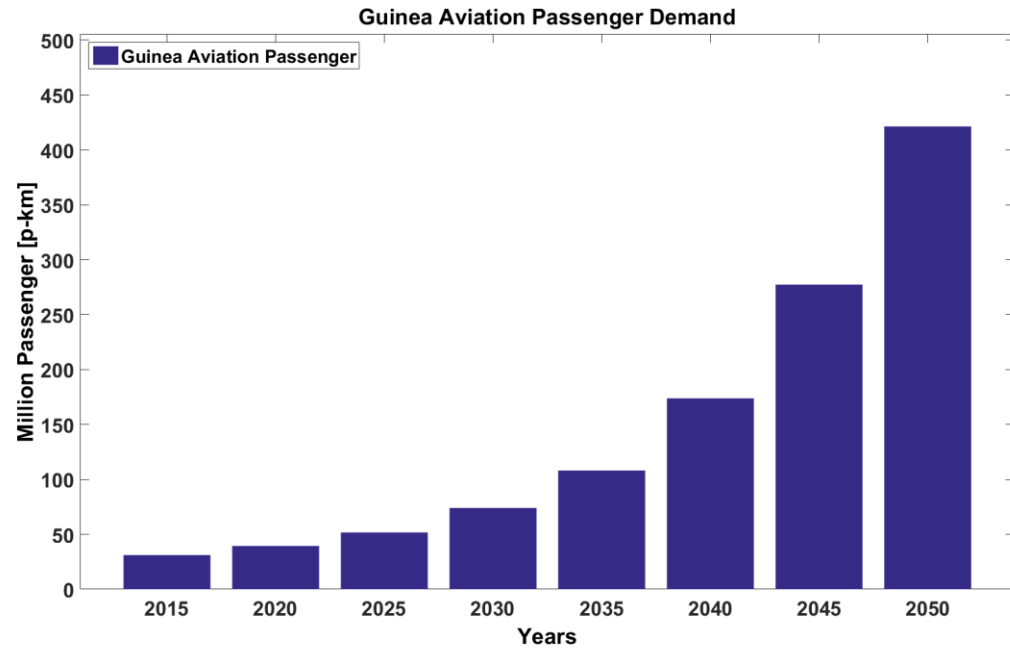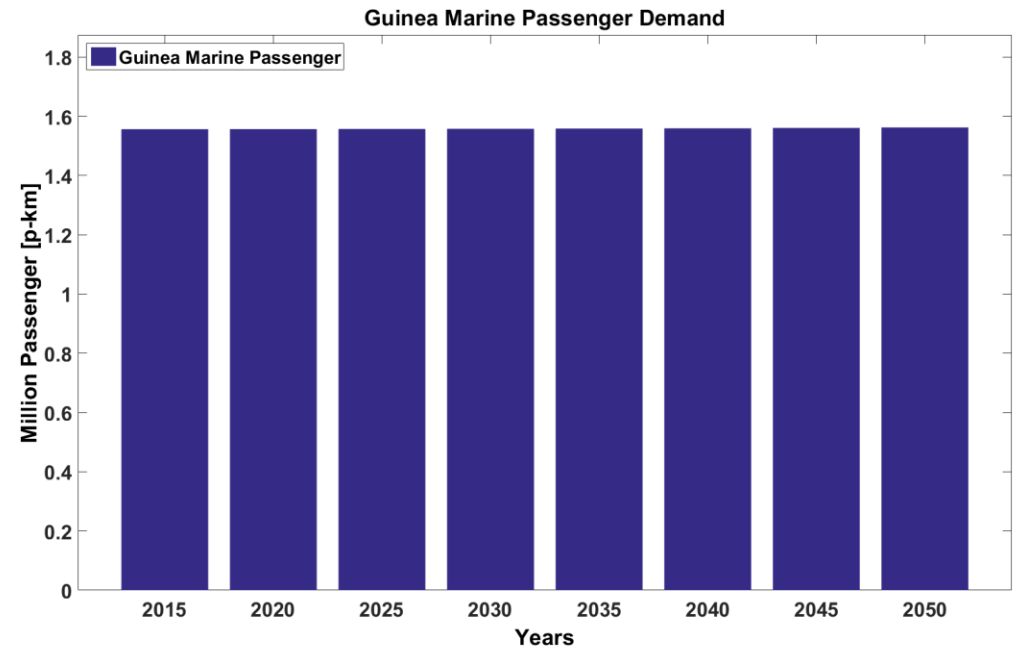

Guinea-Bissau Road Passenger Demand

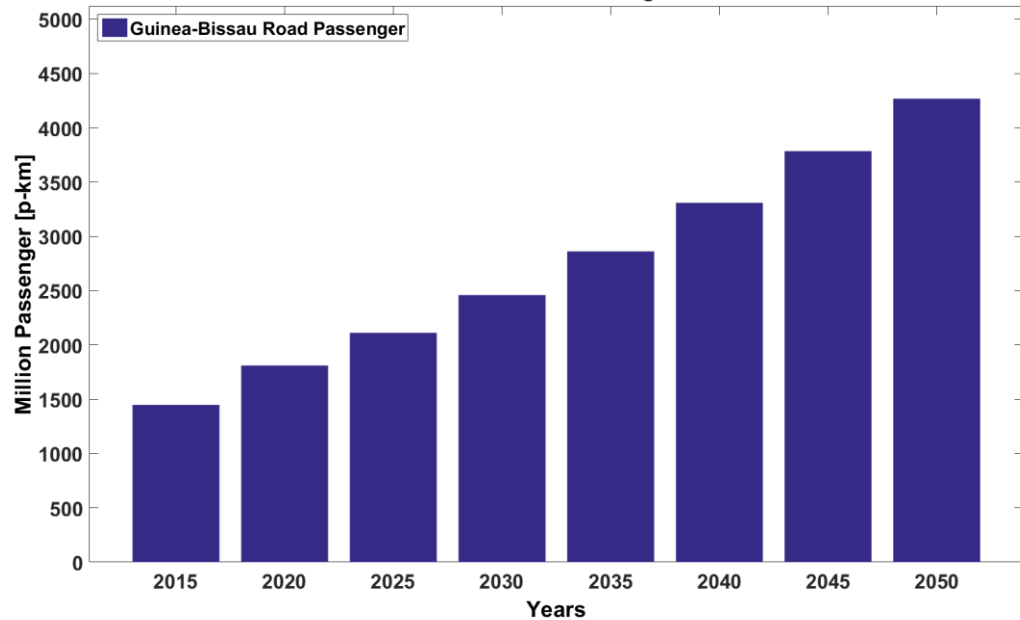

Guinea-Bissau Road Freight Demand

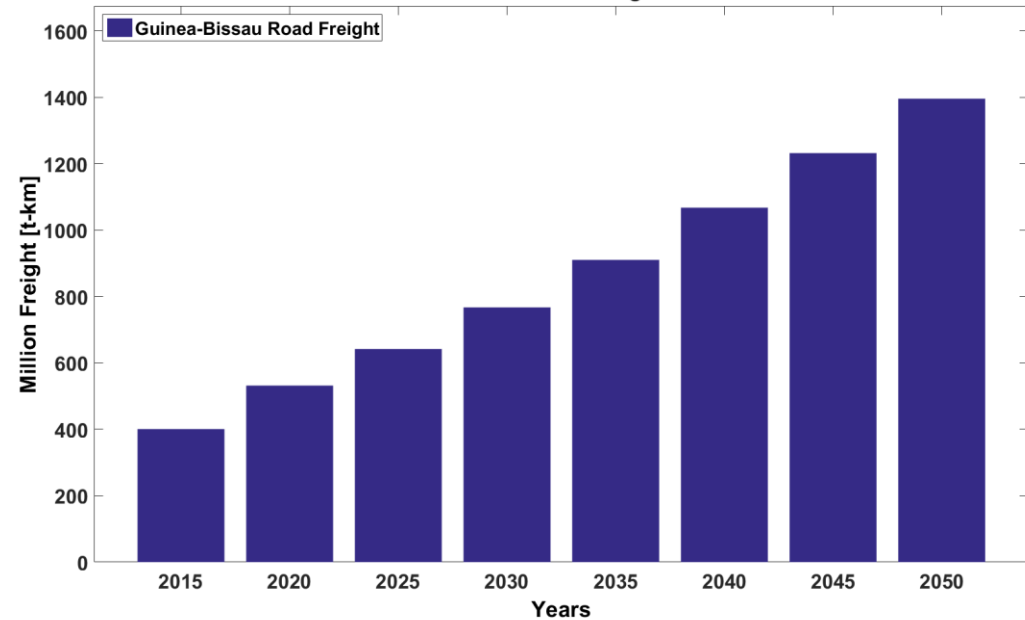

Guinea-Bissau Rail Passenger Demand

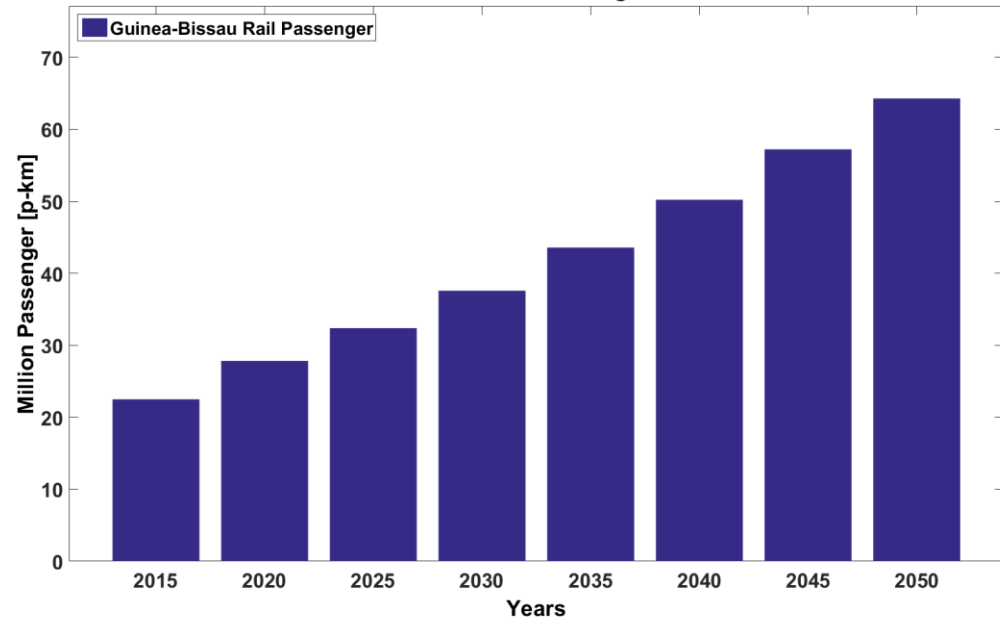

Guinea-Bissau Rail Freight Demand

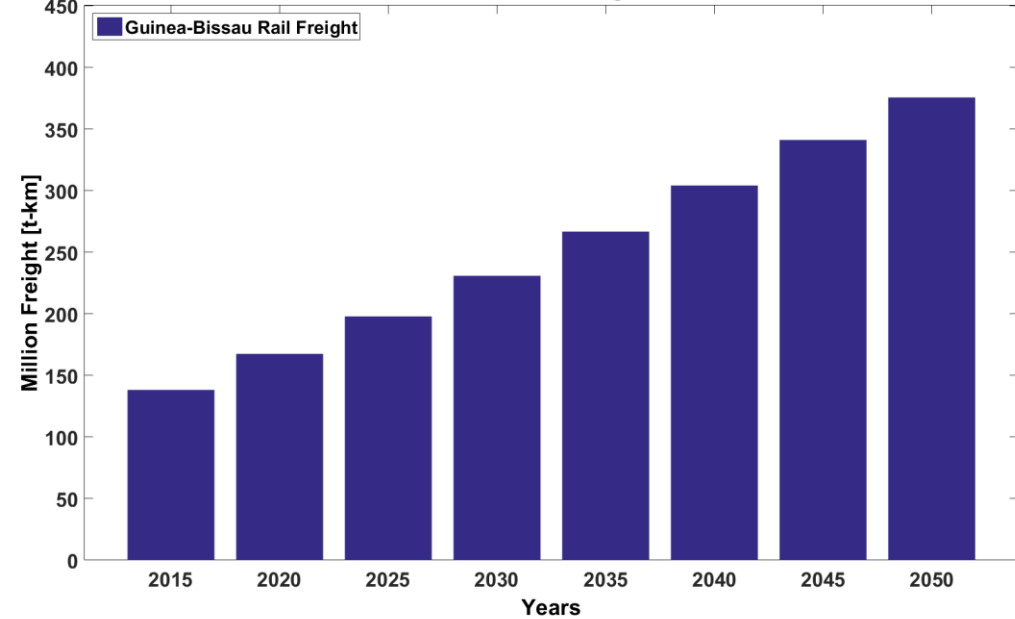

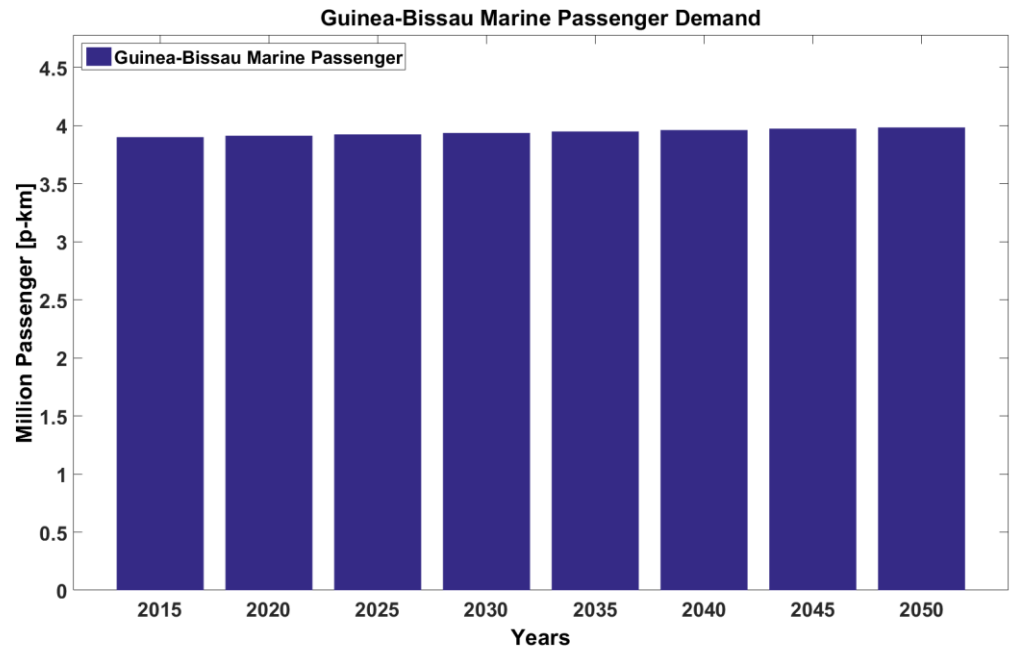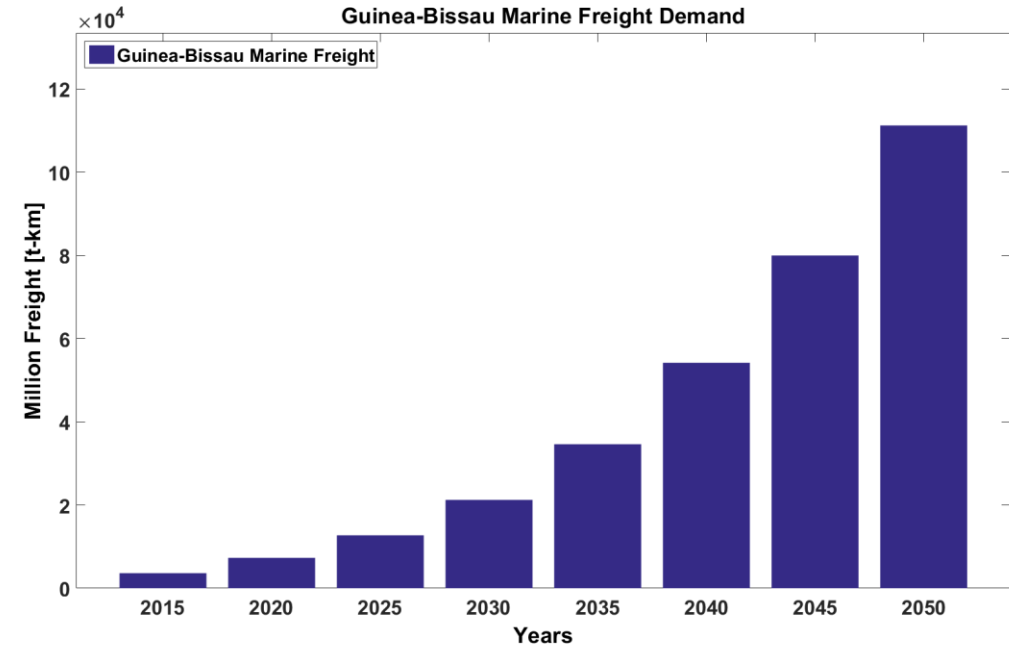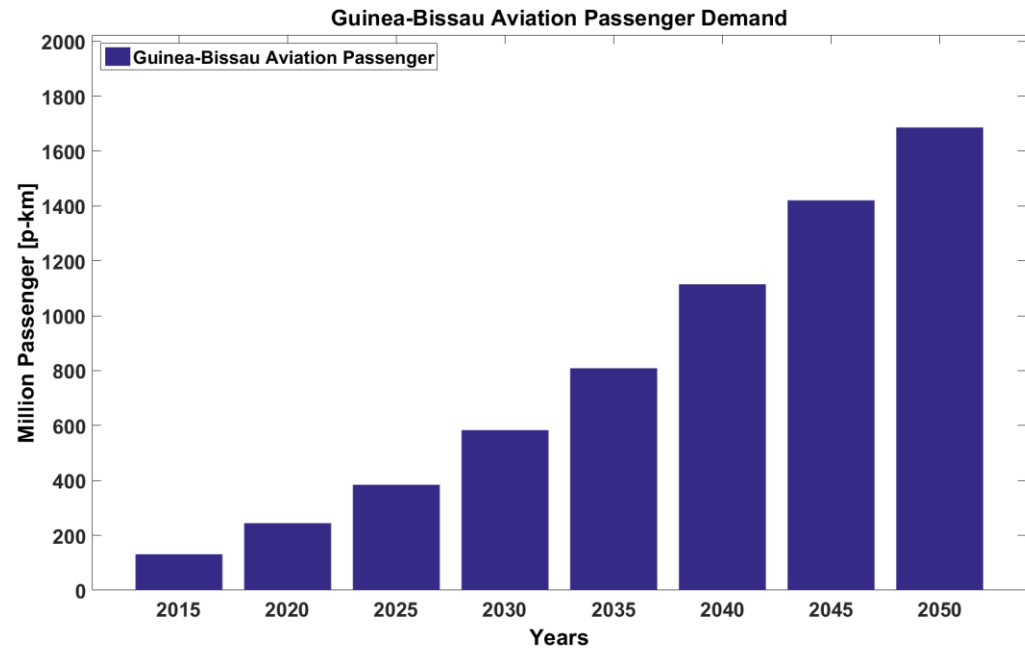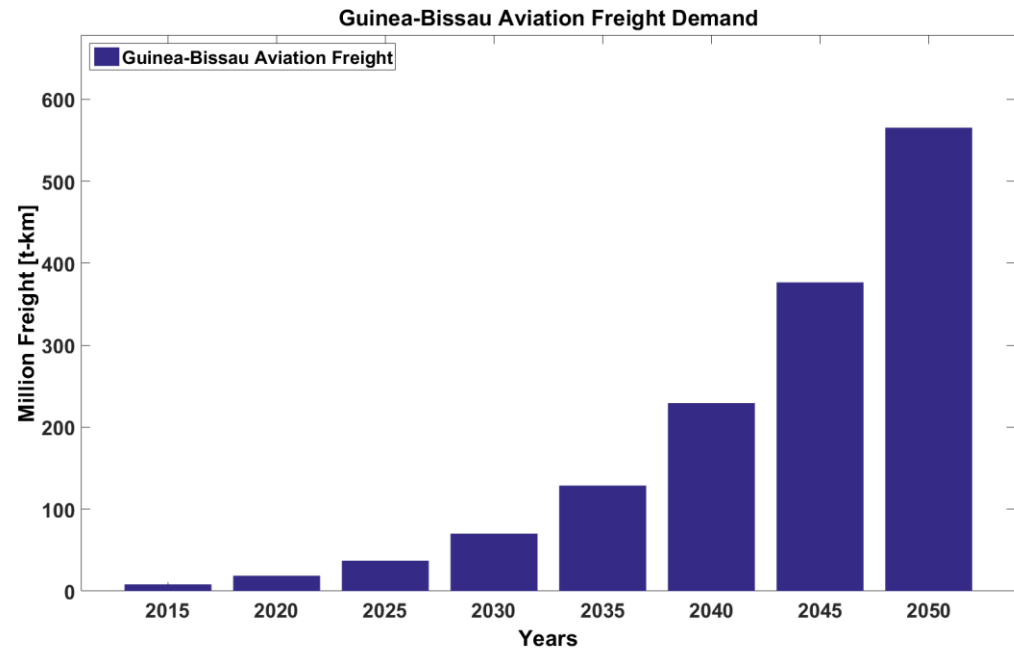

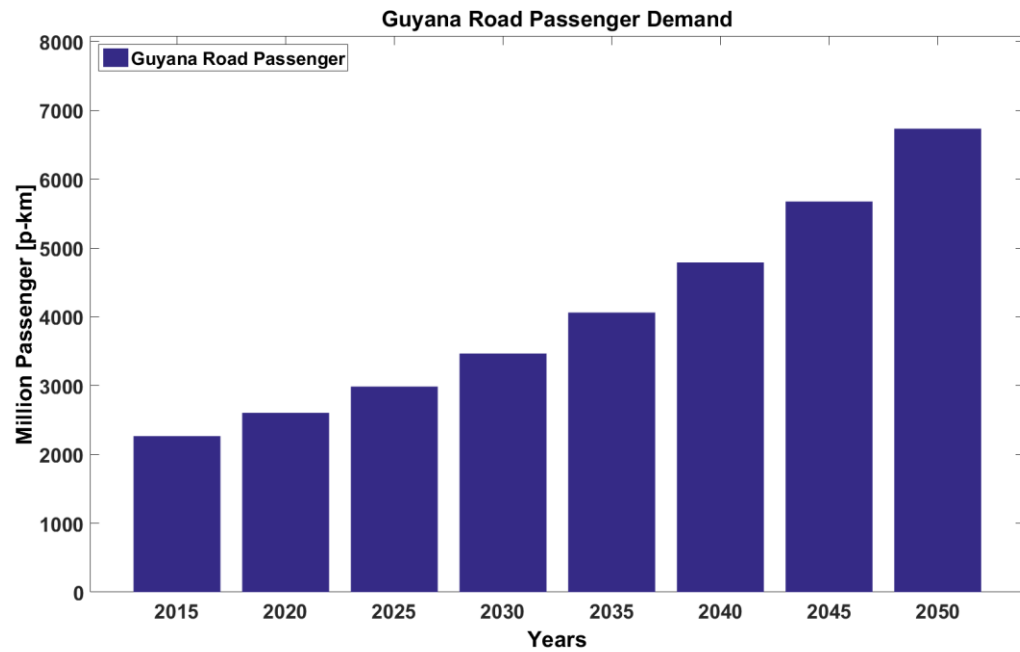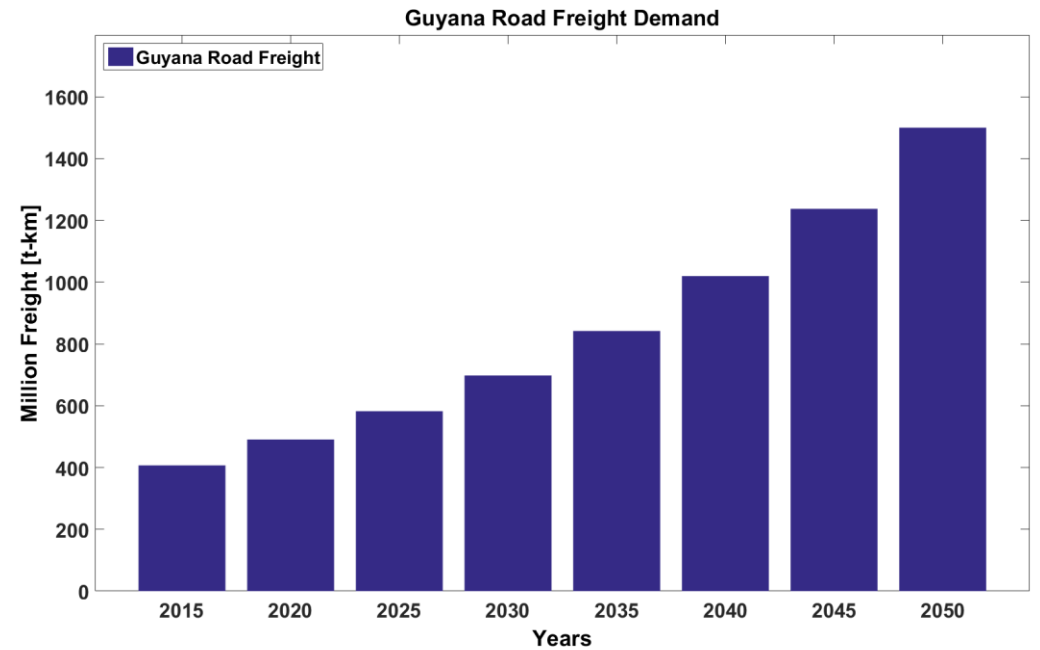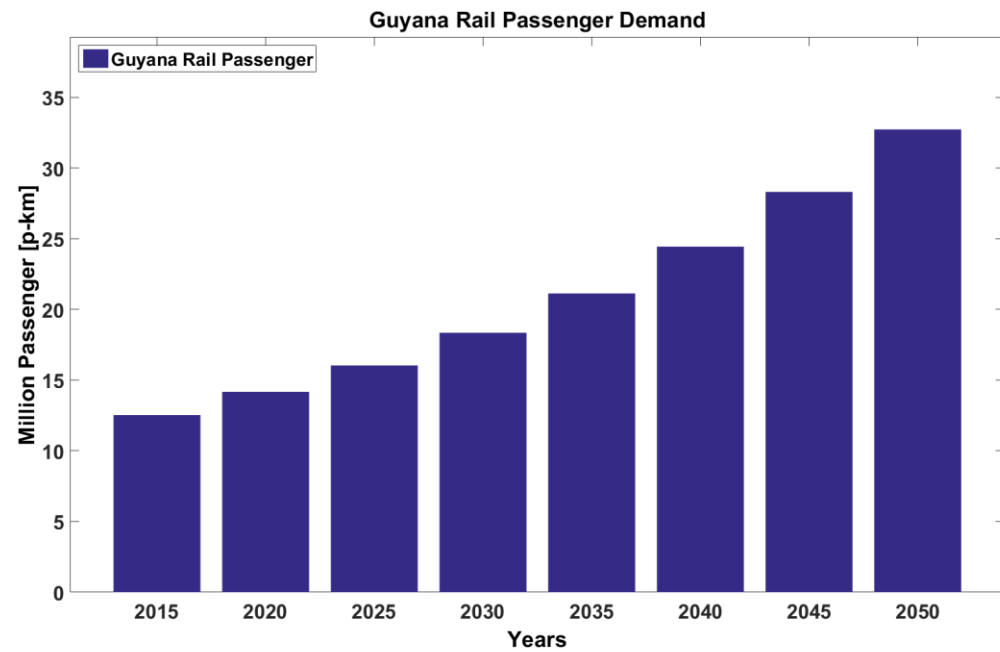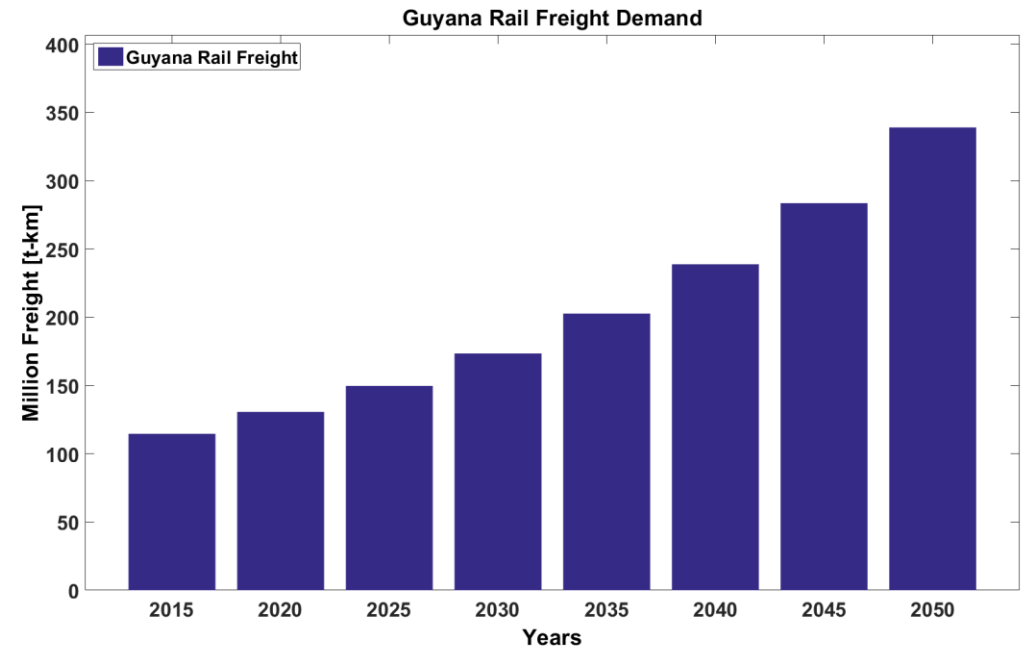

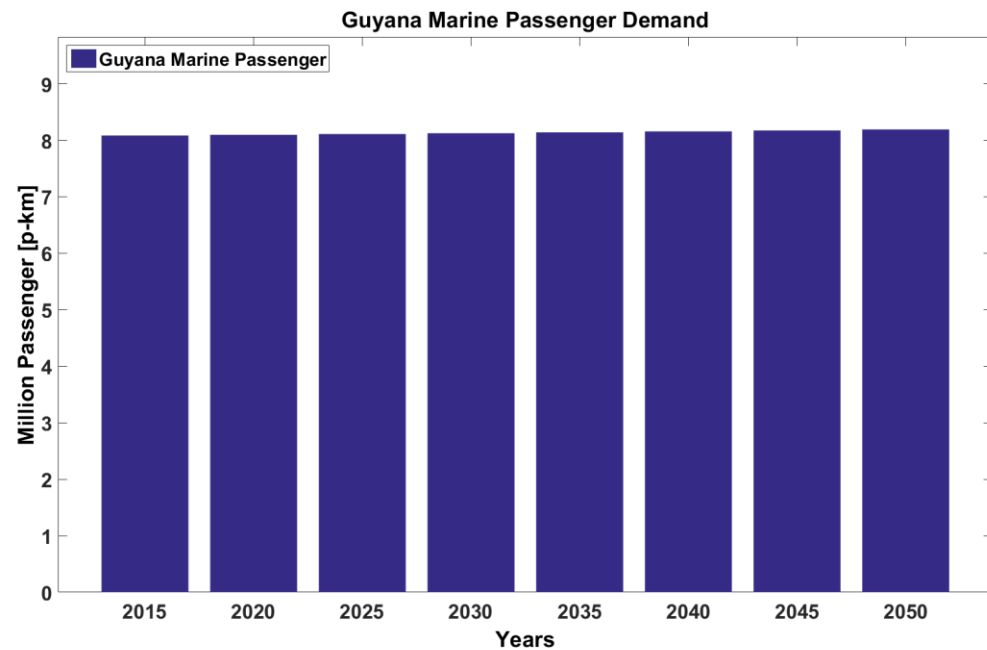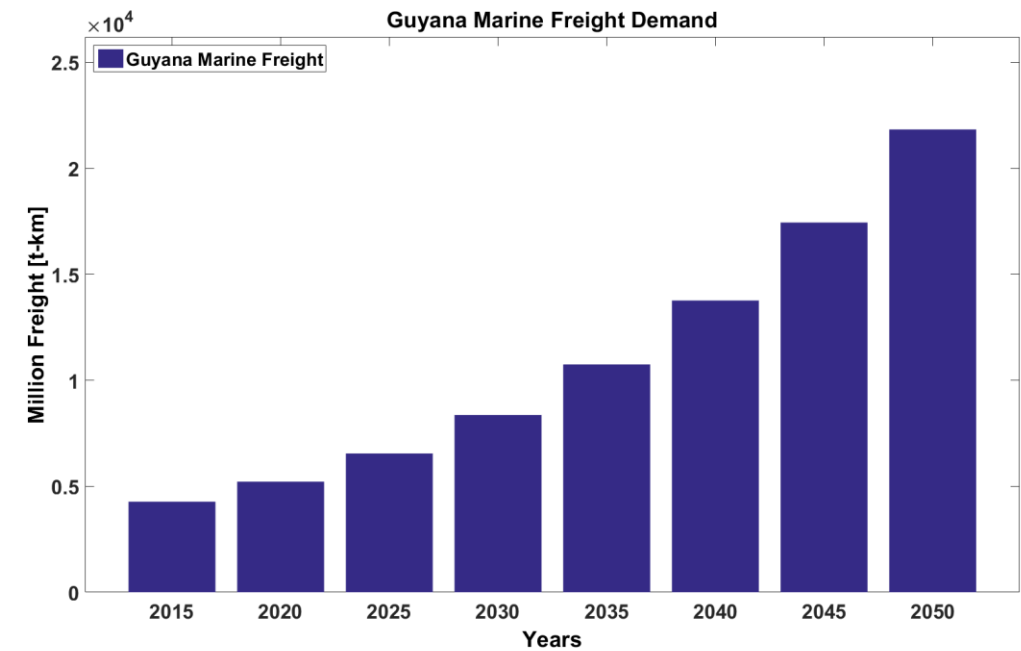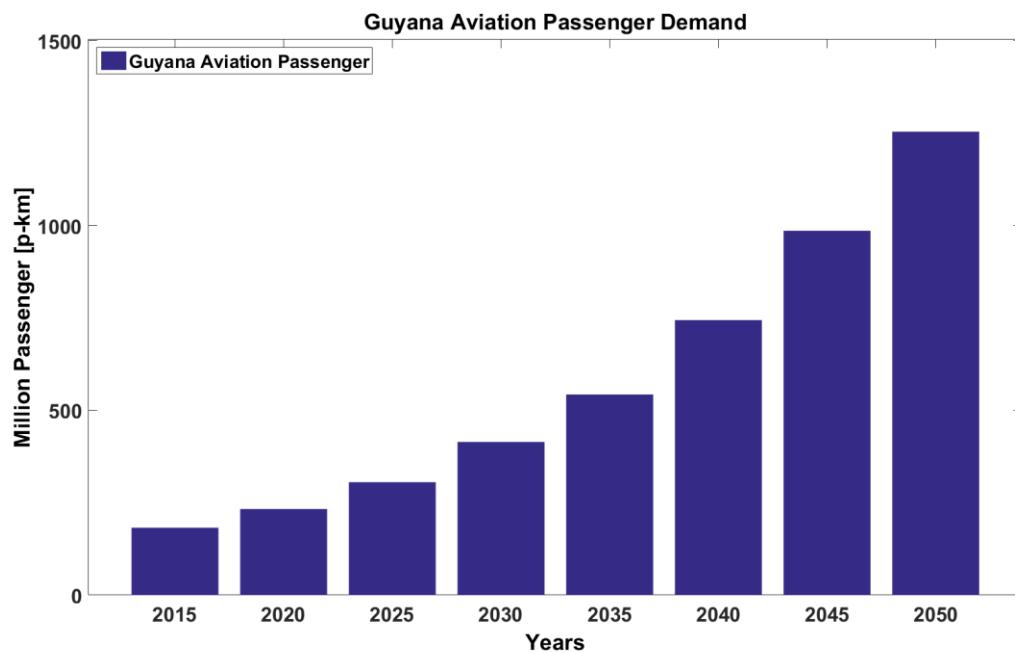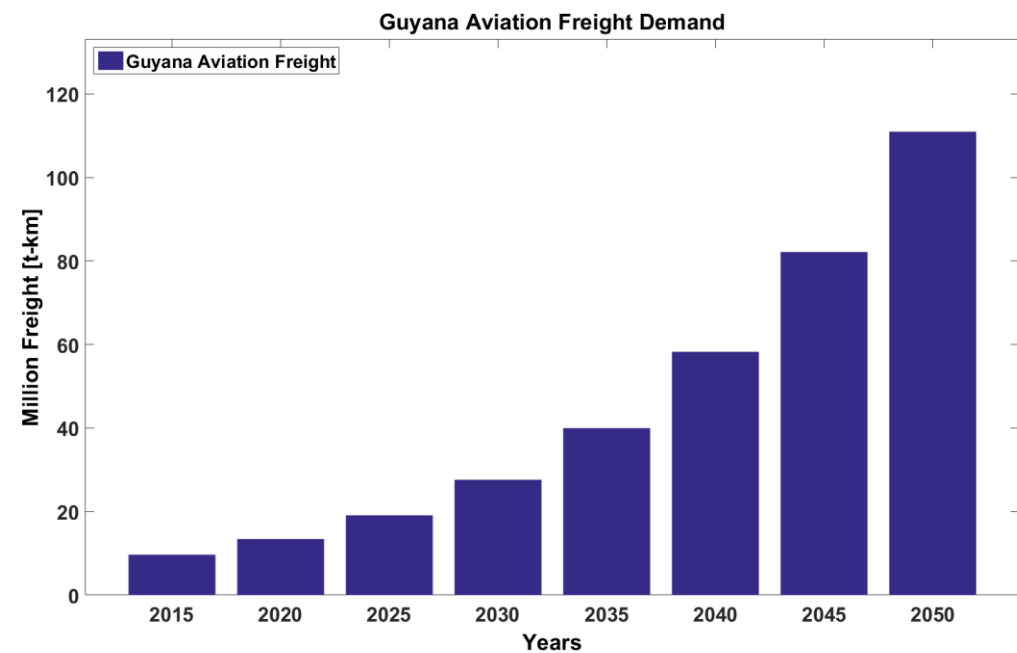

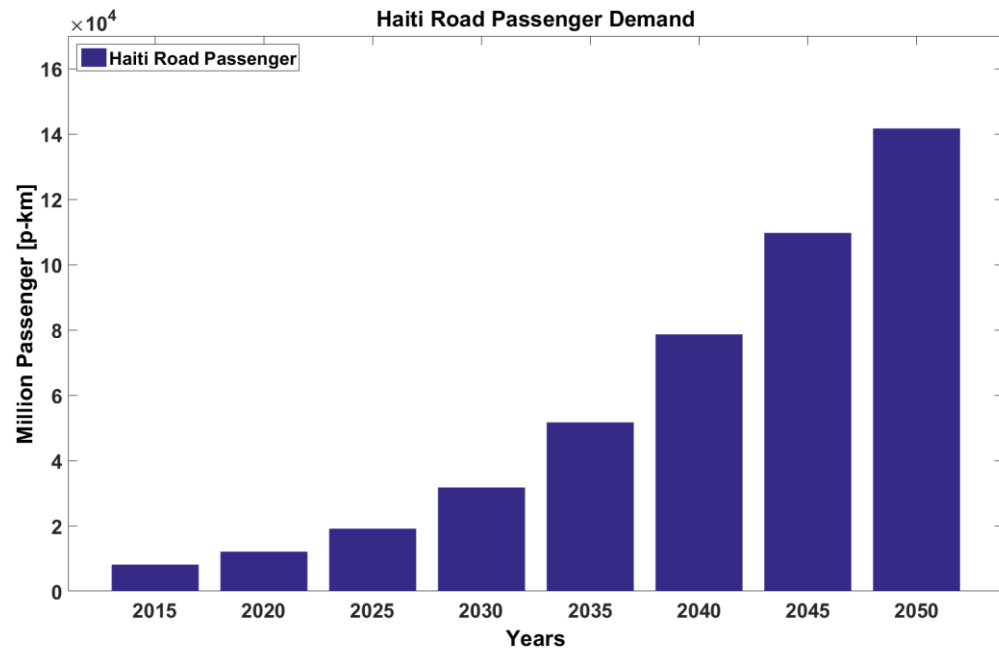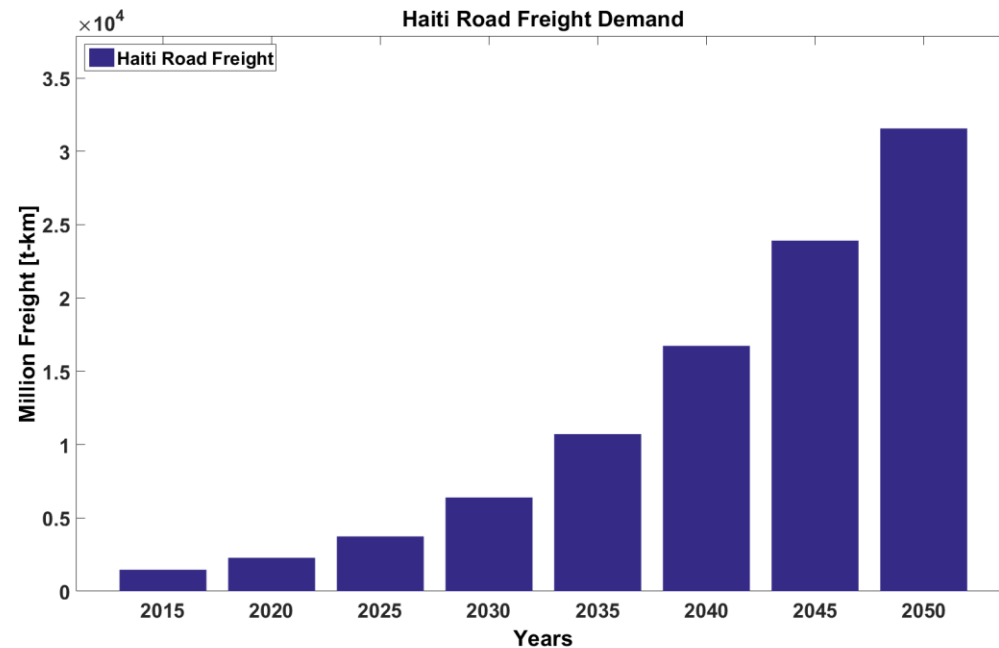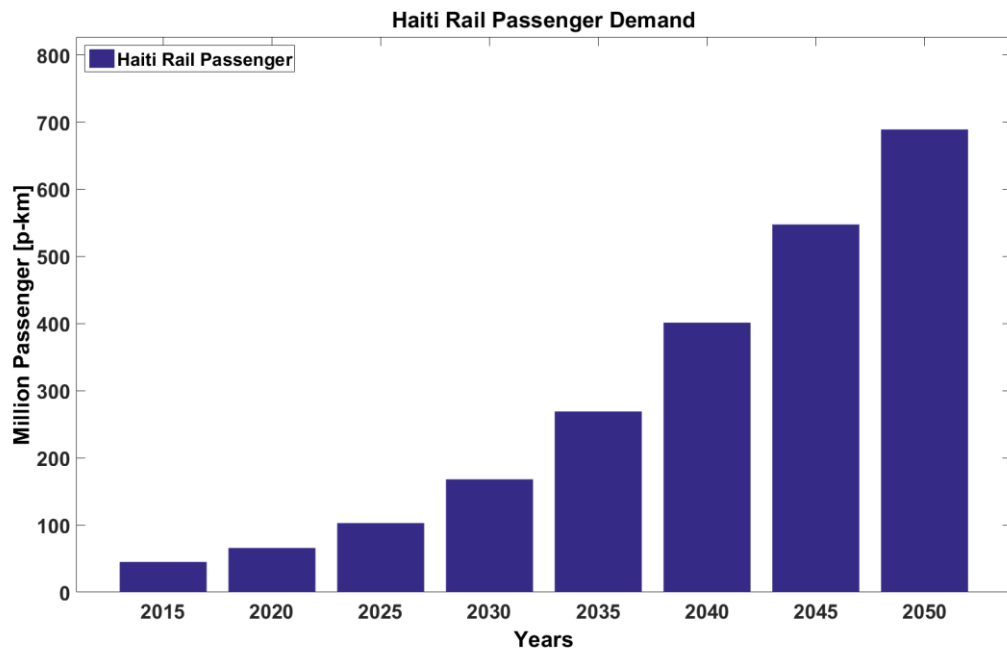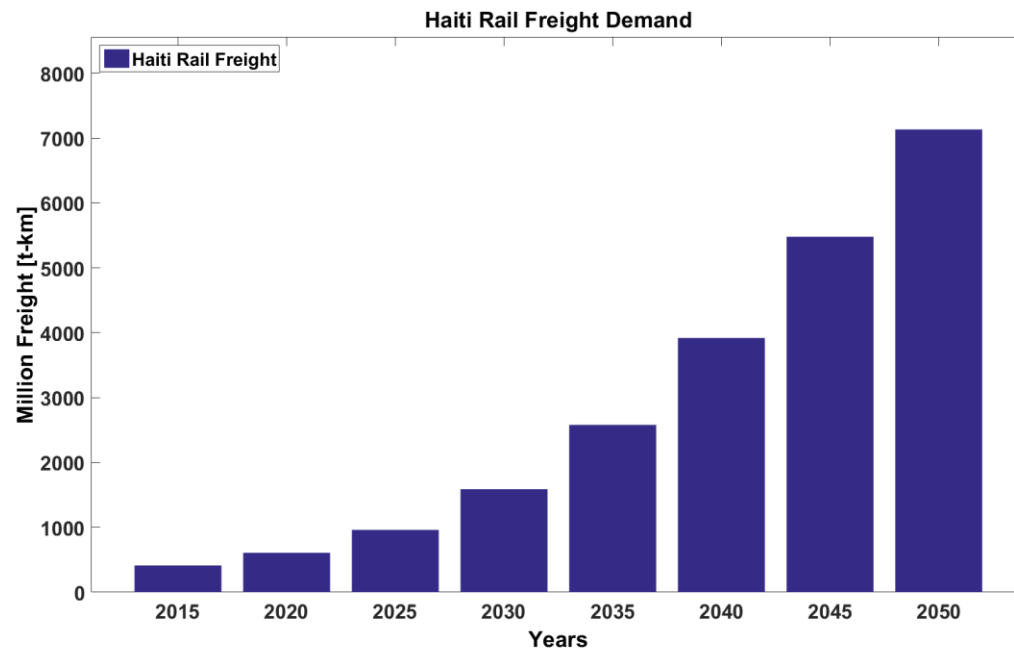

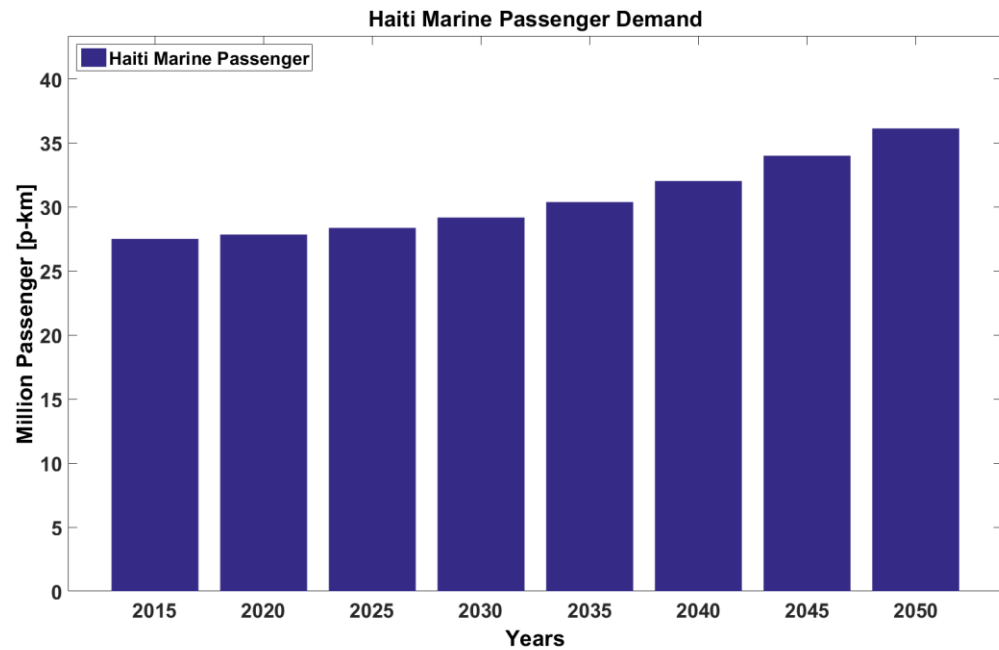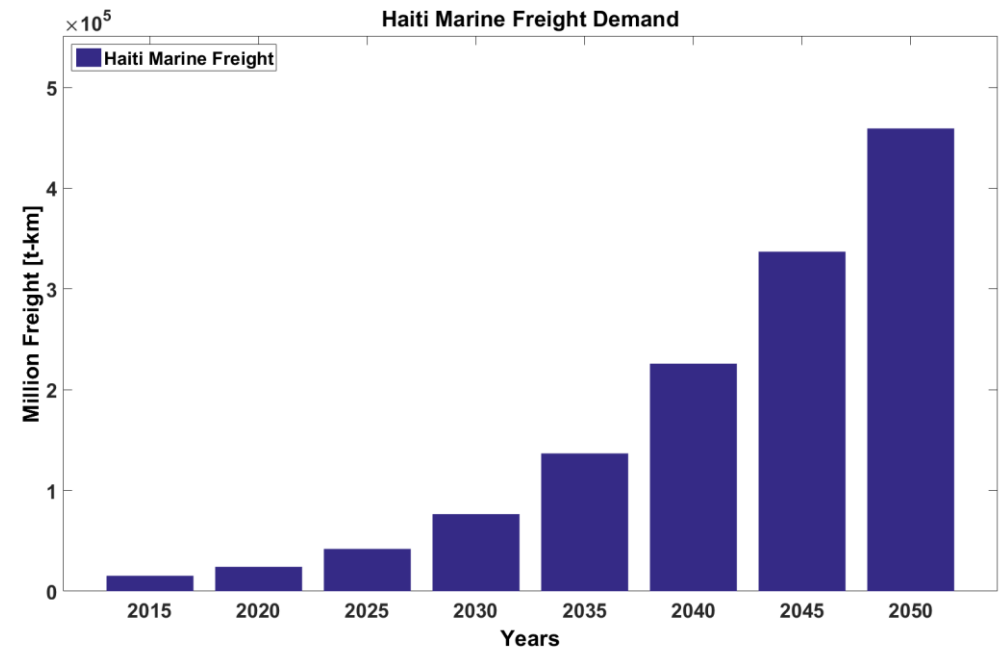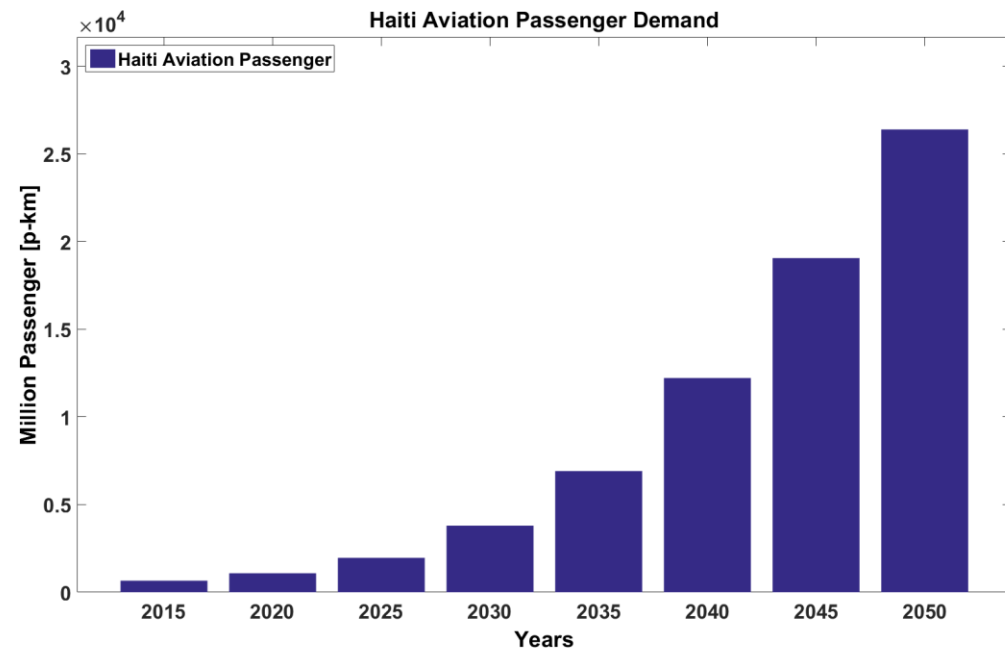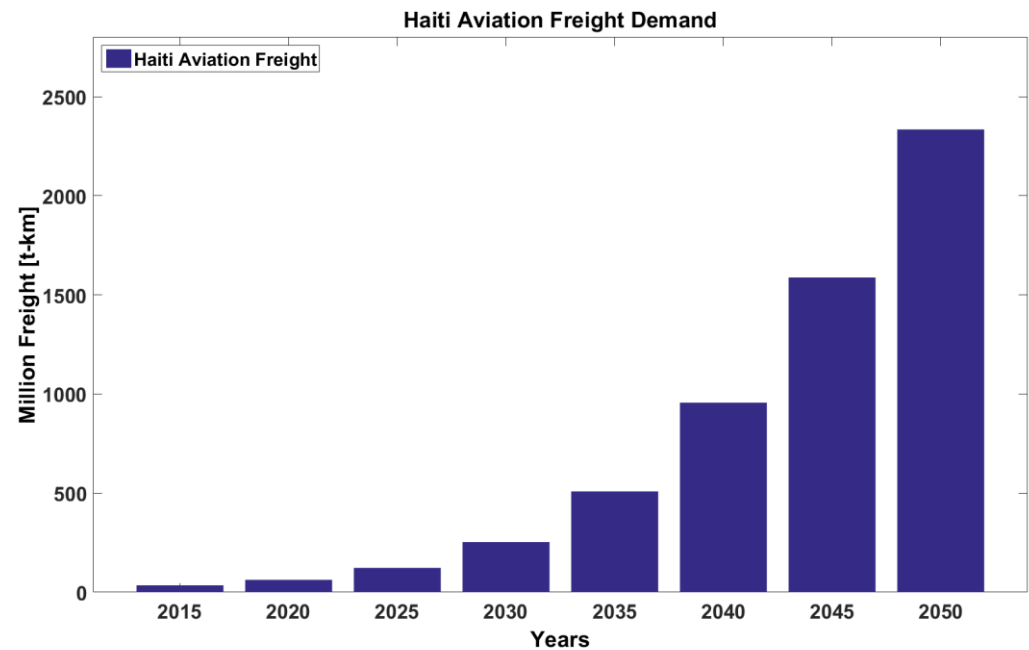

Supplement: s1 [file s1]
