# Supplementary material
Source: MDPI journal article supplement (https://www.mdpi.com/1996-1073/12/20/3870)

## **Supplementary Material**

# **Global transportation demand development with impacts on the energy demand and greenhouse gas emissions in a climate constrained world**

**Siavash Khalili \*<sup>1</sup>, Eetu Rantanen<sup>1</sup>, Dmitrii Bogdanov<sup>1</sup>, Christian Breyer<sup>1</sup>**

**Transportation demand diagrams  
Global, Major Regions, Countries**

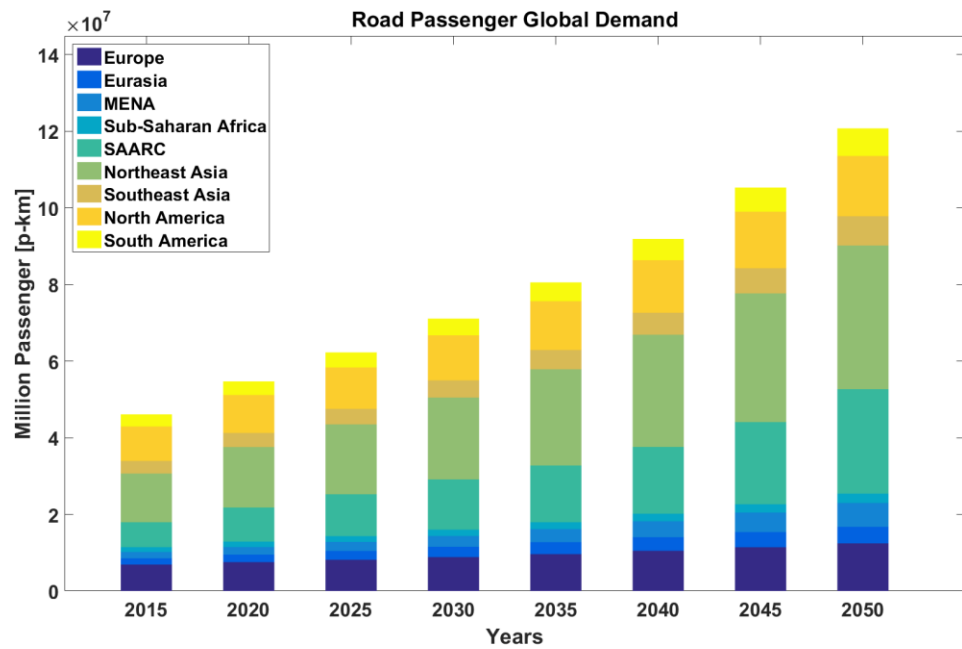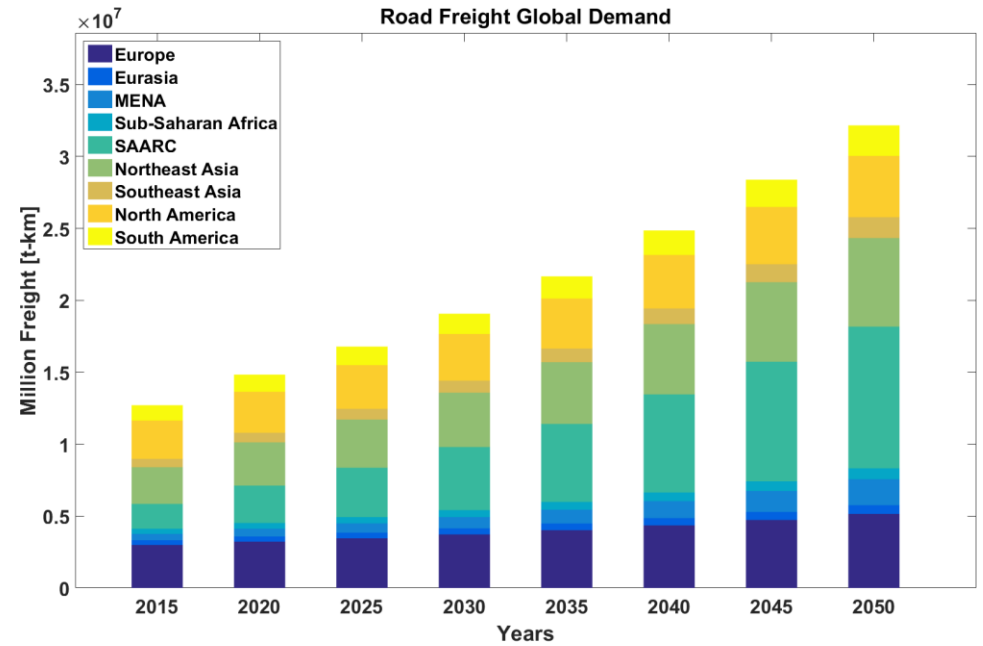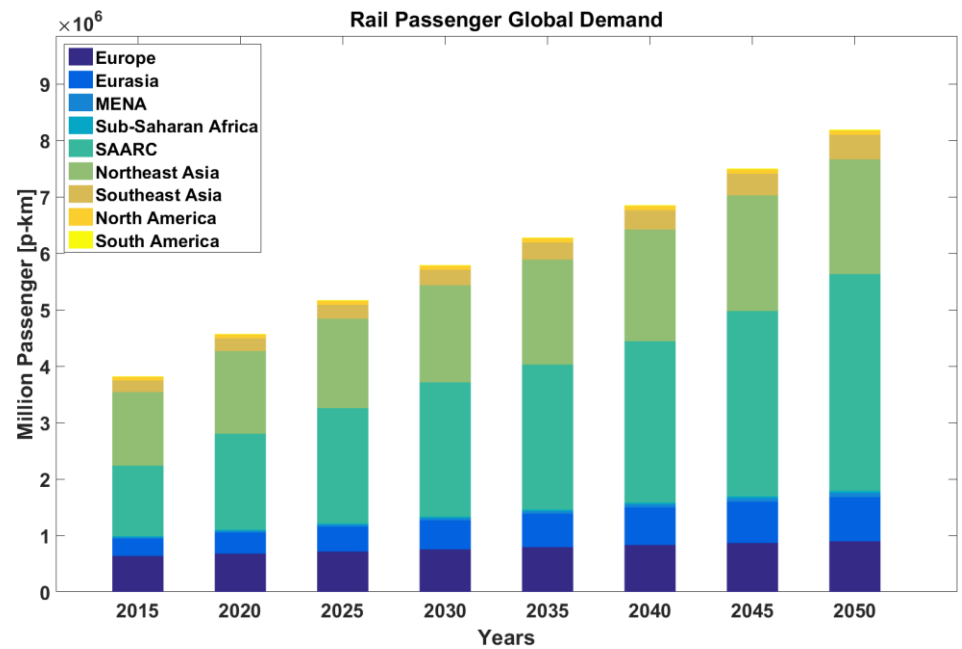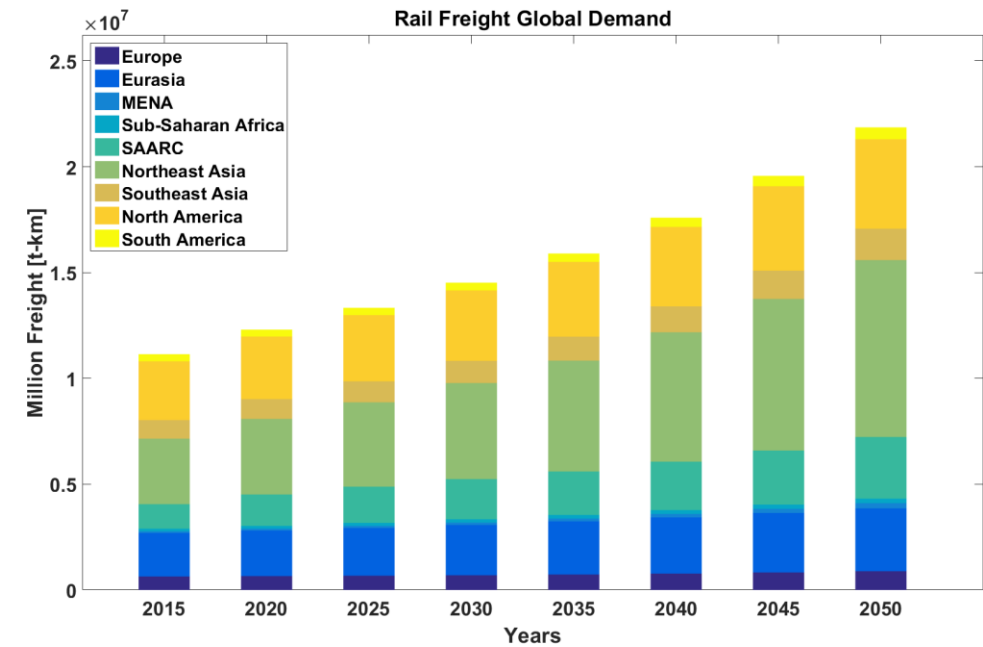

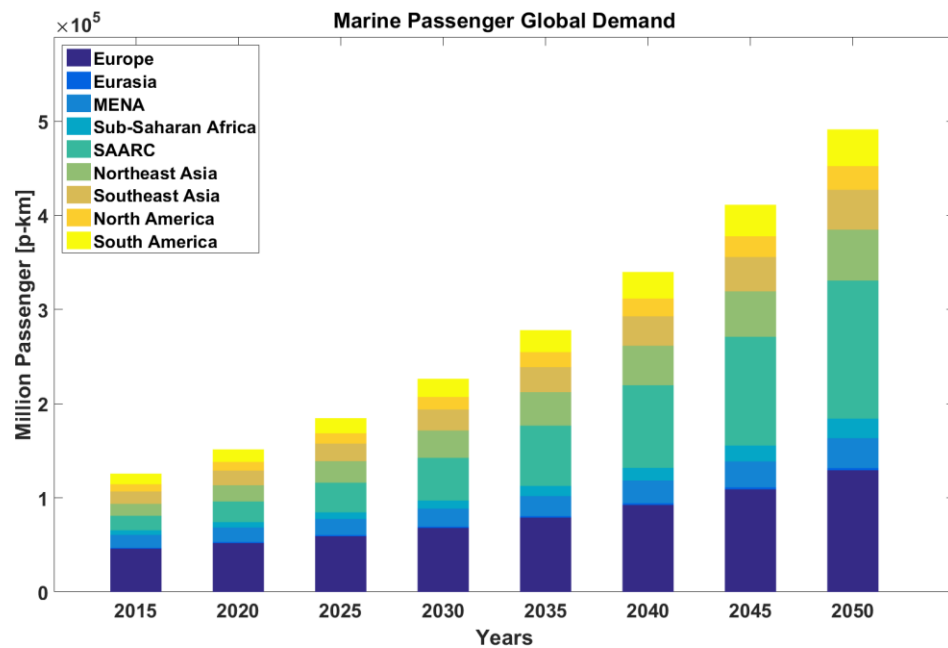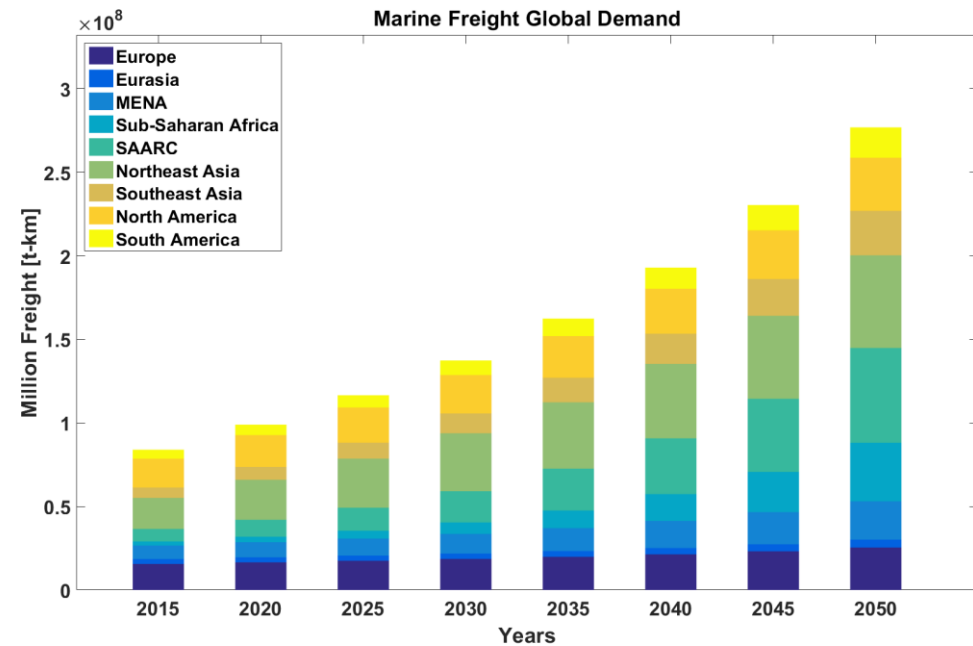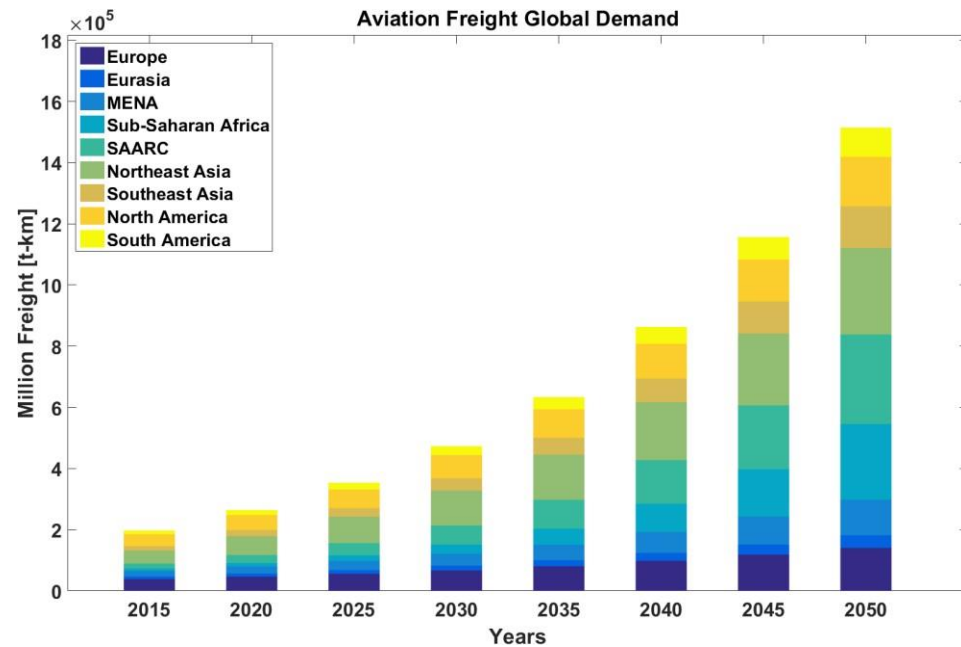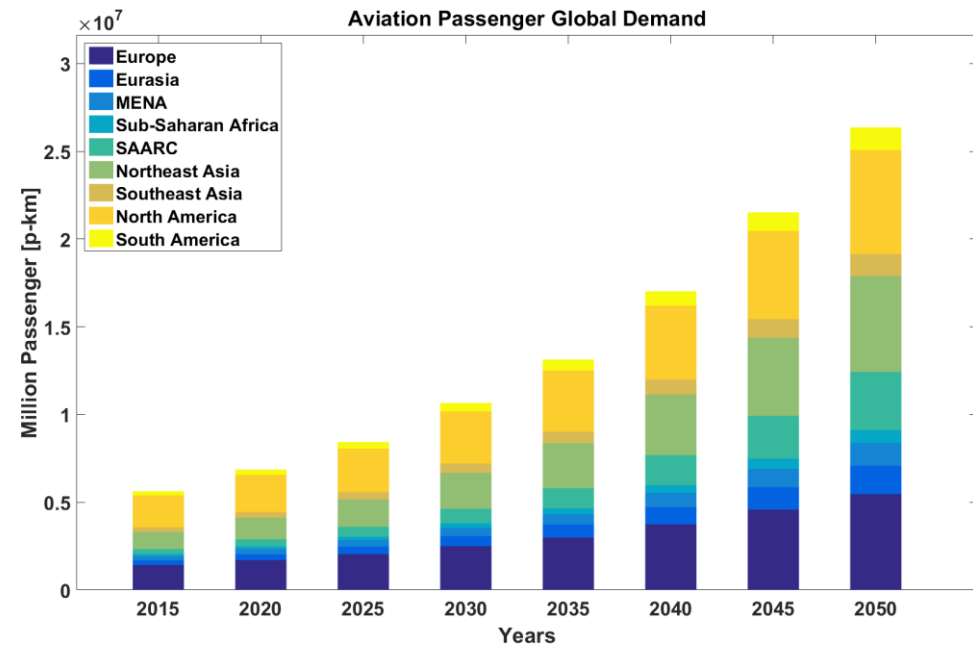

# Major Regions



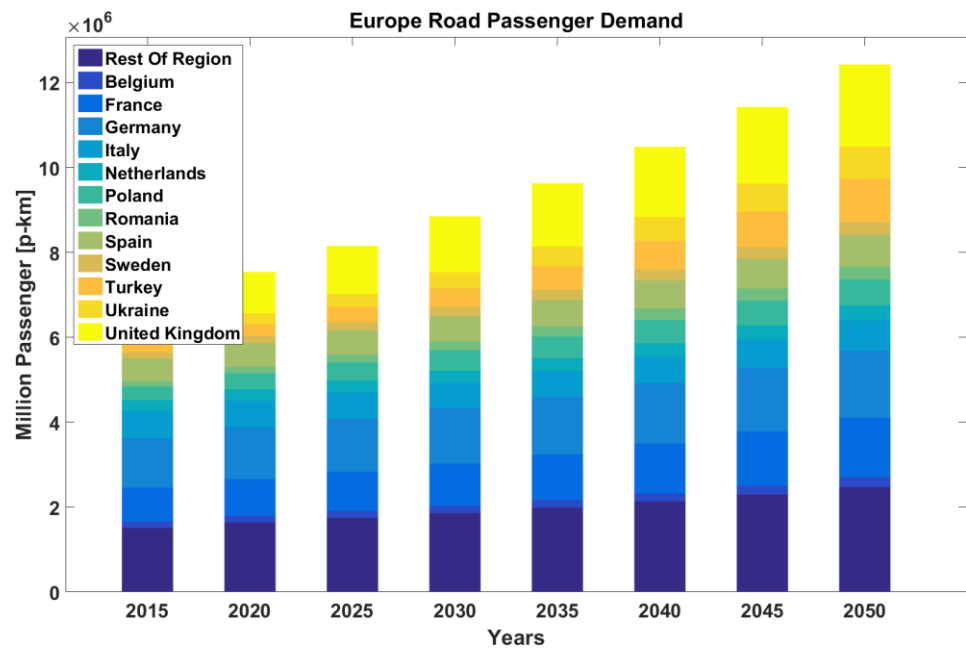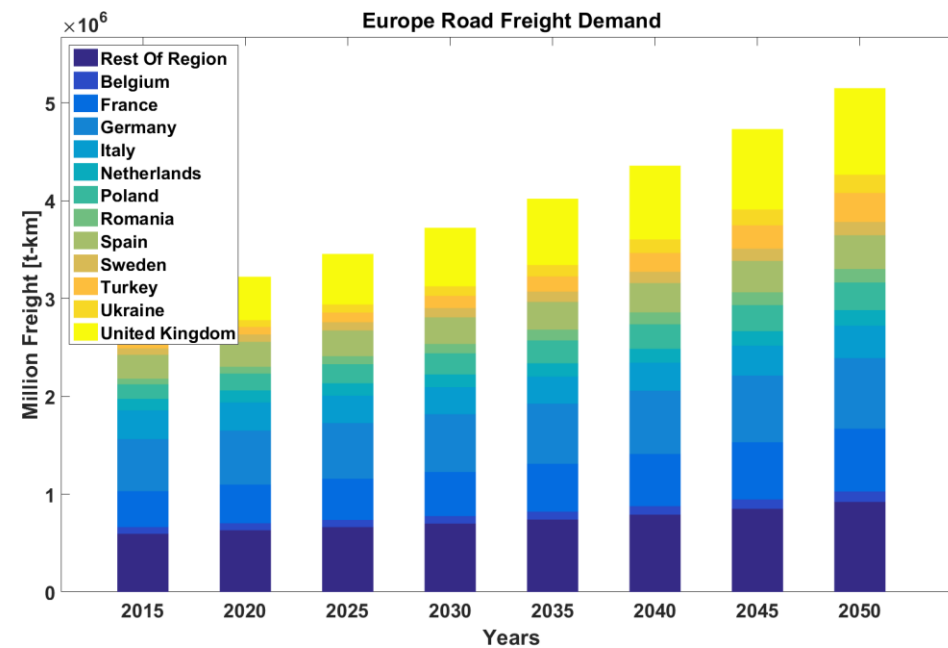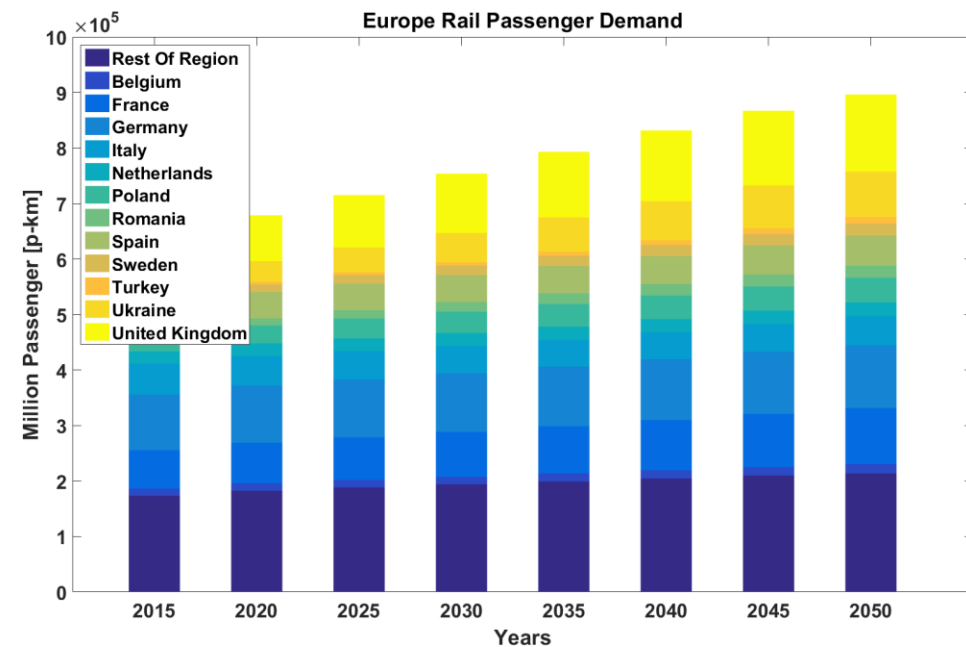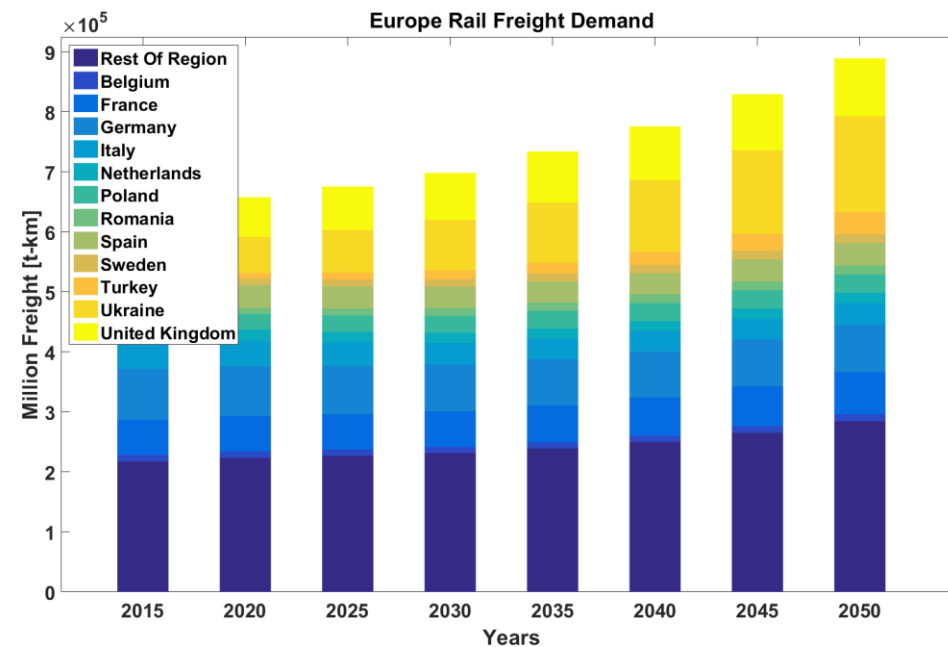

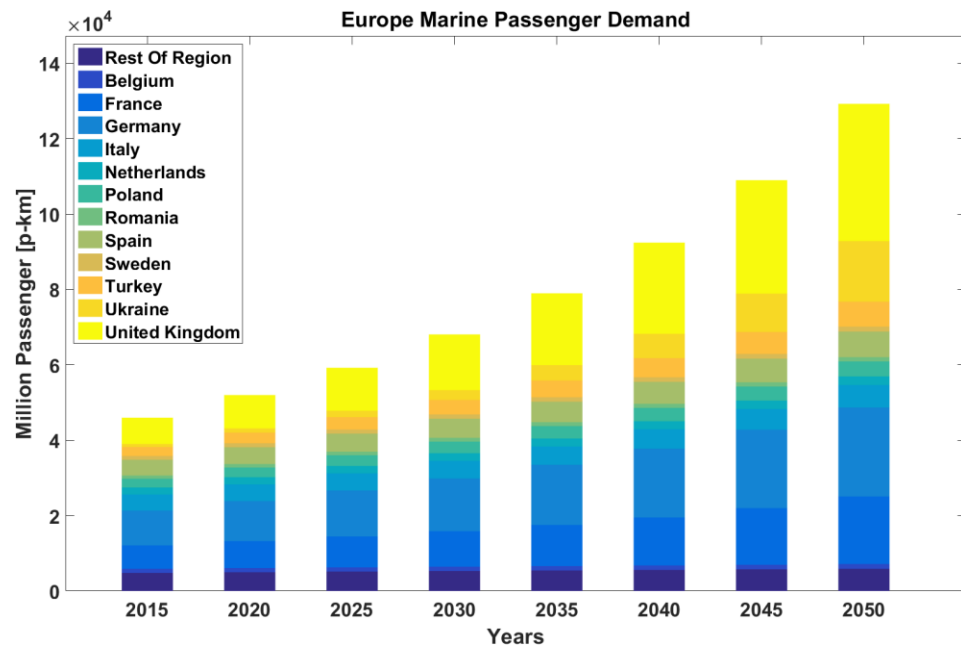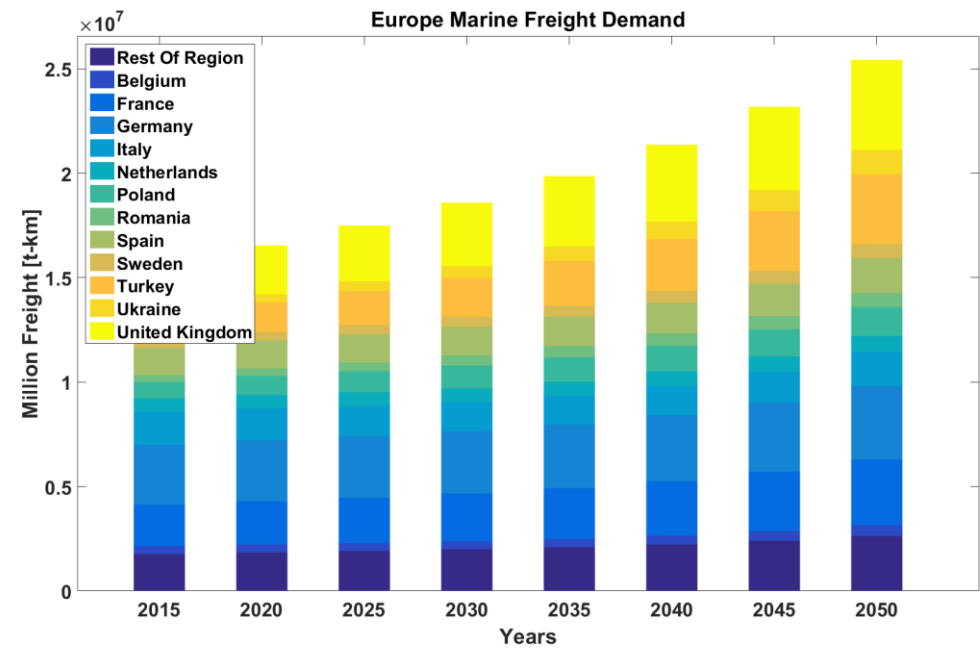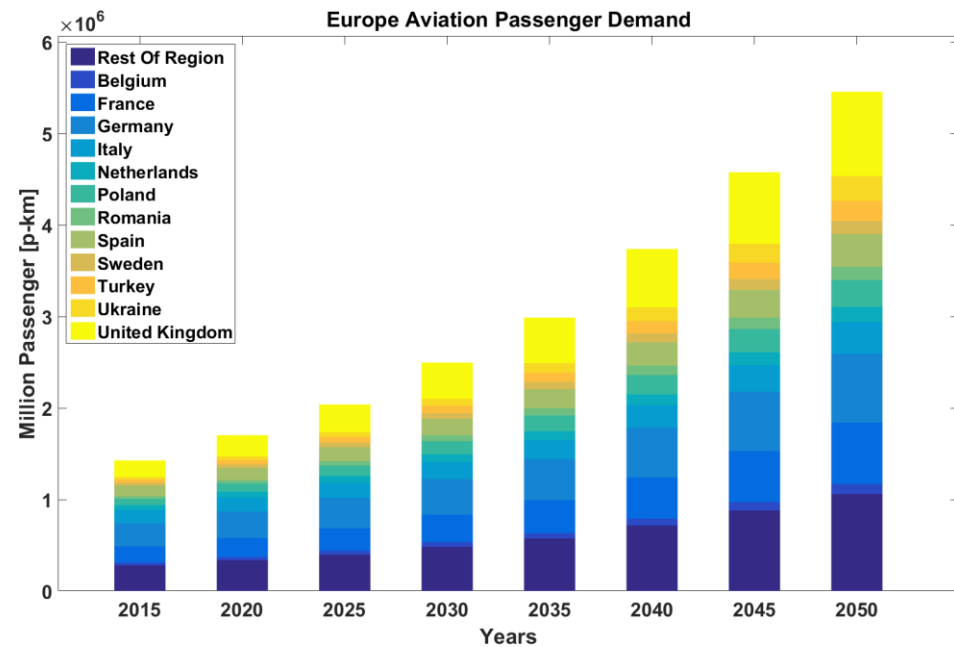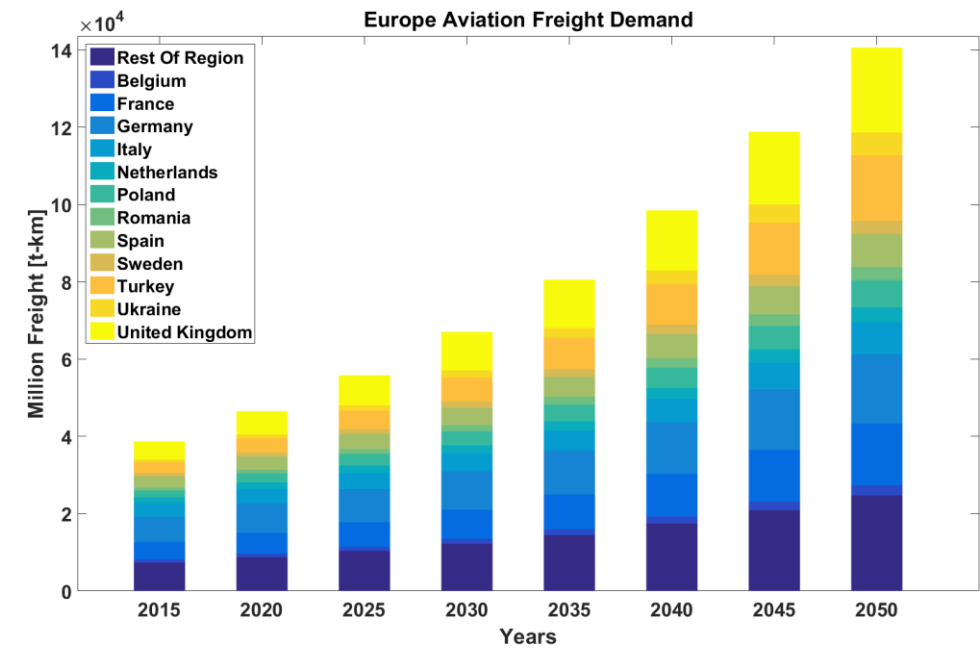

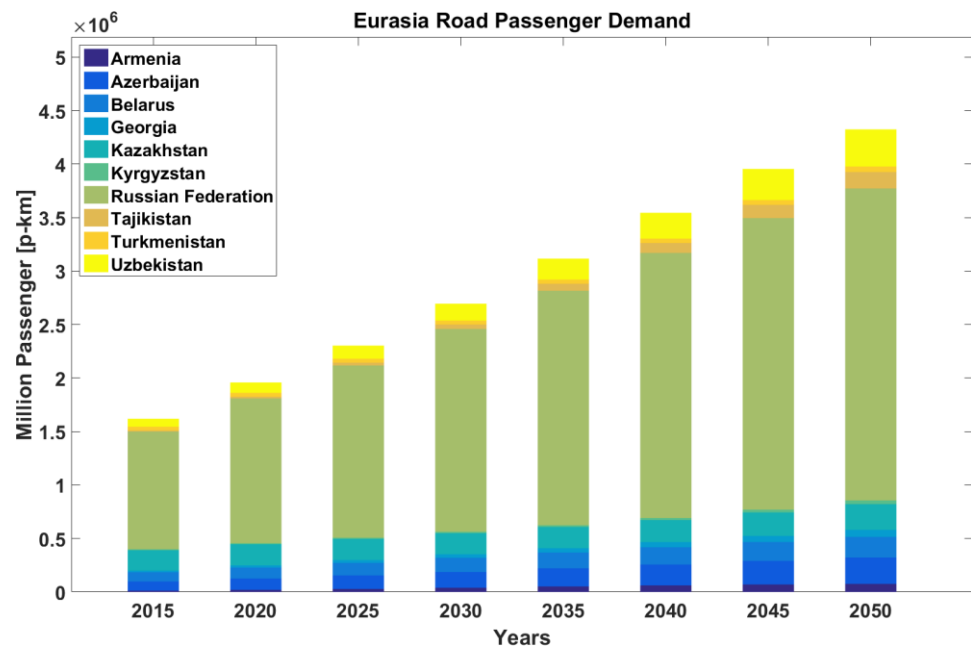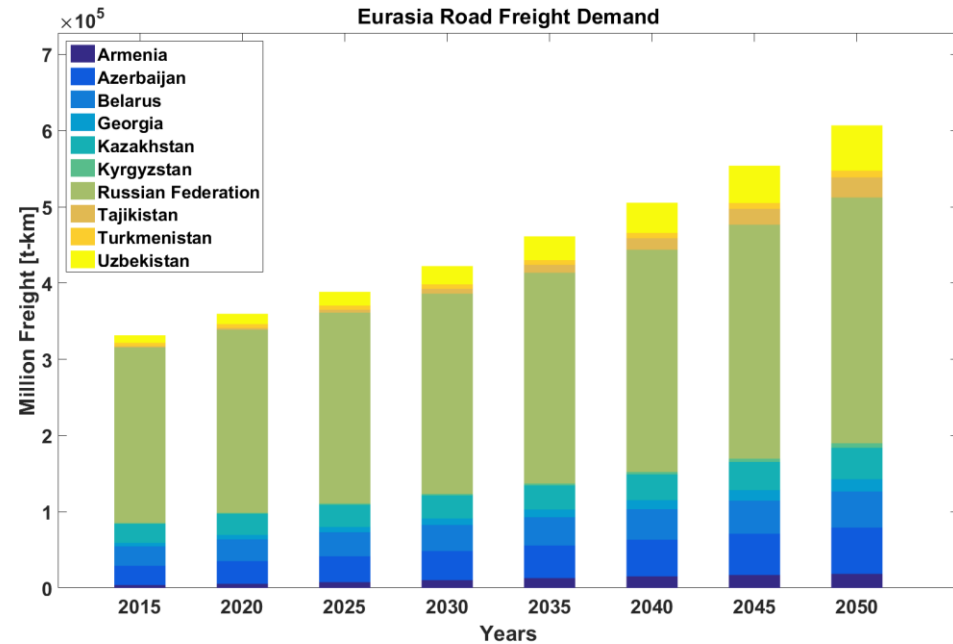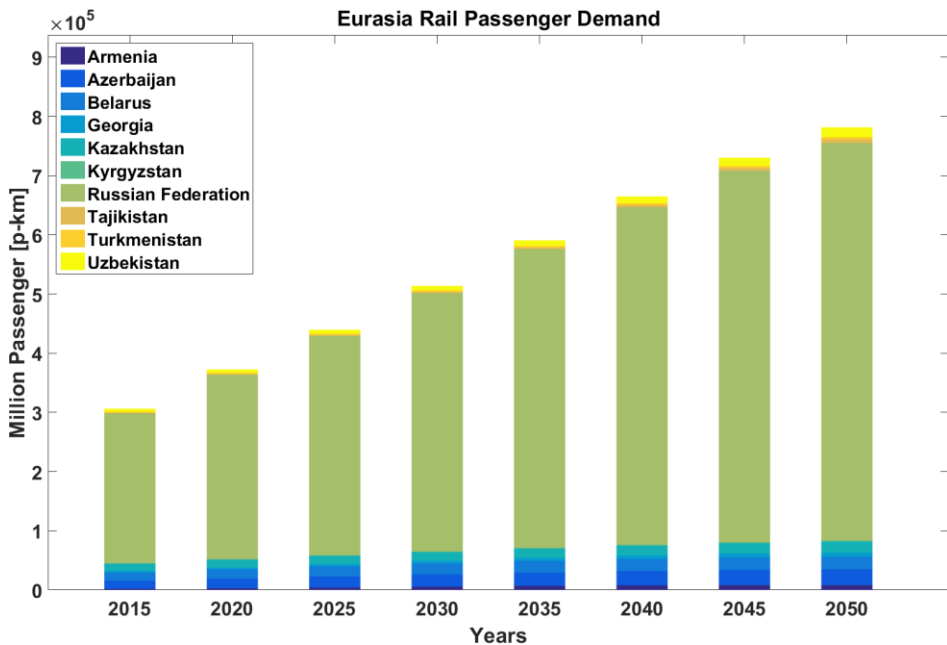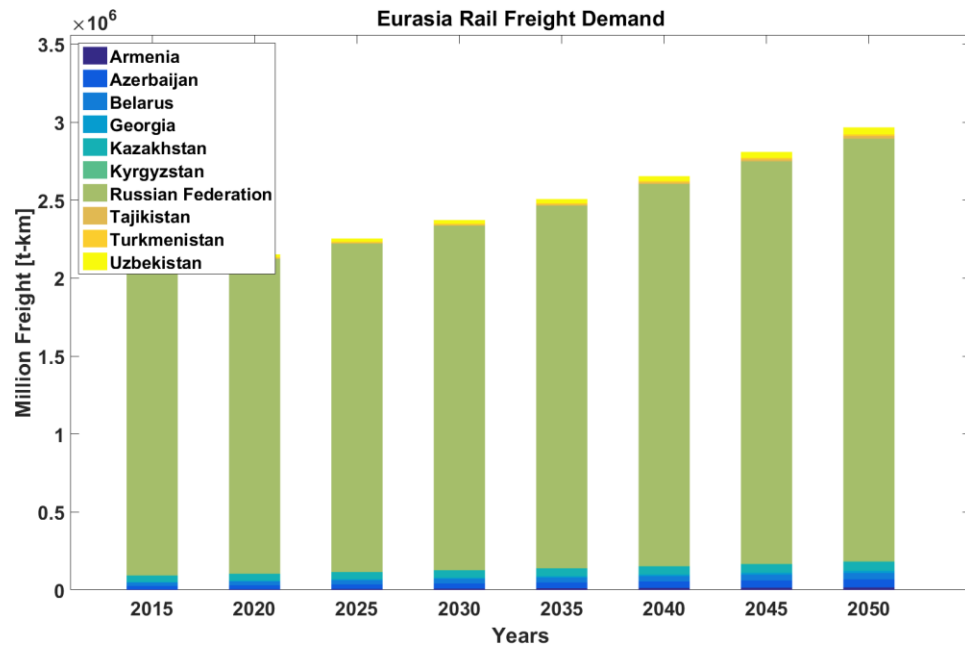

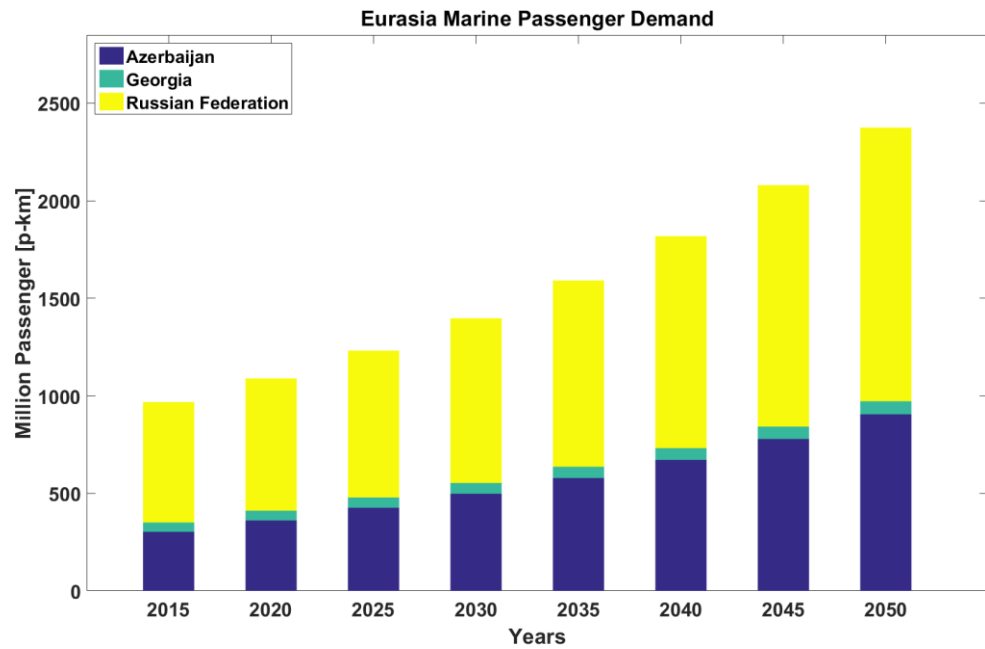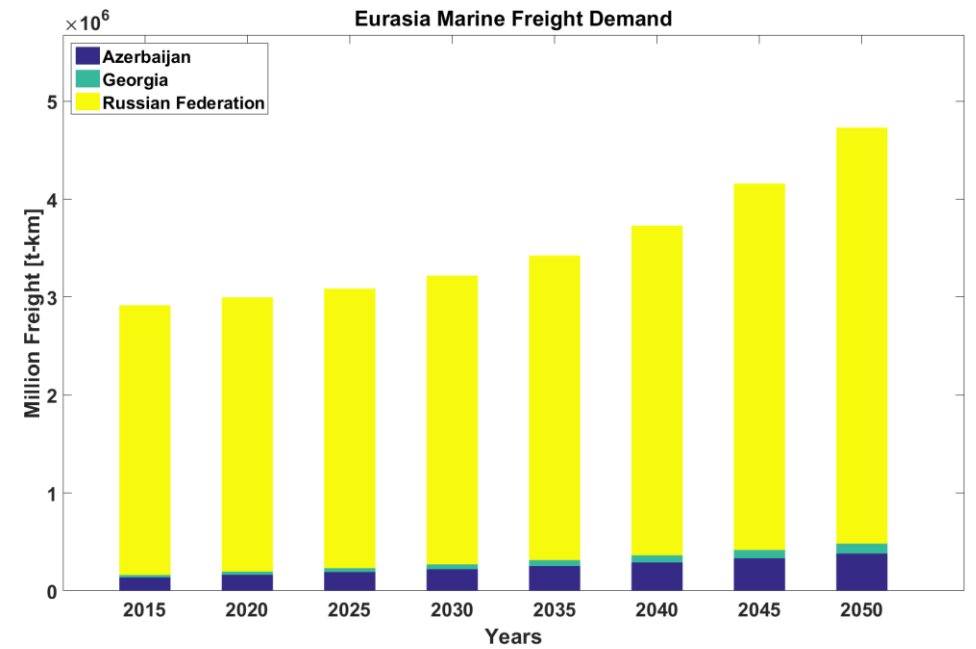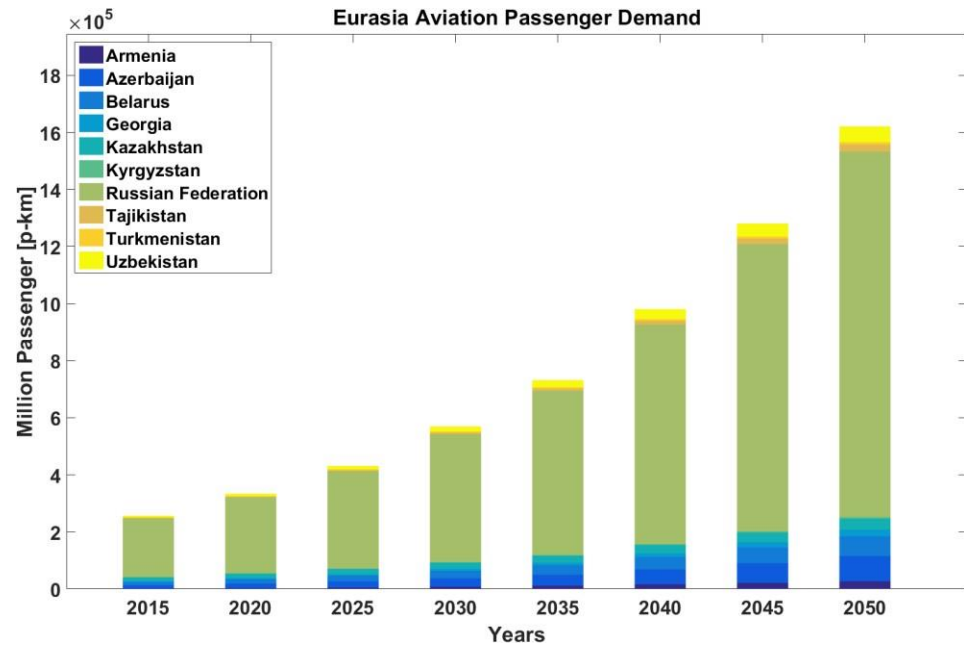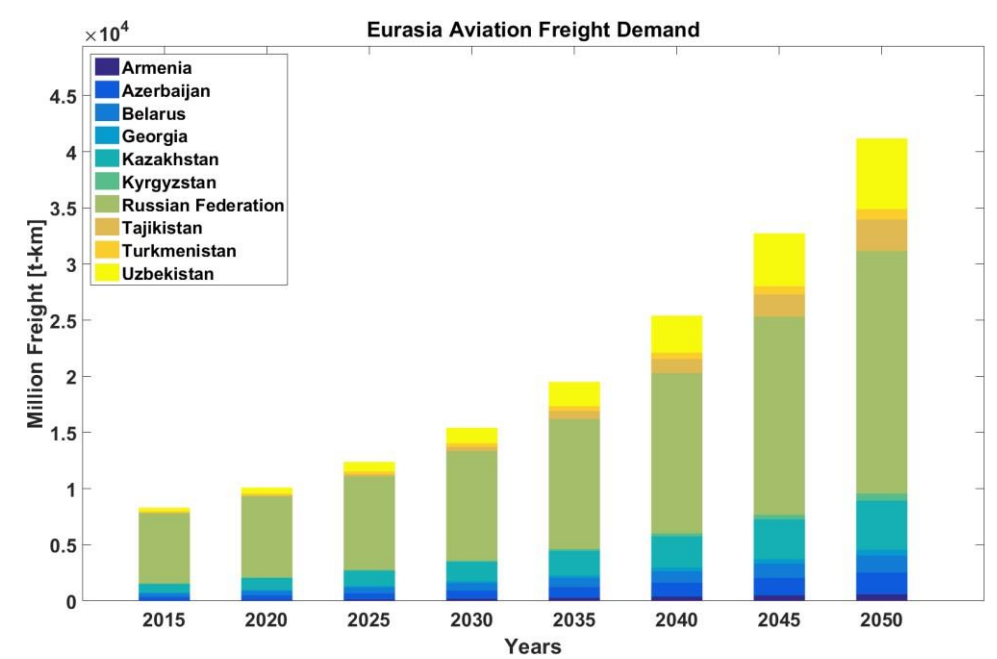

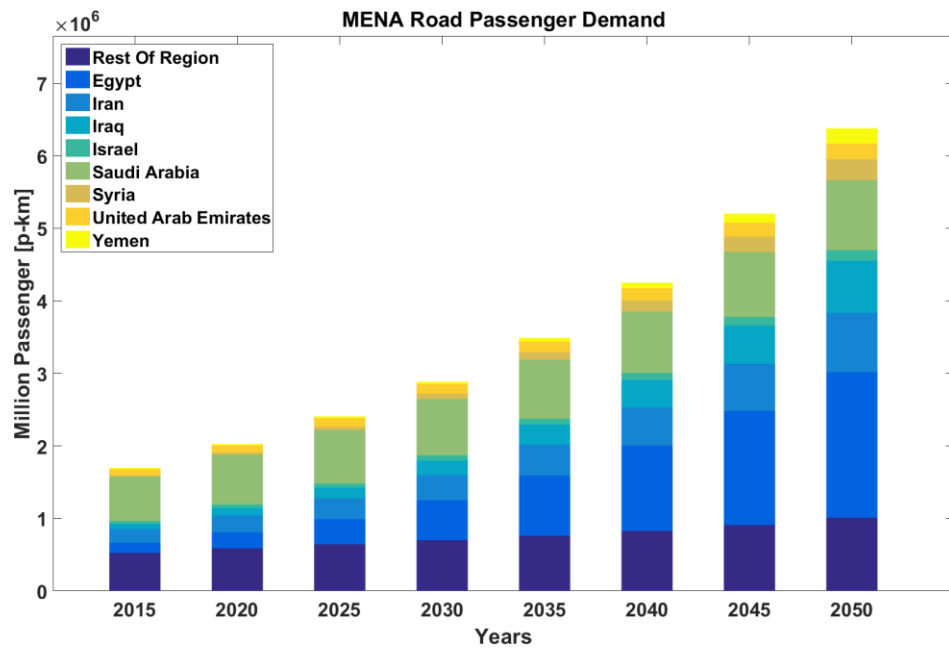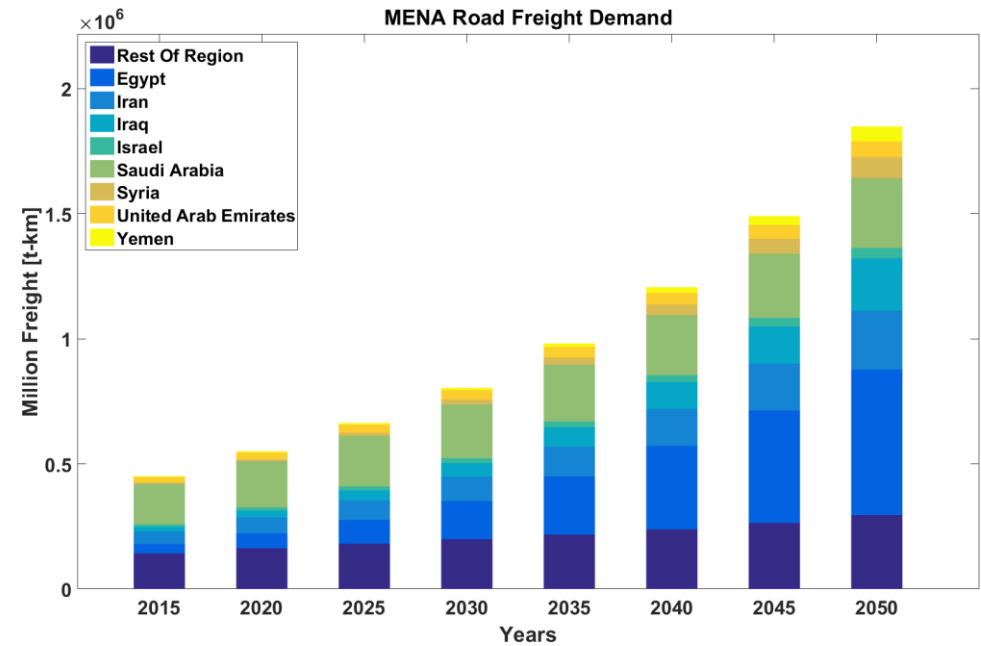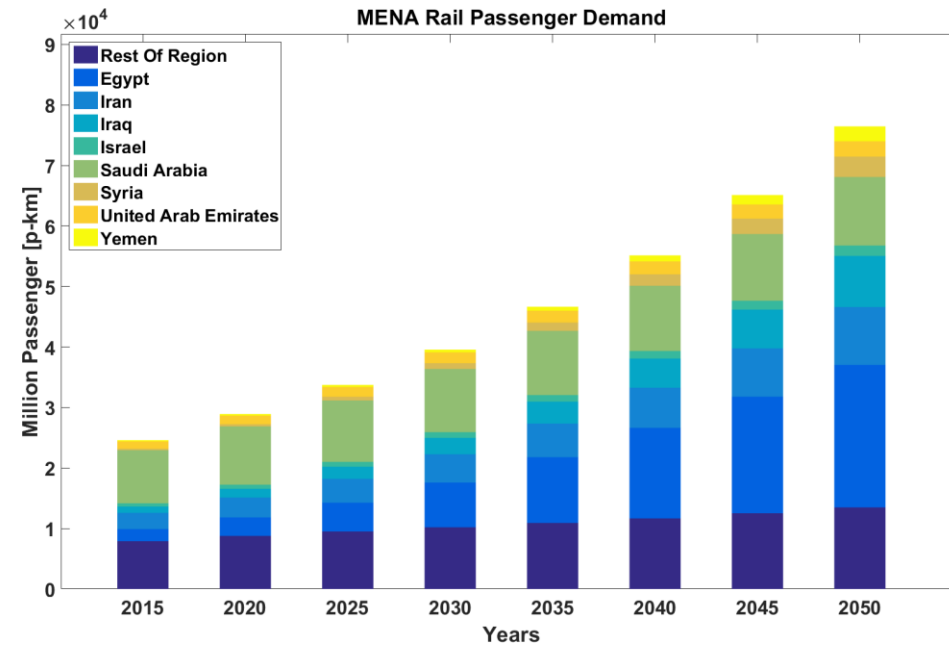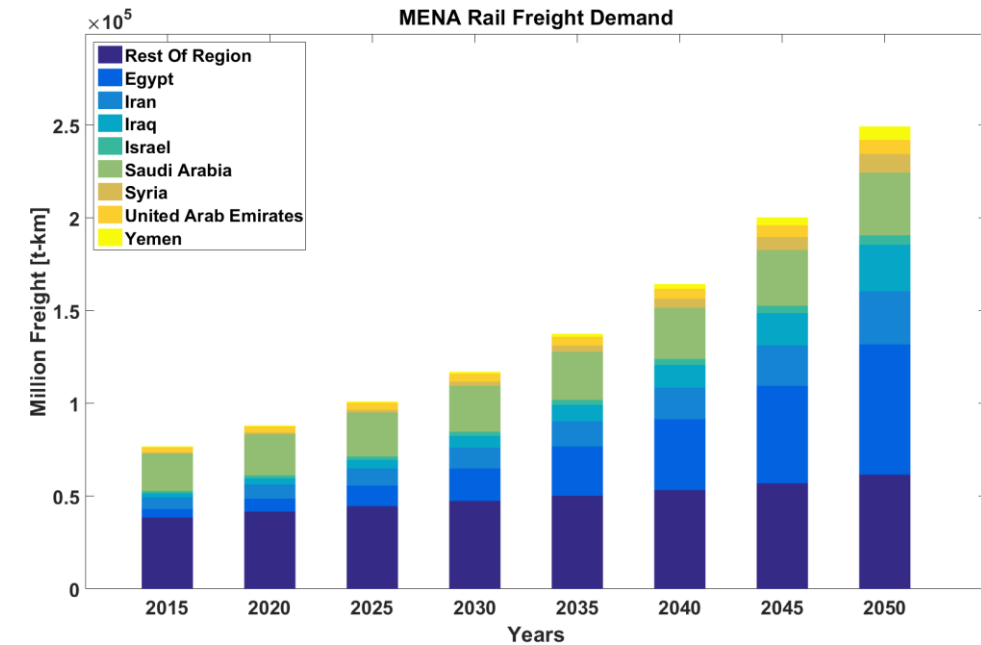

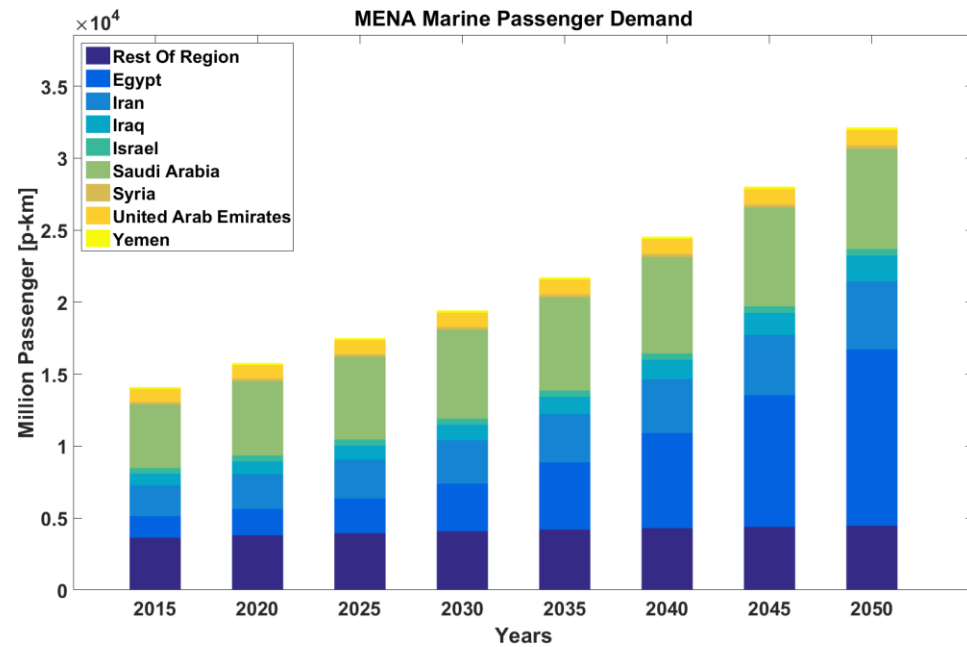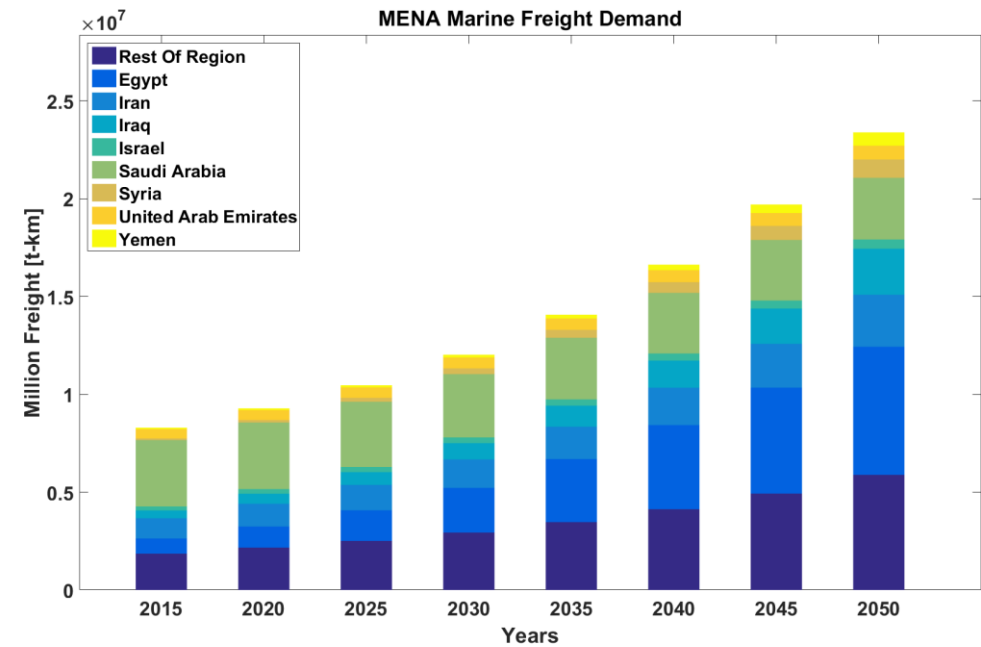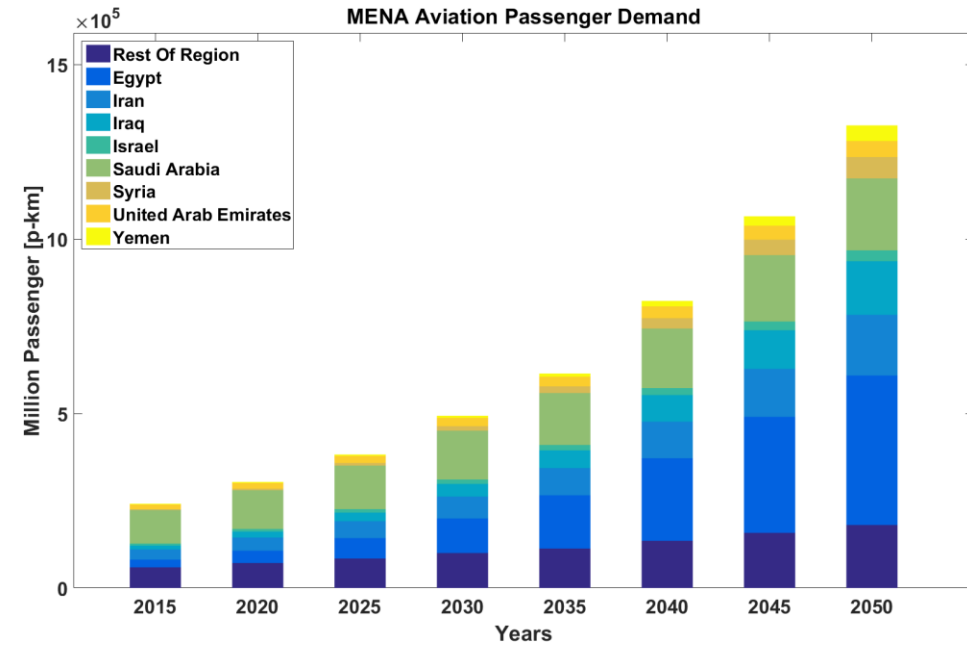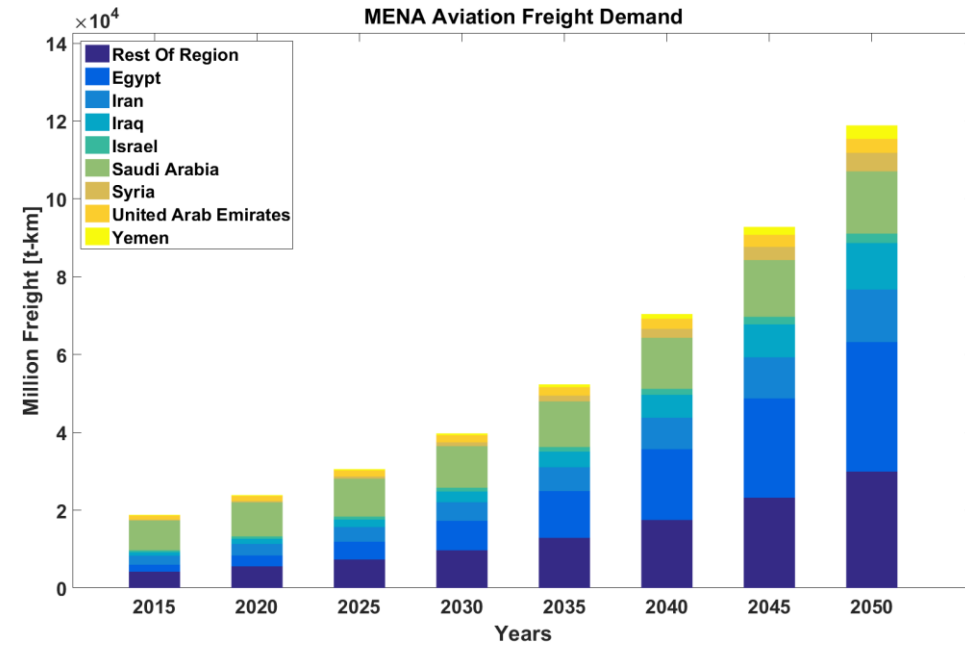

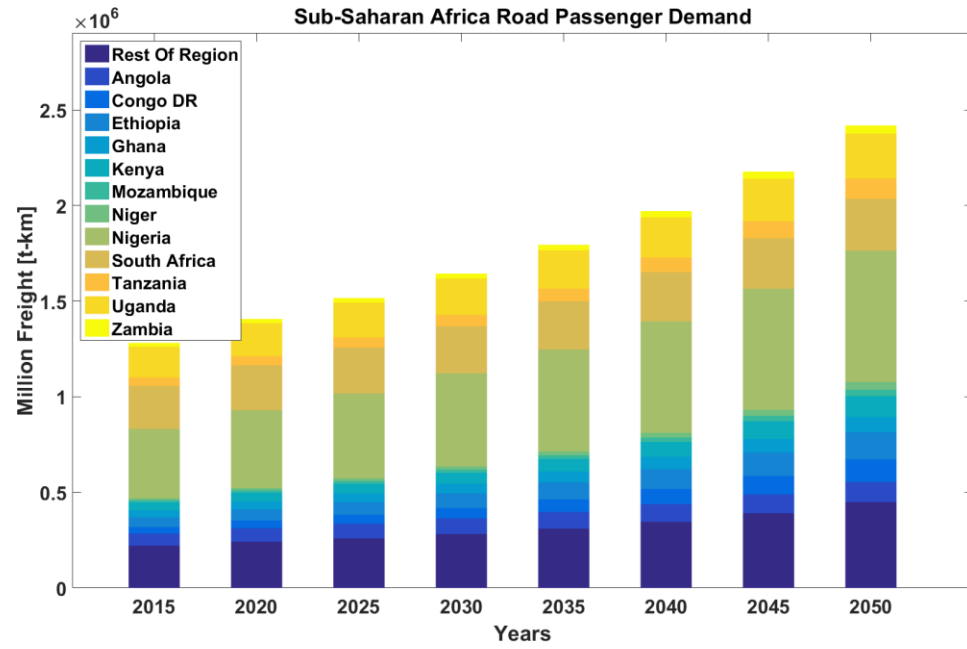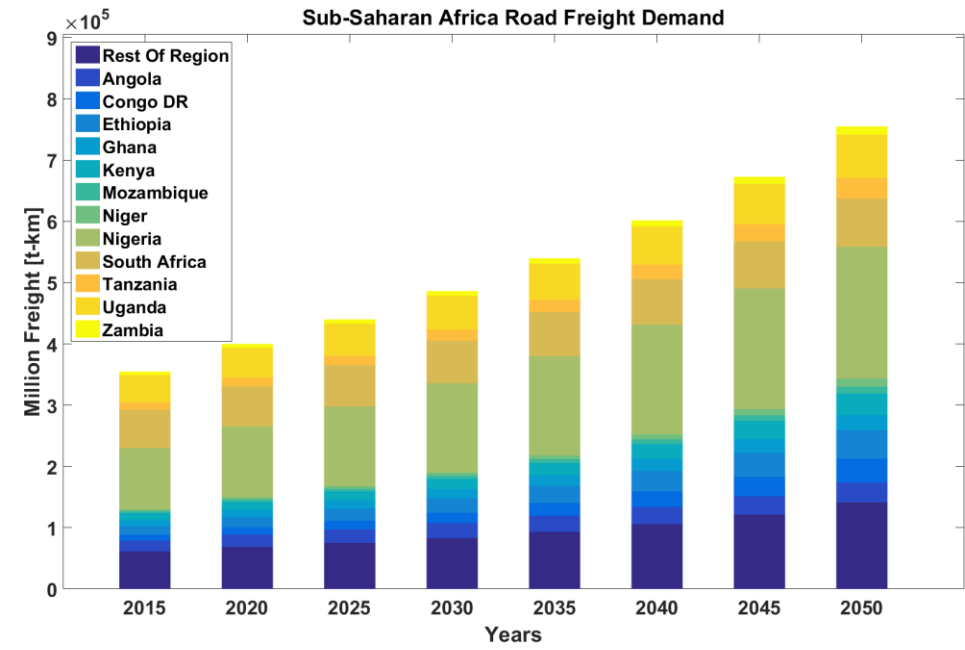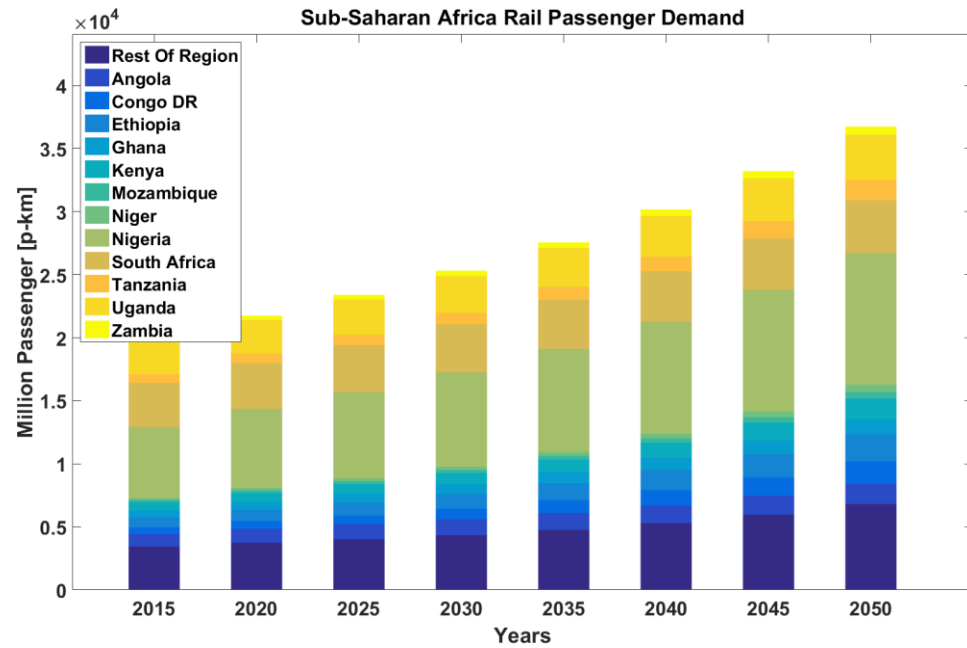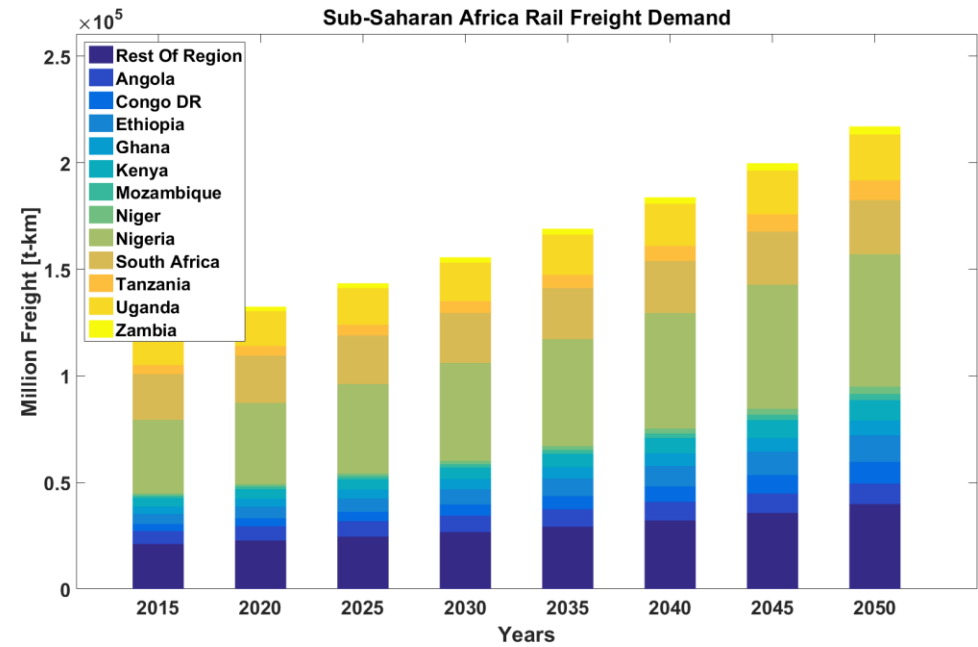

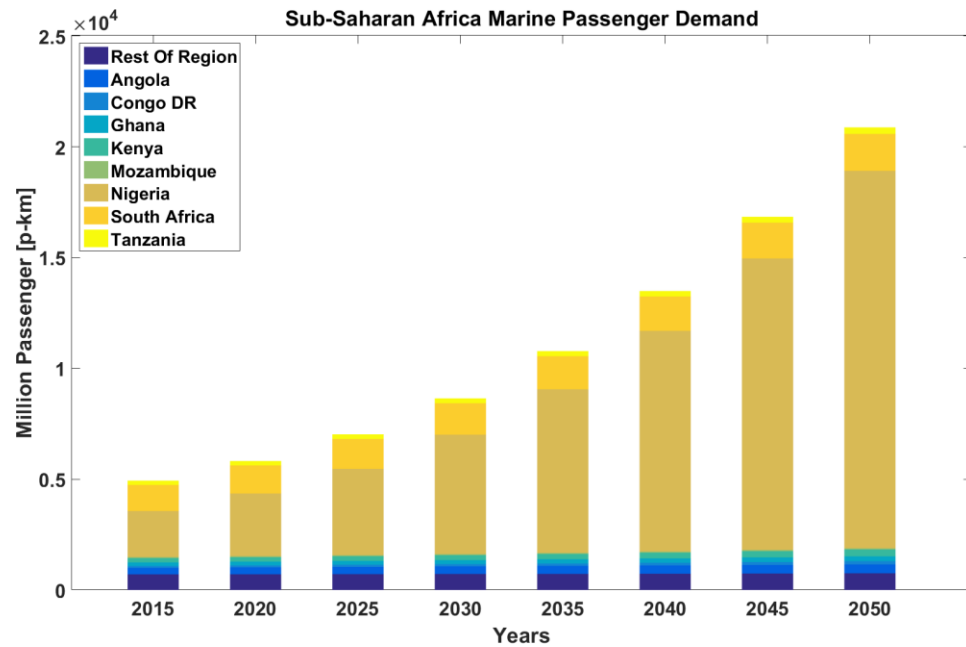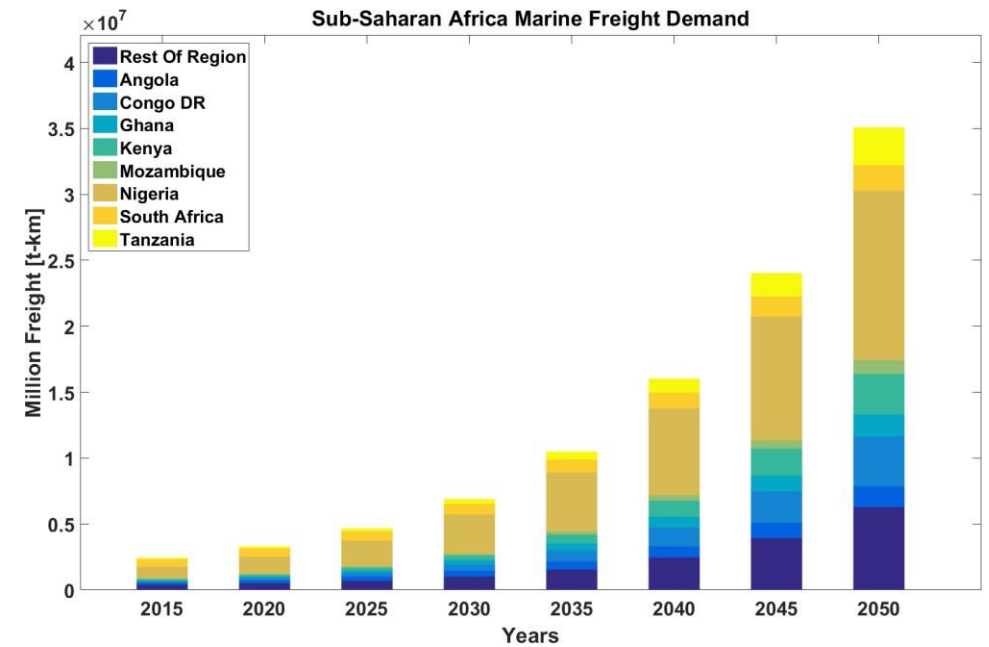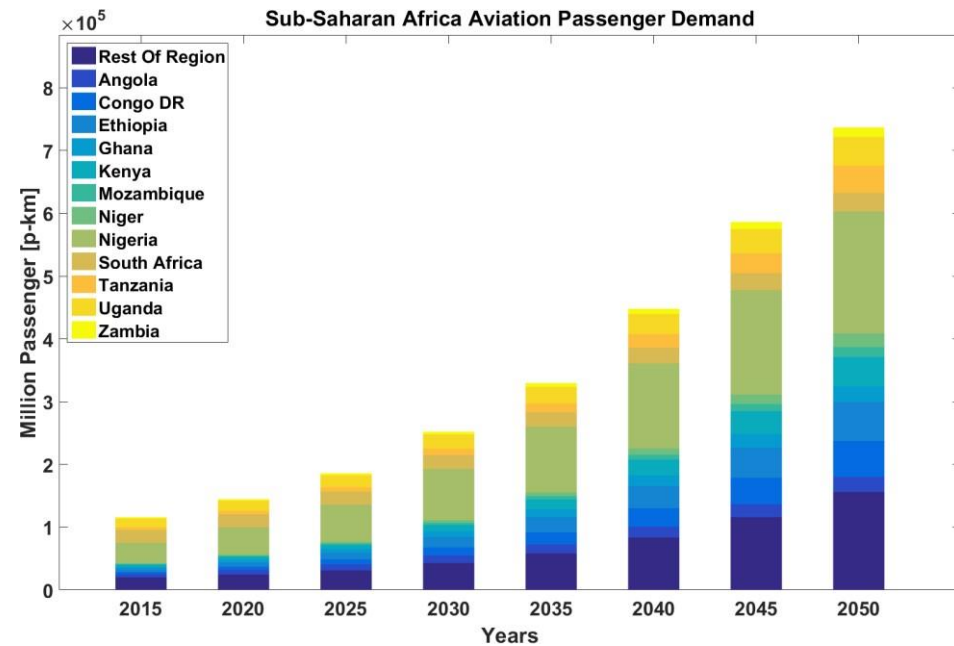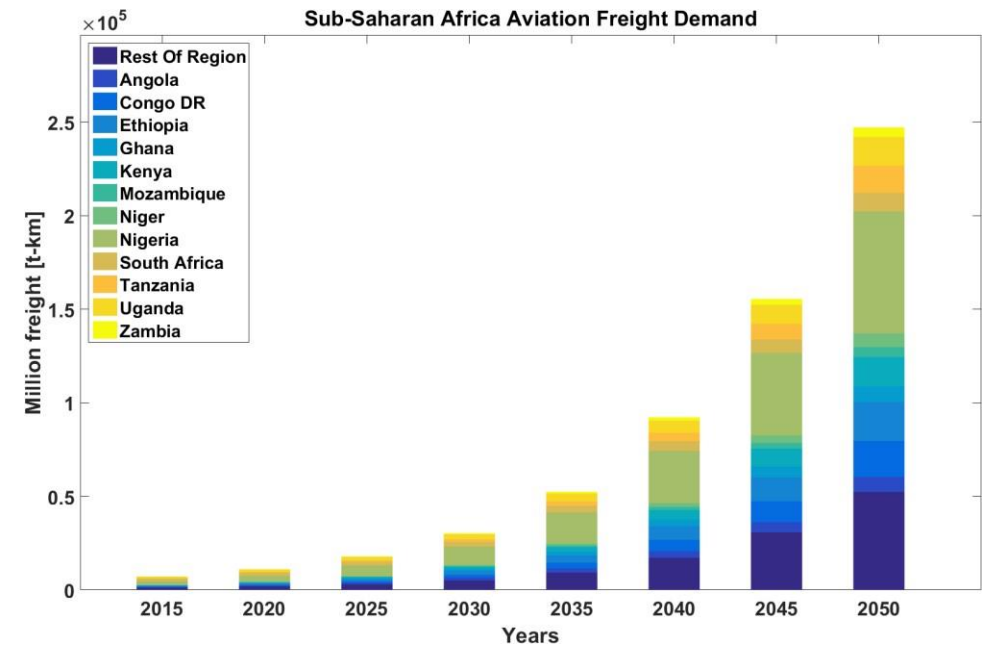



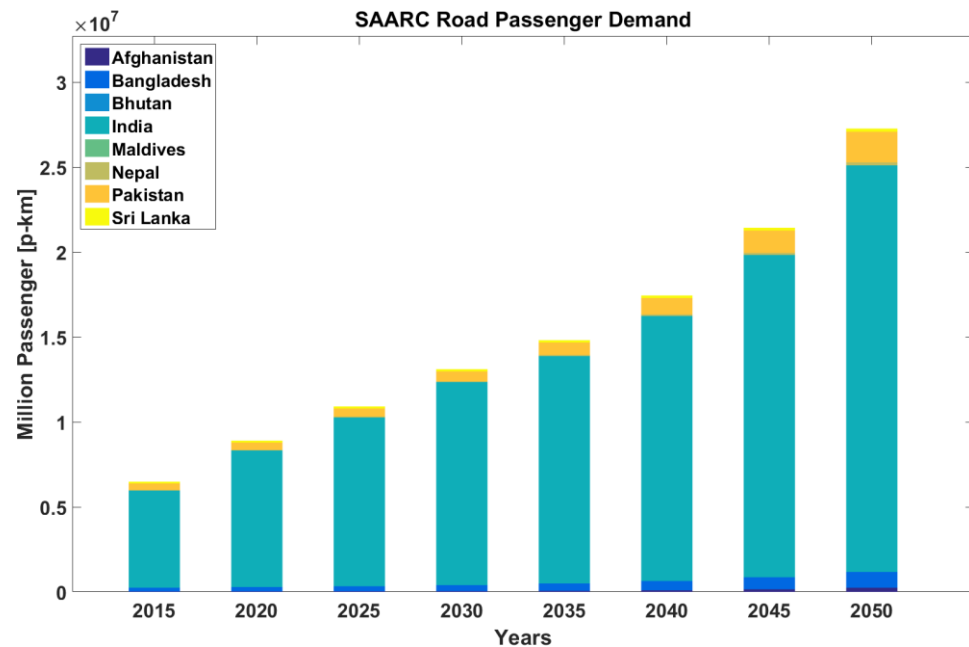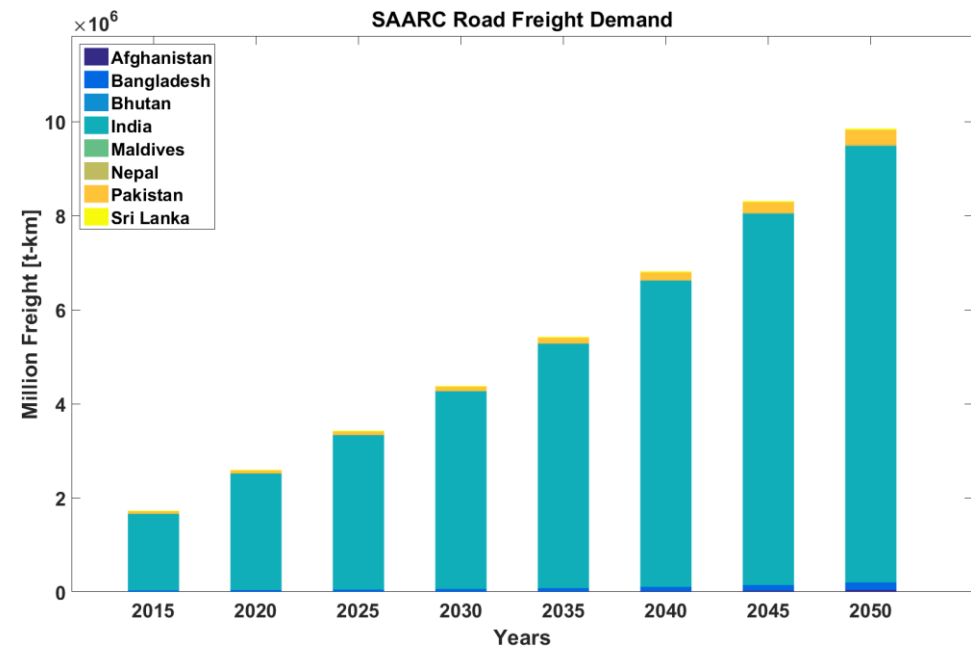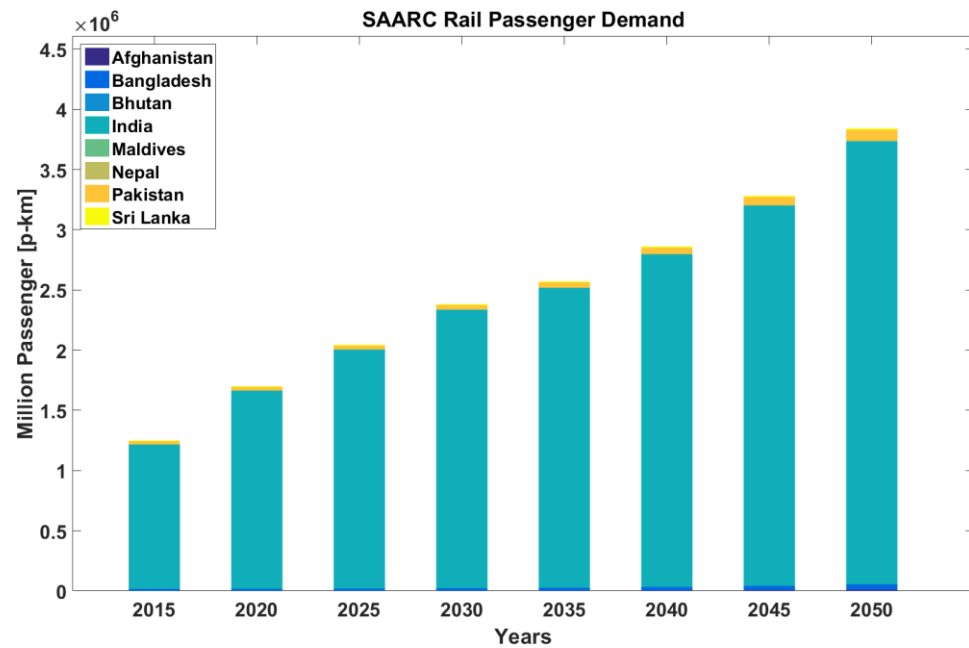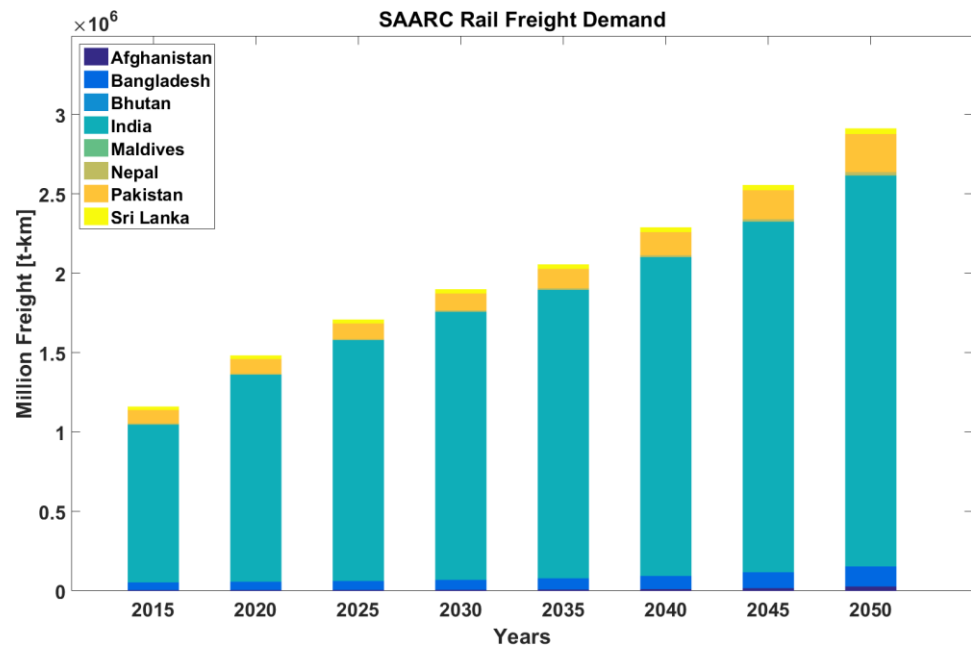

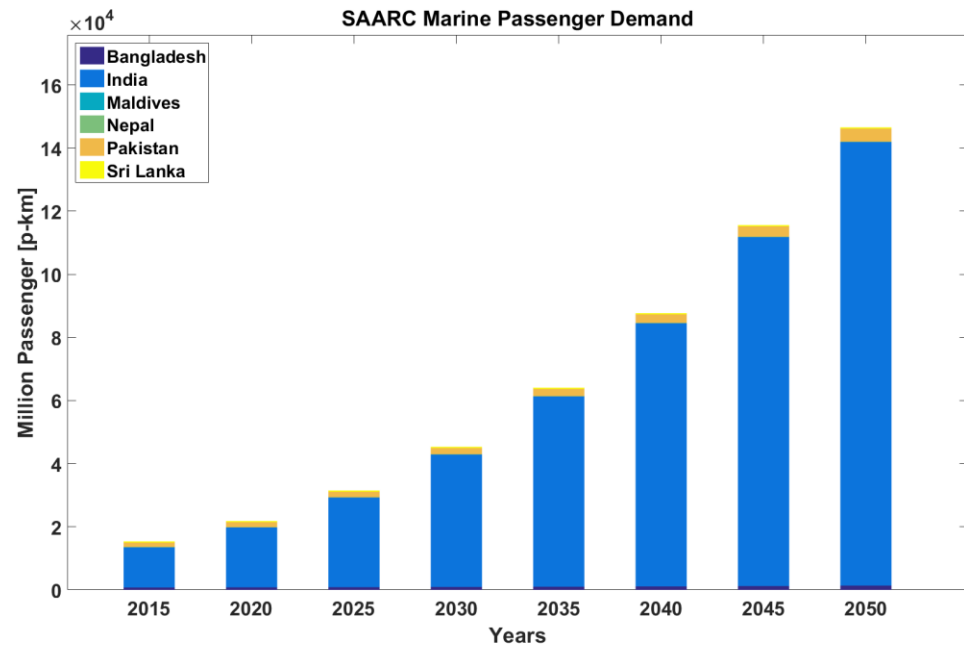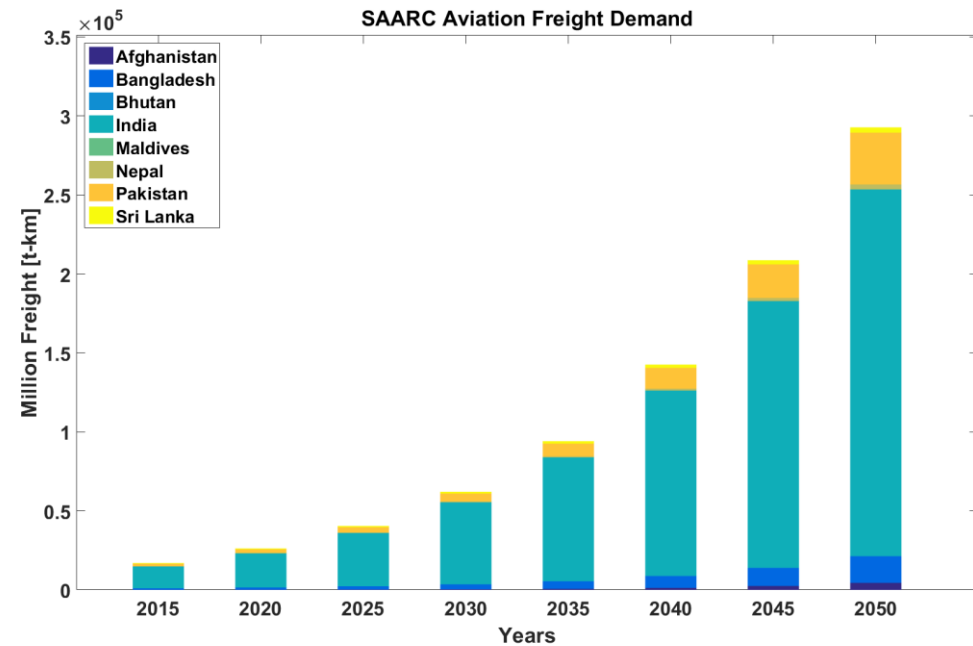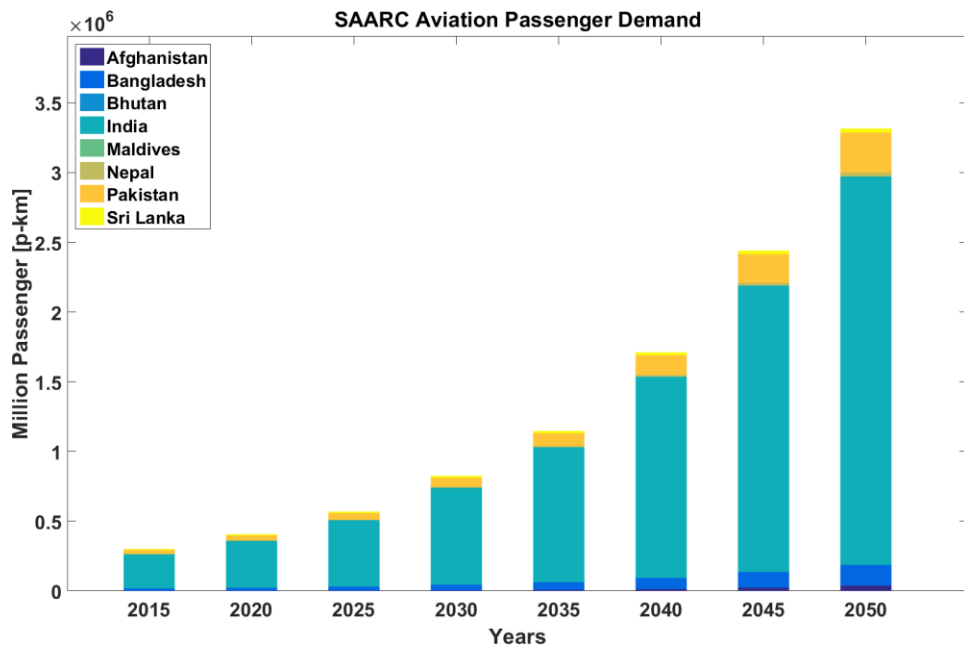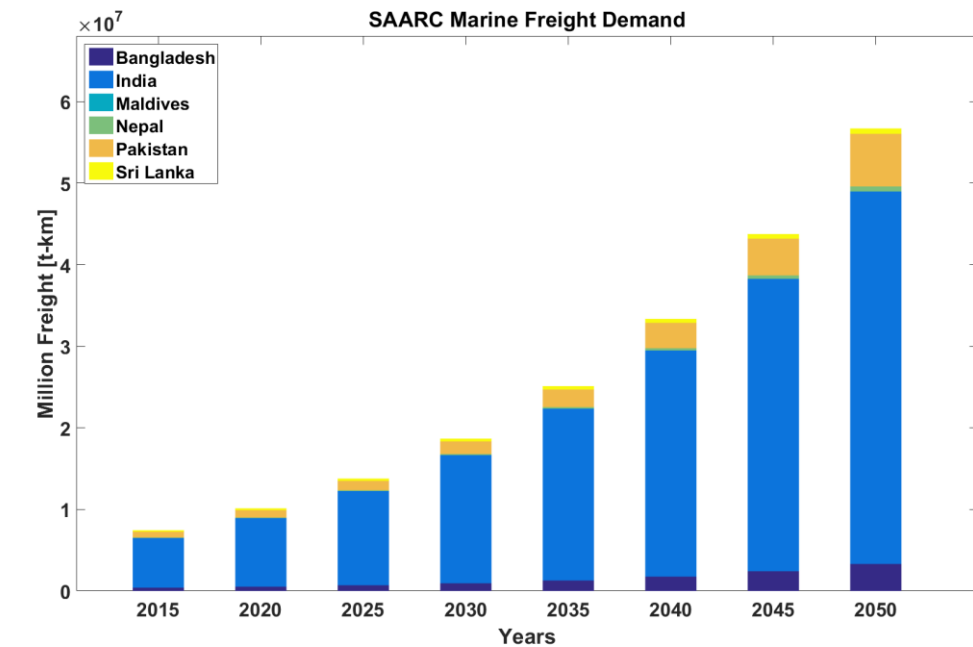

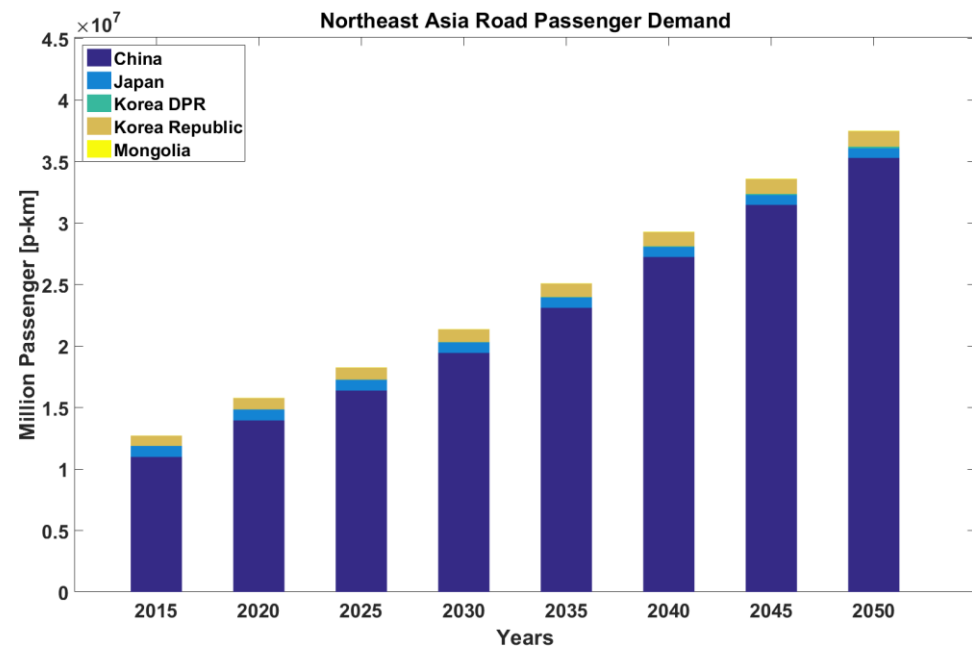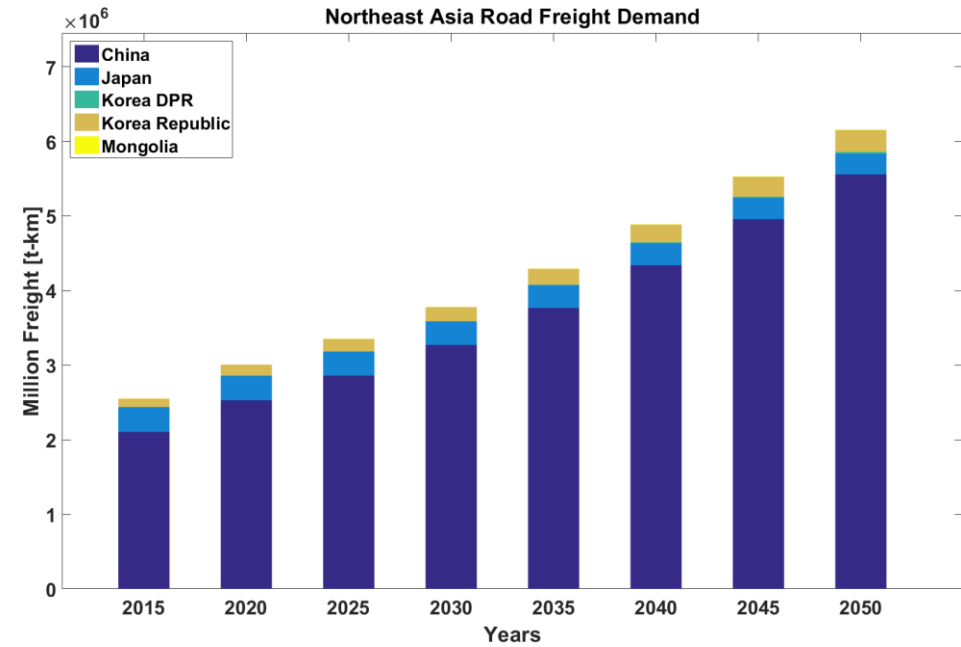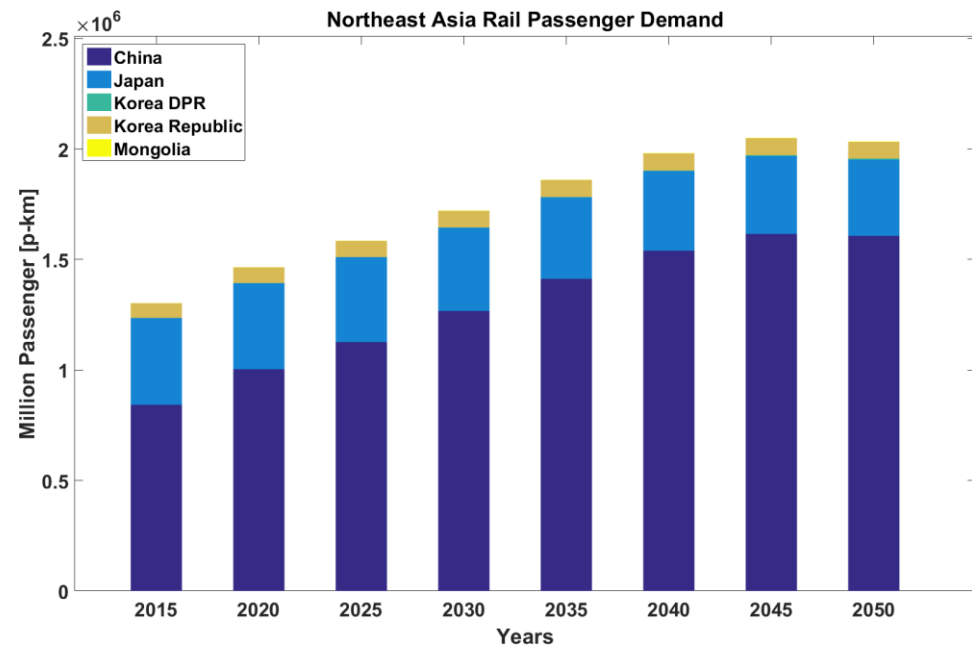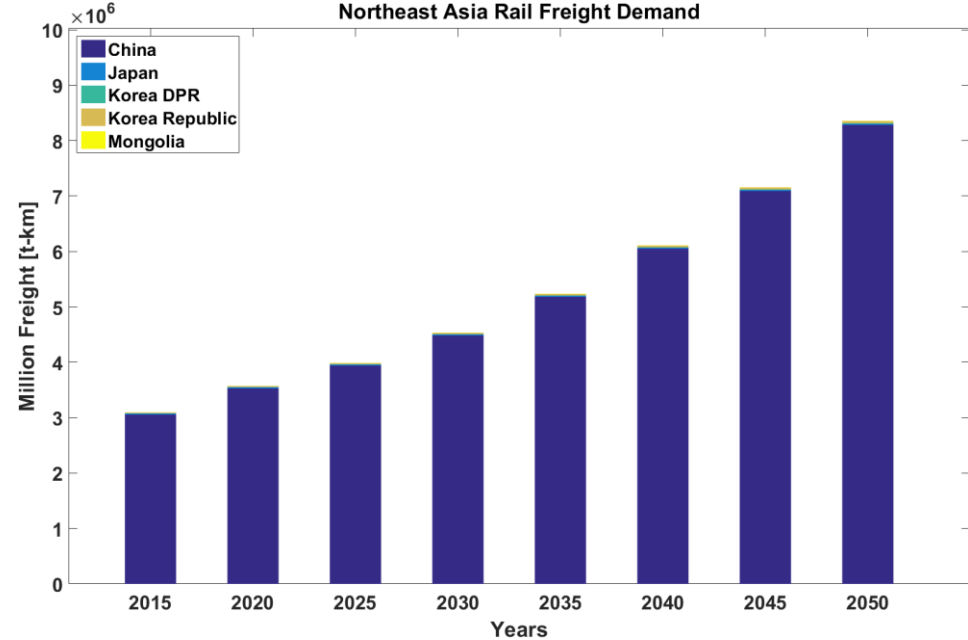

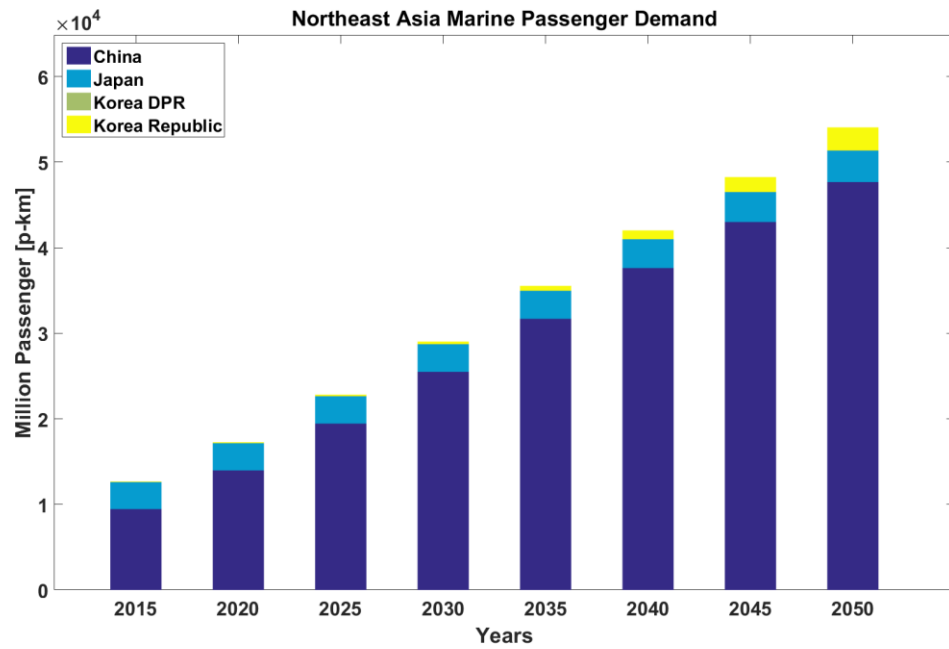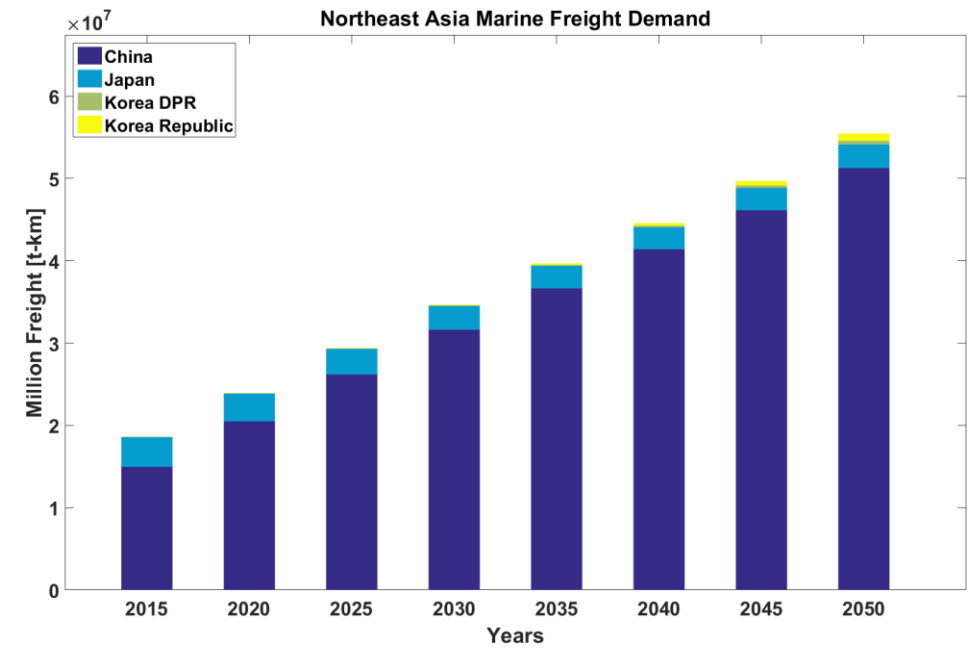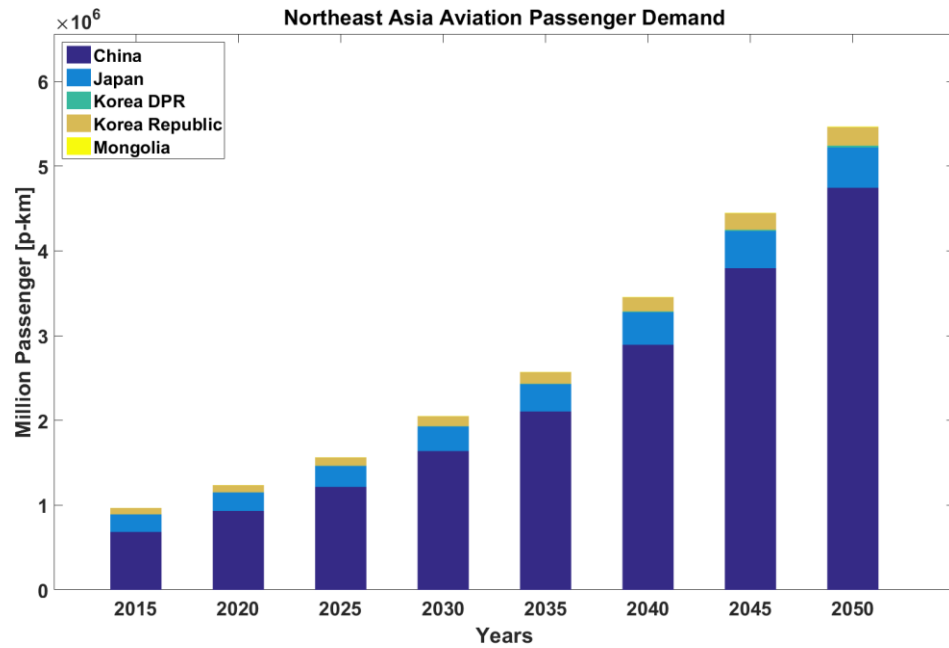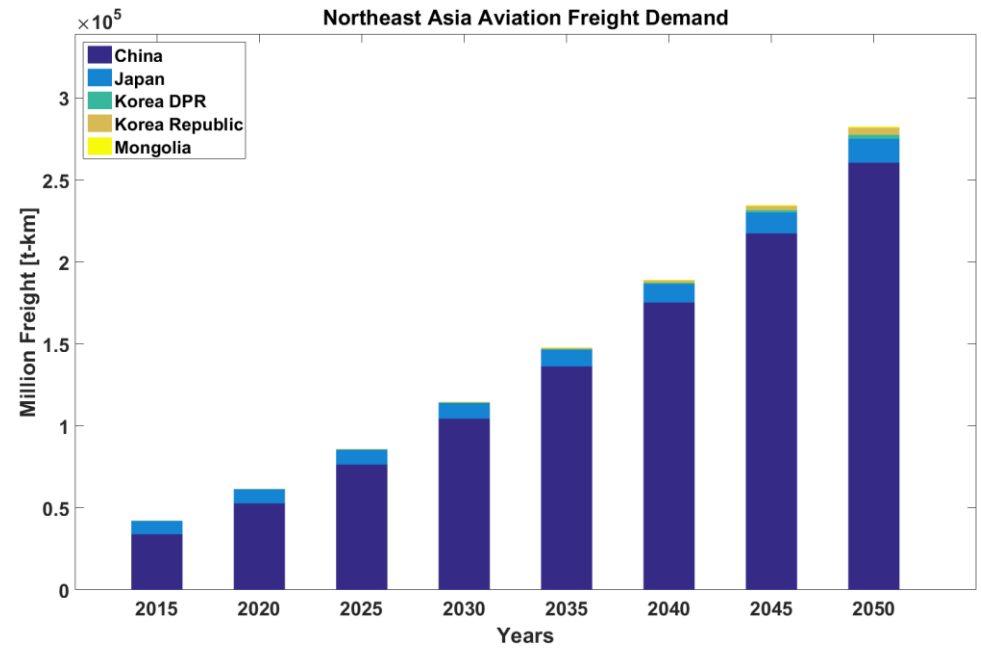

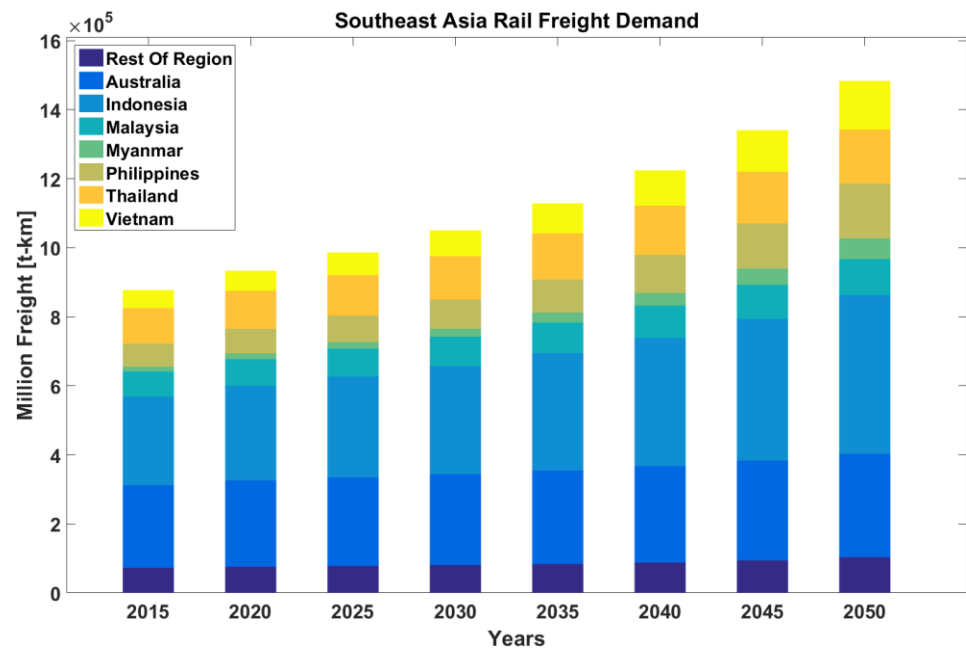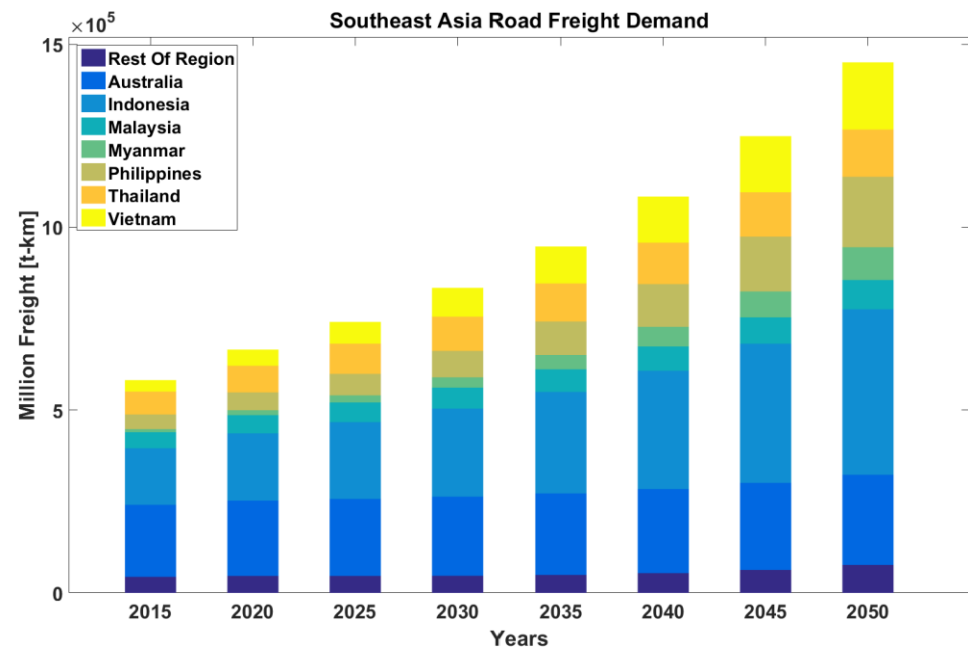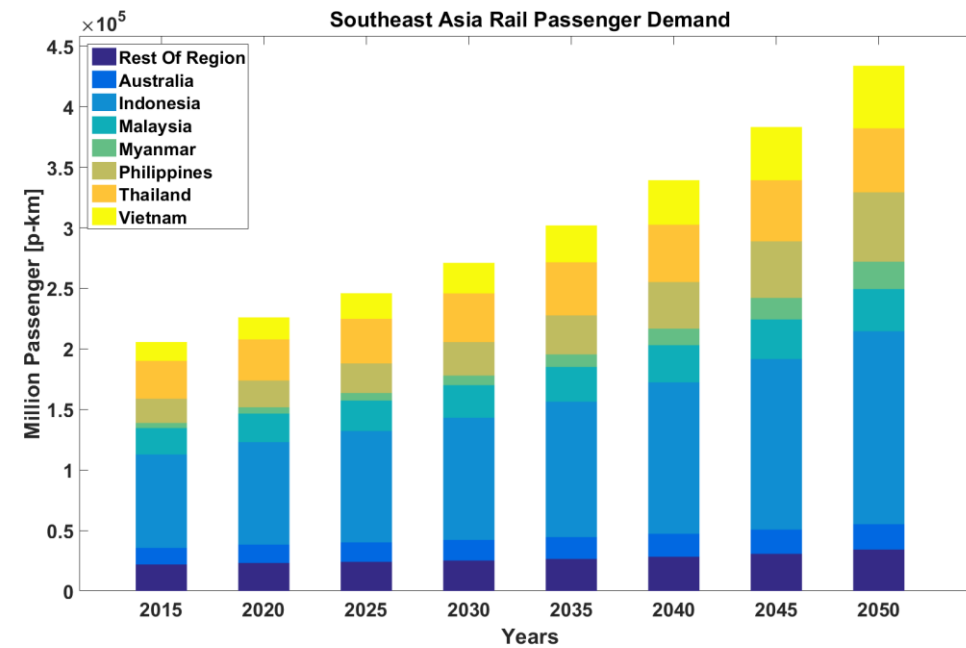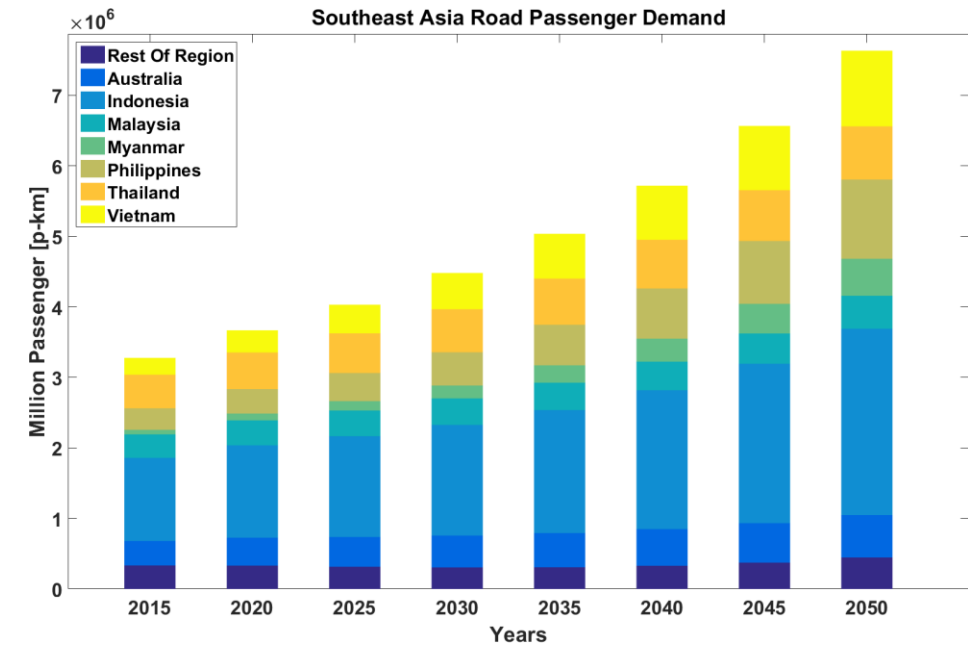

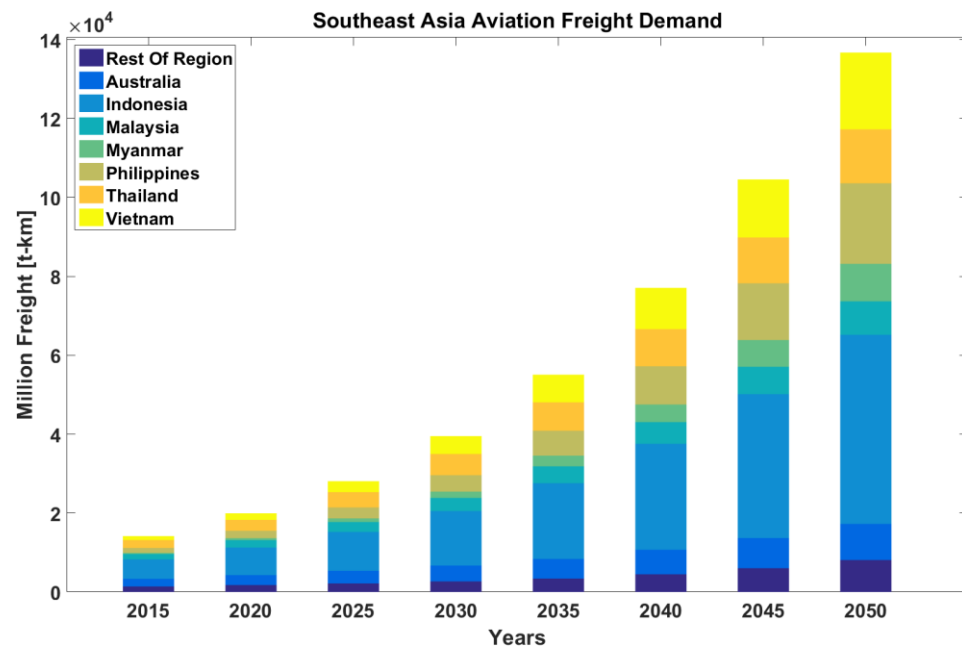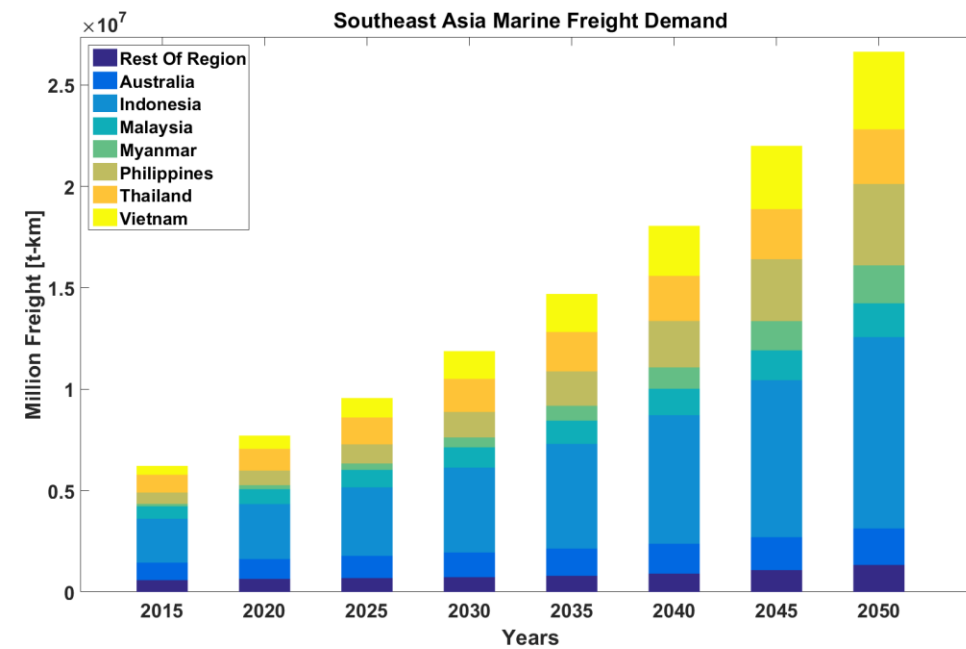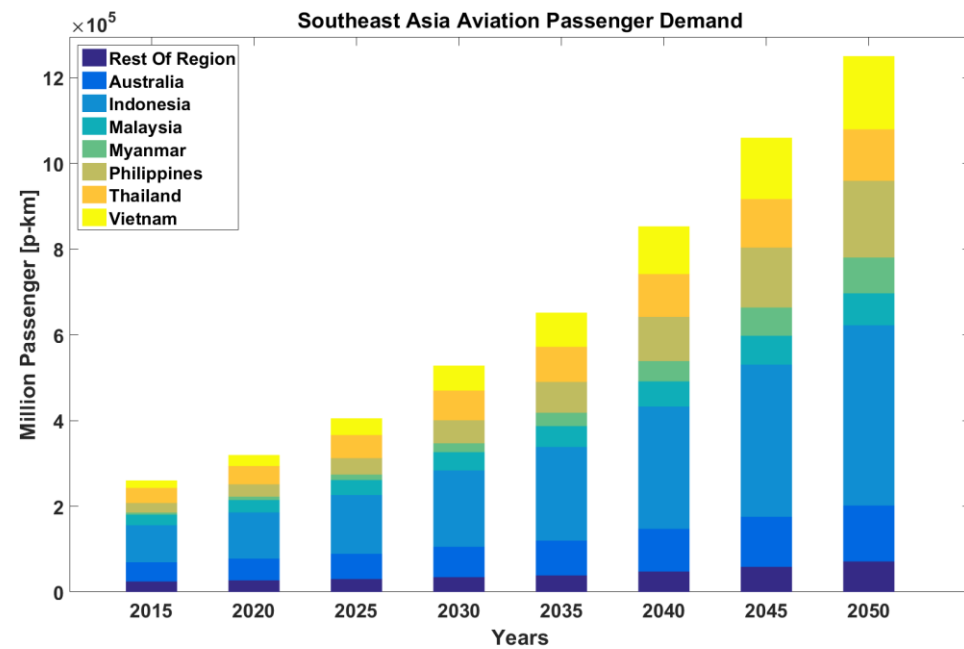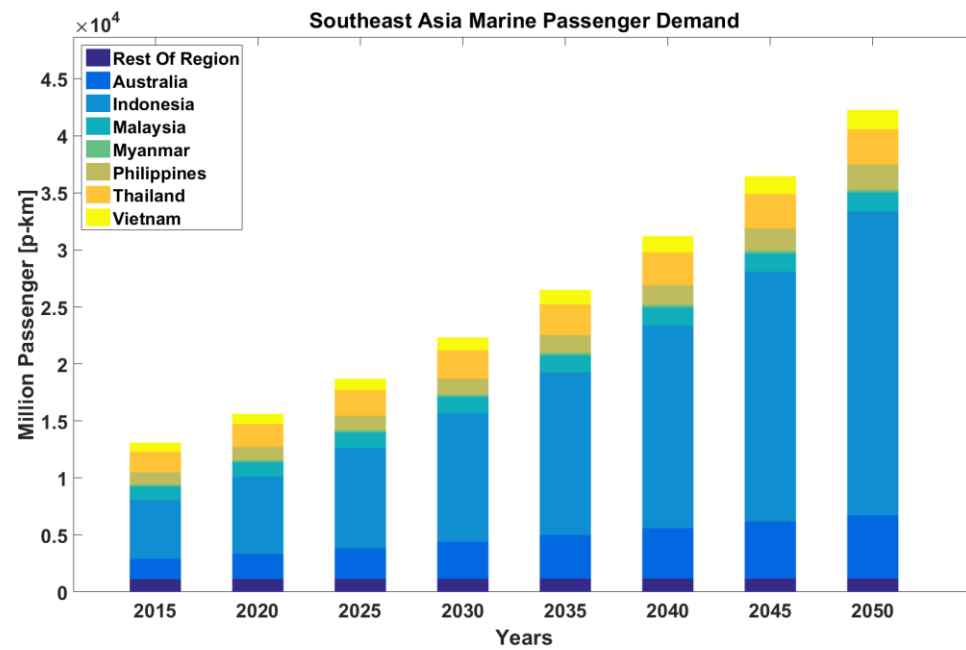

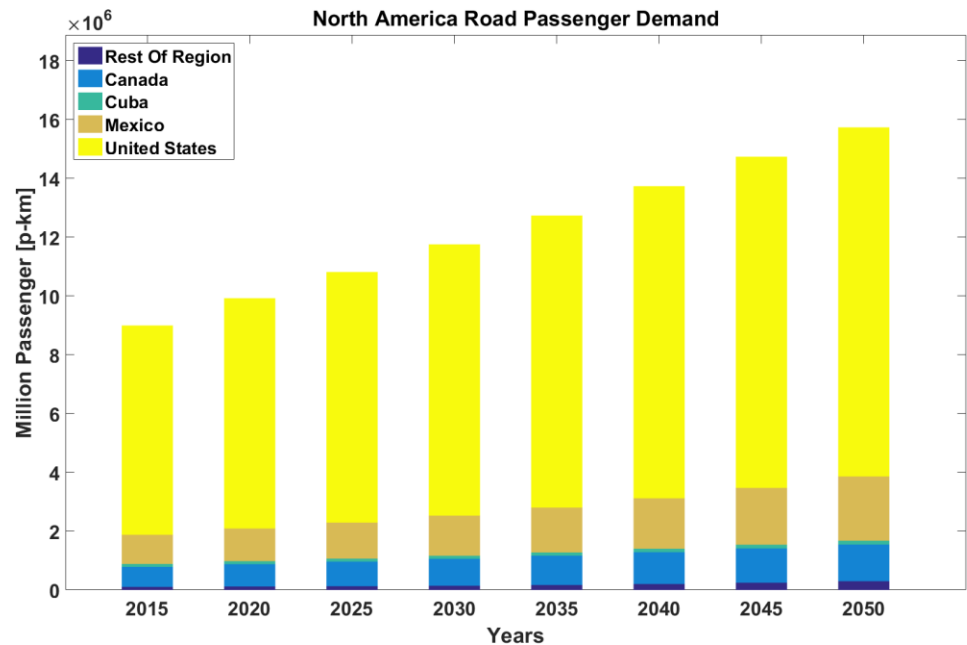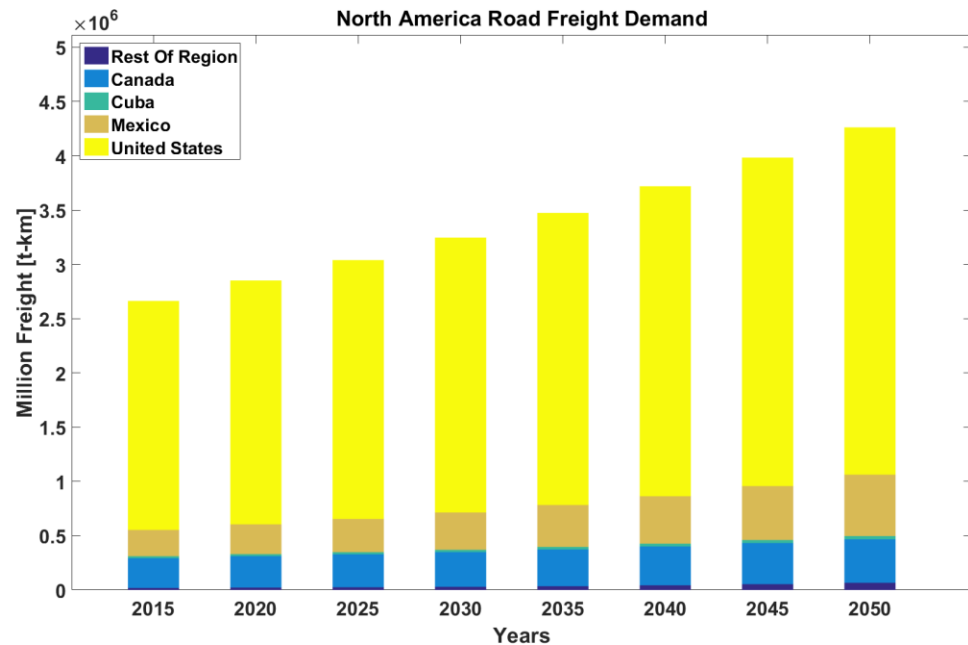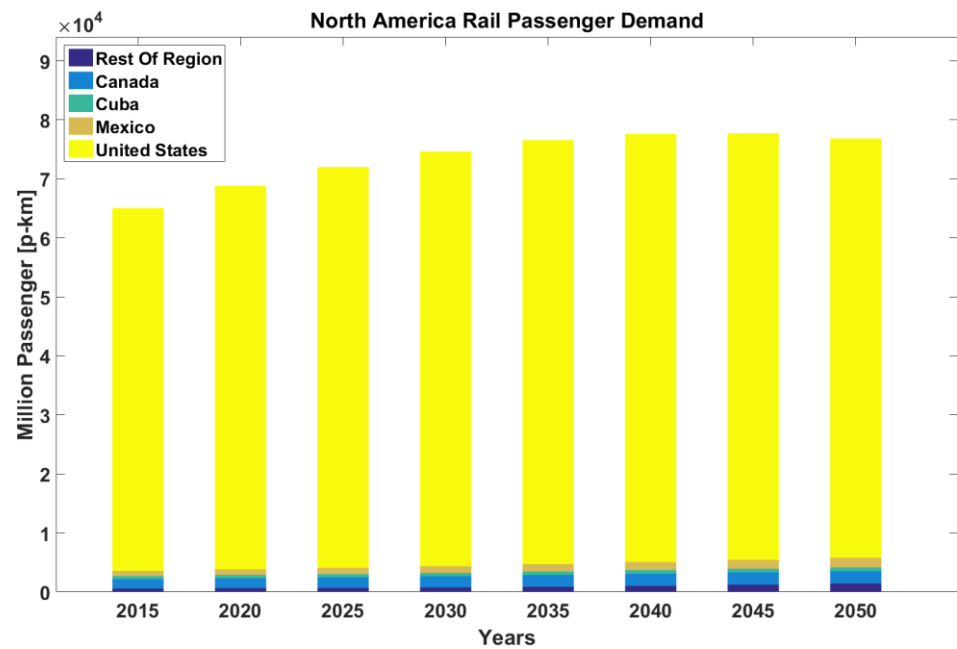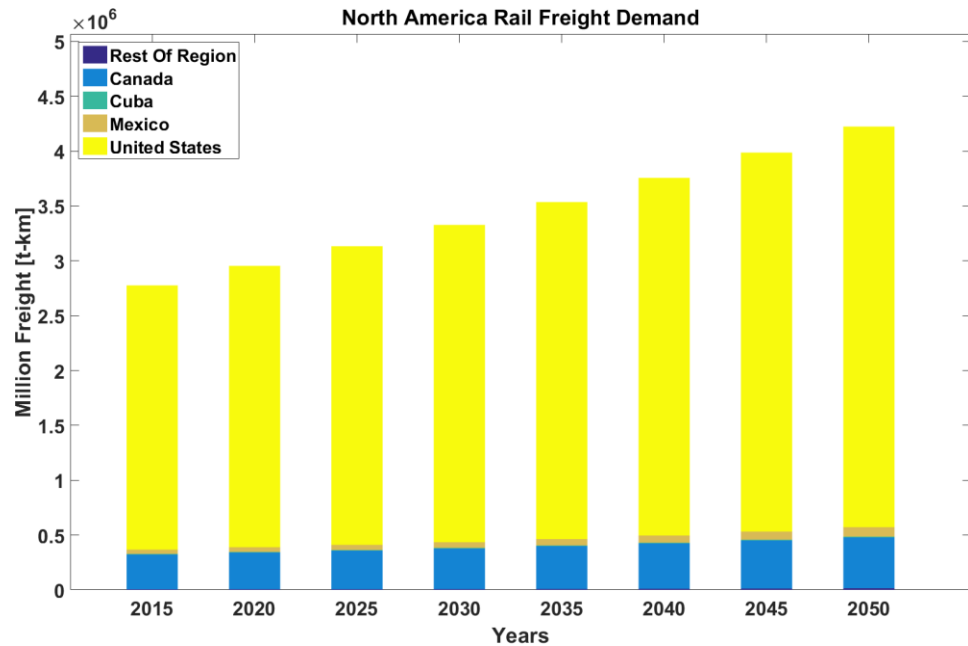

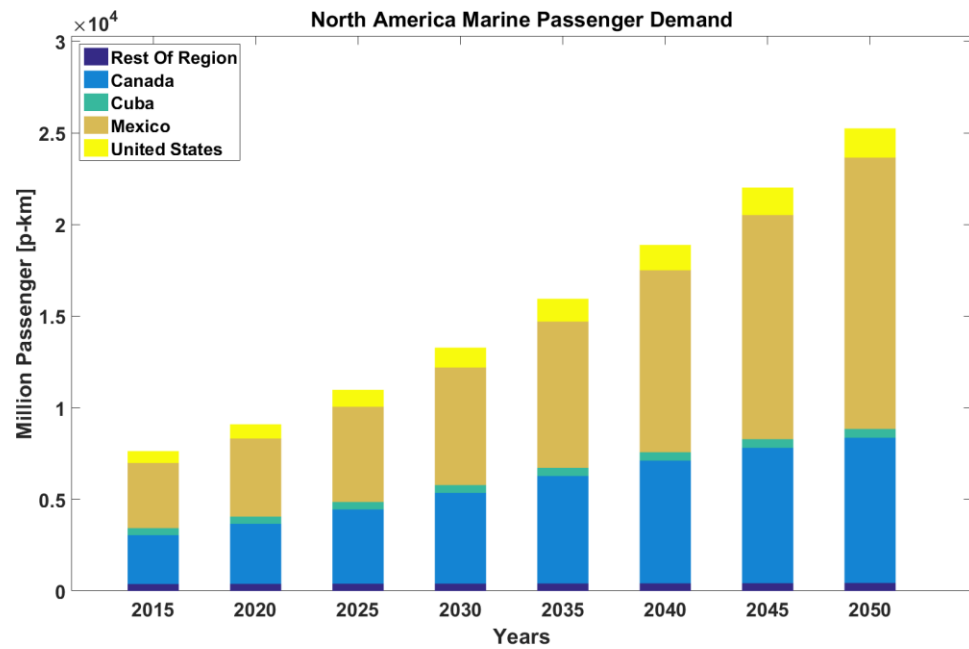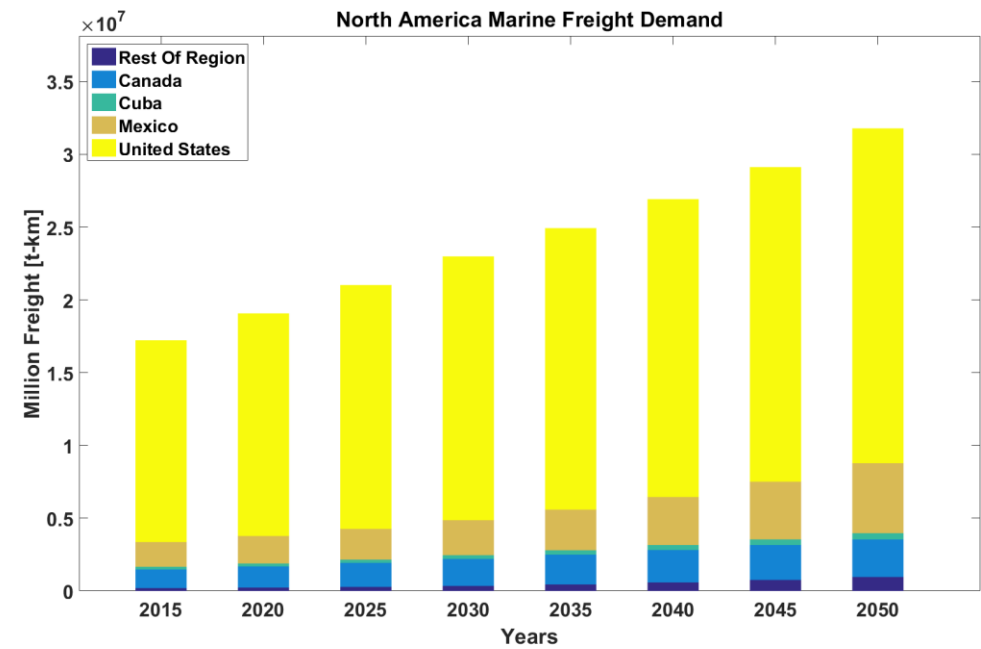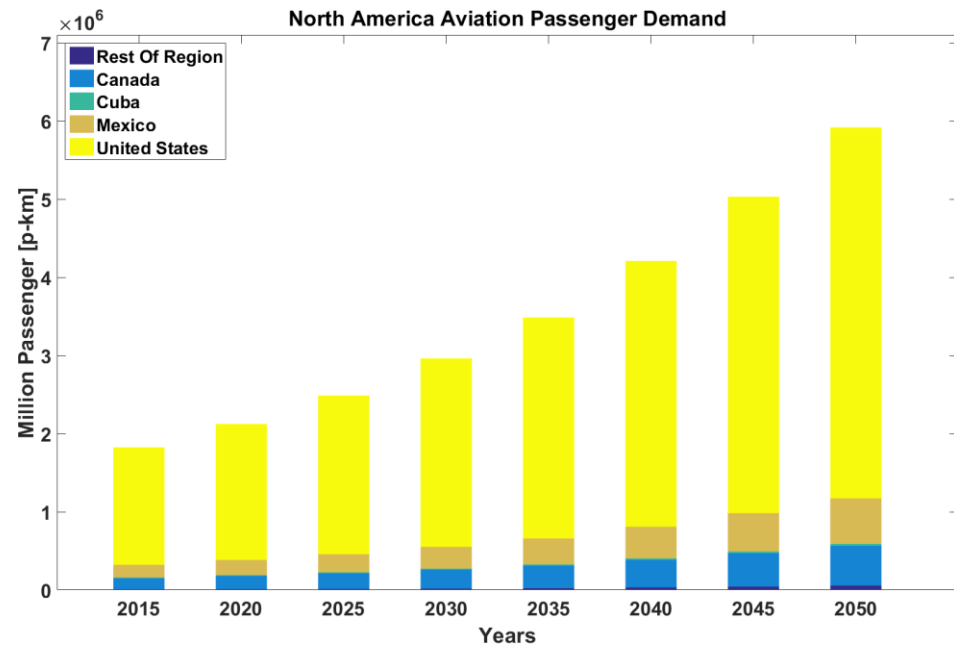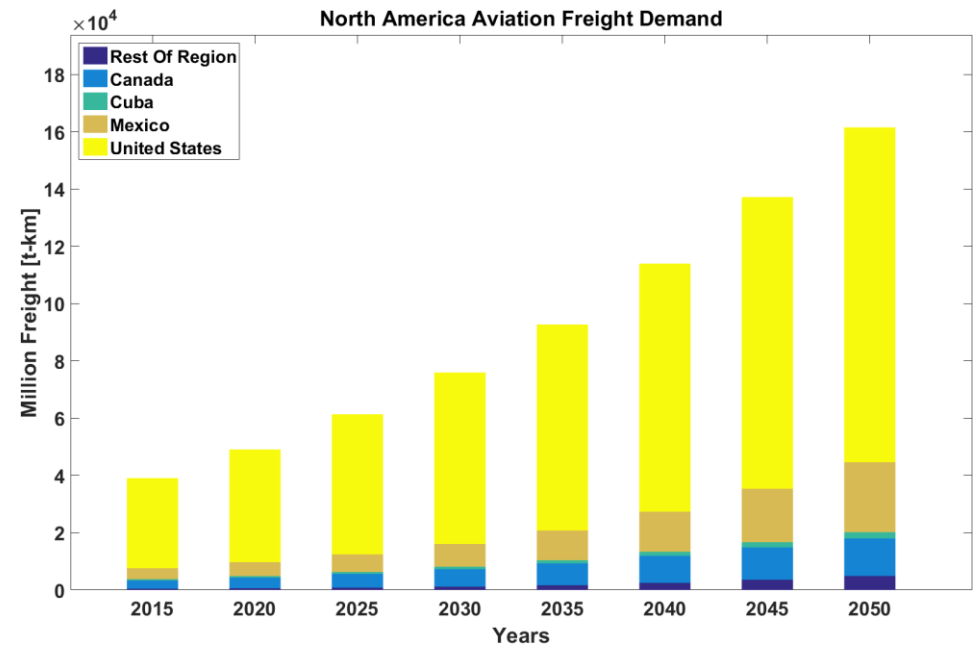



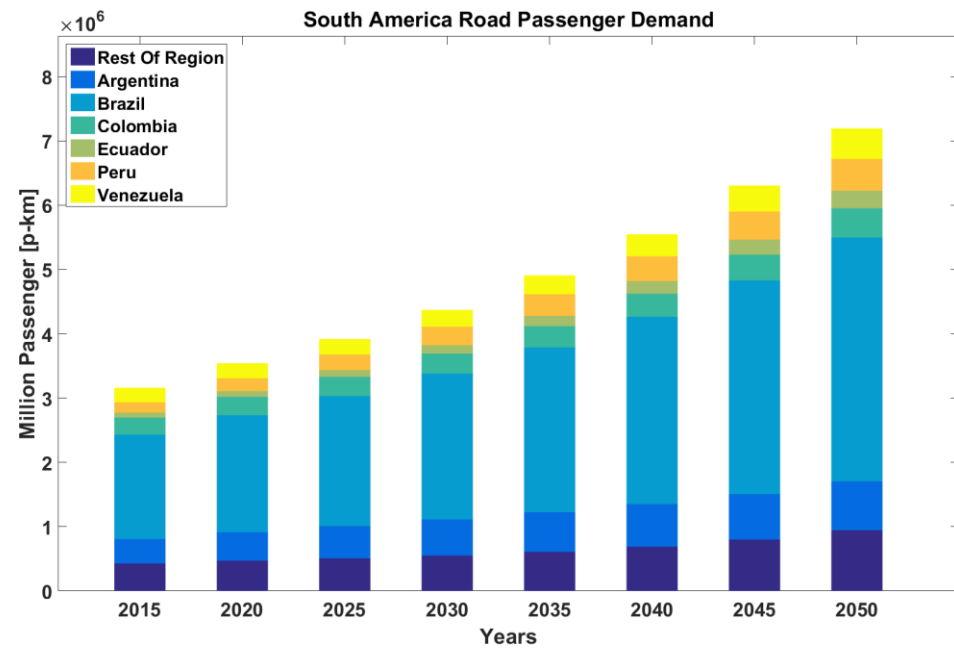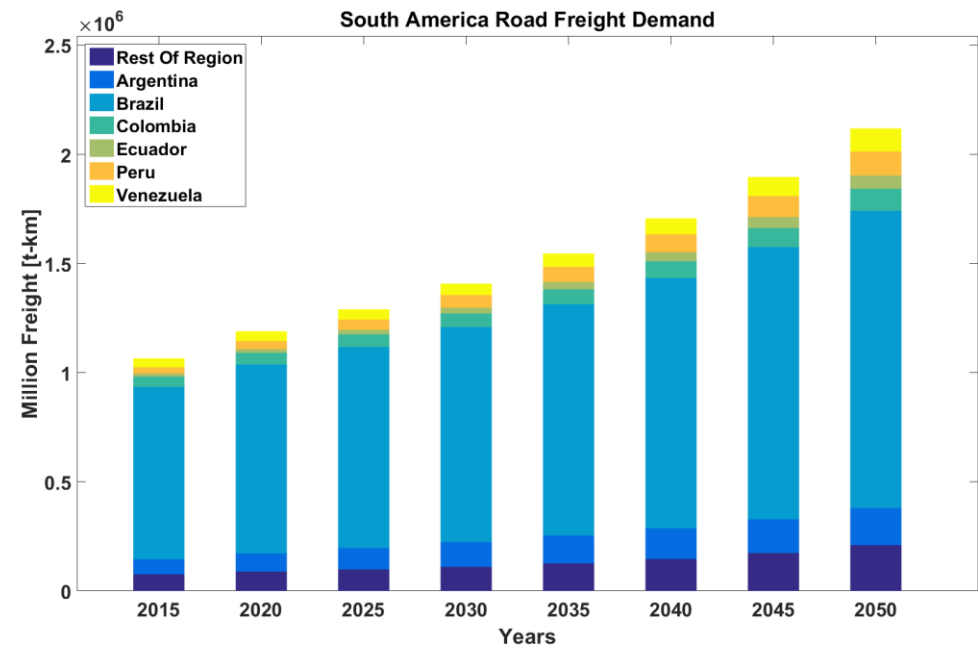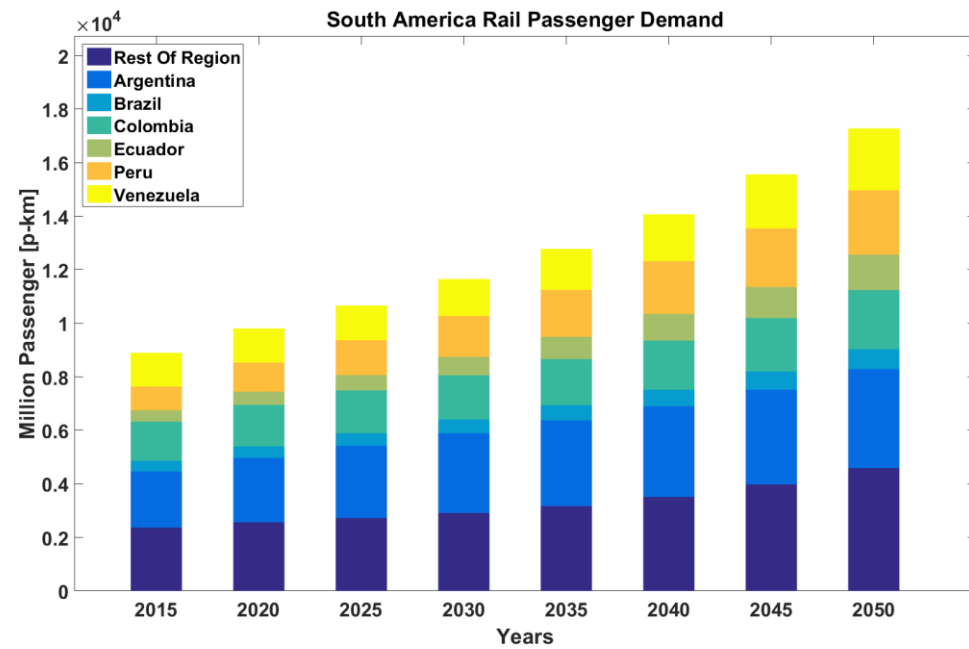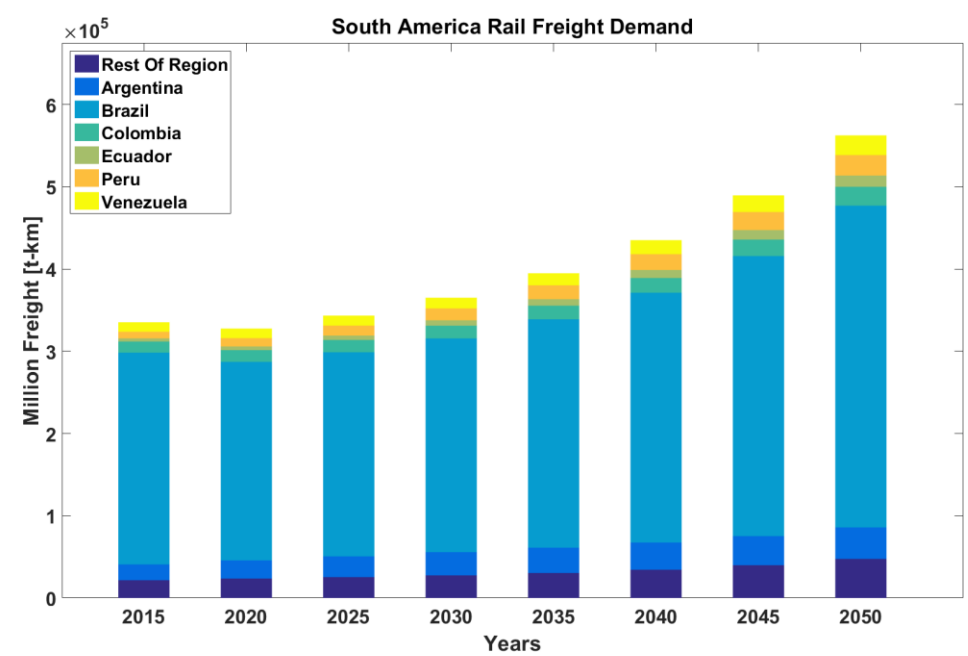

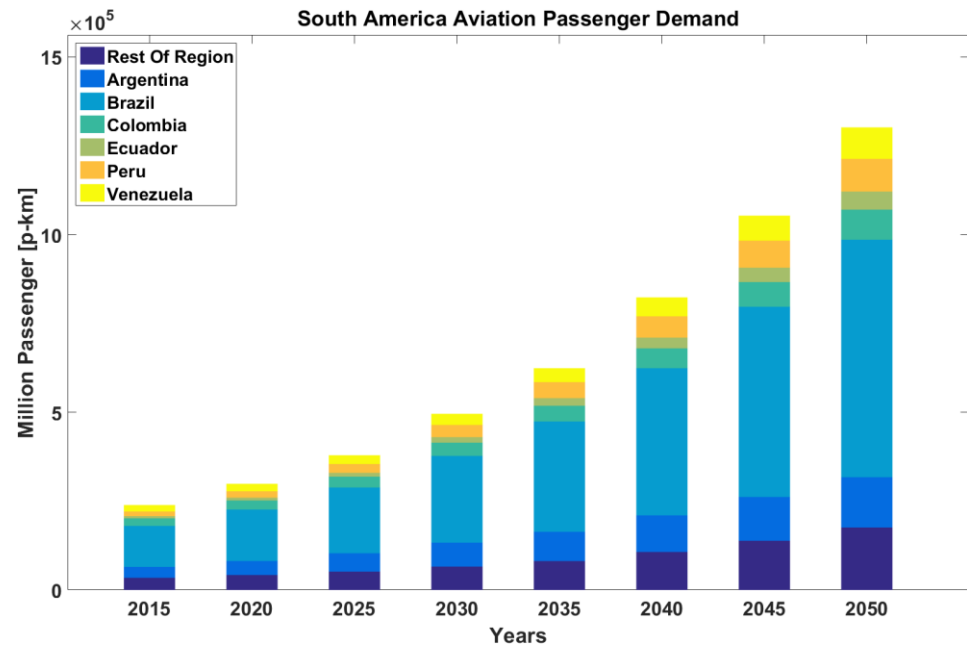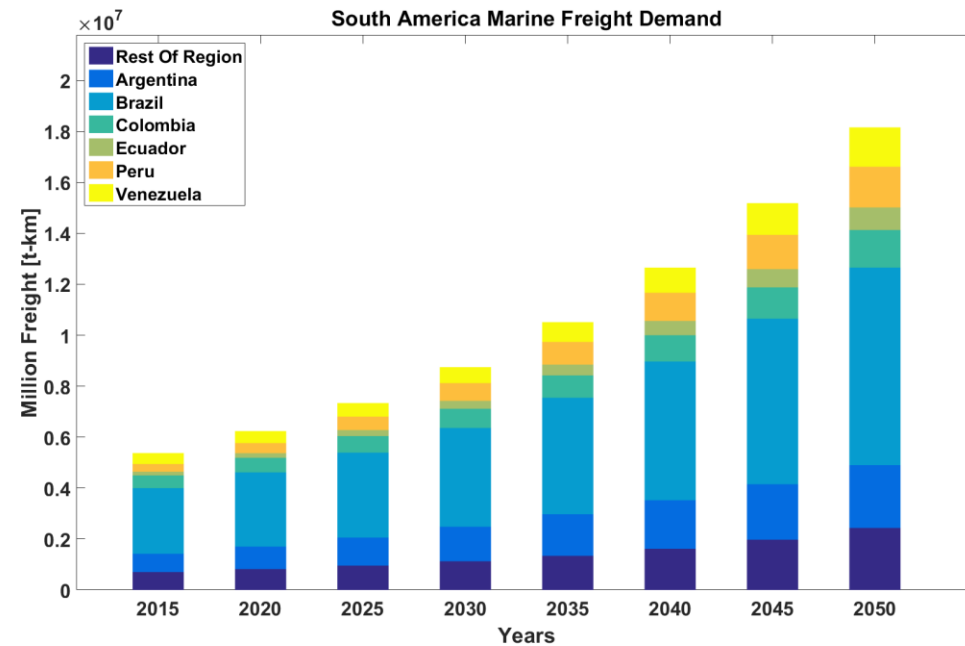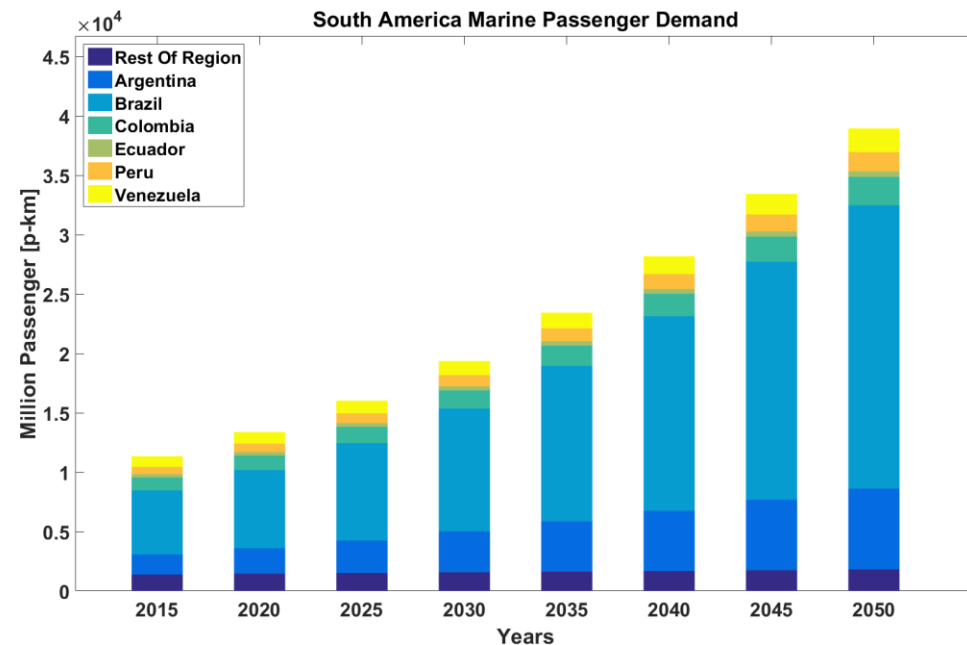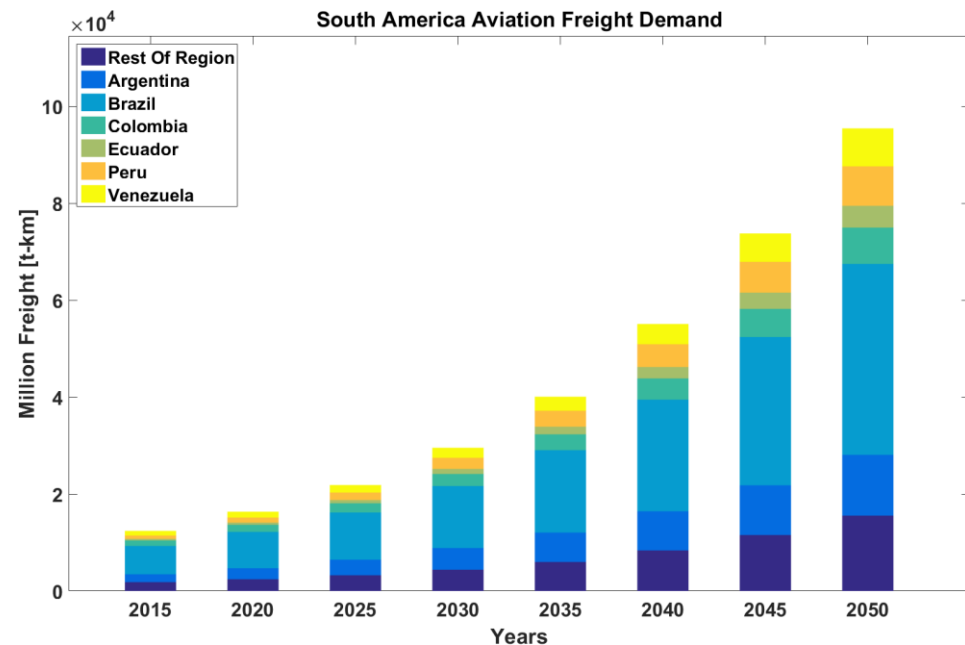

# Countries

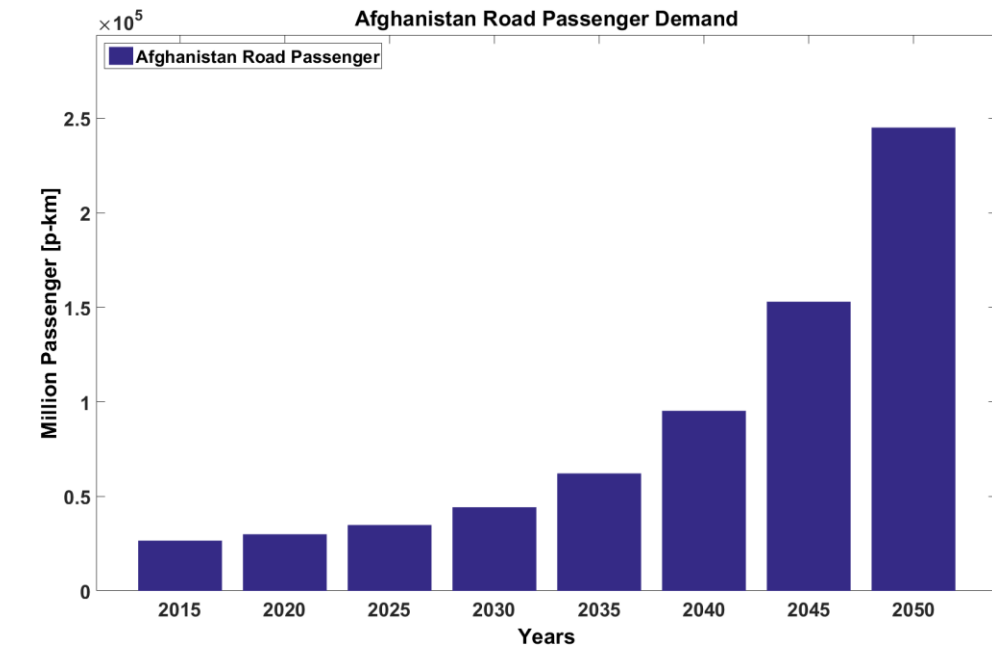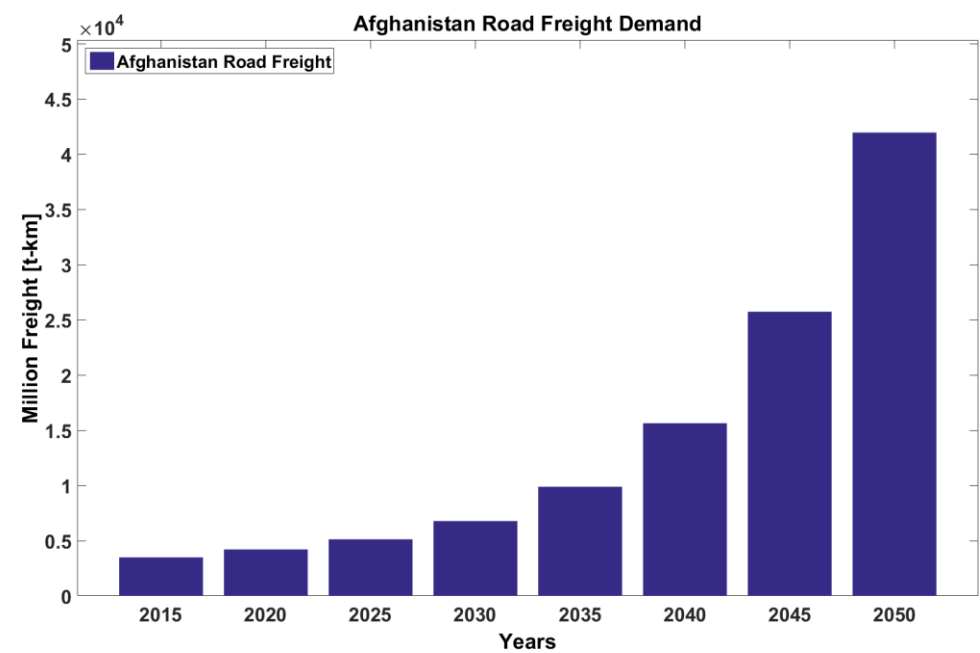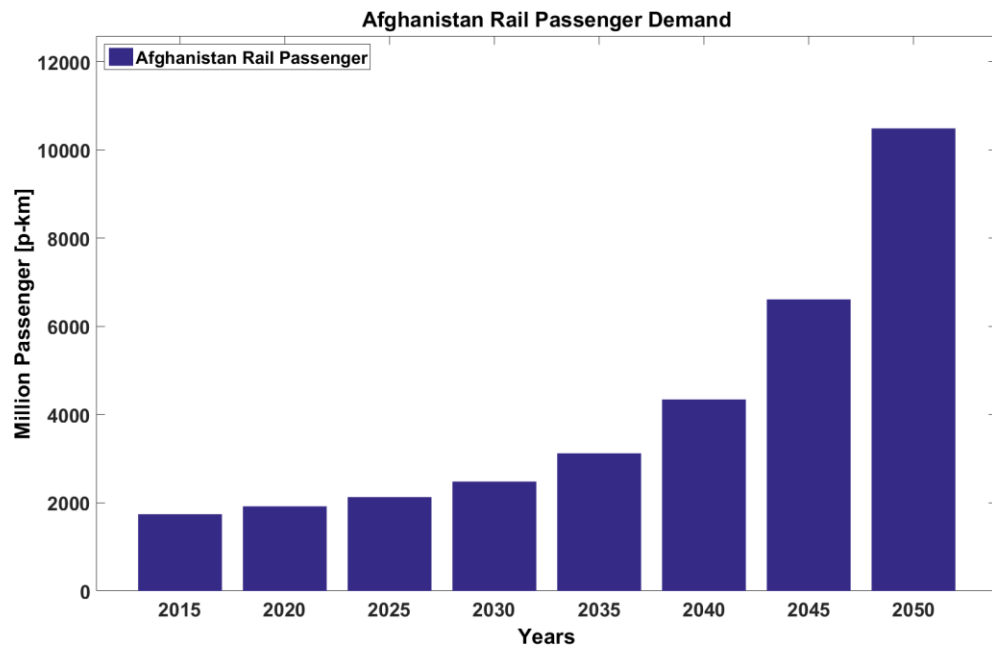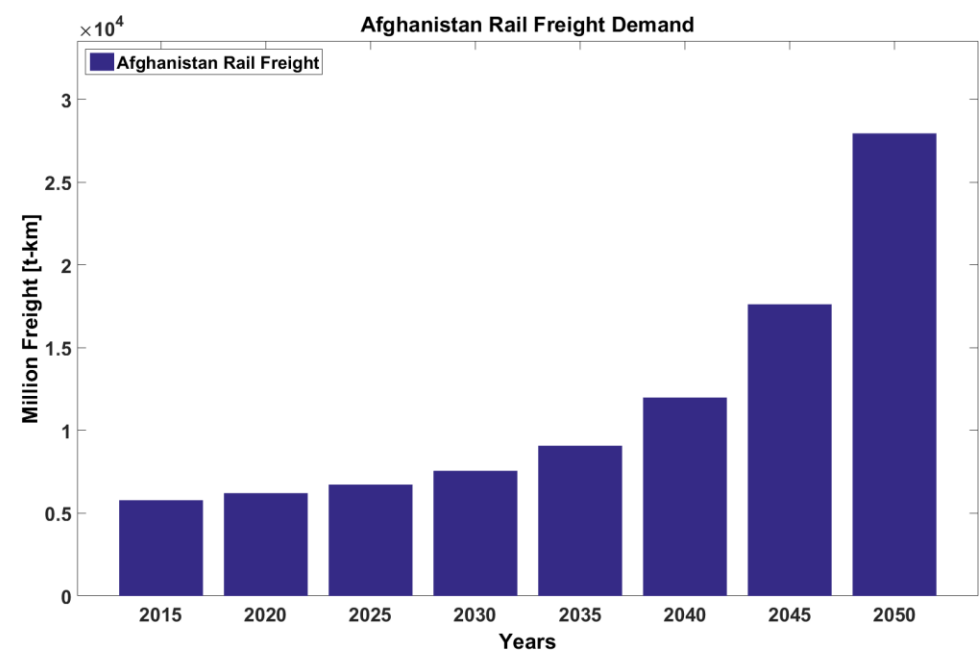

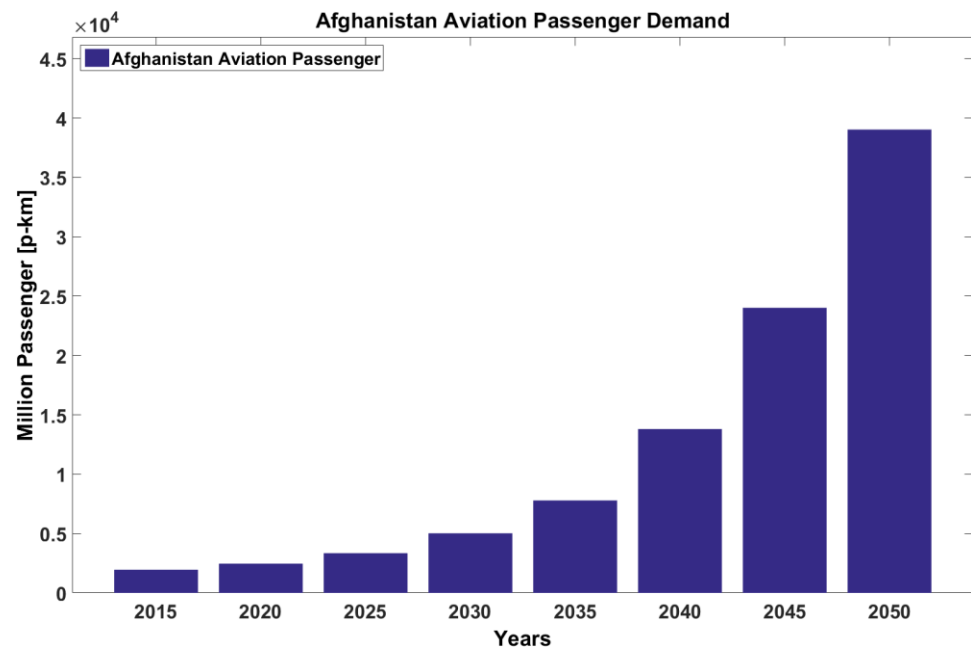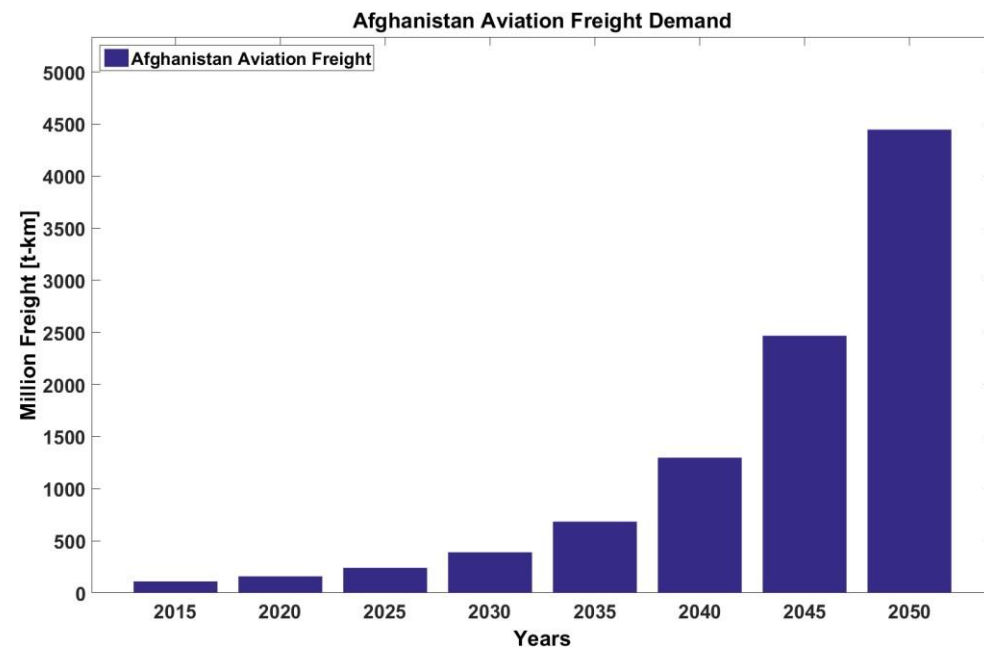

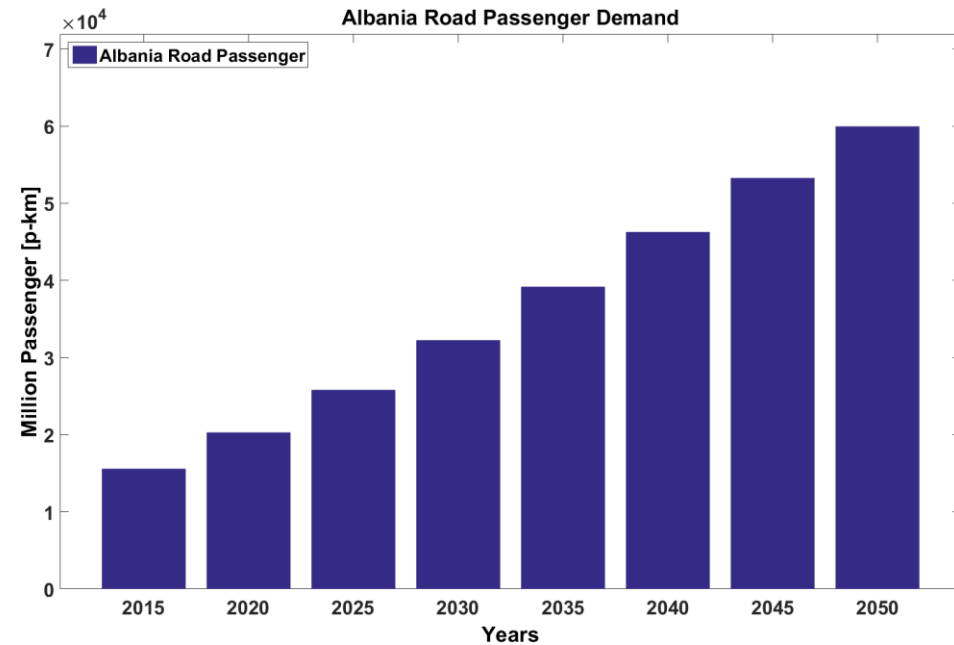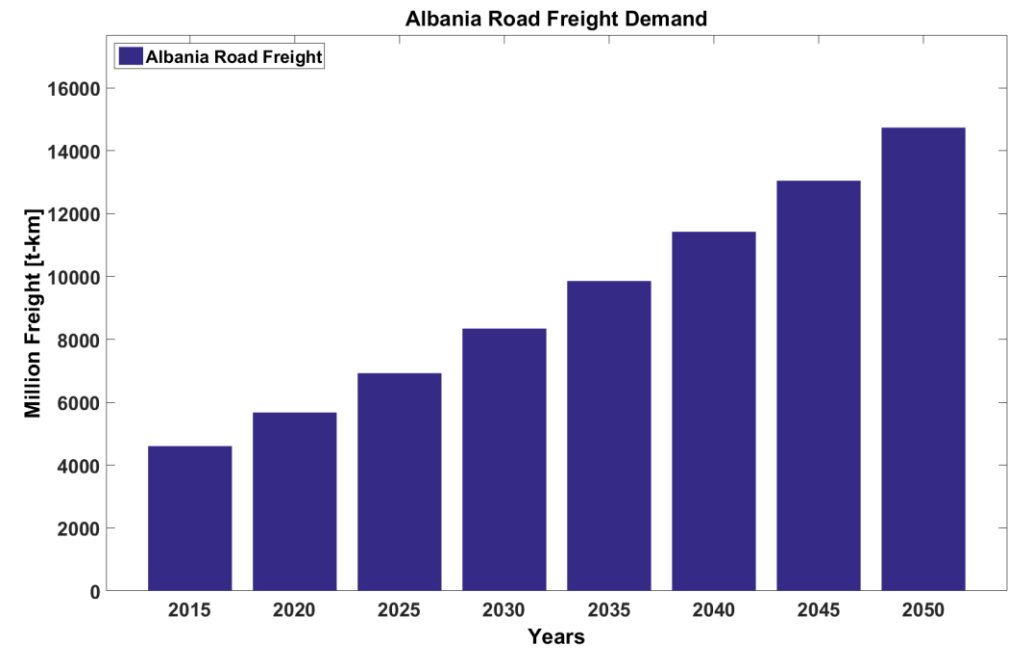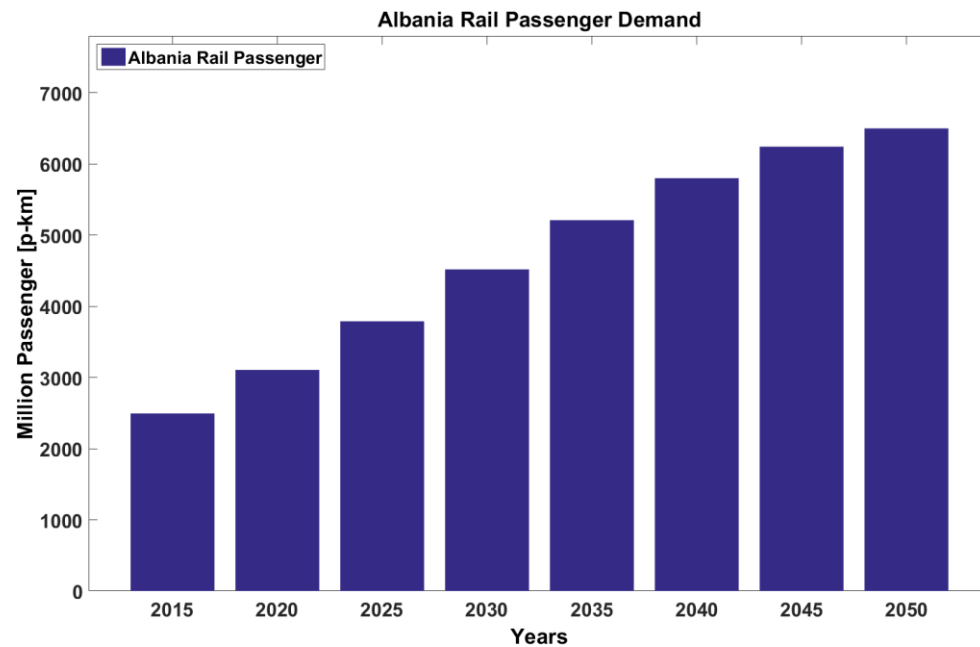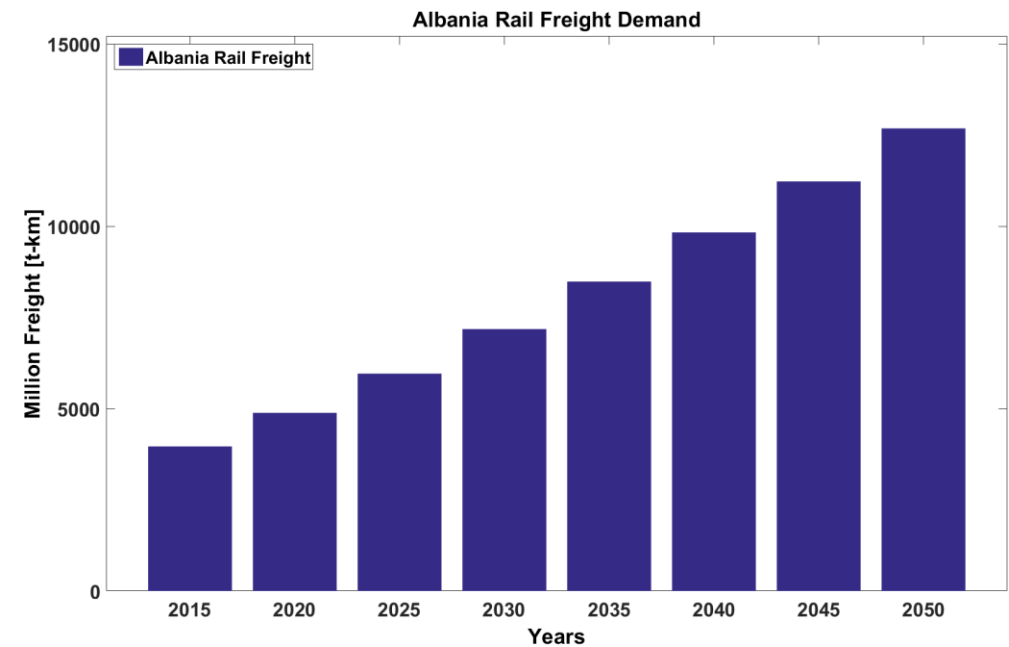

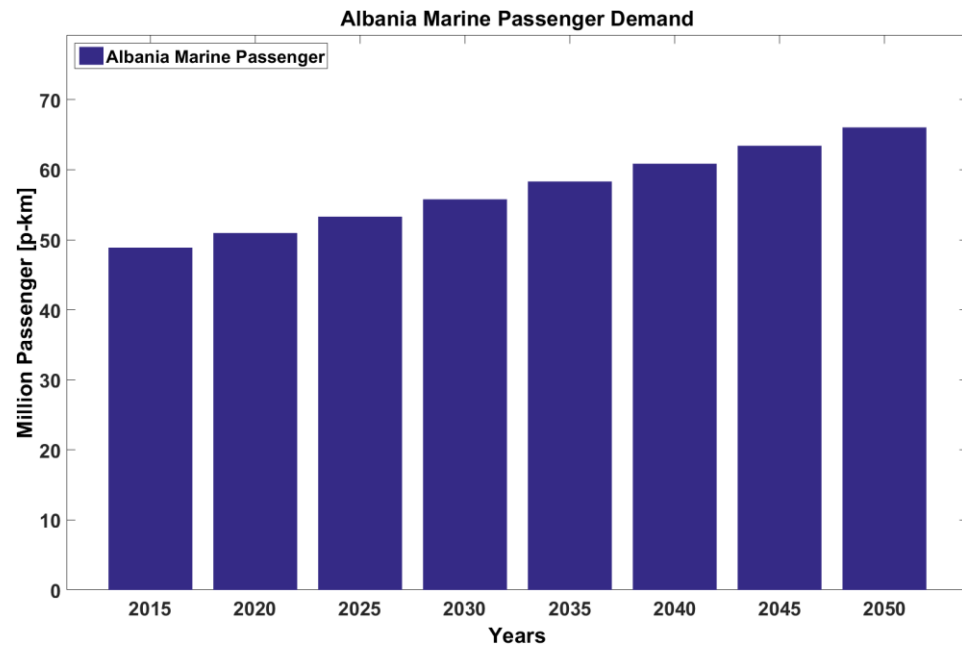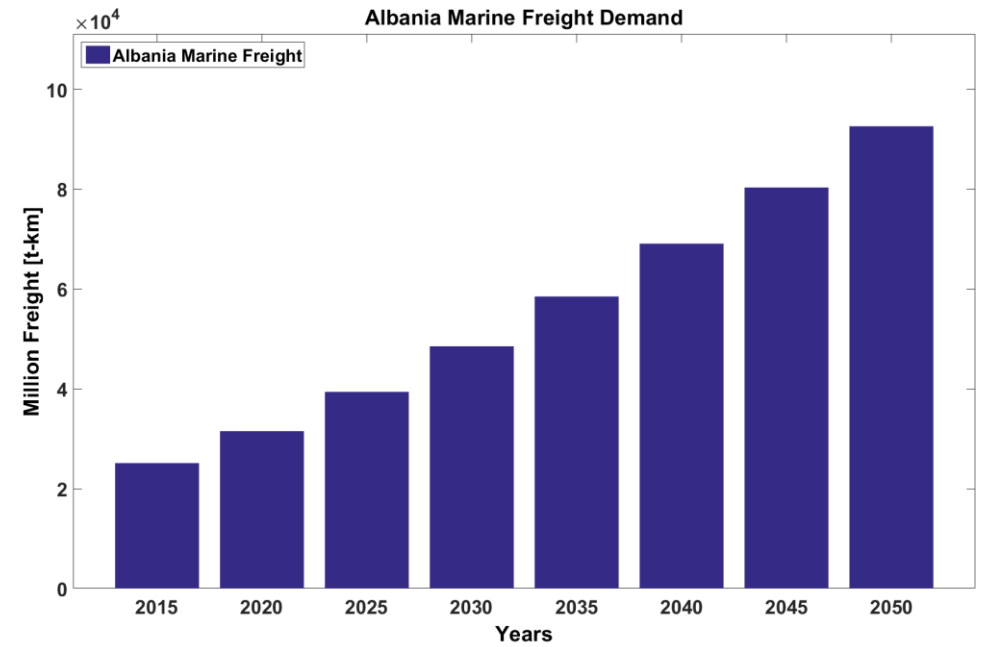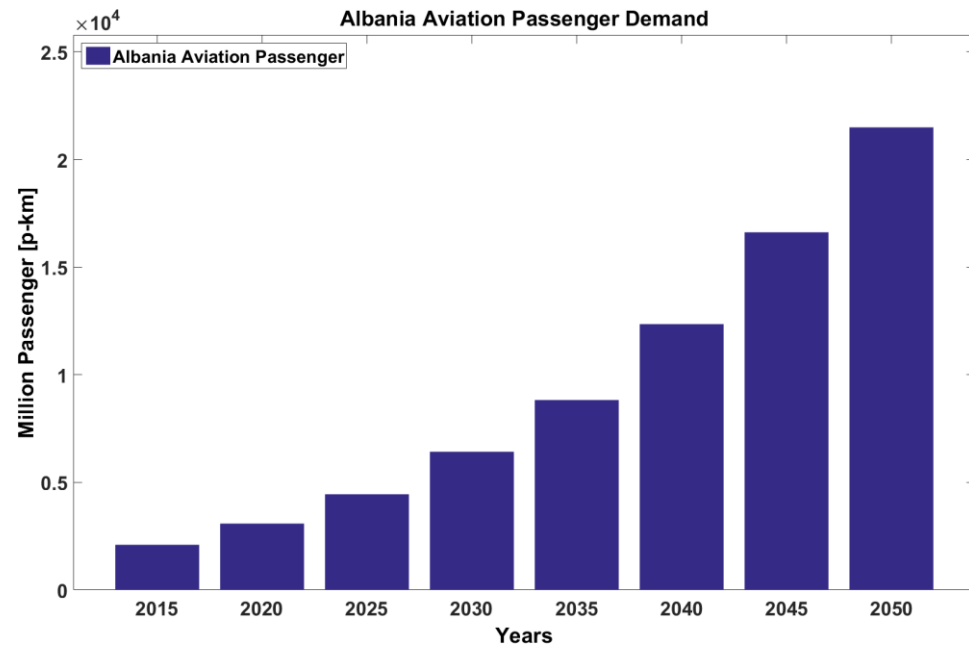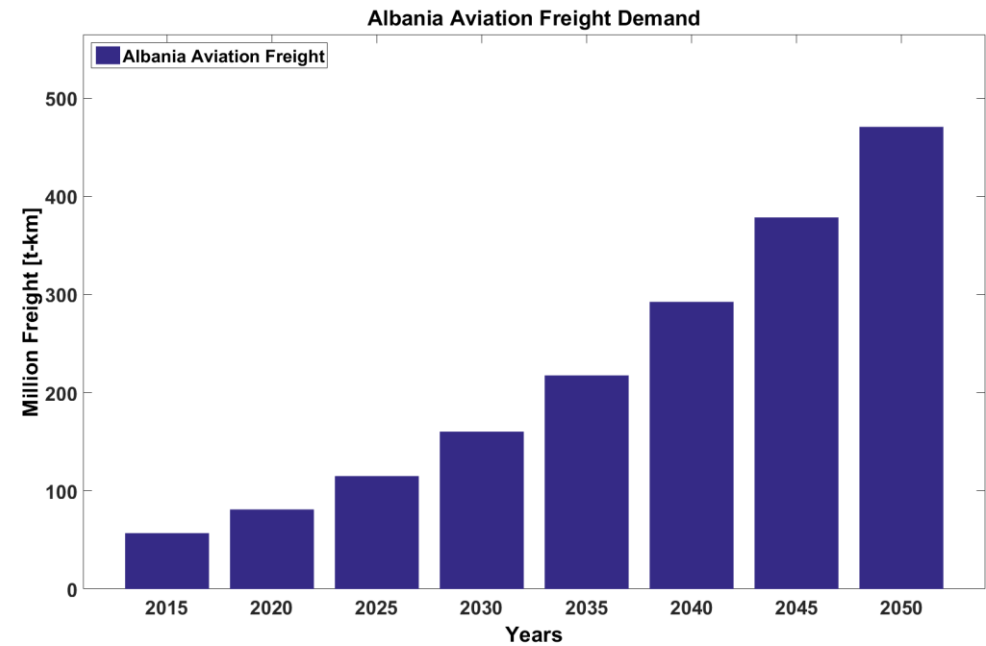

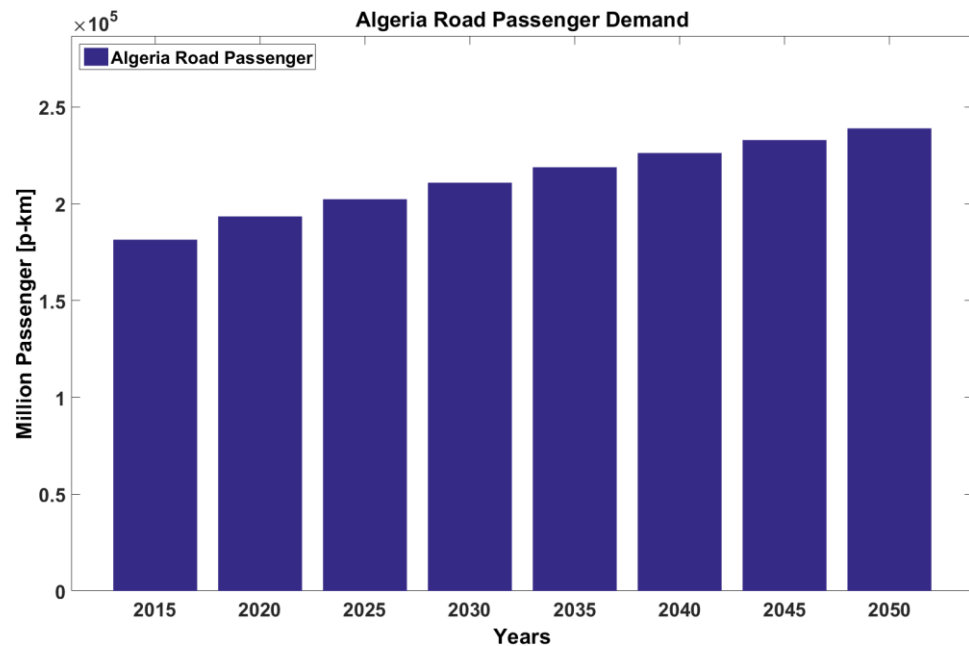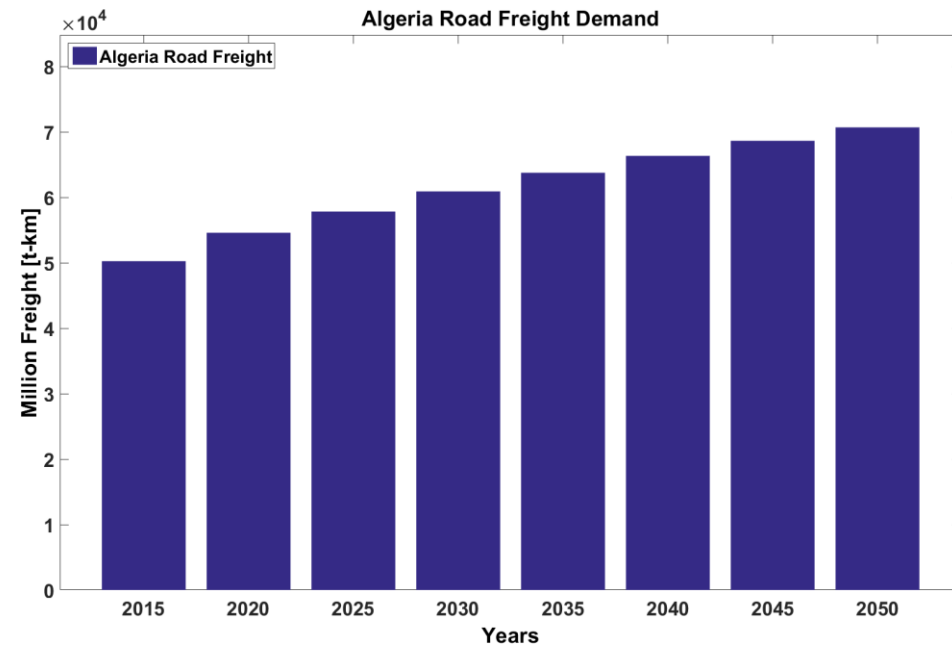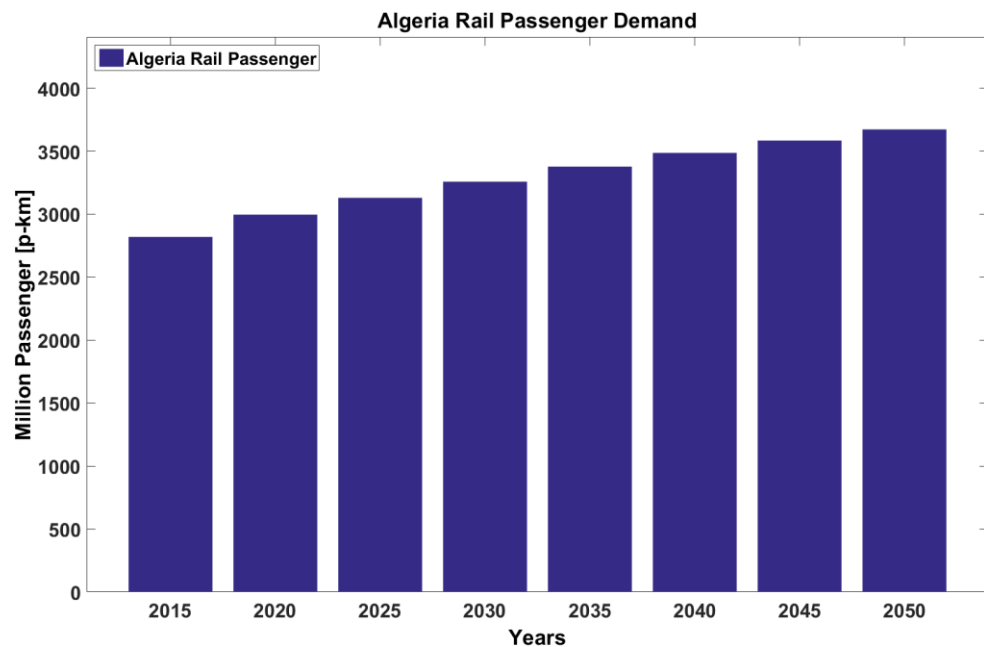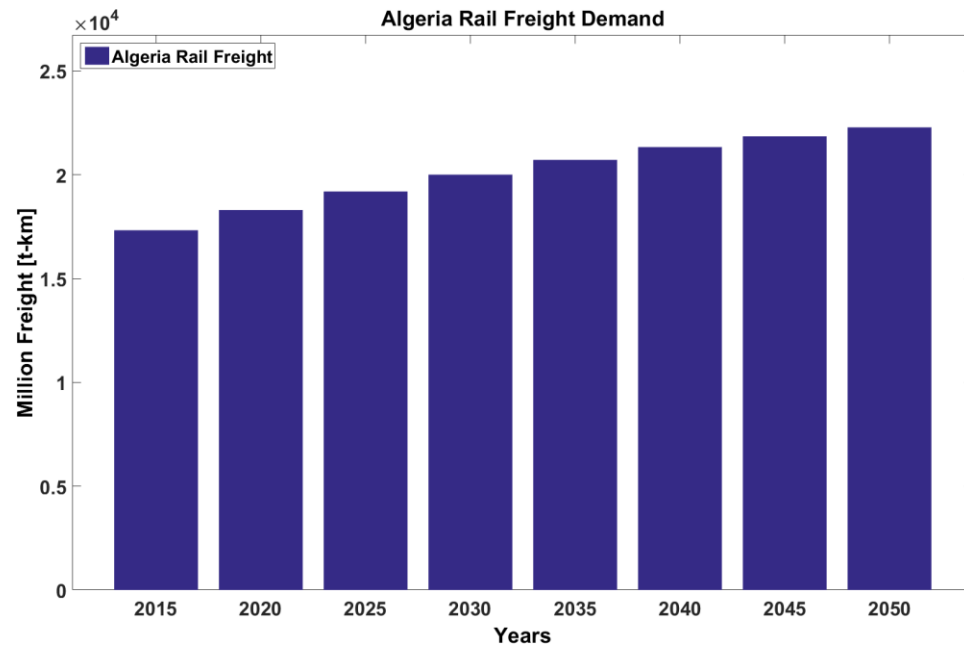



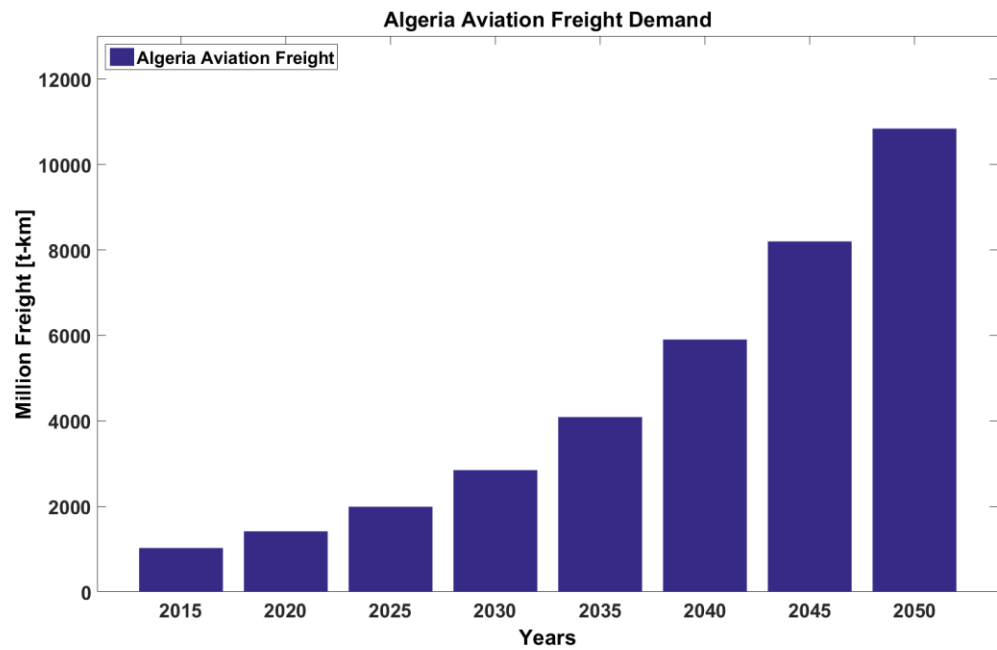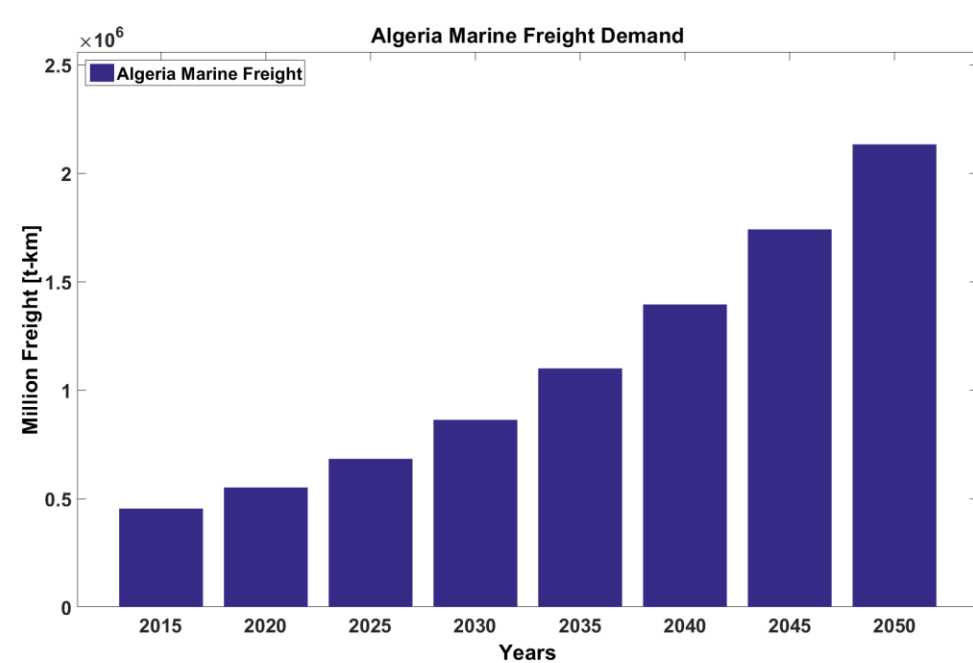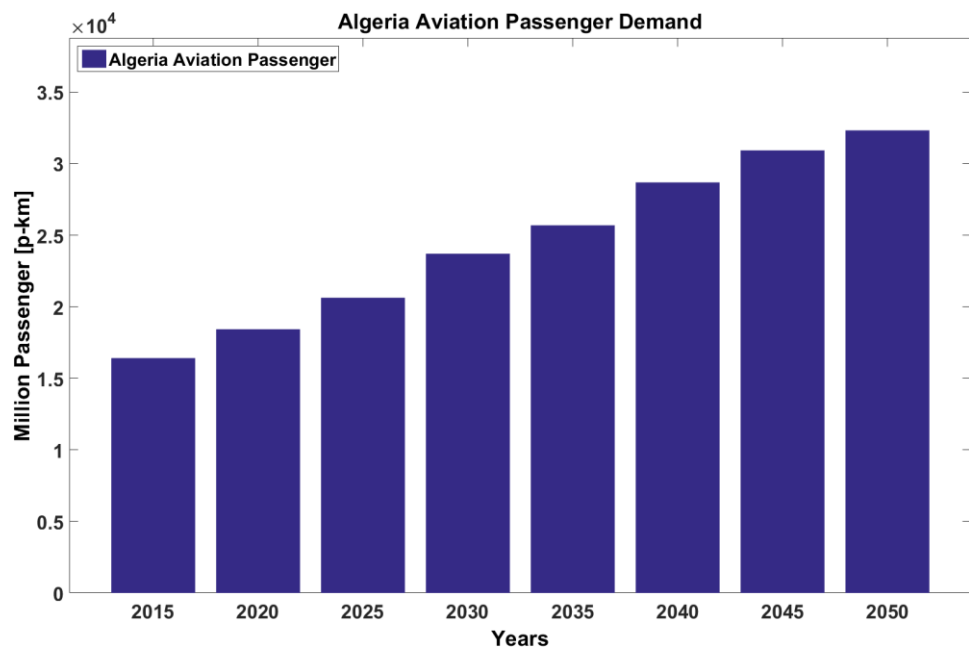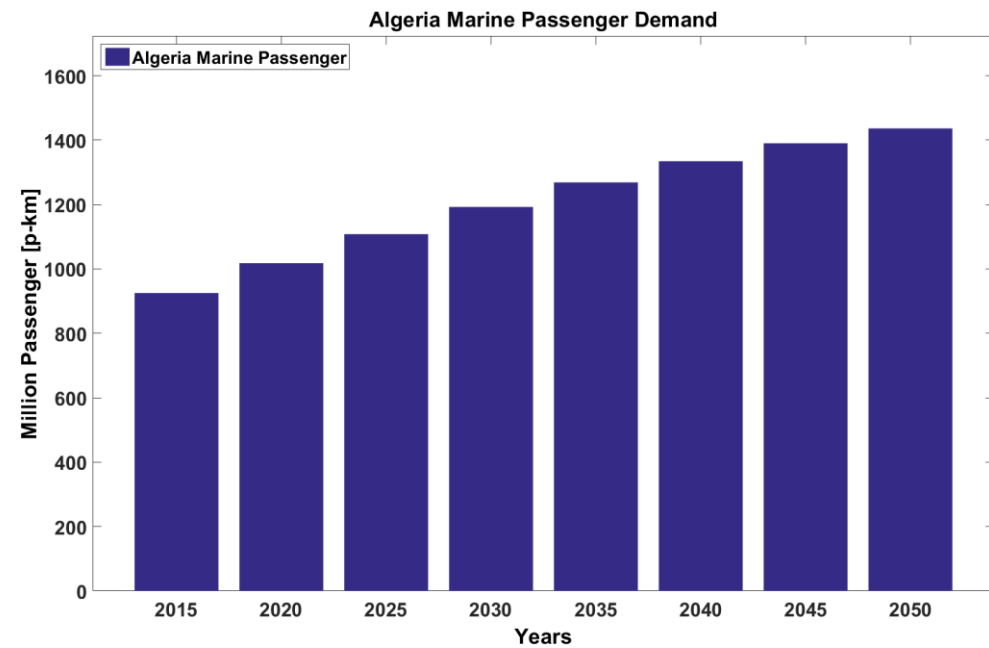

### Andorra Road Passenger Demand

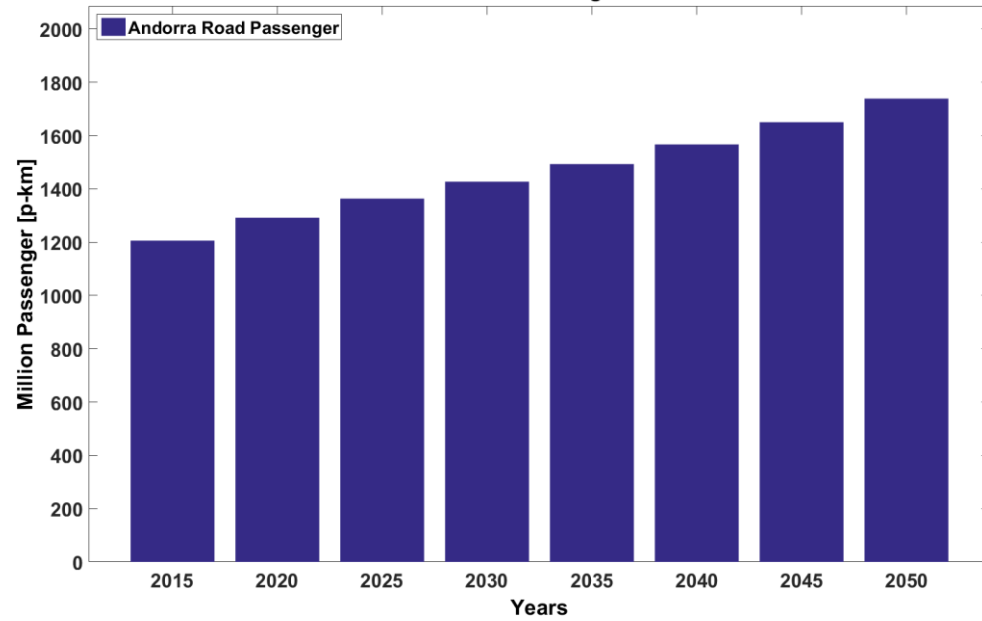

### Andorra Road Freight Demand

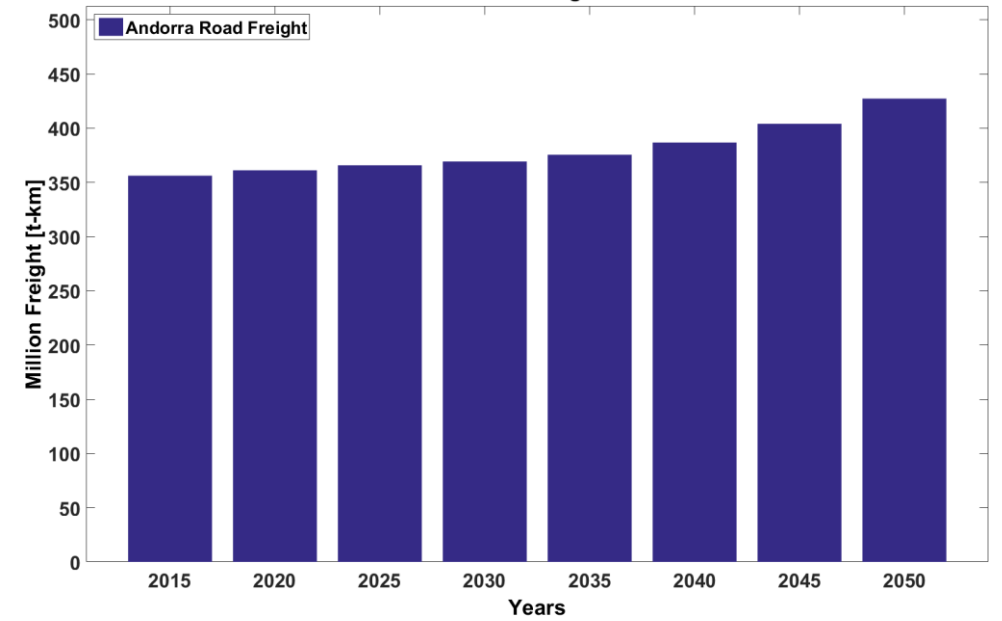

### Andorra Rail Passenger Demand

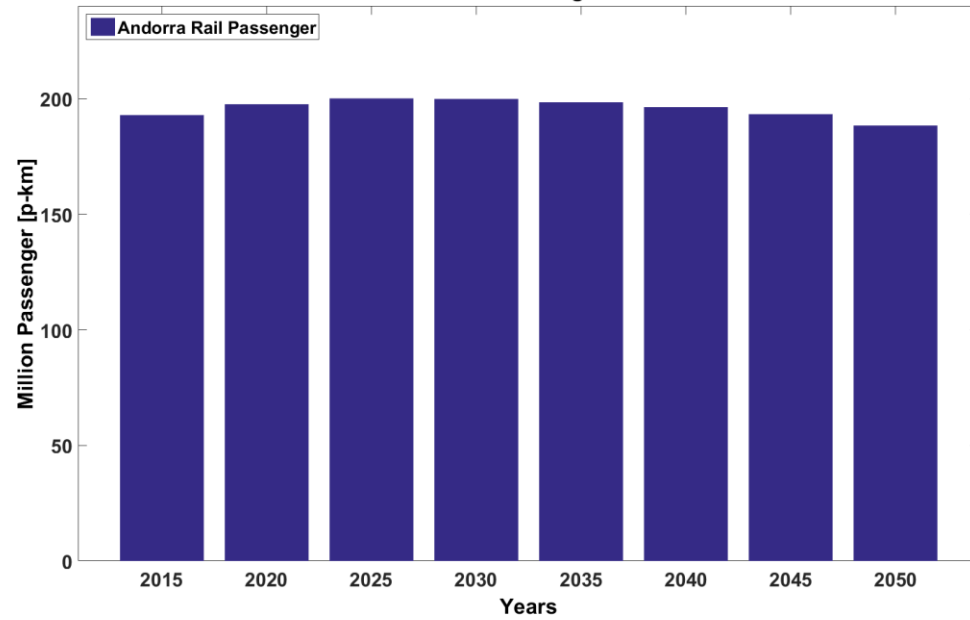

### Andorra Rail Freight Demand

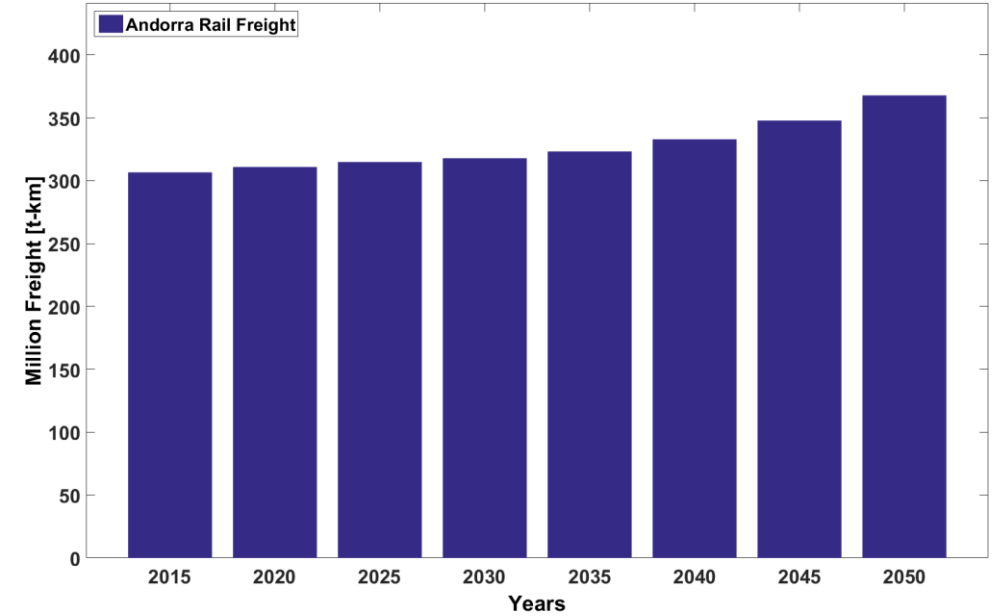

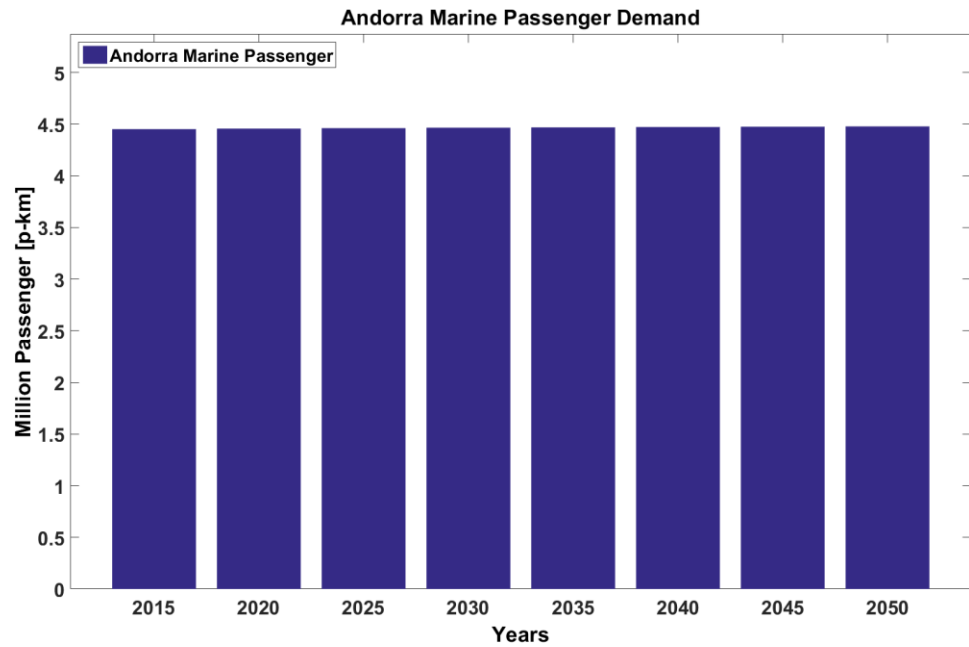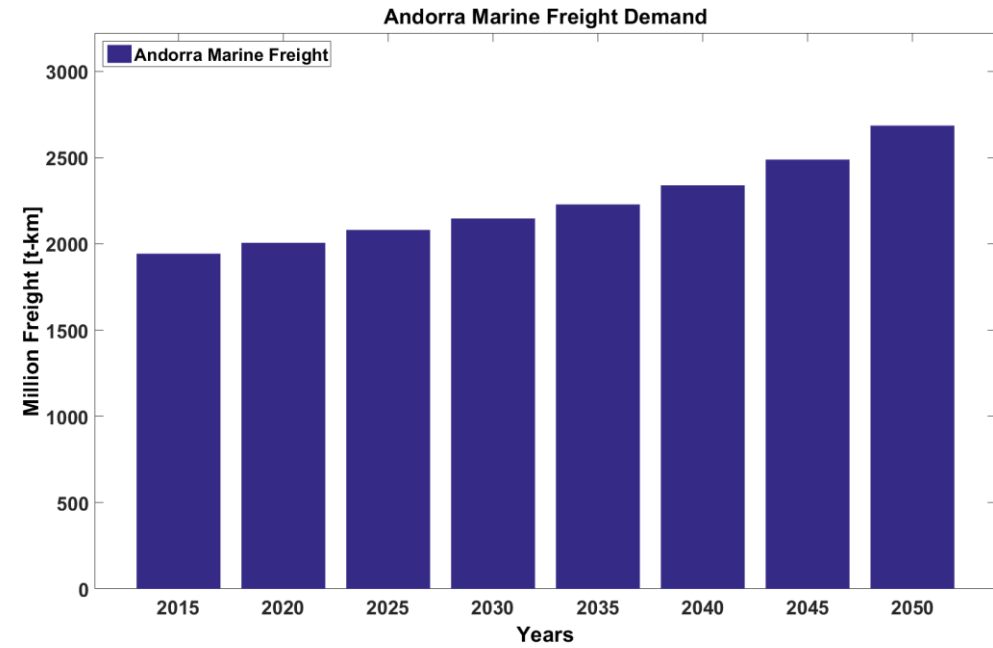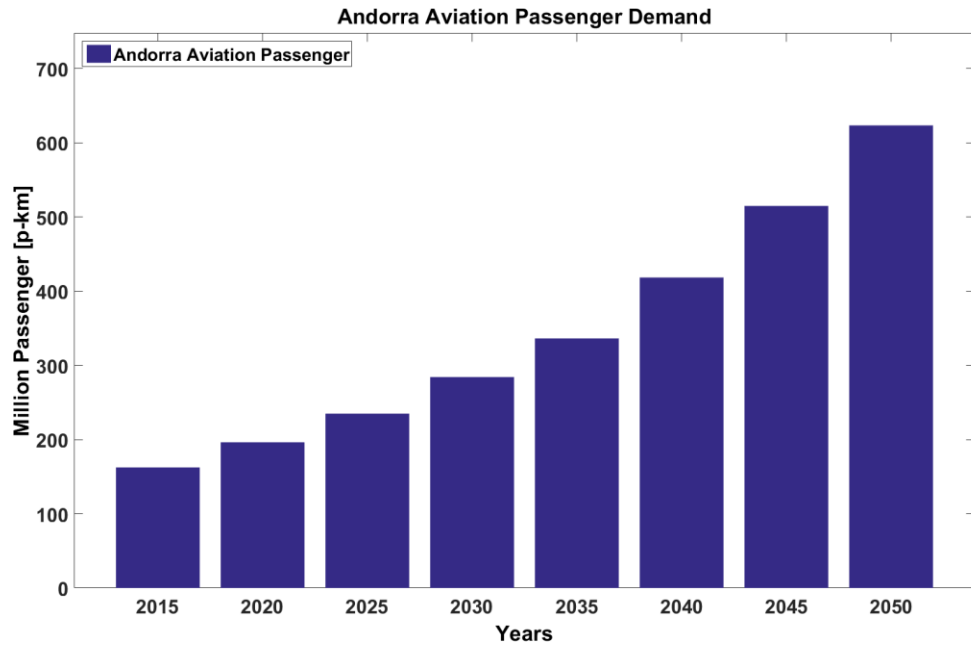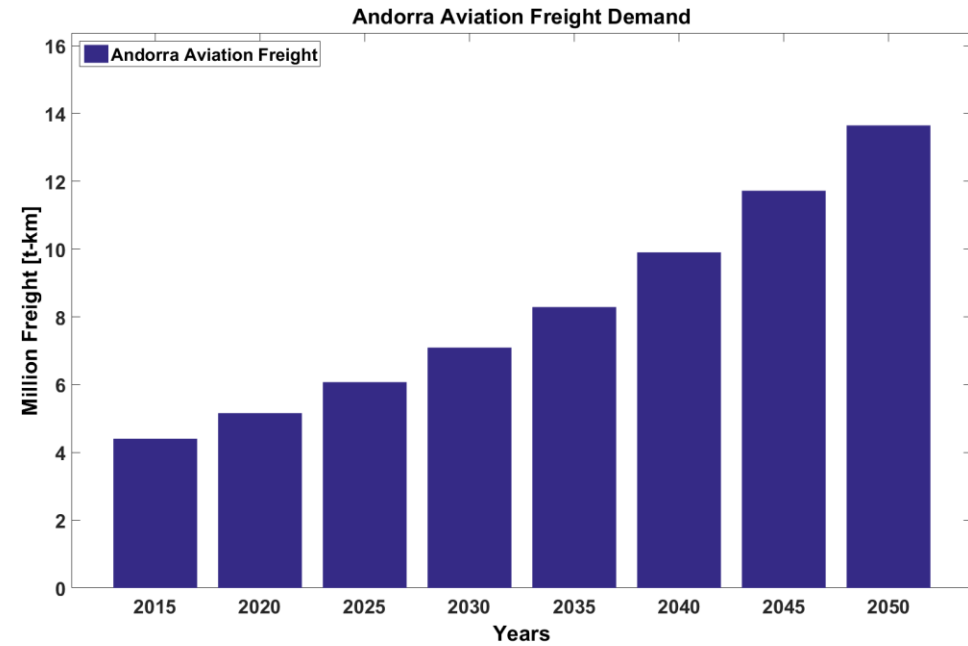

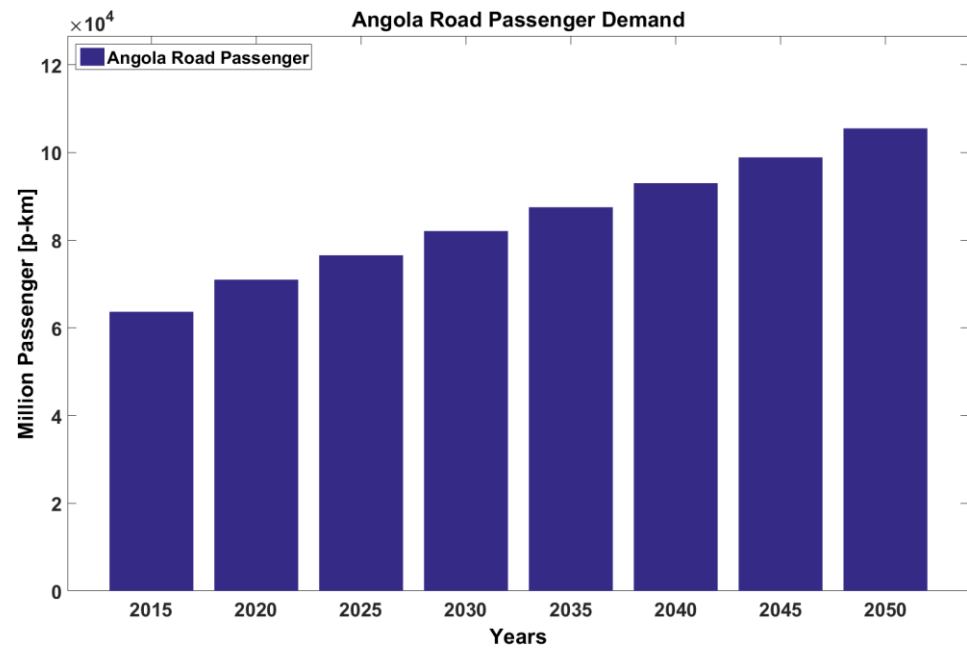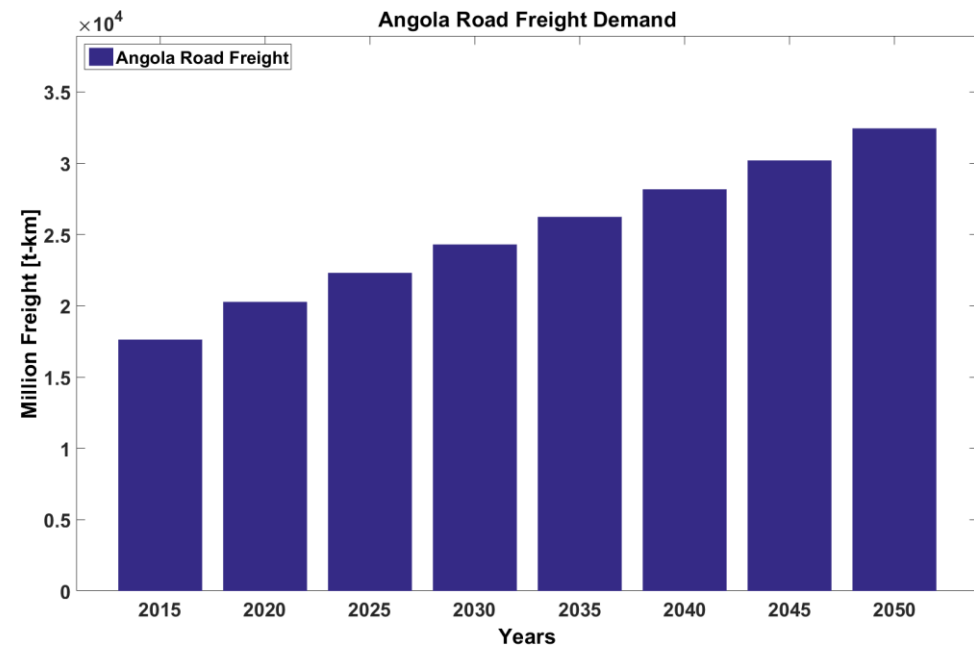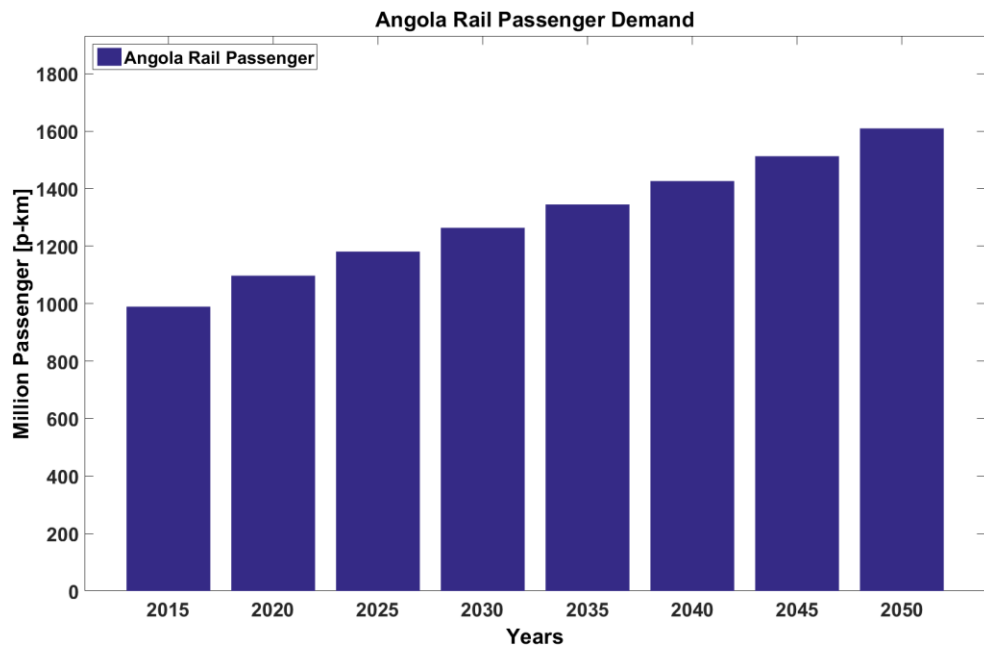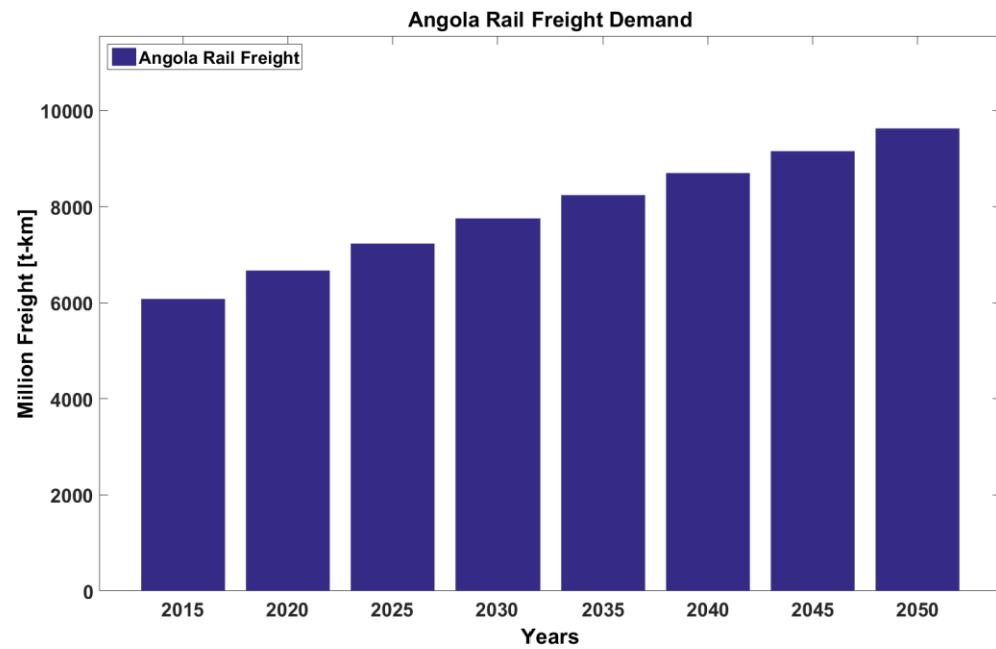

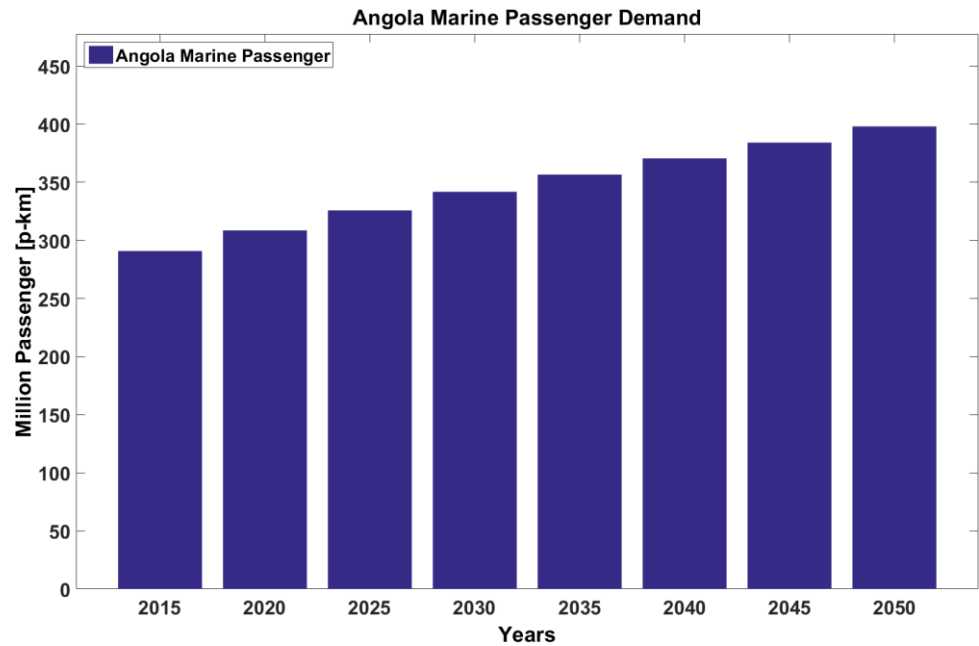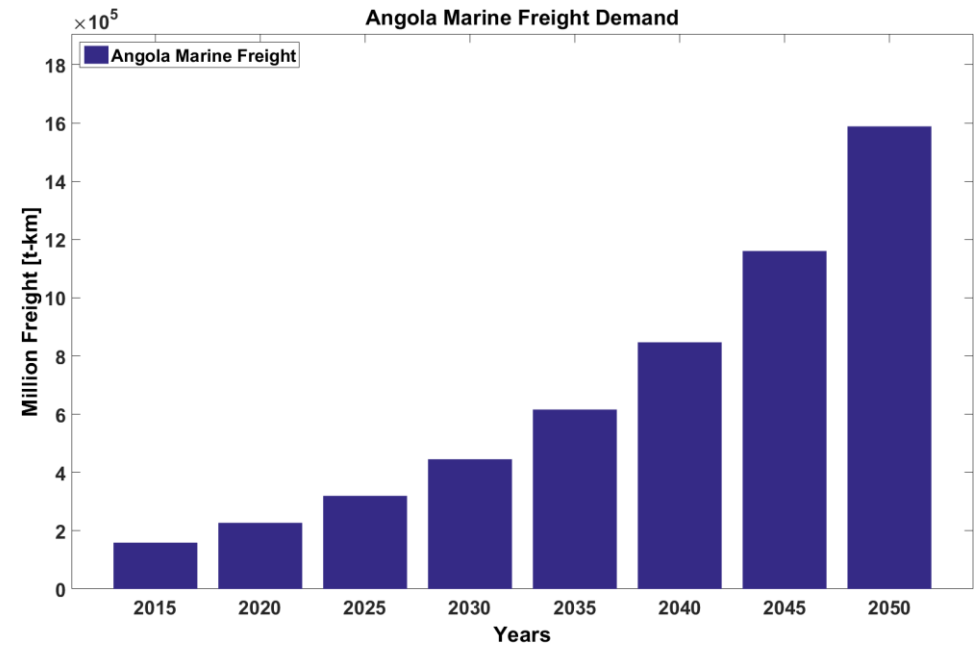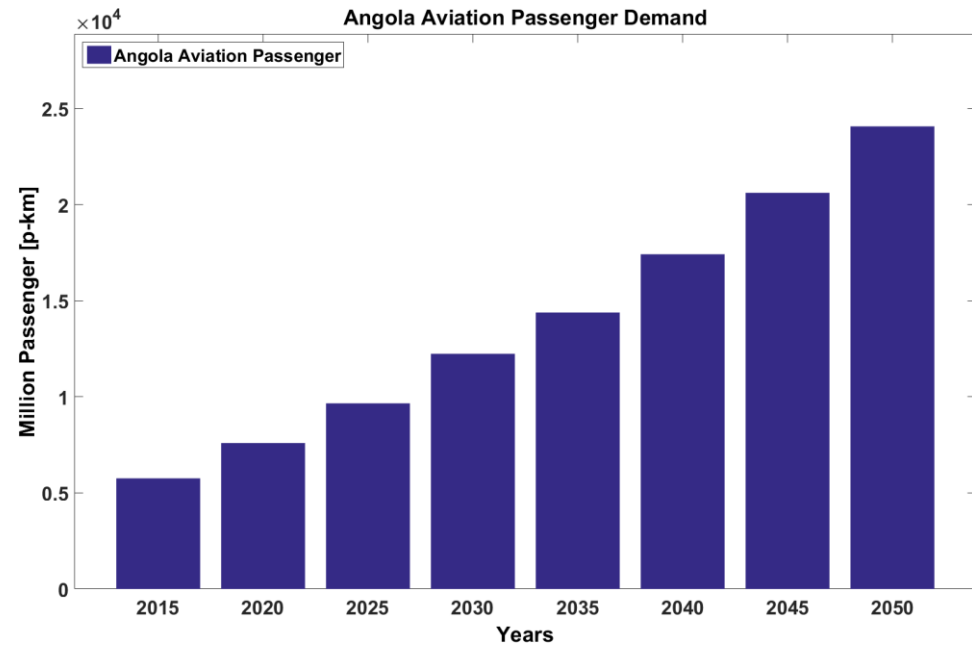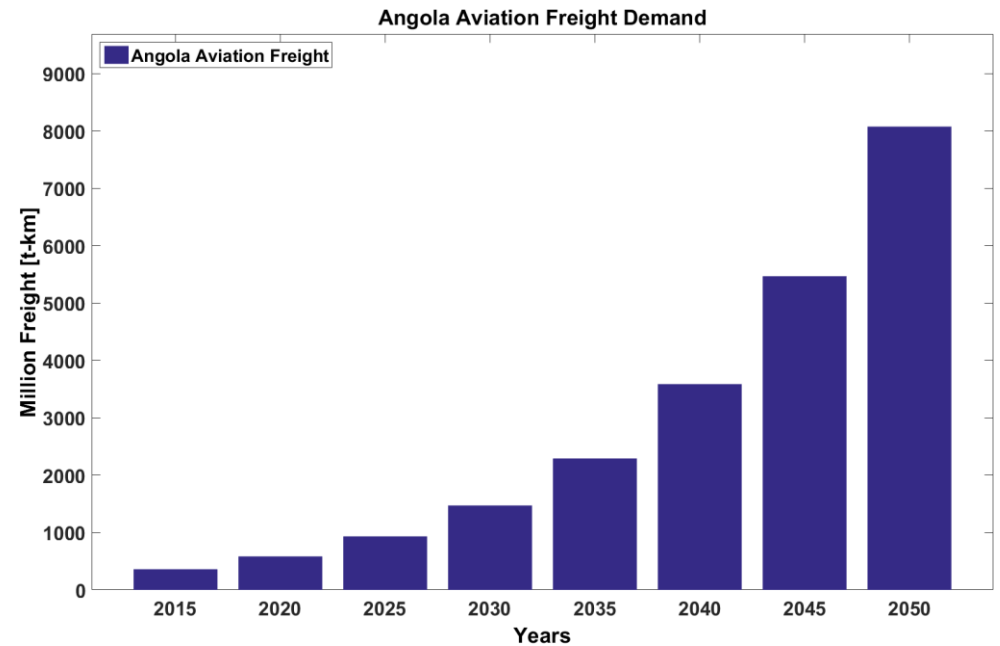

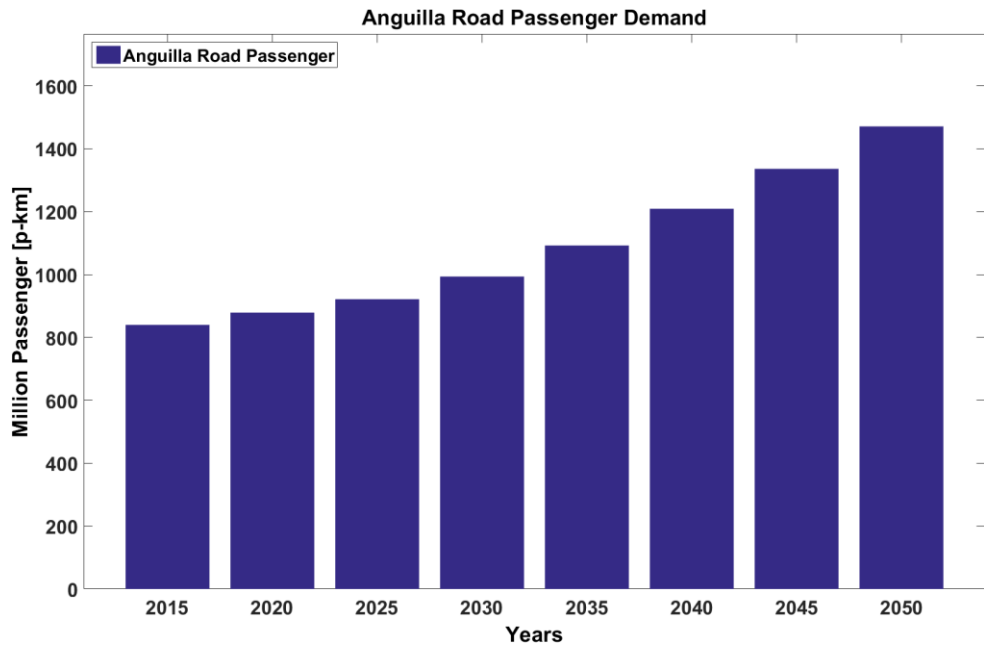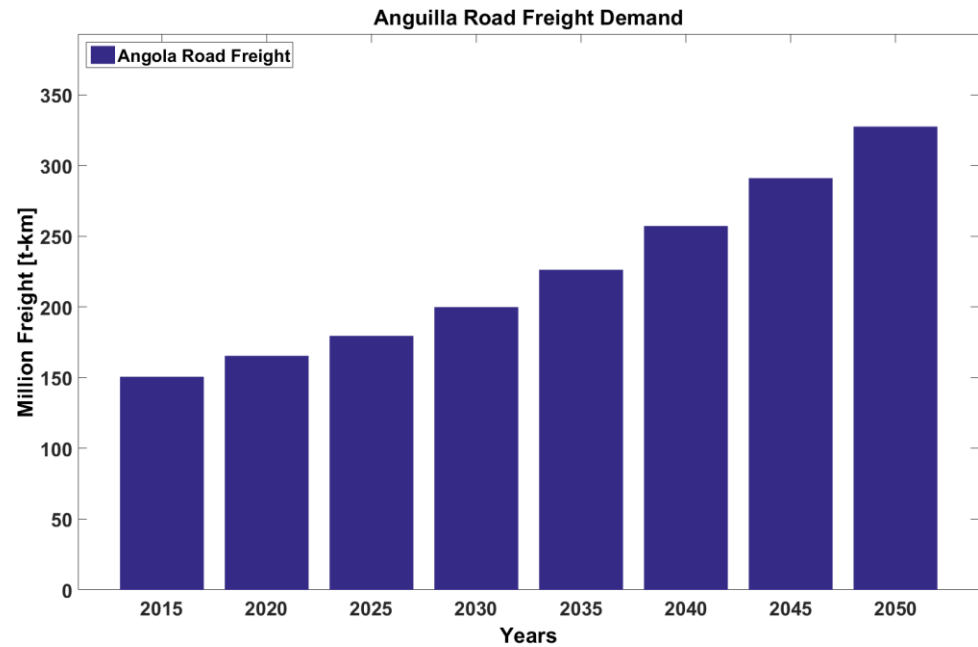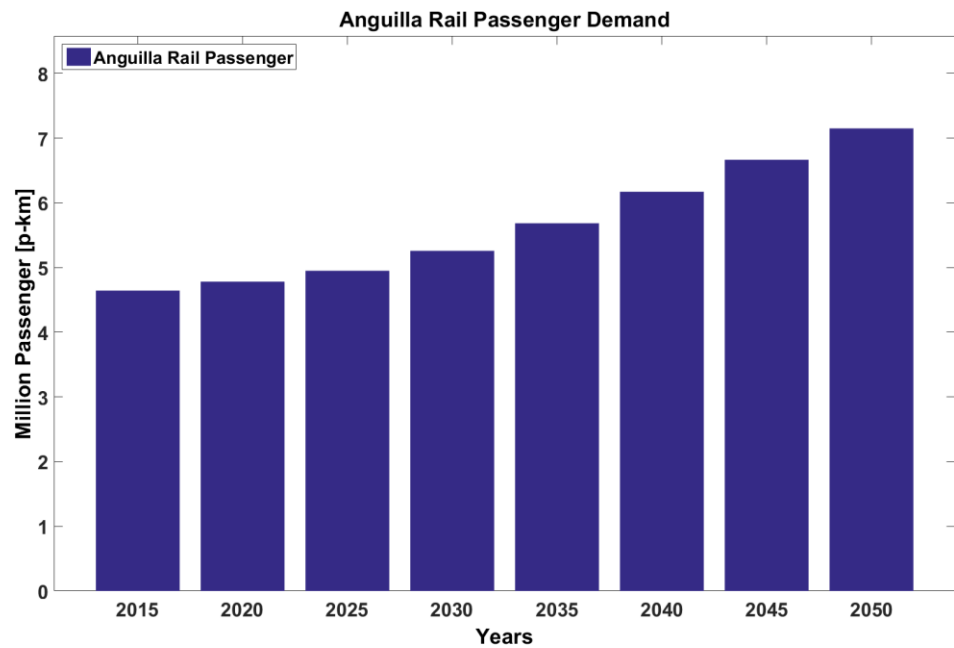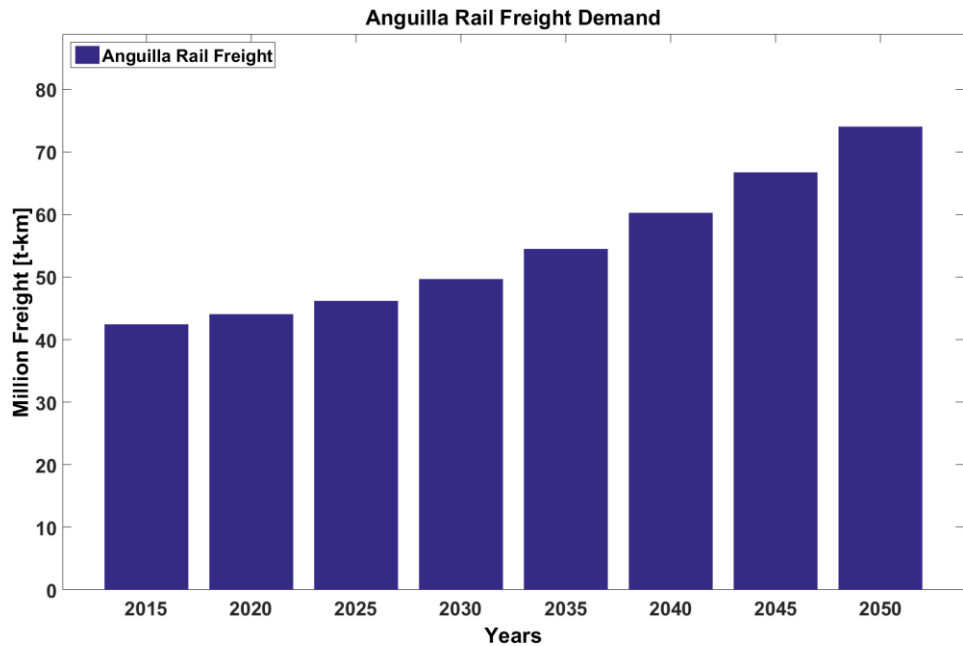

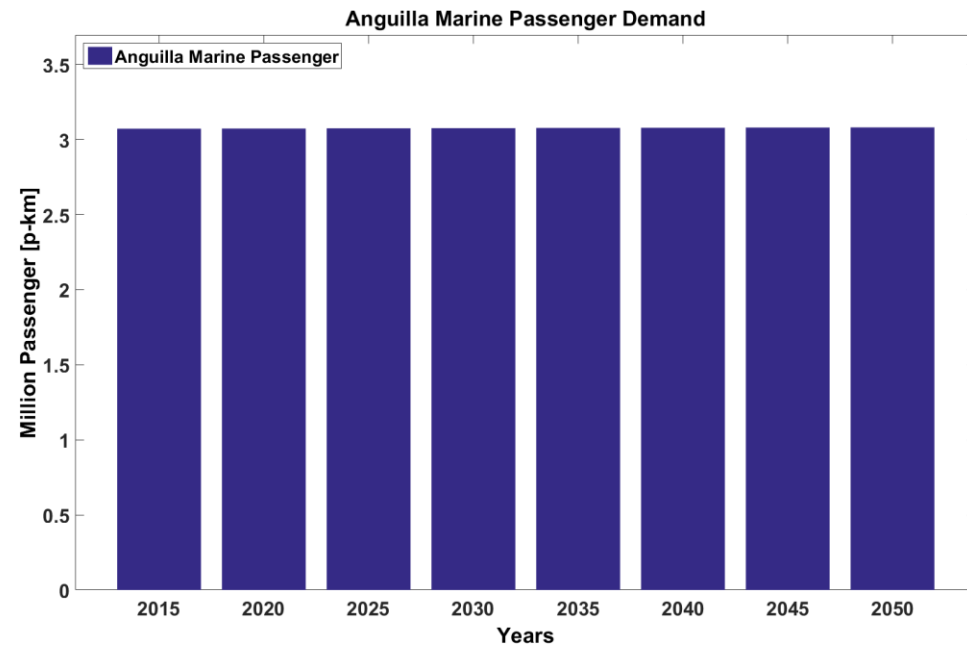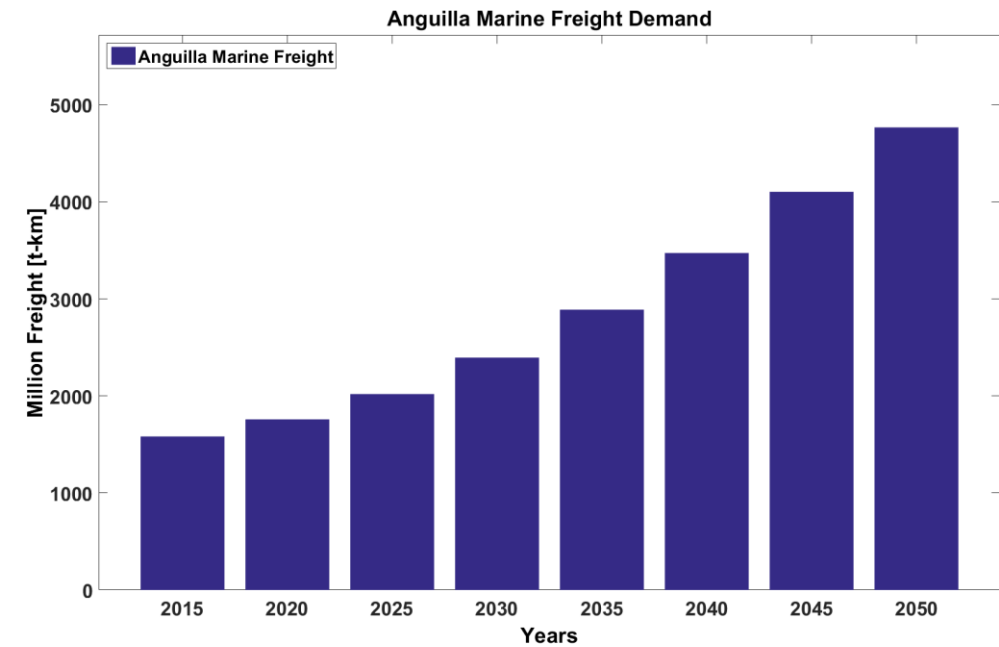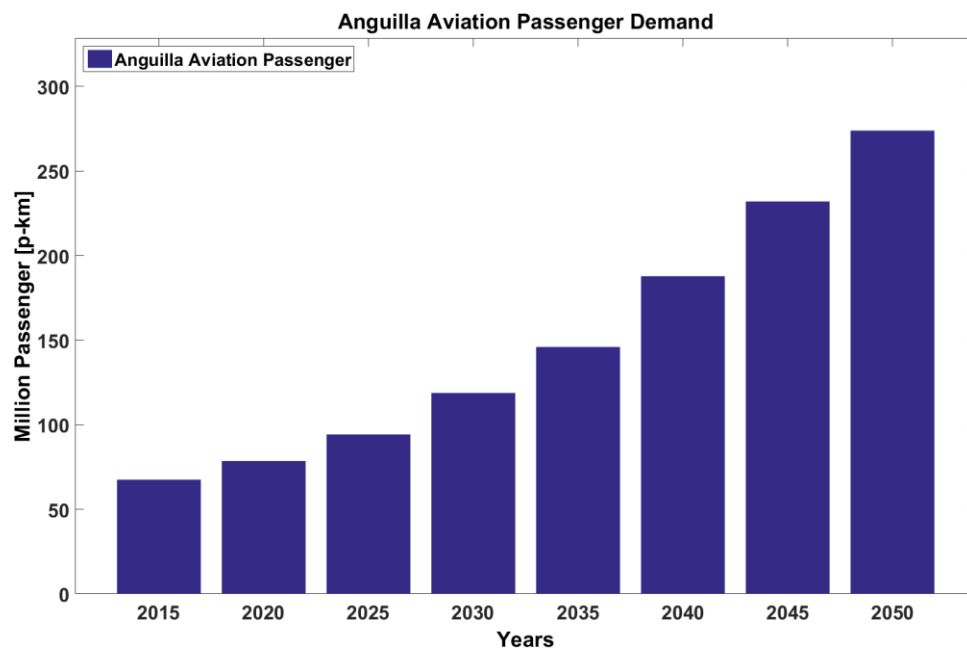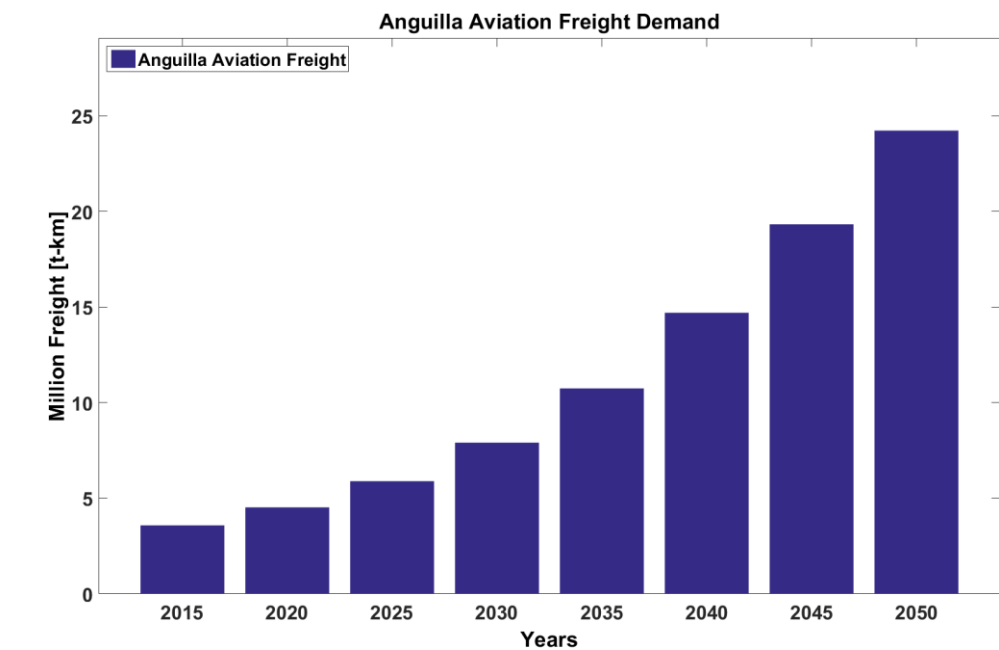

Antigua and Barbuda Road Passenger Demand

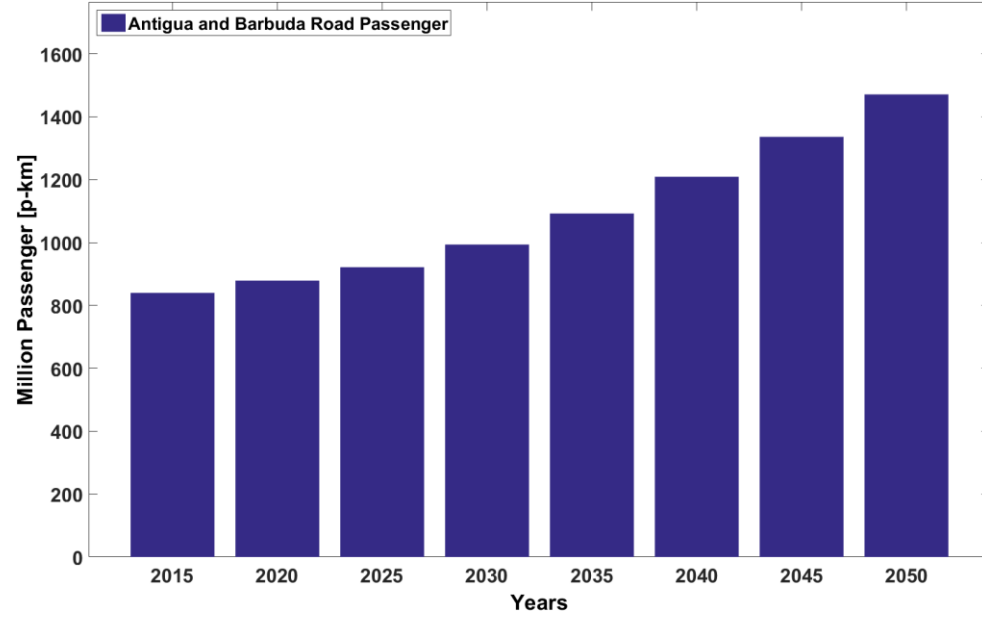

Antigua and Barbuda Road Freight Demand

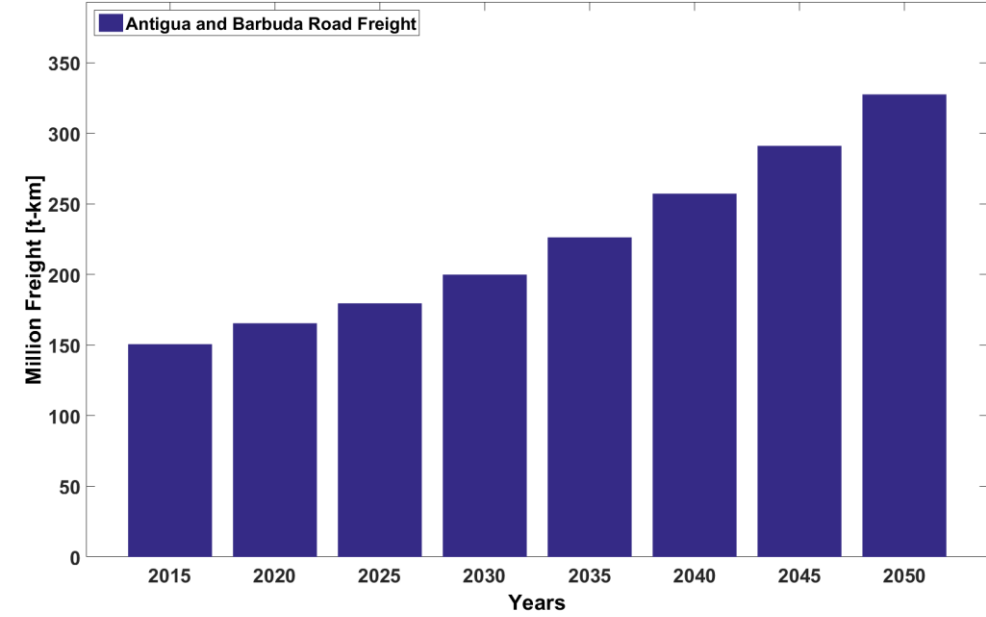

Antigua and Barbuda Rail Passenger Demand

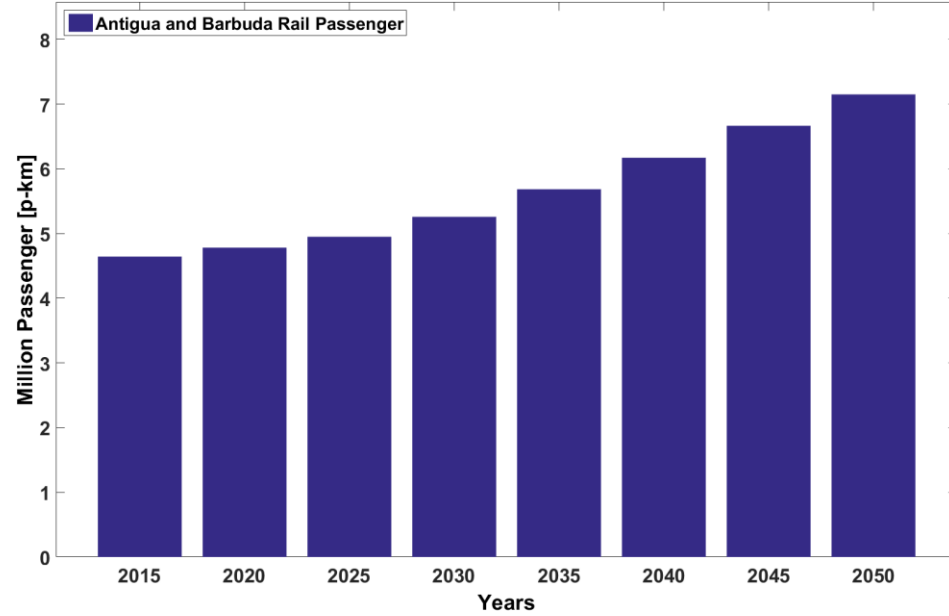

Antigua and Barbuda Rail Freight Demand

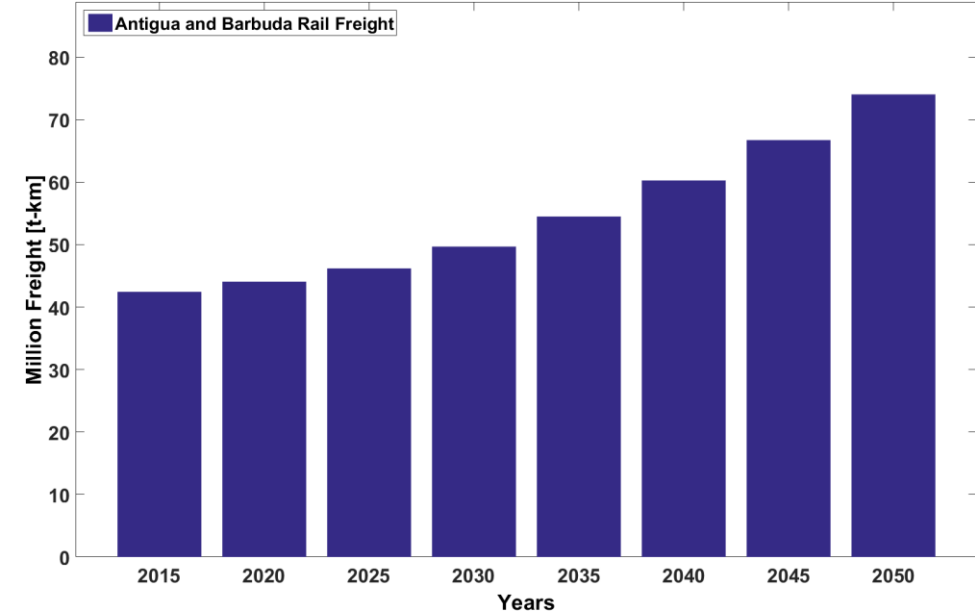



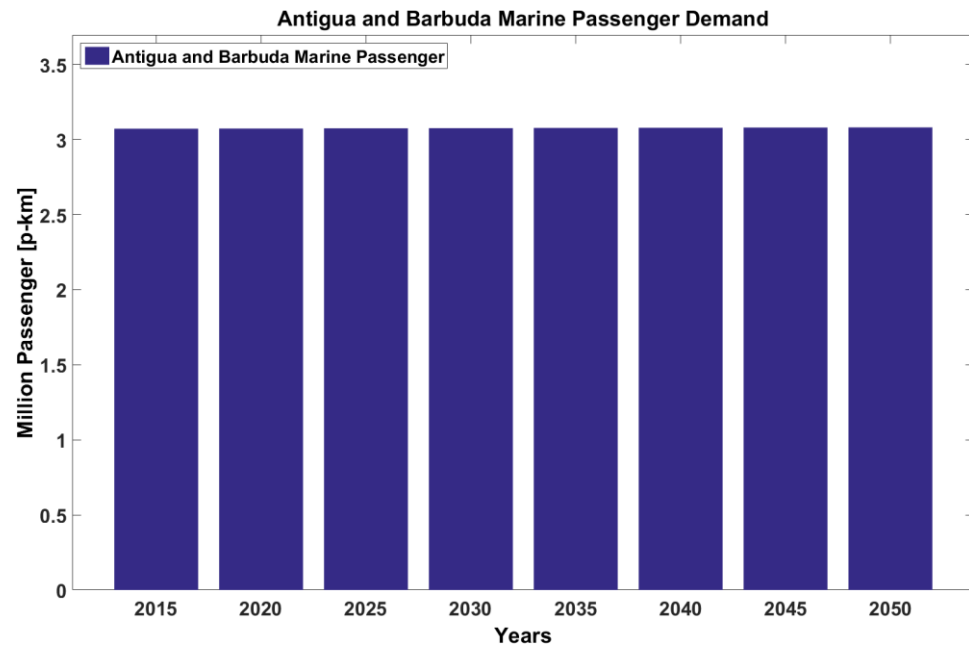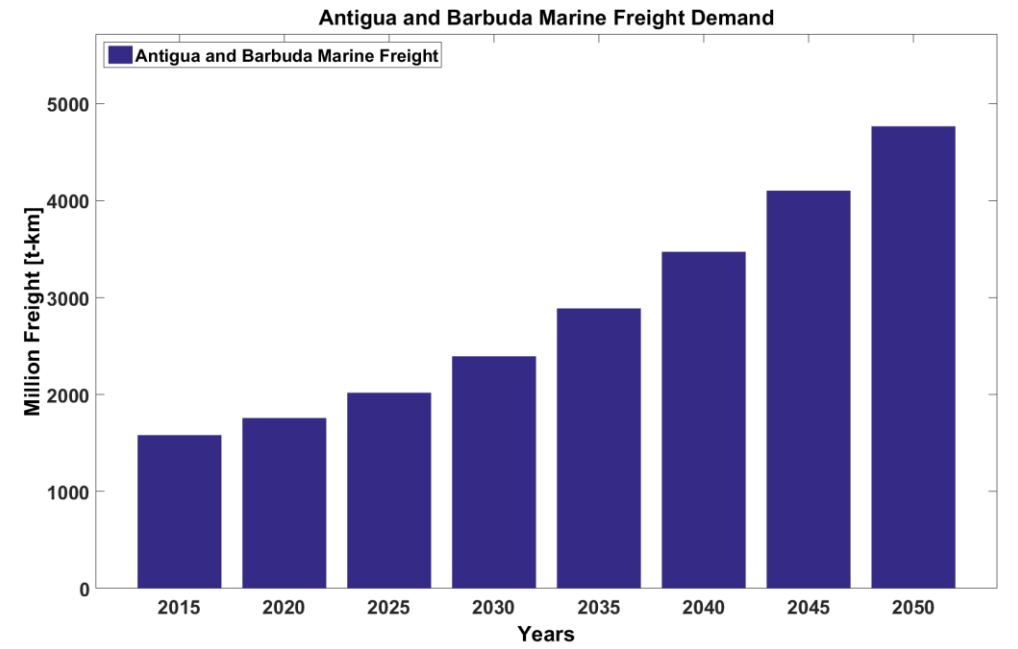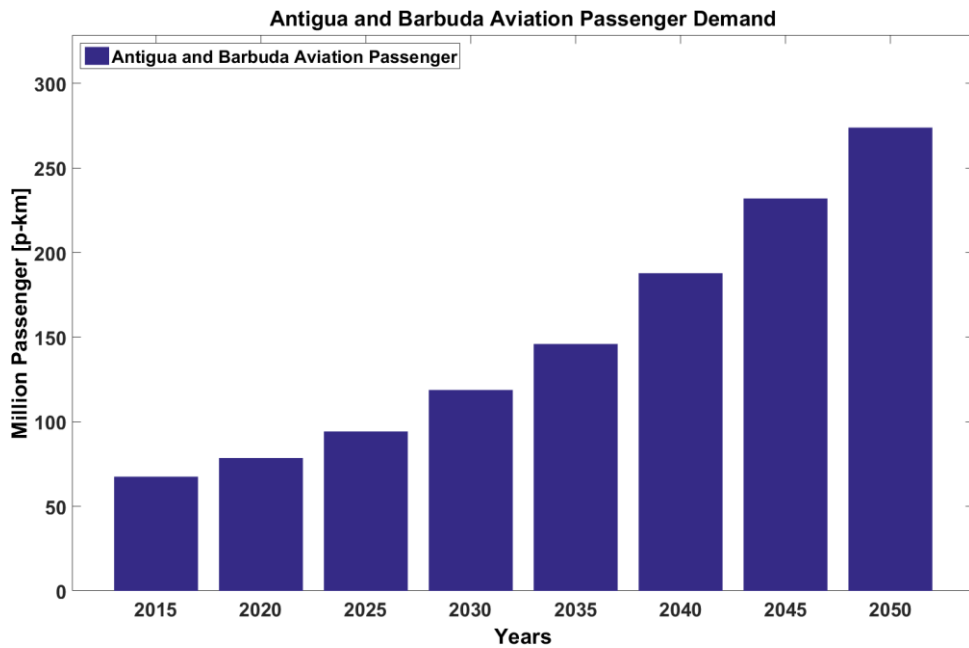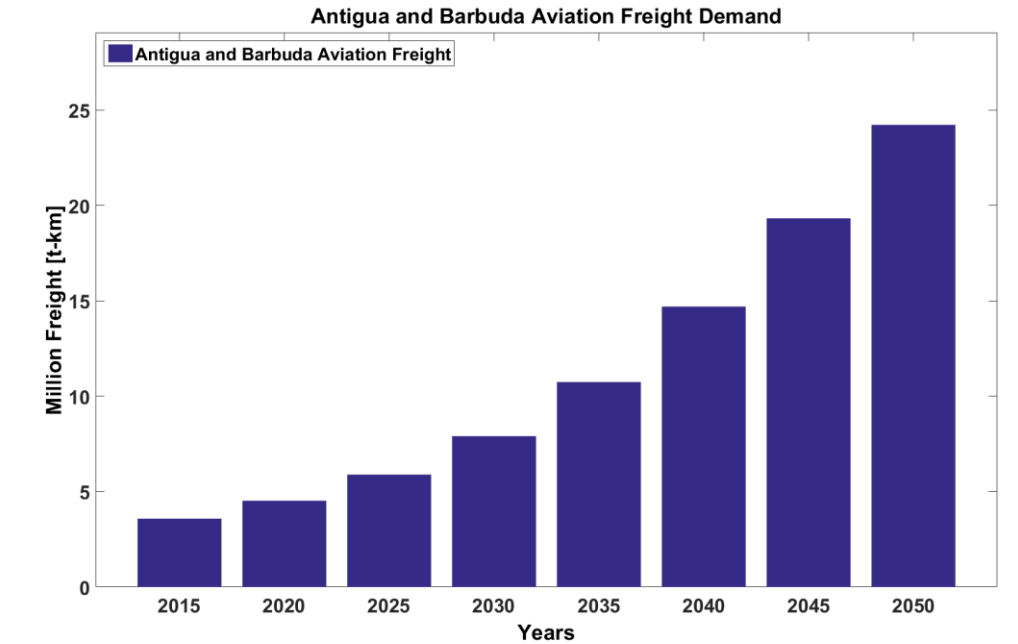

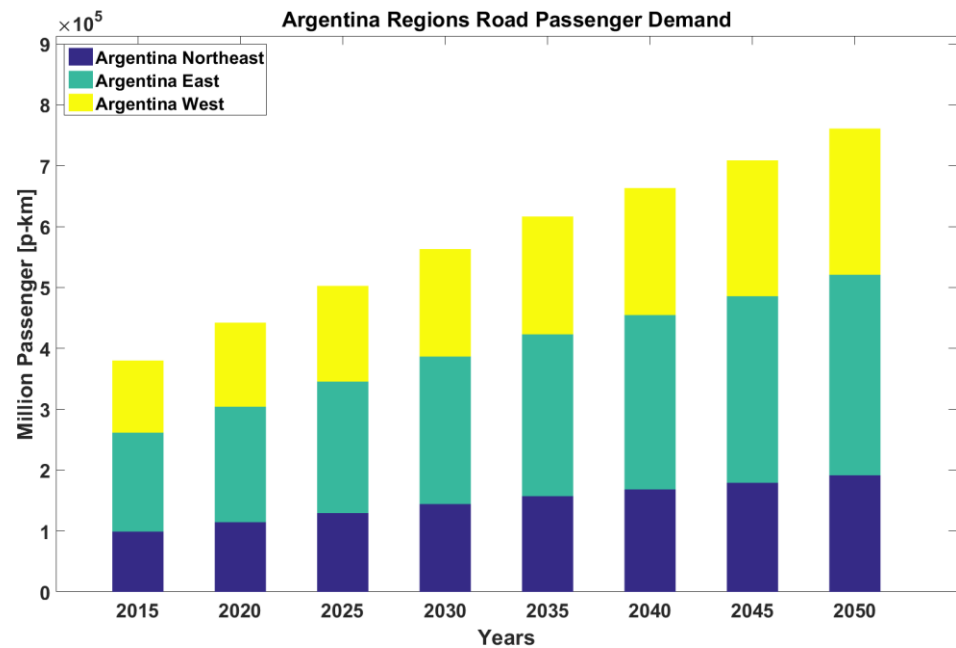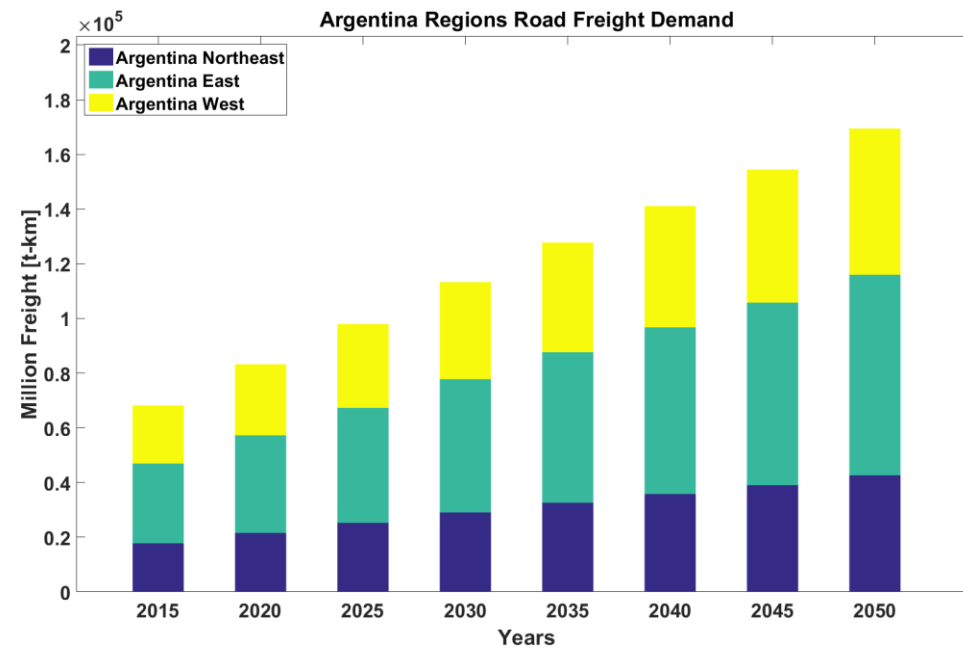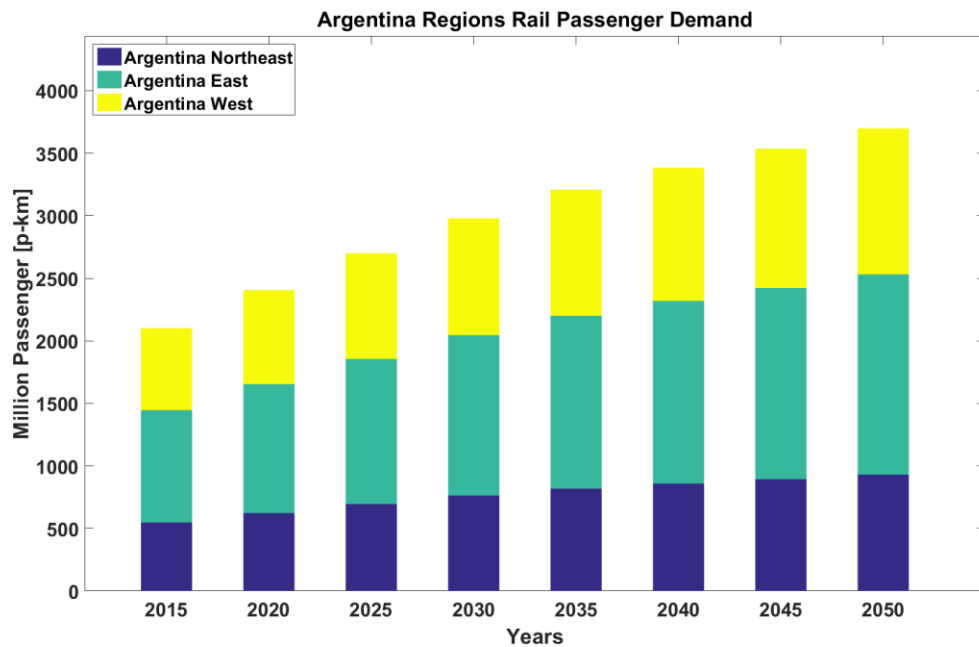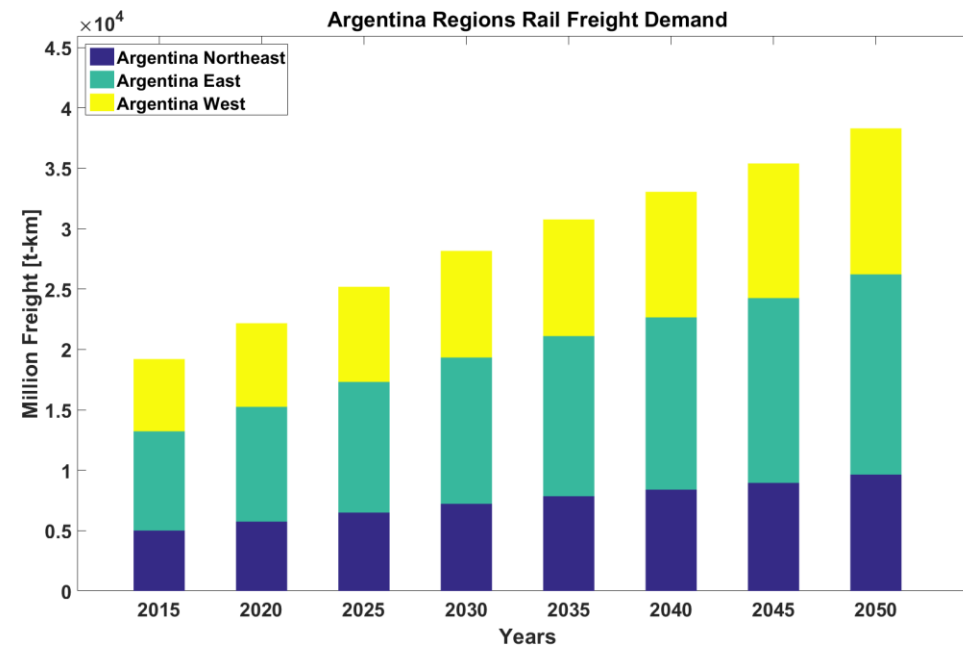

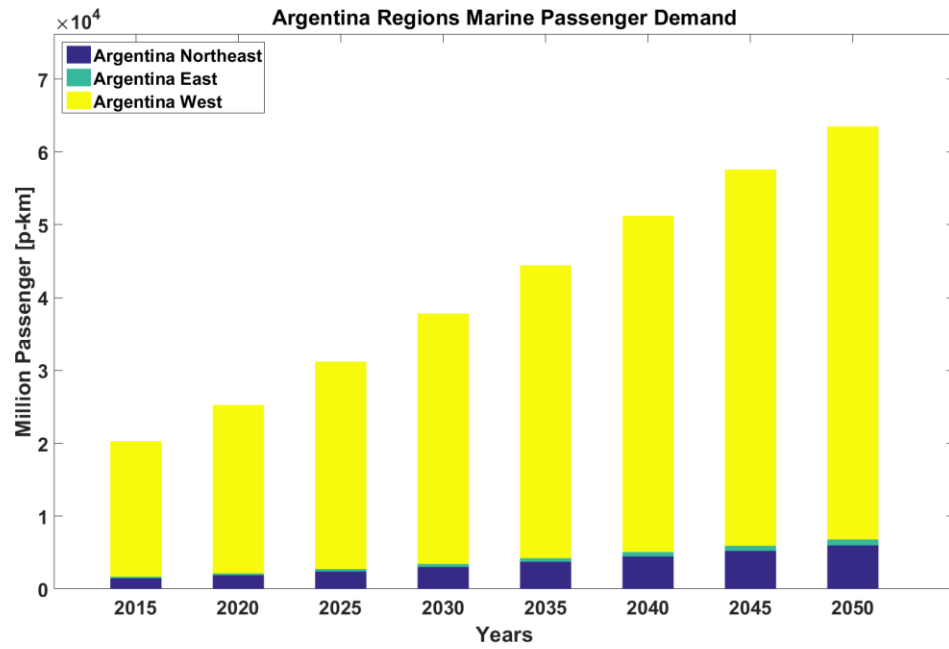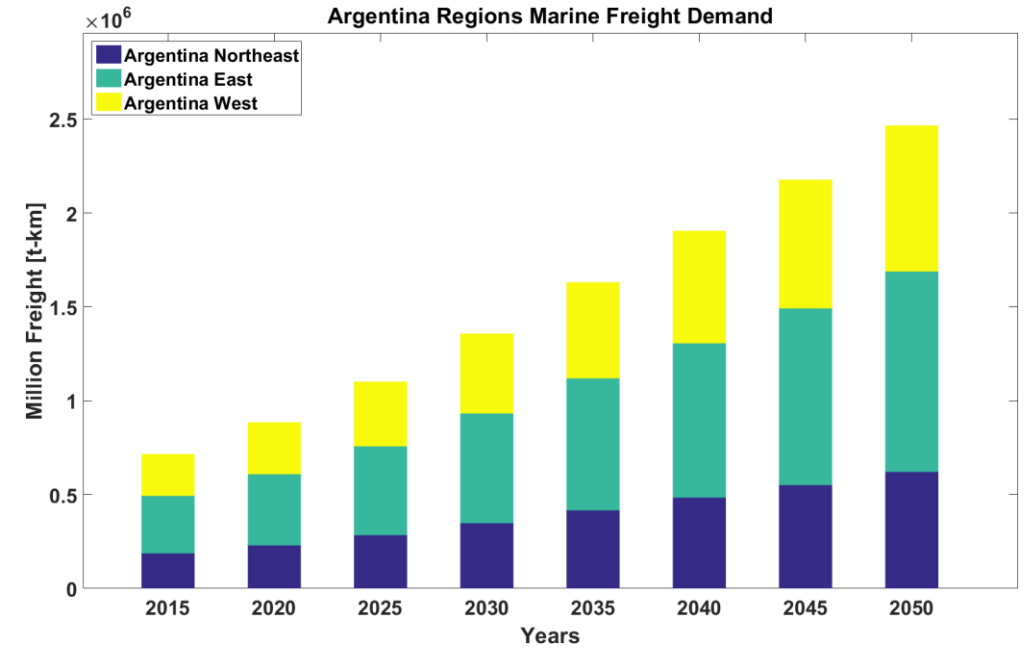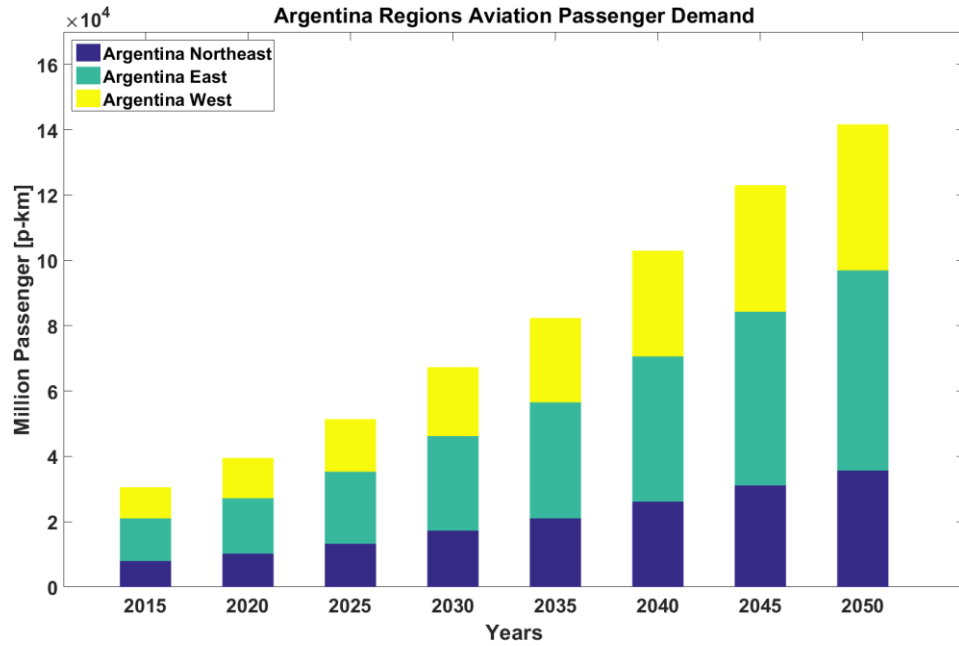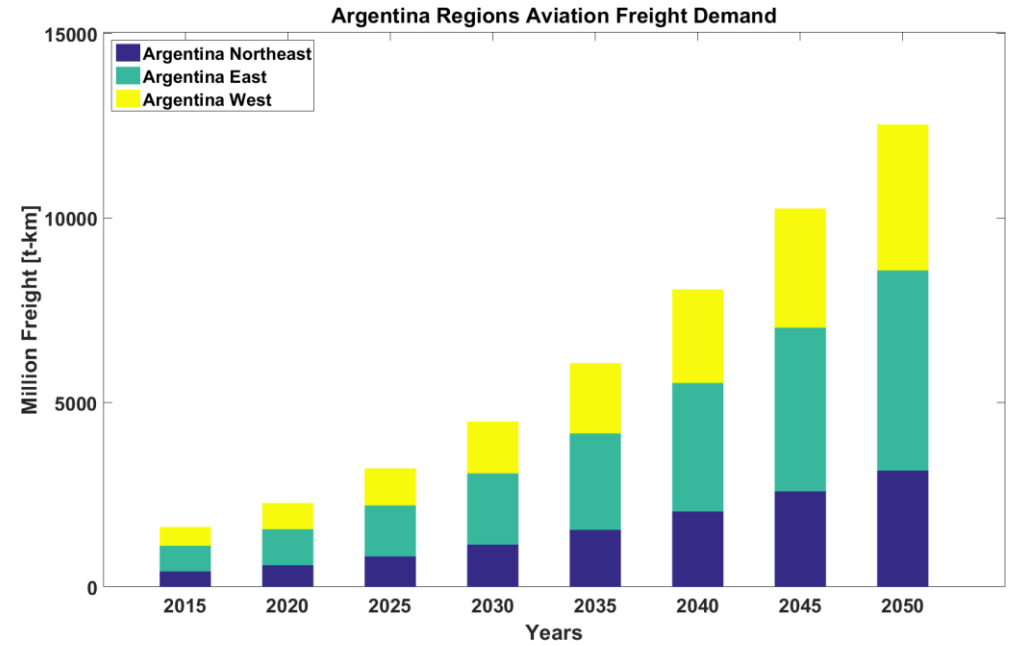

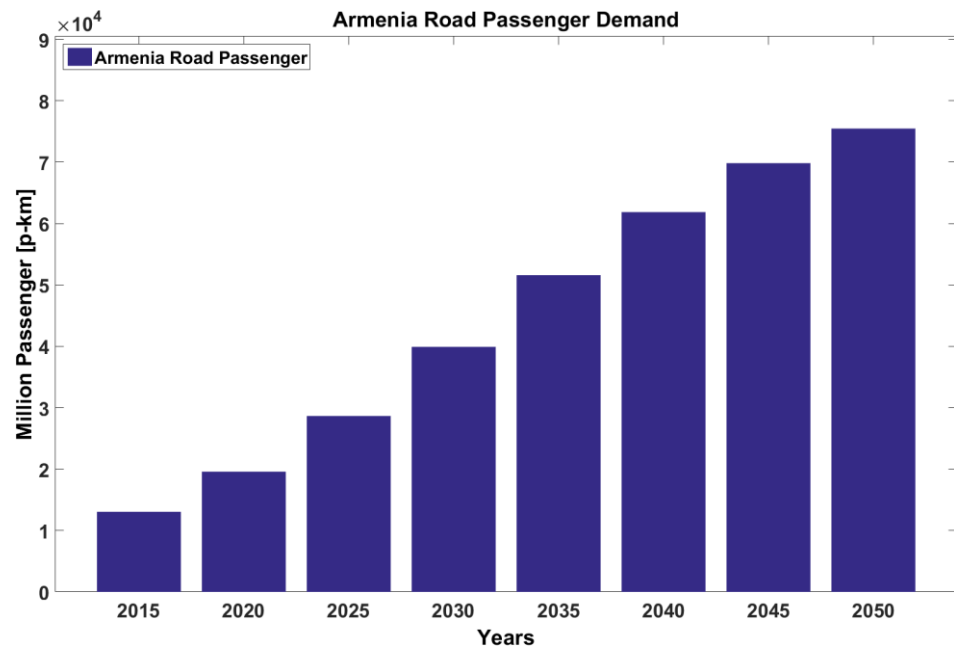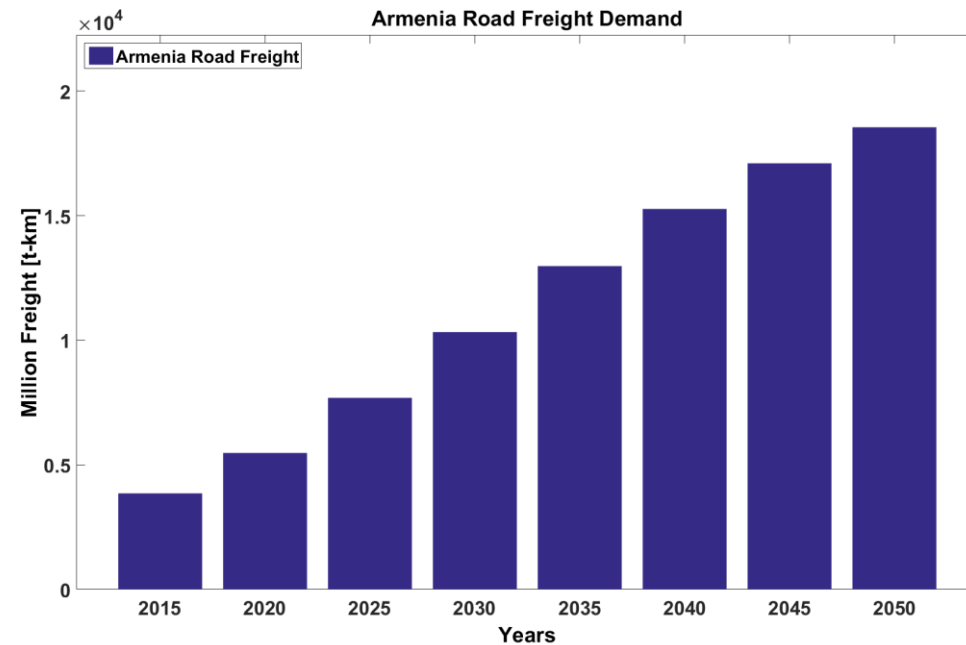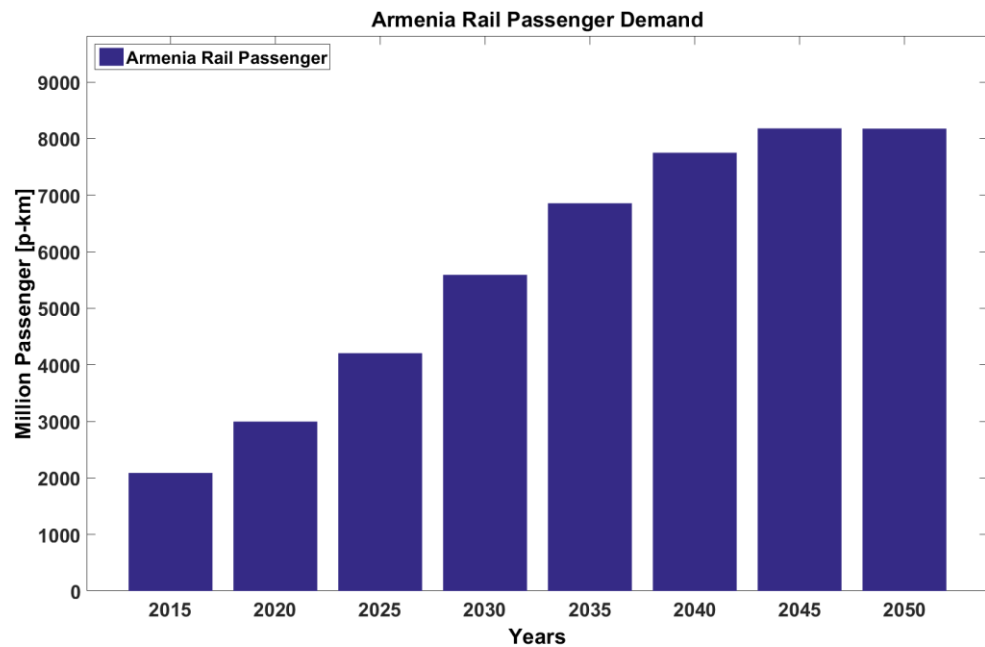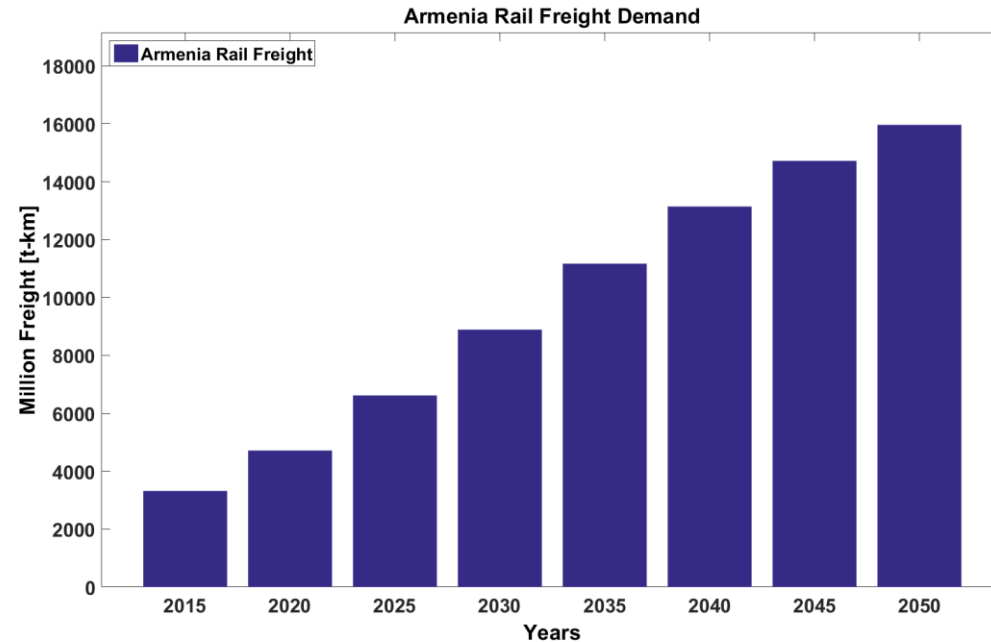

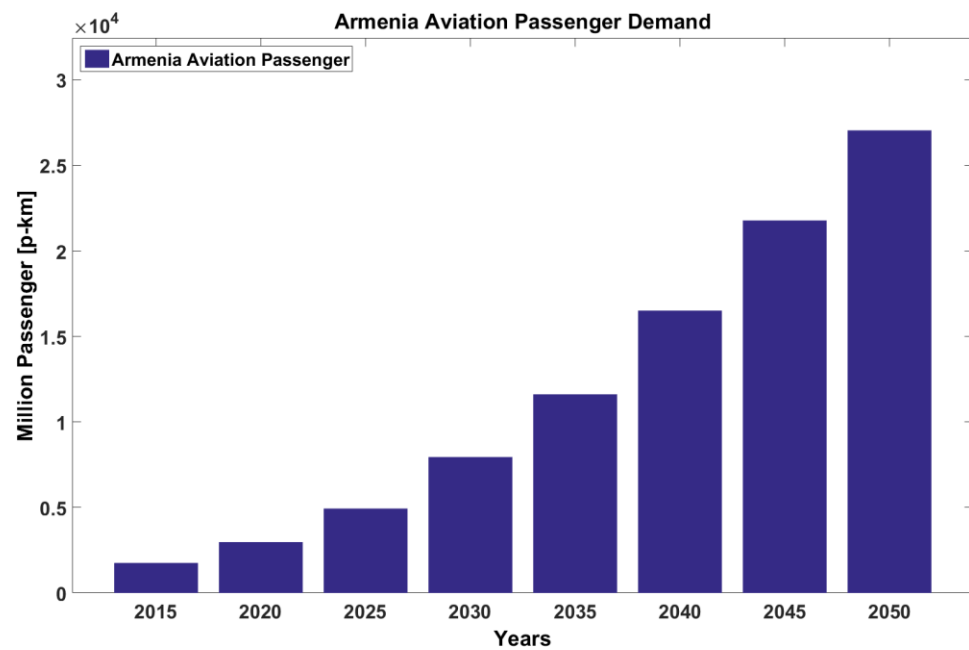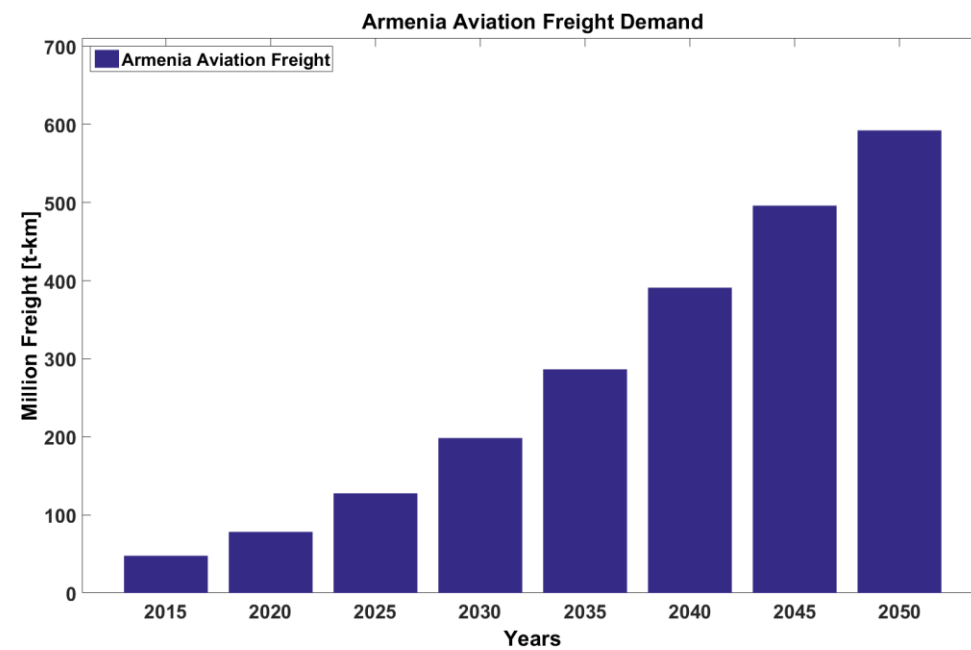

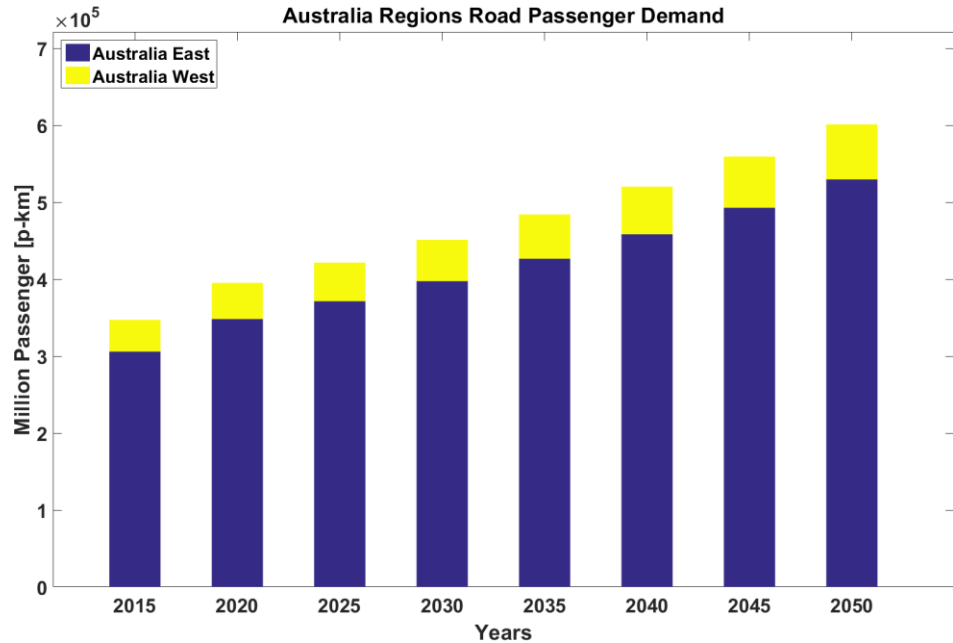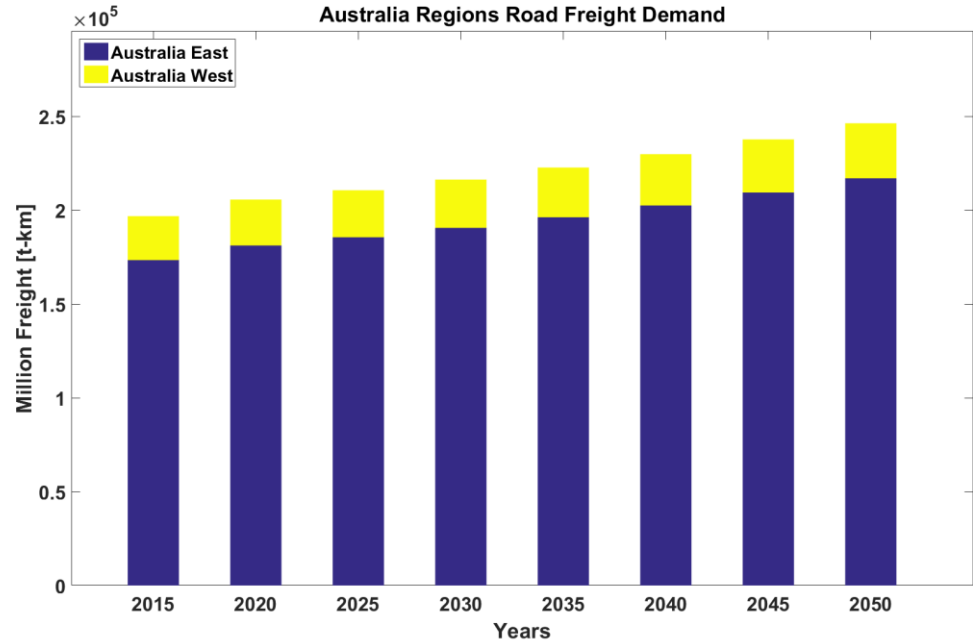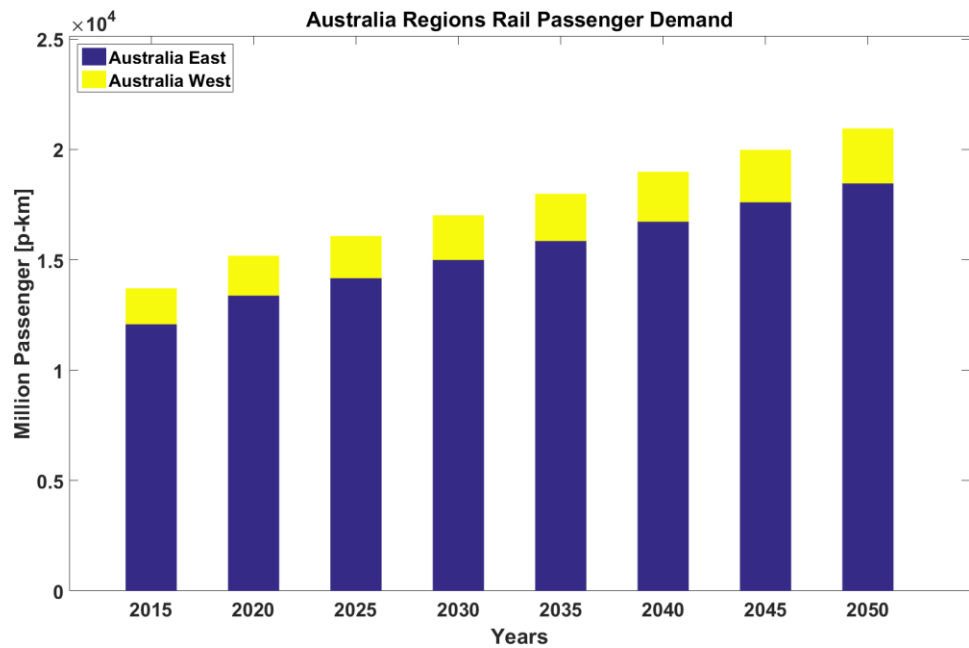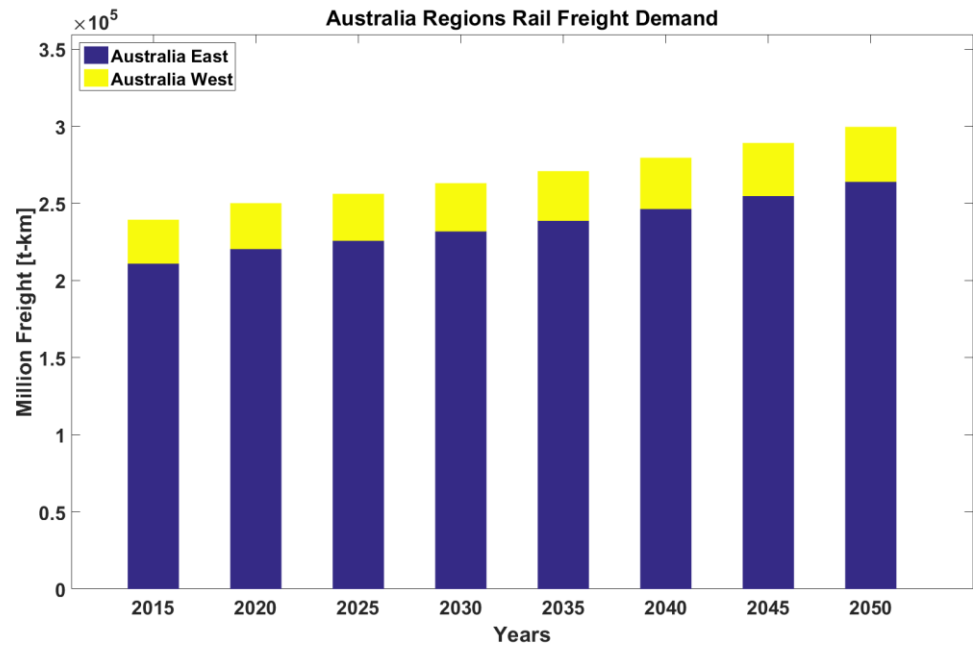

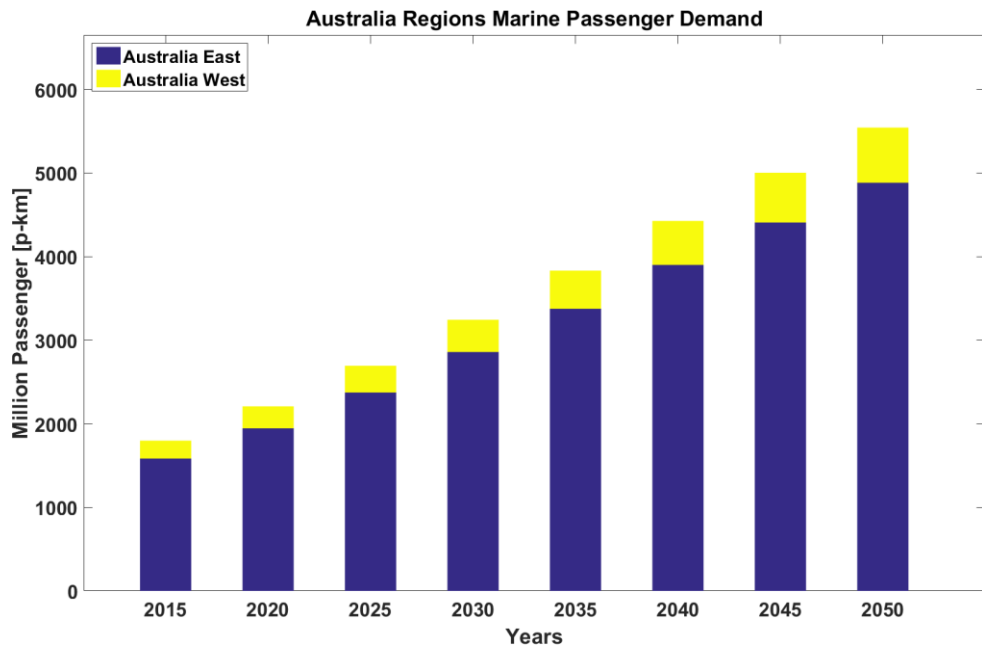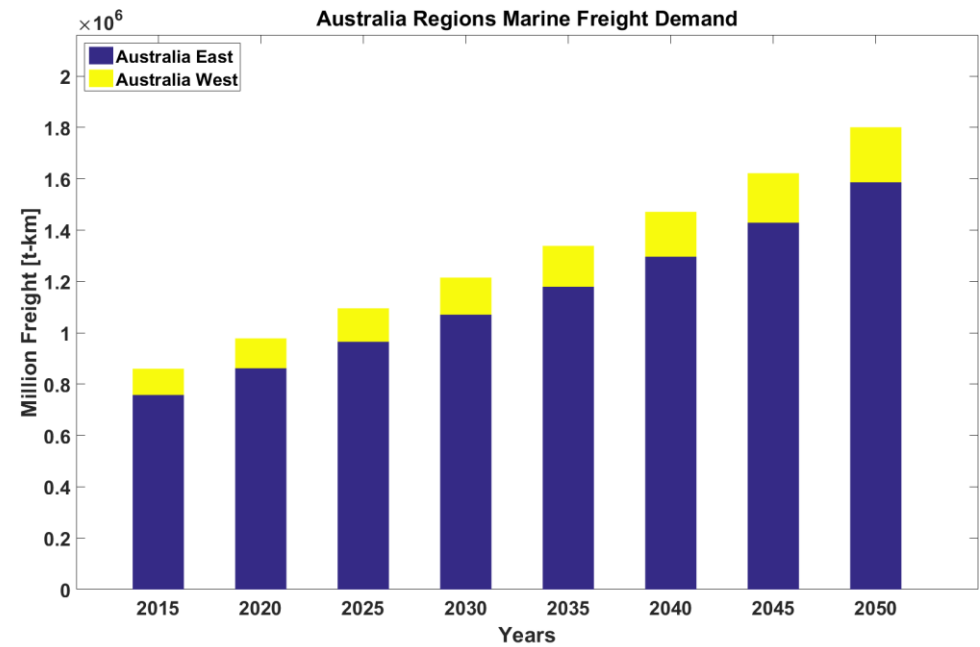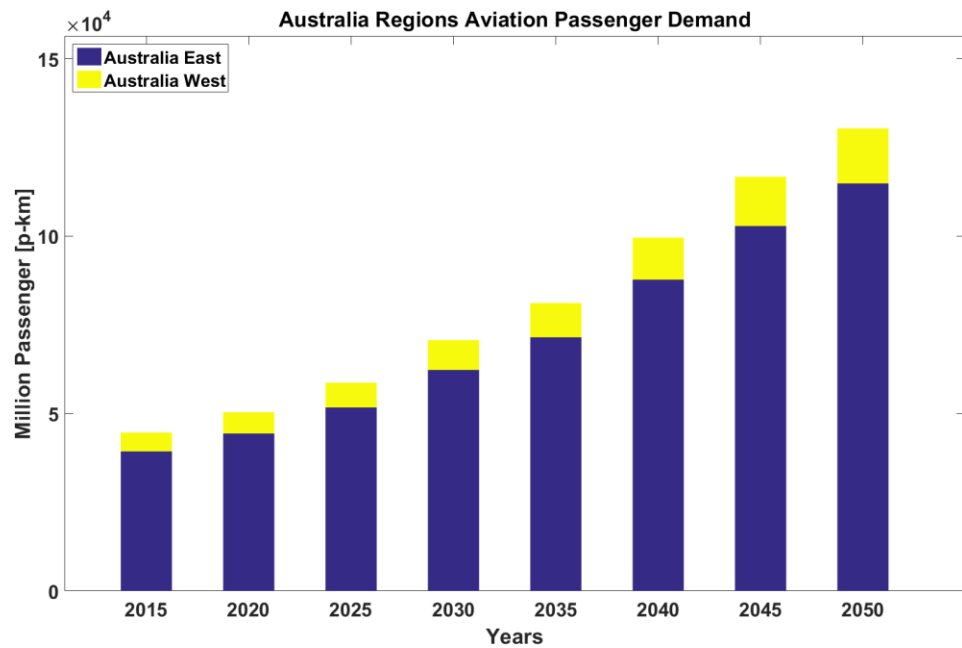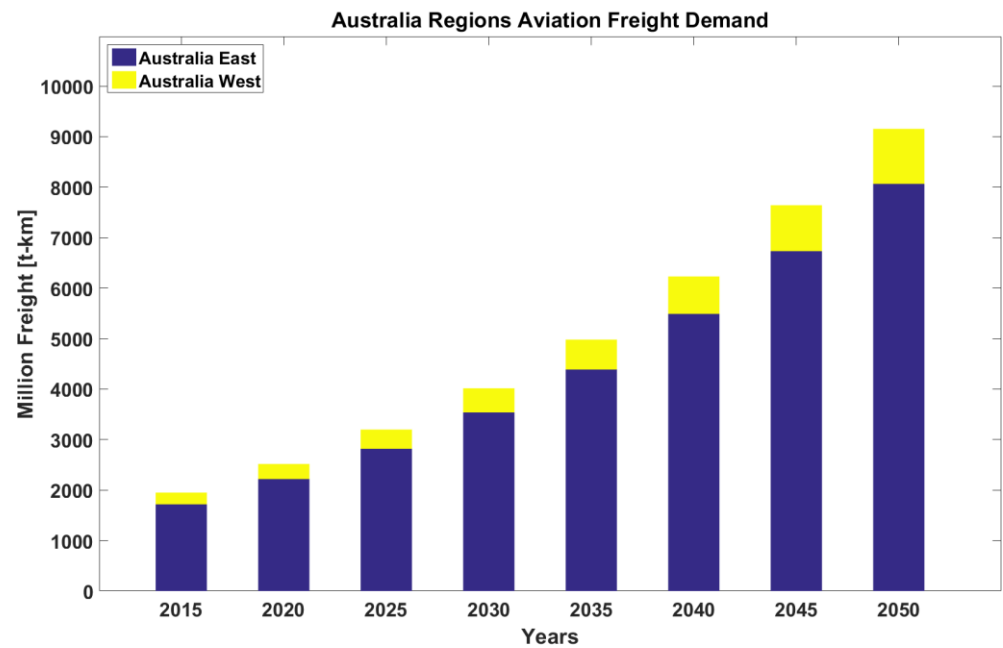

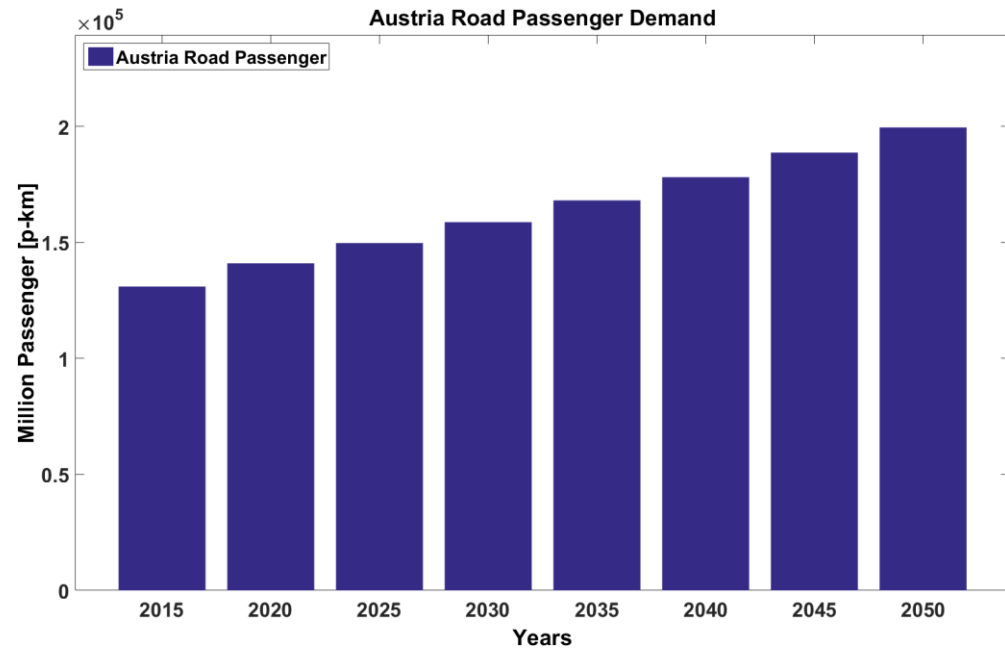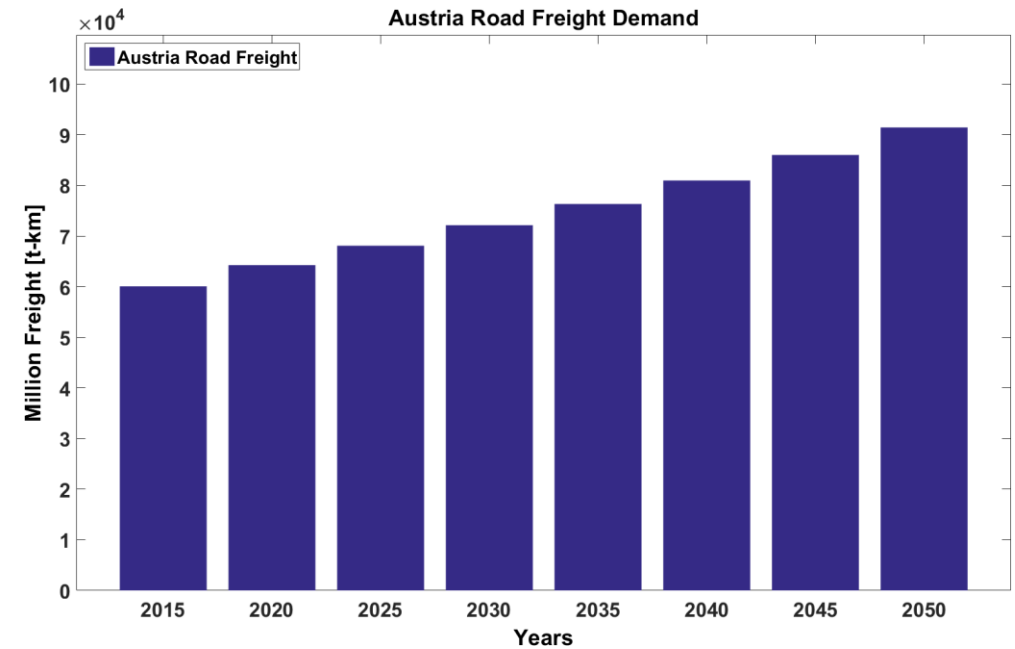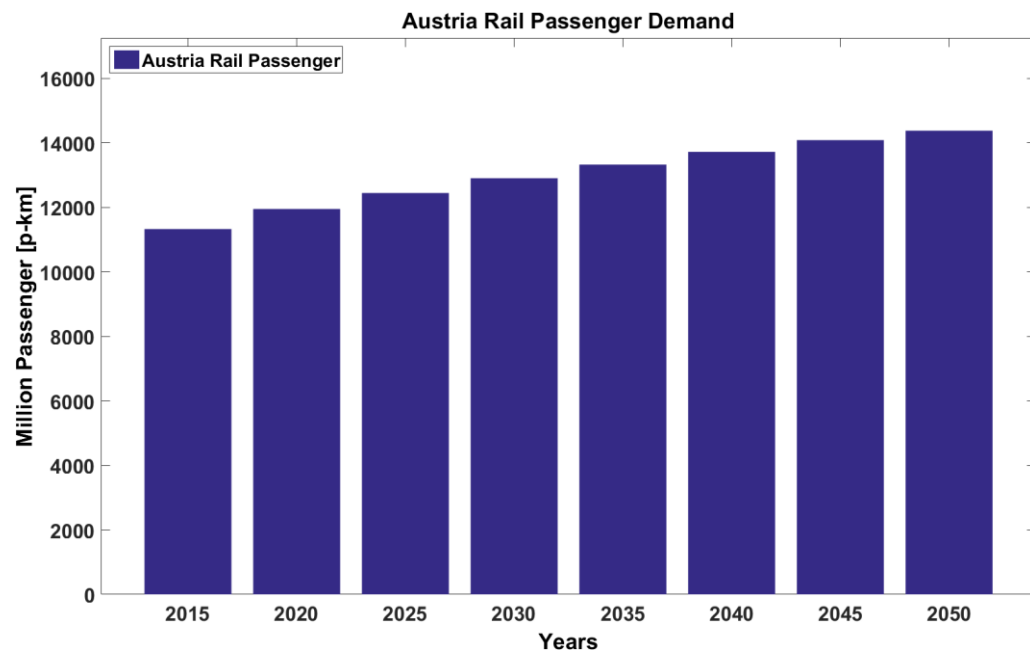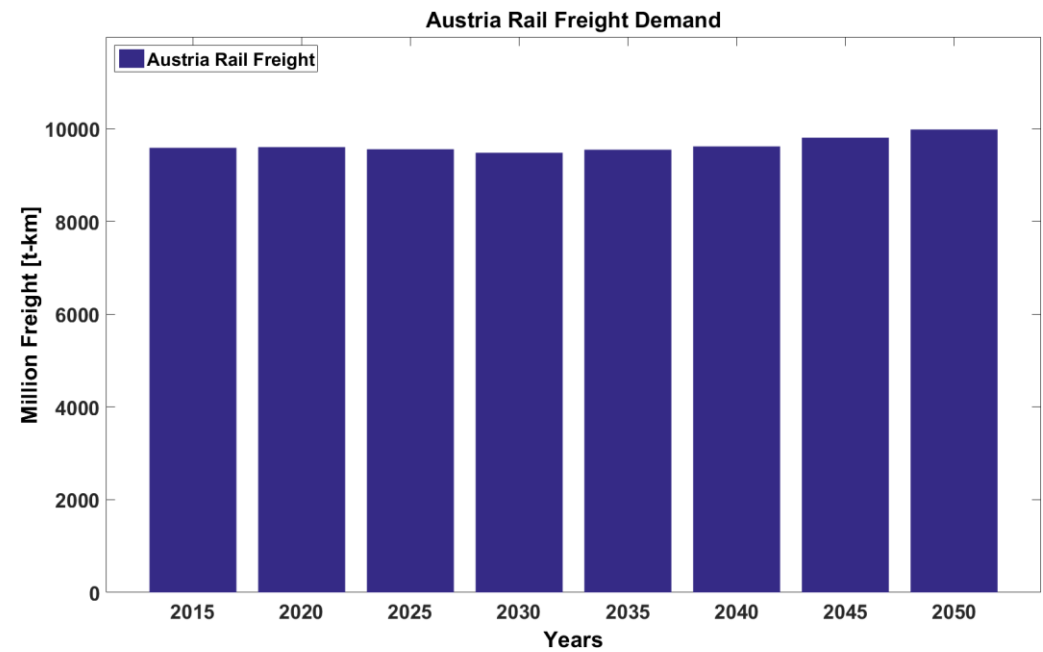



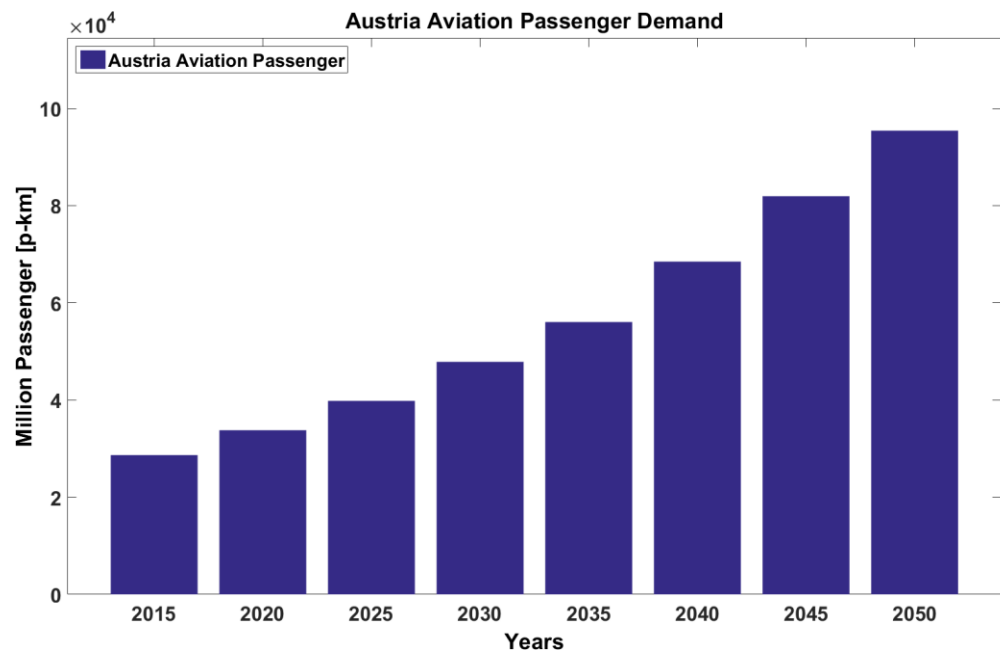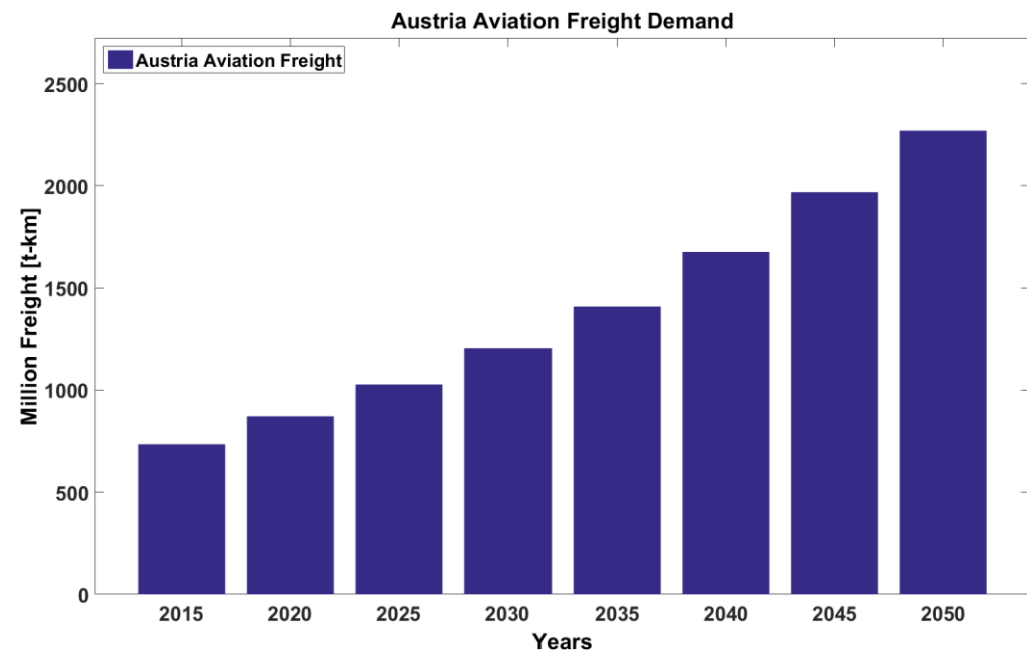

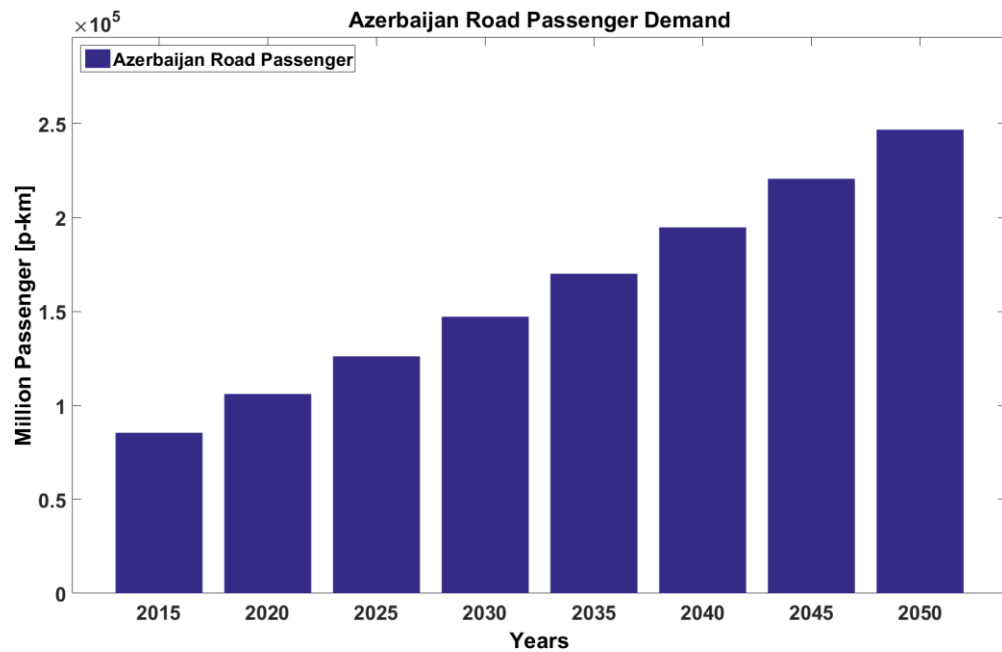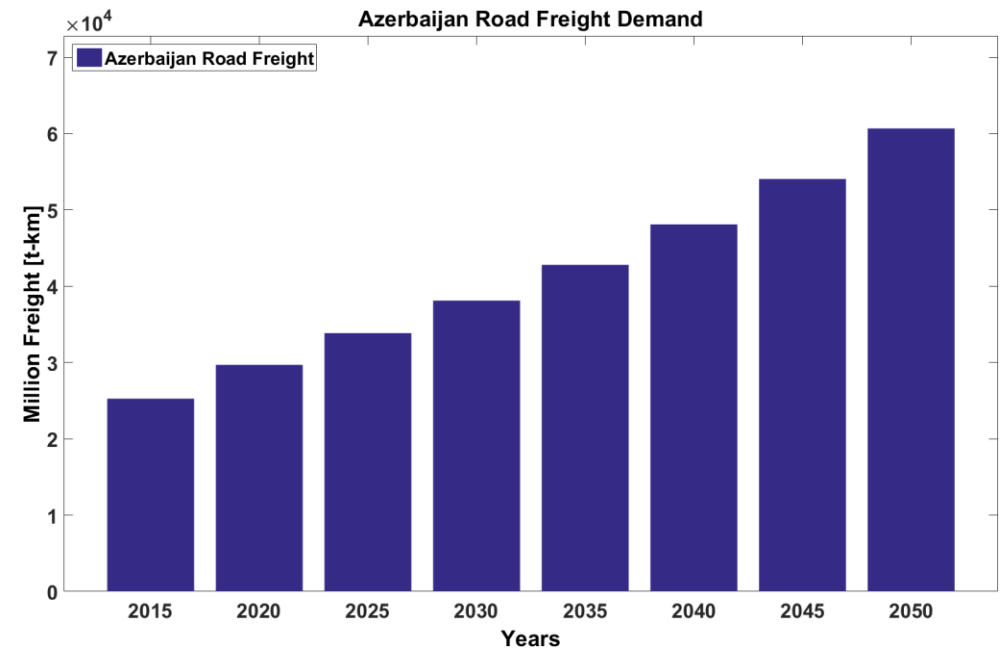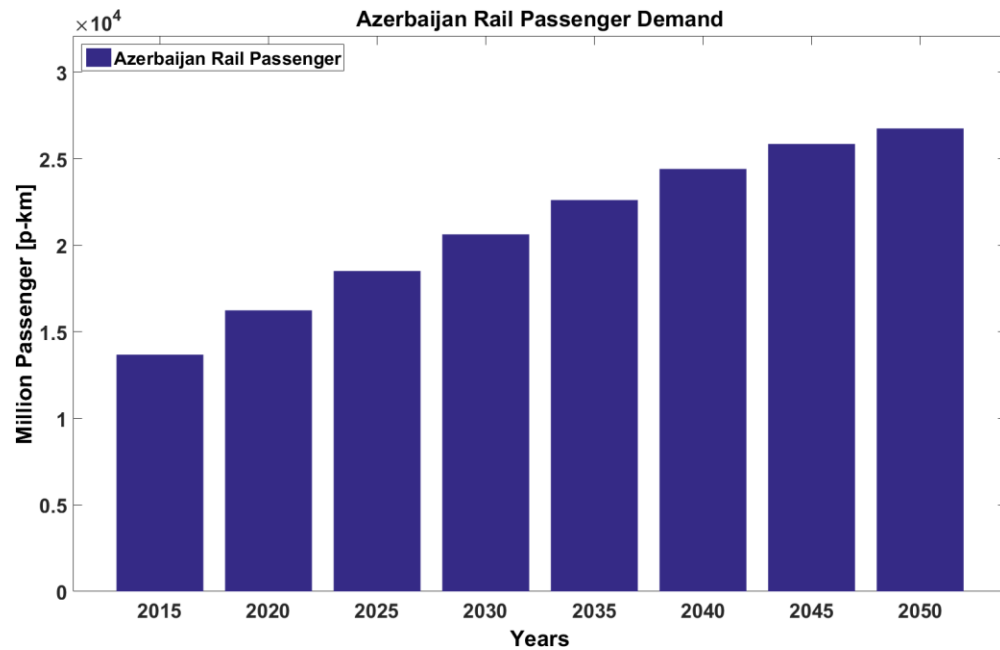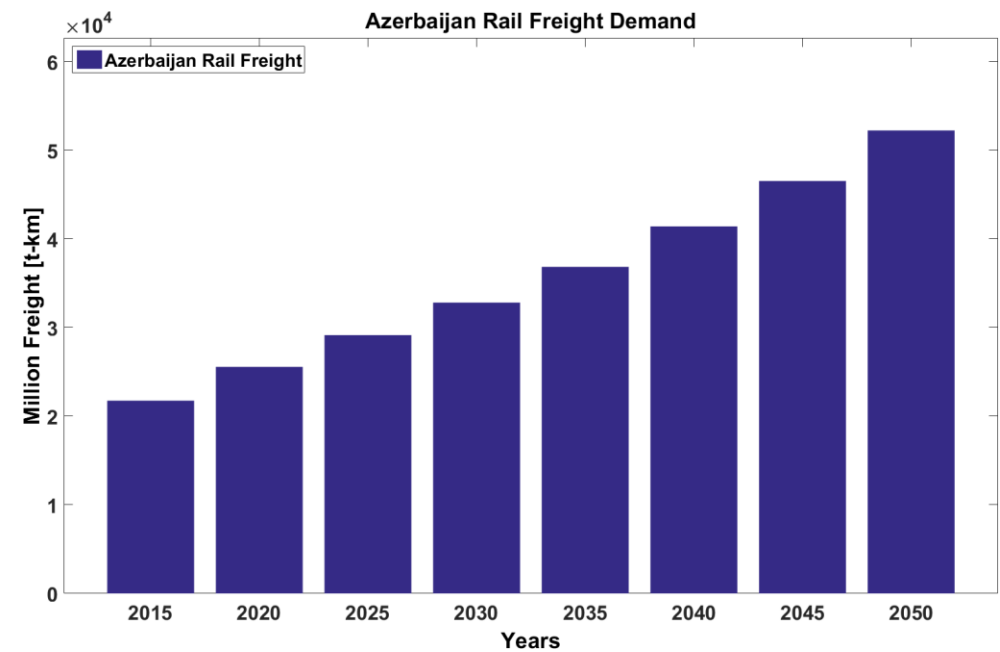

### Azerbaijan Marine Passenger Demand

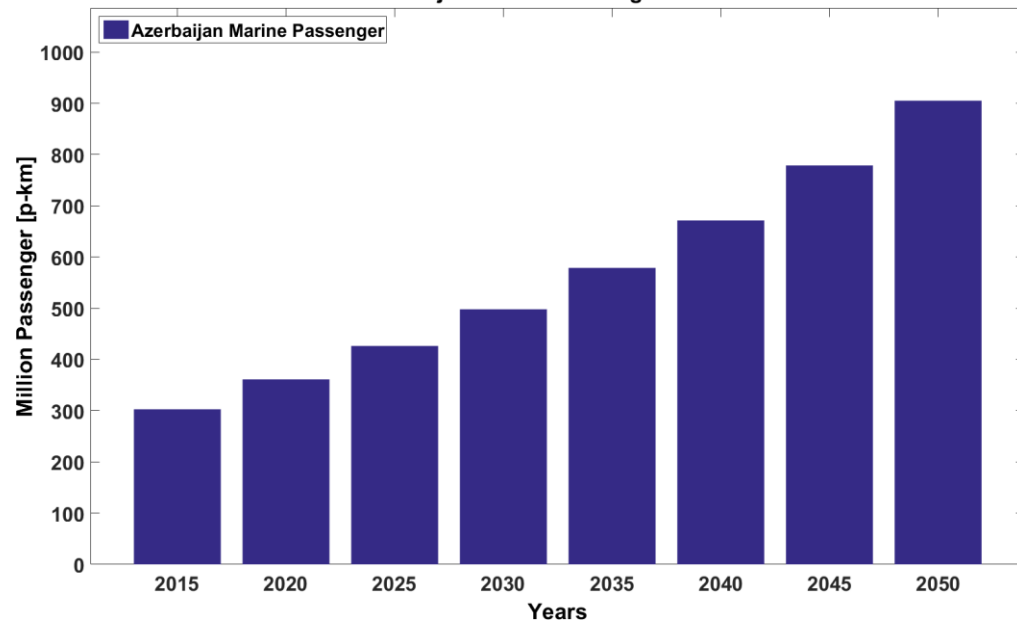

### Azerbaijan Marine Freight Demand

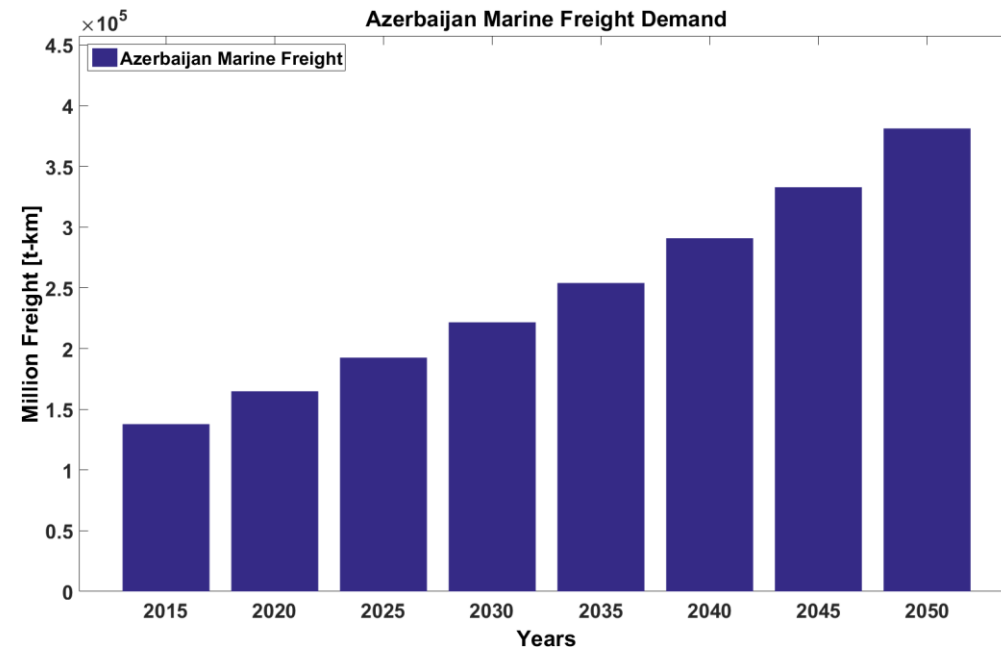

### Azerbaijan Aviation Passenger Demand

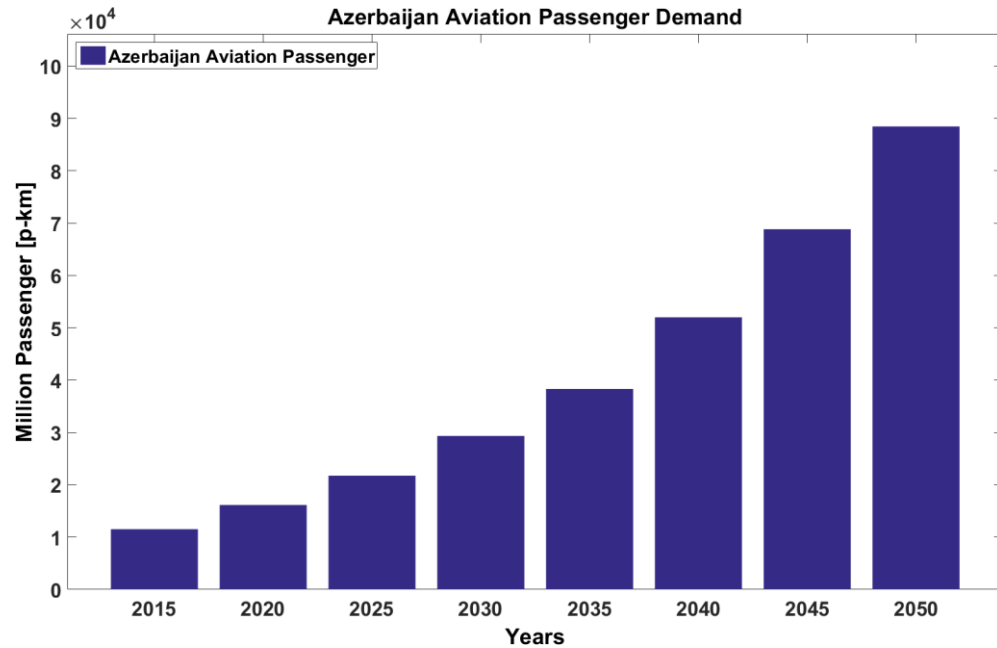

### Azerbaijan Aviation Freight Demand

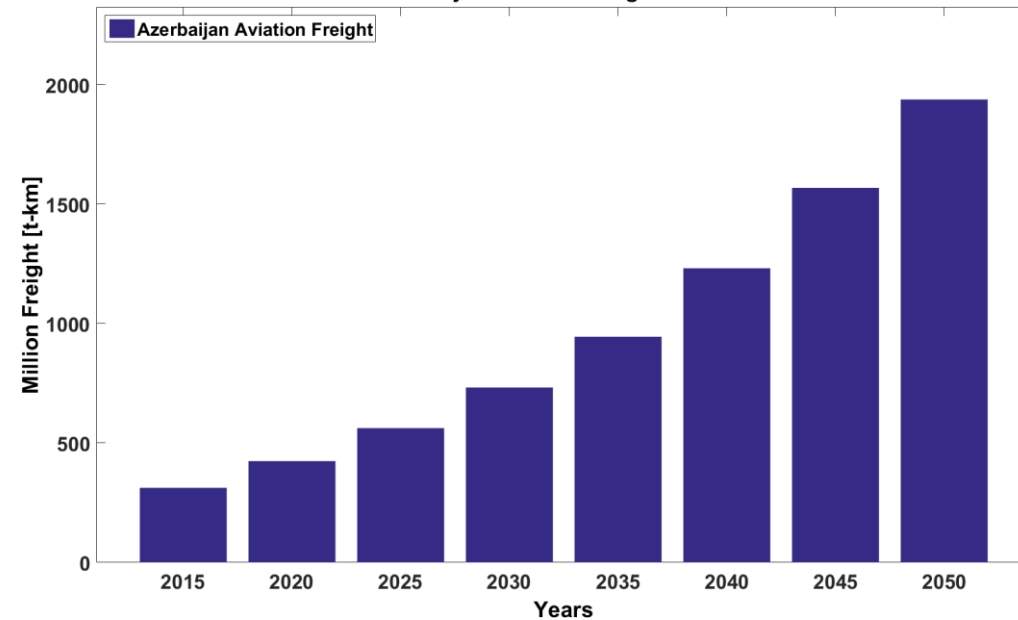

Bahamas Road Passenger Demand

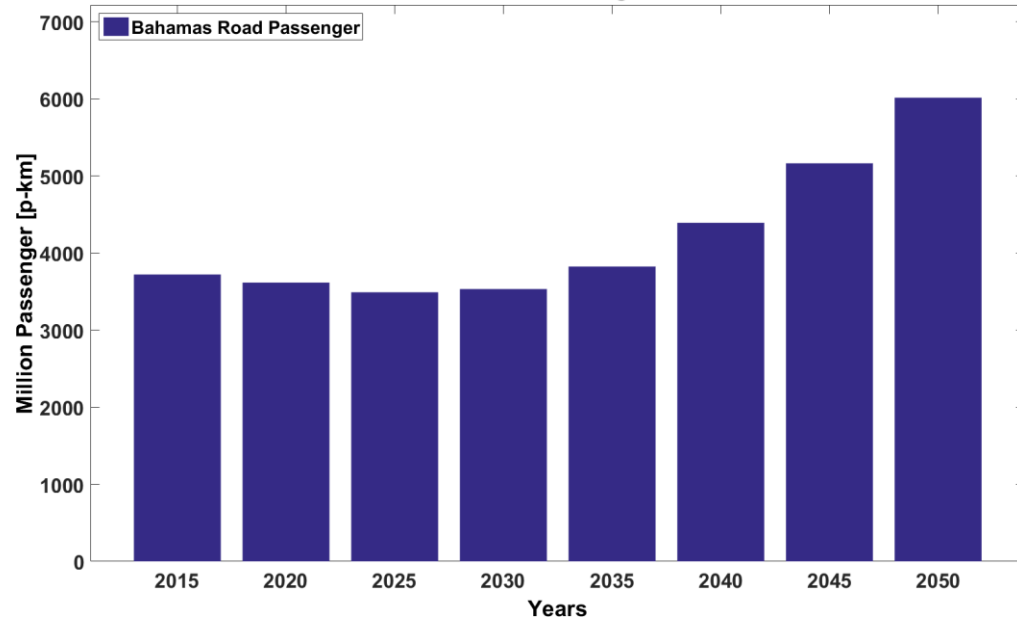

Bahamas Road Freight Demand

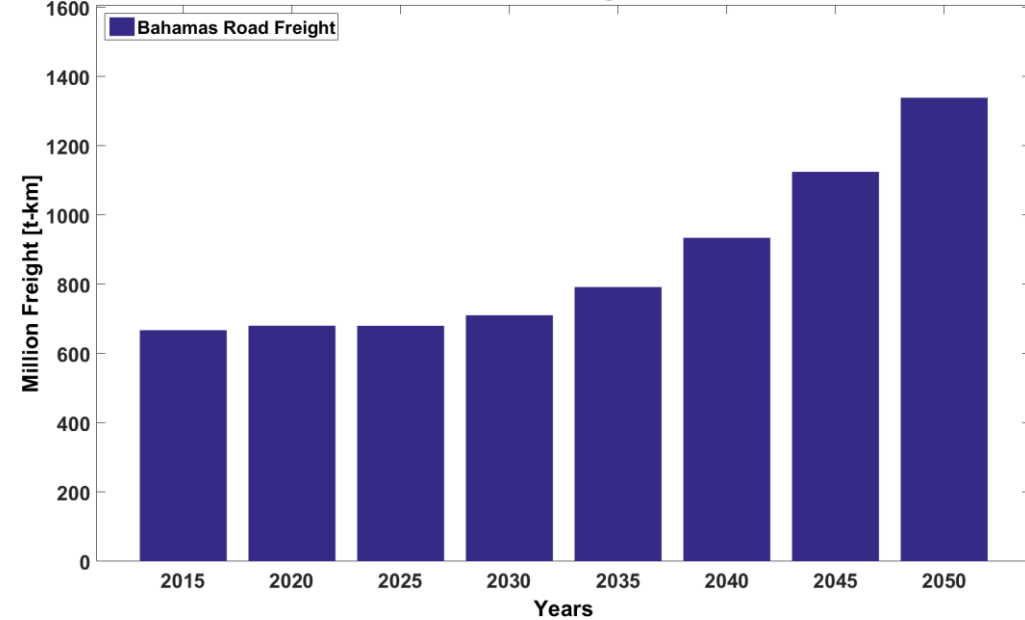

Bahamas Rail Passenger Demand

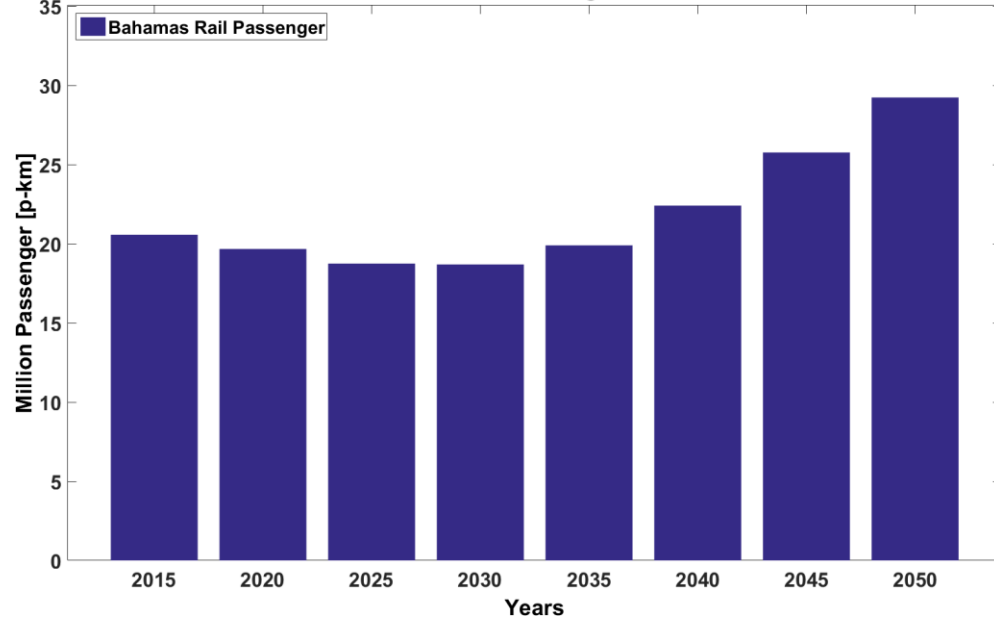

Bahamas Rail Freight Demand

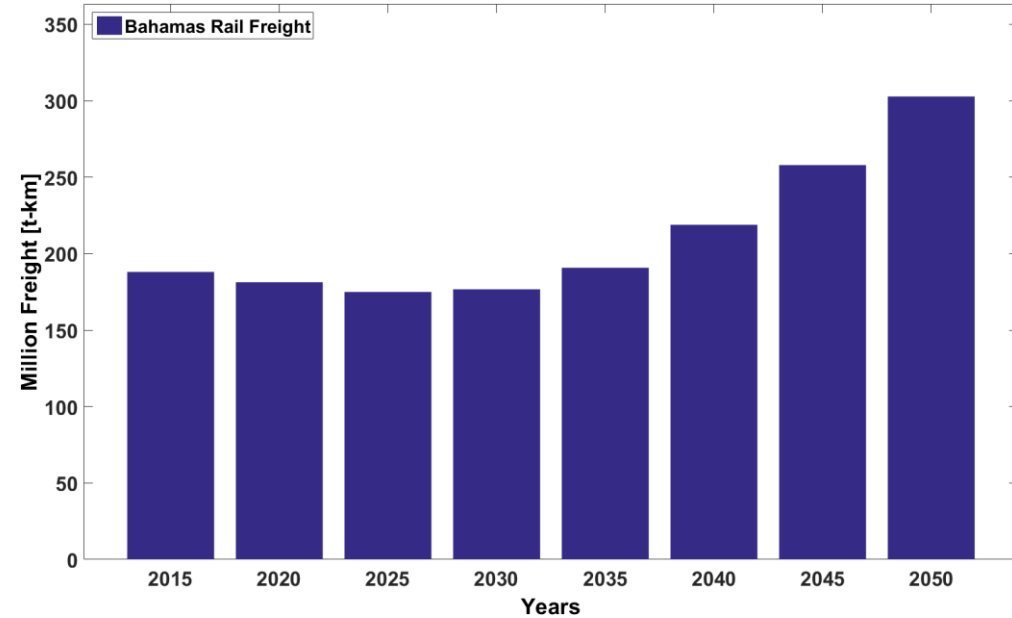

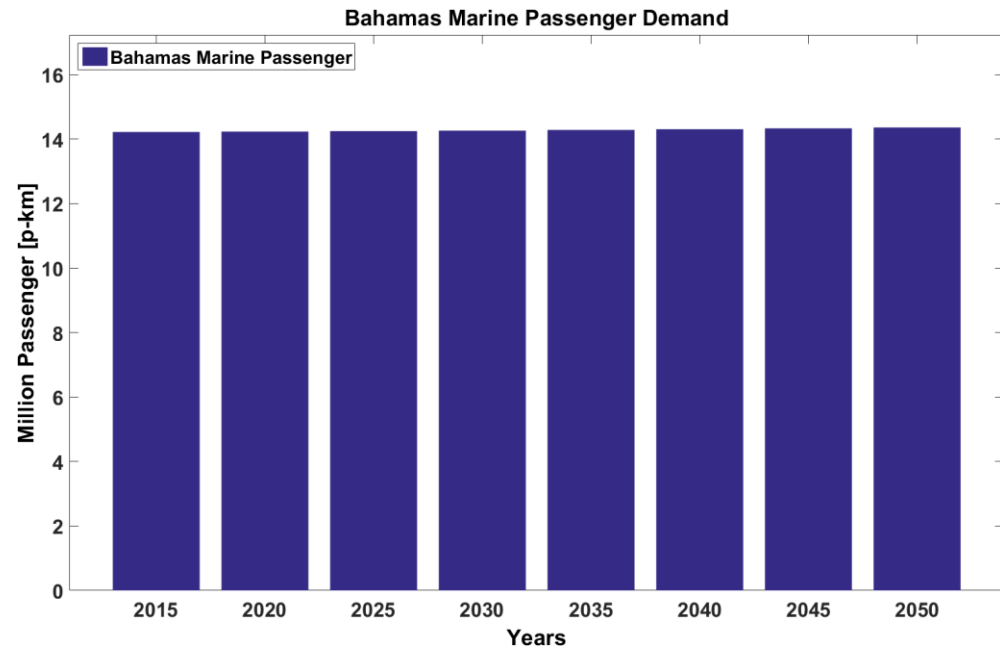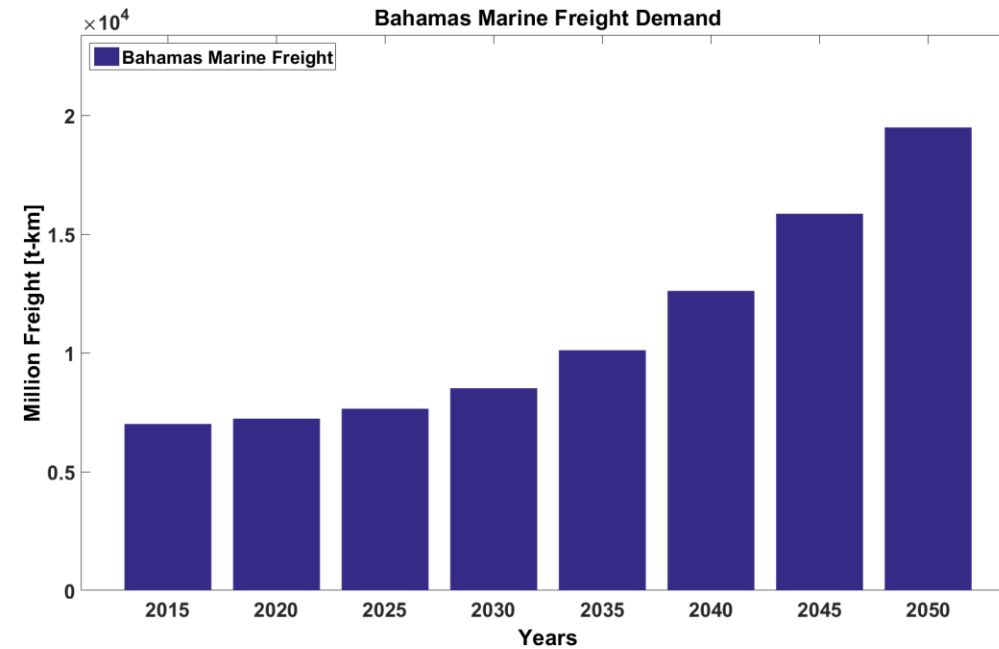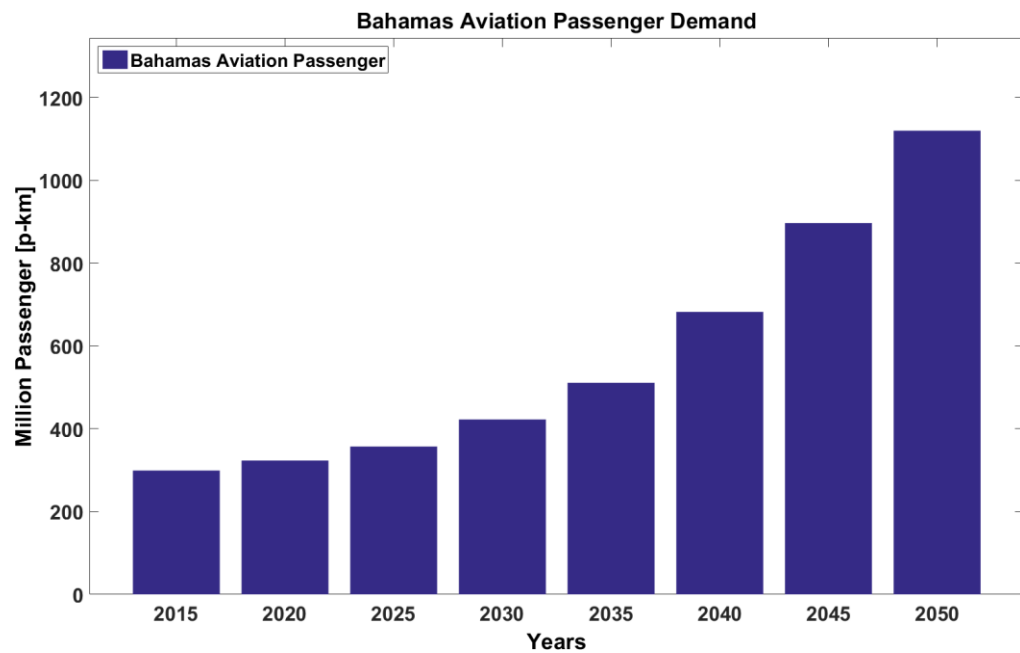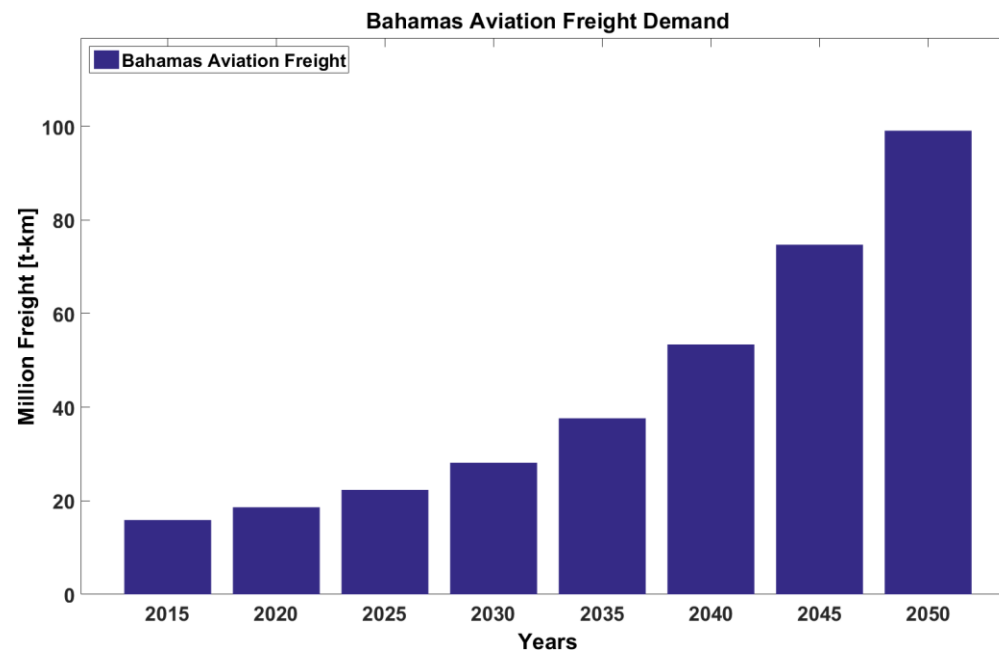

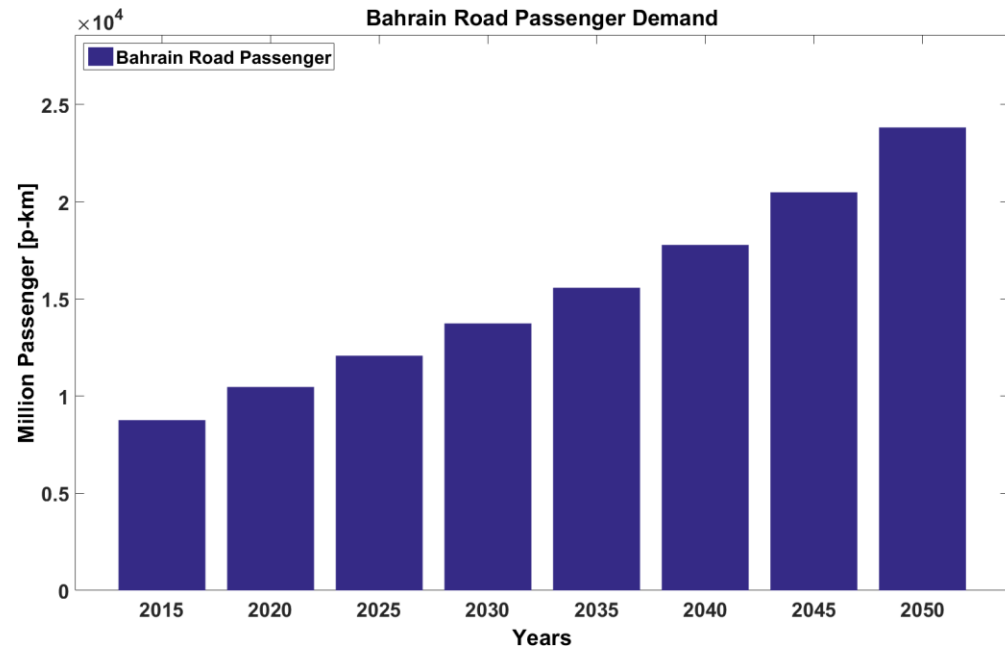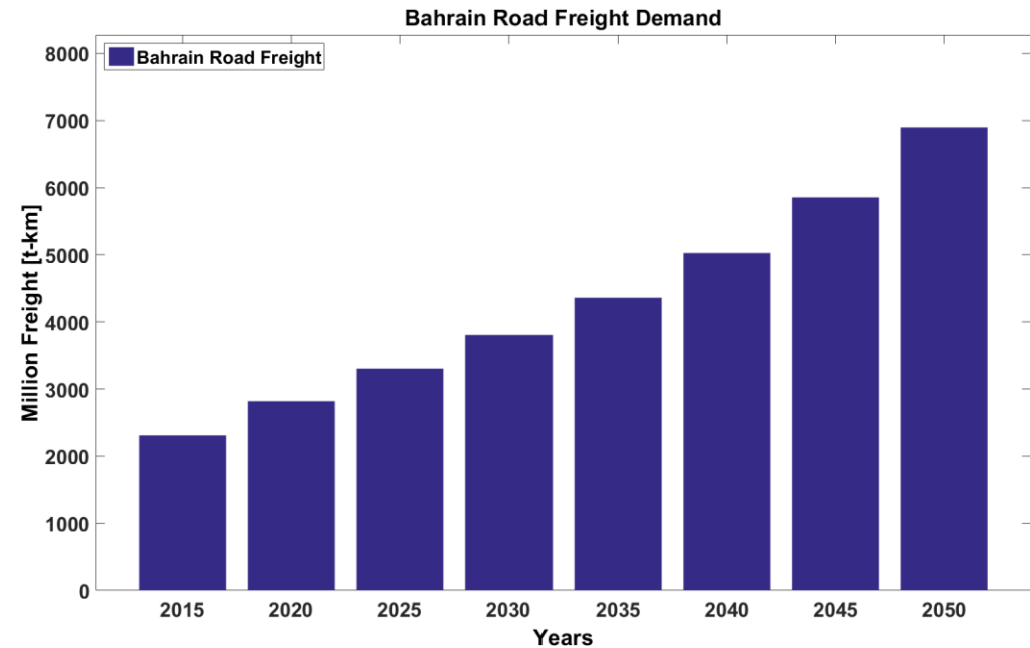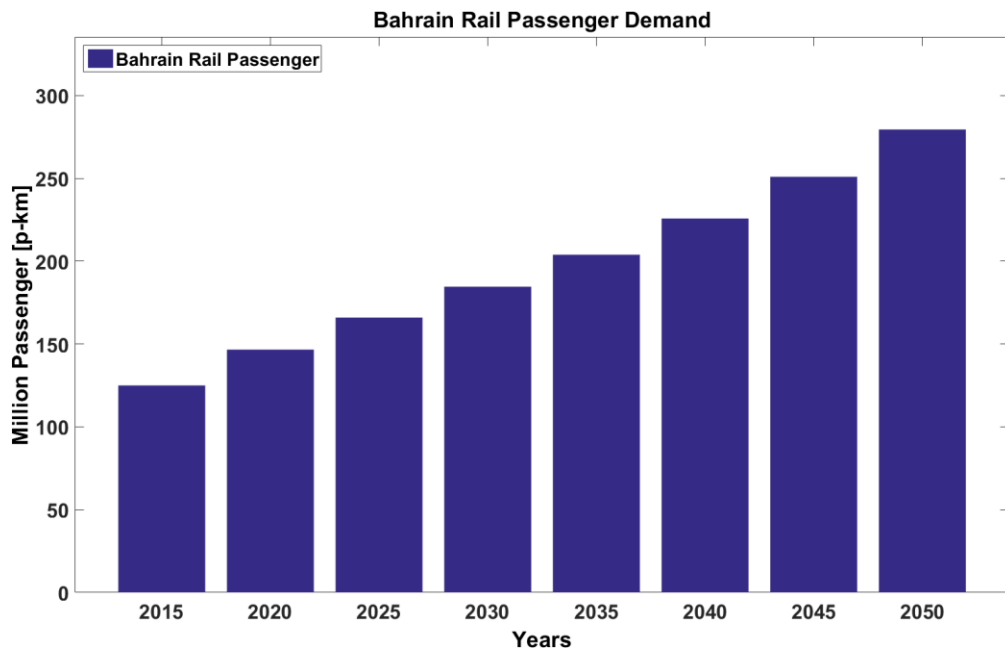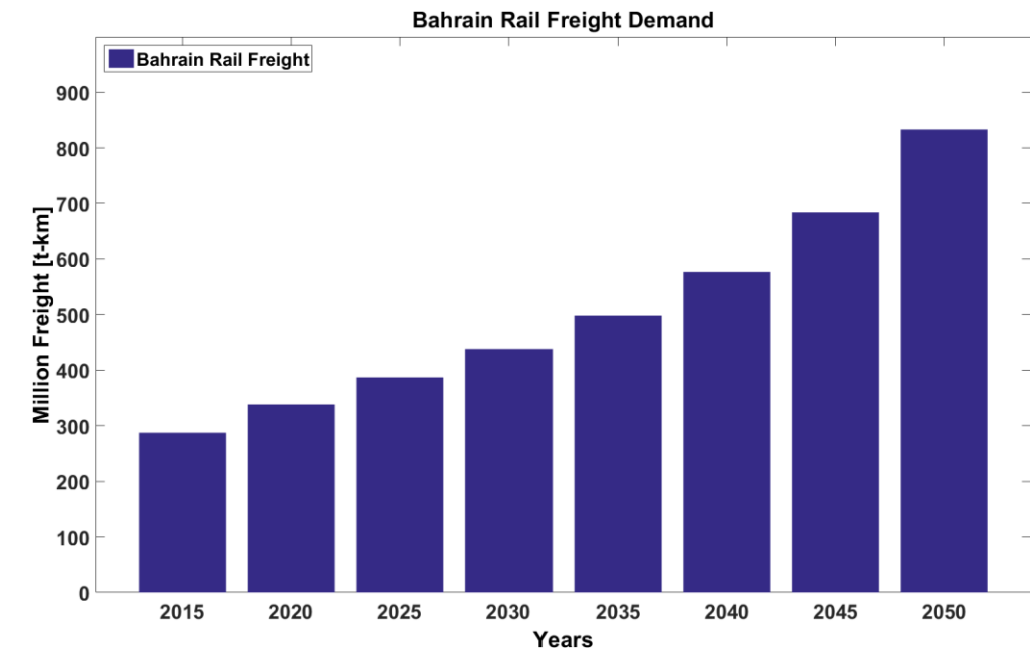

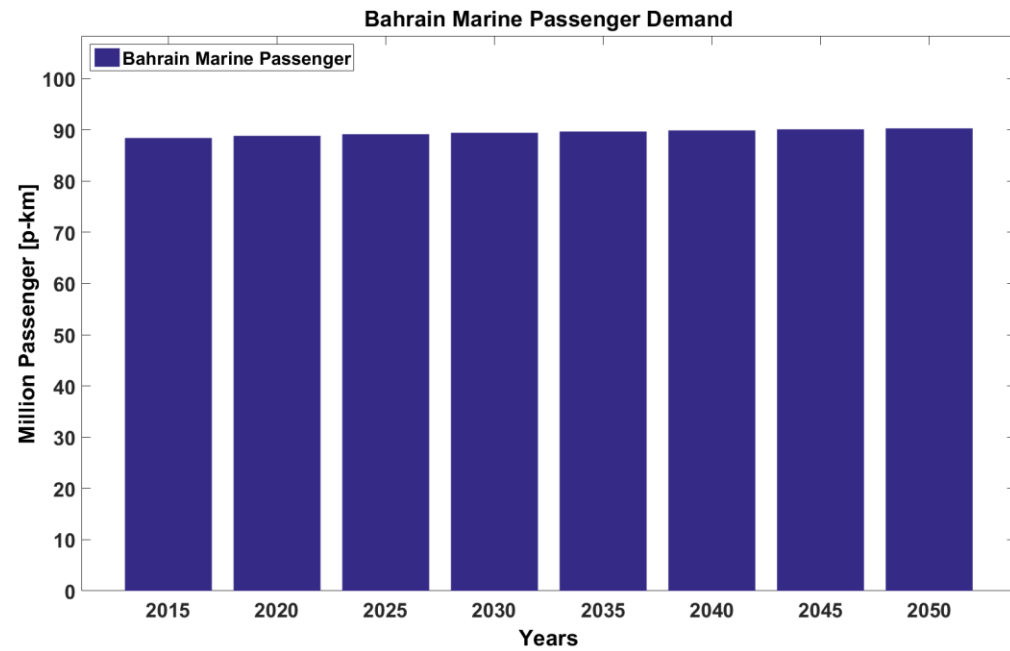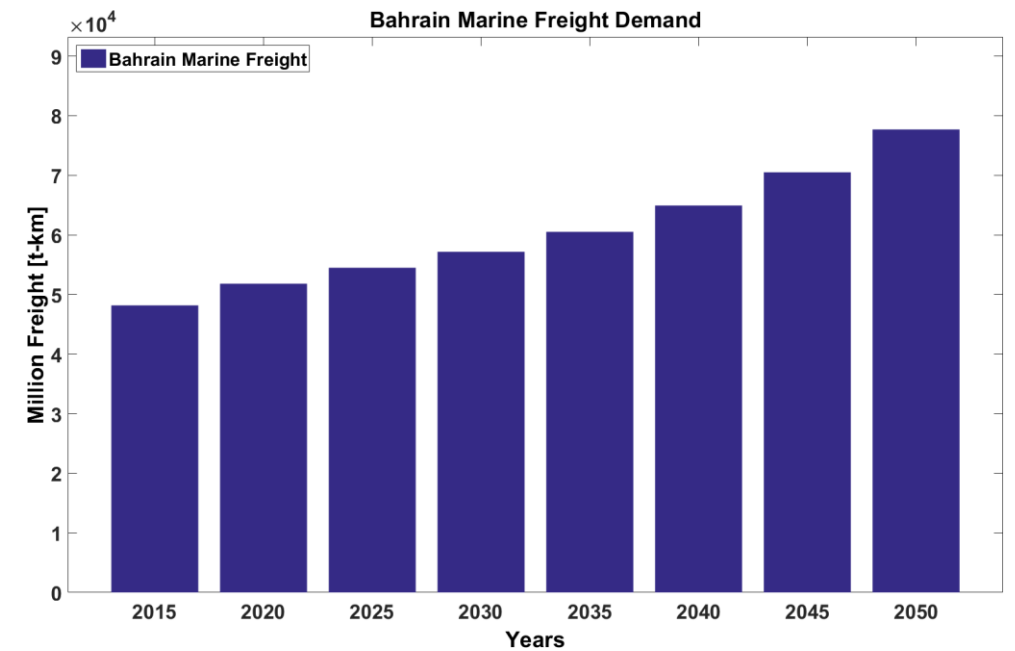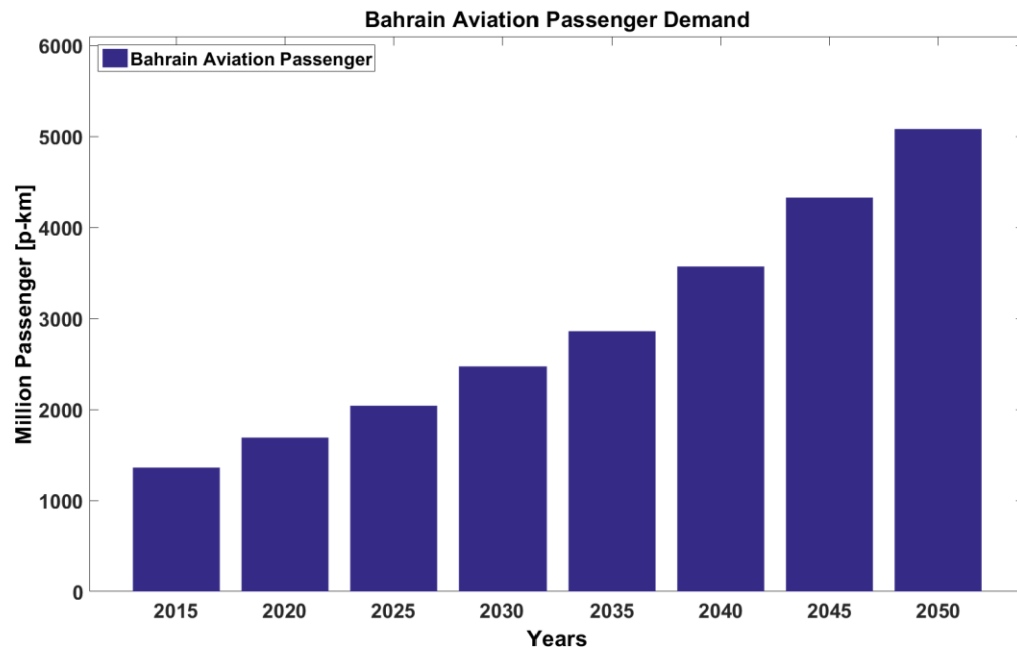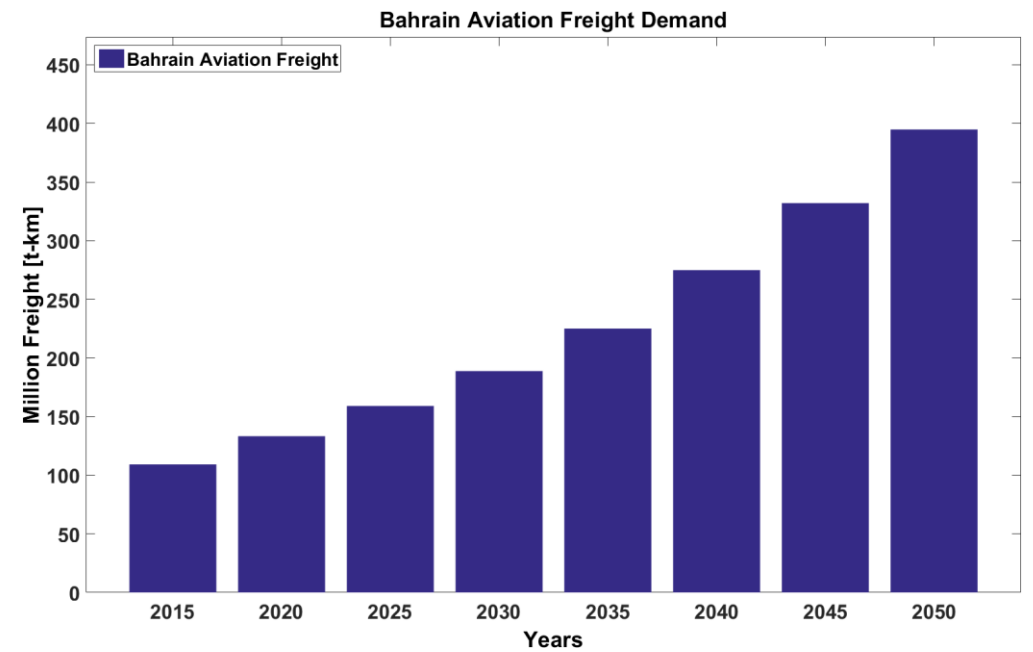

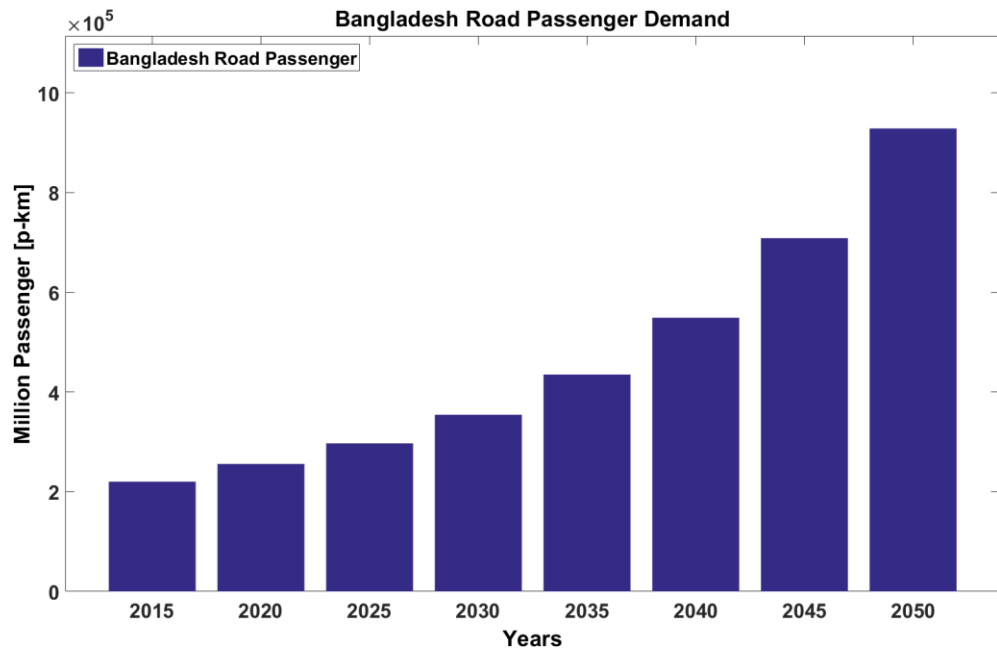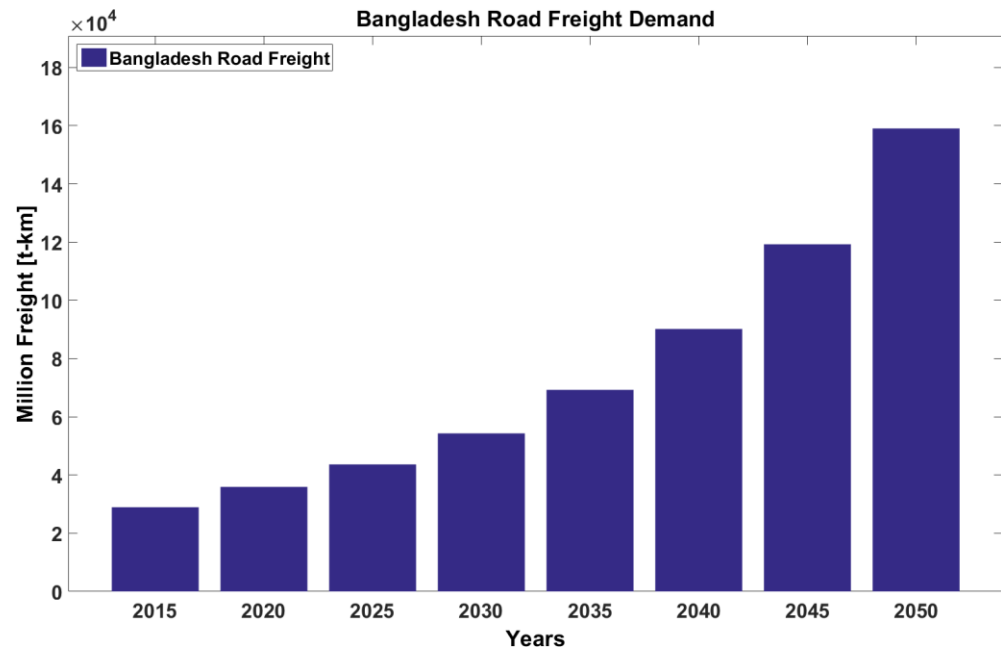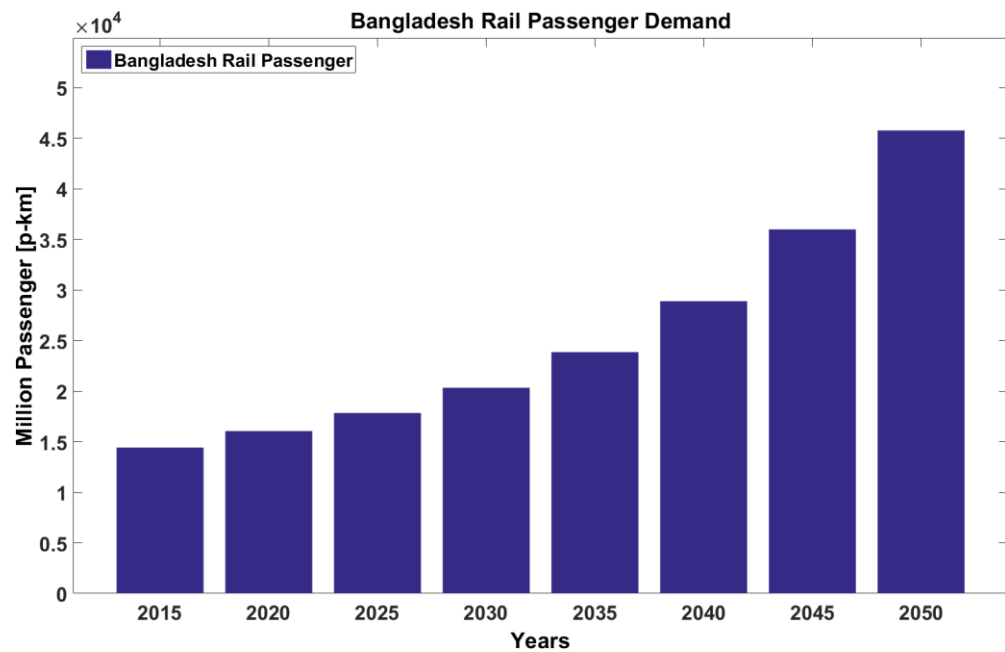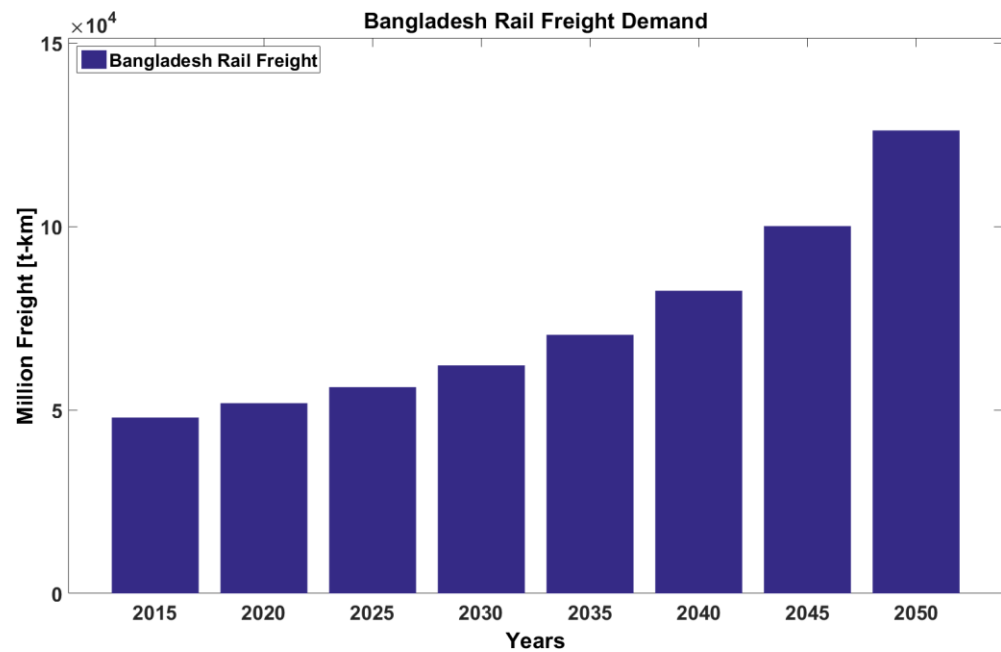



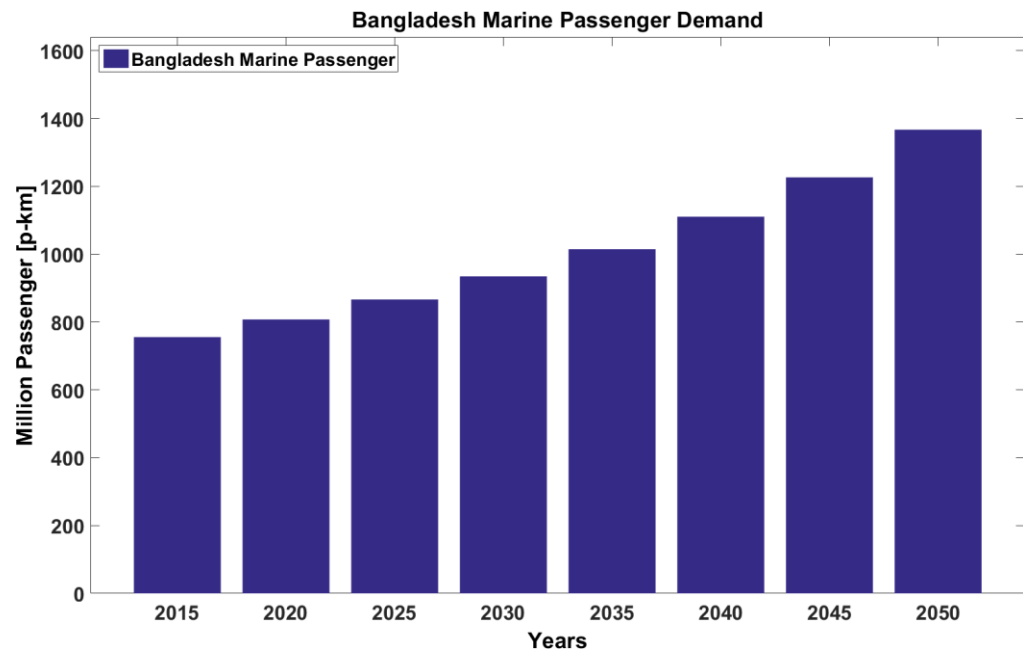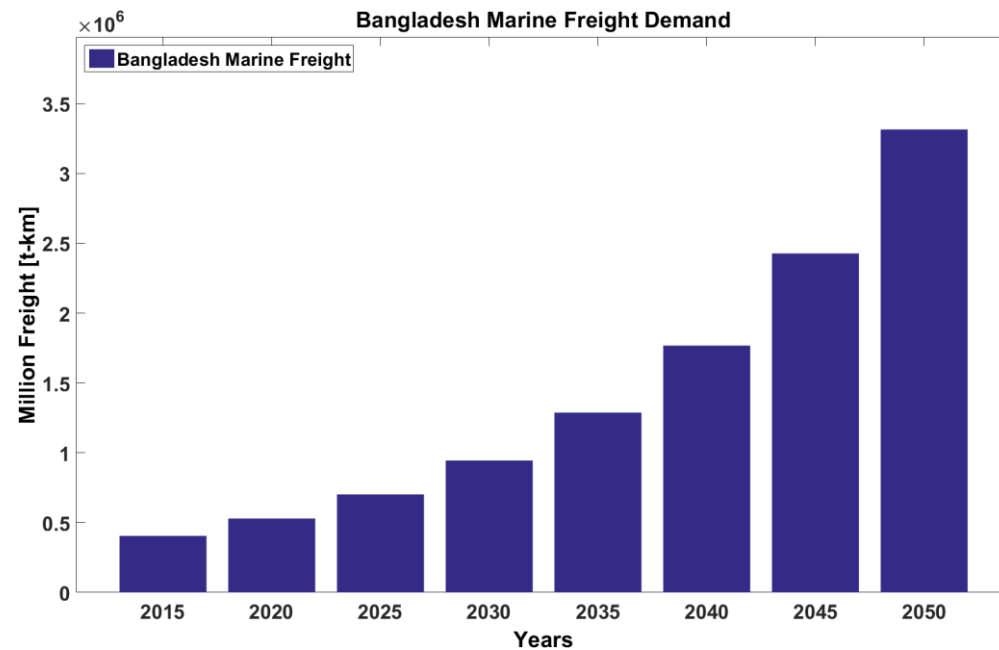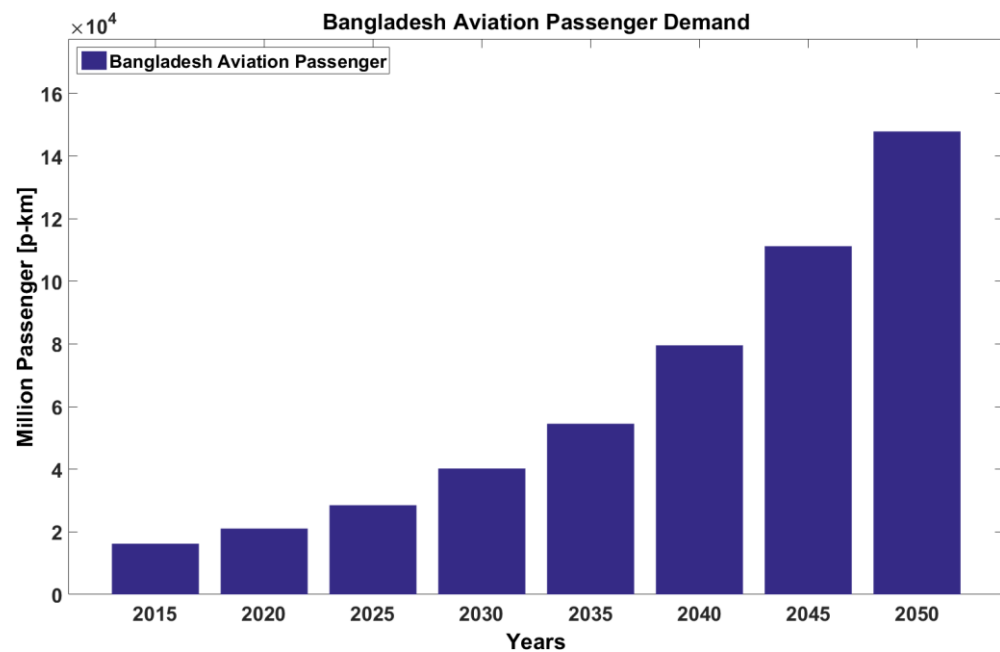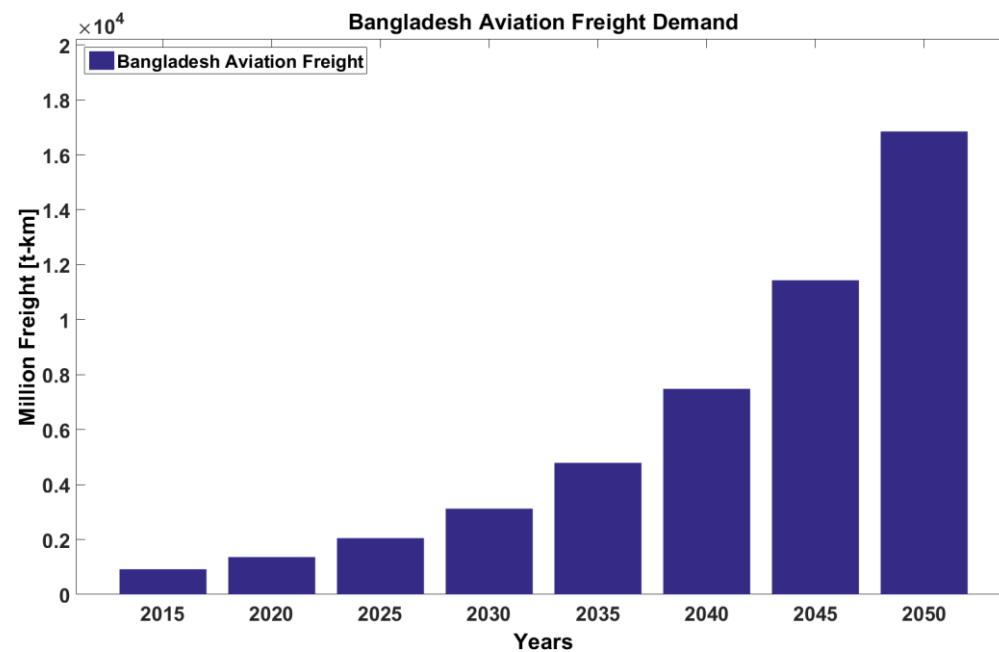

Barbados Road Passenger Demand

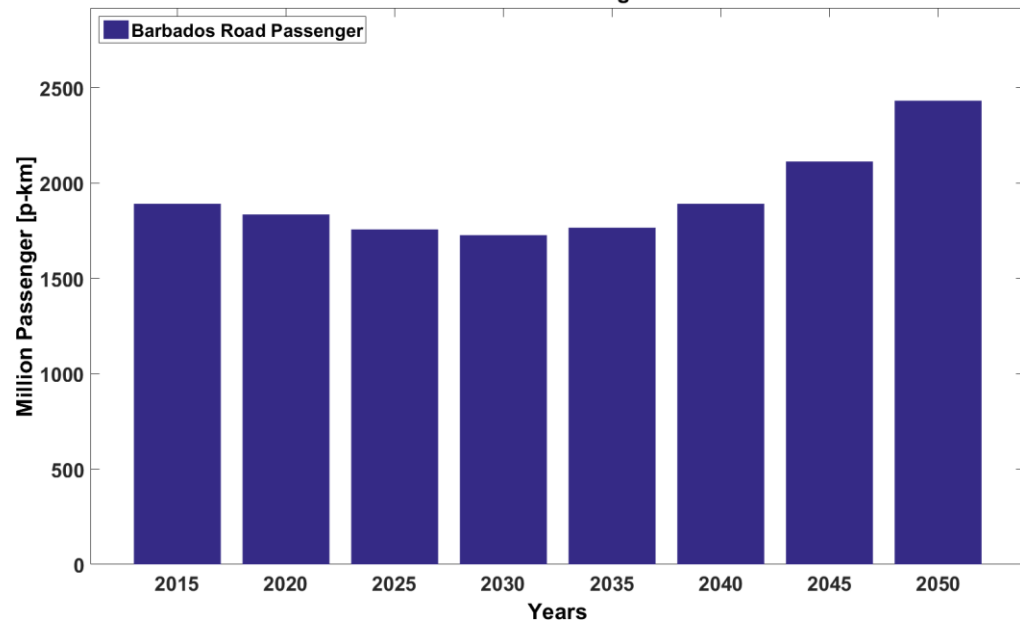

Barbados Road Freight Demand

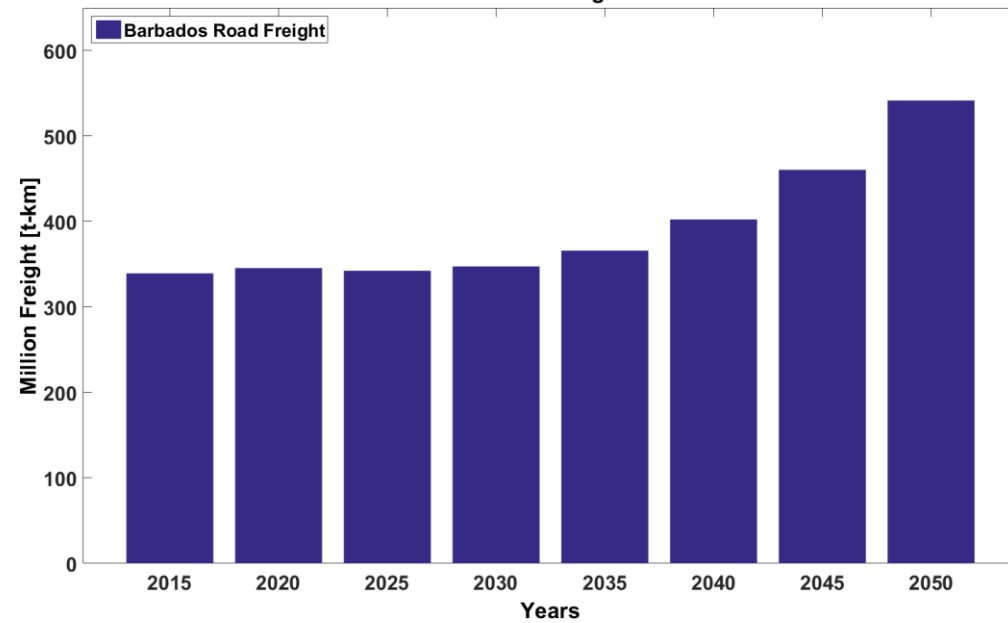

Barbados Rail Passenger Demand

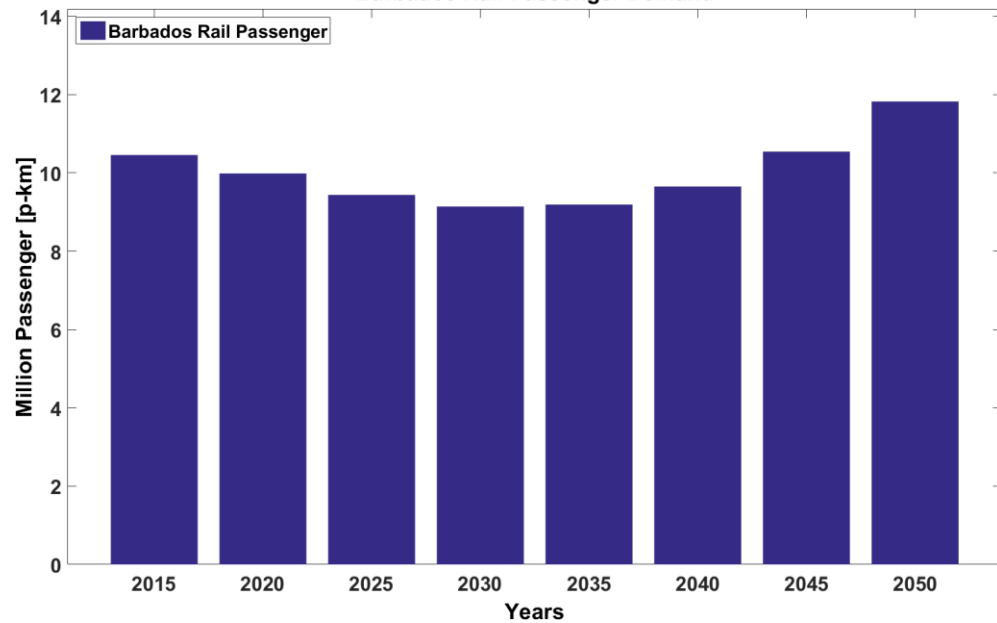

Barbados Rail Freight Demand

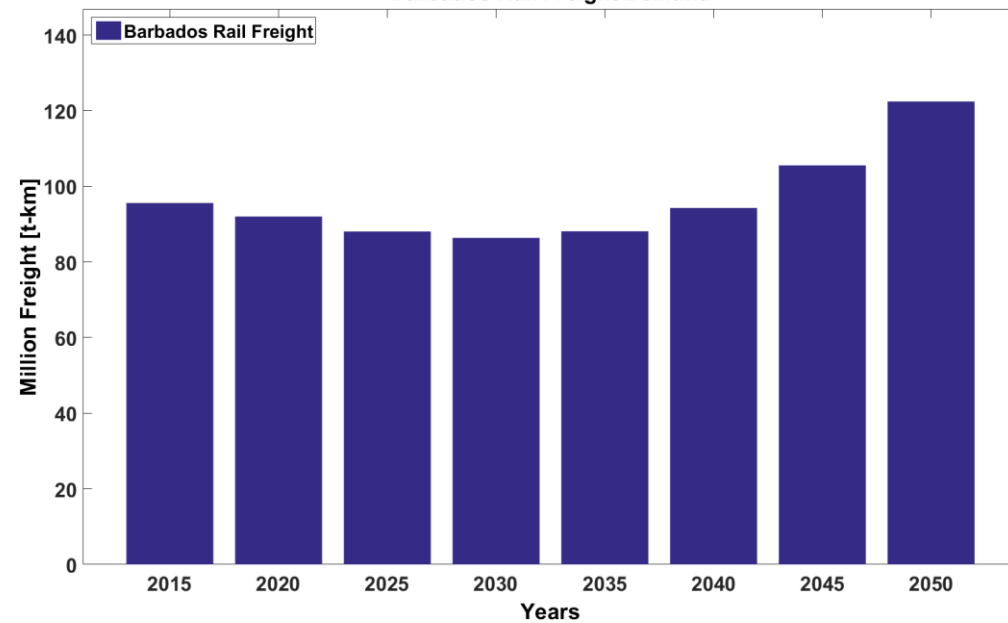

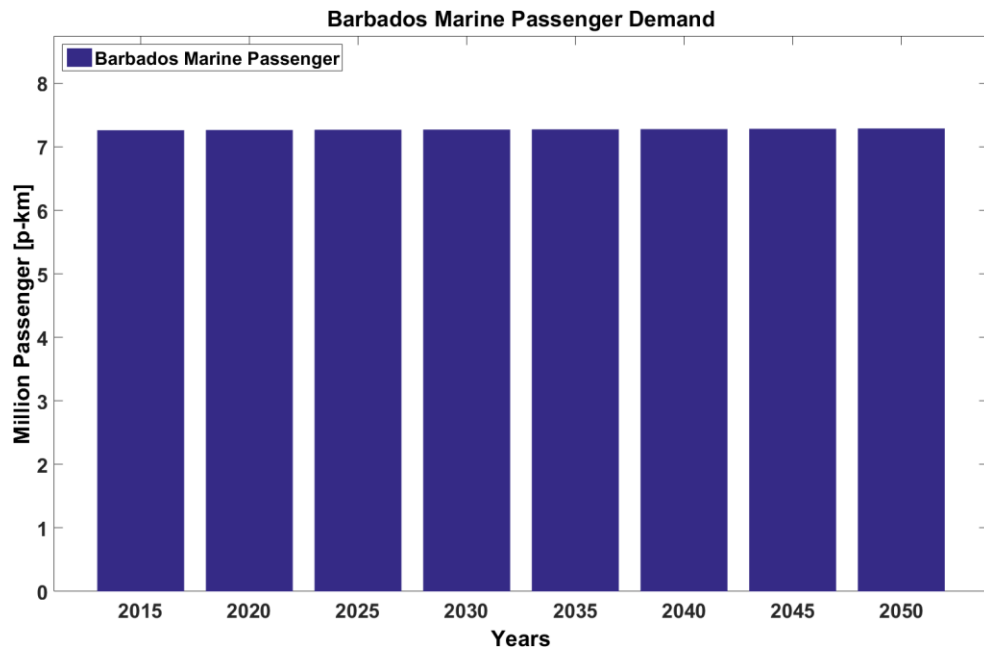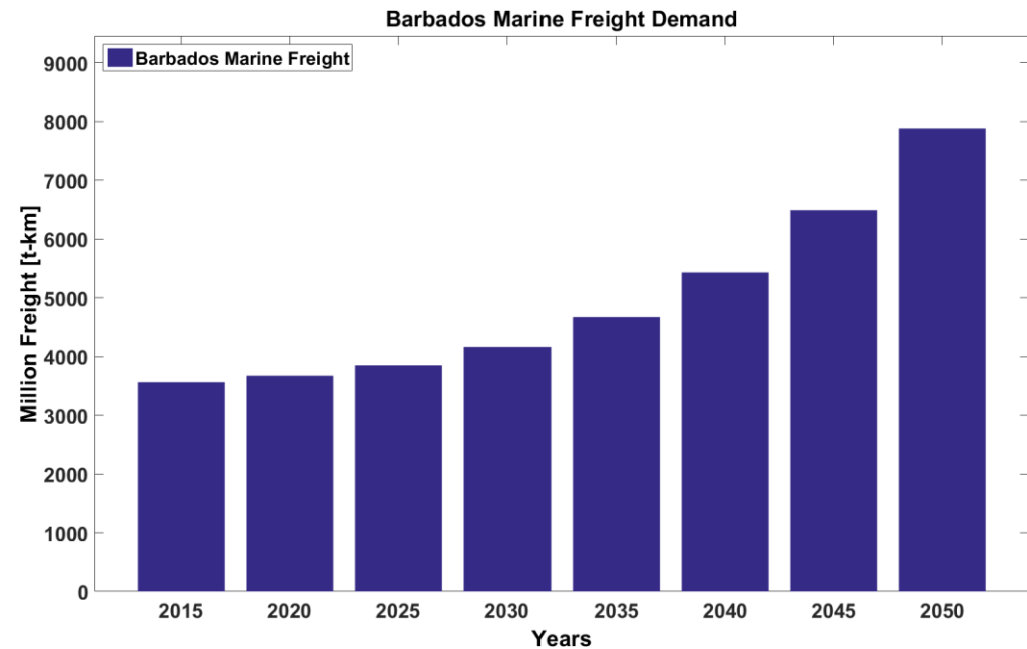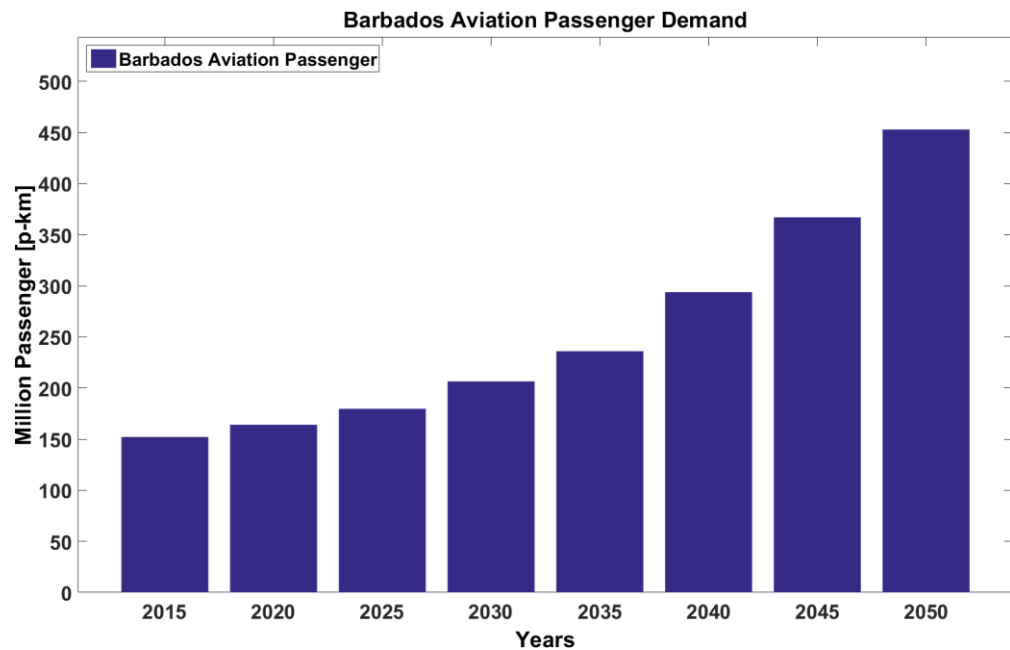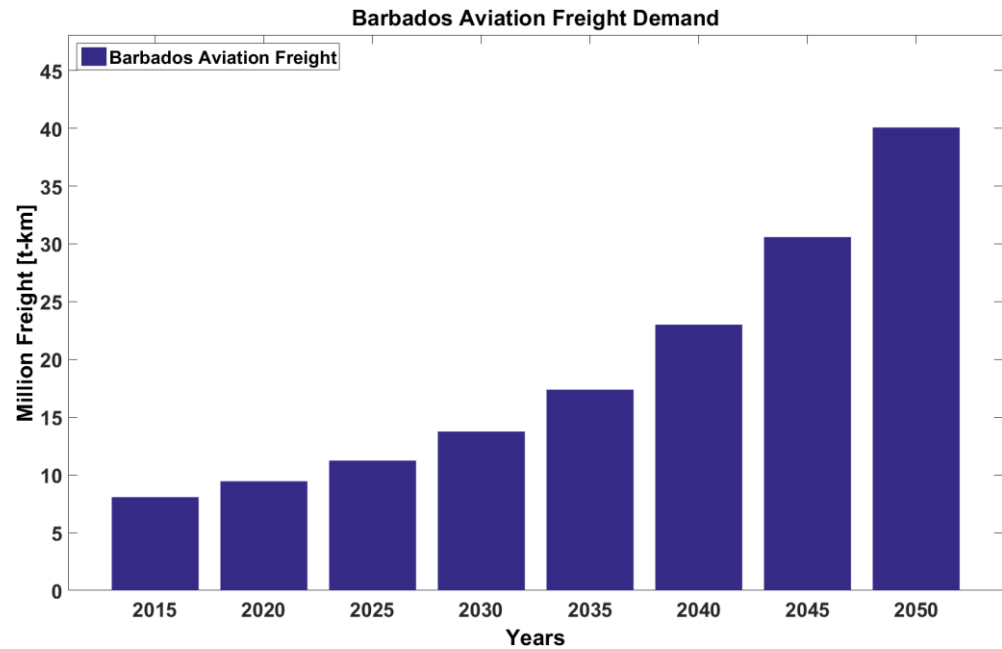

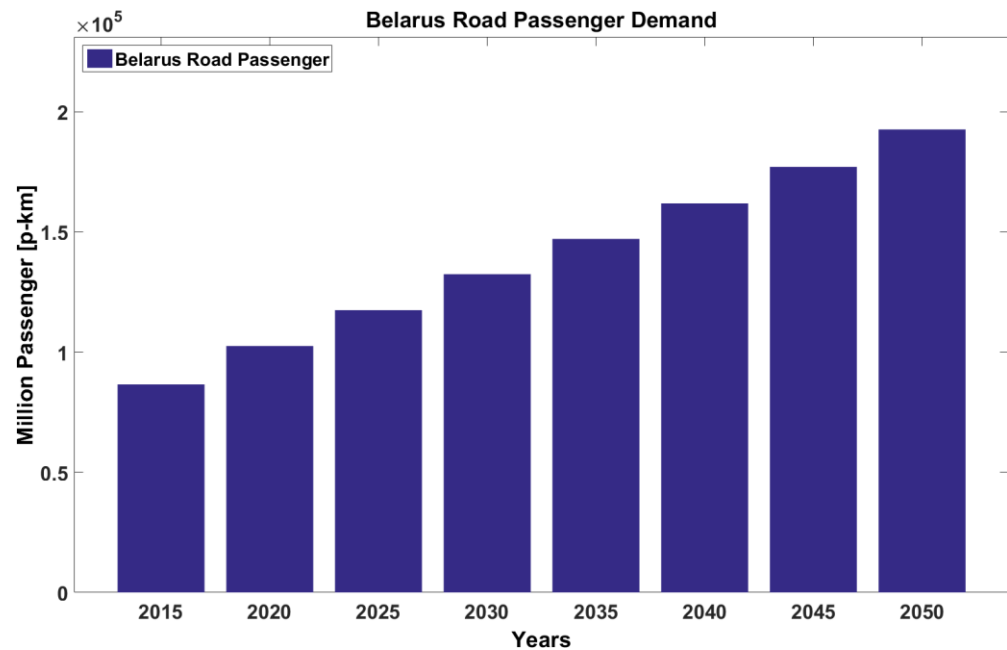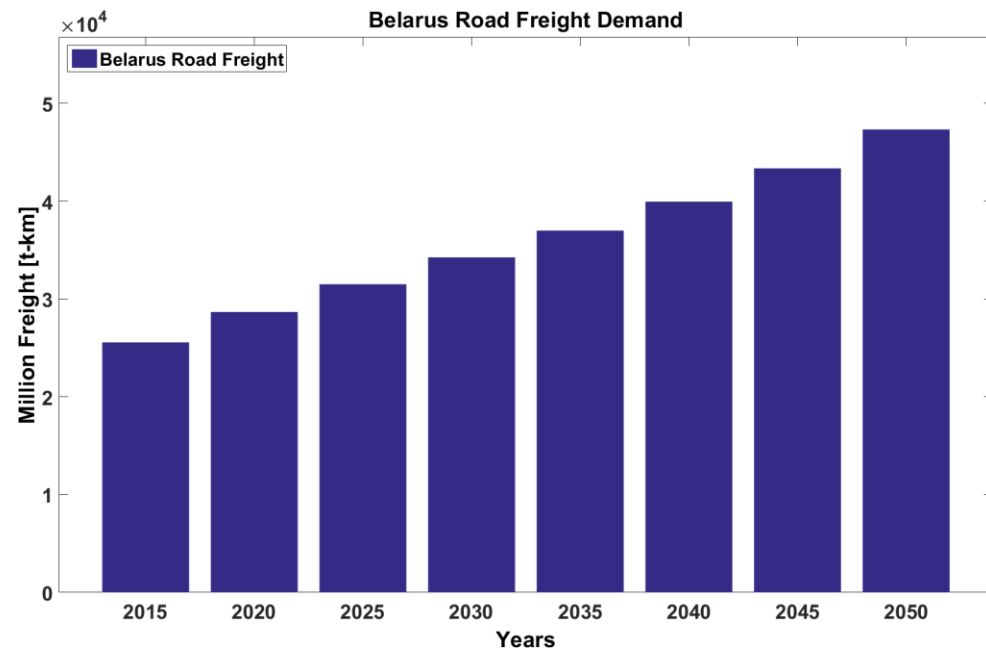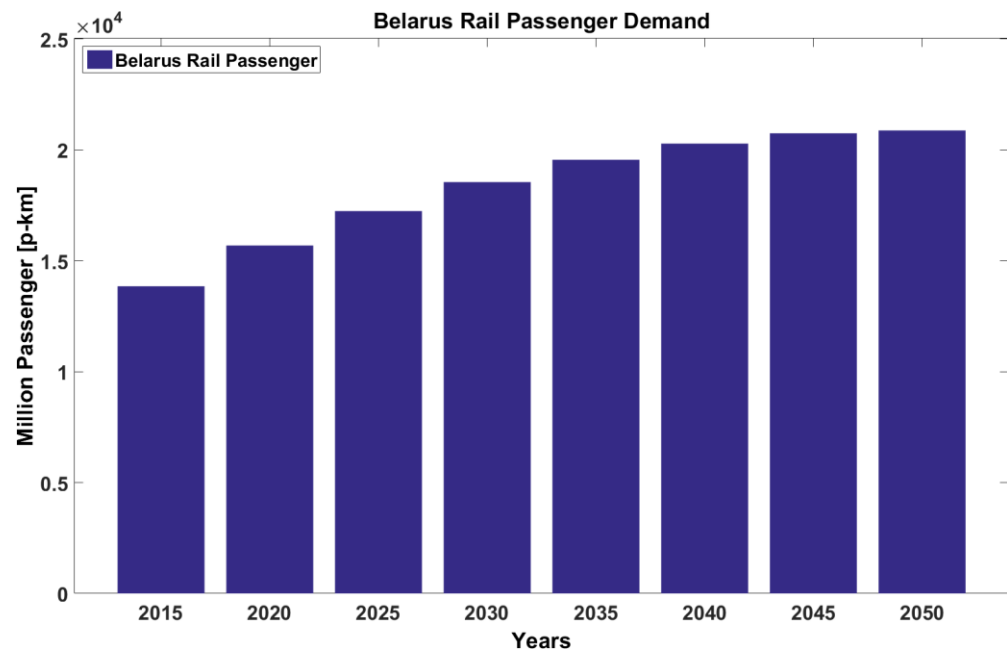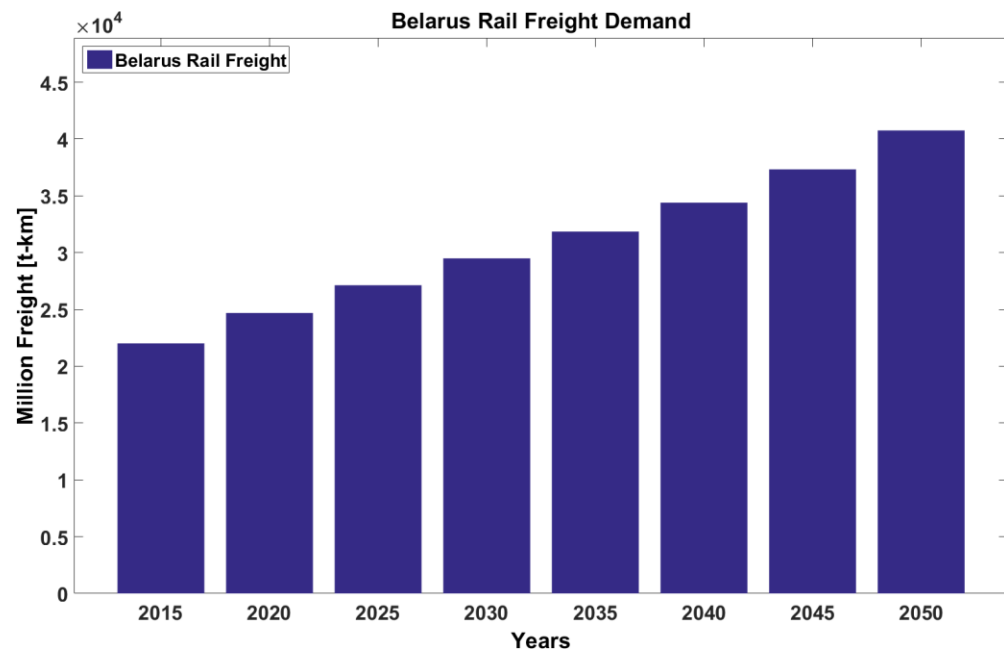

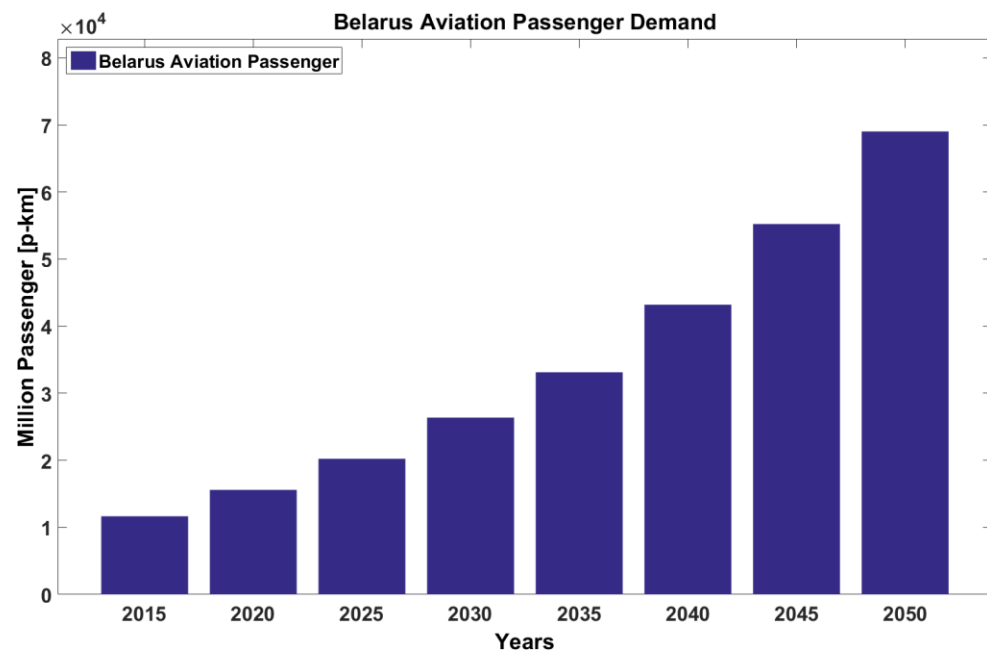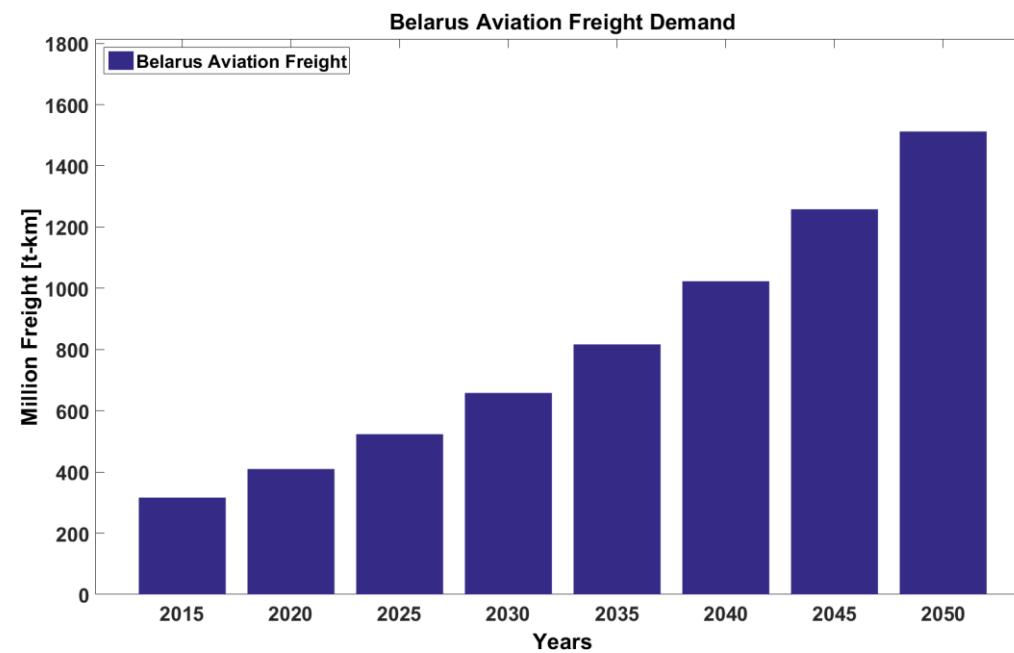

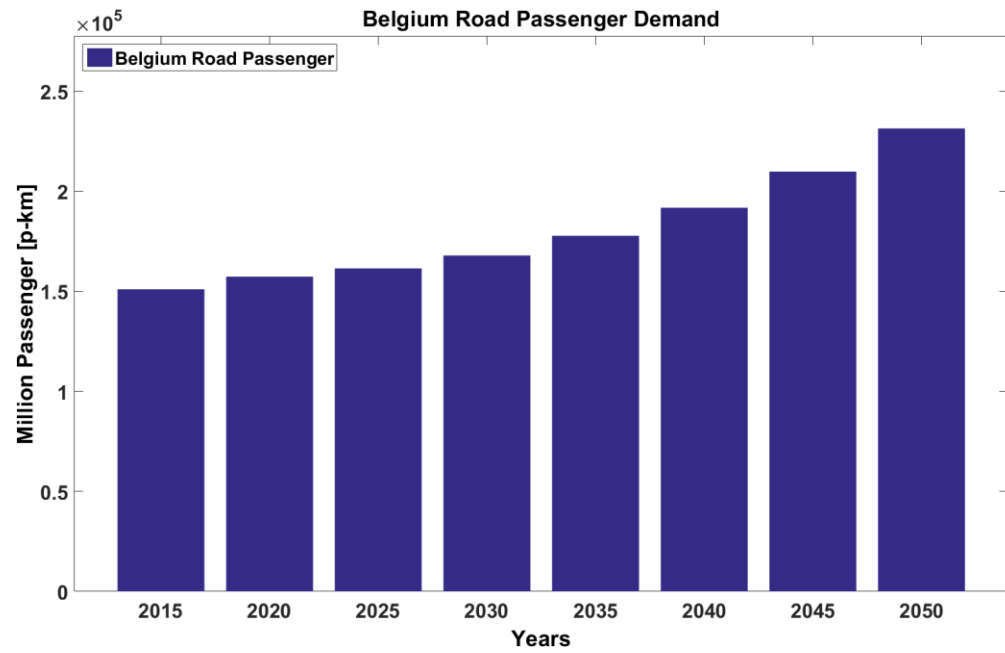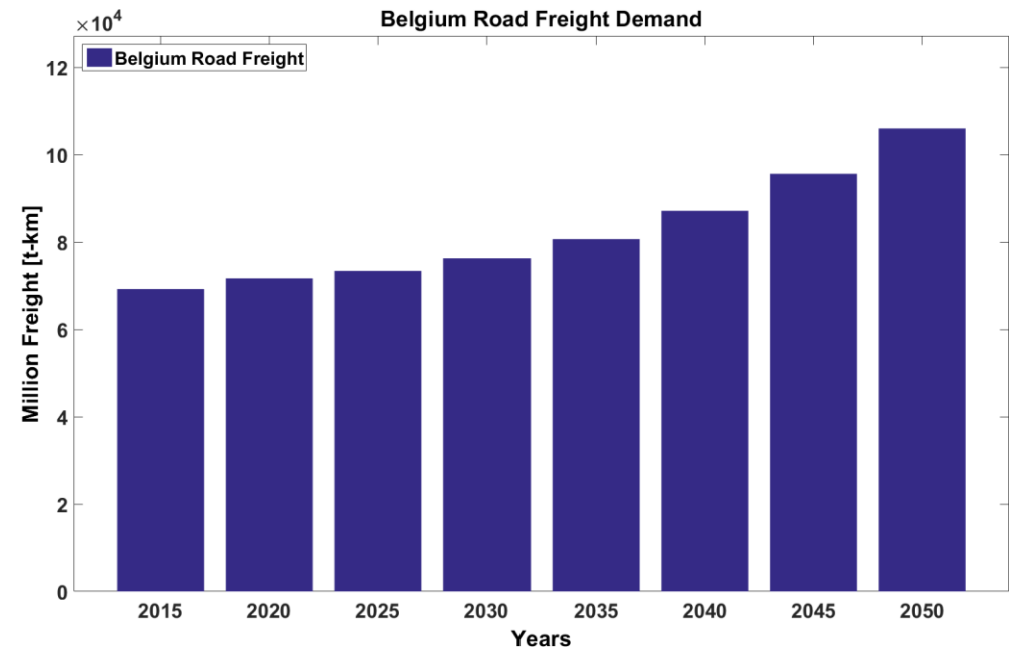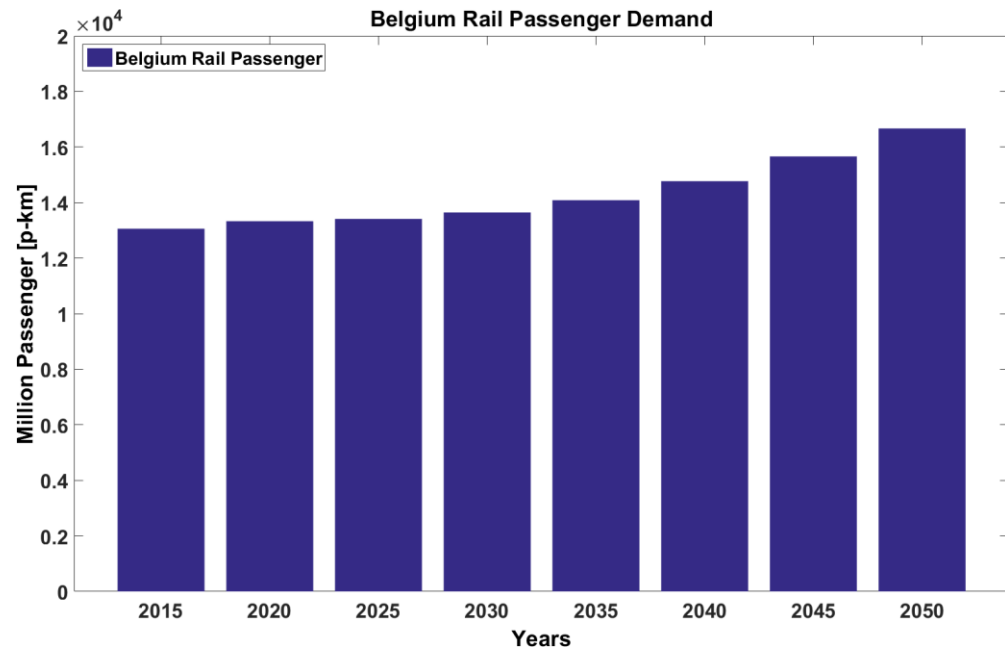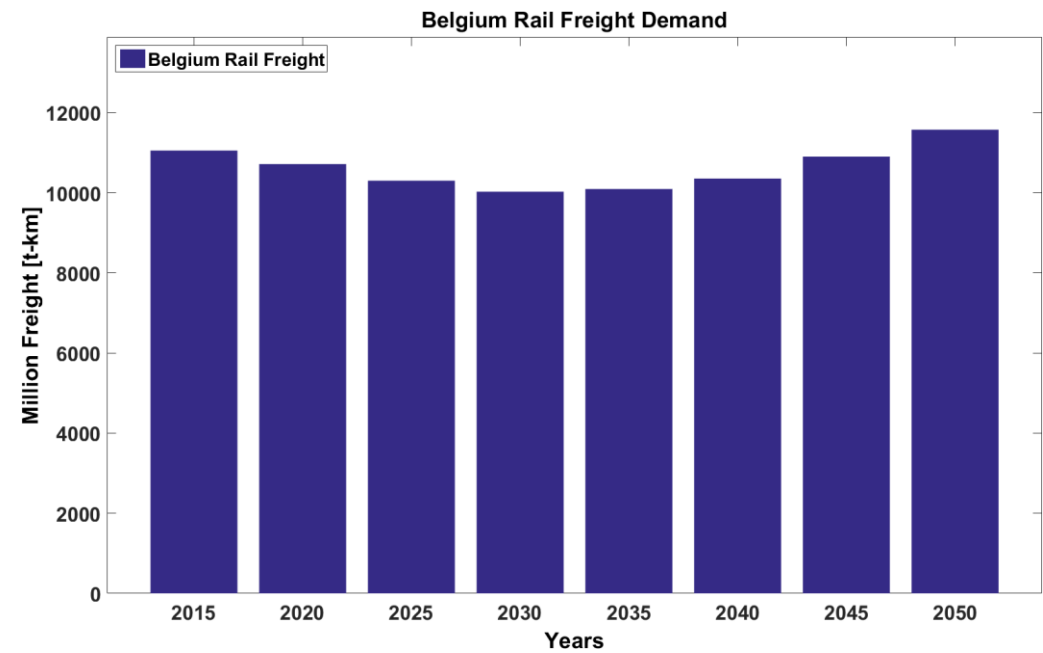

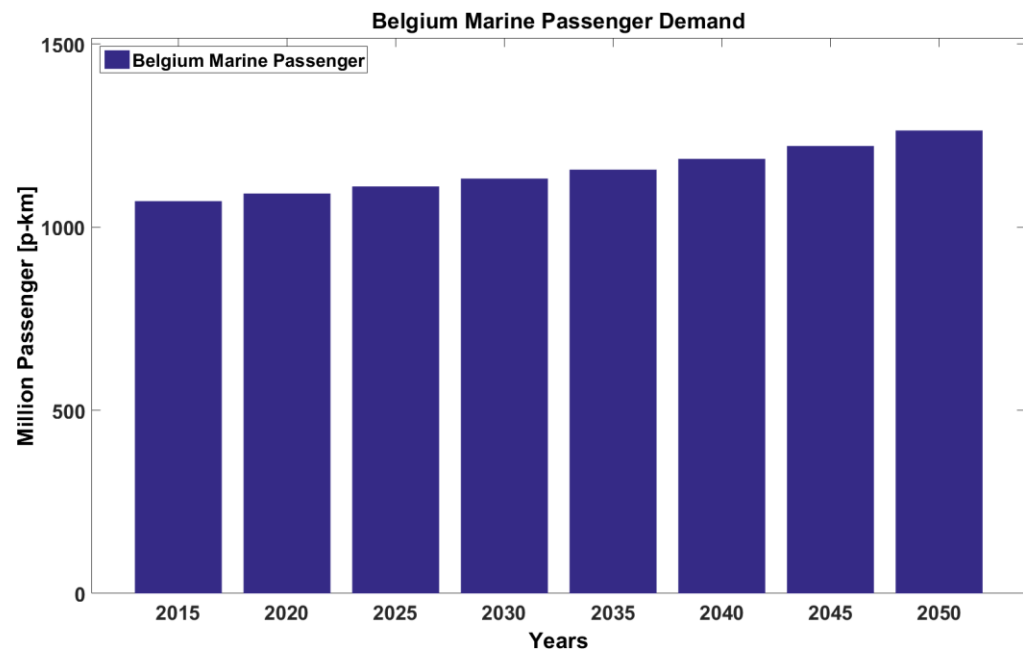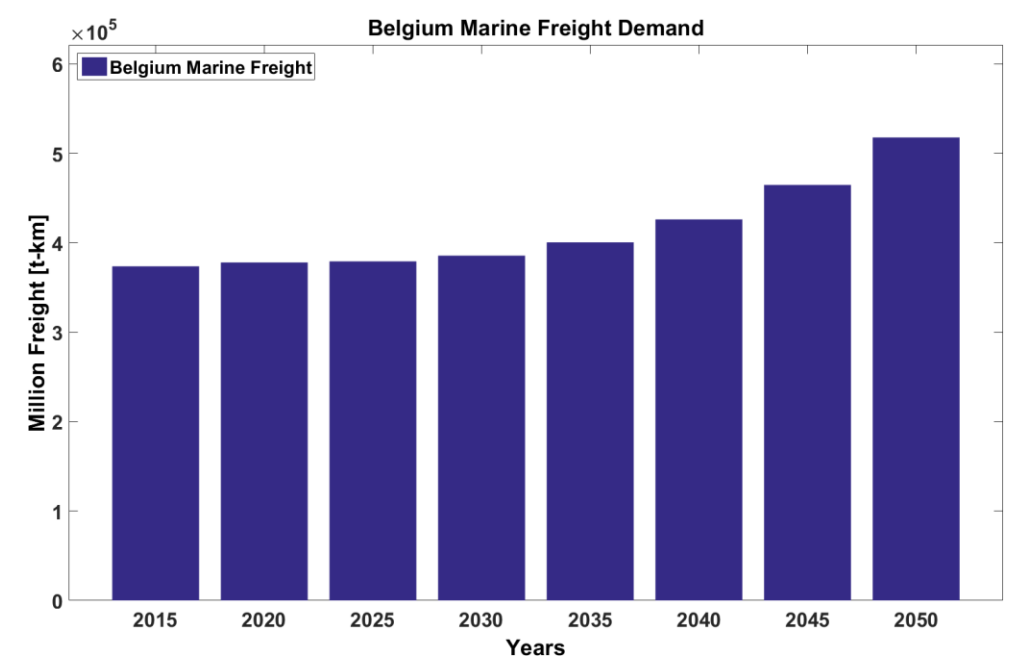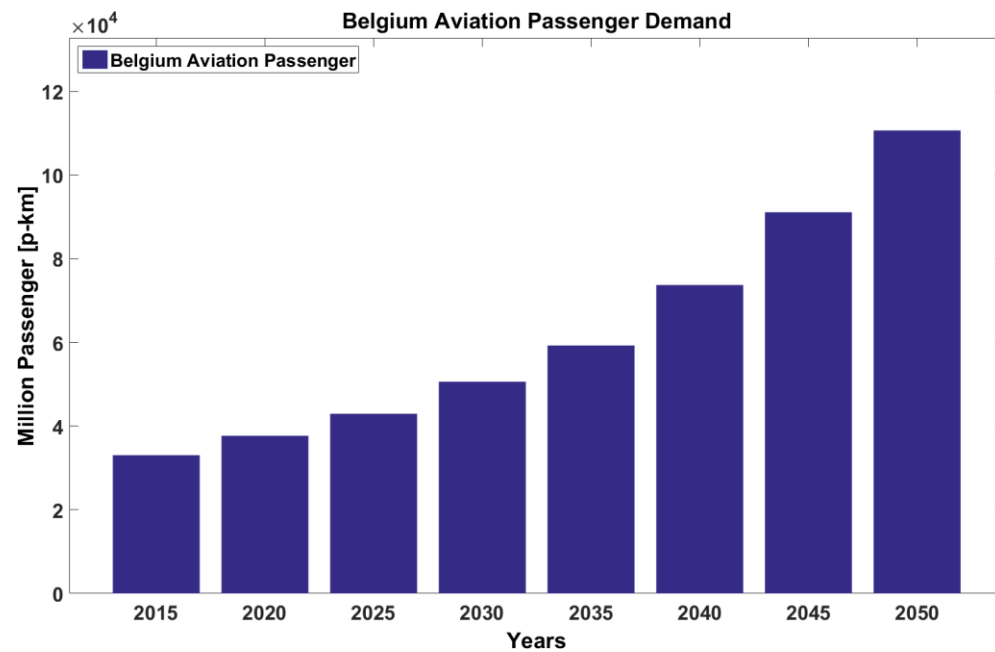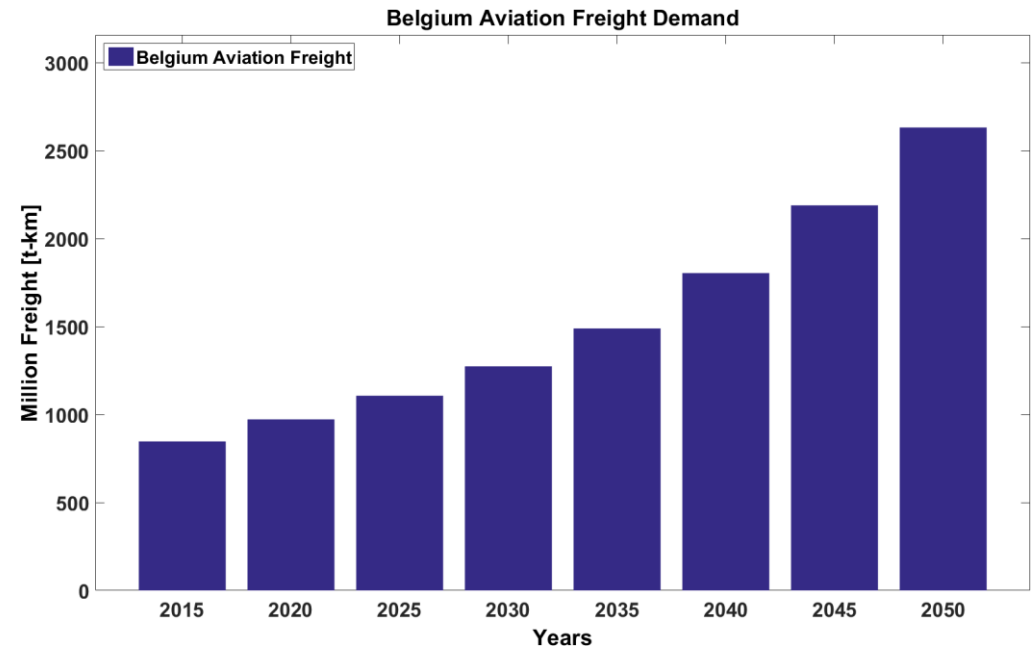

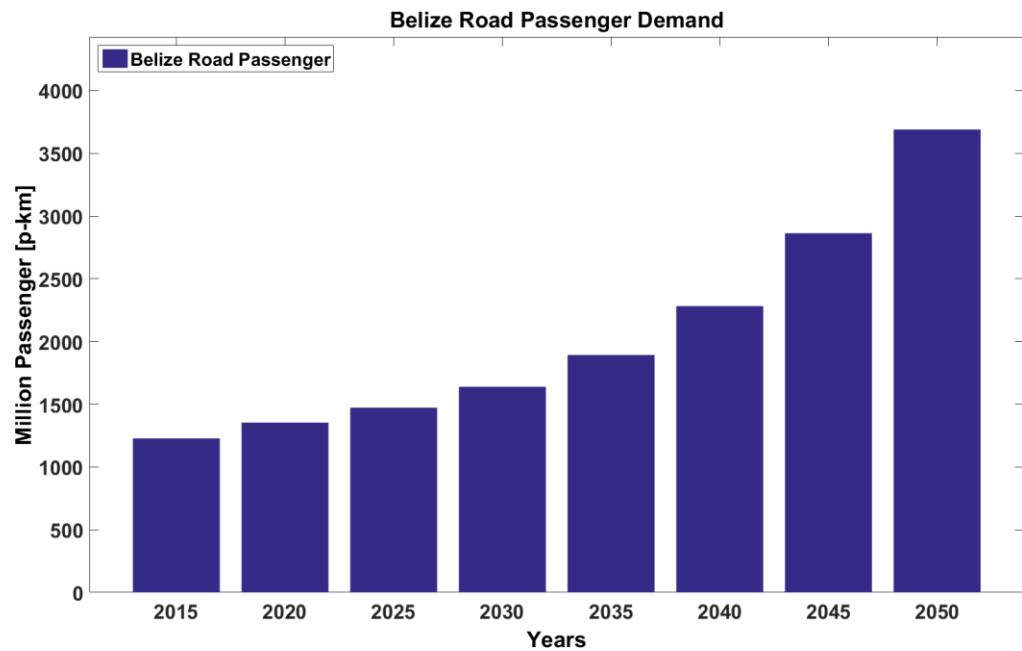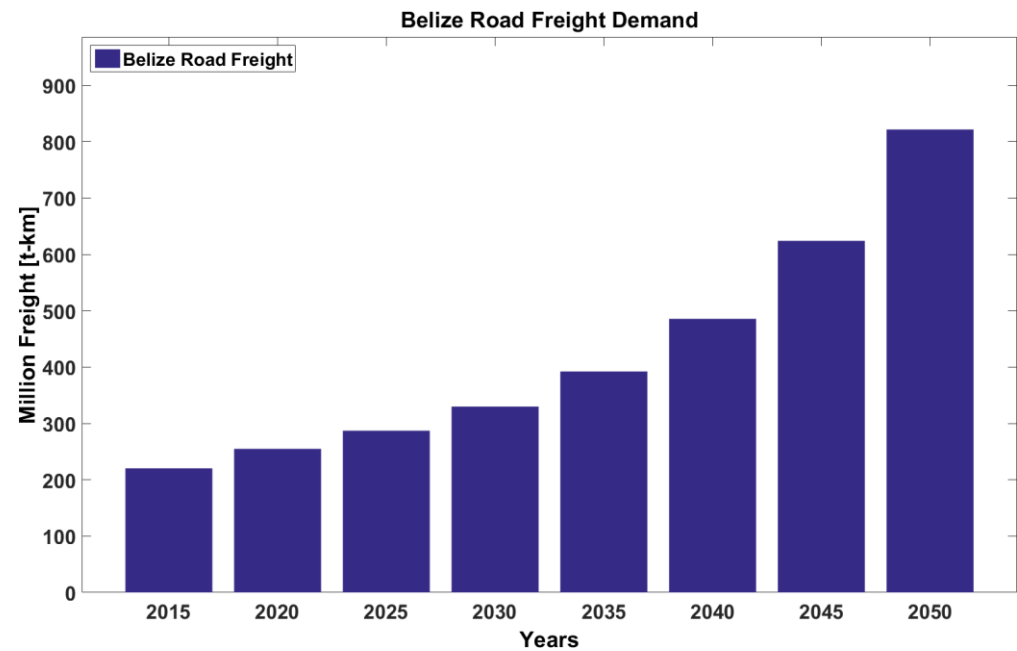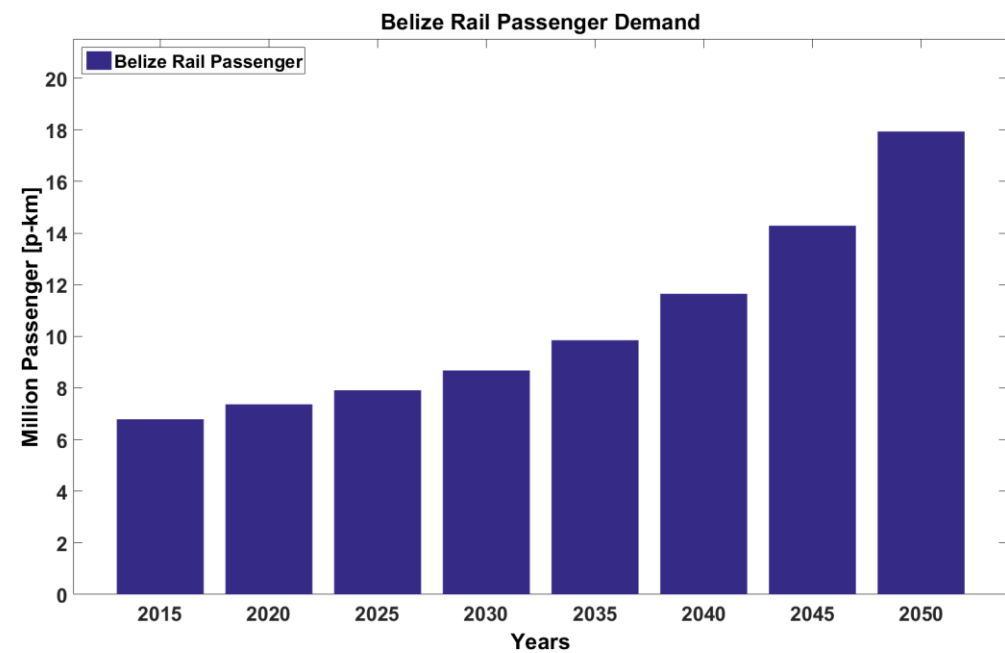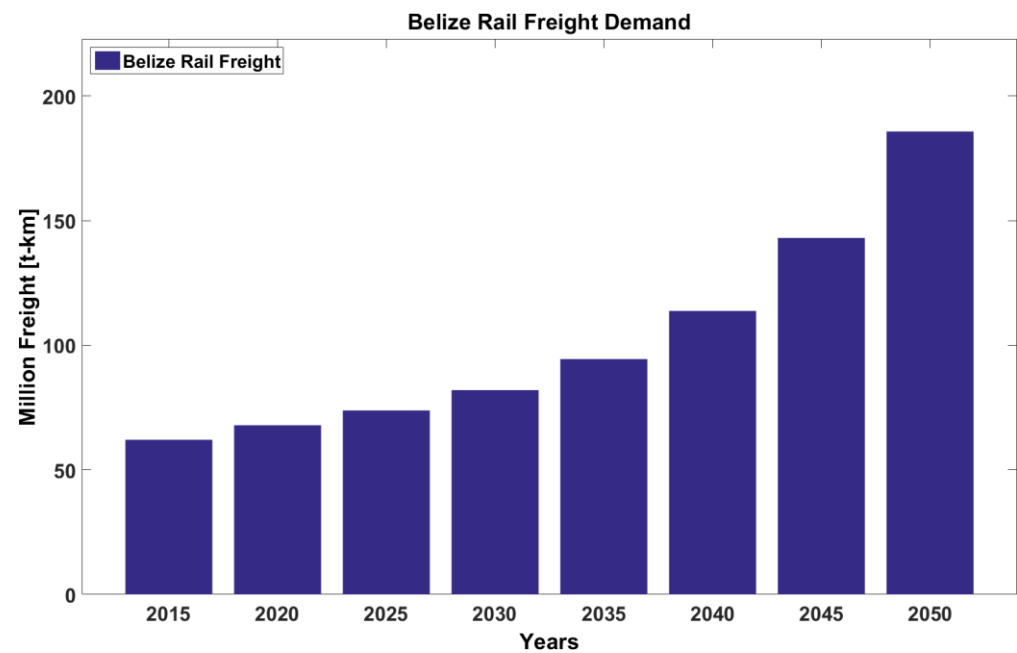



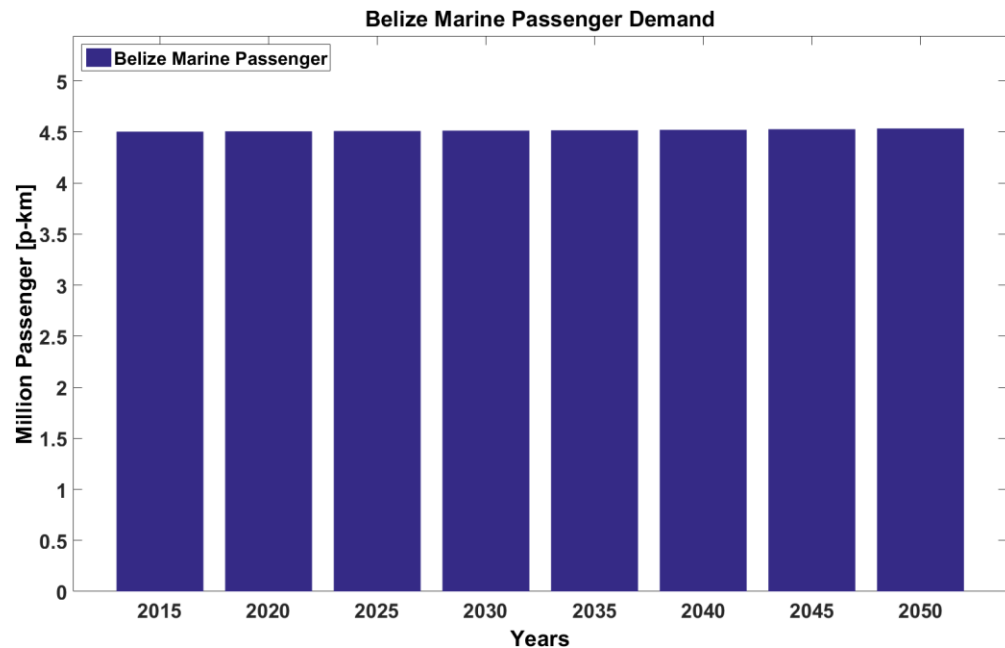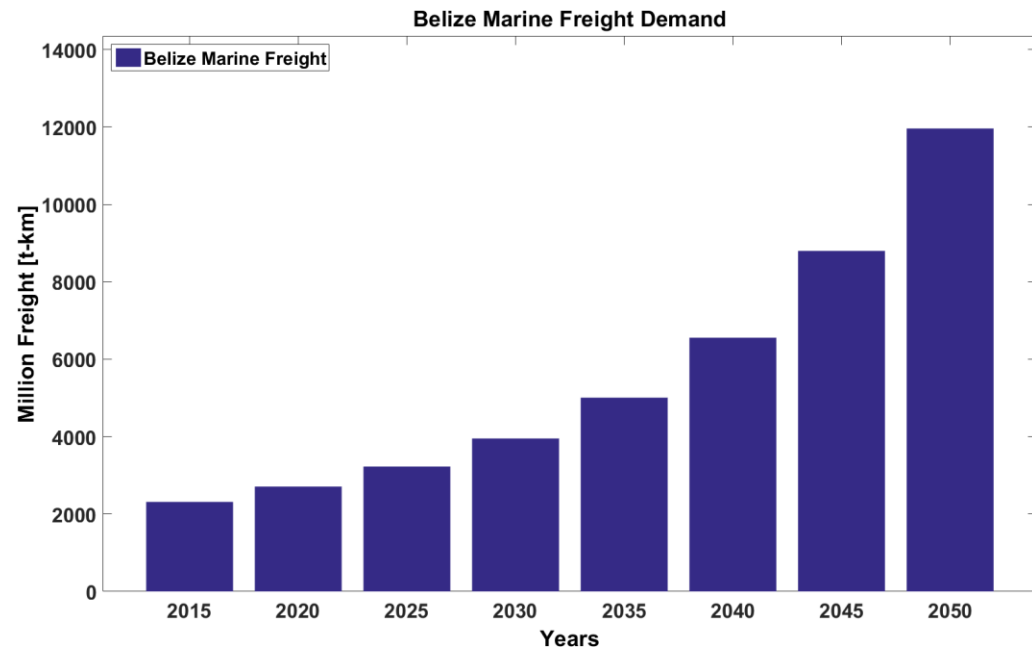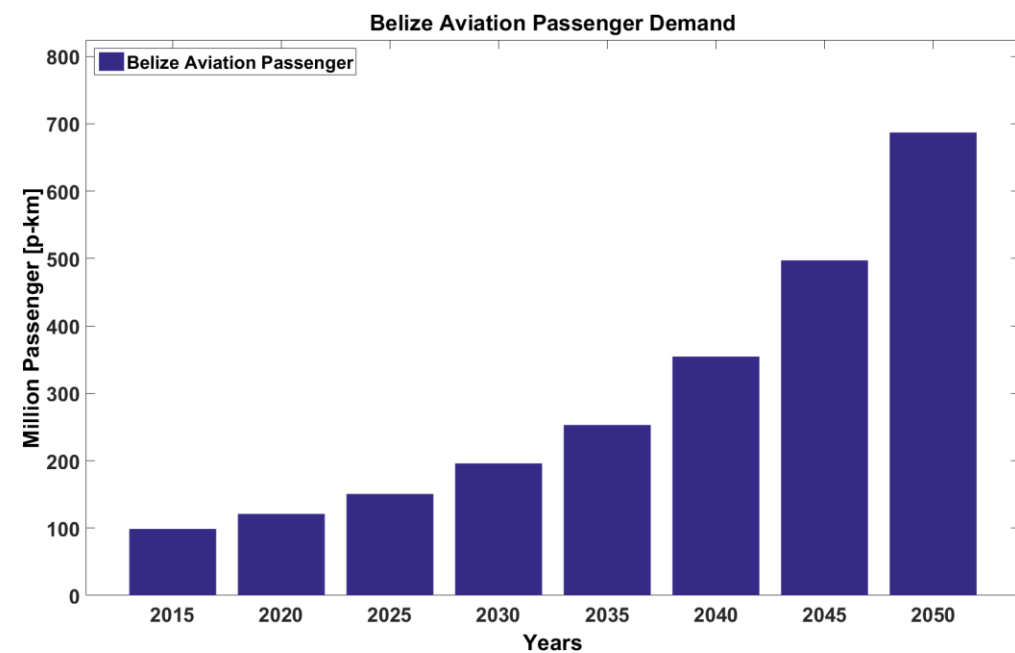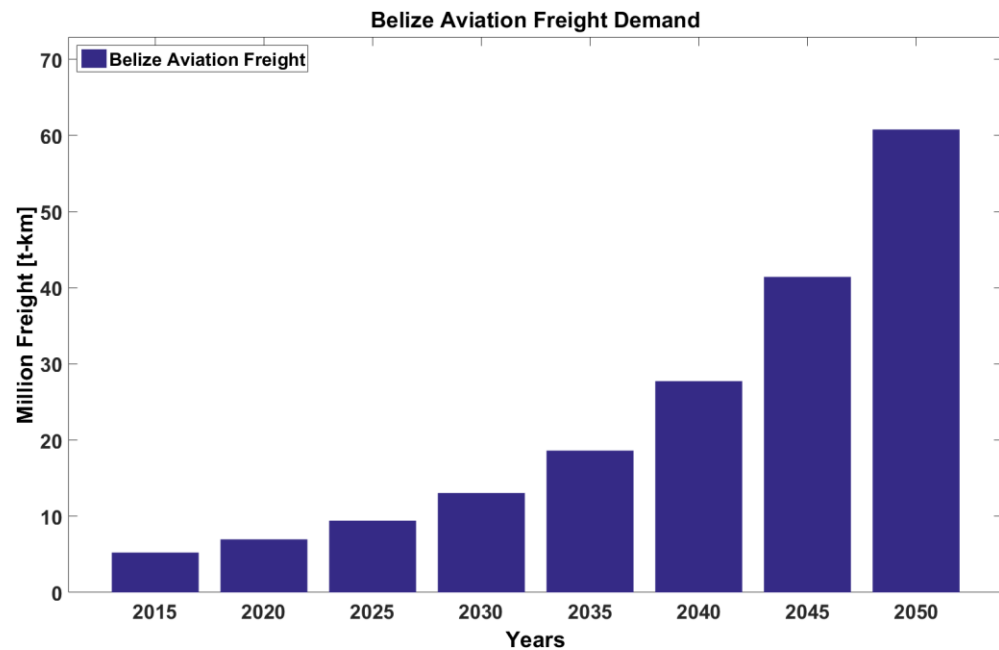

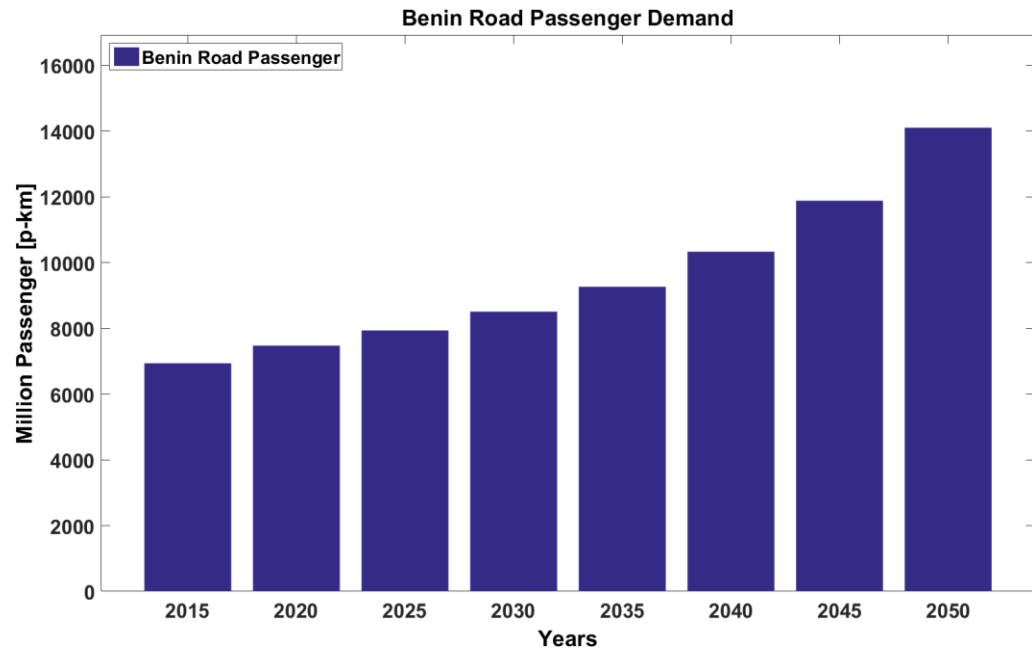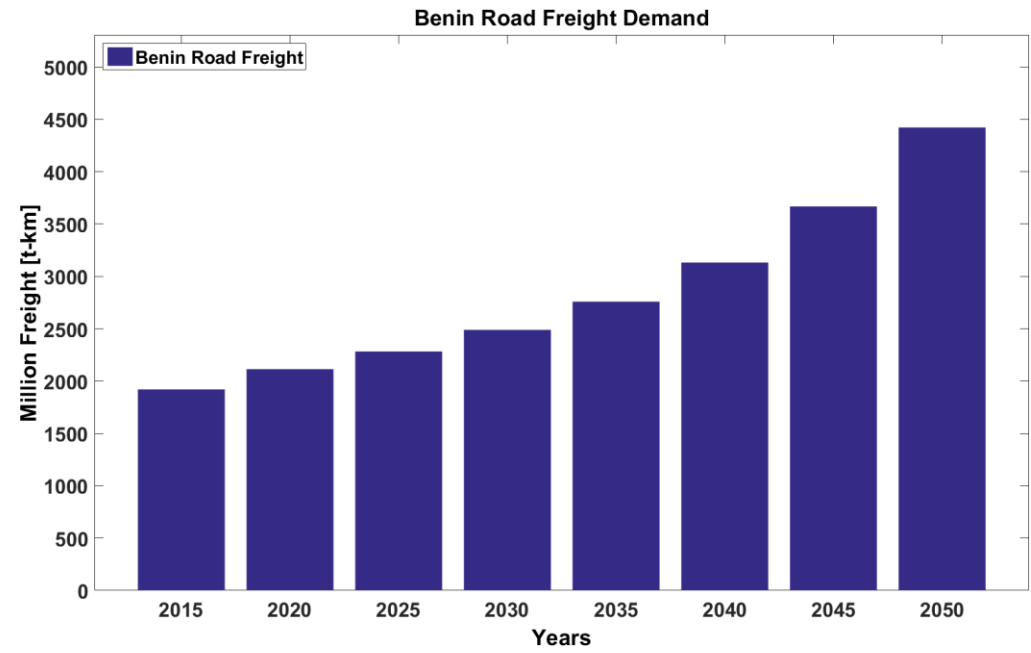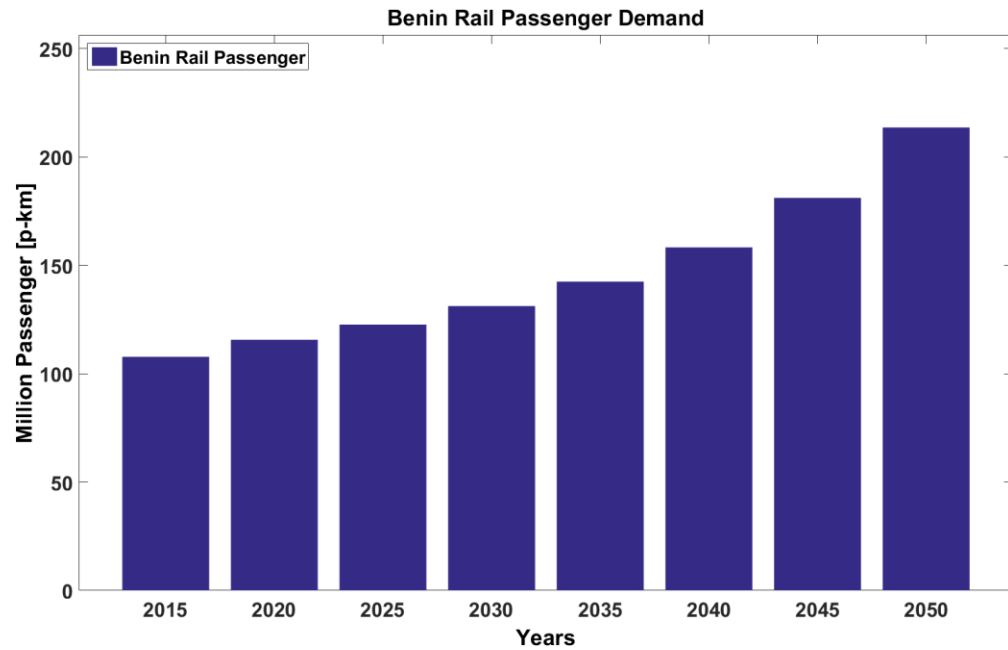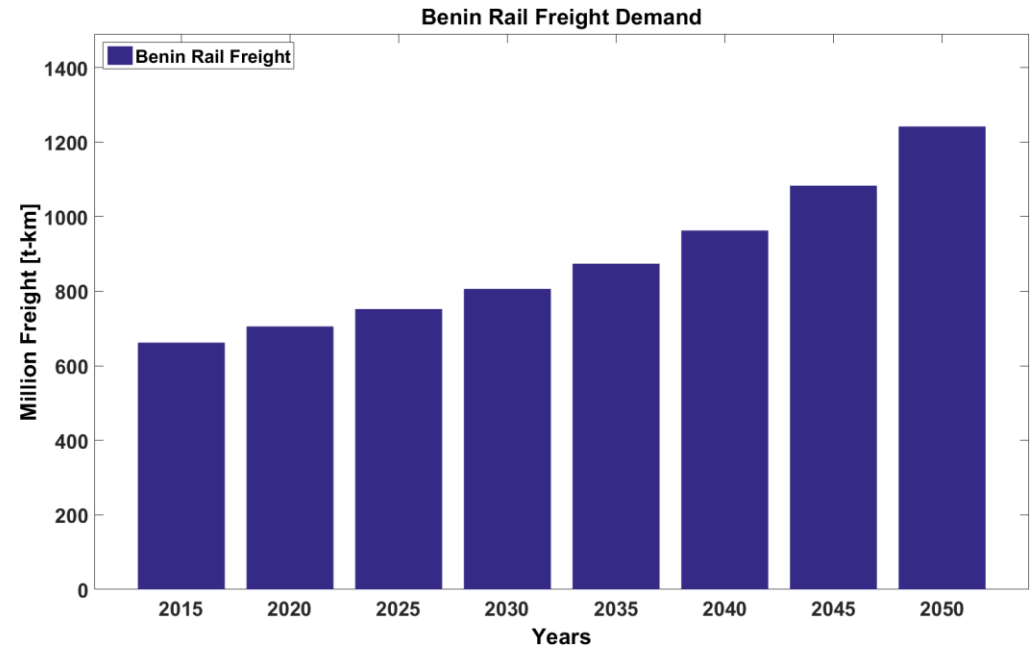

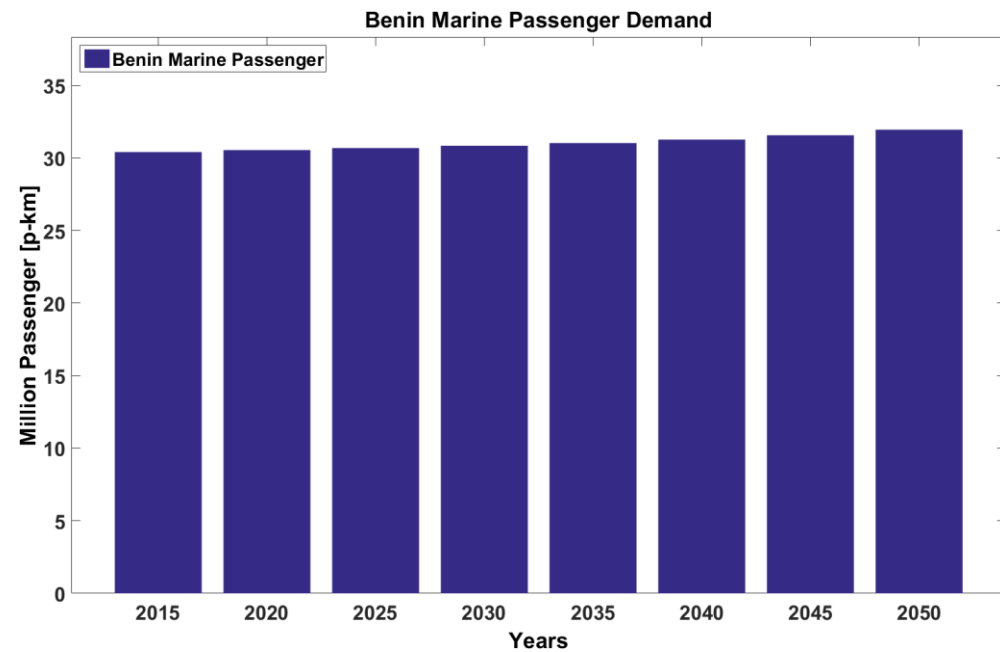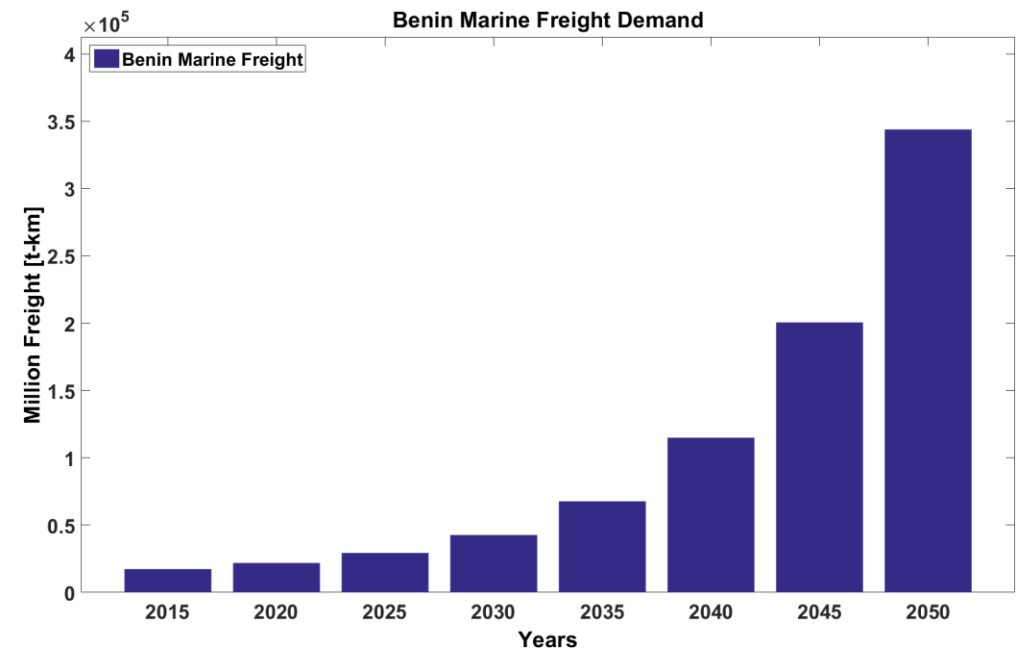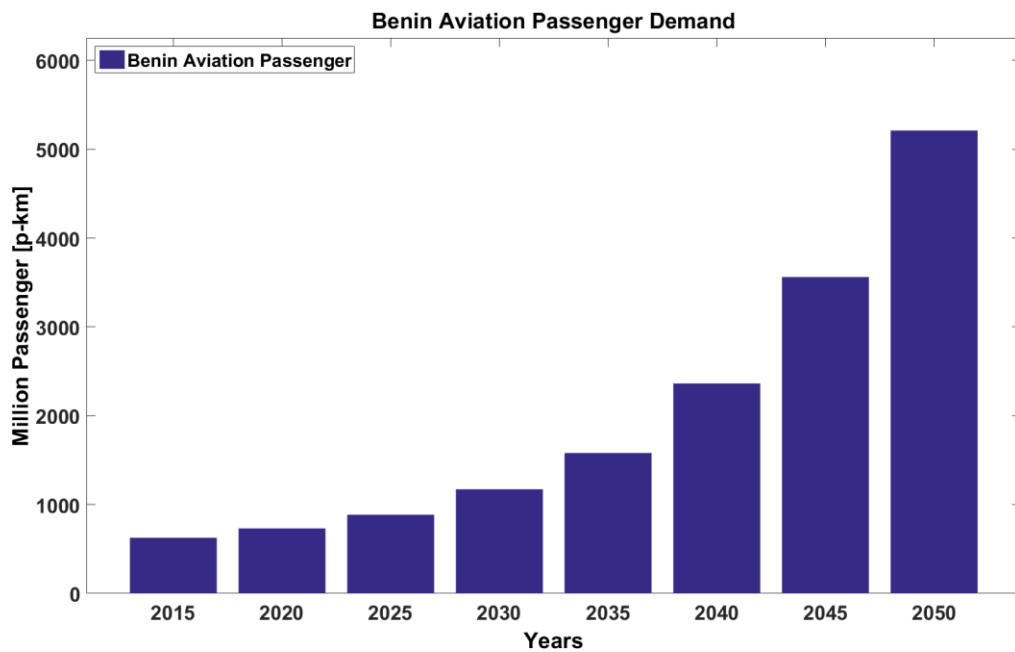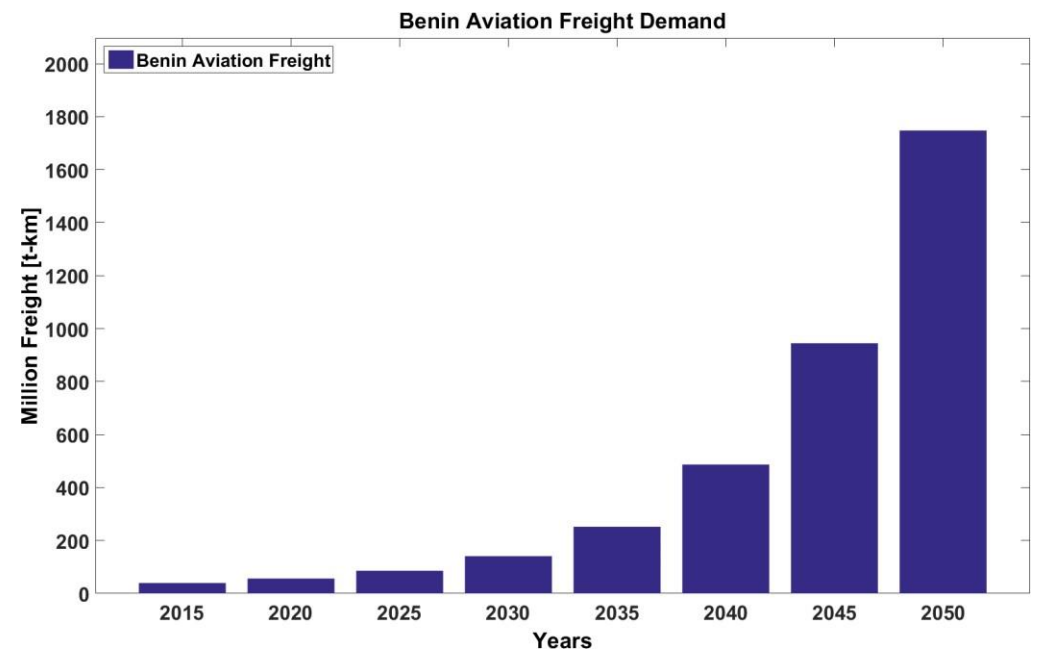

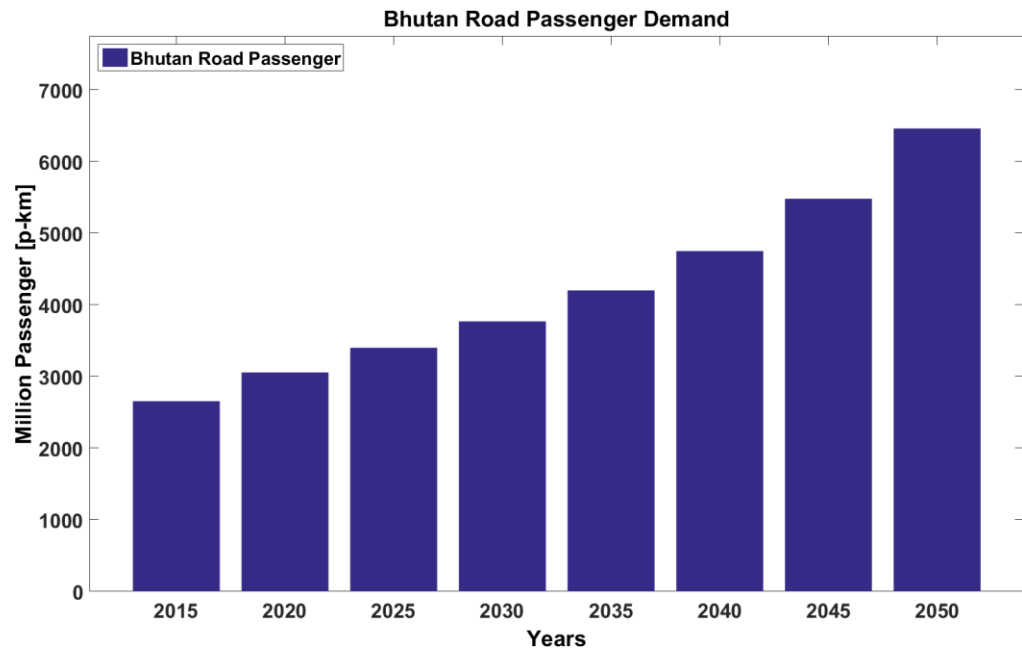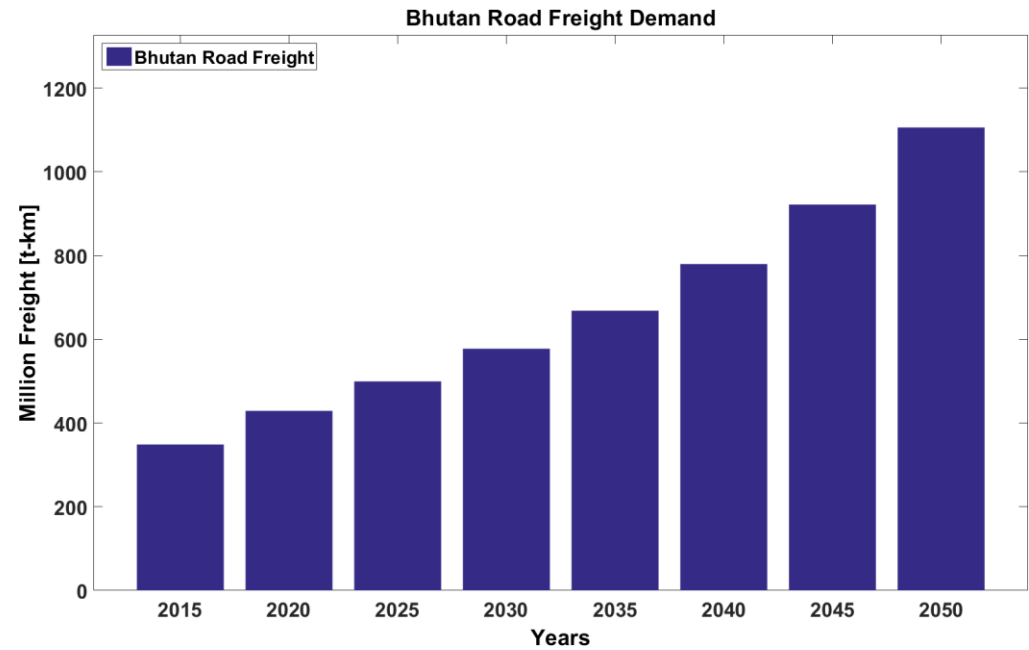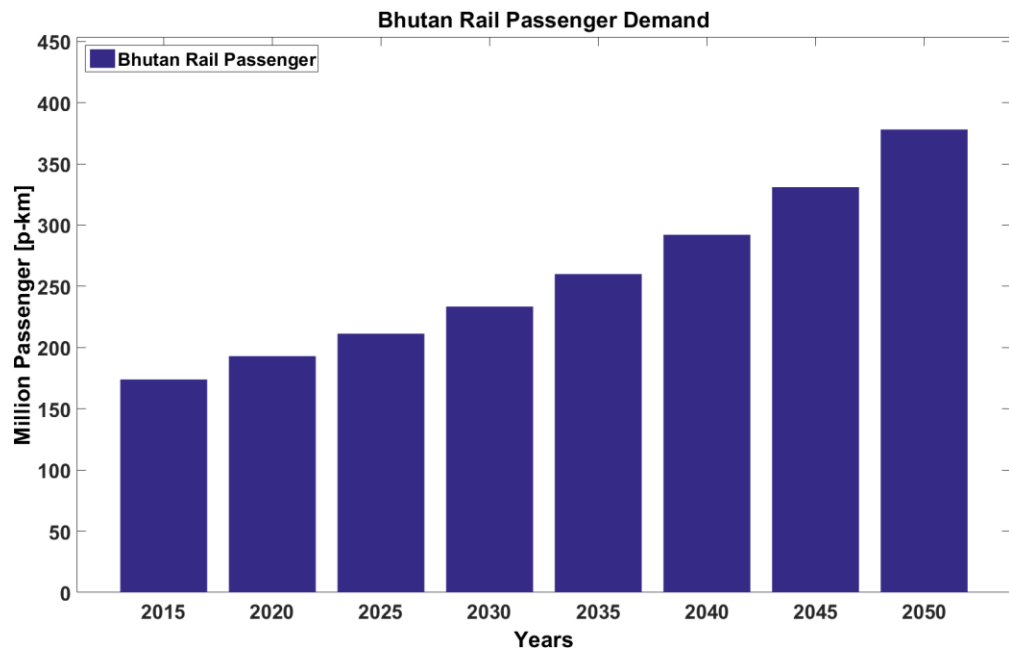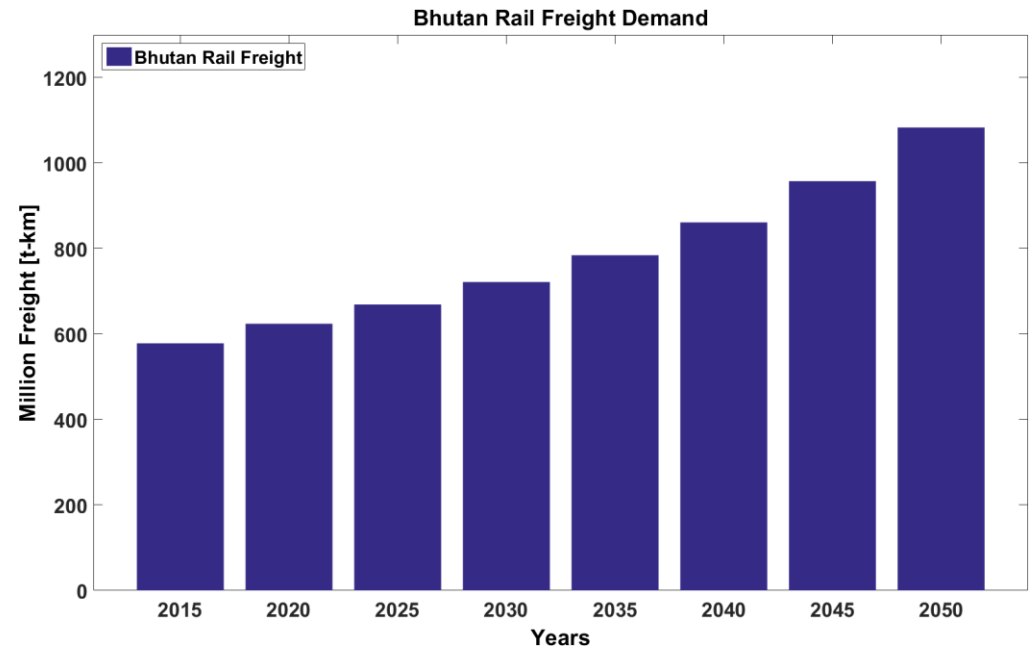

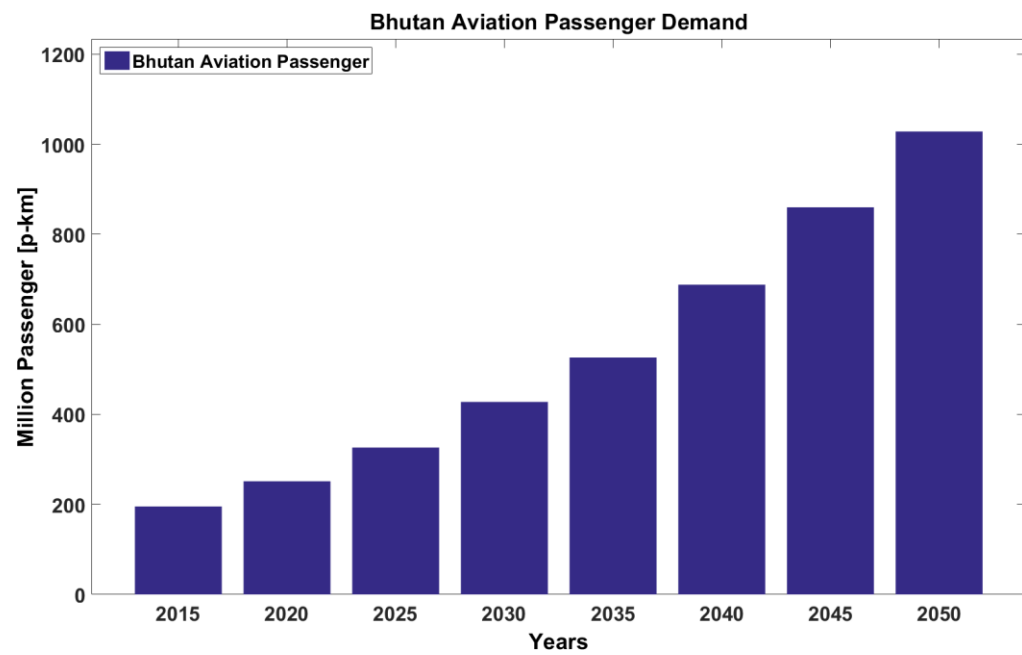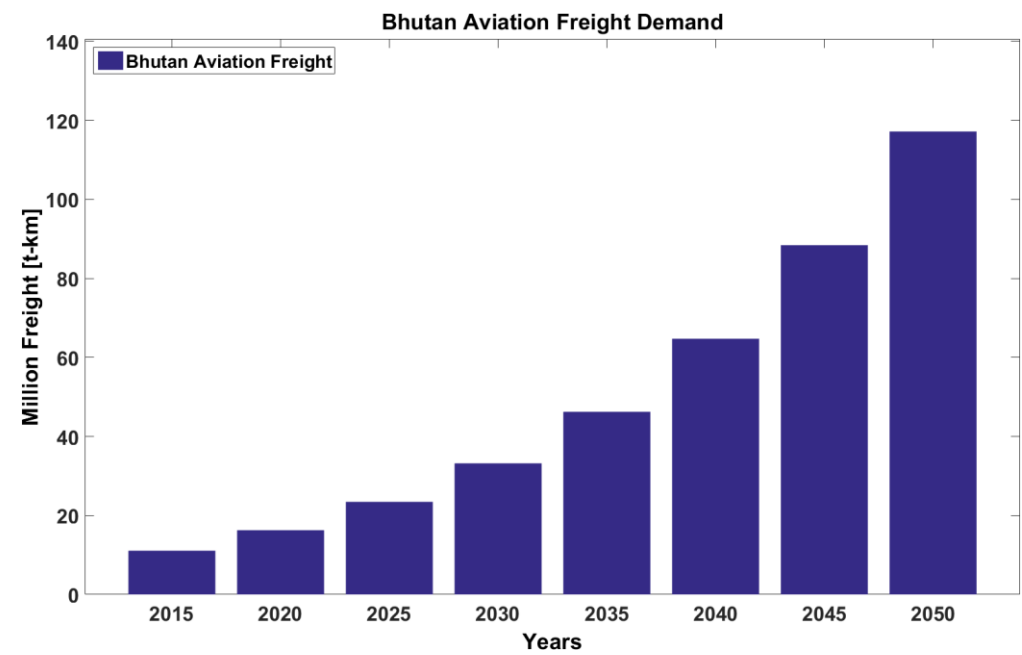

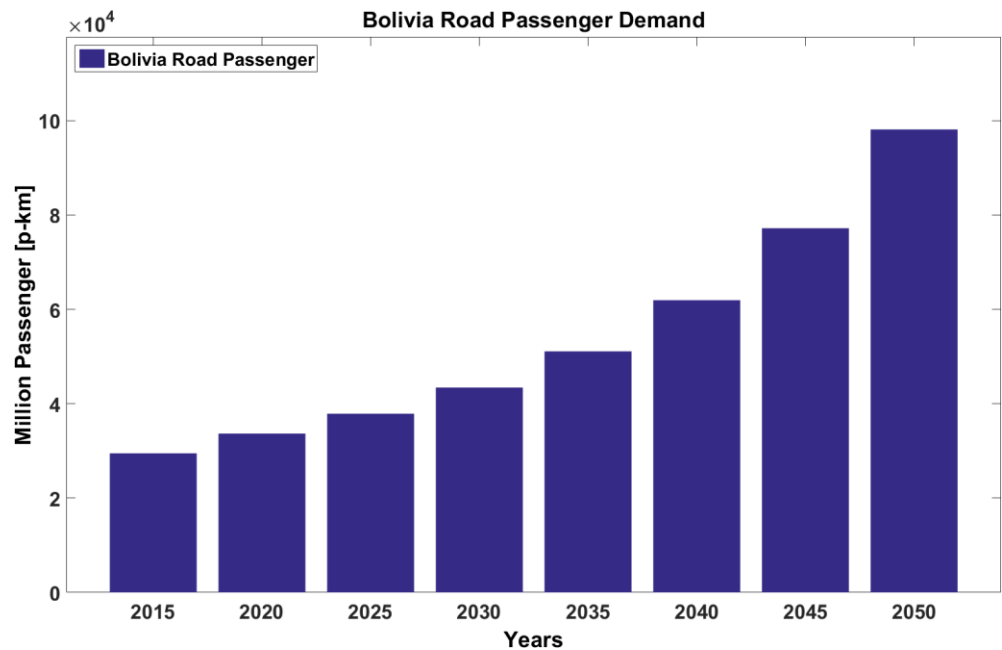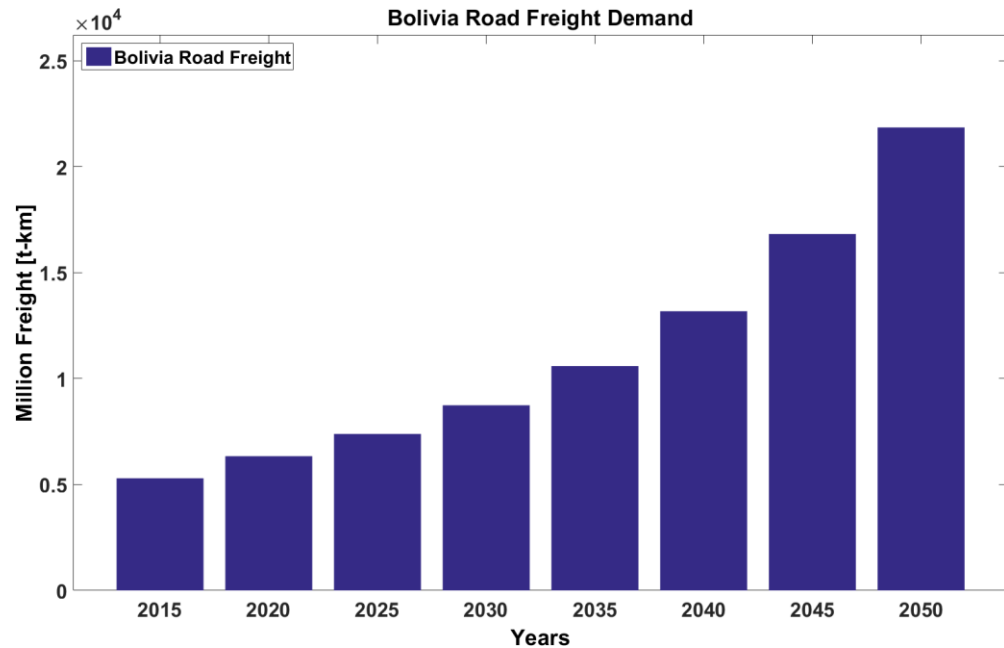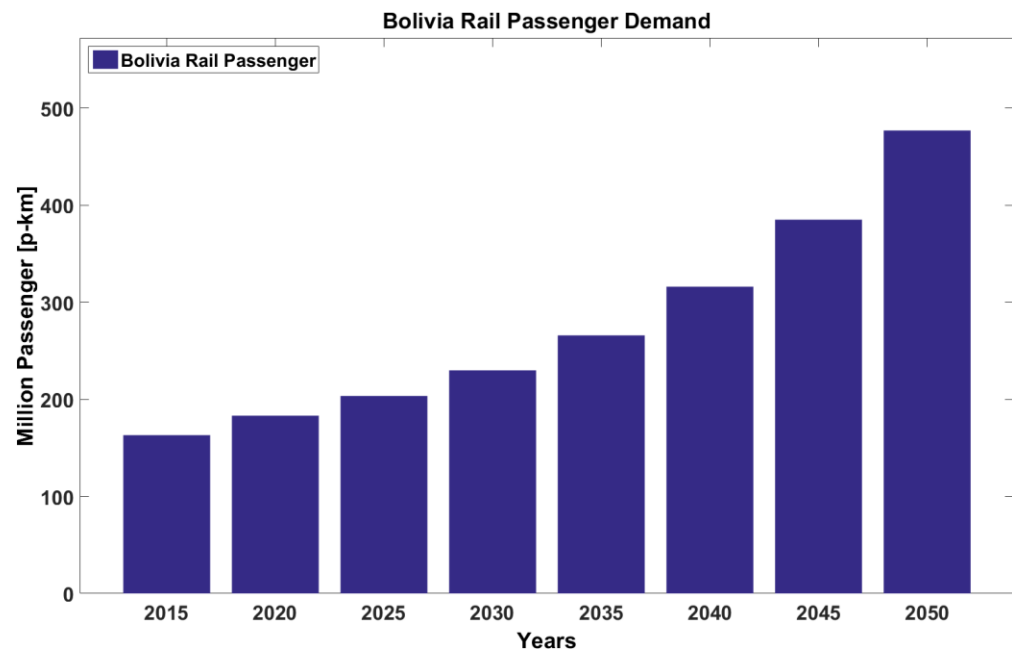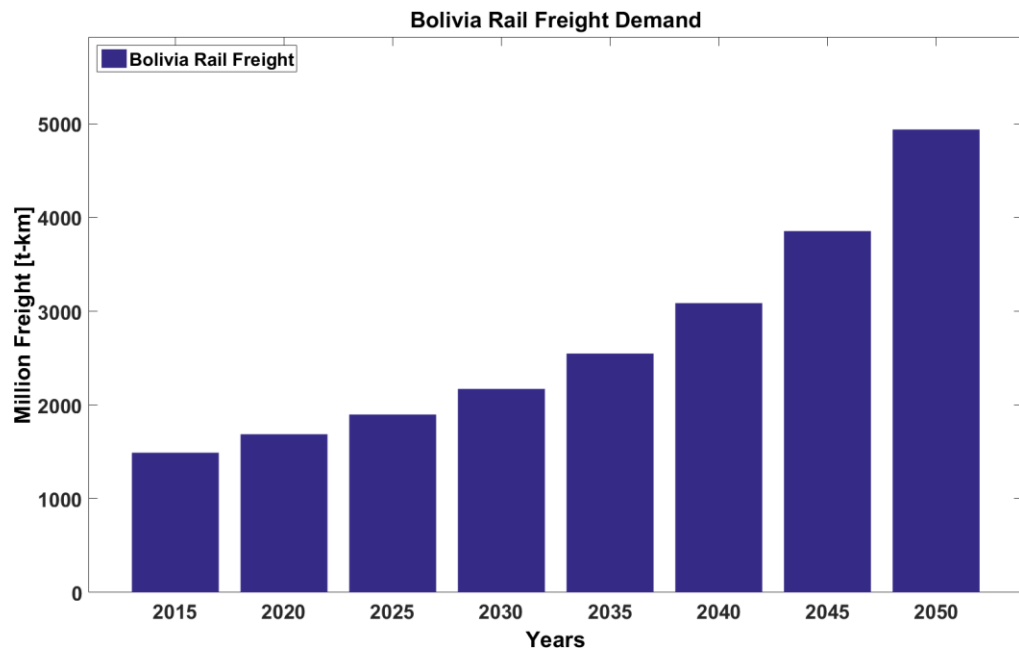

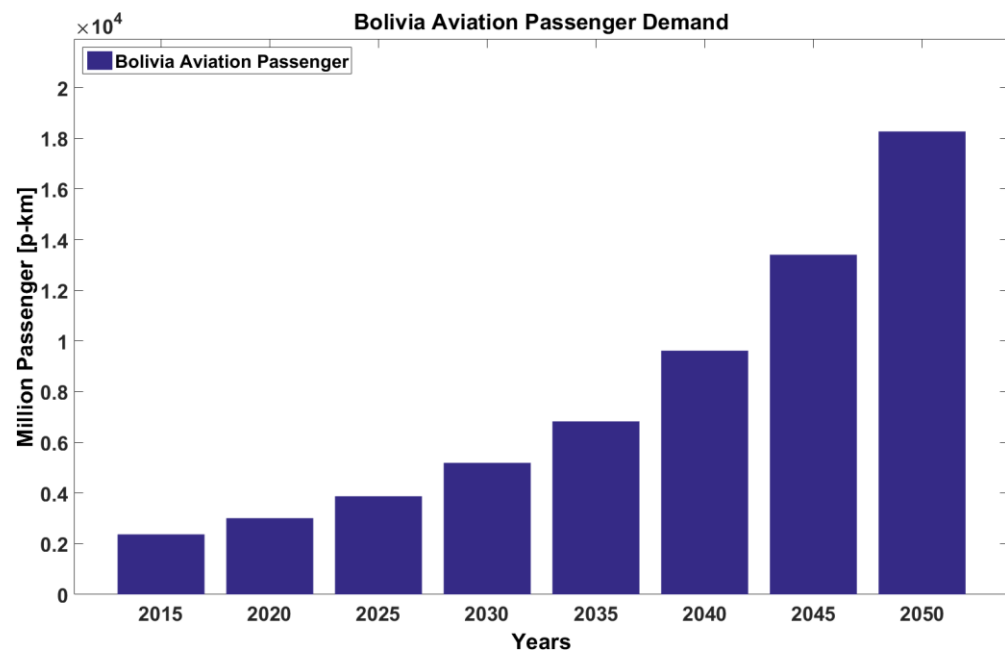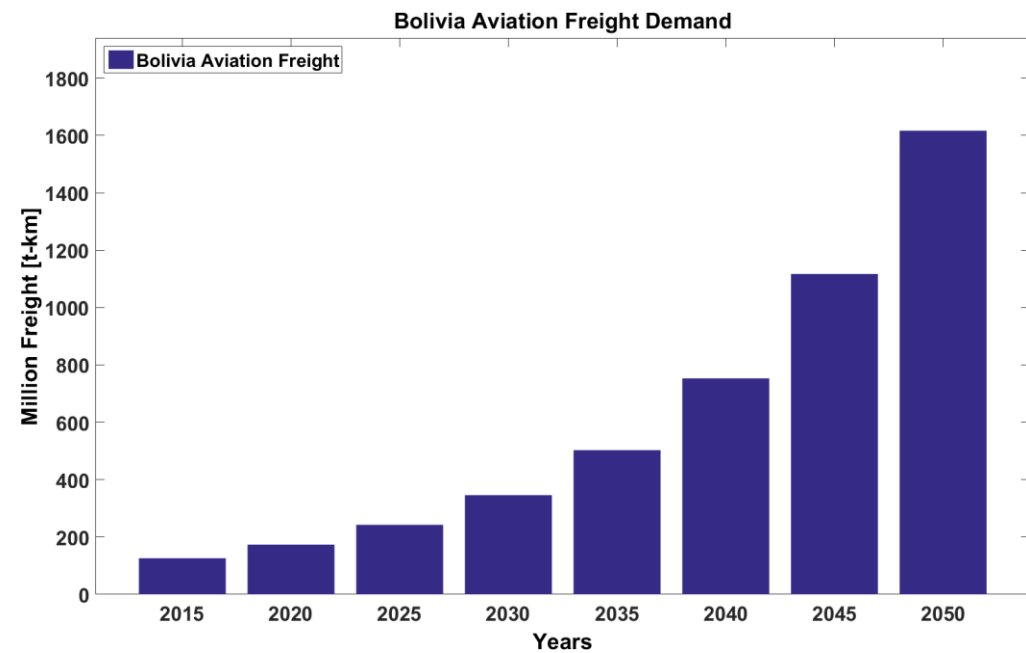

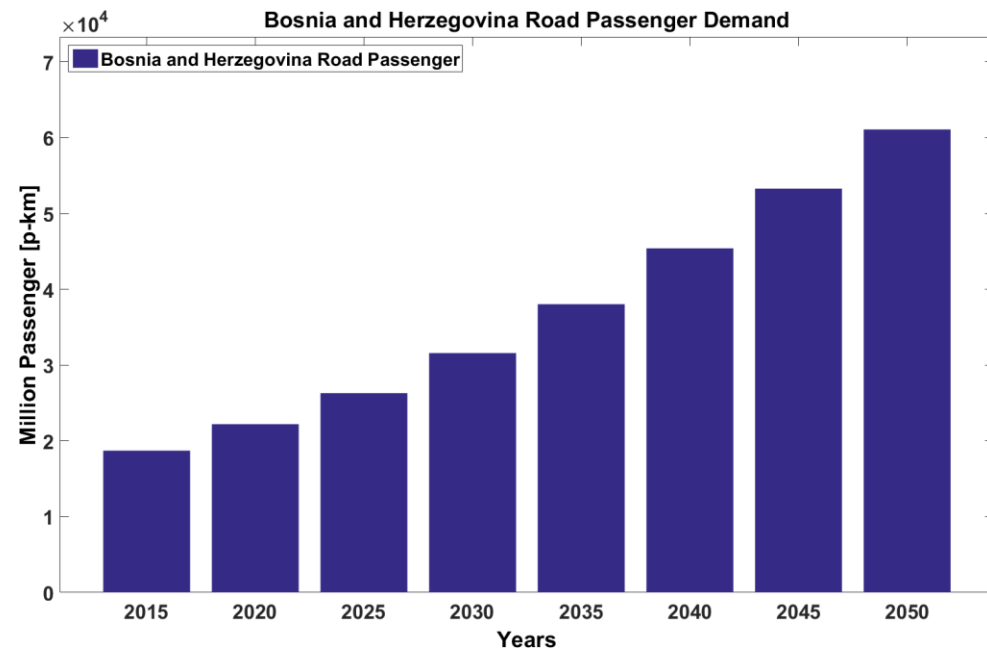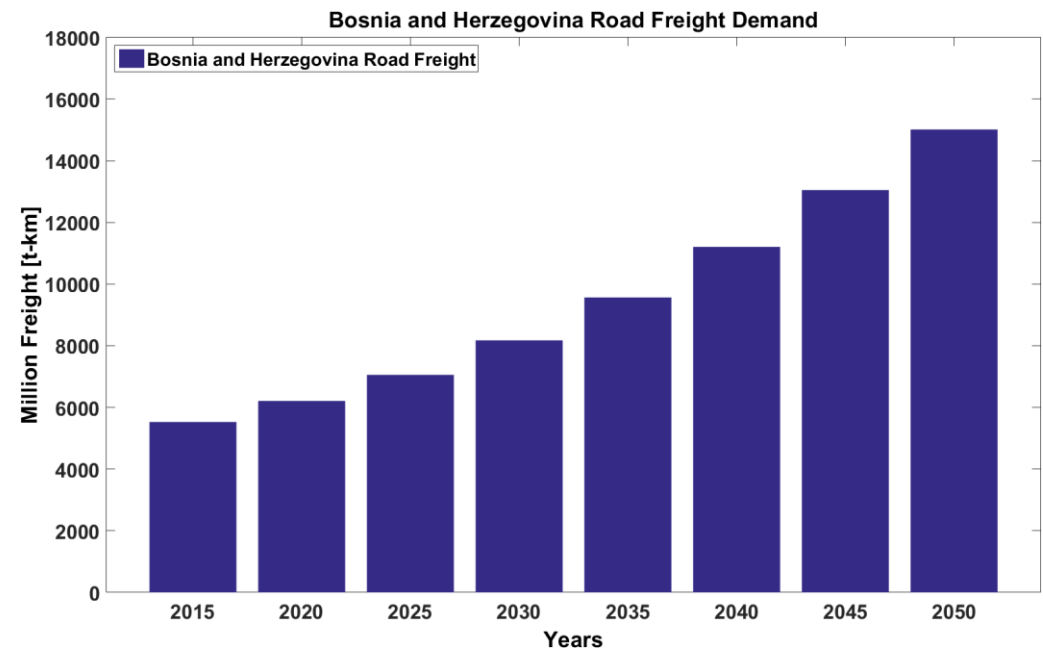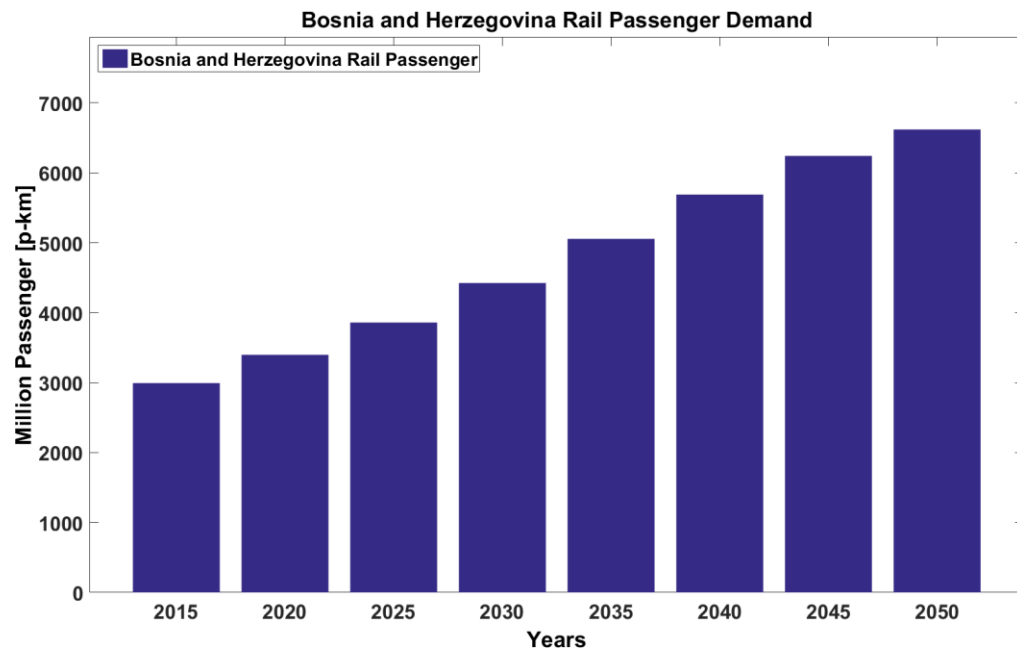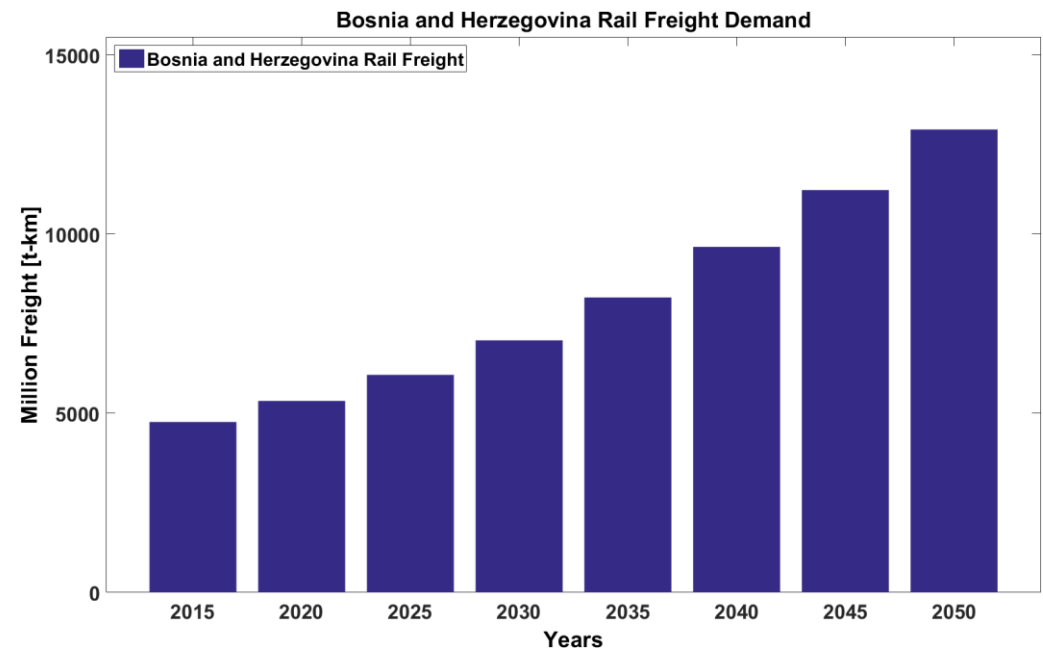



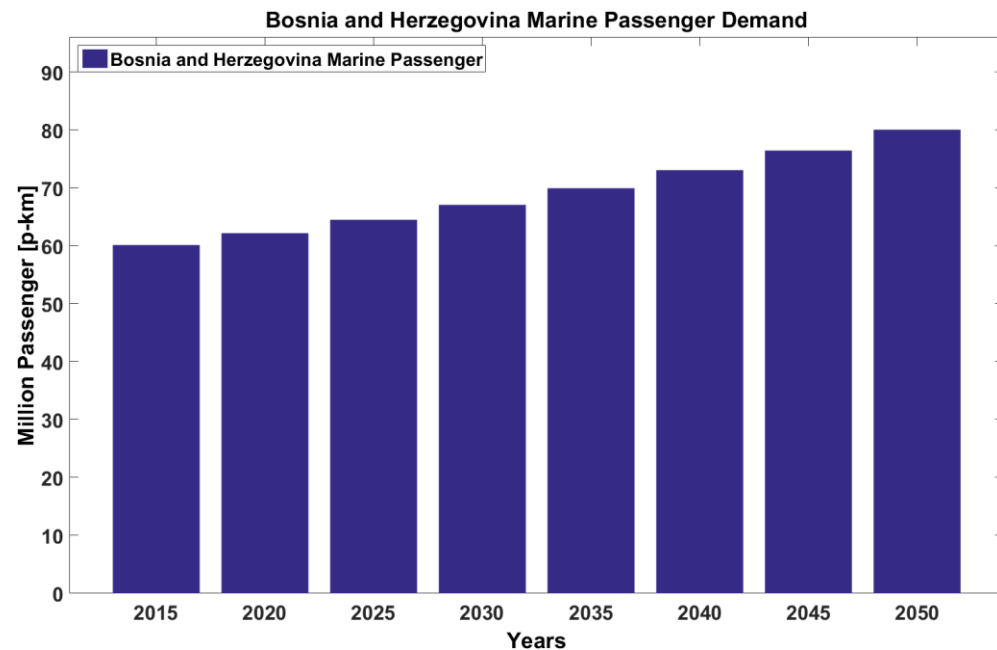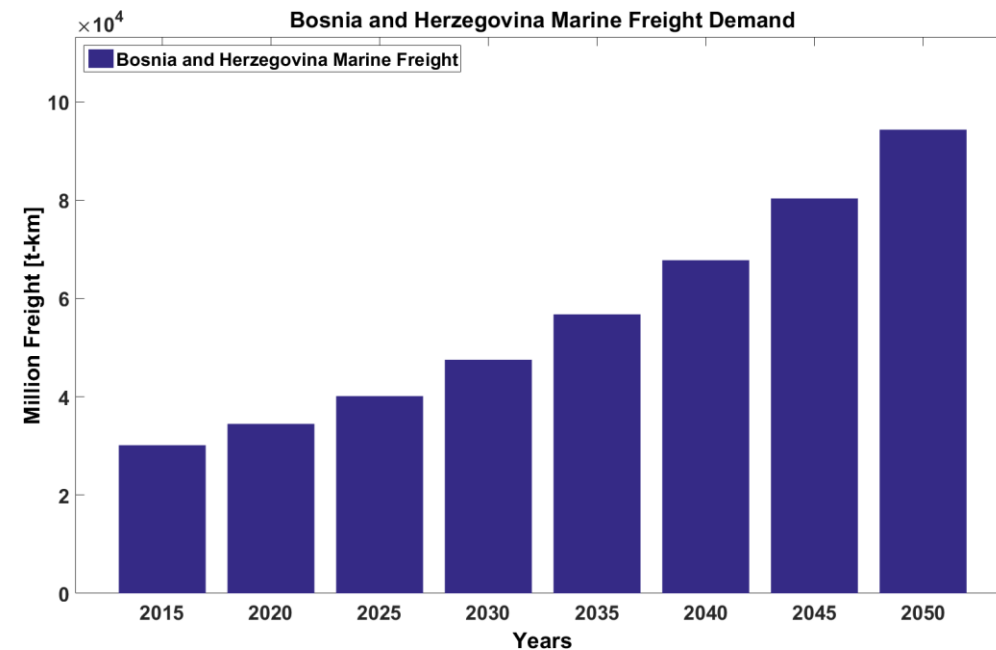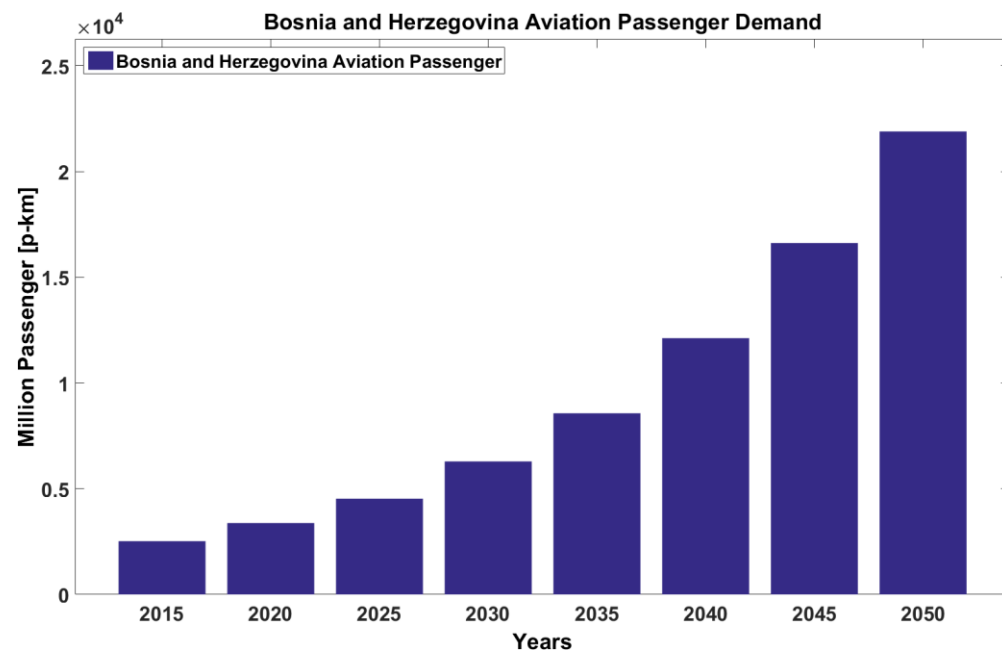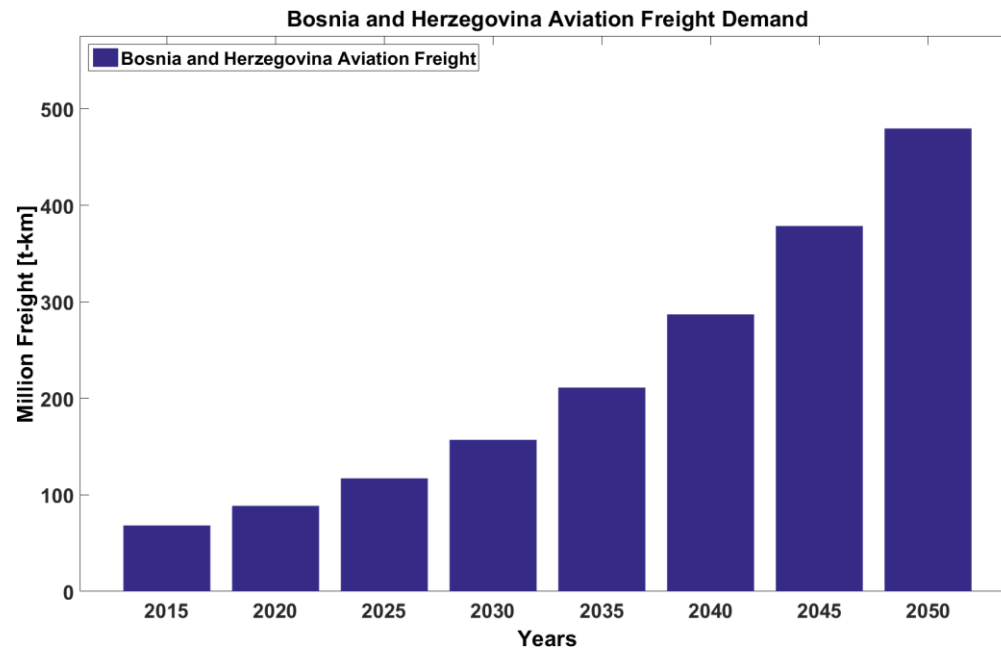

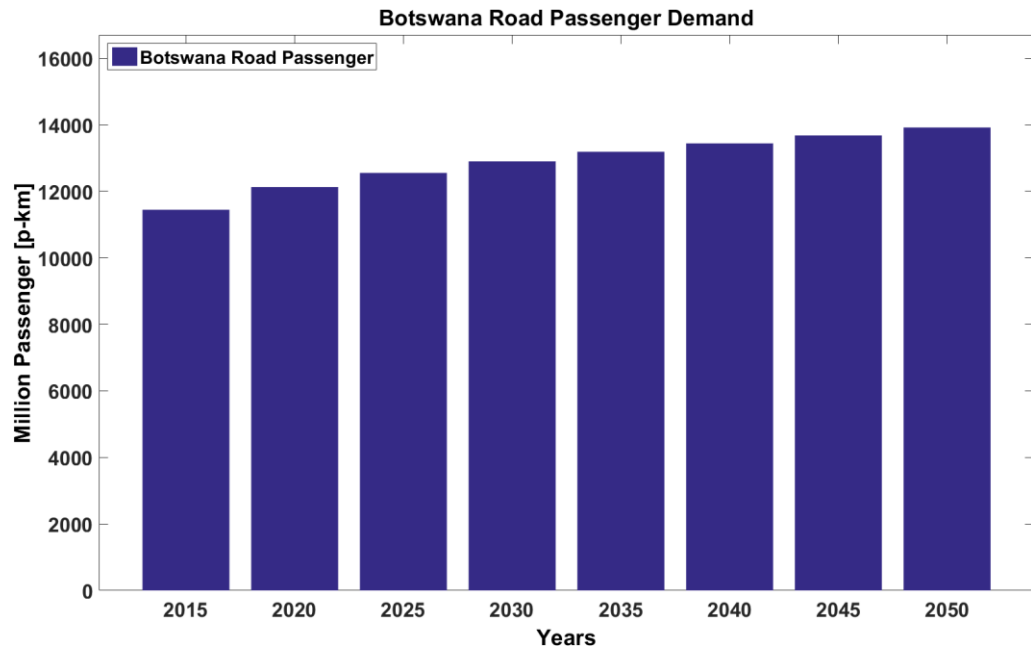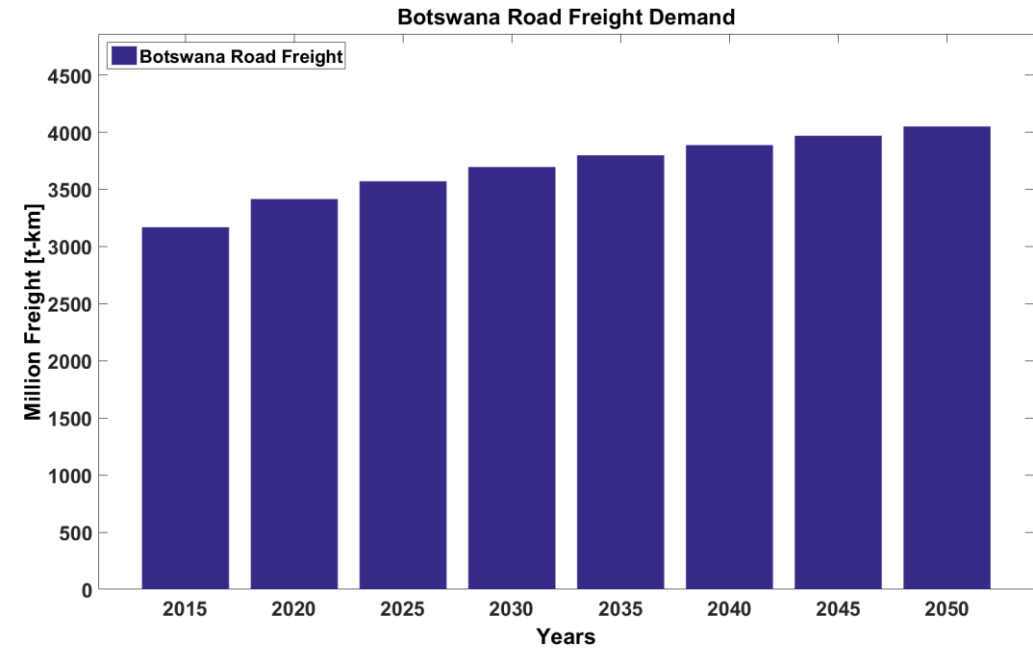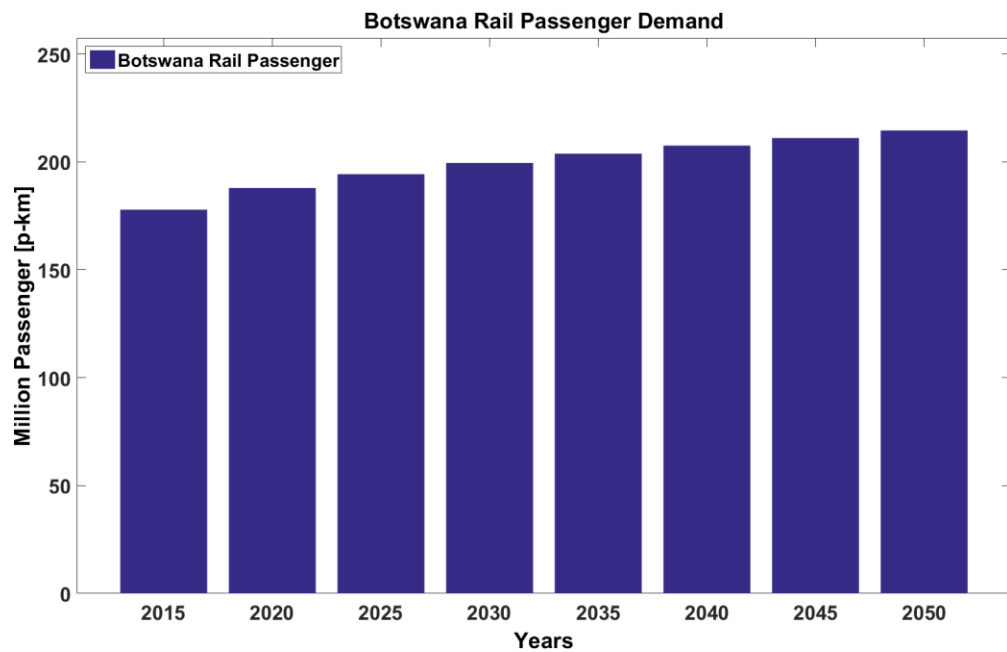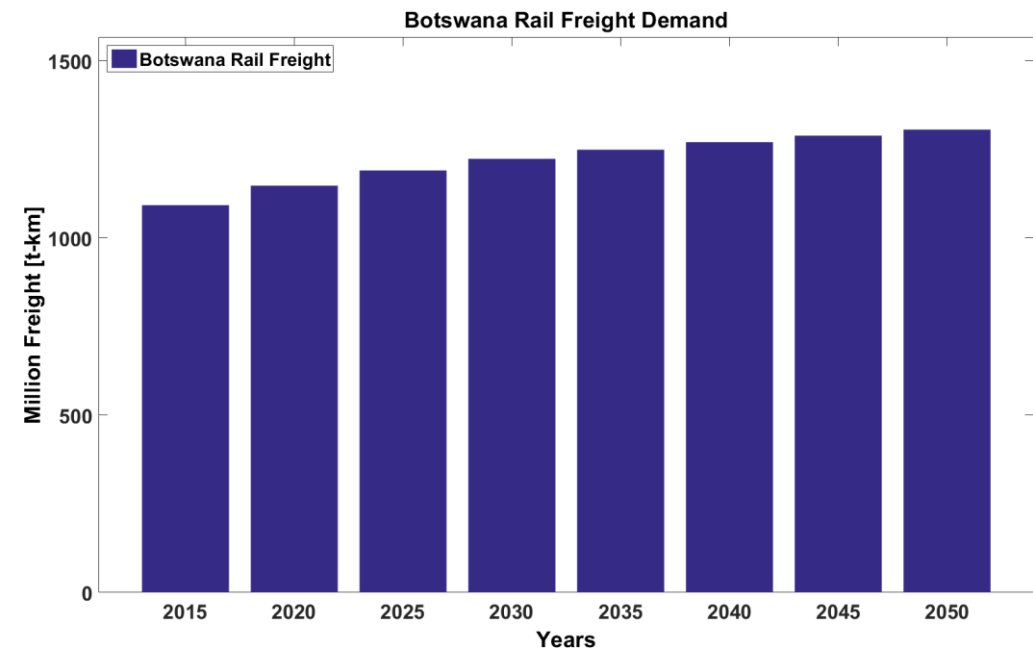

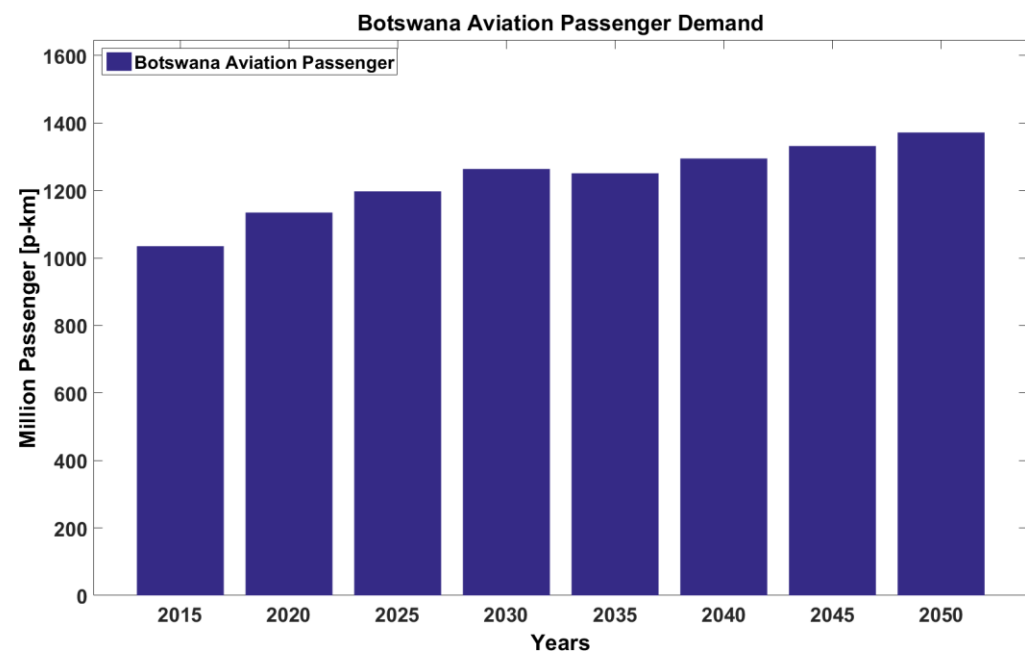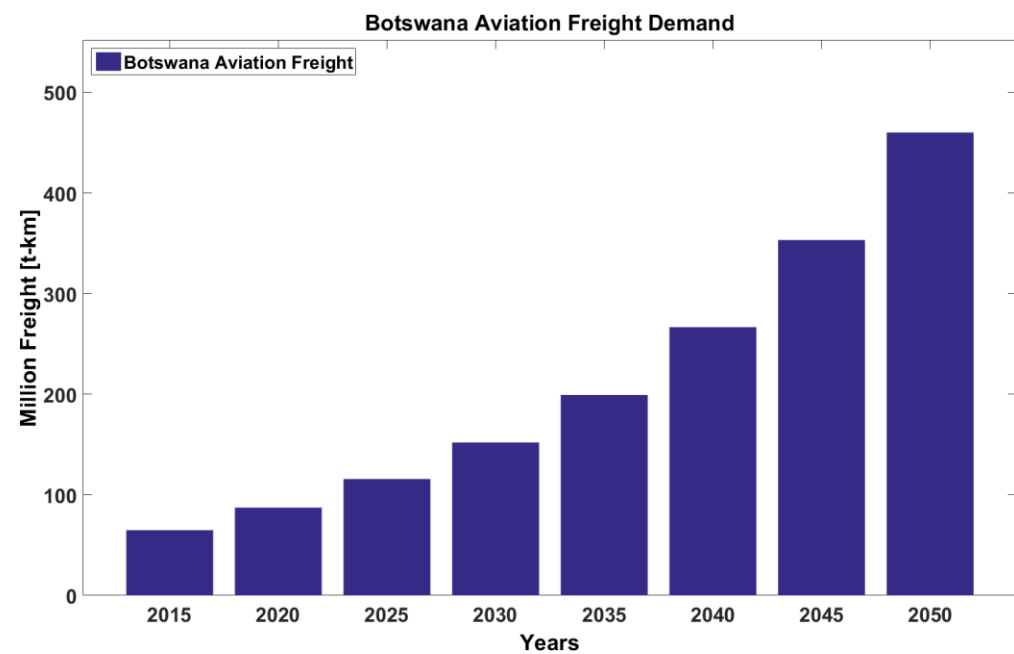

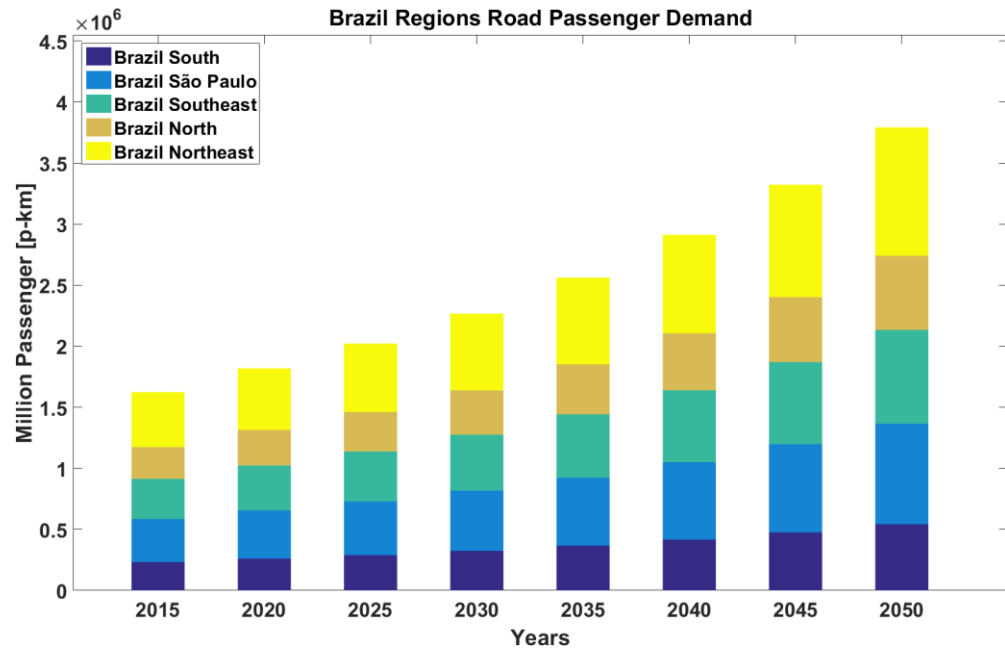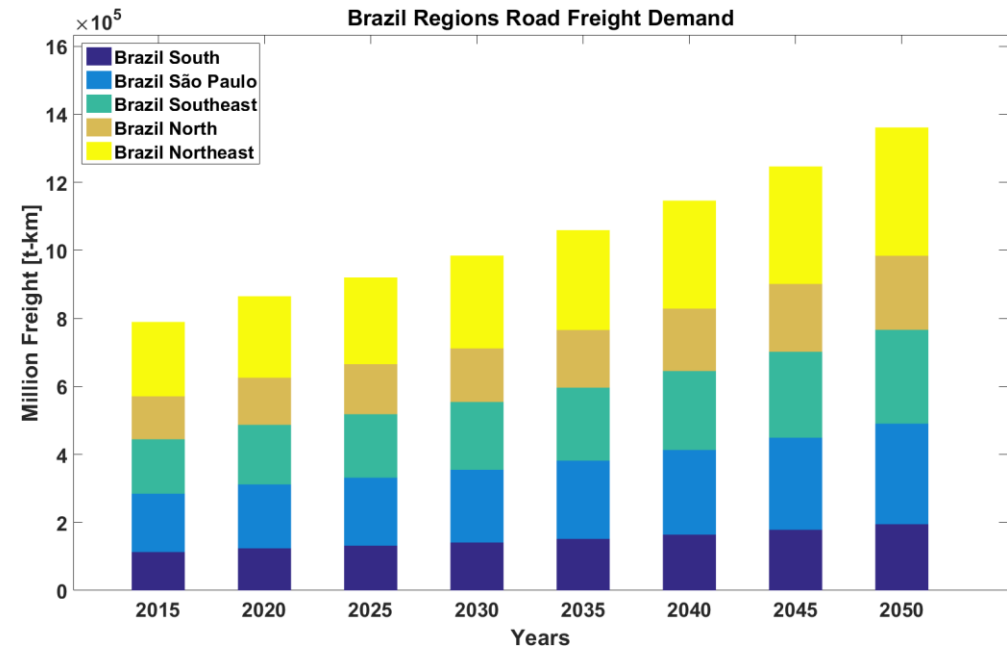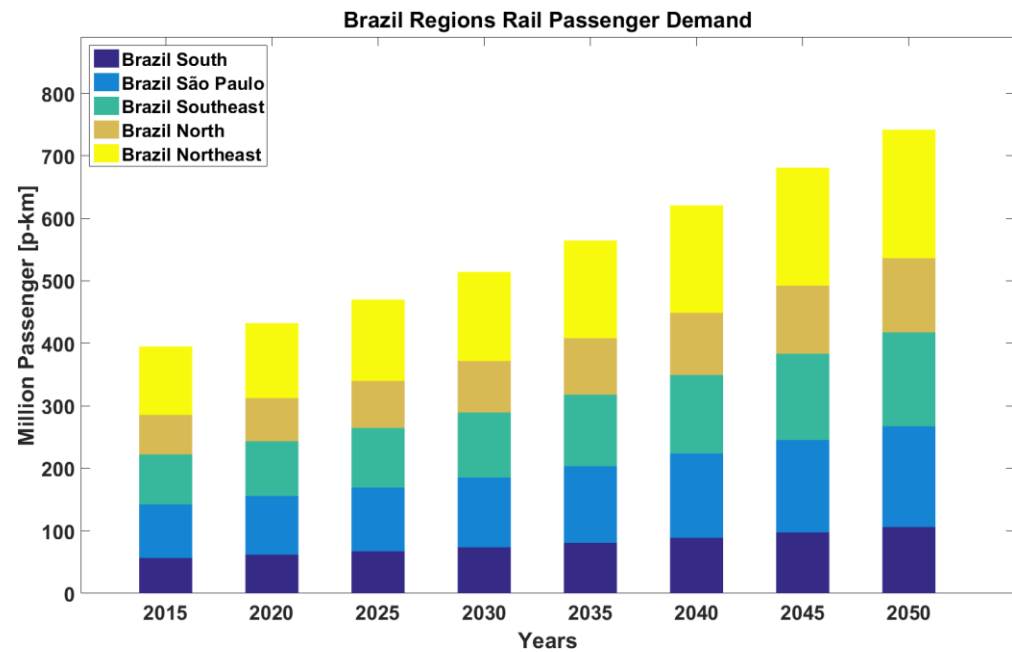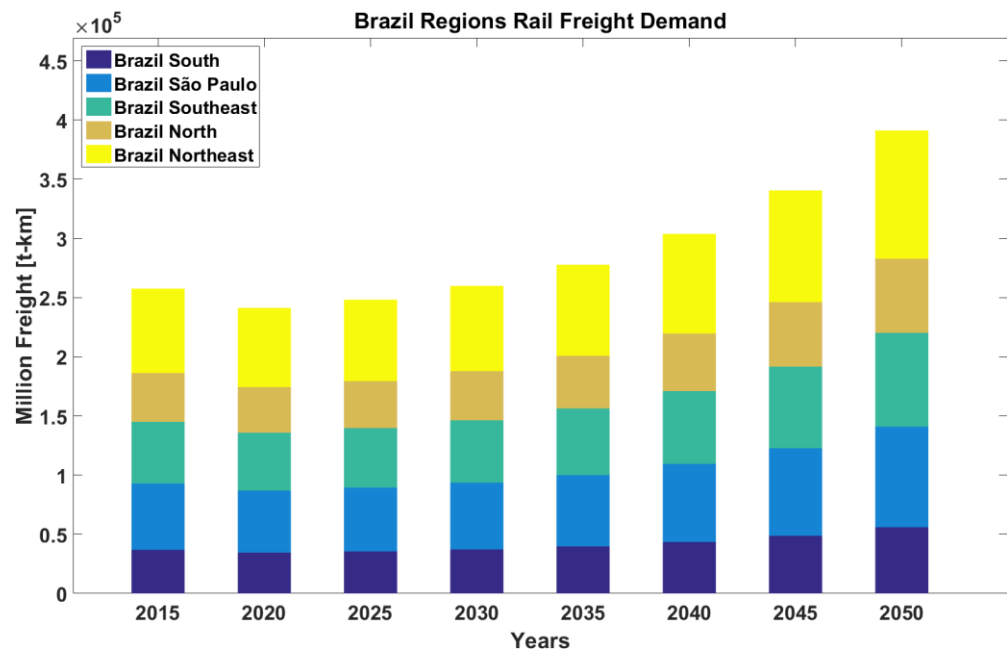

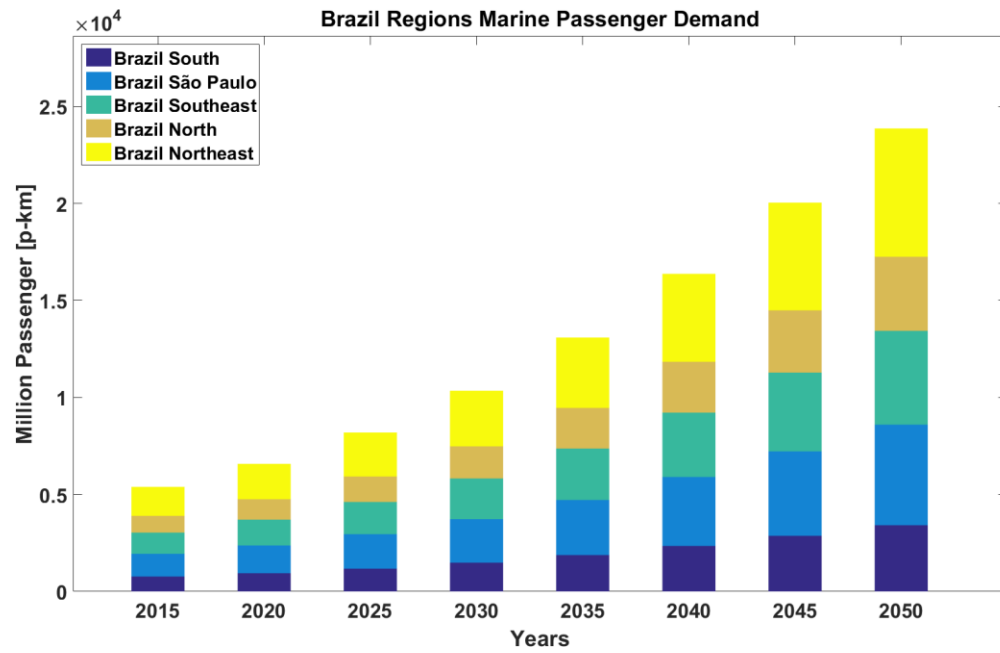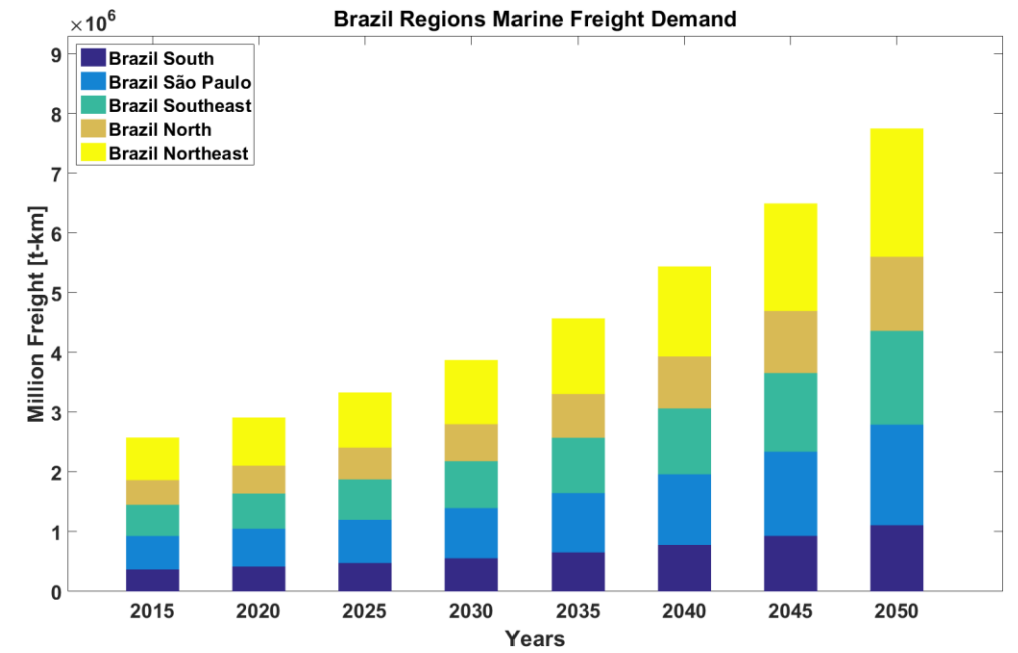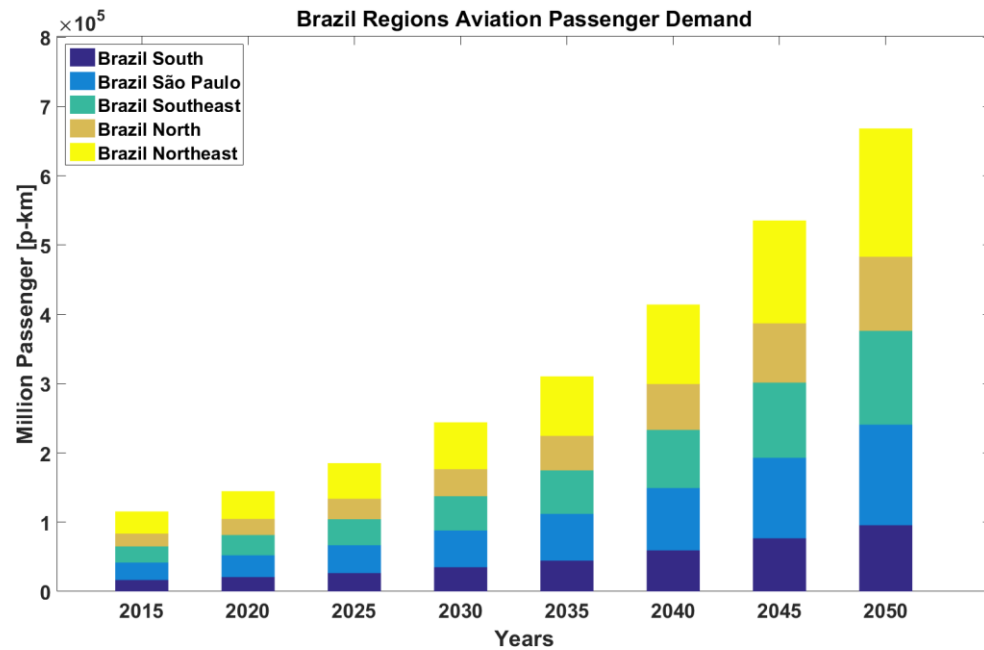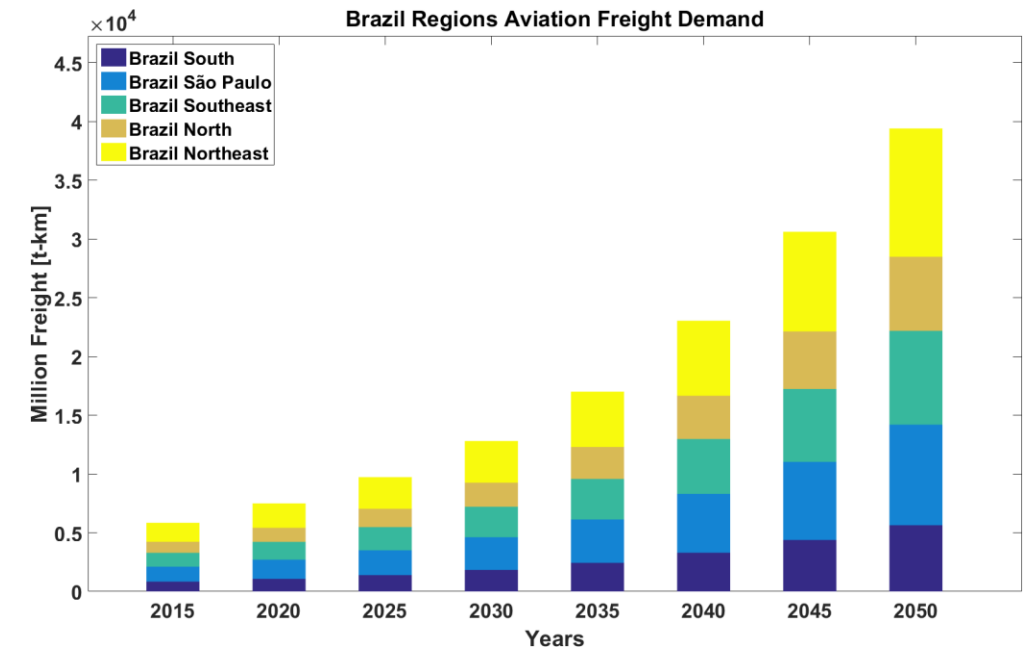

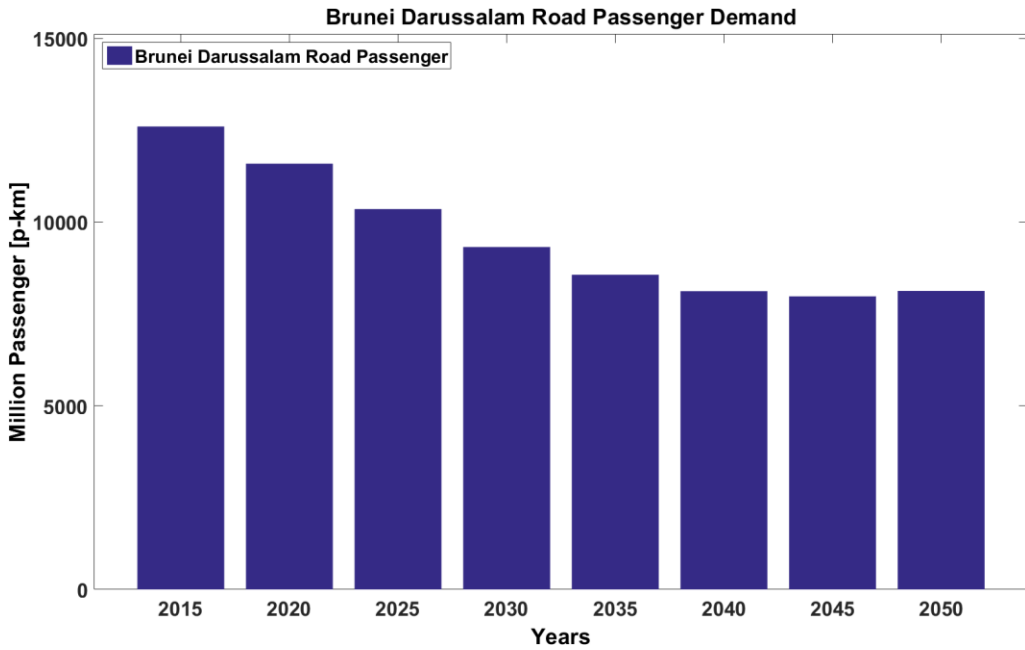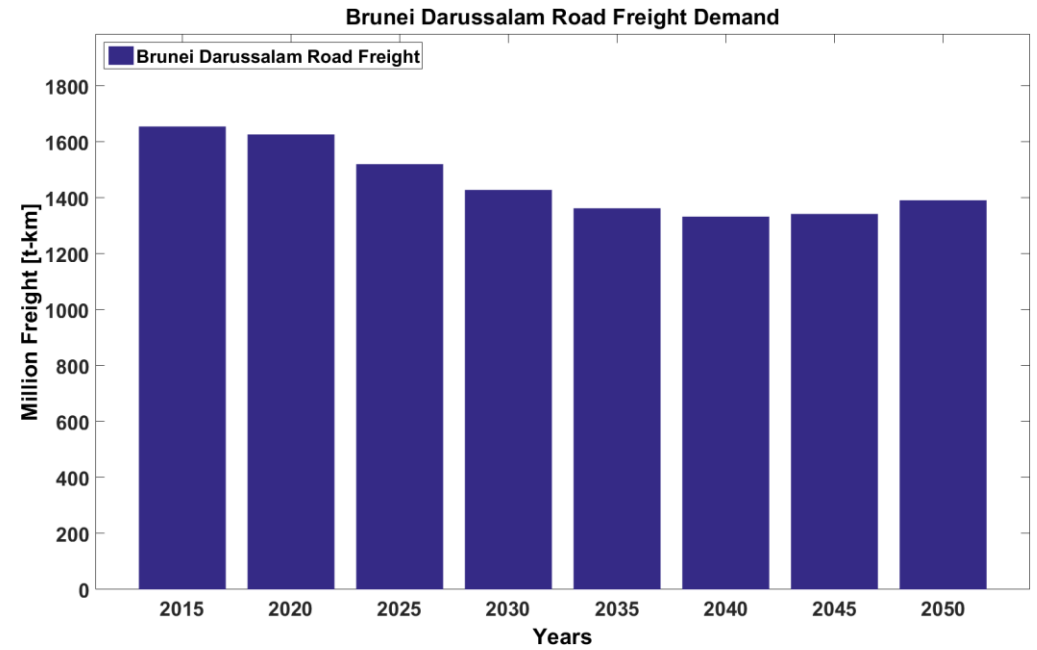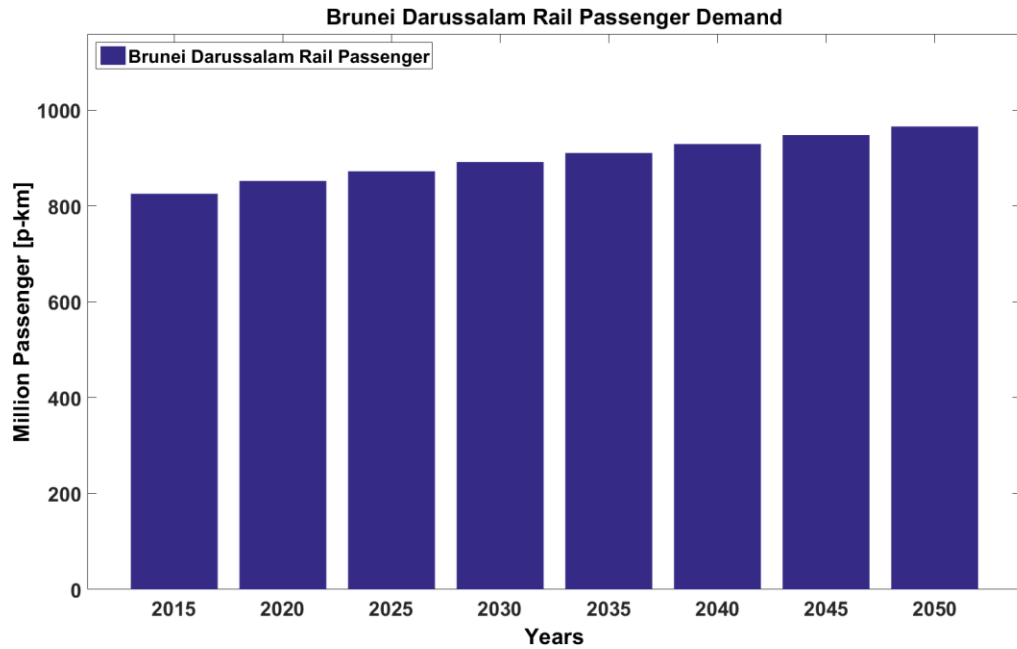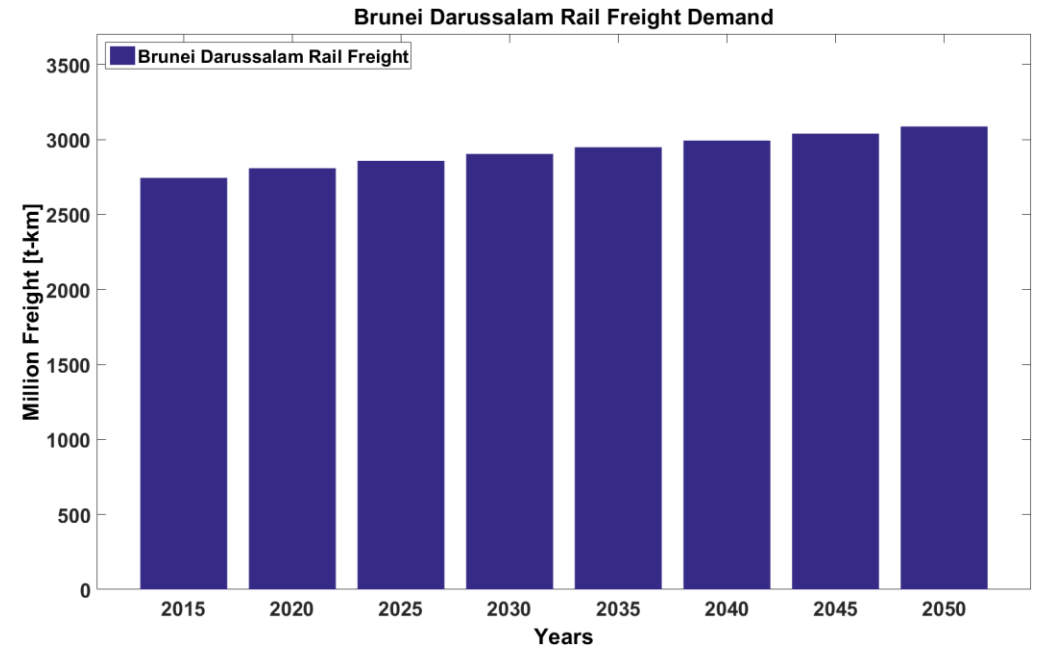

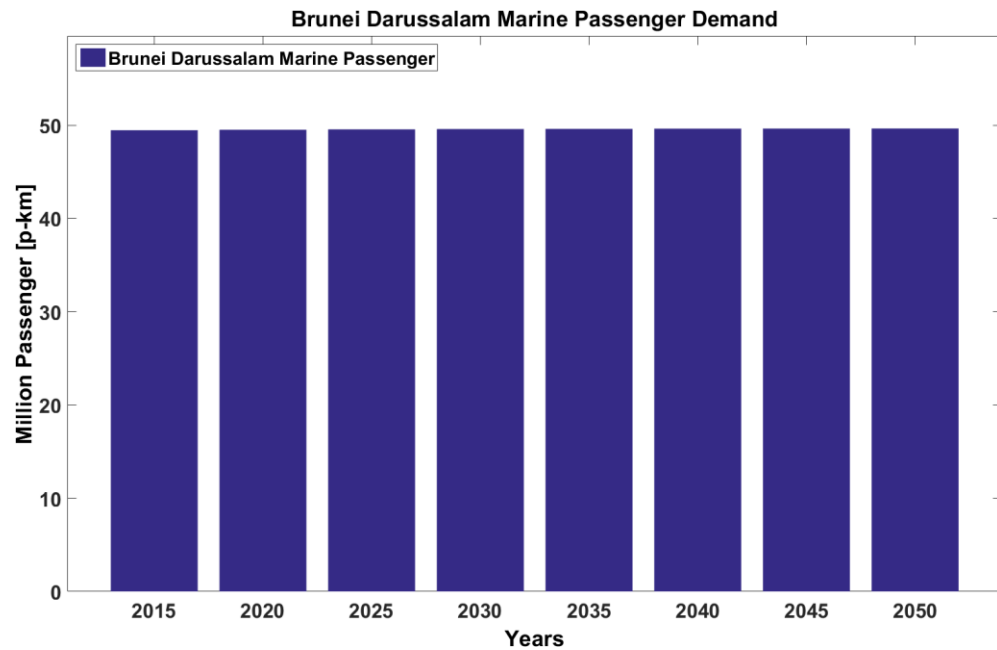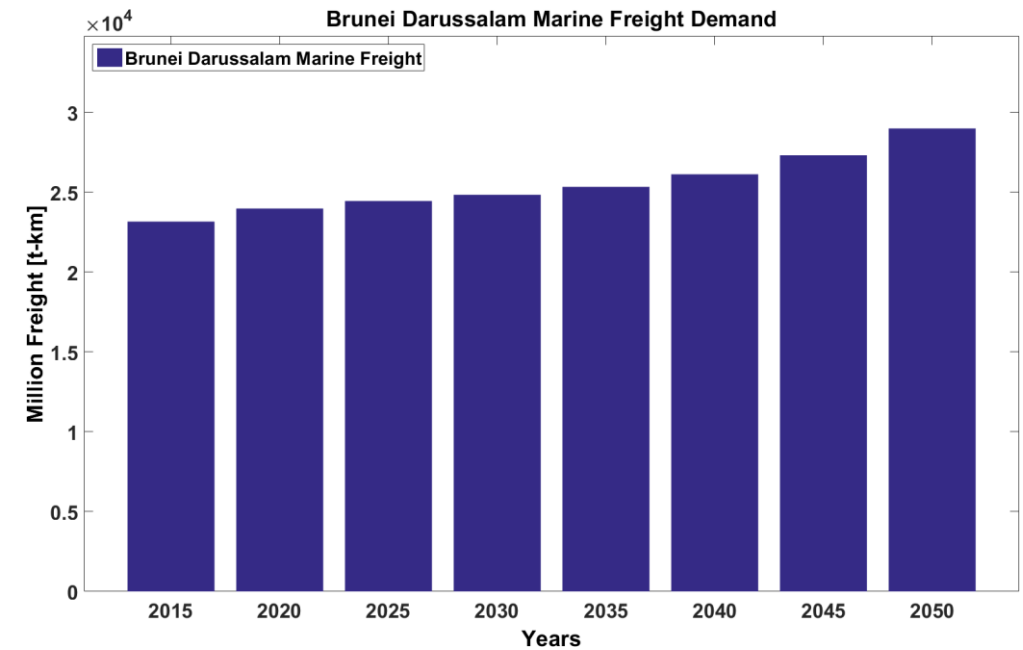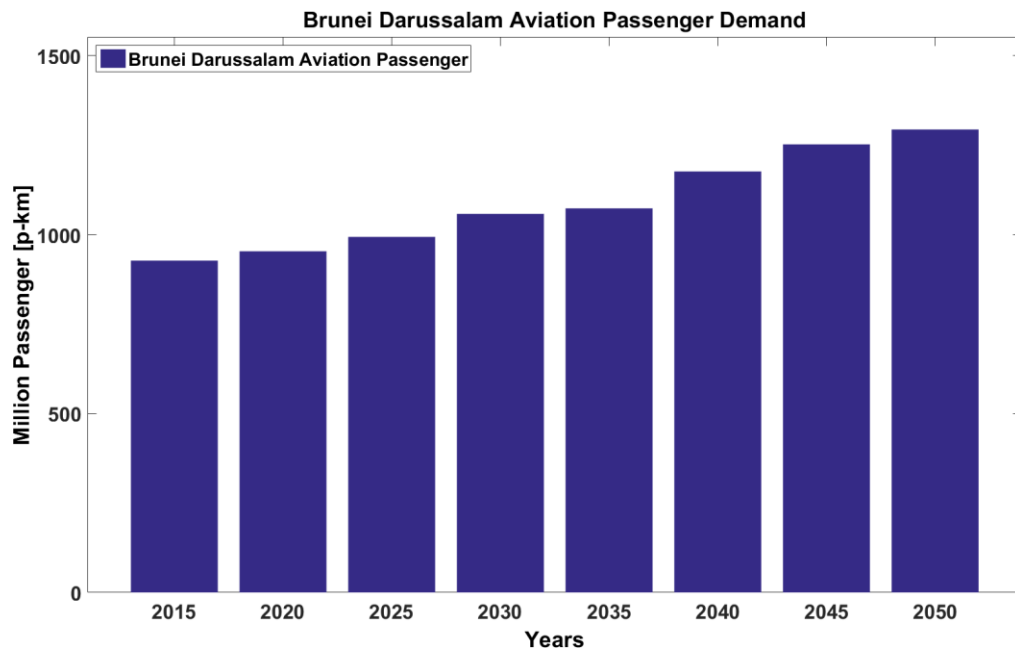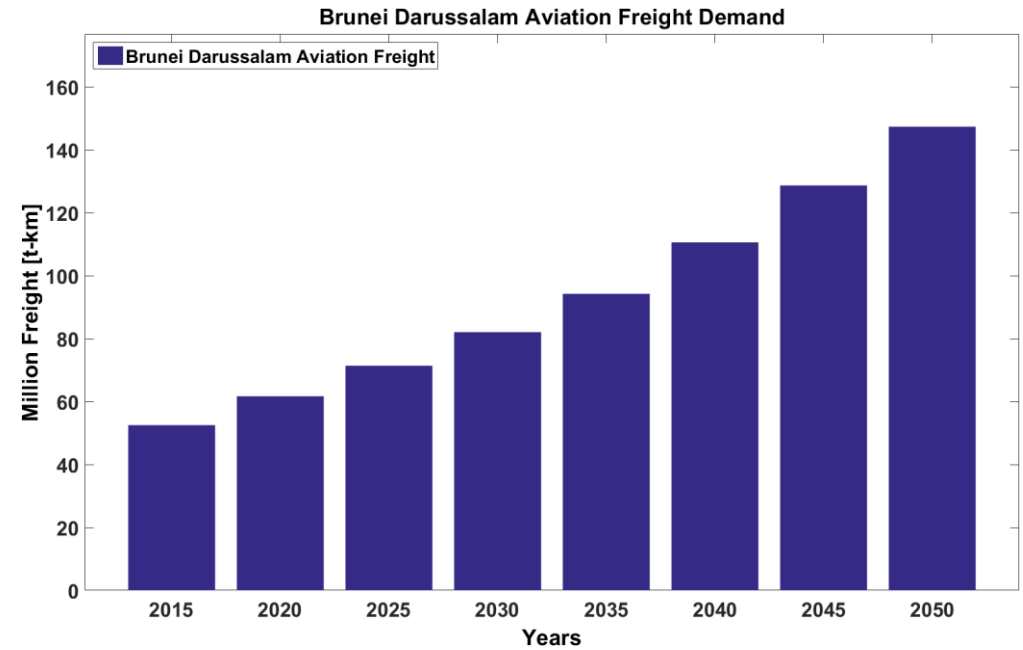

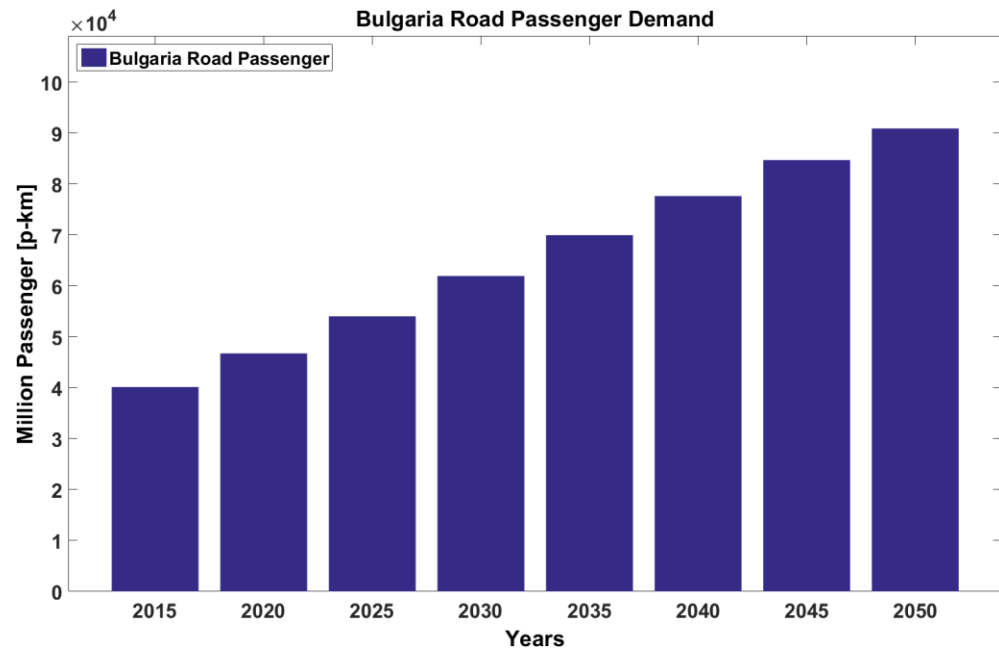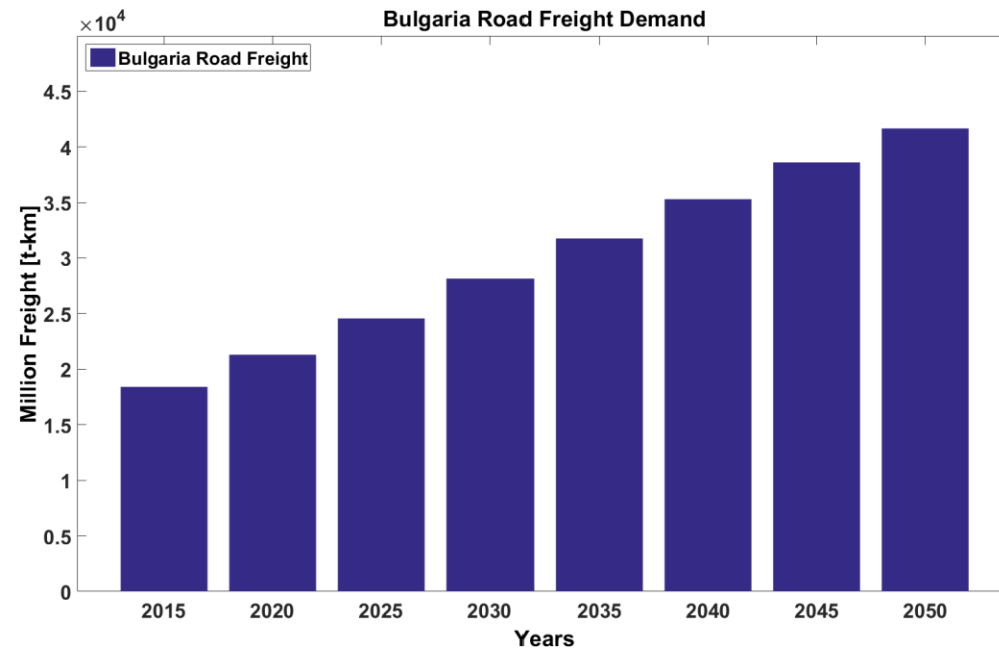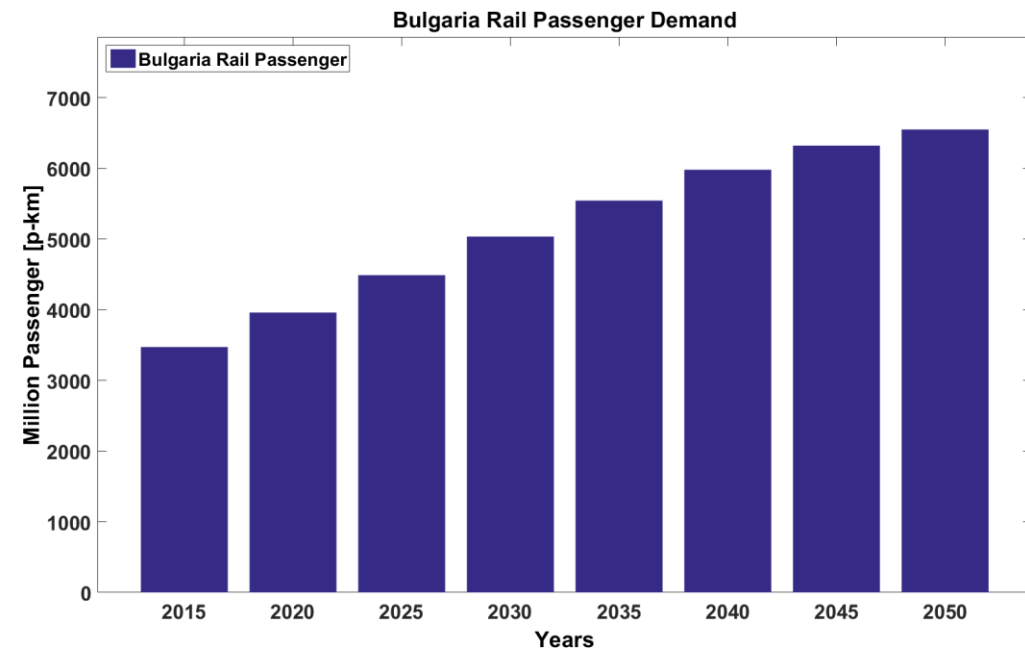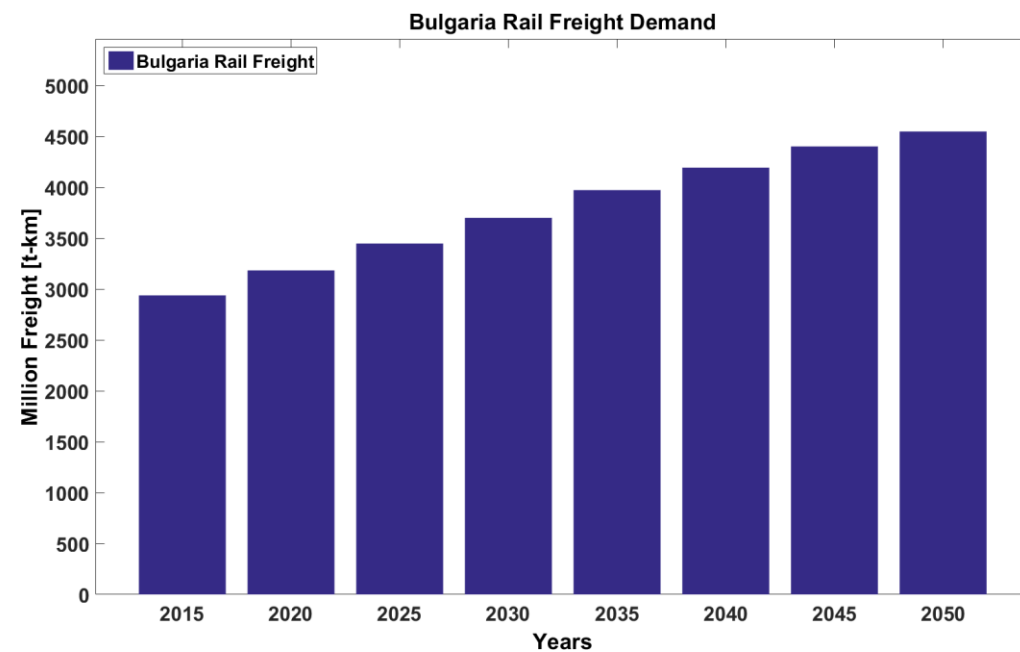



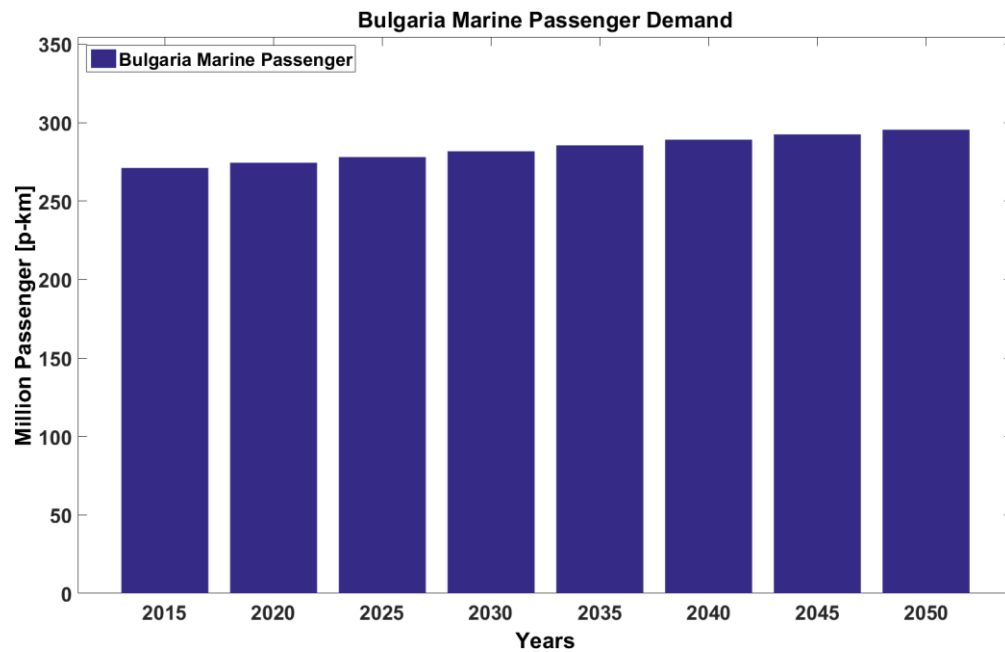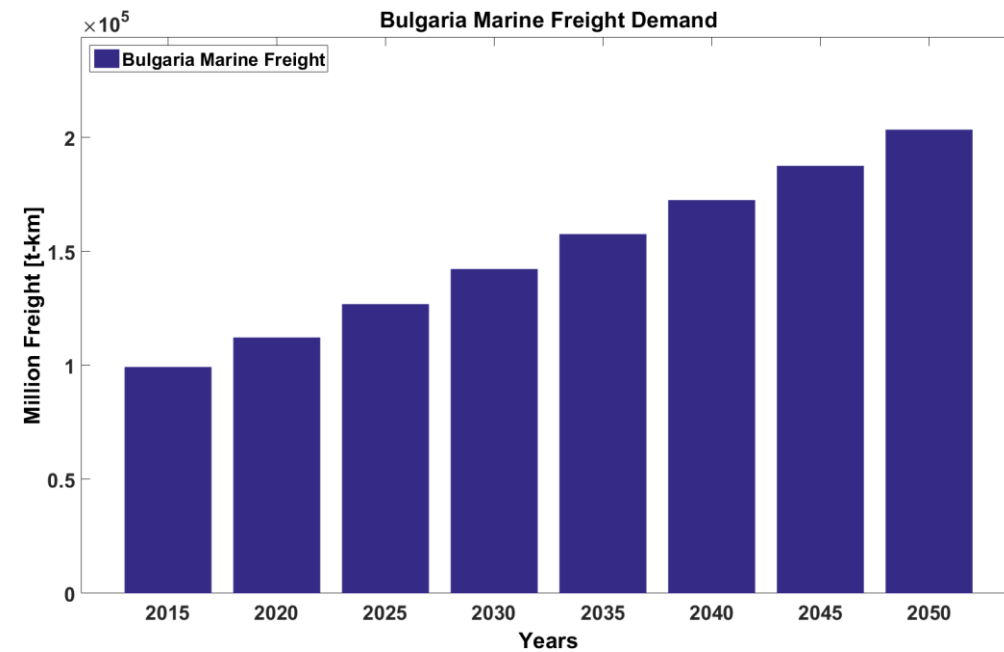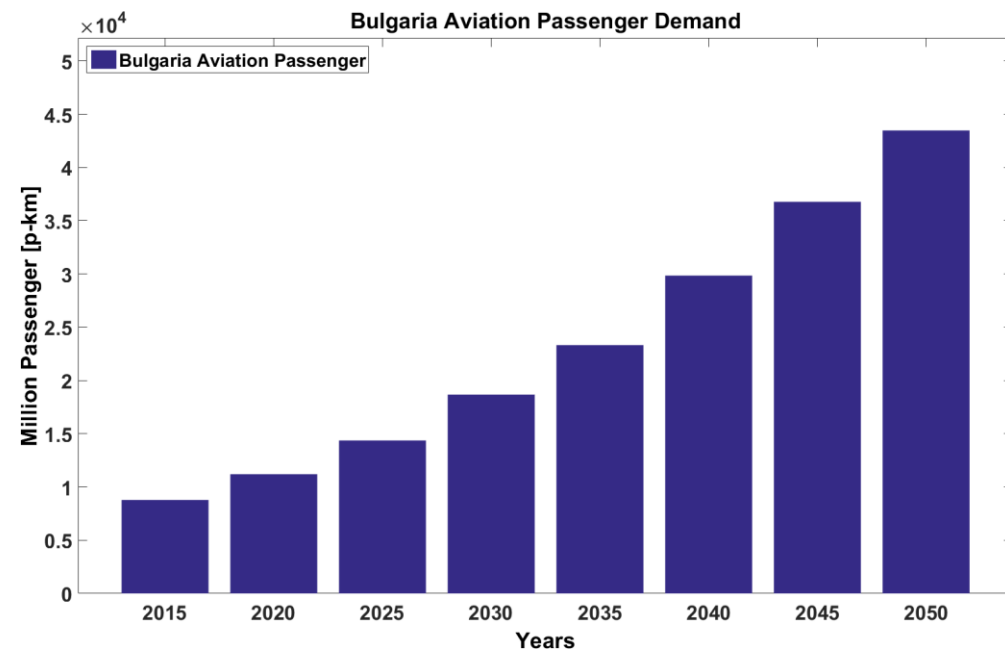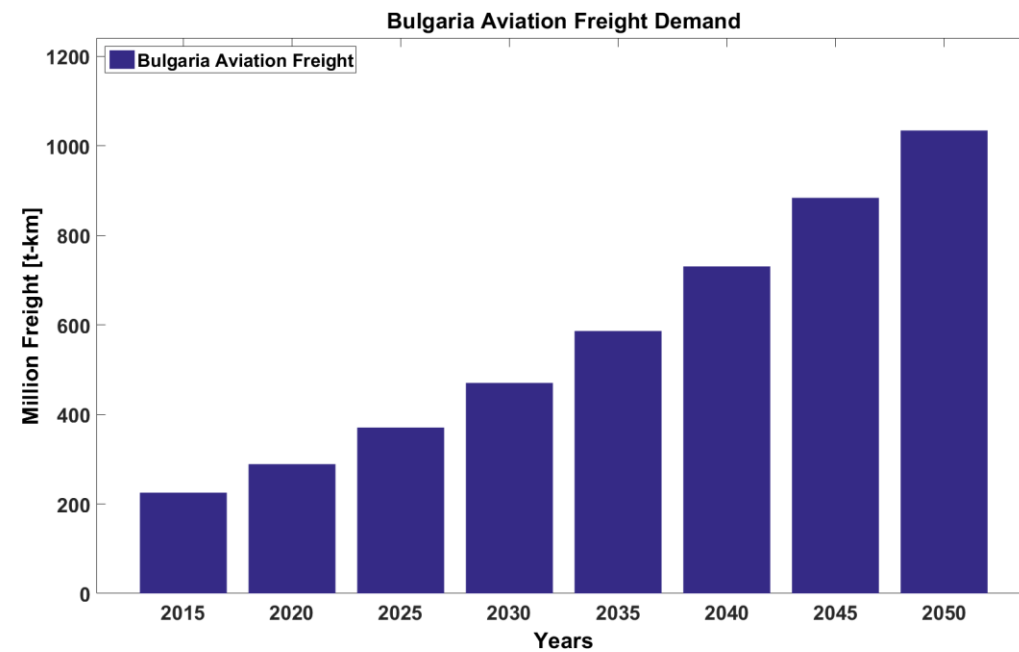

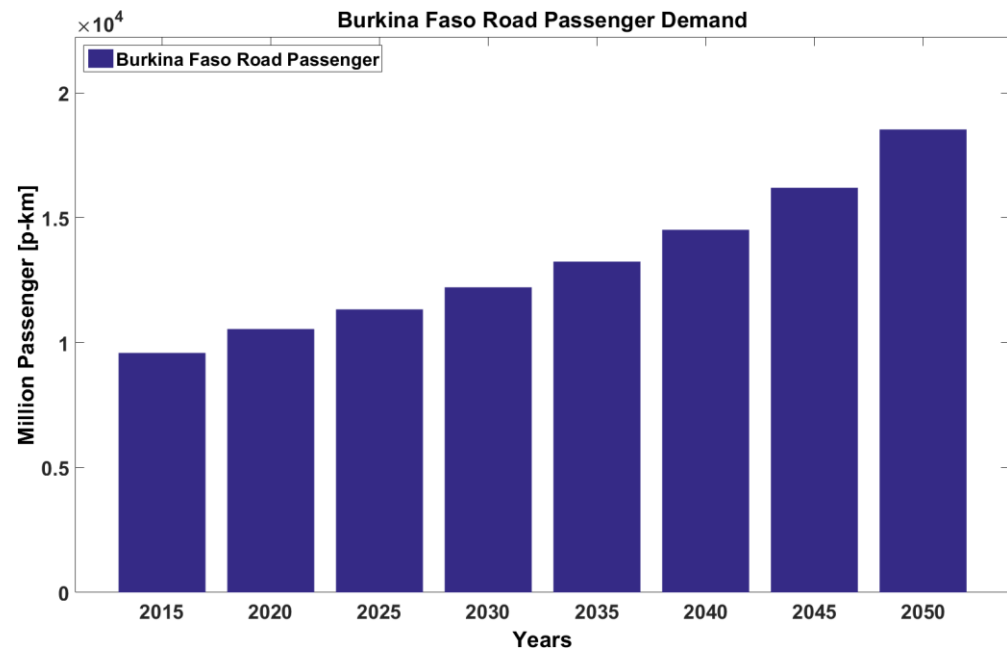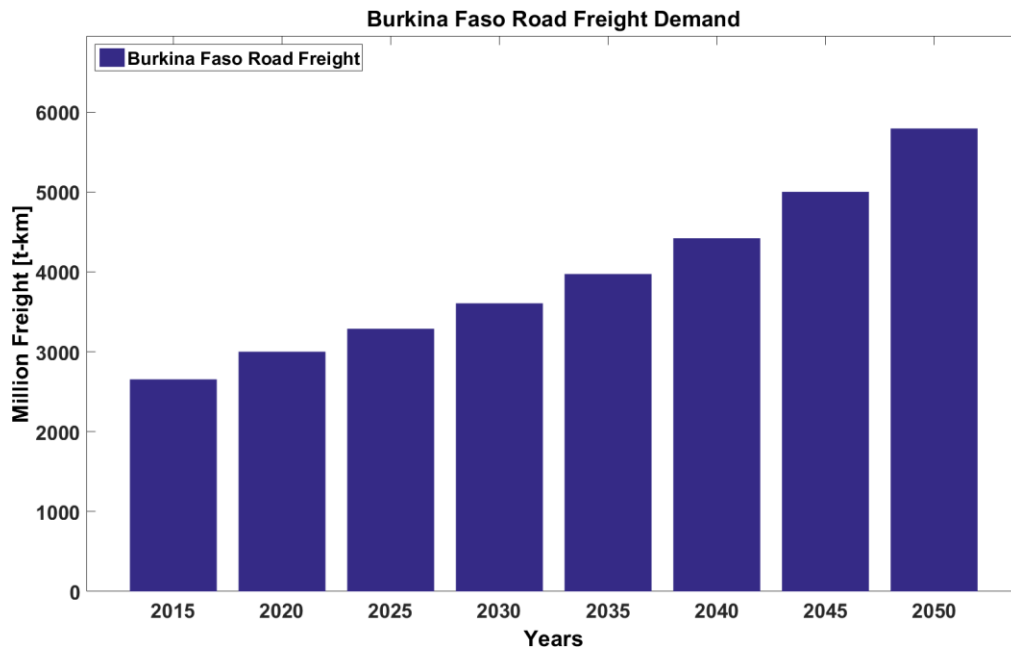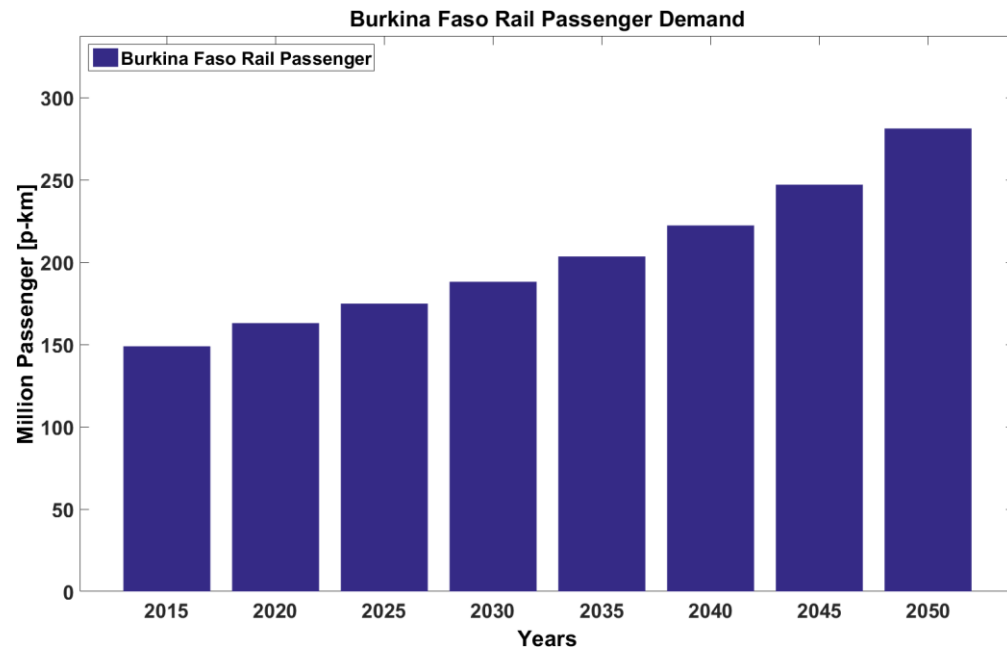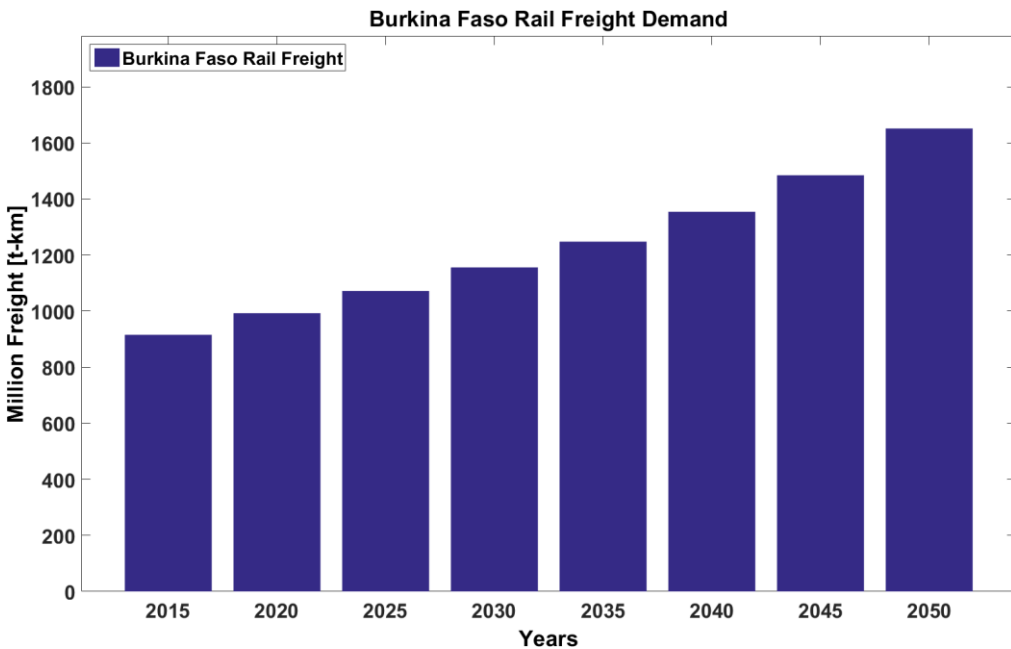

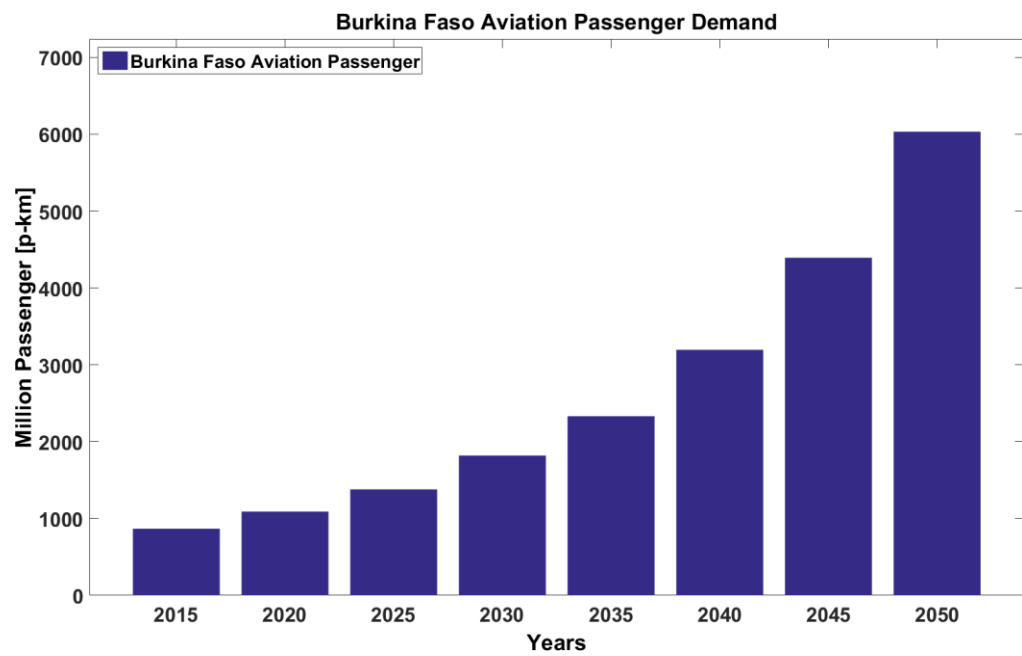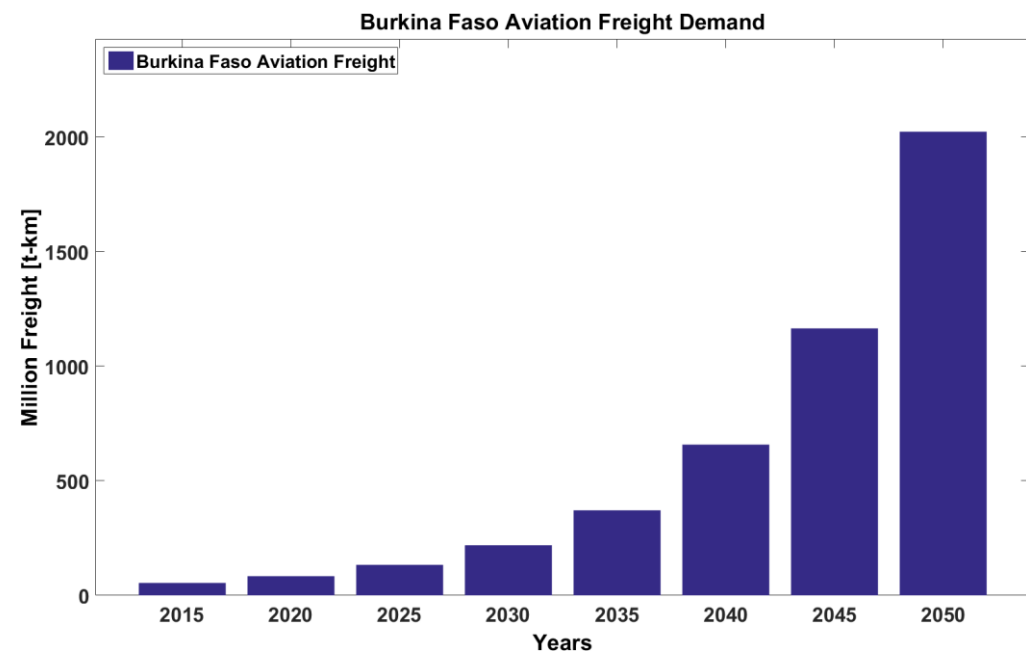

Burundi Road Passenger Demand

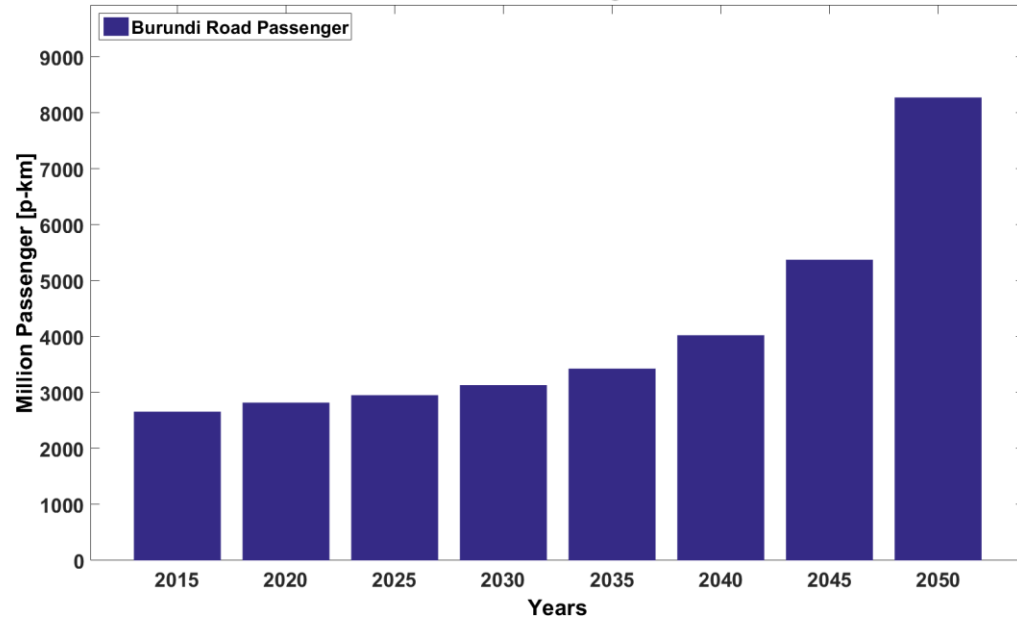

Burundi Road Freight Demand

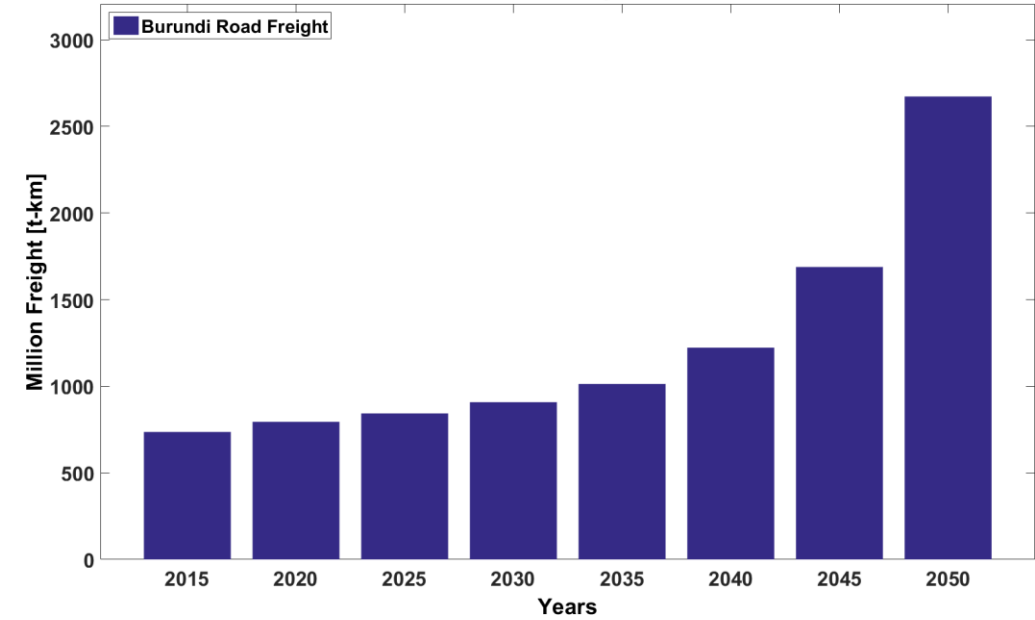

Burundi Rail Passenger Demand

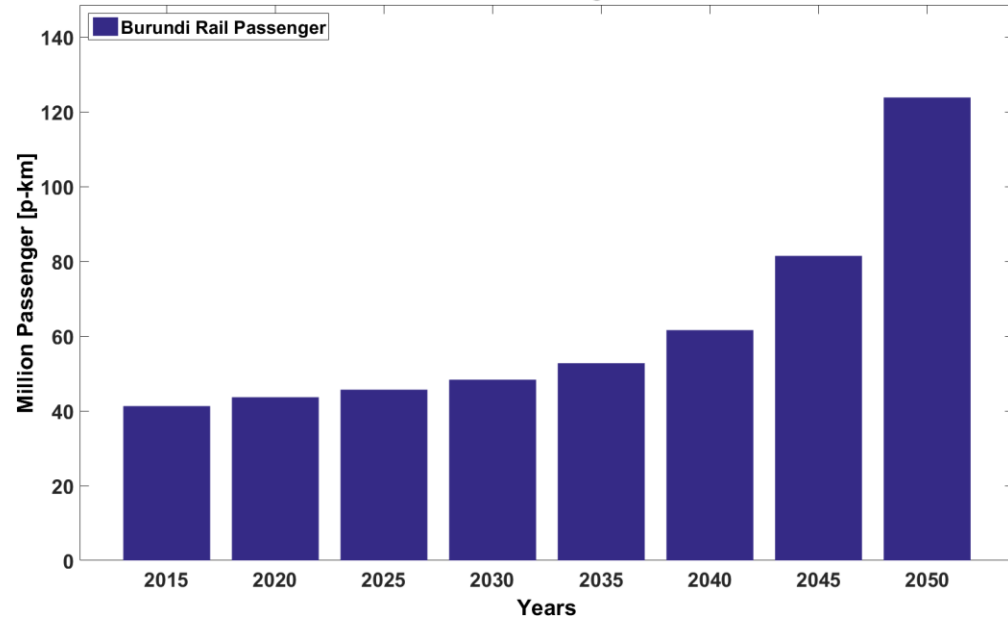

Burundi Rail Freight Demand

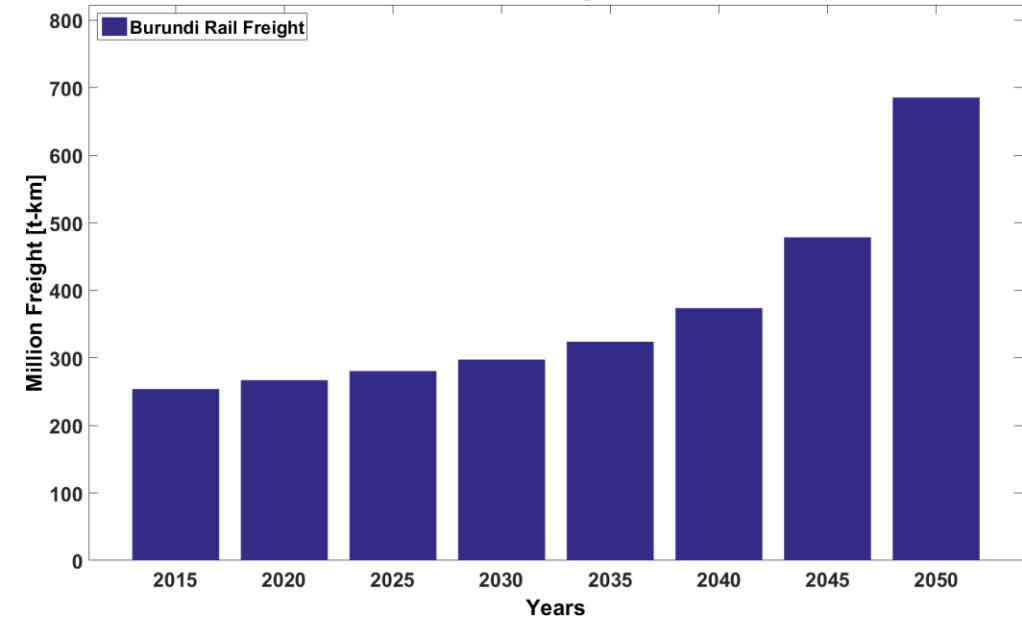

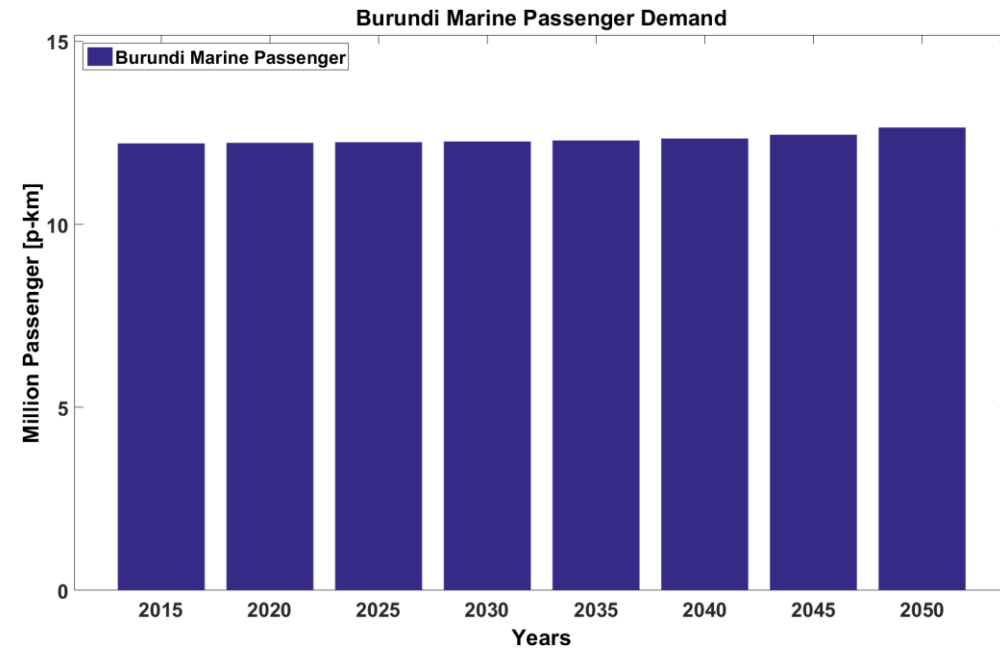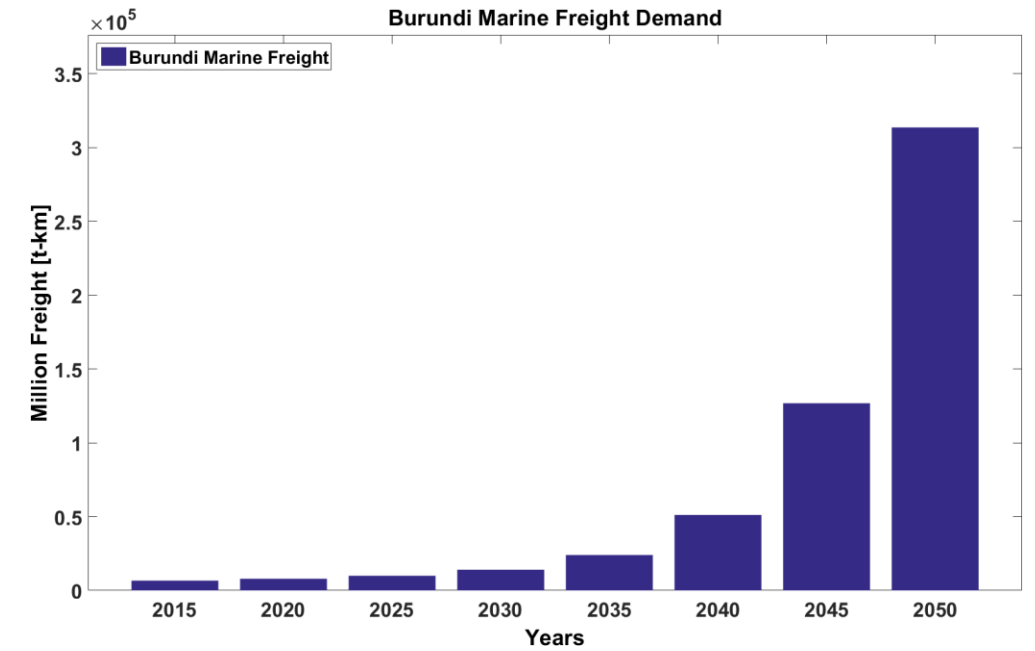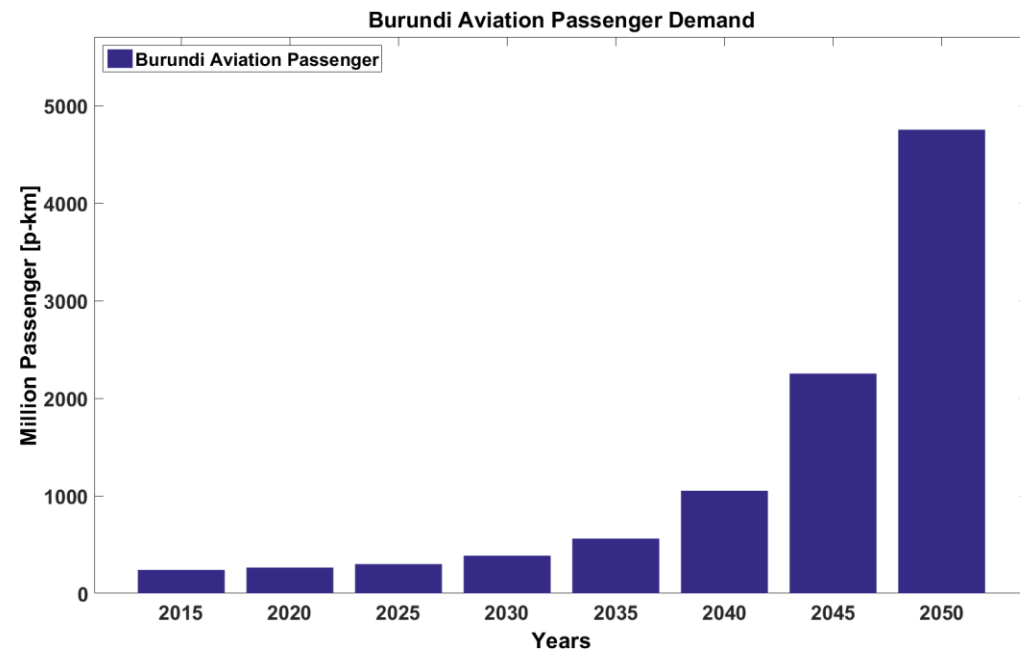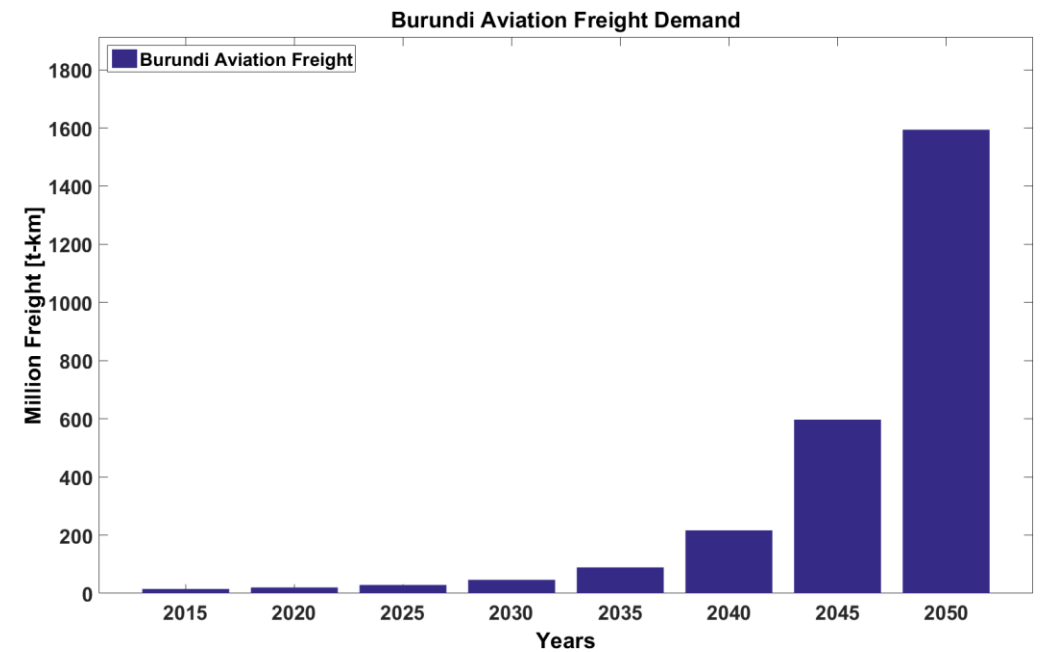

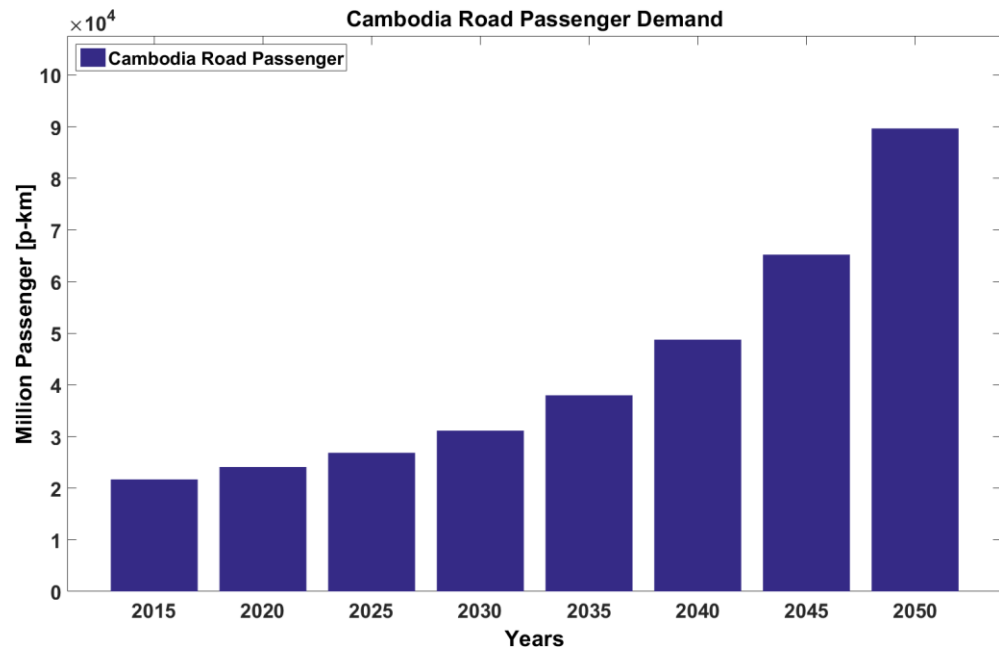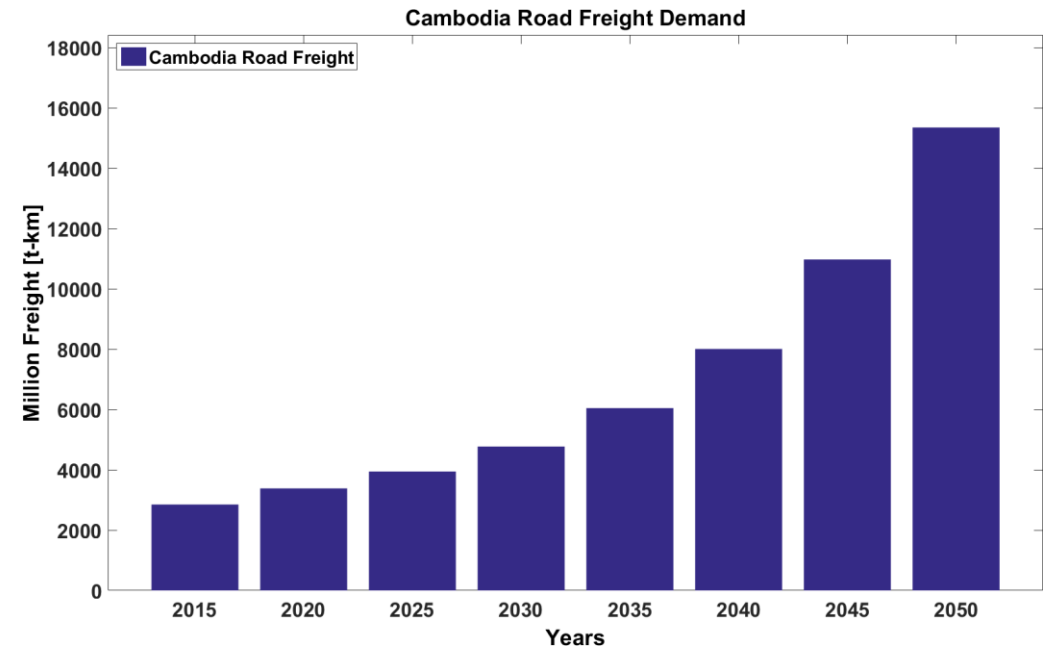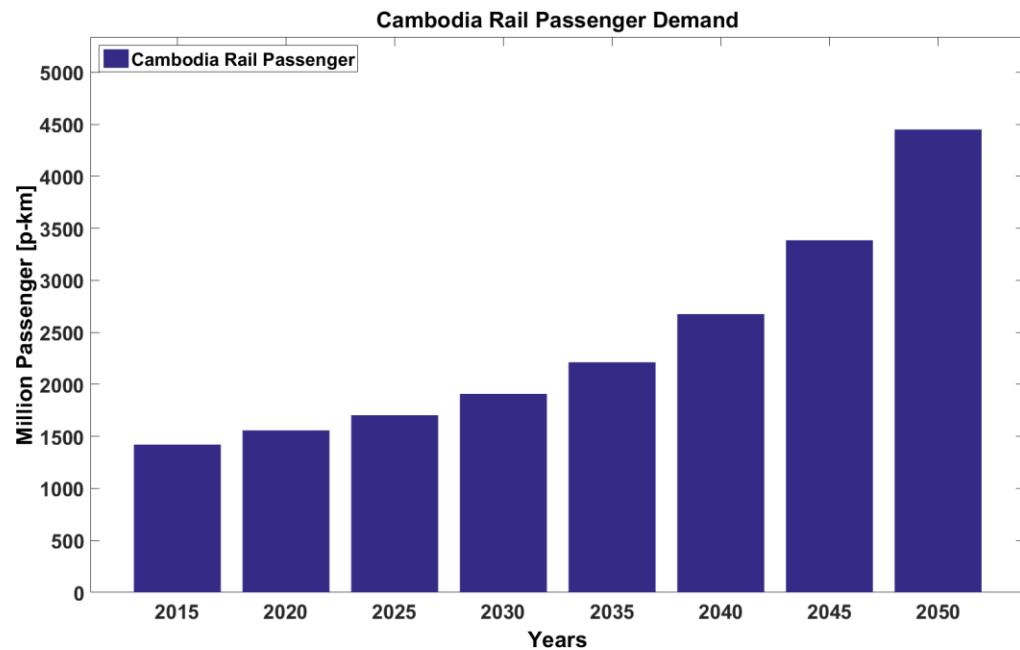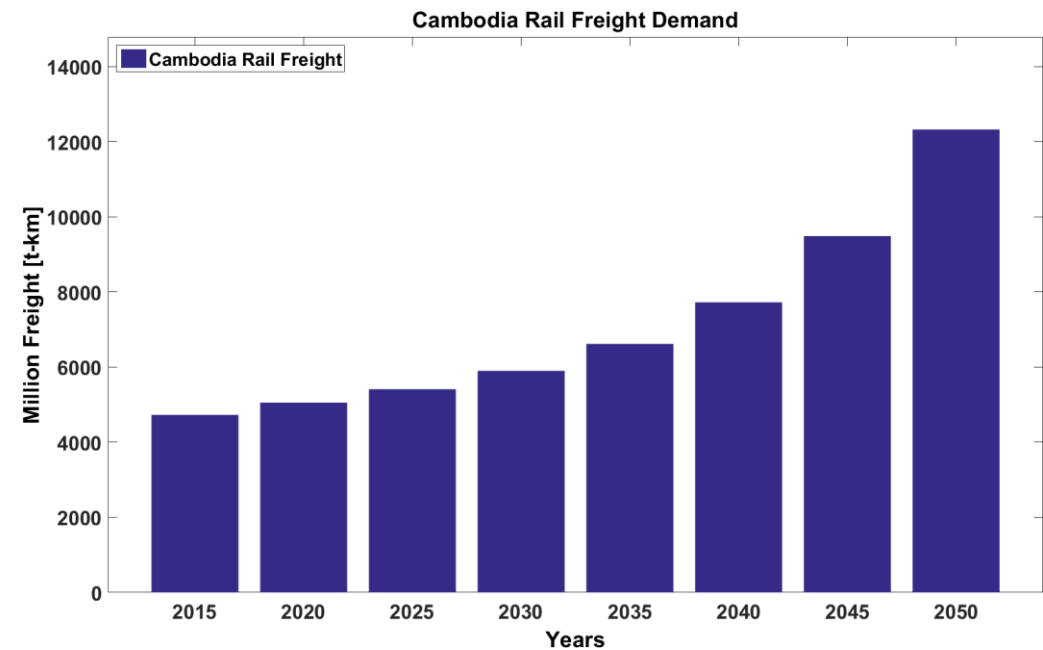

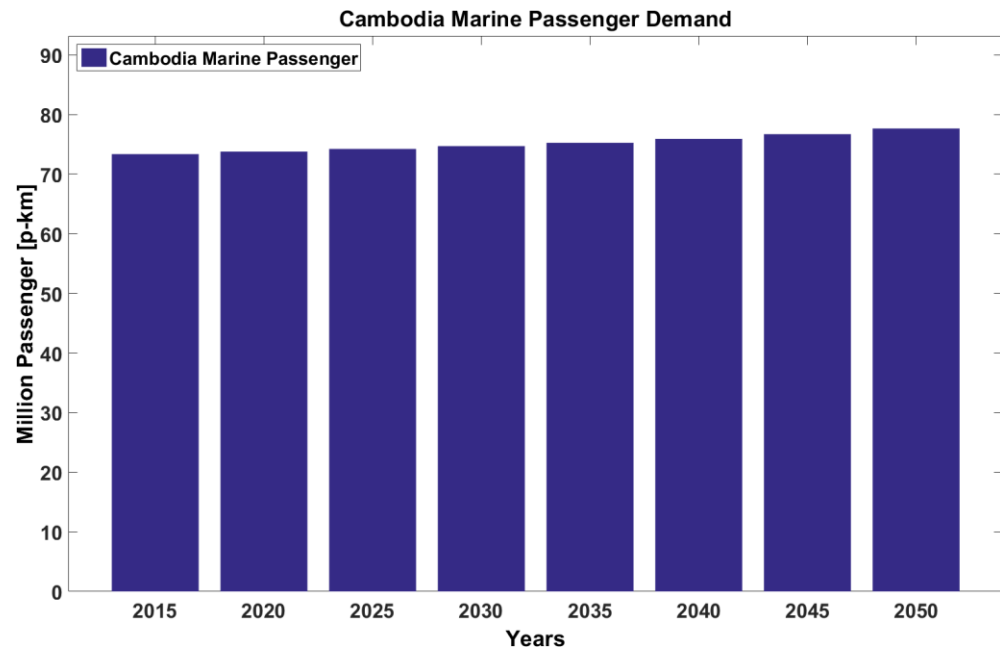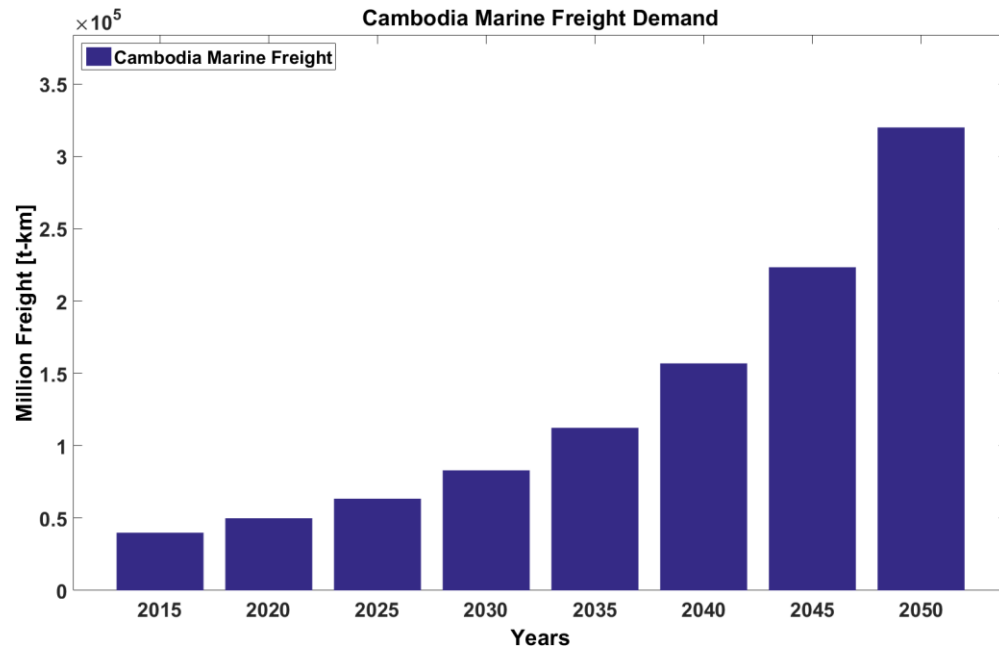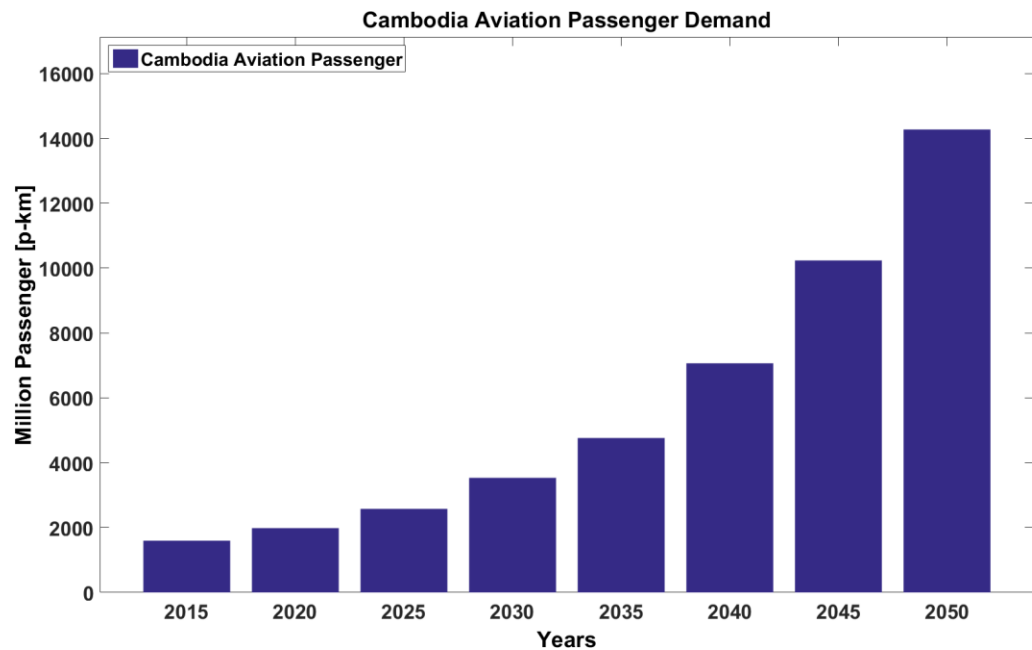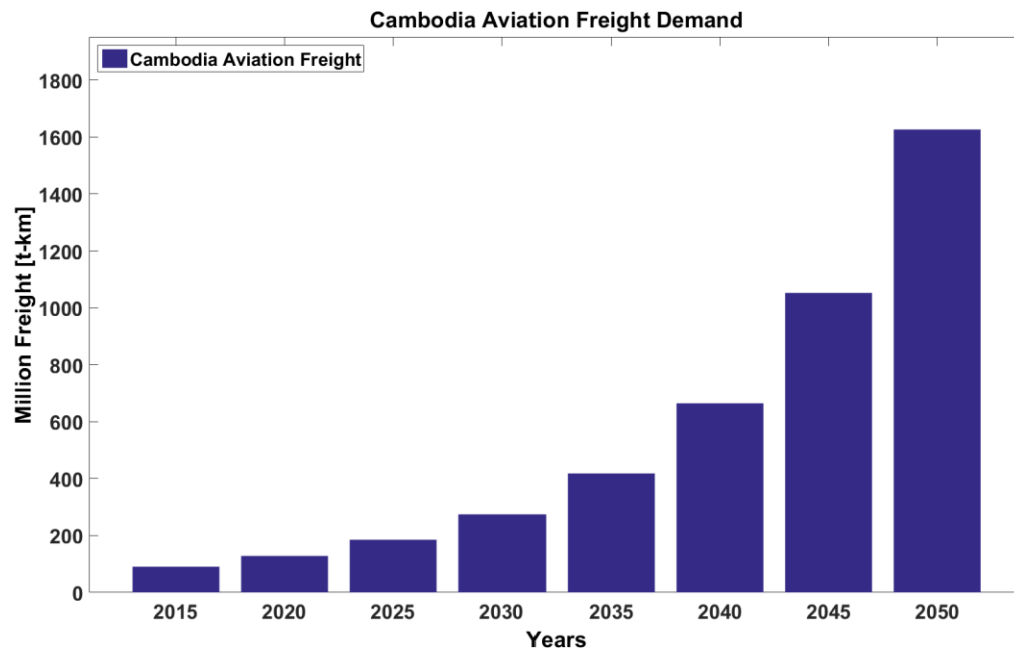

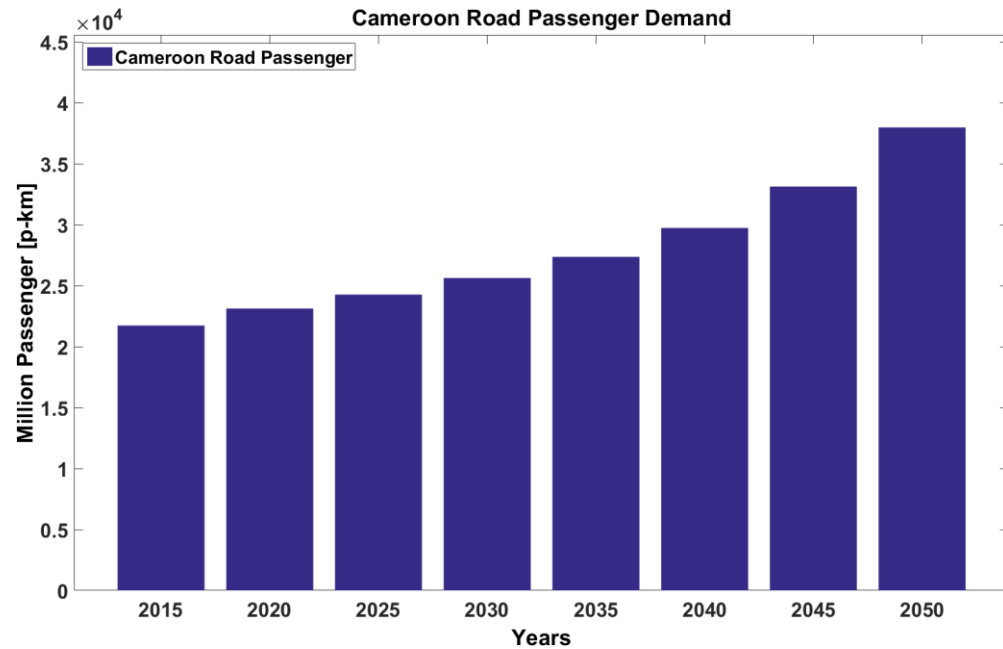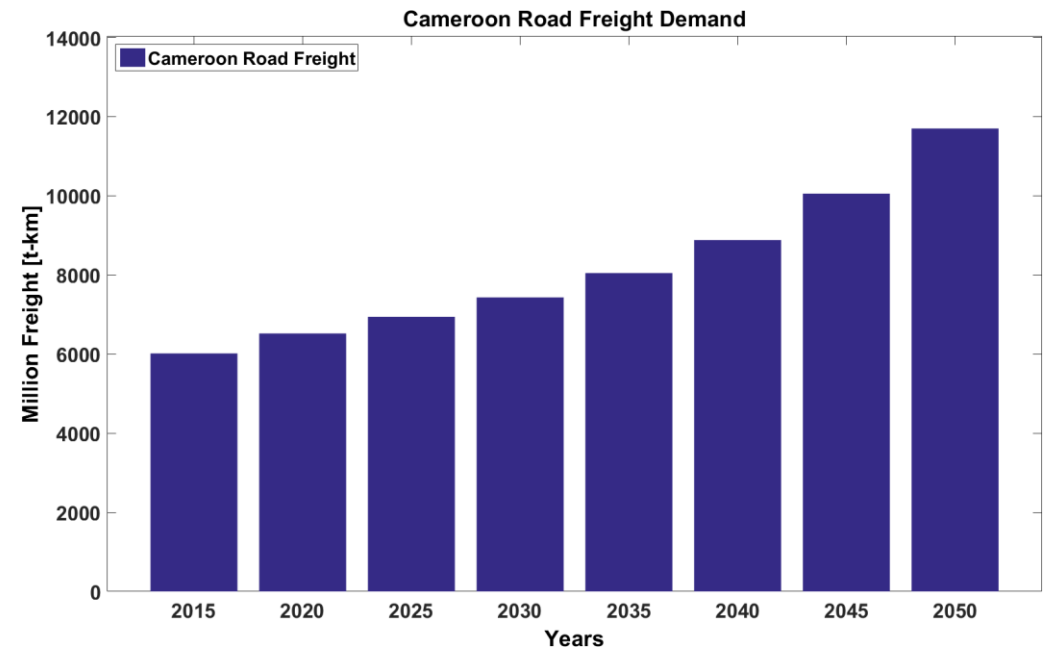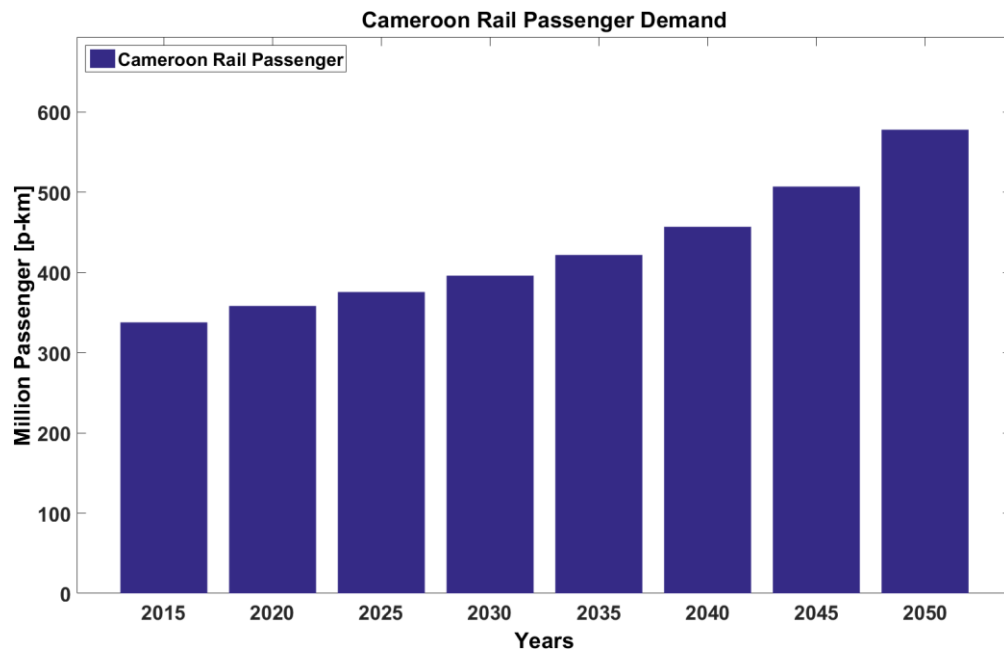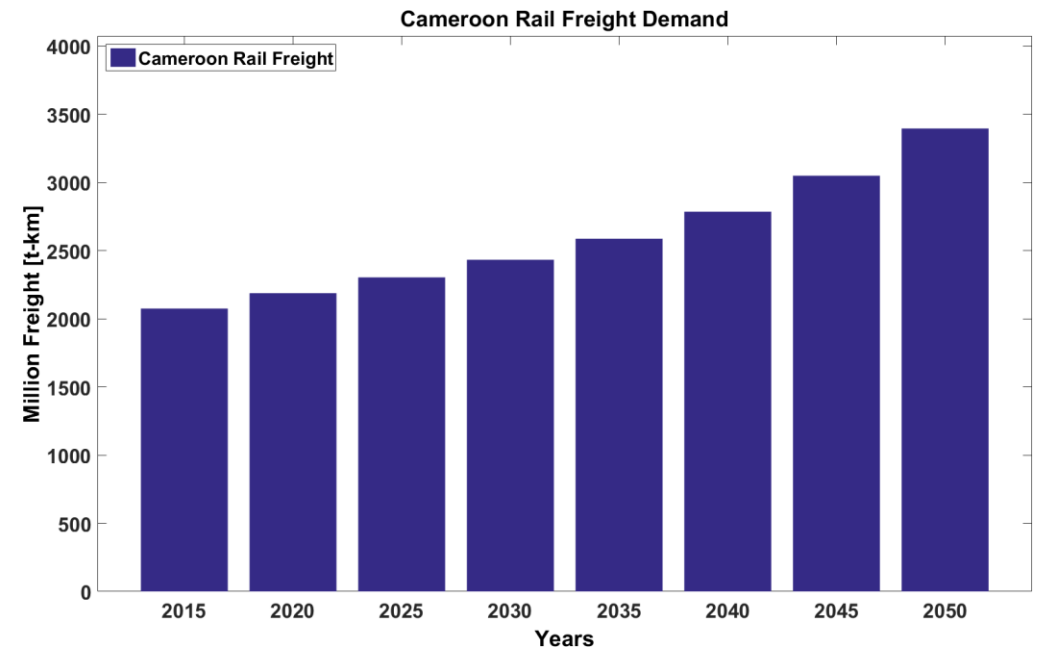



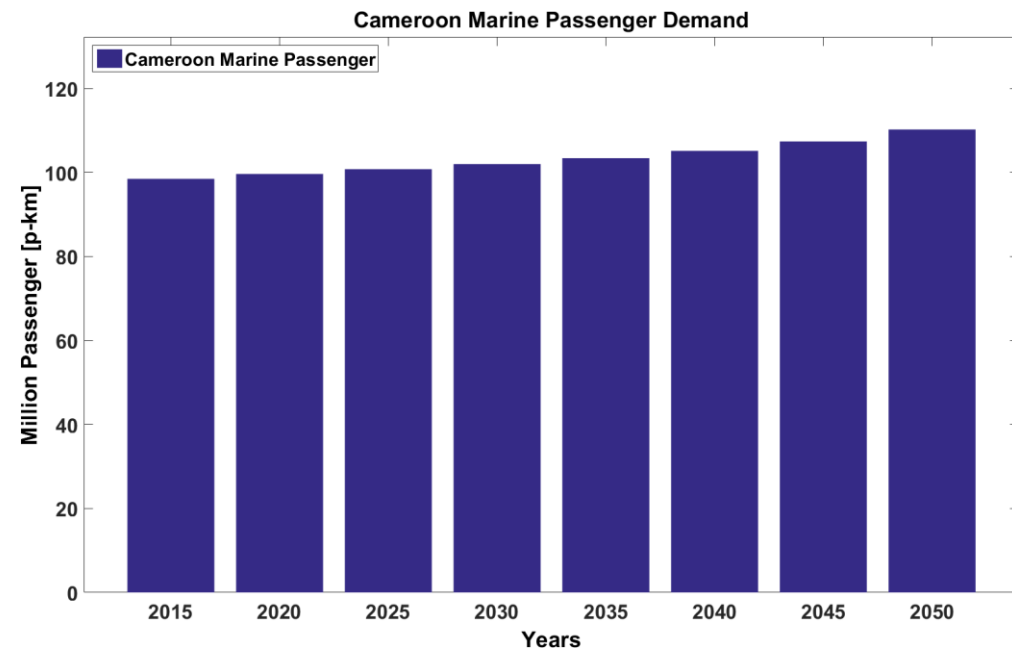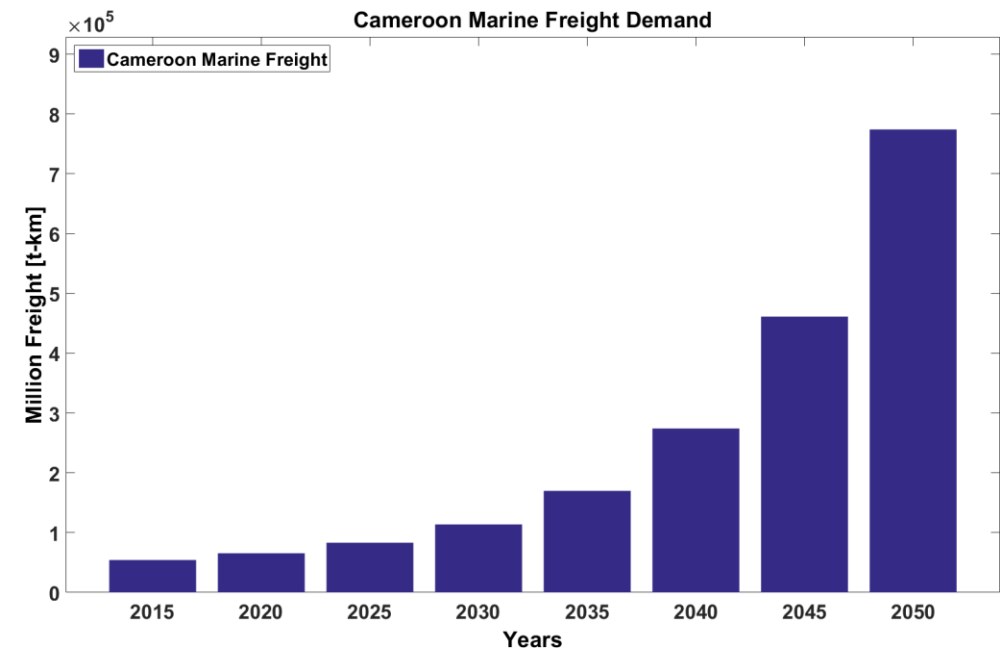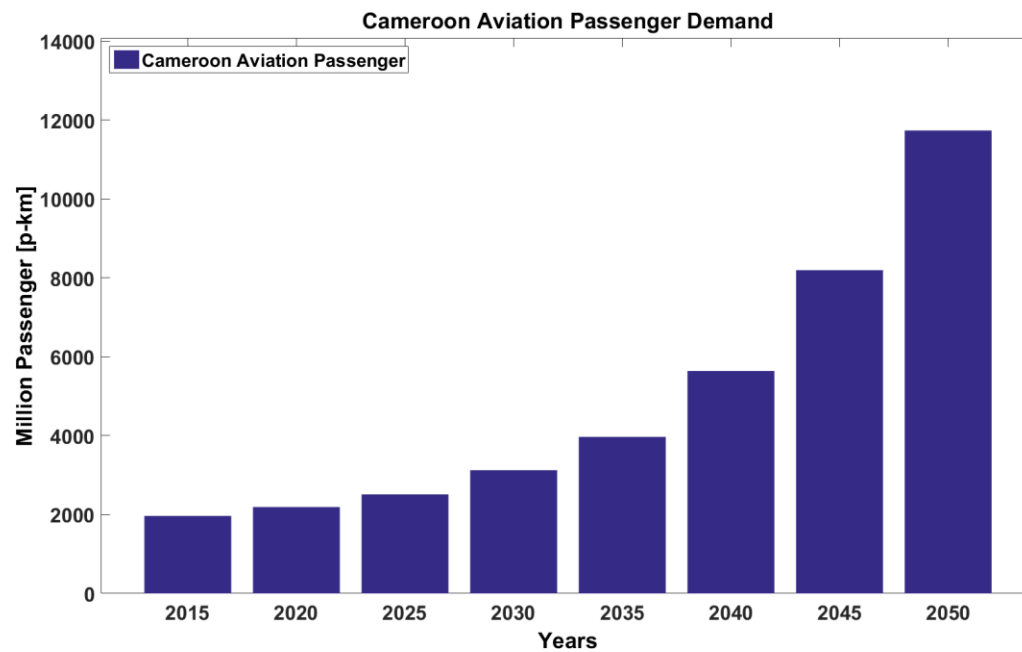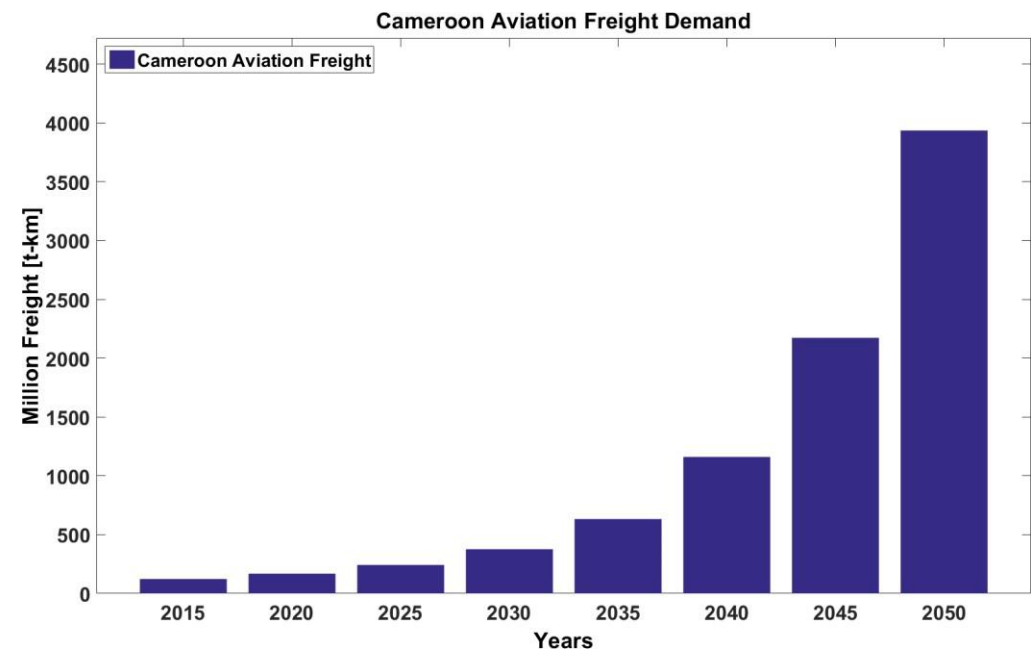

Supplement: s1 [file s1]
