# Supplementary material
Source: MDPI journal article supplement (https://www.mdpi.com/1996-1073/12/20/3870)
Supplement: s1 [file s1]

Archive with 6 entries (6 files):
- Supplementary_Material_Khalili2019_Data_final.xlsx
- Supplementary_Material_Khalili2019_Transportation_Demand_1.pdf
- Supplementary_Material_Khalili2019_Transportation_Demand_2.pdf
- Supplementary_Material_Khalili2019_Transportation_Demand_3.pdf
- Supplementary_Material_Khalili2019_Transportation_Demand_4.pdf
- Supplementary_Material_Khalili2019_Transportation_Demand_5.pdf
