# Supplementary material
Source: MDPI journal article supplement (https://www.mdpi.com/1996-1073/12/20/3870)
Supplement: s1 [file s1 › Supplementary_Material_Khalili2019_Data_final.xlsx]

## Sheet: overview
	this Supplementary Materials support the paper:
	Khalili S., Rantanen E., Bogdanov D., Breyer Ch., 2019. Global transportation demand development with impacts on the energy demand and greenhouse gas emissions in a climate constrained world, Energies
				xls
				table	columns
Tab	1	LDV	transportation demand	Transportation Demand	OV:PF
Tab	1	2W/3W	transportation demand	Transportation Demand	TM:TW
Tab	1	BUS	transportation demand	Transportation Demand	TX:UH
Tab	1	MDV	transportation demand	Transportation Demand	SQ:TA
Tab	1	HDV	transportation demand	Transportation Demand	ZK:ZU
Tab	2	road passenger	transportation demand	Transportation Demand	P:Z
Tab	2	road freight	transportation demand	Transportation Demand	E:O
Tab	2	rail passenger	transportation demand	Transportation Demand	AL:AV
Tab	2	rail freight	transportation demand	Transportation Demand	AA:AK
Tab	3	marine passenger	transportation demand	Transportation Demand	CD:CN
Tab	3	marine freight	transportation demand	Transportation Demand	BS:CC
Tab	4	aviation passenger	transportation demand	Transportation Demand	BH:BR
Tab	4	aviation freight	transportation demand	Transportation Demand	AW:BG
Tab	5	LDV	energy consumption; load factor	Mobility Efficiency	AX:BM
Tab	5	2W/3W	energy consumption; load factor	Mobility Efficiency	AX:BM
Tab	5	BUS	energy consumption; load factor	Mobility Efficiency	AX:BM
Tab	5	MDV	energy consumption; load factor	Mobility Efficiency	AX:BM
Tab	5	HDV	energy consumption; load factor	Mobility Efficiency	AX:BM
Tab	6	rail	spec energy demand	Mobility Efficiency	A:W
Tab	6	marine	spec energy demand	Mobility Efficiency	A:W
Tab	6	aviation	spec energy demand	Mobility Efficiency	A:W
Eq	7a		D	Table	1
Eq	7a		PPV	Transport Demand Data	diverse
Eq	7a		DPV	Table	10
Tab	7	LDV	vehicle price; battery/ hydrogen price	Road LCOM	A:M
Tab	7	BUS	vehicle price; battery/ hydrogen price	Road LCOM	A:M
Tab	7	MDV	vehicle price; battery/ hydrogen price	Road LCOM	A:M
Tab	7	HDV	vehicle price; battery/ hydrogen price	Road LCOM	A:M
Tab	7	all types	insurance; maintenance	Road Capex Opex	A:F
Tab	10	LDV	annual km per vehicle	Transportation Demand	DK:DU
Tab	10	2W/3W	annual km per vehicle	Transportation Demand	JT:KD
Tab	10	BUS	annual km per vehicle	Transportation Demand	ER:FB
Tab	10	MDV	annual km per vehicle	Transportation Demand	FY:GI
Tab	10	HDV	annual km per vehicle	Transportation Demand	HF:HP
Eq	12		TA; VT; F; ED	Final Energy Demand	A:N
Eq	13		TA; VT; F; ED; GHG	GHG emissions	A:K
Tab	19	LDV (ICE, BEV, PHEV, FCEV)	capex (platform, powertrain, battery/H2)	Road Capex Opex	A:L
Tab	19	BUS (ICE, BEV, PHEV, FCEV)	capex (platform, powertrain, battery/H2)	Road Capex Opex	A:L
Tab	19	MDV (ICE, BEV, PHEV, FCEV)	capex (platform, powertrain, battery/H2)	Road Capex Opex	A:L
Tab	19	HDV (ICE, BEV, PHEV, FCEV)	capex (platform, powertrain, battery/H2)	Road Capex Opex	A:L
Tab	20	LDV (ICE, BEV, PHEV, FCEV)	opex fixed	Road Capex Opex	A:L
Tab	20	BUS (ICE, BEV, PHEV, FCEV)	opex fixed	Road Capex Opex	A:L
Tab	20	MDV (ICE, BEV, PHEV, FCEV)	opex fixed	Road Capex Opex	A:L
Tab	20	HDV (ICE, BEV, PHEV, FCEV)	opex fixed	Road Capex Opex	A:L

## Sheet: Transportation Demand
				Road				Includes LHDT+MHDT+HHDT							Road				Includes LDV+BUS+2W+3W							Rail											Rail											Aviation
				Freight [million ton-km]											Passenger [million p-km]											Freight [million ton-km]											Passenger [million p-km]											Freight [million ton-km]
Countries List	Countries	Continent	Superregion	2000	2005	2010	2015	2020	2025	2030	2035	2040	2045	2050	2000	2005	2010	2015	2020	2025	2030	2035	2040	2045	2050	2000	2005	2010	2015	2020	2025	2030	2035	2040	2045	2050	2000	2005	2010	2015	2020	2025	2030	2035	2040	2045	2050	2000	2005
			World	7.34447e+06	8.83936e+06	1.08423e+07	1.27067e+07	1.48317e+07	1.6783e+07	1.90665e+07	2.16654e+07	2.48562e+07	2.83846e+07	3.21564e+07	2.85783e+07	3.35479e+07	3.86188e+07	4.61039e+07	5.47125e+07	6.22743e+07	7.10998e+07	8.05455e+07	9.18985e+07	1.05297e+08	1.20739e+08	7.34019e+06	9.2036e+06	1.01478e+07	1.11405e+07	1.23022e+07	1.33329e+07	1.452e+07	1.58979e+07	1.75913e+07	1.95664e+07	2.18571e+07	2.28728e+06	2.6231e+06	3.13276e+06	3.82082e+06	4.57263e+06	5.17056e+06	5.79179e+06	6.28043e+06	6.85416e+06	7.50376e+06	8.19296e+06	0	0
			Europe	2.22306e+06	2.51456e+06	2.76614e+06	2.98927e+06	3.22231e+06	3.45511e+06	3.72224e+06	4.01965e+06	4.35659e+06	4.73084e+06	5.14841e+06	5.6539e+06	6.01244e+06	6.30702e+06	6.89787e+06	7.53882e+06	8.1548e+06	8.85186e+06	9.63097e+06	1.04898e+07	1.1426e+07	1.24278e+07	656070	678692	630795	639257	657836	675631	698398	733931	775782	829324	889228	548122	571130	594707	637931	678848	715378	753927	793306	831826	867239	896577	0	0
			Eurasia	244640	274553	305726	331467	359731	388542	422295	461312	505391	554025	606816	874361	1.03627e+06	1.30495e+06	1.61996e+06	1.9588e+06	2.30361e+06	2.69515e+06	3.11694e+06	3.54554e+06	3.9555e+06	4.32468e+06	1.37052e+06	1.91229e+06	1.9694e+06	2.05661e+06	2.1527e+06	2.25384e+06	2.37258e+06	2.50709e+06	2.65407e+06	2.80915e+06	2.96658e+06	260930	260185	246678	306399	372672	439643	513815	590703	664820	730302	781447	0	0
			MENA	173917	239224	365568	441342	537877	647503	784903	958507	1.17857e+06	1.45693e+06	1.80711e+06	809259	1.01504e+06	1.41065e+06	1.65737e+06	1.97932e+06	2.34875e+06	2.81553e+06	3.4062e+06	4.15137e+06	5.08292e+06	6.23102e+06	55563.4	62311.6	72520.7	75624	86607.6	99231.9	114854	134861	161129	196279	244213	15569.7	18449.9	20911.3	24065.9	28253.8	32928.8	38629.2	45557.1	53879.5	63652.6	74750.5	0	0
			Sub-Saharan Africa	200748	253262	288545	354855	400057	439916	486179	539775	601660	672914	754914	798752	922422	1.0772e+06	1.28173e+06	1.40688e+06	1.51599e+06	1.64418e+06	1.79467e+06	1.97095e+06	2.17717e+06	2.41872e+06	76731.7	87714.3	105550	122370	132481	143475	155644	169076	183809	199820	217073	12410.8	14142.1	16848.3	19913.6	21754.7	23399.5	25321.5	27565.4	30178.8	33216.2	36747.7	0	0
			SAARC	426363	636050	1.02821e+06	1.72756e+06	2.59786e+06	3.42873e+06	4.38235e+06	5.42545e+06	6.81549e+06	8.31183e+06	9.85159e+06	2.39803e+06	3.16018e+06	4.32668e+06	6.48948e+06	8.90785e+06	1.09225e+07	1.3112e+07	1.48197e+07	1.74497e+07	2.14408e+07	2.72761e+07	426229	590052	830276	1.1614e+06	1.48331e+06	1.70942e+06	1.9002e+06	2.05646e+06	2.28989e+06	2.55626e+06	2.91239e+06	468286	574695	823408	1.25012e+06	1.70126e+06	2.04545e+06	2.38161e+06	2.57125e+06	2.86132e+06	3.28276e+06	3.84188e+06	0	0
			NE Asia	1.00959e+06	1.38943e+06	2.14704e+06	2.55189e+06	3.00746e+06	3.35274e+06	3.77992e+06	4.29422e+06	4.88787e+06	5.52929e+06	6.15646e+06	6.12022e+06	8.02274e+06	1.03808e+07	1.27199e+07	1.57852e+07	1.82606e+07	2.13702e+07	2.50959e+07	2.92885e+07	3.36026e+07	3.74992e+07	1.38686e+06	1.98817e+06	2.76995e+06	3.09603e+06	3.57392e+06	3.98852e+06	4.53517e+06	5.23673e+06	6.11057e+06	7.15888e+06	8.35796e+06	788923	968242	1.17284e+06	1.30282e+06	1.46526e+06	1.58516e+06	1.7212e+06	1.86079e+06	1.98121e+06	2.05015e+06	2.03368e+06	0	0
			SE Asia	378986	464373	504919	581696	665214	740927	834004	947087	1.08354e+06	1.24863e+06	1.45035e+06	1.79758e+06	2.36676e+06	2.93202e+06	3.27677e+06	3.66861e+06	4.03116e+06	4.48158e+06	5.0364e+06	5.7193e+06	6.56686e+06	7.63273e+06	538495	686988	828428	877384	933380	986216	1.05053e+06	1.12893e+06	1.22437e+06	1.34058e+06	1.48328e+06	134950	156595	188534	205608	225952	245925	270985	301912	339217	383136	433737	0	0
			N America	2.15687e+06	2.3943e+06	2.48063e+06	2.66305e+06	2.85141e+06	3.03913e+06	3.24643e+06	3.4736e+06	3.71985e+06	3.98333e+06	4.2616e+06	8.14564e+06	8.87115e+06	8.0722e+06	8.99831e+06	9.92442e+06	1.0817e+07	1.17577e+07	1.27352e+07	1.37345e+07	1.47387e+07	1.57339e+07	2.61408e+06	2.91245e+06	2.60433e+06	2.77657e+06	2.95425e+06	3.13321e+06	3.32751e+06	3.53594e+06	3.7565e+06	3.98665e+06	4.22392e+06	50776.7	52149.6	60839.2	65053.1	68819.7	72009.3	74647.9	76570.7	77636.3	77733.1	76849.7	0	0
			S America	530289	673607	955529	1.06561e+06	1.18976e+06	1.29042e+06	1.40818e+06	1.54584e+06	1.70718e+06	1.89686e+06	2.11916e+06	1.98056e+06	2.14091e+06	2.80734e+06	3.16253e+06	3.54261e+06	3.91981e+06	4.37156e+06	4.9096e+06	5.5488e+06	6.30602e+06	7.19428e+06	215644	284936	336572	335273	327658	343346	365113	394848	435142	489494	562452	7307.96	7511.41	8001.65	8899.71	9808.38	10666.2	11652.5	12779.6	14072.5	15564.8	17281.4	0	0
Africa Remaining							61185.5	68578.5	75163.5	83221.3	93271.2	105757	121349	141195	184083	194054	211179	221000	241470	259495	281823	310042	345608	390732	449196	17683.8	18452.9	20692.6	21099.5	22753.1	24569.4	26689	29207.7	32180.2	35683.8	39859.4	2860.23	2975.15	3303.02	3433.58	3734.7	4006.43	4341.19	4761.96	5289.24	5953.89	6808.6	0	0
Angola	Angola	Africa	Africa	13741.2	15536.9	16285.1	17629.5	20273.4	22309.7	24300.2	26235.1	28166.3	30193.1	32437.3	54674.5	56588	60795.5	63677.1	70997.5	76571.6	82087.2	87520.2	93021.1	98886.8	105498	5252.27	5381.03	5957.13	6079.42	6670.81	7232.47	7756.05	8240.97	8700.74	9156.17	9628.35	849.517	867.58	950.894	989.321	1097.01	1181.04	1263.73	1344.74	1426.3	1512.7	1609.35	0	0
Benin	Benin	Africa	Africa	1481.59	1705.52	1822.09	1920.33	2113.7	2282.87	2489.16	2758.44	3132.42	3668.17	4422.33	5895.07	6211.8	6802.24	6936.16	7471.56	7934.65	8506.27	9262.37	10327.6	11878.2	14099.8	566.307	590.689	666.527	662.214	705.467	752.129	806.391	873.877	962.911	1083.3	1241.97	91.596	95.2363	106.393	107.764	115.64	122.621	131.191	142.465	158.258	181.097	213.576	0	0
Botswana	Botswana	Africa	Africa	2329.92	2645.83	2925.84	3168.74	3415.18	3570.43	3695.63	3798.39	3887.26	3969.49	4050.67	9270.45	9636.57	10922.8	11445.4	12127.7	12552.7	12899.6	13188.2	13441.3	13679.3	13918.5	890.561	916.355	1070.28	1092.72	1147.85	1190.67	1223.6	1249.36	1270.51	1288.99	1306.07	144.042	147.743	170.842	177.822	187.859	194.266	199.467	203.77	207.522	211.028	214.524	0	0
Burkina Faso	Burkina Faso	Africa	Africa	1572.17	2034.73	2421.34	2654.51	2999.64	3286.96	3605.81	3972.71	4419.82	5000.35	5793.1	6255.45	7410.84	9039.36	9588.03	10543.6	11330.1	12213.6	13243.8	14517.4	16197.5	18532.8	600.927	704.707	885.734	915.395	992.593	1071.84	1155.71	1247.66	1354.11	1484.56	1651.35	97.1955	113.619	141.383	148.965	163.022	174.878	188.125	203.486	222.367	247.114	281.255	0	0
Burundi	Burundi	Africa	Africa	625.008	661.639	729.262	735.895	794.343	843.28	907.782	1013.05	1222.53	1688.48	2672.66	2486.83	2409.8	2722.48	2658.03	2819.86	2953.82	3132.55	3428.13	4024.82	5373.33	8272.56	238.896	229.151	266.766	253.77	266.843	280.341	297.308	323.69	373.561	478.263	685.332	38.6397	36.9459	42.582	41.2966	43.6772	45.6967	48.3763	52.7837	61.6299	81.4925	123.878	0	0
Cape Verde	Cape Verde	Africa	Africa	216.07	271.222	318.869	314.632	357.194	388.217	416.292	441.127	463.359	483.962	503.823	859.715	987.837	1190.4	1136.44	1254.29	1339.21	1417	1486.74	1550.06	1609.69	1668.2	82.5881	93.9348	116.643	108.499	118.019	126.576	133.961	140.185	145.478	150.108	154.286	13.358	15.145	18.6189	17.6563	19.39	20.6701	21.8365	22.8763	23.8151	24.6934	25.5487	0	0
Cameroon	Cameroon	Africa	Africa	4957.86	5653.43	5774.05	6016.57	6520.56	6940.7	7430.89	8046.97	8879.61	10054	11700.4	19726.7	20590.7	21555.7	21731.7	23127.1	24277.2	25635.5	27365.4	29737.1	33136	37986	1895.04	1958	2112.16	2074.78	2187.51	2303.4	2432.34	2586.74	2784.97	3048.87	3395.26	306.508	315.687	337.15	337.635	358.163	375.5	395.865	421.659	456.82	506.884	577.789	0	0
Central African Republic	Central African Republic	Africa	Africa	399.64	416.046	426.875	292.534	360.846	430.951	528.709	666.868	859.858	1119.81	1450.73	1590.12	1515.31	1593.61	1056.62	1245.76	1437.67	1708.56	2096.48	2646.2	3398.54	4373.37	152.754	144.093	156.152	100.879	116.159	135.495	161.21	195.835	241.78	300.194	369.818	24.7068	23.232	24.9255	16.4163	19.1987	22.0916	26.1529	31.9373	40.0871	51.1686	65.4201	0	0
Chad	Chad	Africa	Africa	1072.9	2222.13	2492.26	2840.97	3285.86	3677.89	4131.76	4665.22	5312.3	6124.35	7165.72	4268.94	8093.37	9304.09	10261.5	11493.3	12566.4	13824.1	15322	17165.1	19515.3	22583	410.093	769.61	911.674	979.695	1079.21	1187.34	1306.72	1440.42	1594.47	1776.94	1996.04	66.3296	124.084	145.524	159.428	177.549	193.726	212.582	234.917	262.242	296.859	341.708	0	0
Comoros	Comoros	Africa	Africa	100.411	106.95	102.426	169.883	225.501	272.302	325.414	385.495	451.085	519.319	587.45	399.521	389.531	382.375	613.614	767.608	895.718	1042.89	1211.59	1398.42	1595.9	1796.6	38.3798	37.0411	37.4676	58.5834	71.0239	83.9325	97.9033	112.961	128.576	143.908	158.243	6.20765	5.9721	5.98068	9.53343	11.7988	13.73	15.9366	18.452	21.2218	24.1305	27.0647	0	0
Congo Democratic Republic	Democratic Republic of Congo	Africa	Africa	3225.96	3696.32	4282.13	9512.14	11727.7	13988.3	16941.6	20716.9	25474	31413	38744.9	12835.7	13462.6	15986.1	34357.6	40491.9	46680.1	54863.7	65464.2	79014.2	96202.5	117801	1233.05	1280.18	1566.42	3280.21	3775.78	4399.31	5176.16	6122.32	7254.83	8589.37	10132	199.438	206.402	250.036	533.797	624.038	717.324	840.018	998.082	1198.97	1452.14	1767.9	0	0
Congo Republic	Congo	Africa	Africa	1871.33	2170.58	2477.63	2546.89	2806.8	3032.43	3296.63	3611.99	3990.87	4439.75	4955.71	7445.8	7905.62	9249.51	9199.29	9918.92	10536.6	11268.7	12154.1	13233.4	14532.5	16052.4	715.277	751.756	906.325	878.281	936.417	998.652	1068.15	1147.18	1237.38	1338.25	1446.81	115.691	121.205	144.67	142.925	153.511	162.822	173.798	187.002	203.001	222.137	244.357	0	0
Djibouti	Djibouti	Africa	Africa	198.034	217.907	244.216	255.223	279.552	298.364	317.277	336.637	357.311	380.453	407.228	787.952	793.654	911.708	921.858	989.22	1040.72	1093.12	1147.48	1206.37	1273.35	1352.22	75.6942	75.4696	89.335	88.0123	93.4542	98.643	103.618	108.47	113.392	118.592	124.225	12.243	12.1679	14.2599	14.3225	15.3134	16.0897	16.8754	17.686	18.559	19.5455	20.6986	0	0
Equatorial Guinea	Equatorial Guinea	Africa	Africa	801.935	2731.43	2948.52	2315.88	2601.66	2772.18	2899.22	2994.16	3068.92	3132.96	3193.04	3190.8	9948.34	11007.4	8364.87	9156.13	9622.94	9974.96	10241.5	10454.5	10639.8	10816.8	306.522	946.001	1078.58	798.617	862.54	909.576	942.992	966.784	984.584	998.974	1011.61	49.5777	152.523	172.166	129.961	141.601	148.638	153.916	157.891	161.048	163.778	166.365	0	0
Eritrea	Eritrea	Africa	Africa	737.698	795.716	677.268	853.776	1057.43	1320.47	1748.93	2351.48	3040.75	3696.43	4257.32	2935.21	2898.13	2528.38	3083.81	3647.69	4367.73	5554.98	7246.85	9210.19	11107.8	12760.1	281.969	275.587	247.747	294.42	339.974	412.526	525.228	676.238	840.334	987.67	1105.68	45.6065	44.4327	39.546	47.9117	56.2069	67.0613	84.8613	110.089	139.196	167.147	191.302	0	0
Ethiopia	Ethiopia	Africa	Africa	5326.66	6916.33	10256.2	13722.3	16661.7	19590.3	23303.3	27851.9	33267	39560.2	46698.1	21194.1	25190.4	38288.3	49564.4	57703.1	65719.8	76008.5	88780.2	104205	122418	143445	2036	2395.39	3751.73	4732.05	5389.54	6197.32	7173.99	8313.94	9603.12	11017.2	12519	329.308	386.207	598.863	770.059	889.786	1010.64	1164.89	1355.33	1584	1852.27	2159.68	0	0
Gabon	Gabon	Africa	Africa	2789.09	2889.14	2742.91	2892.16	3053.29	3162.52	3261.5	3354.69	3447.21	3544.11	3649.63	11097.4	10522.7	10239.8	10446.4	10892.5	11191.5	11465.8	11727.5	11991	12271.5	12582.3	1066.07	1000.62	1003.36	997.347	1033.39	1063.51	1089.55	1112.91	1134.93	1156.71	1178.91	172.429	161.329	160.16	162.301	168.864	173.371	177.483	181.385	185.292	189.423	193.967	0	0
Gambia	Gambia	Africa	Africa	248.906	274.451	305.119	292.899	332.472	365.617	402.523	445.146	497.267	565.136	657.844	990.365	999.597	1139.07	1057.94	1167.51	1258.24	1360.51	1480.19	1628.65	1825.07	2098.17	95.1389	95.053	111.613	101.005	109.856	118.998	128.706	139.388	151.797	167.047	186.553	15.388	15.3253	17.816	16.4368	18.0486	19.4164	20.9496	22.7341	24.9351	27.8283	31.8209	0	0
Ghana	Ghana	Africa	Africa	5540	6732.78	8166.89	10060.5	11743.4	13345	15274	17471.4	19825	22212.9	24543.3	22043	24521.9	30488.7	36338.2	40997.7	45381.9	50727.3	56897	63601.3	70512.1	77377.2	2117.55	2331.82	2987.47	3469.31	3845.73	4287.48	4794.91	5345.6	5905.94	6442.51	6932.83	342.498	375.958	476.869	564.569	633.115	699.205	779.347	871.344	970.737	1072.53	1172.89	0	0
Guinea	Guinea	Africa	Africa	77.8225	92.3271	92.9103	95.2304	107.866	119.378	134.138	154.557	184.516	229.176	293.321	309.646	336.271	346.853	343.97	378.955	410.467	451.368	508.701	594.036	723.29	912.249	29.746	31.9765	33.9868	32.8397	35.666	38.8413	42.7238	47.8412	54.9735	65.009	78.5049	4.8112	5.15554	5.42508	5.34409	5.85876	6.3338	6.947	7.8019	9.06702	10.9708	13.7333	0	0
Guinea-Bissau	Guinea-Bissau	Africa	Africa	219.231	227.195	236.352	400.835	531.773	641.894	767.32	910.351	1067.62	1231.93	1396.05	872.293	827.482	882.35	1447.81	1810.34	2111.78	2459.34	2860.95	3308.93	3784.45	4267.92	83.7964	78.6864	86.4583	138.226	167.514	197.887	230.88	266.726	304.168	341.088	375.619	13.5535	12.6865	13.8007	22.4939	27.8271	32.3713	37.582	43.5704	50.2119	57.216	64.2842	0	0
Ivory Coast	Ivory Coast (Cote d’Ivoire)	Africa	Africa	6046.65	6309.29	5933.5	6638.4	7058.2	7389.55	7761.38	8225.78	8875.82	9864.9	11398.9	24058.9	22979.5	22150.9	23977.7	25140	26047.1	27077.4	28381.4	30233	33095.5	37614.4	2311.2	2185.15	2170.49	2289.22	2383.12	2474.51	2572.32	2688.7	2843.46	3065.71	3388.47	373.82	352.31	346.46	372.531	389.629	403.303	418.75	438.193	465.644	507.807	573.872	0	0
Kenya	Kenya	Africa	Africa	8682.86	9867.34	11149.1	11911.7	13357.9	14845.1	16992.3	20130.8	24438.5	29660.7	35191.7	34548	35938.5	41621.7	43024.7	47028.8	51100	57049.9	65862.2	78132.5	93246.1	109539	3318.84	3417.44	4078.36	4107.69	4431.16	4841.38	5406.19	6192.74	7218.29	8391.74	9555.45	536.798	550.992	650.999	668.455	727.358	788.731	877.936	1009.34	1191.25	1413.86	1652.06	0	0
Lesotho	Lesotho	Africa	Africa	391.541	428.916	488.837	494.823	539.891	573.562	606.854	641.076	678.428	721.954	775.507	1557.89	1562.18	1824.93	1787.29	1912.07	2004.24	2096.49	2192.58	2298.98	2424.95	2582.7	149.658	148.55	178.818	170.637	180.718	190.005	198.762	207.339	216.231	226.012	237.279	24.2061	23.9506	28.5435	27.7682	29.6039	30.9933	32.3764	33.8092	35.3866	37.242	39.5484	0	0
Liberia	Liberia	Africa	Africa	313.265	239.989	300.824	354.105	419.854	486.21	575.49	697.128	864.088	1092.3	1396.89	1246.44	874.081	1123.04	1279.02	1461.06	1642.7	1890.1	2231.64	2707.21	3367.7	4264.95	119.739	83.1175	110.042	122.111	136.818	155.12	178.605	209.089	248.838	300.12	364.203	19.3669	13.401	17.5653	19.8715	22.5495	25.2877	28.9968	34.0895	41.1401	50.8686	63.986	0	0
Madagascar	Madagascar	Africa	Africa	2948.16	3135.96	3191.88	2994.82	3225.89	3412.89	3627.81	3904.13	4308.22	4967.59	6097.58	11730.4	11421.7	11915.9	10817.2	11457	11968.9	12564.4	13340.3	14491.3	16399.6	19728.4	1126.87	1086.11	1167.6	1032.75	1084.43	1136.01	1192.54	1261.79	1358	1506.16	1743.91	182.263	175.112	186.376	168.062	177.474	185.19	194.119	205.688	222.752	250.86	299.525	0	0
Malawi	Malawi	Africa	Africa	927.105	968.805	1205.5	1237.08	1399.45	1559.66	1786.07	2134.5	2707.5	3662.92	5174.69	3688.84	3528.55	4500.37	4468.31	4917.87	5356.41	5983.79	6962.14	8594.29	11359.4	15812.8	354.366	335.535	440.975	426.601	462.92	507.108	566.663	653.987	790.402	1005.09	1323.16	57.3161	54.098	70.3898	69.422	76.0355	82.6464	92.0524	106.641	130.838	171.566	236.673	0	0
Mali	Mali	Africa	Africa	1160.46	1477.82	1600.86	1560.56	1752.21	1929.01	2154.41	2462.78	2912.24	3585.03	4568.84	4617.31	5382.47	5976.32	5636.68	6167.32	6651.29	7275.88	8141.74	9421.99	11369.1	14267.3	443.559	511.826	585.598	538.149	581.018	629.783	689.073	766.357	873.36	1024.54	1231.53	71.7425	82.5214	93.4748	87.5744	95.3807	102.676	112.04	124.951	143.932	172.612	214.981	0	0
Mauritania	Mauritania	Africa	Africa	960.032	1144.33	1296.9	1368.47	1507.19	1626.83	1767.16	1937.71	2150.59	2417.35	2743.21	3819.85	4167.86	4841.58	4942.89	5326.97	5654.47	6043.3	6522.18	7128.58	7900.61	8860.54	366.952	396.327	474.409	471.911	502.94	535.939	572.849	615.592	666.275	726.217	794.778	59.3518	63.8996	75.7265	76.7954	82.4456	87.3825	93.2121	100.353	109.343	120.714	134.748	0	0
Mozambique	Mozambique	Africa	Africa	1313.93	1911.91	2420.85	3027.89	3658.57	4277.31	5065.64	6064.26	7334.62	8964.1	11059.1	5227.95	6963.51	9037.53	10936.6	12682.9	14376.6	16561	19365	22983.5	27699.5	33870.9	502.22	662.169	885.555	1044.15	1185.22	1355.88	1563.25	1813.52	2115.95	2482.11	2922.89	81.2304	106.761	141.355	169.918	195.606	221.138	253.889	295.699	349.345	418.808	509.031	0	0
Namibia	Namibia	Africa	Africa	1501.68	1815.86	2002.37	2165.96	2398.08	2575.57	2749.5	2917.63	3081.12	3242.73	3405.03	5975.01	6613.68	7475.26	7823.37	8466.08	8951.91	9433.87	9905.97	10371.7	10839.4	11317.5	573.987	628.904	732.474	746.918	798.84	847.793	893.544	935.682	974.604	1010.92	1045.07	92.8381	101.398	116.92	121.548	131.003	138.327	145.552	152.592	159.496	166.385	173.375	0	0
Niger	Niger	Africa	Africa	1107.24	1278.86	1456.03	2781.38	3447.91	4128.53	5047.75	6296.66	7998.95	10306.5	13380.1	4405.58	4657.81	5435.66	10046.3	11891.7	13754.9	16302	19808.7	24657.6	31335.9	40390.1	423.22	442.917	532.621	959.145	1108.23	1295.96	1537.76	1850.75	2256.02	2774.54	3421.21	68.4527	71.4112	85.0185	156.084	183.233	211.319	249.507	301.796	373.682	472.049	604.418	0	0
Nigeria	Nigeria	Africa	Africa	45123.7	70955.9	88941.1	100408	116139	129995	145423	161953	179191	196934	215189	179542	258433	332035	362670	406227	444156	486905	533319	582421	633771	687546	17247.6	24574.8	32534.9	34625.1	38143.9	41965.7	46023.7	50166.4	54270.4	58257.3	62098	2789.67	3962.17	5193.31	5634.63	6275.4	6847.16	7488.08	8180.16	8908.12	9664.46	10450.6	0	0
Reunion		Africa	Africa	0	0	0	0	0	0	0	0	0	0	0	0	0	0	0	0	0	0	0	0	0	0	0	0	0	0	0	0	0	0	0	0	0	0	0	0	0	0	0	0	0	0	0	0	0	0
Rwanda	Rwanda	Africa	Africa	830.532	1129.55	1489.34	1794.47	2252.59	2839.98	3775.33	5047.13	6452.83	7750	8827.6	3304.58	4114.03	5560	6481.58	7750.02	9357.91	11949.8	15520.8	19524.8	23279	26453.4	317.453	391.208	544.804	618.814	721.286	883.299	1129.34	1448.07	1782.73	2074.21	2300.94	51.3457	63.0742	86.9632	100.701	119.361	143.6	182.458	235.705	295.067	350.364	396.772	0	0
Saint Helena		Africa	Africa	0	0	0	0	0	0	0	0	0	0	0	0	0	0	0	0	0	0	0	0	0	0	0	0	0	0	0	0	0	0	0	0	0	0	0	0	0	0	0	0	0	0	0	0	0	0
Sao Tome and Principe	Sao Tome and Principe	Africa	Africa	45.2133	47.986	52.1298	49.9268	53.3877	56.4939	60.5745	66.489	75.5921	89.2225	107.333	179.898	174.773	194.611	180.334	189.917	198.419	209.727	226.334	252.263	291.711	345.062	17.2818	16.6194	19.0692	17.217	17.9911	18.8479	19.9212	21.4035	23.5707	26.6336	30.444	2.7952	2.67954	3.04388	2.80177	2.94273	3.07091	3.24044	3.48806	3.87248	4.45352	5.23349	0	0
Senegal	Senegal	Africa	Africa	2456.51	2932.2	3086.19	3043.09	3298.17	3500.23	3726.07	4003.5	4381.5	4942.8	5810.96	9774.14	10679.6	11521.4	10991.6	11697.8	12250.9	12876.7	13655.7	14732.4	16356.9	18914.3	938.948	1015.53	1128.94	1049.39	1106.45	1162.18	1221.59	1291.12	1381.11	1507.24	1689.89	151.868	163.734	180.204	170.771	181.16	189.498	198.881	210.496	226.459	250.386	287.775	0	0
Seychelles	Seychelles	Africa	Africa	193.906	194.473	206.418	218.562	231.124	238.577	244.132	248.232	251.303	253.672	255.548	771.526	708.303	770.601	789.439	824.222	844.624	860.016	871.526	880.276	887.13	892.657	74.1162	67.3535	75.5084	75.3699	78.1798	80.2356	81.6968	82.7241	83.4554	83.9876	84.3824	11.9878	10.8594	12.0529	12.2651	12.7768	13.0844	13.3152	13.4868	13.6165	13.7175	13.7983	0	0
Sierra Leone	Sierra Leone	Africa	Africa	540.806	731.987	846.159	1141.15	1331.7	1519.47	1762.36	2070.75	2448.87	2891.32	3382.31	2151.8	2666.02	3158.88	4121.8	4649.4	5163.4	5836.44	6702.34	7779.39	9059.91	10506.3	206.711	253.515	309.527	393.52	436.142	487.934	551.824	629.111	719.13	818.552	921.855	33.4341	40.8741	49.4077	64.0385	71.7999	79.5484	89.639	102.55	118.518	137.379	158.524	0	0
Somalia	Somalia	Africa	Africa	467.663	509.616	617.195	859.162	1118.25	1418.53	1828.03	2347.84	2985.72	3763.08	4714.41	1860.77	1856.11	2304.11	3103.27	3820.61	4642.6	5777.33	7236.85	9053.81	11303.6	14106.1	178.754	176.5	225.772	296.277	354.229	437.053	544.77	675.042	826.903	1001.58	1201.74	28.9122	28.4569	36.0383	48.214	58.7668	71.1581	88.1706	109.934	136.871	170.009	210.979	0	0
South Africa	South Africa	Africa	Africa	57711	66254.7	67949.3	62317.3	65476.4	67755.6	69954.8	72097.3	74216.1	76339.2	78470.3	229625	241311	253669	225088	233835	240074	246168	252184	258219	264364	270641	22058.8	22946.6	24856.1	21489.8	22196.4	22825.1	23403.5	23940.5	24444.9	24922	25370.4	3567.85	3699.66	3967.6	3497.09	3625.76	3719.82	3811.18	3900.88	3990.36	4080.86	4172.64	0	0
Sudan	Sudan	Africa	Africa	1934.95	2632.47	3549.28	4463.15	5080.06	5569.94	6073.41	6599.28	7166.05	7804.4	8552.13	7698.93	9587.91	13250.2	16120.7	17828.8	19169.8	20564.9	22041.5	23655.9	25503.4	27706.1	739.594	911.727	1298.34	1539.09	1677.08	1812.2	1944.63	2076.43	2211.36	2354.8	2512.12	119.624	146.997	207.244	250.461	275.588	295.803	316.719	338.736	362.671	389.883	422.085	0	0
Swaziland	Swaziland	Africa	Africa	943.988	995.879	992.992	920.304	971.712	1008.9	1045.37	1082.86	1123.41	1169.32	1222.37	3756.01	3627.16	3707.04	3324.11	3466.45	3568.25	3669.31	3774.56	3890.08	4022.93	4179.23	360.819	344.911	363.239	317.362	328.861	339.119	348.712	358.106	367.761	378.076	389.239	58.3599	55.6098	57.9813	51.6452	53.739	55.2737	56.7888	58.3583	60.0708	62.0277	64.3126	0	0
Tanzania	United Republic of Tanzania	Africa	Africa	6556.74	8828.62	10495.3	12043.5	13803.6	15446	17512.3	20170.9	23638.8	28148	33881.8	26088.5	32155.3	39180.9	43500.7	48374	52869.9	58595.7	66060.6	75938.7	88988.9	105880	2506.17	3057.69	3839.2	4153.13	4546.82	4999.84	5543.37	6209.66	7035.27	8048.52	9254.9	405.355	492.989	612.824	675.849	747.541	815.315	901.159	1012.47	1158.92	1351.14	1598.07	0	0
Togo	Togo	Africa	Africa	821.877	825.703	855.69	1603.73	2132.97	2585.6	3111.63	3724.21	4412.7	5147.52	5899.13	3270.15	3007.35	3194.46	5792.62	7257.96	8496.99	9954.63	11674.6	13635.7	15762.4	17976.5	314.145	285.973	313.014	553.037	671.416	796.262	934.631	1088.15	1252.06	1417.18	1575.32	50.8106	46.1072	49.9642	89.9972	111.554	130.232	152.085	177.733	206.807	238.131	270.501	0	0
Uganda	Uganda	Africa	Africa	3274.05	4303.88	5608.24	44638.9	48797.4	51985.2	55226.6	58594.6	62197.8	66156.9	70579.7	13027	15675.5	20936.7	161234	172748	181475	190456	199913	210177	221635	234664	1251.43	1490.6	2051.51	15393.5	16323.7	17202.9	18055.5	18899.6	19757.4	20647.1	21577.6	202.41	240.328	327.468	2505.02	2674.4	2805.95	2940.61	3081.62	3233.78	3402.55	3593.03	0	0
Western Sahara	Western Sahara	Africa	Africa	0	0	0	0	0	0	0	0	0	0	0	0	0	0	0	0	0	0	0	0	0	0	0	0	0	0	0	0	0	0	0	0	0	0	0	0	0	0	0	0	0	0	0	0	0	0
Zambia	Zambia	Africa	Africa	2879.87	3698.16	4967.01	5616.97	6391.69	7086.11	7916.49	8921.54	10154.5	11676.8	13544	11458.7	13469.3	18542.8	20288.3	22433.3	24334.2	26635.2	29457.2	32969.1	37375.1	42875.4	1100.77	1280.82	1816.94	1936.98	2110.27	2301.81	2520.23	2772.11	3065.64	3407.73	3800.57	178.041	206.505	290.026	315.21	346.765	375.421	409.918	451.998	504.063	568.96	649.372	0	0
Zimbabwe	Zimbabwe	Africa	Africa	4081.06	2642.82	2113.73	2510.76	2964.09	3466	4206.71	5252.9	6598.67	8135.02	9705.83	16238	9625.6	7890.98	9068.81	10324	11697.9	13750.4	16687.9	20521.2	24967.7	29595	1559.9	915.311	773.208	865.824	967.223	1105.66	1300.5	1562.69	1883.08	2228.31	2558.8	252.302	147.575	123.422	140.898	159.362	180.074	210.846	254.648	311.478	376.971	444.62	0	0
Armenia	Armenia	Europe	Eurasia	1389.67	2556.71	2955.52	3857.17	5477.76	7688.53	10329.7	12976	15269.4	17100	18545.2	5072.53	8016.09	9389.7	13055.1	19588.9	28658.4	39919.5	51587.9	61854.8	69827	75460.9	1231.13	2112.23	2544.14	3320.3	4715.32	6618.38	8891.89	11169.9	13144	14719.9	15963.9	814.124	1336.48	1573.17	2088.92	2996.44	4205.71	5591.23	6856.72	7750.55	8180.08	8176.56	0	0
Azerbaijan	Azerbaijan	Asia-Pacific	Eurasia	5602.94	11038.8	22242.9	25262.2	29687.8	33845.4	38113.8	42796.3	48092.4	54046.8	60669.4	20451.7	34610.2	70665.7	85503.1	106166	126156	147293	170143	194818	220697	246865	4963.72	9119.75	19146.9	21746	25555.6	29134.5	32808.8	36839.6	41398.4	46524.1	52224.9	3282.42	5770.39	11839.5	13681.2	16239.8	18513.8	20630.2	22614.3	24411.1	25854.2	26749.1	0	0
Belarus	Belarus	Europe	Eurasia	11244.9	16748.8	22842.1	25569.3	28676	31511.4	34260.4	36997.4	39953.1	43361.8	47340.8	41045.8	52512.8	72569.5	86542.5	102547	117456	132401	147088	161846	177066	192631	9962.02	13837	19662.7	22010.4	24684.6	27125.4	29491.7	31847.8	34392	37326.3	40751.5	6587.71	8755.19	12158.5	13847.5	15686.3	17237.1	18544.4	19550	20279.7	20742.8	20872.5	0	0
Georgia	Georgia	Europe	Eurasia	2400.06	3379.24	3867.7	4566.79	5730.59	7041.07	8524.03	10145.9	11925.4	13910.4	16087.9	8760.6	10595	12287.7	15456.8	20493	26245.1	32941.5	40336.3	48308.7	56802.5	65462	2126.24	2791.76	3329.36	3931.14	4932.95	6061.03	7337.58	8733.66	10265.5	11974.2	13848.6	1406.05	1766.45	2058.71	2473.22	3134.74	3851.54	4613.88	5361.23	6053.19	6654.28	7093.14	0	0
Kazakhstan	Kazakhstan	Asia-Pacific	Eurasia	11013.4	17422.9	19780.3	24969.7	27766.7	29096.8	30284.8	31721.4	33816.3	36905.3	41267.7	70770.6	124711	164119	190098	197799	198082	197628	199367	205955	219323	241012	18457.8	29776.1	37349.4	41399.5	43570.7	45437.7	47340.9	49358.9	51609.2	54233	57406.3	5713.35	8669.73	10959.9	12452.1	13357.2	14118.9	14918.5	15774.5	16716.2	17772.2	18963.2	0	0
Kyrgyzstan	Kyrgyz Republic	Asia-Pacific	Eurasia	779.803	875.283	943.34	1120.99	1341.34	1574.15	1911.15	2419.5	3189.27	4332.45	5987.24	5010.93	6265.15	7826.98	8534.3	9555.22	10716.4	12471.5	15206.4	19423.9	25747.2	34966.8	1306.91	1495.88	1781.23	1858.6	1991.49	2136.6	2333.84	2620.22	3056.76	3738.63	4814.56	404.535	435.545	522.689	559.027	614.429	673.63	756.499	877.972	1060.65	1335.09	1738.89	0	0
Russian Federation	Russia	Europe	Eurasia	205228	213788	221786	230347	240135	250475	262679	276477	291420	306946	322335	678392	736976	874270	1.10068e+06	1.35366e+06	1.61038e+06	1.89633e+06	2.19292e+06	2.4774e+06	2.72593e+06	2.9159e+06	1.32077e+06	1.83821e+06	1.86423e+06	1.93619e+06	2.01846e+06	2.10537e+06	2.20796e+06	2.32393e+06	2.44954e+06	2.58004e+06	2.7094e+06	239100	229100	201300	253431	311679	370788	436628	504919	570420	627643	671383	0	0
Tajikistan	Tajikistan	Asia-Pacific	Eurasia	556.415	844.553	995.854	1399.02	2261.92	3785.08	6421.19	10338.4	15268.3	20718.8	26389.7	3575.46	6045.19	8262.7	10651	16113	25767.7	41902.4	64976.1	92989.9	123129	154122	932.52	1443.36	1880.39	2319.56	2705.12	3318.18	4423.53	6226.92	8804.73	12057.7	15822.5	288.649	420.254	551.787	697.675	858.408	1108.52	1572.94	2337.87	3416.59	4725.84	6138.79	0	0
Turkmenistan	Turkmenistan	Asia-Pacific	Eurasia	1827.25	2229.56	3129.36	4562.87	5082.46	5394.13	5735.93	6171.72	6776.86	7626.07	8788.79	11741.7	15958.9	25964.6	34737.9	36205.4	36721.6	37430.7	38788.9	41273.8	45320.8	51328.5	3062.37	3810.36	5908.9	7565.21	7965.13	8329.09	8723.93	9168.47	9692.09	10335.3	11151.8	947.915	1109.44	1733.93	2275.45	2442.17	2590.66	2756.56	2945.12	3164.23	3423.1	3729.56	0	0
Uzbekistan	Uzbekistan	Asia-Pacific	Eurasia	4597.04	5669.5	7182.81	9812.11	13571.5	18130.3	24034.7	31268.3	39679.7	49076.8	59403.4	29540.1	40581.5	59596.5	74701.1	96677.9	123426	156842	196520	241665	291657	346929	7704.38	9689.3	13562.7	16268.4	18115.7	20301.8	23272.7	27194.4	32168.6	38191.2	45196.7	2384.79	2821.17	3979.88	4893.19	5663.32	6555.19	7803.42	9466.85	11548.4	13972.3	16601.5	0	0
Albania	Albania	Europe	Europe	2496.04	3476.98	4168.53	4605.37	5676.41	6926.22	8344.69	9856.95	11423	13045.9	14735.2	9110.97	10901.4	13243.5	15587.4	20299.2	25817	32248.5	39187.7	46273.7	53272.3	59957.7	2211.28	2872.51	3588.32	3964.35	4886.31	5962.17	7183.2	8484.98	9833.08	11230.1	12684.2	1462.28	1817.54	2218.84	2494.11	3105.1	3788.71	4516.8	5208.57	5798.2	6240.73	6496.72	0	0
Andorra		Europe	Europe	367.609	472.192	469.782	356.221	361.236	365.815	369.297	375.526	386.812	404.107	427.304	1341.83	1480.47	1492.5	1205.67	1291.81	1363.55	1427.17	1492.95	1566.94	1650.15	1738.71	325.67	390.102	404.394	306.639	310.956	314.898	317.895	323.257	332.972	347.86	367.828	215.36	246.831	250.057	192.917	197.603	200.105	199.893	198.434	196.341	193.311	188.398	0	0
Austria	Austria	Europe	Europe	43117.2	47382	52866.4	60064.3	64257.1	68085.4	72126.9	76323.2	80963.3	86003.3	91439.7	104408	108390	114359	130981	141032	149765	158764	168156	178136	188733	199585	10646.6	10418.9	9257.63	9589.17	9604.4	9557.57	9482.72	9548.28	9619.49	9806.87	9984.13	9499.89	9579.12	10106.6	11326.8	11947.2	12442.5	12900.9	13323.3	13719.7	14083.3	14375.8	0	0
Belgium	Belgium	Europe	Europe	52541.8	58603.7	65075	69245.4	71694.4	73394.2	76271.3	80684.5	87156.5	95627.2	106019	127229	134061	140768	151003	157356	161443	167887	177765	191763	209853	231406	12973.7	12886.4	11395.5	11054.9	10716	10302.8	10027.6	10093.9	10355.3	10904.3	11576	11576.4	11847.8	12440.5	13058.2	13330	13412.7	13642.2	14084.6	14769.2	15659.2	16667.9	0	0
Bosnia and Herzegovina	Bosnia-Herzegovina	Europe	Europe	3654.83	4814.84	5389.57	5527	6210.33	7055.74	8173.95	9566.85	11207.7	13047.4	15013.3	13340.7	15096	17122.7	18706.8	22208.6	26299.7	31588.7	38034.4	45401.3	53278.3	61089.5	3237.86	3977.78	4639.4	4757.71	5345.93	6073.66	7036.23	8235.26	9647.69	11231.3	12923.6	2141.14	2516.88	2868.78	2993.24	3397.17	3859.56	4424.39	5055.28	5688.88	6241.43	6619.35	0	0
Bulgaria	Bulgaria	Europe	Europe	9924.19	13525.5	16576	18407.4	21298.7	24560.7	28146.1	31757.4	35291.2	38603.7	41658.8	24031.3	30940.6	35856.6	40140.7	46746.7	54025.3	61954.8	69968.4	77648.1	84715.3	90928.4	2450.5	2974.13	2902.69	2938.71	3183.48	3447.74	3700.45	3972.96	4193.06	4401.94	4548.64	2186.57	2734.41	3168.87	3471.24	3960.02	4488.44	5034.32	5543.72	5980.29	6321.44	6549.45	0	0
Croatia	Croatia	Europe	Europe	10722.8	13611.7	13222	12768.4	13717.4	14550.3	15443.5	16428.2	17548.2	18861.7	20401.7	39139.9	42677.1	42006.5	43216.2	49054.4	54235.1	59682.4	65312.6	71086.3	77020.7	83014.9	9499.45	11245.4	11381.7	10991.2	11808.1	12525	13294	14141.6	15105.7	16236.3	17562	6281.82	7115.33	7037.86	6914.94	7503.67	7959.15	8359.27	8680.93	8907.28	9022.8	8995.08	0	0
Cyprus	Cyprus	Europe	Europe	3924.62	4873.27	5461.18	5226.96	5930.34	6795.19	7899.07	9152.3	10466.8	11754.4	13014.1	9503.42	11148	11813.4	11398.4	13016	14947.1	17387.3	20164.5	23029.1	25794.8	28405.8	969.077	1071.59	956.327	834.476	886.398	953.883	1038.51	1144.98	1243.59	1340.34	1420.98	864.702	985.219	1044.03	985.694	1102.61	1241.81	1412.86	1597.67	1773.65	1924.81	2046.03	0	0
Czech Republic	Czech Republic	Europe	Europe	29889.8	36755.1	43304.9	47646.1	52426.1	57047.4	61829.1	66707.8	72088.8	78036.3	84617.2	72377.6	84080.5	93675.6	103901	115066	125485	136097	146972	158611	171250	184694	7380.44	8082.13	7583.28	7606.62	7836.05	8008.09	8128.83	8345.37	8565.09	8898.39	9239.19	6585.53	7430.71	8278.69	8985.04	9747.48	10425.3	11059	11644.8	12215.8	12778.6	13303.2	0	0
Denmark	Denmark	Europe	Europe	30861.9	33429.3	34995.6	36400.4	37708.3	38824.5	40251.4	42081.4	44586.3	47833.5	51967.9	74731.8	76472.4	75701.4	79377.8	82762.6	85400.8	88600.6	92714.4	98099.2	104970	113430	7620.5	7350.81	6128.22	5811.27	5636.19	5450.03	5291.96	5264.53	5297.43	5454.4	5674.27	6799.73	6758.34	6690.2	6864.34	7011.01	7095.13	7199.51	7345.92	7555.39	7832.85	8170.21	0	0
Estonia	Estonia	Europe	Europe	2968	4231.91	4335.79	5202.61	5222.96	5216.95	5267.34	5411.38	5704.07	6153.89	6765.1	7186.98	9680.86	9379.04	11345.3	11463.4	11475.5	11594.4	11922.4	12550.2	13504.6	14766.1	732.866	930.56	759.257	830.589	780.667	732.335	692.512	676.982	677.718	701.721	738.668	653.932	855.557	828.884	981.102	971.094	953.391	942.136	944.635	966.586	1007.71	1063.59	0	0
Faroe Islands		Europe	Europe	0	0	0	0	0	0	0	0	0	0	0	0	0	0	0	0	0	0	0	0	0	0	0	0	0	0	0	0	0	0	0	0	0	0	0	0	0	0	0	0	0	0	0	0	0	0
Finland	Finland	Europe	Europe	24775.6	28525.2	31028.6	32859.2	36463.5	40436.7	44931.2	49599.1	54303.6	58871.9	63360.6	59993.8	65253.9	67119.9	71655.6	80030.6	88947	98901.6	109277	119480	129194	138297	6117.65	6272.45	5433.53	5245.92	5450.13	5676.34	5907.22	6205.01	6451.98	6713.1	6918.22	5458.74	5766.89	5931.8	6196.55	6779.57	7389.75	8036.55	8658.24	9202.05	9640.42	9961.34	0	0
France	France	Europe	Europe	286353	313131	339190	366749	394396	420825	451955	488923	533412	584453	642121	693400	716314	733724	799764	865626	925673	994835	1.0772e+06	1.17362e+06	1.28258e+06	1.40155e+06	70707	68854.8	59396.8	58550.9	58949.7	59073.7	59419.7	61165.8	63376.3	66644.6	70112	63091.4	63305.1	64843.7	69161	73329.2	76905.2	80838.3	85348.5	90389.7	95705.7	100952	0	0
Germany	Germany	Europe	Europe	419936	432891	479590	531595	551880	569125	589814	614702	645796	681420	720662	1.01687e+06	990276	1.03743e+06	1.15924e+06	1.21127e+06	1.25188e+06	1.29829e+06	1.35432e+06	1.42089e+06	1.49537e+06	1.57298e+06	103692	95189	83982.9	84868.4	82488.6	79891.6	77544.5	76901.2	76729	77701.7	78687.7	92523.4	87516.8	91684.4	100248	102610	104007	105496	107305	109434	111584	113300	0	0
Gibraltar	Gibraltar and Malta	Europe	Europe	0	0	0	0	0	0	0	0	0	0	0	0	0	0	0	0	0	0	0	0	0	0	0	0	0	0	0	0	0	0	0	0	0	0	0	0	0	0	0	0	0	0	0	0	0	0
Greece	Greece	Europe	Europe	38141.3	46378.5	47814.4	40223.3	40202.2	40154.9	40901.9	42707.1	45903.8	50513.4	56512.3	92358.7	106095	103431	87714.3	88236.4	88327.2	90032.5	94092.9	100998	110851	123349	9417.94	10198.2	8372.97	6421.58	6008.96	5636.79	5377.48	5342.8	5453.97	5760	6170.47	8403.57	9376.24	9140.79	7585.25	7474.71	7338.25	7315.86	7455.14	7778.65	8271.7	8884.68	0	0
Greenland		Americas	Europe	0	0	0	0	0	0	0	0	0	0	0	0	0	0	0	0	0	0	0	0	0	0	0	0	0	0	0	0	0	0	0	0	0	0	0	0	0	0	0	0	0	0	0	0	0	0
Hungary	Hungary	Europe	Europe	25187.1	31474.6	32524.6	36559.7	43188.2	49007.2	54117.8	58456.8	62484.8	66470.6	70744.9	60990.2	72000.9	70356.1	79725.2	94790	107799	119123	128793	137480	145869	154414	6219.25	6921	5695.5	5836.7	6455.26	6879.44	7115.02	7313.13	7424.01	7579.57	7724.5	5549.4	6363.17	6217.8	6894.38	8029.88	8956.01	9679.72	10204.5	10588.4	10884.7	11122.3	0	0
Iceland	Iceland	Europe	Europe	1465.81	1861.86	1896.18	2058.05	2192.24	2303.81	2419.74	2545.49	2691.14	2865.25	3069.06	5350.45	5837.5	6024.17	6965.71	7839.62	8587.28	9351.21	10120	10901.5	11700.1	12488.1	1298.58	1538.17	1632.25	1771.59	1887.11	1983.15	2082.94	2191.19	2316.56	2466.44	2641.88	858.729	973.257	1009.3	1114.57	1199.2	1260.21	1309.75	1345.08	1365.99	1370.64	1353.14	0	0
Ireland	Ireland	Europe	Europe	21220.6	27816.5	30251.3	37857.9	41816.5	44779.3	47320.7	49881.3	52889.9	56336.3	60205.4	51385.3	63632.6	65438.6	82556.1	91779.5	98499.4	104161	109899	116369	123629	131410	5239.83	6116.6	5297.42	6043.95	6250.25	6285.94	6221.38	6240.31	6284.01	6423.97	6573.71	4675.47	5623.61	5783.21	7139.19	7774.86	8183.36	8463.95	8707.49	8962.49	9225.21	9465.29	0	0
Isle of Man		Europe	Europe	0	0	0	0	0	0	0	0	0	0	0	0	0	0	0	0	0	0	0	0	0	0	0	0	0	0	0	0	0	0	0	0	0	0	0	0	0	0	0	0	0	0	0	0	0	0
Italy	Italy	Europe	Europe	285848	305986	312377	294597	288086	279996	275815	277414	286938	304803	331837	692178	699969	675722	642422	632294	615896	607119	611203	631325	668886	724299	70582.3	67283.6	54701.4	47031.9	43059.7	39304.7	36262.2	34705.4	34092	34756.3	36232.7	62980.2	61860.5	59717.7	55554.7	53563.1	51168.8	49333.3	48426.7	48623.3	49912.2	52170.3	0	0
Latvia	Latvia	Europe	Europe	3614.18	5393.7	5512.15	6580.57	6768.2	6949.84	7217.96	7609.33	8186.85	8952.27	9913.37	8751.68	12338.6	11923.7	14350.2	14854.9	15287.3	15888	16765	18012.8	19645.7	21637.9	892.421	1186.03	965.254	1050.58	1011.63	975.592	948.964	951.952	972.705	1020.82	1082.42	796.302	1090.43	1053.77	1240.96	1258.4	1270.08	1291.03	1328.32	1387.31	1465.96	1558.55	0	0
Lithuania	Lithuania	Europe	Europe	5812.31	8582.97	9515.73	11189.8	11132.2	11102	11229.7	11536.1	12116.9	13010.4	14259.8	14074.4	19634.3	20584.1	24401.5	24433.1	24420.7	24718.5	25416.5	26659.8	28551.1	31124.8	1435.19	1887.32	1666.34	1786.44	1663.91	1558.46	1476.39	1443.2	1439.65	1483.56	1557	1280.61	1735.2	1819.14	2110.17	2069.78	2028.88	2008.58	2013.79	2053.28	2130.48	2241.88	0	0
Luxembourg	Luxembourg	Europe	Europe	4882.08	5634.19	6761.07	8230.89	8681.01	8928.21	9056.5	9190.12	9398.75	9699.53	10117.8	11821.9	12888.7	14625.3	17949	19053.2	19639.1	19935	20247.8	20679.2	21285.5	22084	1205.49	1238.91	1183.96	1314.05	1297.54	1253.31	1190.68	1149.71	1116.69	1106.03	1104.74	1075.65	1139.05	1292.53	1552.17	1614.04	1631.62	1619.88	1604.27	1592.67	1588.32	1590.68	0	0
Macedonia Republic	Former Yugoslav Republic of Macedonia	Europe	Europe	2713.59	3094.08	3601.2	3689.81	4102.1	4673.74	5489.14	6554.03	7825.98	9234.17	10708.4	9905.04	9700.9	11441	12488.6	14669.4	17421	21213.1	26056.4	31702.3	37707.3	43572.8	2404.01	2556.18	3099.95	3176.23	3531.13	4023.21	4725.11	5641.78	6736.69	7948.88	9217.92	1589.73	1617.38	1916.86	1998.28	2243.93	2556.59	2971.16	3463.25	3972.38	4417.32	4721.32	0	0
Malta		Europe	Europe	1387.34	1423.19	1686.05	1852.07	2081.3	2305.61	2540.03	2769.52	2999.87	3233.55	3487.2	3359.42	3255.68	3647.2	4038.79	4568.07	5071.57	5591.07	6101.84	6600.35	7095.99	7611.49	342.565	312.948	295.25	295.681	311.088	323.653	333.945	346.476	356.424	368.718	380.76	305.669	287.724	322.325	349.262	386.972	421.348	454.319	483.459	508.345	529.502	548.246	0	0
Mauritius	Mauritius	Africa	Europe	1741.57	1917.16	2119.98	2068.05	2187.41	2256.1	2306.45	2343.16	2370.85	2393.25	2413.08	6929.48	6982.61	7914.32	7469.74	7800.23	7988.26	8127.78	8230.85	8309.7	8374.53	8432.97	665.677	663.986	775.495	713.156	739.855	758.801	772.045	781.246	787.836	792.869	797.043	107.668	107.054	123.787	116.054	120.916	123.75	125.842	127.379	128.548	129.503	130.357	0	0
Montenegro	Montenegro	Europe	Europe	939.89	1104.79	1313.9	1376.01	1491.41	1597.29	1718.86	1865.93	2047.3	2274.24	2555.55	3430.75	3463.85	4174.27	4657.26	5333.4	5953.78	6642.64	7418.27	8293.41	9286.73	10398.6	832.662	912.719	1131.02	1184.48	1283.83	1374.96	1479.62	1606.22	1762.34	1957.69	2199.84	550.624	577.51	699.367	745.2	815.831	873.734	930.385	985.988	1039.18	1087.92	1126.74	0	0
Netherlands	the Netherlands	Europe	Europe	92593.2	100524	111791	117975	122662	126208	130299	135202	141554	149362	158988	224213	229958	241822	257267	269221	277615	286813	297879	311448	327773	347022	22863.3	22104.4	19576.1	18834.5	18334.1	17716.6	17130.8	16914.2	16818.4	17031.6	17359.6	20400.8	20322.8	21371.3	22247.6	22806.3	23064.4	23305.8	23601.5	23987.1	24458.4	24995.6	0	0
Norway	Norway	Europe	Europe	40810.4	47067.1	47181.8	53635.2	54781.3	54118	53249.1	52603.8	52624.7	53654.2	55821.4	148965	147570	149897	181535	195902	201721	205784	209134	213178	219094	227139	36154.5	38884.5	40614.6	46169.8	47156.3	46585.4	45837.4	45281.9	45299.9	46186.2	48051.7	23908.3	24603.6	25114.1	29047.1	29966.4	29603.1	28822.6	27796.7	26711.7	25666.4	24611.6	0	0
Poland	Poland	Europe	Europe	78128.2	91795.6	121362	147325	172549	195300	215925	233850	250400	266180	282189	189186	209990	262527	321269	378713	429593	475289	515221	550934	584129	615933	19291.6	20185	21252.2	23520.2	25790.6	27415.4	28388.2	29255.4	29750.8	30352.2	30811.7	17213.8	18558.1	23201.1	27782.3	32081.7	35690.8	38621.1	40821.9	42431.8	43587.6	44364.9	0	0
Portugal	Portugal	Europe	Europe	37266.6	39378	42514	40315.3	40542.1	40768.6	41678.7	43448.4	46311.5	50230.7	55287	90240.5	90080.6	91964.8	87914.9	88982.4	89677.1	91742.5	95726.1	101895	110231	120675	9201.94	8658.88	7444.79	6436.27	6059.76	5722.93	5479.62	5435.53	5502.41	5727.75	6036.68	8210.84	7960.98	8127.5	7602.61	7537.9	7450.41	7454.81	7584.54	7847.74	8225.4	8692.04	0	0
Republic of Moldova		Europe	Europe	1514.28	2208.87	2456.78	3036.1	3770.99	4652.88	5735.34	7028.76	8542.46	10288.6	12248.6	5527.36	6925.48	7805.22	10276	13485.3	17343.3	22164.5	27943.8	34604.7	42013	49840	1341.52	1824.86	2114.83	2613.51	3246.11	4005.25	4937.05	6050.44	7353.45	8856.53	10543.8	887.123	1154.65	1307.7	1644.25	2062.8	2545.17	3104.42	3714.11	4336.05	4921.72	5400.41	0	0
Romania	Romania	Europe	Europe	31450.1	42932.6	51652.7	58479.8	69194.3	82089	96386.9	109954	121644	130874	138246	76156	98212.1	111733	127526	151869	180568	212165	242251	267644	287202	301748	7765.73	9440.51	9045.1	9336.21	10342.4	11523.3	12672.2	13755.6	14453	14923.5	15094.8	6929.31	8679.6	9874.56	11028.1	12865.1	15001.7	17240.1	19194	20613.3	21431	21734.5	0	0
Serbia	Serbia	Europe	Europe	11339.2	15543.3	17076.4	16954.8	17827.2	18784.4	20125.6	21947.7	24351.6	27446.5	31304.4	41390	48733.1	54252	57385.5	63751.2	70017.3	77776.5	87256.2	98646.1	112076	127378	10045.6	12841.1	14699.6	14594.9	15345.8	16169.8	17324.4	18892.8	20962.1	23626.2	26947.2	6642.96	8125.03	9089.5	9182.15	9751.8	10275.2	10893.6	11597.5	12360.6	13129.5	13802.1	0	0
Slovakia	Slovak Republic	Europe	Europe	11383.3	14745.6	19425.9	21436.2	21871.3	22175.6	22670.4	23465.4	24780.1	26705.4	29321.1	27564.4	33731.8	42021.5	46745.6	48003.5	48778.9	49901.8	51699.3	54521.5	58604.8	63999	2810.78	3242.43	3401.75	3422.26	3269.07	3112.93	2980.54	2935.6	2944.2	3045.19	3201.51	2508.04	2981.09	3713.7	4042.41	4066.48	4052.56	4054.92	4096.22	4199.13	4373.08	4609.76	0	0
Slovenia	Slovenia	Europe	Europe	4202.95	5466.83	7374.16	8167.69	8349.71	8477.54	8697.13	9065.06	9664.34	10516.2	11639.6	10177.4	12505.8	15951.5	17811.2	18326.1	18647.7	19144	19972.3	21263.6	23077.6	25405.7	1037.8	1202.11	1291.32	1303.96	1248.02	1190.04	1143.44	1134.07	1148.25	1199.15	1270.91	926.023	1105.22	1409.73	1540.25	1552.44	1549.26	1555.6	1582.44	1637.68	1722.05	1829.94	0	0
Spain	Spain	Europe	Europe	173074	205646	225319	243824	254769	262591	271520	283542	299717	319994	344451	419096	470433	487402	531703	559171	577612	597666	624703	659440	702224	751830	42735.7	45219.7	39456.4	38926.1	38079.9	36861.5	35697.5	35472	35610.3	36488.6	37609.9	38132.8	41575	43074.7	45980	47368.7	47988.2	48565.2	49496.3	50788.7	52399.9	54153.4	0	0
Sweden	Sweden	Europe	Europe	45293.6	52249.4	59012.8	66102.5	74924.7	84491.3	94748.4	105005	115410	125922	136742	109678	119525	127654	144149	164446	185852	208558	231348	253926	276335	298465	11184	11489.2	10333.9	10553.2	11198.9	11860.6	12456.8	13136.5	13712.2	14358.8	14930.5	9979.41	10563.2	11281.6	12465.5	13930.6	15440.7	16947	18330.1	19556.9	20620.1	21498.1	0	0
Switzerland	Switzerland	Europe	Europe	54441.2	60574	65018.9	69946.6	70860.7	70270.2	69804	69907	71050.9	73592	77662.4	198719	189918	206566	236743	253403	261927	269761	277925	287821	300509	316010	48230.2	50043.2	55969	60210.9	60997.7	60489.4	60088	60176.7	61161.4	63348.8	66852.7	31893.8	31664.1	34608.5	37880.8	38762.2	38438.5	37783.4	36940	36064.6	35204	34241.2	0	0
Turkey	Turkey	Europe	Europe	22250.2	33880.4	57482.7	58967.3	77480.2	98597.9	124321	154991	192063	238305	296015	117059	158530	224742	223726	287727	360421	448845	553689	679281	833819	1.02247e+06	5849.86	6713.57	7498.88	7335.91	9295.78	11544.7	14307.4	17707.7	22040.5	27837.8	35757.2	2547.61	3136.33	3260.43	3190.09	4028.86	4951.93	6030.52	7248.53	8626.96	10215.5	11996.8	0	0
Ukraine	Ukraine	Europe	Europe	36289.8	54426.2	54872.5	59543.7	69345.1	81859.9	97872.5	117007	138597	161861	185940	132464	170643	174330	201533	247983	305127	378233	465177	561444	660952	756592	32149.6	44964.2	47234.9	51255.9	59693	70465.9	84249.8	100721	119306	139332	160059	21260	28450.4	29207.7	32246.9	37933.1	44778.2	52976.4	61828.2	70350.3	77429	81980.5	0	0
United Kingdom	United Kingdom	Europe	Europe	268539	311730	332555	380624	444210	517465	598250	678194	753688	822006	884532	650263	713108	719372	830022	974959	1.13825e+06	1.31686e+06	1.49421e+06	1.65827e+06	1.80388e+06	1.93066e+06	66308.2	68546.6	58235	60766.1	66395.3	72639.8	78653.5	84844.3	89547.9	93732.5	96580.4	59166.4	63021.8	63575.3	71777.7	82591	94566.1	107005	118389	127717	134606	139063	0	0
Europe Remaining				430766	510763	555863	594242	631118	663170	699062	740185	790211	850032	920672	1.20611e+06	1.30142e+06	1.36979e+06	1.50824e+06	1.63818e+06	1.74487e+06	1.85931e+06	1.986e+06	2.12982e+06	2.29299e+06	2.47288e+06	189968	205815	208686	217223	223492	227031	231588	239258	249990	265261	284417	142320	152292	161174	173191	182411	188402	193925	199232	204539	209631	213699	0	0
Afghanistan	Afghanistan	Asia-Pacific	India_SAARC	1744.83	2056.26	2876.7	3493.27	4210.52	5125.57	6784.77	9891.63	15641.3	25744.7	41966.2	11212.1	14718.4	23868.2	26594.8	29994.1	34893.3	44275	62168.4	95261.7	152998	245092	2924.24	3514.19	5431.82	5791.82	6217.38	6732.91	7569.35	9081.86	11996.8	17634.2	27960.1	905.159	1023.21	1593.93	1742.06	1919.47	2129.79	2481.22	3122.77	4342.57	6611.48	10486.9	0	0
Bangladesh	Bangladesh	Asia-Pacific	India_SAARC	16390.6	19983.5	22994.6	28921.7	35904.9	43631.3	54307.6	69237.8	90162.8	119253	159034	105324	143039	190789	220186	255772	297028	354392	435156	549127	708708	928795	27469.8	34152.2	43418.8	47952	51865.8	56237	62165.5	70488.1	82501.3	100132	126197	8502.91	9943.88	12740.9	14422.9	16054.5	17837.9	20328.8	23858.9	28886	35982	45764.2	0	0
Bhutan	Bhutan	Asia-Pacific	India_SAARC	153.945	214.357	289.011	348.689	428.935	499.305	577.316	668.172	779.673	921.758	1105.82	989.232	1534.34	2397.95	2654.62	3055.57	3399.12	3767.36	4199.43	4748.52	5477.88	6458.25	258.003	366.341	545.714	578.123	623.835	668.909	721.486	784.122	860.782	957.415	1082.91	79.8612	106.665	160.136	173.887	192.944	211.333	233.423	259.991	292.071	330.963	378.061	0	0
India	India	Asia-Pacific	India_SAARC	360638	556836	942888	1.62613e+06	2.47581e+06	3.28396e+06	4.20415e+06	5.19682e+06	6.51096e+06	7.89585e+06	9.27854e+06	1.97568e+06	2.59317e+06	3.61872e+06	5.71732e+06	8.03842e+06	9.937e+06	1.19491e+07	1.33828e+07	1.5595e+07	1.89687e+07	2.39294e+07	316076	454674	669162	993244	1.30287e+06	1.51527e+06	1.68707e+06	1.81548e+06	2.00628e+06	2.20637e+06	2.46032e+06	434190	535278	776131	1.19954e+06	1.64556e+06	1.98416e+06	2.31235e+06	2.49017e+06	2.7624e+06	3.15717e+06	3.67794e+06	0	0
Maldives	Maldives	Asia-Pacific	India_SAARC	169.86	175.81	216.346	257.418	291.159	314.551	342.284	379.927	433.782	509.446	611.583	1091.5	1258.43	1795.04	1959.76	2074.1	2141.37	2233.63	2387.82	2641.9	3027.57	3571.78	284.675	300.464	408.508	426.797	451.013	473.668	499.389	530.348	569.792	621.828	691.436	88.1174	87.4842	119.874	128.371	138.467	147.709	158.516	171.648	188.154	209.097	235.221	0	0
Nepal	Nepal	Asia-Pacific	India_SAARC	2773.18	3117.71	3320.41	3858.15	4643.49	5653.99	7299.34	9939.8	14070.8	20286.6	29141.8	17820.2	22316.2	27549.8	29372.7	33078.5	38490.7	47632.9	62471.1	85696.7	120561	170194	4647.7	5328.24	6269.65	6396.78	6864.24	7433.23	8291.99	9651.91	11865.9	15472.1	21191.3	1438.63	1551.39	1839.79	1924.02	2118.89	2351.03	2711.84	3288.66	4215.16	5666.54	7812.99	0	0
Pakistan	Pakistan	Asia-Pacific	India_SAARC	36728.1	44592.9	45203.2	51286.2	60772.1	71728.8	88964	116281	158590	221321	309510	236011	319190	375055	390450	432917	488308	580547	730821	965874	1.31528e+06	1.80761e+06	61554.3	76210.2	85353.3	85032.1	90889.6	97597.2	107234	121957	145244	182152	239365	19053.3	22189.6	25046.3	25575.8	28017.8	30754.3	34803.3	41048	50793	65647.6	87119.9	0	0
Sri Lanka	Sri Lanka	Asia-Pacific	India_SAARC	7765.03	9073.62	10426.1	13258.8	15798.6	17813.8	19922.9	22223.6	24850.8	27944.8	31679.9	49897.2	64947.7	86506.2	100941	112543	121271	130010	139674	151351	166072	185017	13013.7	15507	19686.7	21982.9	23529.9	25002.2	26645	28488.7	30568.9	32917.2	35585.8	4028.23	4515.08	5776.92	6611.99	7256.93	7857.58	8547.82	9329.84	10200.3	11145.5	12147	0	0
Algeria	Algeria	Africa	MENA	40794.9	50721	50667.7	50243.4	54582.7	57822.6	60904.5	63752.4	66329.9	68635.8	70682.9	162318	184734	189153	181478	193492	202361	210901	218897	226239	232913	238943	15593	17566.6	18534.4	17326.2	18296.8	19190.4	20001.1	20714.8	21328.4	21846.6	22277.3	2522.05	2832.26	2958.51	2819.53	2996.28	3129.97	3258.01	3377.24	3486.09	3584.39	3672.55	0	0
Bahrain	Bahrain	Asia-Pacific	MENA	814.263	1276.27	2425.45	2310.02	2819.29	3303.9	3805.67	4359.87	5026.08	5854.08	6896.48	4283.85	5971.82	9482.86	8764.38	10469.6	12077.3	13739.9	15575.2	17776	20483.1	23821.3	214.08	252.899	316.411	287.381	338.248	386.851	437.974	498.115	576.775	683.849	833.061	93.2317	118.145	137.572	124.97	146.599	165.933	184.604	203.9	225.758	250.948	279.498	0	0
Egypt	Egypt	Africa	MENA	13962.5	20240.3	39605.5	37104.2	58701	94913.2	152227	232620	333072	449504	581066	73456.8	94706.9	154847	140776	217989	346951	549594	831009	1.178e+06	1.57279e+06	2.00707e+06	3670.91	4010.72	5166.72	4615.99	7042.72	11113.3	17518.9	26576.8	38222.1	52509.1	70190	1598.68	1873.66	2246.43	2007.31	3052.37	4766.87	7384.17	10879	14960.7	19269	23549.2	0	0
Iran	Iran	Africa	MENA	21197.6	33771.1	62161.6	49632.8	63186.1	78510.9	96590.7	118818	147772	186288	236113	111521	158019	243035	188310	234645	286993	348728	424466	522635	651814	815565	5573.11	6691.91	8109.26	6174.64	7580.84	9192.76	11116.1	13575	16957.8	21761.4	28521.4	2427.09	3126.21	3525.82	2685.09	3285.59	3943.09	4685.4	5556.83	6637.53	7985.67	9569.11	0	0
Iraq	Iraq	Asia-Pacific	MENA	7759.29	9697.98	18696.7	19065.2	27949.9	39778.4	55763.4	77410.3	107300	149410	208581	40821.7	45378	73099	72334.9	103794	145408	201327	276540	379493	522779	720465	2040.01	1921.7	2439.07	2371.84	3353.33	4657.61	6417.52	8844.12	12313.3	17453.5	25195.6	888.425	897.749	1060.48	1031.41	1453.36	1997.81	2704.96	3620.28	4819.62	6404.8	8453.3	0	0
Israel	Israel	Asia-Pacific	MENA	4250.22	5740.81	10515.5	9945.55	12852	15975.1	19407.3	23283	27999.4	34122.6	42173.2	22360.5	26861.9	41112.6	37734.1	47726.5	58396.3	70067.5	83176.2	99027.1	119393	145671	1117.43	1137.57	1371.79	1237.29	1541.93	1870.51	2233.48	2660.09	3213.11	3986.06	5094.32	486.643	531.431	596.44	538.046	668.284	802.323	941.403	1088.89	1257.66	1462.74	1709.18	0	0
Jordan	Jordan	Asia-Pacific	MENA	991.977	1633.21	3506.16	3449.18	4504.44	5635.05	7160.28	9234.85	12030.5	15932.7	21382.1	5218.8	7641.98	13708.1	13086.5	16727.5	20598.7	25851.3	32990.5	42549	55747.8	73856.5	260.803	323.629	457.394	429.101	540.426	659.802	824.039	1055.08	1380.58	1861.19	2582.86	113.58	151.187	198.87	186.598	234.224	283.011	347.329	431.89	540.378	682.992	866.567	0	0
Kuwait	Kuwait	Asia-Pacific	MENA	3877.28	7012.89	10775.1	10774.3	13436.2	15781.3	17934	19940.9	22197.5	25015.4	28566.9	20398.4	32814.1	42127.6	40878.5	49896.1	57687.9	64748.4	71236.8	78507.1	87527.8	98673.6	1019.38	1389.64	1405.66	1340.39	1612.02	1847.82	2063.93	2278.25	2547.3	2922.2	3450.74	443.941	649.188	611.165	582.882	698.663	792.591	869.938	932.584	997.052	1072.34	1157.75	0	0
Lebanon	Lebanon	Asia-Pacific	MENA	1079.14	1610.61	3373.92	3880.91	4800.2	5373.17	6419.61	8058.56	10094.9	12702.6	16040.6	5677.38	7536.25	13191.1	14724.4	17825.8	19641.4	23177.2	28788.4	35703.2	44445.6	55406.3	283.719	319.151	440.143	482.809	575.91	629.139	738.799	920.69	1158.45	1483.86	1937.63	123.56	149.096	191.369	209.954	249.604	269.859	311.401	376.878	453.435	544.523	650.089	0	0
Libya	Libya	Africa	MENA	15202.8	18568.9	19906.6	9004	10416.5	11349.5	12064.3	12579.2	12948.8	13223.2	13436.1	60489.9	67631.1	74315.5	32522.2	36433	38987.1	40967.7	42413.4	43466.2	44260.3	44887.7	5810.93	6431.13	7281.9	3104.98	3420.92	3678.27	3866.29	3995.33	4083.32	4144.98	4189.79	939.875	1036.89	1162.36	505.282	562.813	601.316	631.011	652.567	668.176	679.872	689.044	0	0
Morocco	Morocco	Africa	MENA	16787.2	20273.6	22716.1	23371.7	25668.9	27358.9	28941.6	30408.4	31783.4	33103.4	34398	66794.1	73839.8	84803.8	84417.8	90778.3	95404.4	99790.1	103909	107825	111645	115459	6416.54	7021.52	8309.62	8059.6	8573.44	9039.57	9455.89	9823.51	10150.8	10447.5	10719.9	1037.83	1132.07	1326.41	1311.56	1405.13	1474.87	1540.62	1602.03	1660.09	1716.36	1772.12	0	0
Oman	Oman	Asia-Pacific	MENA	2695.88	3430.61	6588.43	6567.39	8596.68	10824.7	13260.2	15876.5	18844.1	22444.1	26902	14183	16052.2	25759	24917.1	31924.3	39569.1	47874.3	56717.1	66647.2	78530.8	92922.8	708.779	679.793	859.49	817.025	1031.4	1267.45	1526.05	1813.89	2162.49	2621.82	3249.63	308.674	317.574	373.697	355.29	447.015	543.652	643.222	742.503	846.429	962.116	1090.27	0	0
Qatar	Qatar	Asia-Pacific	MENA	1755.8	3167.49	10772	11518.4	13223.4	14478.9	15314.8	15979.2	16772	17903.8	19462.5	9237.27	14821	42115.6	43701.8	49105.7	52926.9	55292.2	57083.9	59318.5	62644.7	67225.7	461.621	627.654	1405.26	1432.97	1586.49	1695.32	1762.5	1825.62	1924.69	2091.45	2350.97	201.036	293.217	610.99	623.139	687.595	727.179	742.888	747.304	753.353	767.489	788.767	0	0
Saudi Arabia	Saudi Arabia	Asia-Pacific	MENA	20443.9	31646.4	59399	162522	185320	202115	215471	227048	240085	257290	279700	107555	148077	232234	616622	688195	738824	777932	811105	849122	900244	966117	5374.94	6270.89	7748.87	20218.8	22233.9	23665.5	24797.5	25940.2	27551.3	30055.5	33786.4	2340.79	2929.53	3369.12	8792.33	9636.35	10150.9	10452	10618.5	10784	11029.3	11335.6	0	0
Syria	Syria	Asia-Pacific	MENA	1886.55	2549.36	4457.78	4214.97	6975.68	12244.3	19536.2	28981.4	41980.9	59631.8	83016.3	9925.14	11928.7	17428.7	15991.9	25904.6	44758.6	70532.9	103533	148476	208649	286748	495.996	505.168	581.537	524.369	836.916	1433.68	2248.32	3311.13	4817.58	6965.94	10028	216.006	235.996	252.846	228.027	362.725	614.952	947.657	1355.39	1885.67	2556.25	3364.45	0	0
Tunisia	Tunisia	Africa	MENA	9672.42	11041.9	12216.1	11367.5	12388.3	13100.6	13722.3	14255	14717.8	15133.4	15517.3	38485.3	40216.6	45605.1	41059.1	43885.4	45835.4	47558.1	49053.6	50372.1	51574.8	52705.6	3697.07	3824.25	4468.68	3920.02	4148.35	4344.83	4508.36	4641.85	4752.05	4845.43	4926.2	597.975	616.581	713.304	637.916	679.494	708.889	734.716	757.017	776.564	794.279	810.811	0	0
United Arab Emirates	United Arab Emirates	Asia-Pacific	MENA	8842.04	13991	22851.5	22562.6	27466.2	32270.3	37027	41990.2	47639.6	54458.3	62719.2	46518.1	65465.7	89343.1	85604.1	101997	117963	133681	150006	168490	190547	216640	2324.68	2772.39	2981.08	2806.93	3295.29	3778.5	4261.24	4797.38	5466.95	6361.59	7576.18	1012.4	1295.16	1296.14	1220.62	1428.2	1620.73	1796.09	1963.77	2139.84	2334.48	2541.86	0	0
Yemen	Yemen	Asia-Pacific	MENA	1903.55	2850.94	4932.51	3807.39	4990.14	6666.59	9353.92	13911.1	21976.7	36275.8	60460.8	10014.6	13339.9	19284.8	14445.5	18531.2	24369.5	33771.1	49695.9	77726.2	126927	208839	500.466	564.929	643.468	473.664	598.698	780.585	1076.49	1589.34	2521.96	4237.59	7303.37	217.953	263.914	279.773	205.977	259.48	334.819	453.737	650.586	987.134	1555.04	2450.33	0	0
Remaining MENA				97921.8	124477	153463	142432	163289	181004	198935	217728	238744	264071	295458	409446	478121	581374	523284	588264	643486	699967	759841	827431	909167	1.00957e+06	35583.3	39573.9	44850.7	38437.7	41665.9	44610	47418.4	50227.2	53278	56934.9	61612.3	6868.39	7827.64	8880.68	7895.17	8775.7	9499.59	10205.1	10912.8	11665	12518.1	13486.6	0	0
Anguilla		Americas	N America	108.524	122.415	142.45	150.719	165.498	179.638	199.95	226.343	257.313	291.146	327.541	606.263	718.663	845.718	839.891	878.992	921.637	993.532	1092.25	1209.24	1335.97	1470.88	43.3793	46.2704	43.376	42.4451	44.0677	46.1882	49.689	54.4929	60.2628	66.7262	74.0369	5.01246	5.28482	4.76269	4.64335	4.7819	4.95039	5.25867	5.68396	6.17096	6.66567	7.14995	0	0
Antigua and Barbuda	Antigua and Barbuda	Americas	N America	108.524	122.415	142.45	150.719	165.498	179.638	199.95	226.343	257.313	291.146	327.541	606.263	718.663	845.718	839.891	878.992	921.637	993.532	1092.25	1209.24	1335.97	1470.88	43.3793	46.2704	43.376	42.4451	44.0677	46.1882	49.689	54.4929	60.2628	66.7262	74.0369	5.01246	5.28482	4.76269	4.64335	4.7819	4.95039	5.25867	5.68396	6.17096	6.66567	7.14995	0	0
Bahamas	Bahamas	Americas	N America	557.017	578.705	655.913	667.675	680.766	680.364	710.853	792.38	934.456	1125.33	1339.39	3111.73	3397.41	3894.13	3720.66	3615.67	3490.62	3532.15	3823.75	4391.48	5163.72	6014.8	222.651	218.739	199.726	188.029	181.27	174.934	176.652	190.768	218.85	257.907	302.754	25.7272	24.9835	21.9299	20.5697	19.67	18.7492	18.6954	19.8984	22.4104	25.7639	29.2378	0	0
Barbados	Barbados	Americas	N America	281.842	285.978	340.663	339.42	345.538	342.431	347.508	365.961	402.491	460.502	541.628	1574.49	1678.89	2022.5	1891.44	1835.22	1756.85	1726.73	1766	1891.51	2113.08	2432.28	112.658	108.094	103.732	95.5865	92.0076	88.0451	86.3581	88.1063	94.2637	105.54	122.429	13.0176	12.3461	11.3898	10.4568	9.98398	9.43657	9.13942	9.19006	9.65268	10.543	11.8233	0	0
Bermuda	Bermuda	Americas	N America	0	0	0	0	0	0	0	0	0	0	0	0	0	0	0	0	0	0	0	0	0	0	0	0	0	0	0	0	0	0	0	0	0	0	0	0	0	0	0	0	0	0	0	0	0	0
Canada	Canada	Americas	N America	204813	275568	258890	274255	289532	303851	320073	338171	357911	378934	400817	504431	552504	594570	680520	761843	834494	913222	996349	1.08139e+06	1.16581e+06	1.24736e+06	322513	352150	299664	317450	335133	351707	370483	391432	414281	438615	463945	1568.6	1495.8	1430.4	1572.4	1697.43	1802.23	1901.13	1986.22	2050.65	2089.39	2098.98	0	0
Cayman Islands	Cayman Islands	Americas	N America	0	0	0	0	0	0	0	0	0	0	0	0	0	0	0	0	0	0	0	0	0	0	0	0	0	0	0	0	0	0	0	0	0	0	0	0	0	0	0	0	0	0	0	0	0	0
Cuba	Cuba	Americas	N America	9079.71	11102.8	16551	17957.6	19154.3	20145.5	21604.4	23412	25388.2	27415.3	29475.9	50723.2	65181.2	98262.8	100070	101732	103357	107350	112978	119312	125799	132367	3629.34	4196.62	5039.8	5057.18	5100.27	5179.77	5368.86	5636.53	5945.92	6283.16	6662.7	419.369	479.322	553.37	553.238	553.443	555.161	568.195	587.927	608.868	627.662	643.435	0	0
Curacao		Americas	N America	0	0	0	0	0	0	0	0	0	0	0	0	0	0	0	0	0	0	0	0	0	0	0	0	0	0	0	0	0	0	0	0	0	0	0	0	0	0	0	0	0	0	0	0	0	0
Dominica	Dominica	Americas	N America	41.165	43.2021	57.7689	59.5351	68.2459	76.8295	87.7227	101.376	118.362	138.911	162.741	229.965	253.627	342.972	331.762	362.466	394.175	435.885	489.205	556.243	637.411	730.818	16.4545	16.3295	17.5907	16.7661	18.172	19.7542	21.7997	24.4067	27.7204	31.8361	36.7857	1.90131	1.86509	1.93146	1.83415	1.9719	2.11723	2.3071	2.54577	2.8386	3.1803	3.5525	0	0
Dominican Republic	Dominican Republic	Americas	N America	4985.8	5674.74	8808.21	10559	12483.8	13875.1	15181.7	16591.7	18338.1	20670.9	23804.9	27852.8	33314.8	52294	58840.7	66303.7	71186.4	75436.5	80065.8	86180.1	94851.5	106900	1992.92	2144.94	2682.11	2973.6	3324.1	3567.53	3772.77	3994.52	4294.79	4737.45	5380.83	230.281	244.986	294.495	325.302	360.706	382.363	399.278	416.654	439.791	473.252	519.641	0	0
Grenada	Grenada	Americas	N America	70.9539	84.7816	92.9062	101.818	112.983	120.191	127.59	137.169	150.739	169.851	195.288	396.379	497.729	551.58	567.387	600.071	616.643	633.982	661.93	708.401	779.387	876.976	28.3617	32.0457	28.29	28.6737	30.0842	30.9033	31.707	33.024	35.3033	38.9273	44.1426	3.27718	3.66014	3.10624	3.13681	3.26452	3.31217	3.35561	3.44462	3.61508	3.88867	4.26297	0	0
Guadeloupe	Guadeloupe	Americas	N America	0	0	0	0	0	0	0	0	0	0	0	0	0	0	0	0	0	0	0	0	0	0	0	0	0	0	0	0	0	0	0	0	0	0	0	0	0	0	0	0	0	0	0	0	0	0
Haiti	Haiti	Americas	N America	1075.87	1001.81	1192.56	1464.63	2281.75	3737.87	6392.23	10715.1	16736.4	23912.5	31560.8	6010.29	5881.36	7080.17	8161.74	12118.8	19177.2	31762.4	51707.2	78652.7	109726	141730	430.048	378.665	363.135	412.465	607.568	961.071	1588.52	2579.69	3919.66	5480.36	7133.96	49.6918	43.2497	39.8722	45.1223	65.9287	103.006	168.115	269.079	401.377	547.466	688.946	0	0
Jamaica	Jamaica	Americas	N America	1530.05	1618.34	1820.78	1823.26	1833.71	1799.67	1822.95	1954.21	2248.49	2764.83	3549.09	8547.54	9500.82	10809.9	10160.2	9739.19	9233.23	9058.06	9430.35	10566.8	12686.8	15937.9	611.593	611.7	554.429	513.461	488.269	462.727	453.017	470.484	526.598	633.655	802.231	70.6693	69.866	60.8763	56.1709	52.9833	49.5945	47.9435	49.0745	53.9241	63.2995	77.4737	0	0
Mexico	Mexico	Americas	N America	191560	201504	210717	242140	274565	305844	342735	386235	437433	497322	566565	596951	719908	876111	991110	1.11074e+06	1.22648e+06	1.36347e+06	1.52509e+06	1.71467e+06	1.93454e+06	2.18503e+06	28439.9	32495.9	36282.8	39704.1	43515	47496.2	52302	58183.9	65478.5	74630.9	86217	119.414	71.998	789.21	875.276	963.032	1046.37	1141.53	1248.99	1368.32	1497.43	1631.72	0	0
Puerto Rico		Americas	N America	0	0	0	0	0	0	0	0	0	0	0	0	0	0	0	0	0	0	0	0	0	0	0	0	0	0	0	0	0	0	0	0	0	0	0	0	0	0	0	0	0	0	0	0	0	0
Saint Kitts and Nevis	St. Kitts and Nevis	Americas	N America	62.8822	71.6699	85.1208	95.5002	102.351	104.438	106.405	109.779	115.978	126.229	141.379	351.287	420.754	505.359	532.18	543.607	535.82	528.714	529.754	545.041	579.218	634.888	25.1353	27.0898	25.9194	26.8945	27.2534	26.8528	26.4423	26.4296	27.1622	28.9297	31.9571	2.90437	3.09409	2.84595	2.94217	2.95734	2.87805	2.79843	2.75678	2.78143	2.88995	3.08618	0	0
Saint Lucia	Saint Lucia	Americas	N America	113.788	118.618	148.964	146.809	154.941	160.662	172.697	195.131	232.173	287.101	360.978	635.667	696.37	884.393	818.102	822.918	824.277	858.115	941.632	1091.1	1317.41	1621.04	45.4833	44.8351	45.3597	41.344	41.2565	41.3089	42.9165	46.9784	54.3751	65.7991	81.5951	5.25557	5.12089	4.98049	4.52289	4.47685	4.42744	4.54192	4.90015	5.56806	6.57306	7.87986	0	0
Saint Vincent and the Grenadines	St. Vincent and Grenadines	Americas	N America	58.9817	70.1757	86.0695	89.5666	108.792	129.398	154.314	182.543	213.091	244.499	276.889	329.497	411.981	510.991	499.115	577.812	663.876	766.771	880.887	1001.42	1121.92	1243.42	23.5762	26.525	26.2082	25.2235	28.9683	33.2704	38.3482	43.9478	49.906	56.0352	62.5877	2.72421	3.02958	2.87767	2.75936	3.14342	3.56588	4.05845	4.58404	5.11042	5.59769	6.04427	0	0
Sint Maarten		Americas	N America	0	0	0	0	0	0	0	0	0	0	0	0	0	0	0	0	0	0	0	0	0	0												0	0	0	0	0	0	0	0	0	0	0	0	0
Trinidad and Tobago	Trinidad and Tobago	Americas	N America	1663.42	2348.7	3154.34	3245.71	3596.24	3675.54	3644.24	3575.76	3536.68	3567.34	3684.15	9292.59	13788.6	18727.2	18086.9	19100.3	18857.4	18107.9	17255.4	16620.6	16369.3	16544.4	664.904	887.762	960.499	914.048	957.582	945.045	905.62	860.878	828.292	817.579	832.76	76.8293	101.397	105.463	99.9938	103.91	101.289	95.8432	89.7951	84.8178	81.6728	80.4219	0	0
United States	USA	Americas	N America	1.74076e+06	1.89399e+06	1.97775e+06	2.1098e+06	2.24606e+06	2.38423e+06	2.53287e+06	2.6906e+06	2.85558e+06	3.02561e+06	3.19847e+06	6.93399e+06	7.46228e+06	6.40394e+06	7.12132e+06	7.83273e+06	8.52414e+06	9.22886e+06	9.93103e+06	1.06146e+07	1.12645e+07	1.18715e+07	2.25524e+06	2.51901e+06	2.25825e+06	2.40903e+06	2.56462e+06	2.72239e+06	2.89211e+06	3.07222e+06	3.26059e+06	3.45473e+06	3.65211e+06	48177	49578.3	57506.9	61470.1	64967.3	67914.9	70270.5	71864.3	72564.2	72281.2	71028.9	0	0
Virgin Islands (US)		Americas	N America	0	0	0	0	0	0	0	0	0	0	0	0	0	0	0	0	0	0	0	0	0	0	0	0	0	0	0	0	0	0	0	0	0	0	0	0	0	0	0	0	0	0	0	0	0	0
North America Remaining				10658.8	12141.6	16728.2	18894.4	22100.1	25061.7	29148.2	35173.8	43541.5	54050.3	66272.3	59544.8	71279.6	99314.6	105290	117378	128580	144834	169736	204624	248017	297608	4260.55	4589.26	5093.75	5320.98	5884.66	6443.82	7243.53	8468.22	10197.5	12387.5	14980.1	492.304	524.167	559.294	582.097	638.56	690.64	766.594	883.29	1044.23	1237.46	1446.67	0	0
China	China (includes Hong Kong)	Asia-Pacific	NE Asia	638824	995717	1.74188e+06	2.10442e+06	2.52862e+06	2.85916e+06	3.2704e+06	3.76653e+06	4.33903e+06	4.956e+06	5.55583e+06	4.64556e+06	6.36844e+06	8.7753e+06	1.09783e+07	1.39463e+07	1.63751e+07	1.94343e+07	2.31031e+07	2.72311e+07	3.1472e+07	3.52883e+07	1.35118e+06	1.94628e+06	2.73572e+06	3.05556e+06	3.52887e+06	3.94079e+06	4.4843e+06	5.182e+06	6.05088e+06	7.09267e+06	8.28314e+06	354664	521565	718696	842386	1.00335e+06	1.12629e+06	1.26695e+06	1.41233e+06	1.53944e+06	1.61559e+06	1.60657e+06	0	0
Hong Kong Region of China		Asia-Pacific	NE Asia	0	0	0	0	0	0	0	0	0	0	0	0	0	0	0	0	0	0	0	0	0	0	0	0	0	0	0	0	0	0	0	0	0	0	0	0	0	0	0	0	0	0	0	0	0	0
Japan	Japan	Asia-Pacific	NE Asia	313017	334913	334175	332740	328817	322528	314631	305758	296451	287251	278537	1.0285e+06	1.00564e+06	898761	895882	888010	875392	859547	841744	823069	804609	787126	22119	22900	21387.2	21295.3	21044.3	20641.8	20136.4	19568.5	18972.8	18384	17826.4	384470	391275	393863	392601	389151	383621	376678	368876	360692	352602	344941	0	0
Korea Democratic People's Republic	Democratic People’s Republic of Korea	Asia-Pacific	NE Asia	802.271	943.792	862.519	1103.38	1475.98	2085.99	3228.89	5307.41	8862.39	14414.4	22241.3	5155.3	6755.53	7156.41	8400.24	10514.3	14200.8	21070.6	33356.8	53975.5	85662.7	129894	1344.56	1612.96	1628.62	1829.4	2018.4	2293.36	2795.41	3743.66	5511.76	8617.88	13626.5	416.191	469.636	477.908	550.245	629.034	741.213	952.151	1354.36	2094.25	3344.39	5224.16	0	0
Korea Republic	Korea (South)	Asia-Pacific	NE Asia	56100	56756.5	68832.8	111740	146176	166160	188368	212790	239055	266357	293590	435566	634016	688804	822973	923537	976723	1.03382e+06	1.0935e+06	1.15313e+06	1.20901e+06	1.25728e+06	10800	15490.9	8761.97	14223.8	18607.3	21151	23978.1	27086.8	30430.2	33905.5	37372.1	48934.5	54383.6	59083.1	66350.6	71077.5	73345.2	75336.2	76782.3	77357.9	76772	74848	0	0
Macau Region of China	Macao	Asia-Pacific	NE Asia	0	0	0	0	0	0	0	0	0	0	0	0	0	0	0	0	0	0	0	0	0	0	0	0	0	0	0	0	0	0	0	0	0	0	0	0	0	0	0	0	0	0	0	0	0	0
Mongolia	Mongolia	Asia-Pacific	NE Asia	846.66	1102.92	1293.75	1879.7	2367.85	2810.04	3292.67	3837.06	4479.7	5269.29	6264.29	5440.54	7894.55	10734.4	14310.4	16867.7	19129.9	21486.8	24115.7	27283.2	31314.7	36584.9	1418.95	1884.92	2442.88	3116.52	3383.71	3650.03	3961	4328.22	4769.46	5311.02	5993.18	439.218	548.819	716.847	937.383	1048.77	1157.42	1288.08	1443.84	1628.48	1846.45	2102.46	0	0
Argentina	Argentina	Americas	S America	42653.3	43123.5	52074.5	68193.3	83257.9	97970.3	113310	127770	141122	154462	169436	238280	253166	309164	380011	442198	502638	563025	616573	663204	708769	760883	17049.4	16299.8	15856.7	19204.4	22169.3	25189.9	28158.3	30761.1	33050.9	35400.2	38299	1970.05	1861.7	1741.07	2100.9	2405.65	2699.82	2980.04	3208.58	3384.44	3536.33	3698.64	0	0
Belize	Belize	Americas	S America	124.539	154.426	201.139	220.312	254.944	287.056	329.903	392.238	485.648	624.065	821.74	695.728	906.592	1194.15	1227.7	1354.06	1472.75	1639.25	1892.8	2282.31	2863.61	3690.18	49.7808	58.37	61.2469	62.0435	67.8849	73.8072	81.9832	94.4326	113.739	143.026	185.745	5.75214	6.66679	6.72491	6.78735	7.36636	7.91056	8.67642	9.84993	11.647	14.2877	17.9379	0	0
Bolivia	Bolivia	Americas	S America	2662	2966.49	4258.39	5293.06	6338.16	7384.33	8740.01	10588.2	13178.9	16822.4	21852	14871.1	17415.4	25281.9	29495.9	33663.1	37885.4	43428.2	51094.9	61934.4	77191.8	98130.7	1064.06	1121.27	1296.69	1490.62	1687.68	1898.64	2171.95	2549.15	3086.51	3855.42	4939.4	122.951	128.067	142.376	163.069	183.135	203.494	229.861	265.892	316.061	385.141	477.012	0	0
Brazil	Brazil	Americas	S America	378164	506302	727012	789560	865255	920429	984667	1.05942e+06	1.14628e+06	1.24676e+06	1.36148e+06	1.13072e+06	1.15871e+06	1.45064e+06	1.6242e+06	1.81913e+06	2.02154e+06	2.26717e+06	2.56232e+06	2.91284e+06	3.32293e+06	3.79178e+06	154836	221698	266988	257531	241253	248213	259867	277741	303779	340500	391187	281.666	288.639	361.359	395.042	432.264	470.057	514.176	564.615	620.758	680.963	741.835	0	0
Chile	Chile	Americas	S America	16339.4	19214.5	26151.6	30802.8	34230.3	35770.9	36703.8	37710	39375	42171.7	46444.5	91279.1	112803	155261	171650	181803	183523	182377	181975	185043	193511	208568	6531.21	7262.7	7963.2	8674.6	9114.61	9197.32	9121.15	9078.81	9221.65	9665.1	10498.3	754.677	829.517	874.359	948.972	989.05	985.757	965.306	946.978	944.305	965.504	1013.85	0	0
Colombia	Colombia	Americas	S America	24285.1	27764.6	39741.8	47558	53665.6	58009.3	62760.2	68640.9	76509	87178.4	101301	135667	162998	235945	265020	285028	297618	311849	331237	359554	400030	454909	9707.23	10494.5	12101.4	13393.2	14289.7	14915.2	15596.4	16525.5	17918.4	19979.9	22897.8	1121.66	1198.64	1328.73	1465.17	1550.61	1598.59	1650.59	1723.72	1834.86	1995.91	2211.31	0	0
Costa Rica	Costa Rica	Americas	S America	2718.92	3179.37	4568.54	5456.97	6410.69	7137.58	7853.18	8625.71	9556.55	10745.5	12271	15189	18665.1	27123.2	30409.3	34048.3	36619.5	39021.6	41624.6	44911.1	49307	55105.2	1086.81	1201.74	1391.12	1536.78	1706.99	1835.2	1951.57	2076.67	2238.15	2462.69	2773.72	125.58	137.258	152.745	168.118	185.23	196.694	206.538	216.61	229.188	246.013	267.865	0	0
Ecuador	Ecuador	Americas	S America	6749.42	8186.32	11090	13838.3	16968.2	20788.8	26167.1	33188.7	41556	50816.6	60741.8	37705.2	48059.5	65841.2	77114.7	90121.5	106657	130022	160157	195293	233179	272773	2697.88	3094.26	3376.93	3897.1	4518.19	5345.16	6502.73	7990.3	9732.44	11646.4	13730	311.739	353.415	370.787	426.33	490.28	572.887	688.194	833.44	996.61	1163.42	1325.94	0	0
El Salvador	El Salvador	Americas	S America	2701.38	2903.97	3573.04	3946.09	5163.86	6866.75	9211.65	11909.6	14482.2	16688.9	18601.2	15091.1	17048.4	21213	21989.8	27426.2	35230	45771.7	57471.7	68059.1	76579.3	83532.1	1079.8	1097.64	1087.99	1111.29	1375	1765.56	2289.16	2867.29	3391.74	3824.83	4204.58	124.77	125.368	119.462	121.571	149.204	189.231	242.266	299.077	347.317	382.085	406.048	0	0
French Guiana	French Guyana	Americas	S America	0	0	0	0	0	0	0	0	0	0	0	0	0	0	0	0	0	0	0	0	0	0	0	0	0	0	0	0	0	0	0	0	0	0	0	0	0	0	0	0	0	0	0	0	0	0
Guatemala	Guatemala	Americas	S America	5116.83	5684.74	7799.34	9025.78	10332.9	11703.8	13842.9	17317.1	22874.6	31346.1	43403.3	28584.8	33373.5	46304.4	50296.7	54879.9	60046.4	68783.9	83566.3	107499	143836	194911	2045.3	2148.72	2374.91	2541.82	2751.37	3009.25	3440.06	4169.16	5357.24	7184.03	9810.82	236.333	245.418	260.765	278.066	298.559	322.527	364.067	434.87	548.586	717.655	947.458	0	0
Guyana	Guyana	Americas	S America	245.931	243.825	345.922	406.86	490.615	582.215	697.798	841.802	1019.49	1237.05	1499.77	1373.88	1431.43	2053.73	2267.25	2605.75	2987.06	3467.29	4062.24	4791.1	5676.39	6735	98.3036	92.1609	105.334	114.579	130.638	149.698	173.408	202.667	238.765	283.513	339.006	11.3589	10.5263	11.5656	12.5345	14.1758	16.0444	18.352	21.1394	24.4497	28.3218	32.7387	0	0
Honduras	Honduras	Americas	S America	1571.05	1887.56	2583.89	2986.63	3423.13	3806.78	4303.63	5009.58	6062.53	7646.8	9990.61	8776.56	11081.3	15340.5	16643.2	18180.9	19530.7	21384.3	24174.5	28490.9	35088.4	44864.7	627.98	713.46	786.797	841.086	911.488	978.789	1069.48	1206.07	1419.85	1752.53	2258.26	72.5628	81.4886	86.3903	92.0119	98.9079	104.905	113.185	125.801	145.394	175.07	218.087	0	0
Nicaragua	Nicaragua	Americas	S America	1263.7	1412.65	1833.32	2263.06	2636.6	2996.21	3477.21	4162.12	5156.2	6597.4	8637.05	7059.58	8293.28	10884.4	12611	14003.4	15372.1	17277.9	20084.9	24231.6	30273.1	38786.3	505.127	533.955	558.248	637.316	702.055	770.377	864.111	1002.05	1207.58	1512.02	1952.31	58.3672	60.9862	61.2957	69.7201	76.1818	82.5681	91.4503	104.52	123.658	151.045	188.54	0	0
Panama	Panama	Americas	S America	2199.89	2599.95	4357.63	5846.47	7142.4	8157.18	9081.22	9981.19	10992.4	12247.5	13862	12289.5	15263.5	25871.1	32579.8	37934.6	41850.5	45123.7	48165.7	51658.7	56199.5	62250.1	879.338	982.728	1326.9	1646.47	1901.83	2097.35	2256.75	2403.01	2574.42	2806.94	3133.36	101.607	112.243	145.694	180.118	206.372	224.792	238.835	250.649	263.623	280.402	302.597	0	0
Paraguay	Paraguay	Americas	S America	2334.26	2455.76	3594.17	4447.38	5342.64	6457.38	8127.1	10489	13548.8	17180	21217.3	13040.2	14417.1	21338.4	24783.3	28375.7	33129.7	40382.7	50616.3	63672.6	78832.7	95280.5	933.052	928.229	1094.43	1252.46	1422.6	1660.3	2019.64	2525.27	3173.13	3937.38	4795.94	107.814	106.019	120.168	137.015	154.37	177.949	213.742	263.402	324.932	393.328	463.157	0	0
Peru	Peru	Americas	S America	12197.9	14394.2	23037.3	28850.9	37658.4	47158.1	58020.7	69733.1	82114.4	95387.9	110074	68142.4	84504	136771	160773	200011	241945	288299	336507	385897	437701	494309	4875.73	5440.7	7014.87	8124.91	10027.4	12125.2	14418.6	16788.5	19231.2	21861.4	24881	563.388	621.415	770.233	888.838	1088.1	1299.56	1525.94	1751.15	1969.3	2183.87	2402.83	0	0
Suriname	Suriname	Americas	S America	334.434	422.757	596.944	690.318	843.399	1009.38	1200.23	1391.64	1565.33	1722.17	1877.64	1868.29	2481.89	3544.03	3846.84	4479.45	5178.64	5963.84	6715.55	7356.27	7902.44	8431.88	133.68	159.794	181.77	194.406	224.574	259.529	298.267	335.042	366.6	394.695	424.418	15.4466	18.251	19.9583	21.2673	24.3692	27.816	31.5661	34.947	37.5402	39.4284	40.9873	0	0
Uruguay	Uruguay	Americas	S America	3093.48	2987.91	4576.82	5401.73	6174.42	6722.45	7228.82	7720.73	8264.6	8933.58	9789.5	17281.5	17541.1	27172.4	30101.5	32793.5	34489.6	35919.3	37257.5	38839.5	40993	43961.6	1236.53	1129.37	1393.65	1521.22	1644.08	1728.46	1796.41	1858.79	1935.57	2047.44	2212.81	142.88	128.992	153.022	166.416	178.404	185.254	190.117	193.884	198.204	204.53	213.697	0	0
Venezuela	Venezuela	Americas	S America	25534.2	27722.2	38132.9	40826.2	44166.4	47186.4	52456.7	60945.3	73037.1	88295.6	105860	142645	162749	226394	227506	234576	242091	260652	294100	343239	405157	475385	10206.5	10478.4	11611.5	11497.4	11760.3	12132.5	13035.9	14672.8	17105.3	20236	23928.5	1179.36	1196.8	1274.94	1257.77	1276.14	1300.34	1379.61	1530.47	1751.6	2021.49	2310.84	0	0
South America Remaining				40705.9	46113.9	64440.8	76787.5	88784	98881.9	110797	126139	146562	173963	210268	227400	270722	382582	427903	471548	507315	550541	608702	688770	798254	944247	16270.9	17430.1	19622.3	21624.7	23640.8	25424.3	27534	30368.4	34325	39869.6	47528.6	1880.1	1990.8	2154.53	2365.67	2565.33	2724.94	2913.96	3167.62	3514.9	3982.81	4589.97	0	0
Australia	Australia	Asia-Pacific	SE Asia	139390	173030	185913	196899	205727	210719	216395	222798	229932	237794	246394	257799	281191	285023	347253	395396	421661	451276	484279	520466	559580	601358	136903	189033	226037	239394	250127	256196	263097	270883	279557	289115	299572	10642.7	11608.4	11766.6	13714.2	15188.6	16081.6	17021.1	17995	18989.3	19985.8	20956.2	0	0
Brunei Darussalam	Brunei Darussalam	Asia-Pacific	SE Asia	1874.66	1976.63	1750.59	1655.05	1626.66	1520.56	1428.26	1362.67	1332.89	1342.3	1391.18	12046.4	14148.4	14524.9	12600.1	11587.7	10351.5	9320.29	8564.29	8117.84	7977.13	8124.82	3141.82	3378.1	3305.5	2744.06	2808.08	2857.49	2903.59	2947.99	2992.65	3038.78	3086.61	972.51	983.582	969.976	825.354	852.044	872.204	891.571	910.404	929.092	947.657	965.609	0	0
Cambodia	Cambodia	Asia-Pacific	SE Asia	1268.55	1886.56	2233.51	2849.82	3382.9	3943.67	4772.75	6045.14	8006.28	10975.1	15351.4	8151.54	13503.8	18531.6	21696.2	24098.5	26847.3	31145.3	37993.4	48761.4	65223.4	89655.5	2126.01	3224.18	4217.34	4724.99	5052.7	5410.07	5898.95	6615.24	7722.38	9484.61	12323.7	658.078	938.764	1237.55	1421.17	1557.8	1703.6	1909	2212.82	2676.12	3385.38	4450.88	0	0
Cook Islands	Cook Islands	Asia-Pacific	SE Asia	6.95271	13.1802	15.7832	19.9326	25.7653	30.6365	34.866	38.3619	41.5643	44.939	49.0412	44.6774	94.342	130.955	151.75	183.542	208.564	227.523	241.102	253.143	267.067	286.412	11.6524	22.5252	29.8021	33.0482	36.1267	39.0441	42.0776	45.1022	48.1142	51.1239	54.2431	3.60683	6.55853	8.74523	9.94018	11.2236	12.4138	13.6884	14.9713	16.2317	17.443	18.6137	0	0
Fiji	Fiji	Asia-Pacific	SE Asia	435.112	466.773	414.391	435.959	445.581	448.473	472.172	525.07	616.159	754.611	948.767	2795.98	3341.1	3438.25	3319.03	3174.15	3053.07	3081.23	3300.04	3752.65	4484.55	5541.01	729.223	797.726	782.46	722.817	746.071	770.018	801.215	844.292	906.039	995.749	1125.24	225.721	232.269	229.608	217.408	227.102	236.872	249.98	268.251	294.09	330.196	378.796	0	0
Guam		Asia-Pacific	SE Asia	0	0	0	0	0	0	0	0	0	0	0	0	0	0	0	0	0	0	0	0	0	0	0	0	0	0	0	0	0	0	0	0	0	0	0	0	0	0	0	0	0	0	0	0	0	0
Indonesia	Indonesia	Asia-Pacific	SE Asia	93174.3	111696	126545	154696	183984	209907	240519	277584	323283	380380	452356	598727	799504	1.04995e+06	1.17773e+06	1.31063e+06	1.42898e+06	1.56954e+06	1.7446e+06	1.96892e+06	2.26055e+06	2.64186e+06	156155	190891	238944	256485	274405	292351	313700	339495	371072	410213	459548	48335.6	55580.5	70116.4	77145.2	84616	91937.3	100907	111849	125062	140816	159331	0	0
Kiribati	Kiribati	Asia-Pacific	SE Asia	11.3333	11.703	10.4583	11.7721	13.8615	16.6405	21.7653	31.3789	49.3308	81.2923	133.394	72.8264	83.7682	86.7738	89.6228	98.7439	113.283	142.032	197.215	300.444	483.109	779.053	18.9939	20.0006	19.7476	19.518	20.8297	22.4508	25.0758	29.7935	38.9155	56.7444	89.892	5.87932	5.82346	5.7948	5.87061	6.41742	7.0788	8.18171	10.1828	14	21.1757	33.6162	0	0
Laos	Laos	Asia-Pacific	SE Asia	951.196	1225.02	1543.54	2105.08	2840.61	3671.25	4727.84	6065.87	7761.09	9902.9	12598	6112.28	8768.51	12806.9	16026.3	20235.4	24992.8	30852.2	38123.6	47268.1	58851.6	73574.9	1594.15	2093.58	2914.54	3490.2	3859.99	4277.3	4830.84	5569.94	6562.47	7895.37	9685.3	493.448	609.575	855.251	1049.78	1203.94	1374.19	1606.76	1920.26	2335.6	2872.06	3543.83	0	0
Malaysia	Malaysia	Asia-Pacific	SE Asia	28688.7	34411.6	36712.2	43795.5	49622.7	53585.5	57562.8	61693.1	66387.9	72266.4	80093.7	184351	246313	304605	333422	353493	364794	375634	387738	404329	429470	467765	48080.7	58810.2	69320.5	72612.6	76765.1	80618.3	84741.8	89110.4	93756.5	98812.8	104586	14882.7	17123.4	20341.6	21840.3	23571.4	25143.5	26876	28729	30673.2	32708.2	34875.1	0	0
Marshall Islands		Asia-Pacific	SE Asia	11.8953	12.5901	11.3777	11.4355	11.4682	11.6692	13.1463	16.4417	22.3801	32.0623	46.892	76.4379	90.1182	94.402	87.0602	81.6953	79.4404	85.7882	103.335	136.304	190.542	273.86	19.9359	21.5168	21.4836	18.96	19.4878	20.1454	21.2546	23.1479	26.4216	32.0531	41.6058	6.17087	6.2649	6.30421	5.70275	5.92282	6.1911	6.65712	7.46018	8.83011	11.0967	14.6818	0	0
Micronesia Federated States		Asia-Pacific	SE Asia	0	0	0	19.2074	19.1139	19.371	21.4451	26.304	36.0666	54.2836	85.6068	165.879	181.171	177.512	146.229	136.16	131.872	139.943	165.319	219.66	322.6	499.963	43.263	43.2567	40.3972	31.8457	32.6768	33.7475	35.4581	38.3498	43.701	54.1094	74.1089	13.3915	12.5948	11.8543	9.5785	9.925	10.3618	11.0805	12.3071	14.5464	18.7355	26.2414	0	0
Myanmar	Myanmar	Asia-Pacific	SE Asia	3555.66	3547.8	4239.72	8511.42	13557	19588.8	27955.7	39351.5	53784.3	70712.2	89683.5	22848.3	25394.6	35177.4	64798.8	96574.7	133355	182429	247322	327568	420233	523772	5959.09	6063.26	8005.5	14111.9	16381.2	19046.5	22943.4	28640.3	36571	46871.4	59484.4	1844.56	1765.4	2349.16	4244.55	5190.61	6277.98	7915.28	10331.7	13650.4	17796.1	22529.8	0	0
New Caledonia	New Caledonia	Asia-Pacific	SE Asia	0	0	0	0	0	0	0	0	0	0	0	0	0	0	0	0	0	0	0	0	0	0	0	0	0	0	0	0	0	0	0	0	0	0	0	0	0	0	0	0	0	0	0	0	0	0
New Zealand	New Zealand	Asia-Pacific	SE Asia	8184.79	9491.36	8602.47	9231.84	9381.41	9076.43	8825.15	8712.95	8822.23	9227.83	9998.41	52594.6	67937.9	71375.5	70283.4	66829.5	61789.6	57589.8	54760.4	53730.9	54839.8	58393	13717.3	16220.9	16243.3	15306.3	15778.5	16163.5	16542.2	16928.2	17343.9	17824.2	18420.6	4245.99	4722.95	4766.49	4603.81	4800.66	4957.73	5116.85	5280.55	5454.51	5647.85	5871.65	0	0
Palau Republic		Asia-Pacific	SE Asia	18.7519	21.0485	15.3406	17.8898	20.453	22.4638	24.7964	27.5681	31.0016	35.4545	41.3841	120.497	150.662	127.282	136.198	145.699	152.927	161.812	173.264	188.812	210.701	241.692	31.4271	35.9723	28.9663	29.6612	31.4257	33.1369	35.0955	37.3553	40.0114	43.2435	47.3623	9.72783	10.4738	8.49998	8.92146	9.65707	10.3552	11.1781	12.1366	13.2481	14.5489	16.0947	0	0
Papua New Guinea	Papua New Guinea	Asia-Pacific	SE Asia	757.235	801.921	917.868	1233.42	1507.66	1887.87	2555.47	3711.98	5638.68	8651.48	13019.6	4865.91	5740.04	7615.64	9390.19	10740	12852	16676.1	23329.6	34341.8	51414.6	76037.7	1269.08	1370.5	1733.13	2044.99	2203.1	2404.82	2732.42	3296.9	4290.47	6001.74	8805.06	392.828	399.04	508.576	615.091	681.003	763.3	900.943	1140.37	1556.15	2244.89	3296.99	0	0
Philippines	Philippines	Asia-Pacific	SE Asia	24993.3	29764.6	32455.4	40010.8	48717.3	58551.2	72342.4	91307.5	116748	149975	192500	160604	213051	269286	304608	347043	398599	472081	573863	711043	891284	1.12424e+06	41887.3	50868.3	61282.8	66337.5	71395.3	77114.7	84885.2	95620.2	110527	131092	159251	12965.7	14811	17983	19952.9	22061.5	24394.8	27659.6	32213	38451	46727.8	57296.2	0	0
Samoa	Samoa	Asia-Pacific	SE Asia	57.2907	69.2871	62.198	62.73	67.5213	71.5756	79.0719	92.8005	114.109	145.616	190.706	368.144	495.948	516.063	477.573	480.996	487.265	515.995	583.246	694.968	865.378	1113.77	96.016	118.413	117.443	104.006	108.625	113.432	119.695	128.763	141.938	161.544	191.226	29.7205	34.4776	34.4629	31.2827	33.2084	35.1696	37.8009	41.6472	47.1607	55.0515	66.1911	0	0
Singapore	Singapore	Asia-Pacific	SE Asia	15356.9	20095.8	22642.6	25931.3	26880.3	25243.2	23395.2	21724.6	20479.4	19773.3	19643.3	98681.8	143843	187868	197419	191485	171848	152669	136538	124728	117510	114722	25737.3	34344.1	42754	42993.9	44517.9	45372.3	46028.4	46528.7	46906.1	47180.9	47362.3	7966.63	9999.76	12545.9	12931.7	13567	13915.5	14191.2	14403.4	14561.3	14672	14740.1	0	0
Solomon Islands	Solomon Islands	Asia-Pacific	SE Asia	54.1344	54.2648	58.2177	71.3523	82.7355	97.5792	125.697	179.128	278.713	455.202	743.422	347.861	388.42	483.038	543.216	589.376	664.29	820.257	1125.81	1697.47	2705.2	4341.75	90.7261	92.7397	109.927	118.301	125.773	134.881	149.606	176.055	226.872	325.517	508.957	28.083	27.0025	32.2575	35.5826	38.6973	42.4132	48.5998	59.8187	81.0837	120.786	189.632	0	0
Thailand	Thailand	Asia-Pacific	SE Asia	43891.3	54438.1	56051.8	62668.8	72858.5	82577.5	93539.1	104123	113289	121220	129027	282041	389660	465067	477107	519016	562163	610403	654407	689975	720392	753546	73559.4	93035.8	105838	103904	110538	117466	125491	134065	142446	150003	156411	22769.3	27088.7	31057.4	31252.2	34017.7	36844.4	40216	43852.5	47359.7	50401.2	52806.3	0	0
Timor-Leste		Asia-Pacific	SE Asia	90.8008	98.9329	123.311	146.309	168.407	197.933	254.939	365.366	576.395	960.727	1602.24	583.476	708.148	1023.12	1113.88	1199.67	1347.47	1663.64	2296.31	3510.47	5709.47	9357.44	152.177	169.079	232.837	242.58	257.435	275.75	305.608	360.037	467.12	680.989	1088.59	47.1043	49.2296	68.3245	72.9628	79.1558	86.628	99.1727	122.26	167.07	253.147	406.122	0	0
Tokelau		Asia-Pacific	SE Asia	0	0	0	0	0	0	0	0	0	0	0	0	0	0	0	0	0	0	0	0	0	0	0	0	0	0	0	0	0	0	0	0	0	0	0	0	0	0	0	0	0	0	0	0	0	0
Tonga	Tonga	Asia-Pacific	SE Asia	34.2248	36.4845	31.8496	31.1295	34.4034	38.8354	47.5174	62.6418	86.5883	121.067	166.579	219.925	261.151	264.259	236.994	245.076	264.38	310.081	393.7	527.357	719.485	972.857	57.3588	62.3528	60.1389	51.6125	54.2396	57.46	62.4531	70.5198	83.5663	103.834	133.451	17.7546	18.1549	17.6473	15.5239	16.6192	17.933	20.0308	23.4525	28.912	37.0693	48.1845	0	0
Vanuatu	Vanuatu	Asia-Pacific	SE Asia	39.6335	39.4433	43.0993	44.4709	49.0944	55.956	72.1059	107.912	182.418	319.864	532.439	254.68	282.329	357.599	338.564	349.73	380.931	470.538	678.221	1111	1900.91	3109.56	66.4235	67.4094	81.3807	73.7324	77.4655	82.2359	90.6886	107.824	144.74	220.489	355.575	20.5605	19.6272	23.8806	22.1771	23.7334	25.6796	29.231	36.4994	51.9474	82.4345	133.133	0	0
Vietnam	Vietnam	Asia-Pacific	SE Asia	16139	21184	24525.1	31235.7	44190.3	59644.7	78818.6	101134	126044	153407	183754	103708	151632	203487	237803	314795	406043	514342	635619	767657	911676	1.07317e+06	27048.1	36203.9	46308.6	51788.6	58038.3	65355.2	75042.4	87367.4	102459	120321	141031	8372.37	10541.3	13589	15576.9	18182.3	21167.5	25237.5	30465.3	36780.8	43969.9	51742.1	0	0
South East Asia Remaining				29153.5	36301	38476.6	43878.7	46557.9	46354.1	46872.2	49096.2	54075.3	62878	76542.4	187503	260019	319421	334056	331661	315565	305871	308567	329340	373675	447025	48902.8	62082.4	72692.4	72750.6	75730.4	78067.8	80624.7	83748.2	87985.3	94151.1	103394	15137.2	18076.2	21331.1	21881.8	23124.1	24077.7	25152	26476.8	28249.9	30731.5	34200.3	0	0
	Aruba
	British Virgin Islands
	Chinese Taipei
	East Timor
	Falkland Islands
	French Polynesia
	Kosovo
	Martinique
	Montserrat
	Netherlands Antilles
	St. Pierre et Miquelon
	South Sudan
	Turks and Caicos Islands
Countries Nodes
South Nigeria				0	0	0	48754.5	56593.2	63533.8	71255.1	79527.7	88156.7	97038.2	106174	87179.3	125486	161225	176100	197949	217076	238577	261889	286534	312288	339236	8374.83	11932.7	15797.8	16812.7	18587	20510.3	22551	24634.5	26699.4	28706	30639.3	1354.57	1923.89	2521.69	2735.98	3057.92	3346.48	3669.06	4016.91	4382.53	4762.12	5156.36	0	0
North Nigeria				0	0	0	51653.2	59546.2	66461.5	74167.5	82425	91034.4	99895.5	109014	92362.5	132947	170810	186570	208278	227079	248328	271430	295887	321483	348310	8872.75	12642.1	16737.1	17812.3	19556.9	21455.4	23472.7	25531.9	27571	29551.3	31458.8	1435.1	2038.28	2671.62	2898.65	3217.48	3500.69	3819.02	4163.25	4525.59	4902.34	5294.28	0	0
Russia (North-West)				19618.2	20436.4	21201	22019.3	22955	23943.4	25110	26428.9	27857.4	29341.6	30812.7	64848.8	70448.9	83573.2	105216	129399	153939	181274	209626	236820	260577	278736	126255	175718	178206	185084	192949	201257	211063	222149	234156	246632	258997	22856	21900.1	19242.7	24226	29794	35444.4	41738.1	48266.1	54527.5	59997.6	64178.8	0	0
Russia (Center)				55331.1	57638.9	59795.2	62103.2	64742.2	67529.9	70820.3	74540.2	78569	82755	86904.1	182899	198694	235710	296752	364957	434170	511264	591228	667926	734930	786148	356090	495596	502611	522011	544193	567625	595282	626550	660414	695600	730475	64463.2	61767.1	54272	68326.9	84031	99967.3	117718	136130	153789	169217	181010	0	0
Russia (South)				33555.5	34955	36262.8	37662.4	39262.8	40953.4	42948.9	45204.8	47648.1	50186.7	52702.9	110919	120498	142946	179965	221328	263302	310055	358550	405063	445698	476759	215950	300554	304808	316573	330025	344235	361008	379971	400508	421846	442996	39093.6	37458.6	32913.2	41436.8	50960.5	60625.1	71390	82555.8	93265.5	102622	109773	0	0
Russia (Volga region)				42695.9	44476.7	46140.7	47921.6	49958	52109.1	54648.1	57518.5	60627.4	63857.4	67059.1	141133	153321	181884	228987	281617	335025	394514	456218	515402	567105	606627	274775	382424	387837	402807	419923	438004	459346	483474	509605	536755	563667	49742.6	47662.2	41878.7	52724.1	64842.1	77139.2	90836.5	105044	118671	130575	139675	0	0
Russia (Urals)				17442	18169.5	18849.3	19576.8	20408.7	21287.5	22324.7	23497.3	24767.3	26086.9	27394.8	57655.5	62634.4	74302.9	93545.2	115045	136863	161166	186373	210550	231672	247818	112250	156227	158438	164554	171546	178932	187651	197507	208182	219274	230268	20320.7	19470.9	17108.2	21538.7	26489.1	31512.7	37108.3	42912.2	48479.1	53342.4	57059.9	0	0
Russia (Siberia)				27616	28767.8	29844.1	30996	32313.1	33704.5	35346.8	37203.4	39214.2	41303.4	43374.2	91286	99169.2	117644	148110	182152	216696	255174	295085	333365	366807	392370	177726	247354	250855	260538	271609	283304	297108	312714	329616	347177	364583	32173.9	30828.2	27087.4	34102.3	41940.3	49894.2	58753.7	67943	76757.1	84457.1	90343	0	0
Russia (Far East)				8969.55	9343.66	9693.22	10067.4	10495.2	10947.1	11480.5	12083.5	12736.6	13415.2	14087.7	29649.3	32209.7	38210.2	48105.5	59162	70382	82879.4	95842.2	108275	119137	127440	57724.7	80339.5	81476.7	84621.5	88217.3	92015.9	96499.4	101568	107058	112762	118415	10449.9	10012.9	8797.87	11076.3	13622	16205.4	19082.9	22067.6	24930.3	27431.3	29343	0	0
India-East				39917.7	61634.2	104365	179991	274038	363490	465342	575218	720675	873963	1.02701e+06	218681	287029	400543	632830	889743	1.09989e+06	1.3226e+06	1.4813e+06	1.72615e+06	2.09958e+06	2.64866e+06	34985.4	50326.2	74067.1	109939	144210	167720	186736	200949	222068	244216	272324	48058.9	59248	85907.1	132773	182141	219619	255945	275628	305761	349456	407098	0	0
India-Central East				40772.7	62954.4	106600	183846	279908	371276	475309	587538	736111	892683	1.04901e+06	223365	293177	409122	646385	908801	1.12345e+06	1.35093e+06	1.51303e+06	1.76312e+06	2.14455e+06	2.70539e+06	35734.7	51404.2	75653.6	112293	147299	171312	190735	205253	226825	249446	278157	49088.3	60517	87747.2	135617	186043	224323	261427	281532	312310	356941	415818	0	0
India-West				39817.6	61479.6	104103	179539	273351	362578	464175	573775	718868	871771	1.02443e+06	218133	286309	399539	631243	887512	1.09713e+06	1.31929e+06	1.47758e+06	1.72182e+06	2.09431e+06	2.64202e+06	34897.6	50200	73881.4	109663	143848	167299	186267	200445	221511	243603	271641	47938.4	59099.4	85691.6	132440	181684	219068	255303	274937	304994	348579	406077	0	0
India-Central West				41547.8	64151.1	108627	187341	285229	378334	484345	598708	750105	909653	1.06895e+06	227611	298750	416900	658672	926077	1.14481e+06	1.37661e+06	1.54179e+06	1.79664e+06	2.18532e+06	2.75682e+06	36414	52381.3	77091.8	114428	150099	174569	194361	209155	231137	254188	283445	50021.4	61667.5	89415.2	138195	189579	228588	266397	286884	318247	363726	423722	0	0
India-North				8800.85	13588.8	23009.8	39683.4	60418.6	80140.4	102596	126821	158891	192687	226430	48213.7	63282.6	88309.7	139523	196166	242498	291601	326589	380573	462904	583963	7713.39	11095.7	16329.9	24238.7	31794.7	36978	41170.5	44304.2	48960.5	53843.4	60040.5	10595.8	13062.7	18940.4	29273.1	40157.5	48420.5	56429.5	60769	67412.5	77046.1	89754.8	0	0
India-North West				41582.2	64204.2	108717	187496	285465	378647	484746	599203	750726	910406	1.06983e+06	227800	298997	417245	659218	926844	1.14575e+06	1.37775e+06	1.54307e+06	1.79813e+06	2.18712e+06	2.7591e+06	36444.2	52424.7	77155.6	114523	150223	174714	194522	209328	231328	254399	283679	50062.8	61718.5	89489.3	138309	189736	228777	266618	287121	318510	364027	424073	0	0
India-Uttar Pradesh				59497.2	91865.5	155555	268275	408453	541780	693590	857359	1.07416e+06	1.30264e+06	1.53075e+06	325943	427815	597008	943230	1.32616e+06	1.63938e+06	1.97133e+06	2.20787e+06	2.57282e+06	3.12941e+06	3.94782e+06	52145.5	75011	110397	163863	214944	249986	278329	299514	330992	364002	405897	71631.5	88308.8	128044	197898	271481	327341	381485	410822	455735	520862	606777	0	0
India-South				31829.5	49145.7	83218.2	143521	218512	289839	371053	458666	574650	696879	818914	174372	228870	319384	504604	709462	877028	1.05461e+06	1.18115e+06	1.37639e+06	1.67416e+06	2.11198e+06	27896.5	40129	59059.5	87662.6	114990	133736	148899	160232	177072	194732	217145	38321.1	47243	68500.4	105870	145235	175119	204085	219780	243807	278648	324611	0	0
India-South Central				43463.3	67108.7	113635	195978	298379	395776	506675	626309	784686	951590	1.11823e+06	238105	312523	436120	689039	968772	1.19758e+06	1.44008e+06	1.61287e+06	1.87947e+06	2.28606e+06	2.88392e+06	38092.8	54796.3	80645.9	119704	157019	182617	203322	218798	241793	265907	296512	52327.6	64510.5	93537.5	144566	198319	239126	278679	300110	332919	380495	443257	0	0
India-NorthEast				13409.1	20704	35058	60462.1	92054.3	122103	156317	193226	242087	293580	344990	73458.9	96418.1	134549	212579	298880	369473	444285	497594	579845	705285	889731	11752.2	16905.5	24880.5	36930.3	48442.7	56340.1	62727.8	67502.3	74596.6	82036.3	91478.4	16143.8	19902.4	28857.7	44600.8	61184.4	73774	85976.5	92588.3	102710	117388	136751	0	0
Pakistan-South				10006.9	12149.7	12316	13973.4	16557.9	19543.1	24239	31681.8	43209.1	60300.7	84328.5	64303.1	86965.8	102187	106381	117952	133043	158175	199118	263160	358359	492498	16771	20764.1	23255.2	23167.7	24763.6	26591.2	29216.8	33228.1	39572.9	49628.8	65217	5191.23	6045.75	6824.08	6968.35	7633.67	8379.27	9482.44	11183.9	13839	17886.2	23736.5	0	0
Pakistan-North				26721.3	32443.2	32887.2	37312.9	44214.2	52185.7	64725	84599.5	115381	161020	225181	171708	232224	272868	284069	314965	355264	422373	531703	702714	956922	1.31511e+06	44783.3	55446.1	62098.1	61864.4	66126	71006.1	78017.3	88728.5	105671	132523	174148	13862.1	16143.9	18222.3	18607.5	20384.1	22375.1	25320.9	29864.1	36954	47761.3	63383.4	0	0
Canada-West				65268.5	87816.1	82501.2	87397.7	90674.3	95158.7	100239	105907	112089	118673	125526	160749	176068	189473	216863	238590	261343	285998	312031	338664	365102	390643	102776	112221	95494.9	101163	104955	110146	116026	122587	129742	137363	145296	499.87	476.671	455.83	501.081	531.593	564.414	595.386	622.036	642.213	654.343	657.346	0	0
Canada-East				139545	187752	176389	186858	198858	208693	219834	232265	245822	260261	275291	343683	376436	405096	463657	523253	573151	627224	684317	742724	800707	856721	219737	239929	204169	216287	230178	241561	254457	268846	284538	301251	318649	1068.73	1019.13	974.57	1071.32	1165.84	1237.82	1305.74	1364.19	1408.44	1435.04	1441.63	0	0
Mexico-Noroeste (Northwest)				15776.7	16595.7	17354.5	19942.4	22612.9	25189.1	28227.3	31810	36026.6	40959	46661.8	49164.3	59291	72155.7	81626.9	91479.6	101011	112294	125605	141218	159327	179957	2342.29	2676.34	2988.22	3269.99	3583.85	3911.74	4307.54	4791.97	5392.75	6146.54	7100.75	9.83483	5.92969	64.9987	72.0869	79.3145	86.1783	94.0154	102.865	112.693	123.327	134.387	0	0
Mexico-Noreste (North)				26967.7	28367.6	29664.6	34088.3	38653	43056.5	48249.9	54373.9	61581.5	70012.6	79760.6	84038.3	101348	123338	139528	156369	172662	191948	214702	241389	272343	307606	4003.75	4574.75	5107.87	5589.51	6126	6686.47	7363.03	8191.08	9218.01	10506.5	12137.6	16.811	10.1358	111.104	123.221	135.575	147.308	160.704	175.831	192.631	210.806	229.712	0	0
Mexico-Centro-Occidente (Center)				44589.5	46904.2	49048.7	56362.9	63910.5	71191.5	79778.5	89904.1	101821	115762	131880	138952	167573	203933	230701	258547	285487	317375	354997	399123	450304	508609	6619.97	7564.09	8445.56	9241.93	10129	11055.7	12174.3	13543.5	15241.4	17371.9	20068.8	27.796	16.759	183.705	203.738	224.165	243.564	265.714	290.727	318.503	348.556	379.816	0	0
Mexico-Centro & Sur-Sureste (South)				104226	109637	114649	131746	149388	166407	186479	210147	238004	270589	308263	324796	391696	476684	539254	604344	667315	741852	829790	932935	1.05257e+06	1.18885e+06	15473.9	17680.8	19741.2	21602.6	23676.1	25842.3	28457.1	31657.3	35626.3	40606.1	46909.9	64.9721	39.1735	429.402	476.23	523.977	569.322	621.097	679.563	744.489	814.736	887.805	0	0
US-New England & New York				186974	203432	212428	226612	241248	256088	272054	288996	306716	324978	343546	744775	801519	687843	764896	841308	915572	991266	1.06669e+06	1.1401e+06	1.20991e+06	1.27512e+06	242234	270566	242557	258753	275464	292410	310640	329985	350218	371070	392271	5174.66	5325.17	6176.78	6602.46	6978.09	7294.69	7547.7	7718.9	7794.07	7763.67	7629.16	0	0
US-Mid-Atlantics				273790	297890	311064	331833	353265	374996	398375	423184	449132	475873	503062	1.09059e+06	1.17368e+06	1.00722e+06	1.12006e+06	1.23195e+06	1.34069e+06	1.45153e+06	1.56197e+06	1.66948e+06	1.7717e+06	1.86718e+06	354709	396196	355183	378898	403369	428182	454877	483204	512833	543367	574412	7577.37	7797.77	9044.8	9668.14	10218.2	10681.8	11052.3	11303	11413	11368.5	11171.6	0	0
US-Carolinas				80907.3	88028.9	91922	98059.5	104393	110814	117723	125054	132722	140624	148659	322279	346833	297643	330986	364051	396186	428940	461576	493345	523553	551767	104819	117079	104959	111967	119199	126531	134420	142791	151546	160569	169743	2239.18	2304.31	2672.81	2857.01	3019.56	3156.56	3266.04	3340.12	3372.65	3359.49	3301.29	0	0
US-Southern				191424	208274	217485	232006	246990	262184	278529	295875	314017	332713	351723	762503	820596	704215	783103	861333	937365	1.01486e+06	1.09207e+06	1.16724e+06	1.23871e+06	1.30547e+06	247999	277006	248331	264912	282021	299370	318034	337839	358554	379903	401608	5297.82	5451.92	6323.8	6759.61	7144.18	7468.32	7727.35	7902.62	7979.59	7948.46	7810.76	0	0
US-TVA				59712	64968	67841.2	72370.8	77044.9	81784.4	86883.2	92293.8	97952.9	103785	109715	237852	255973	219670	244277	268680	292397	316571	340657	364103	386398	407221	77359.8	86407.9	77463.2	82635.3	87972.3	93384	99206	105384	111846	118505	125276	1652.58	1700.65	1972.62	2108.56	2228.52	2329.63	2410.44	2465.11	2489.12	2479.41	2436.45	0	0
US-Midwest				278842	303386	316803	337956	359783	381915	405725	430992	457418	484654	512344	1.11071e+06	1.19534e+06	1.02581e+06	1.14072e+06	1.25468e+06	1.36543e+06	1.47832e+06	1.59079e+06	1.70028e+06	1.80439e+06	1.90163e+06	361253	403506	361736	385889	410811	436083	463270	492120	522295	553393	585010	7717.18	7941.65	9211.68	9846.52	10406.7	10878.9	11256.2	11511.5	11623.6	11578.3	11377.7	0	0
US-Central				47221.8	51378.4	53650.6	57232.8	60929.1	64677.2	68709.5	72988.3	77463.7	82076	86765.3	188099	202430	173721	193181	212479	231235	250353	269400	287942	305573	322041	61178.2	68333.6	61259.9	65350.2	69570.8	73850.5	78454.7	83340.4	88450.6	93717	99071.4	1306.9	1344.92	1560	1667.51	1762.37	1842.34	1906.24	1949.47	1968.46	1960.78	1926.81	0	0
US-Texas				148769	161864	169022	180308	191953	203761	216464	229945	244044	258575	273348	592593	637742	547294	608603	669401	728491	788718	848726	907142	962687	1.01457e+06	192737	215280	192995	205881	219178	232661	247166	262558	278657	295249	312117	4117.3	4237.06	4914.66	5253.36	5552.24	5804.15	6005.46	6141.67	6201.48	6177.3	6070.27	0	0
US-Southwest				48272.5	52521.6	54844.3	58506.2	62284.8	66116.3	70238.4	74612.4	79187.3	83902.3	88695.9	192284	206934	177586	197479	217207	236380	255923	275395	294349	312373	329207	62539.4	69854	62623	66804.2	71118.7	75493.7	80200.4	85194.8	90418.6	95802.2	101276	1335.98	1374.84	1594.71	1704.61	1801.59	1883.33	1948.65	1992.85	2012.26	2004.41	1969.68	0	0
US-Northwest				143460	156088	162991	173873	185103	196490	208740	221739	235335	249347	263593	571447	614984	527764	586885	645514	702494	760572	818440	874771	928334	978362	185860	207598	186108	198534	211356	224358	238346	253189	268713	284713	300979	3970.38	4085.86	4739.28	5065.89	5354.1	5597.02	5791.15	5922.51	5980.19	5956.86	5853.66	0	0
US-California				212003	230664	240865	256947	273542	290369	308472	327682	347774	368481	389534	844474	908813	779921	867289	953929	1.03813e+06	1.12396e+06	1.20948e+06	1.29272e+06	1.37188e+06	1.44581e+06	274660	306785	275027	293390	312339	331553	352223	374158	397100	420744	444782	5867.36	6038.02	7003.63	7486.29	7912.2	8271.19	8558.07	8752.18	8837.42	8802.95	8650.44	0	0
US-Alaska				3999.24	4351.26	4543.69	4847.07	5160.12	5477.55	5819.02	6181.4	6560.47	6951.06	7348.2	15930.2	17143.9	14712.5	16360.6	17995	19583.4	21202.4	22815.6	24386.1	25879.2	27273.8	5181.2	5787.2	5188.13	5534.53	5891.98	6254.44	6644.35	7058.11	7490.95	7936.94	8390.4	110.682	113.901	132.117	141.222	149.256	156.028	161.439	165.101	166.71	166.06	163.182	0	0
US-Hawaii				7753.35	8435.82	8808.89	9397.04	10004	10619.4	11281.5	11984	12718.8	13476.1	14246.1	30884	33237	28523.2	31718.4	34887.2	37966.6	41105.6	44232.8	47277.3	50172.3	52876.1	10044.8	11219.7	10058.3	10729.8	11422.9	12125.5	12881.5	13683.7	14522.7	15387.5	16266.6	214.58	220.822	256.136	273.788	289.366	302.493	312.986	320.084	323.201	321.942	316.364	0	0
US-Gulf				57631.6	62704.5	65477.5	69849.4	74360.6	78935	83856.2	89078.3	94540.2	100169	105892	229565	247055	212016	235767	259319	282210	305541	328788	351418	372935	393033	74664.5	83397.4	74764.3	79756.2	84907.3	90130.5	95749.6	101712	107949	114376	120911	1595	1641.4	1903.89	2035.1	2150.88	2248.47	2326.45	2379.22	2402.39	2393.02	2351.56	0	0
China (North-East)				52223.6	81399.5	142398	172036	206714	233735	267353	307912	354713	405151	454186	379772	520617	717377	897473	1.1401e+06	1.33866e+06	1.58874e+06	1.88867e+06	2.22613e+06	2.57282e+06	2.8848e+06	110458	159108	223644	249791	288484	322157	366589	423627	494657	579822	677143	28993.6	42637.7	58753.1	68864.7	82023.6	92074.1	103572	115457	125848	132074	131336	0	0
China (North)				124272	193699	338851	409377	491896	556197	636195	732709	844078	964098	1.08078e+06	903708	1.23886e+06	1.70707e+06	2.13563e+06	2.71299e+06	3.18548e+06	3.78058e+06	4.49429e+06	5.29731e+06	6.1223e+06	6.86469e+06	262846	378614	532185	594403	686477	766607	872337	1.00806e+06	1.17709e+06	1.37975e+06	1.61133e+06	68993.3	101461	139809	163871	195184	219100	246462	274743	299469	314283	312528	0	0
China (East)				120402	187667	328299	396629	476579	538877	616384	709892	817793	934076	1.04713e+06	875566	1.20028e+06	1.65392e+06	2.06913e+06	2.62851e+06	3.08628e+06	3.66286e+06	4.35434e+06	5.13235e+06	5.93165e+06	6.65092e+06	254661	366823	515613	575893	665100	742735	845173	976672	1.14043e+06	1.33678e+06	1.56116e+06	66844.9	98301.3	135455	158768	189106	212277	238787	266187	290144	304496	302796	0	0
China (Central)				176800	275573	482081	582417	699818	791298	905111	1.04242e+06	1.20086e+06	1.37162e+06	1.53762e+06	1.2857e+06	1.76252e+06	2.42864e+06	3.03835e+06	3.85975e+06	4.53196e+06	5.37861e+06	6.394e+06	7.53644e+06	8.71015e+06	9.76635e+06	373950	538651	757136	845653	976646	1.09065e+06	1.24107e+06	1.43416e+06	1.67463e+06	1.96296e+06	2.29243e+06	98156.3	144348	198905	233138	277686	311712	350639	390874	426053	447128	444632	0	0
China (South)				117672	183411	320855	387635	465772	526658	602408	693795	799250	912896	1.02338e+06	855713	1.17307e+06	1.61641e+06	2.02221e+06	2.56891e+06	3.0163e+06	3.5798e+06	4.25561e+06	5.01597e+06	5.79715e+06	6.50011e+06	248887	358506	503921	562835	650019	725894	826008	954526	1.11457e+06	1.30647e+06	1.52576e+06	65329.1	96072.3	132384	155168	184818	207464	233372	260151	283565	297592	295930	0	0
China (Tibet)				35622.7	55524.1	97132.4	117349	141003	159435	182367	210033	241957	276361	309809	259050	355123	489337	612184	777685	913125	1.08371e+06	1.2883e+06	1.51848e+06	1.75497e+06	1.96778e+06	75345.5	108530	152552	170387	196780	219750	250057	288964	337415	395508	461892	19777.1	29084	40076.6	46973.9	55949.8	62805.5	70648.8	78755.6	85843.5	90089.9	89587	0	0
China (North-West)				1431.54	2231.3	3903.38	4715.8	5666.4	6407.1	7328.64	8440.43	9723.33	11105.9	12450.1	10410.2	14271	19664.6	24601.3	31252.3	36695	43550.4	51771.9	61022.2	70525.9	79077.6	3027.85	4361.43	6130.49	6847.21	7907.87	8830.91	10048.9	11612.4	13559.4	15894	18561.7	794.766	1168.77	1610.53	1887.7	2248.42	2523.92	2839.11	3164.89	3449.73	3620.38	3600.16	0	0
China (Uigur region)				10401.4	16212.4	28361.5	34264.4	41171.3	46553.2	53248.9	61327	70648.5	80694.1	90460.6	75639.5	103692	142880	178750	227075	266621	316431	376168	443380	512431	574568	22000	31689.6	44543.4	49751	57457.5	64164.3	73013.8	84374	98521.2	115484	134867	5774.67	8492.17	11701.9	13715.8	16336.7	18338.5	20628.6	22995.7	25065.3	26305.2	26158.3	0	0
Japan East				157535	168555	168183	167461	165487	162322	158347	153882	149198	144567	140182	517624	506117	452328	450879	446918	440567	432593	423632	414234	404944	396144	11132	11525.1	10763.7	10717.5	10591.1	10388.6	10134.2	9848.43	9548.65	9252.31	8971.65	193496	196921	198223	197588	195852	193069	189574	185648	181529	177458	173602	0	0
Japan West				155482	166358	165991	165279	163330	160206	156284	151876	147253	142683	138355	510878	499521	446433	445003	441093	434825	426954	418111	408835	399666	390981	10986.9	11374.9	10623.4	10577.8	10453.1	10253.2	10002.1	9720.07	9424.19	9131.72	8854.71	190974	194354	195639	195013	193299	190553	187103	183228	179163	175145	171339	0	0
Argentina Northeast (includes Uruguay)				11115.5	11238.1	13570.7	17771.3	21568.1	25241.2	29044.5	32591.5	35828.4	39038.3	42639.4	62096.1	65975.4	80568.8	99031.6	114552	129500	144319	157275	168376	179133	191480	4443.1	4247.76	4132.29	5004.71	5743.02	6489.96	7217.77	7846.51	8391.04	8946.97	9638.15	513.398	485.162	453.726	547.498	623.19	695.585	763.869	818.442	859.249	893.765	930.783	0	0
Argentina East				18243.8	18444.9	22273.5	29167.9	35686	42072	48745.4	55058.4	60909.8	66769.6	73348.6	101918	108285	132237	162540	189535	215851	242211	265692	286246	306381	329386	7292.42	6971.81	6782.3	8214.18	9502.23	10817.4	12113.6	13255.5	14265.1	15302.5	16579.6	842.636	796.293	744.696	898.603	1031.11	1159.4	1282	1382.64	1460.76	1528.66	1601.14	0	0
Argentina West				13293.9	13440.5	16230.3	21254.1	26003.7	30657.1	35519.9	40120.1	44383.9	48653.8	53447.8	74265.7	78905.3	96358.6	118440	138111	157287	176495	193605	208582	223255	240017	5313.86	5080.24	4942.14	5985.53	6924.1	7882.48	8826.95	9659.05	10394.7	11150.7	12081.3	614.013	580.245	542.647	654.796	751.352	844.834	934.17	1007.5	1064.43	1113.91	1166.72	0	0
Brazil South				54115.1	72451.6	104035	112986	123818	131713	140906	151603	164032	178411	194827	161805	165811	207586	232422	260317	289282	324431	366667	416827	475510	542602	22157.1	31724.9	38205.9	36852.7	34523.2	35519.3	37186.9	39744.7	43470.7	48725.5	55978.8	40.3063	41.3041	51.7103	56.5304	61.8568	67.2649	73.5785	80.7963	88.8302	97.4455	106.156	0	0
Brazil São Paulo				82125.9	109954	157885	171469	187908	199890	213840	230075	248938	270759	295672	245558	251638	315036	352728	395061	439019	492362	556460	632582	721642	823461	33625.9	48146.2	57981.9	55928.2	52392.9	53904.6	56435.4	60317.1	65971.7	73946.5	84954.2	61.1694	62.6838	78.4764	85.7915	93.8748	102.082	111.664	122.618	134.81	147.885	161.104	0	0
Brazil Southeast				76614.8	102575	147290	159963	175298	186476	199491	214635	232233	252589	275831	229080	234752	293895	329058	368550	409559	459322	519119	590133	673216	768203	31369.4	44915.4	54091.1	52175.1	48877.1	50287.3	52648.3	56269.5	61544.7	68984.3	79253.4	57.0646	58.4774	73.2102	80.0344	87.5753	95.2321	104.171	114.389	125.764	137.961	150.294	0	0
Brazil North				60520.5	81027.4	116349	126359	138473	147304	157584	169547	183448	199528	217888	180958	185438	232157	259933	291129	323523	362833	410068	466165	531795	606828	24779.7	35480.1	42728.2	41214.8	38609.5	39723.5	41588.5	44449.1	48616.1	54492.9	62604.8	45.0771	46.1931	57.8311	63.2217	69.1785	75.2268	82.2876	90.3598	99.3447	108.98	118.722	0	0
Brazil Northeast				104787	140294	201451	218783	239758	255047	272846	293560	317629	345470	377259	313317	321073	401965	450058	504072	560160	628222	710007	807134	920768	1.05068e+06	0	61431.5	73981.2	71360.7	66849.9	68778.7	72007.9	76960.7	84175.7	94351	108396	78.0482	79.9804	100.131	109.464	119.778	130.25	142.476	156.452	172.009	188.691	205.559	0	0
Australia East				122806	152444	163794	173473	181250	185649	190649	196291	202576	209503	217080	227128	247736	251113	305938	348354	371494	397585	426662	458544	493004	529812	120615	166543	199144	210912	220368	225715	231795	238655	246296	254718	263930	9376.52	10227.3	10366.7	12082.6	13381.5	14168.3	14996	15854.1	16730.1	17608	18463	0	0
Australia West				16583.9	20586.2	22119	23426	24476.3	25070.2	25745.5	26507.4	27356.2	28291.5	29314.7	30671.6	33454.6	33910.6	41314.3	47042.2	50167	53690.5	57617	61922.4	66575.9	71546.4	16288	22490.2	26892.7	28481.8	29758.7	30480.9	31301.9	32228.2	33260.2	34397.4	35641.4	1266.22	1381.11	1399.93	1631.65	1807.05	1913.31	2025.08	2140.96	2259.25	2377.81	2493.26	0	0
Indonesia-Papua+Papua New Guinea				4104.08	4919.92	5573.97	6813.96	8406.51	9960.47	11865.4	14247.7	16932.6	20243.5	24363.7	26372.4	35216.1	46247.7	51875.8	59884.8	67807.9	77429.4	89546.1	103126	120305	142289	6878.21	8408.25	10524.8	11297.5	12538	13872.6	15475.6	17425.5	19435.6	21831.3	24751	2129.06	2448.18	3088.45	3398.05	3866.25	4362.6	4978	5740.91	6550.39	7494.12	8581.52	0	0
Indonesia Sumatra				19488	23361.9	26467.6	32355.7	38879.3	44679.2	51485.1	59747.2	69489.8	81670.8	97038.8	125228	167222	219605	246329	276961	304163	335973	375508	423220	485359	566728	32660.8	39926.1	49976.6	53645.5	57987.1	62227.7	67150.1	73072.9	79762.1	88076.3	98581.7	10109.7	11625	14665.3	16135.4	17881	19569.1	21600	24074.3	26882.2	30234.3	34179.6	0	0
Indonesia Java+Timor Leste				56566.5	67811.1	76825.8	93916.7	110610	125102	142172	162698	189301	222570	264540	363490	485382	637431	715002	787945	851654	927761	1.02255e+06	1.15292e+06	1.3227e+06	1.54497e+06	94802.2	115891	145064	155713	164972	174237	185429	198986	217285	240026	268746	29344.8	33743.2	42568	46835.2	50870.9	54793.5	59646.6	65556.9	73231.5	82394.8	93177.8	0	0
East Indonesia				13015.7	15603	17677.3	21609.8	26087.5	30165.2	34996.6	40891.1	47558.9	55895.6	66413.5	83637.4	111684	146670	164519	185837	205356	228376	256998	289653	332180	387870	21813.6	26665.9	33378.5	35828.9	38908.6	42013.1	45644.8	50011.2	54589.3	60279.5	67469.4	6752.1	7764.15	9794.7	10776.6	11997.9	13212.1	14682.5	16476.5	18398.2	20692.4	23392.5	0	0
West Malaysia+Singapore				23338.2	27993.8	29865.3	35627.6	40385	43584	46784.9	50097.5	53853.4	58553.1	64814	149969	200376	247795	271238	287687	296707	305302	314860	327989	347973	378528	39113.6	47842	56392.1	59070.2	62474.7	65571.2	68875	72361.5	76054.7	80062	84634.2	12107.1	13929.9	16547.9	17767.1	19183.4	20450.5	21843.8	23329.2	24881.9	26501.5	28221.9	0	0
East Malaysia+Brunei				5350.5	6417.82	6846.88	8167.94	9237.64	10001.5	10777.9	11595.6	12534.5	13713.3	15279.7	34381.7	45937.8	56809.2	62183.8	65805.4	68087.2	70332.9	72878	76339.8	81496.3	89236.6	8967.13	10968.2	12928.4	13542.4	14290.4	15047.1	15866.8	16748.9	17701.8	18750.7	19952.2	2775.65	3193.54	3793.75	4073.26	4388	4692.92	5032.19	5399.81	5791.3	6206.72	6653.2	0	0
[truncated: 625 more columns]

## Sheet: Mobility Efficiency
	Rail, Aviation, Marine Efficiency (Specific Energy Consumption/Energy Intensity)																																																Passenger

Segment	Types and Fuel	C & E	Specification		UNIT	1975	1980	1985	1990	1995	2000	2005	2010	2012	2015	2020	2025	2030	2035	2040	2045	2050
Rail (Train)	Passenger, electric	Cost / Lifetime	Capex												3300000	3300000	3300000	3300000	3300000	3300000	3300000	3300000		Gattuso & Restuccia 2013						3.6	kWh
			Opex fix
			Opex var																											0.049986
			Lifeteime												40	40	40	40	40	40	40	40		TOSCA Vehicle Stock and Emissions, page 15
		Efficiency	Efficiency - new		MJ,el/p-km				Train passenger, electric				0.254		0.24475	0.2355	0.22625	0.217	0.20775	0.1985	0.18925	0.18	MJ,el/p-km	TOSCA, 2011, Tab. 10			The combination of six technology				0.18	Combination + Higher speed
			Efficiency - new		kWh,el/p-km										0.0679861	0.0654167	0.0628472	0.0602778	0.0577083	0.0551389	0.0525694	0.05	kWh,el/p-km
			Efficiency - old			0.12	0.12	0.11	0.11	0.1	0.1	0.1	0.09		0.09	0.09	0.08	0.07	0.07	0.06	0.06	0.05		IEA UIC 2015 annual improvement 1975-2012 0,7 %. Assuming constant load factor.
	Passenger, diesel	Cost / Lifetime	Capex												3450000	3450000	3450000	3450000	3450000	3450000	3450000	3450000		Gattuso & Restuccia 2013
			Opex fix
			Opex var
			Lifeteime												40	40	40	40	40	40	40	40		TOSCA Vehicle Stock and Emissions, page 15
		Efficiency	Efficiency - new		MJ,th/p-km				Train passenger, diesel				0.384		0.378453	0.372906	0.367358	0.361811	0.356264	0.350717	0.34517	0.339623	MJ,th/p-km	TOSCA, 2011, Tab. 10					Energy reduction of 45-50%			0.339623
			Efficiency - new		kWh,th/p-km										0.105126	0.103585	0.102044	0.100503	0.0989623	0.0974214	0.0958805	0.0943396	kWh,th/p-km
			Efficiency - old			0.32	0.31	0.29	0.27	0.25	0.24	0.23	0.21		0.2	0.19	0.17	0.16	0.14	0.13	0.12	0.1		IEA UIC annual improvement 1975-2012 about 36 %. Annual improvement 1,20 %. Assuming constant load factor.
	Freight, electric	Cost / Lifetime	Capex
			Opex fix
			Opex var
			Lifeteime												40	40	40	40	40	40	40	40		TOSCA Vehicle Stock and Emissions, page 15
		Efficiency	Efficiency - new		MJ,el/t-km				Train freight, electric				0.13		0.1225	0.115	0.1075	0.1	0.0925	0.085	0.0775	0.07	MJ,el/t-km	TOSCA, 2011, Tab. 13
			Efficiency - new		kWh,el/t-km										0.0340278	0.0319444	0.0298611	0.0277778	0.0256944	0.0236111	0.0215278	0.0194444	kWh,el/t-km
			Efficiency - old			0.05	0.05	0.05	0.04	0.04	0.04	0.04	0.04		0.04	0.04	0.03	0.03	0.03	0.03	0.03	0.02		IEA UIC 2015 annual improvement 1975-2012 0,7 %. Assuming constant load factor.
	Freight, diesel	Cost / Lifetime	Capex
			Opex fix
			Opex var
			Lifeteime												40	40	40	40	40	40	40	40		TOSCA Vehicle Stock and Emissions, page 15
		Efficiency	Efficiency - new		MJ,th/p-km				Train freight, diesel				0.24		0.2325	0.225	0.2175	0.21	0.2025	0.195	0.1875	0.18	MJ,th/t-km	TOSCA, 2011, Tab. 13								0.339623
			Efficiency - new		kWh,th/p-km										0.0645833	0.0625	0.0604167	0.0583333	0.05625	0.0541667	0.0520833	0.05	kWh,th/t-km
			Efficiency - old			0.1	0.1	0.1	0.1	0.1	0.1	0.1	0.1		0.1	0.09	0.09	0.08	0.08	0.07	0.06	0.06		IEA UIC 2015 page 81. Has remain close to constant. Assuming constant load factor, bad assumption?
Marine (Ship)	Marine, passenger	Cost / Lifetime	Capex
			Opex fix
			Opex var
			Lifeteime												30	30	30	30	30	30	30	30		TOSCA Vehicle Stock and Emissions, page 15
		Efficiency	Efficiency - new ICE (diesel, LNG)		MJ,th/p-km				Marine, passenger				2.53167	2.49864	2.44911	2.36656	2.284	2.20145	2.17803	2.15461	2.13217	2.10972	MJ,th/p-km	Becken S.,IMO, ADB for Asian ferries, efficiency scaling similar to freight ships due to comparable drives see table Marine pkm ref table Marine pkm ref
			Efficiency - new ICE (diesel, LNG)		kWh,th/p-km										0.680309	0.657377	0.634445	0.611514	0.605008	0.598503	0.592268	0.586034	kWh,th/p-km
			Efficiency - new, BEV		MJ,el/p-km										1.13294	1.14948	1.16221	1.17113	1.17126	1.17113	1.17126	1.17113	MJ,el/p-km	see other table; only for domestic
			Efficiency - new, BEV		kWh,el/p-km										0.314705	0.319301	0.322837	0.325313	0.32535	0.325313	0.325349	0.325313	kWh,el/p-km
			Efficiency - new FCEV (H2)		MJ,H2/p-km													2.03643	1.87728	1.74082	1.69989	1.66048	MJ,H2/p-km	see other table; only for domestic
			Efficiency - new FCEV (H2)		kWh,H2/p-km													0.565676	0.521466	0.483561	0.472191	0.461243	kWh,H2/p-km
	Marine, freight	Cost / Lifetime	Capex
			Opex fix
			Opex var
			Lifeteime												30	30	30	30	30	30	30	30		TOSCA Vehicle Stock and Emissions, page 15
		Efficiency	Efficiency - new ICE (diesel, LNG)		MJ,th/t-km				Marine, freight				0.156767	0.154723	0.151655	0.146543	0.141432	0.13632	0.134869	0.133419	0.132029	0.13064	MJ,th/t-km	IMO, DNV*GL, IMO; in 2010: 40% ICE efficiency; in 2030 46%, in 2040 47%, ref.: Hovarth et al., 2017
			Efficiency - new ICE (diesel, LNG)		kWh,th/t-km										0.0421265	0.0407065	0.0392865	0.0378665	0.0374637	0.0370609	0.0366748	0.0362888	kWh,th/t-km
			Efficiency - new BEV		MJ,el/t-km										0.0701544	0.0711791	0.0719674	0.0725192	0.0725275	0.0725192	0.0725272	0.0725192	MJ,el/t-km	see other table; only for domestic
			Efficiency - new BEV		kWh,el/t-km										0.0194873	0.019772	0.0199909	0.0201442	0.0201465	0.0201442	0.0201464	0.0201442	kWh,el/t-km
			Efficiency - new FCEV (H2)		MJ,H2/t-km													0.126101	0.116246	0.107796	0.105262	0.102821	MJ,H2/t-km	see other table; only for domestic
			Efficiency - new FCEV (H2)		kWh,H2/t-km													0.0350281	0.0322905	0.0299434	0.0292393	0.0285614	kWh,H2/t-km
Aviation (Airpalne)	Aviation, passenger	Cost / Lifetime	Capex												100000000	100000000	100000000	100000000	100000000	100000000	100000000	100000000		Airbus A320, Boeing 737 class						However in the 1990s efficiency has been even better than today. Despite this let's assume constant annual efficiency increase of 1 % also in the past.
			Opex fix
			Opex var
			Lifeteime												30	30	30	30	30	30	30	30		TOSCA Vehicle Stock and Emissions, page 15
		Efficiency	Efficiency - new ICE (kerosene)		MJ,th/p-km				Aviation, passenger				2.068		1.96073	1.85998	1.76498	1.67571	1.58982	1.50956	1.43234	1.35818	MJ,th/p-km	ICCT, main calc reference
			Efficiency - new ICE (kerosene)		kWh,th/p-km										0.544646	0.516662	0.490271	0.465475	0.441616	0.419323	0.397873	0.377273	kWh,th/p-km
			Efficiency - new, BEV		MJ,el/p-km										0.735272	0.697494	0.661866	0.628391	0.596181	0.566086	0.537129	0.509319	MJ,el/p-km	Mueller2018_Design considerations for the elec power supply of future civil aircraft with active hihg-lift-sys_aviation_BEV-plane_Energies
			Efficiency - new, BEV		kWh,el/p-km										0.204242	0.193748	0.183852	0.174553	0.165606	0.157246	0.149203	0.141477	kWh,el/p-km	from	0.3	to	0.8
			Efficiency - new FCEV (H2)		MJ,H2/p-km										1.41059	1.33812	1.26977	1.20555	1.14375	1.08602	1.03046	0.97711	MJ,H2/p-km	Mueller2018_Design considerations for the elec power supply of future civil aircraft with active hihg-lift-sys_aviation_BEV-plane_Energies
			Efficiency - new FCEV (H2)		kWh,H2/p-km										0.391832	0.371699	0.352713	0.334874	0.317709	0.301671	0.28624	0.271419	kWh,H2/p-km	from	0.3	to	0.417
			Efficiency-OLD					0.723887	0.6712	0.622348	0.577051	0.535051	0.496109		0.46	0.45	0.44	0.43	0.41	0.4	0.39	0.38		Fleet Peeters et al. 2005, page 13: 1980-2000 20%/26% reduction in MJ/available seat-km. Let's take 26 % beacause increase in load factor ->1,5 % annual reduction
	Aviation, freight	Cost / Lifetime	Capex												220000000	220000000	220000000	220000000	220000000	220000000	220000000	220000000		Airbus A330, Boeing 767 freighter class
			Opex fix
			Opex var
			Lifeteime												30	30	30	30	30	30	30	30		TOSCA Vehicle Stock and Emissions, page 15
		Efficiency	Efficiency - new ICE (kerosene)		MJ,th/t-km				Aviation, freight			0.538	0.538		0.510398	0.484173	0.459442	0.436205	0.413846	0.392955	0.372854	0.353549	MJ,th/t-km	ICCT, main calc reference; EC report, Fuel and air transport for EC by Cranfield University
			Efficiency - new ICE (kerosene)		kWh,th/t-km										0.141777	0.134493	0.127623	0.121168	0.114957	0.109154	0.103571	0.0982081	kWh,th/t-km
			Efficiency - new, BEV		MJ,el/t-km										0.191399	0.181565	0.172291	0.163577	0.155192	0.147358	0.13982	0.132581	MJ,el/t-km	Mueller2018_Design considerations for the elec power supply of future civil aircraft with active hihg-lift-sys_aviation_BEV-plane_Energies
			Efficiency - new, BEV		kWh,el/t-km										0.0531664	0.0504347	0.0478585	0.045438	0.0431089	0.0409328	0.038839	0.0368281	kWh,el/t-km	from	0.3	to	0.8
			Efficiency - new FCEV (H2)		MJ,H2/t-km										0.367192	0.348326	0.330534	0.313816	0.297731	0.282701	0.268241	0.254352	MJ,H2/t-km	Mueller2018_Design considerations for the elec power supply of future civil aircraft with active hihg-lift-sys_aviation_BEV-plane_Energies
			Efficiency - new FCEV (H2)		kWh,H2/t-km										0.101998	0.0967573	0.0918149	0.0871712	0.082703	0.0785281	0.0745113	0.0706533	kWh,H2/t-km	from	0.3	to	0.417
			Efficiency-OLD					0.110157	0.102139	0.0947051	0.0878121	0.0814209	0.0754948		0.07	0.07	0.06	0.06	0.06	0.05	0.05	0.05		Same assumption as in Aviation, passenger
																																																	Freight

[truncated: 13 more columns]

## Sheet: Road LCOM
		Christian		UNIT	2015	2020	2025	2030	2035	2040	2045	2050
	Annual kilometers per CAR			km/a	14602.9	14004.1	13357	12993.5	12727.7	12467.8	12217.2	11970.9
	Annual kilometers per BUS			km/a	64744	67178	68853.5	70809.7	72609.6	74503	76293.5	77464.9
	Annual kilometers per 2W/3W			km/a	7223.75	7379.97	7452.51	7493.8	7434.61	7427.29	7479.76	7701.88
	Annual kilometers per MDV (LHDT,MHDT)			km/a	22865.3	23332.2	24613.6	25389.2	26154	26631.2	27140.4	27600.6
	Annual kilometers per HDV			km/a	54541.2	53520.6	52941	52582	52188.3	51747.2	51312.3	50866
	Elec price excl. Distribution			€/kWh,el	0.07	0.0665693	0.0633067	0.0602041	0.0572535	0.0544475	0.051779	0.0492413
	Elec price incl. Distribution			€/kWh,el	0.09282	0.0882709	0.0839447	0.0798306	0.0759181	0.0721974	0.068659	0.065294
	Fuel price			€/l	0.7	0.754099	0.812379	0.875162	0.942799	1.01566	1.09416	1.17872
		Fuel price excl. distribution		€/kWh,th	0.07	0.0754099	0.0812379	0.0875162	0.0942799	0.101566	0.109416	0.117872
	Fuel price incl. distribution			€/kWh,th	0.07896	0.0850623	0.0916363	0.0987183	0.106348	0.114567	0.123421	0.132959
		H2 price excl. distribution		€/kWh,H2	0.138663	0.129895	0.119529	0.110312	0.10444	0.0990531	0.093894	0.0891971
	H2 price incl. distribution			€/kWh,H2	0.181371	0.169902	0.156344	0.144288	0.136608	0.129561	0.122813	0.11667
	CO2 price			€/t	9	28	52	61	68	75	100	150
rem.:	electrolyser		capex	€/kW,H2,output	800	685	500	363	324.789	296.132	267.474	248.368
			opex, fix	€/(kW,H2,output*a)	32	27.4	20	12.705	11.3676	10.3646	9.36158	8.69289
			opex, var	€/(kWh,H2*a)	0.0012	0.0012	0.0012	0.0012	0.0012	0.0012	0.0012	0.0012
			liefetime	a	30	30	30	30	30	30	30	30
			LCOH2	€/kWh,H2	0.0226376	0.0195559	0.0145985	0.010524	0.0095425	0.0088064	0.00807029	0.00757956
				UNIT	2015	2020	2025	2030	2035	2040	2045	2050
LDV	BEV	Capex BEV total		€/unit	50070	30126.4	25805.2	22850.5	22278.8	21756.4	21279.1	20842.6
		Capex battery		€/unit	16349.3	10818.3	7152.17	4732.58	4277.88	3866.87	3495.34	3159.51
		Opex fix		€/a	898.431	898.431	898.431	898.431	898.431	898.431	898.431	898.431
		Opex var		€/p-km	0	0	0	0	0	0	0	0
		Lifetime BEV		a	15	15	15	15	15	15	15	15
		Lifeftime battery		a	10	10	10	10	10	10	10	10
		Efficiency BEV		kWh,el/km	0.182438	0.165062	0.147688	0.130312	0.121625	0.112938	0.10425	0.0955625
		crf BEV		% / year	0.109795	0.109795	0.109795	0.109795	0.109795	0.109795	0.109795	0.109795
		crf battery BEV		% / year	0.142378	0.142378	0.142378	0.142378	0.142378	0.142378	0.142378	0.142378
		annual cost		€/a	7175.84	4762.69	4130.34	3696.66	3601.43	3514.83	3436.09	3364.48
		LCOM		€/km	0.491397	0.340092	0.309227	0.284501	0.282959	0.281912	0.281251	0.281056
	FCEV	Capex FCEV total		€/unit	46396	35143.8	28199	23896	23198.8	22571.6	22006.4	21496
		Opex fix		€/a	1052.78	1052.78	1052.78	1052.78	1052.78	1052.78	1052.78	1052.78
		Opex var		€/p-km	0	0	0	0	0	0	0	0
		Lifetime FCEV		a	15	15	15	15	15	15	15	15
		Efficiency FCEV		kWh,H2/km	0.278	0.269313	0.225875	0.217188	0.199812	0.199812	0.165062	0.156375
		crf FCEV		% / year	0.109795	0.109795	0.109795	0.109795	0.109795	0.109795	0.109795	0.109795
		annual cost		€/a	6883.1	5552.16	4620.57	4083.62	3947.3	3853.79	3716.63	3631.32
		LCOM		€/km	0.471351	0.396467	0.34593	0.314282	0.310134	0.309099	0.304214	0.303347
	ICE	Capex ICE total		€/unit	20260	20260	20260	20260	20260	20260	20260	20260
		Opex fix		€/a	1207.13	1207.13	1207.13	1207.13	1207.13	1207.13	1207.13	1207.13
		Opex var		€/p-km	0	0	0	0	0	0	0	0
		Lifetime ICE		a	15	15	15	15	15	15	15	15
		Efficiency ICE		kWh,th/km	0.781875	0.747125	0.686313	0.616812	0.564688	0.52125	0.443062	0.364875
		CRF ICE		% / year	0.109795	0.109795	0.109795	0.109795	0.109795	0.109795	0.109795	0.109795
		annual cost		€/a	4360.64	4400.07	4399.35	4353.77	4326.89	4306.74	4244.71	4187.9
		LCOM		€/km	0.298614	0.314199	0.329367	0.335073	0.339958	0.345429	0.347438	0.349842
	PHEV	Capex PHEV total		€/unit	25465.6	23873.6	22592.6	21678.8	21509.8	21296.3	21153.3	20973.9
		Capex battery		€/unit	2335.61	1545.47	919.565	540.867	488.901	386.687	349.534	270.815
		Opex fix		€/a	1318	1318	1318	1318	1318	1318	1318	1318
		Opex var		€/p-km	0	0	0	0	0	0	0	0
		Lifetime PHEV		a	15	15	15	15	15	15	15	15
		Lifeftime battery		a	10	10	10	10	10	10	10	10
		utility factor		%	0.7	0.75	0.78	0.78	0.78	0.78	0.78	0.78
		Efficiency ICE		KWh,th/km	0.234563	0.186781	0.150989	0.135699	0.124231	0.114675	0.0974737	0.0802725
		Efficiency BEV		KWh,el/km	0.127706	0.123797	0.115196	0.101644	0.0948675	0.0880913	0.081315	0.0745388
		crf PHEV		% / year	0.109795	0.109795	0.109795	0.109795	0.109795	0.109795	0.109795	0.109795
		crf battery		% / year	0.142378	0.142378	0.142378	0.142378	0.142378	0.142378	0.142378	0.142378
		annual cost		€/a	4641.91	4384.7	4170.58	4024.15	3984.22	3940.65	3899	3854.3
		LCOM		€/km	0.317875	0.313101	0.31224	0.309705	0.313035	0.316065	0.319141	0.321973
BUS	BEV	Capex BEV total		€/unit	289735	254988	230663	213534	210143	207020	204142	201489
		Capex battery		€/unit	81746.5	54091.5	39734.3	29578.7	26736.8	27620.5	24966.7	26329.3
		Opex fix		€/a	30775	30775	30775	30775	30775	30775	30775	30775
		Opex var		€/p-km	0	0	0	0	0	0	0	0
		Lifetime BEV		a	15	15	15	15	15	15	15	15
		Lifeftime battery		a	9	9	9	9	9	9	9	9
		Efficiency BEV		kWh,el/km	1.87167	1.80778	1.74389	1.68	1.62058	1.56325	1.50796	1.45462
		crf BEV		% / year	0.109795	0.109795	0.109795	0.109795	0.109795	0.109795	0.109795	0.109795
		crf battery BEV		% / year	0.153486	0.153486	0.153486	0.153486	0.153486	0.153486	0.153486	0.153486
		annual cost		€/a	77405.9	71854.5	67916.1	65008.9	63949	63120.1	62178.6	61405.2
		LCOM		€/km	1.19557	1.06961	0.986386	0.918079	0.880723	0.847215	0.814992	0.792684
	FCEV	Capex FCEV total		€/unit	742500	612085	511172	433088	413592	395519	378765	363234
		Opex fix		€/a	33879	33879	33879	33879	33879	33879	33879	33879
		Opex var		€/p-km	0	0	0	0	0	0	0	0
		Lifetime FCEV		a	15	15	15	15	15	15	15	15
		Efficiency FCEV		kWh,H2/km	3.12	2.98667	2.85333	2.72	2.59841	2.48225	2.37128	2.26528
		crf FCEV		% / year	0.109795	0.109795	0.109795	0.109795	0.109795	0.109795	0.109795	0.109795
		annual cost		€/a	152039	135172	120719	109220	105063	101265	97683.9	94233.3
		LCOM		€/km	2.3483	2.01214	1.75327	1.54244	1.44696	1.35921	1.28037	1.21646
	ICE	Capex ICE total		€/unit	225000	225000	225000	225000	225000	225000	225000	225000
		Opex fix		€/a	36983	36983	36983	36983	36983	36983	36983	36983
		Opex var		€/p-km	0	0	0	0	0	0	0	0
		Lifetime ICE		a	15	15	15	15	15	15	15	15
		Efficiency ICE		kWh,th/km	4.09	4.02333	3.95667	3.89	3.82553	3.76213	3.69978	3.63846
		CRF ICE		% / year	0.109795	0.109795	0.109795	0.109795	0.109795	0.109795	0.109795	0.109795
		annual cost		€/a	83234.3	86705.6	90447.9	93381.8	96289.1	99432.5	104089	110492
		LCOM		€/km	1.28559	1.29068	1.31363	1.31877	1.32612	1.33461	1.36433	1.42635
	PHEV	Capex PHEV total		€/unit	255089	242750	233279	225952	224403	222946	221573	220280
		Capex battery		€/unit	11678.1	7727.36	5108.7	3380.42	3055.63	2762.05	2496.67	2256.79
		Opex fix		€/a	39212	39212	39212	39212	39212	39212	39212	39212
		Opex var		€/p-km	0	0	0	0	0	0	0	0
		Lifetime PHEV		a	15	15	15	15	15	15	15	15
		Lifeftime battery		a	6	6	6	6	6	6	6	6
		utility factor		%	0.5	0.5	0.5	0.5	0.5	0.5	0.5	0.5
		Efficiency ICE		KWh,th/km	2.045	2.01167	1.9181	1.945	1.91277	1.88106	1.84989	1.81923
		Efficiency BEV		KWh,el/km	0.935833	0.903889	0.871944	0.84	0.810288	0.781627	0.75398	0.727311
		crf PHEV		% / year	0.109795	0.109795	0.109795	0.109795	0.109795	0.109795	0.109795	0.109795
		crf battery		% / year	0.209796	0.209796	0.209796	0.209796	0.209796	0.209796	0.209796	0.209796
		annual cost		€/a	84784.9	84506.7	84318.1	84954.2	85923.6	87043.6	88940.1	91704.7
		LCOM		€/km	1.30954	1.25795	1.2246	1.19975	1.18336	1.16832	1.16576	1.18382
MDV	BEV	Capex BEV total		€/unit	102177	89739	81038.8	74917.7	73706.7	72591.8	71564.6	70617.8
		Capex battery		€/unit	28027.4	18545.7	12260.9	8113	7333.51	6628.91	5992.01	5416.3
		Opex fix		€/a	13098	13098	13098	13098	13098	13098	13098	13098
		Opex var		€/t-km	0	0	0	0	0	0	0	0
		Lifetime BEV		a	15	15	15	15	15	15	15	15
		Lifeftime battery		a	10	10	10	10	10	10	10	10
		Efficiency BEV		kWh,el/km	0.93492	0.835728	0.74706	0.6678	0.617976	0.57187	0.529203	0.48972
		crf BEV		% / year	0.109795	0.109795	0.109795	0.109795	0.109795	0.109795	0.109795	0.109795
		crf battery BEV		% / year	0.142378	0.142378	0.142378	0.142378	0.142378	0.142378	0.142378	0.142378
		annual cost		€/a	27214	25276.4	23938.7	22941.4	22656.6	22383.7	22136.8	21910.5
		LCOM		€/km	1.19019	1.08332	0.97258	0.903591	0.866275	0.840507	0.81564	0.79384
	FCEV	Capex FCEV total		€/unit	111138	92009.3	80203.2	72888	71702.8	70636.6	69675.7	68808
		Opex fix		€/a	14280	14280	14280	14280	14280	14280	14280	14280
		Opex var		€/t-km	0	0	0	0	0	0	0	0
		Lifetime FCEV		a	15	15	15	15	15	15	15	15
		Efficiency FCEV		kWh,H2/km	1.36325	1.28759	1.21154	1.1389	1.06856	1.00512	0.941737	0.877641
		crf FCEV		% / year	0.109795	0.109795	0.109795	0.109795	0.109795	0.109795	0.109795	0.109795
		annual cost		€/a	32135.9	29486.4	27748.1	26454.9	25970.4	25503.6	25069	24660.9
		LCOM		€/km	1.40544	1.26376	1.12735	1.04198	0.992978	0.957658	0.92368	0.89349
	ICE	Capex ICE total		€/unit	78950	78950	78950	78950	78950	78950	78950	78950
		Opex fix		€/a	15461	15461	15461	15461	15461	15461	15461	15461
		Opex var		€/t-km	0	0	0	0	0	0	0	0
		Lifetime ICE		a	15	15	15	15	15	15	15	15
		Efficiency ICE		kWh,th/km	2.27209	2.14598	2.01923	1.89816	1.78093	1.6752	1.56956	1.46273
		CRF ICE		% / year	0.109795	0.109795	0.109795	0.109795	0.109795	0.109795	0.109795	0.109795
		annual cost		€/a	28356.7	28764.1	29376.3	29674.6	29931.6	30137.1	30528.5	31120.1
		LCOM		€/km	1.24016	1.23281	1.1935	1.16879	1.14444	1.13165	1.12484	1.12752
	PHEV	Capex PHEV total		€/unit	89458	85136	81813	79237	78692	78179	77695	77240
		Capex battery		€/unit	3970.54	2627.3	1736.96	1149.34	1038.91	939.096	848.868	767.31
		Opex fix		€/a	16310	16310	16310	16310	16310	16310	16310	16310
		Opex var		€/t-km	0	0	0	0	0	0	0	0
		Lifetime PHEV		a	15	15	15	15	15	15	15	15
		Lifeftime battery		a	5	5	5	5	5	5	5	5
		utility factor		%	0.4	0.4	0.4	0.4	0.4	0.4	0.4	0.4
		Efficiency ICE		KWh,th/km	1.36325	1.28759	1.21154	1.1389	1.06856	1.00512	0.941737	0.877641
		Efficiency BEV		KWh,el/km	0.373968	0.334291	0.298824	0.26712	0.24719	0.228748	0.211681	0.195888
		crf PHEV		% / year	0.109795	0.109795	0.109795	0.109795	0.109795	0.109795	0.109795	0.109795
		crf battery		% / year	0.243891	0.243891	0.243891	0.243891	0.243891	0.243891	0.243891	0.243891
		annual cost		€/a	29994.6	29479.2	29291.2	29032.5	29061.5	29064.1	29188.3	29441
		LCOM		€/km	1.3118	1.26345	1.19004	1.1435	1.11117	1.09135	1.07546	1.06668
LDV	Total	All technologies vehicle capex		€/unit	381723	345834	322005	305993	303052	300357	297885	295616
		Capex battery BEV and PHEV		€/unit	31997.9	21173	13997.8	9262.34	8372.42	7568.01	6840.88	6183.61
HDV	BEV	Capex BEV total		€/unit	337364	265925	217695	185132	178896	173219	168051	163343
		Capex battery		€/unit	194305	128571	85000.8	56244.9	50841	45956.2	41540.8	37549.6
		Opex fix		€/a	27260	27260	27260	27260	27260	27260	27260	27260
		Opex var		€/t-km	0	0	0	0	0	0	0	0
		Lifetime BEV		a	16	16	16	16	16	16	16	16
		Lifeftime battery		a	10	10	10	10	10	10	10	10
		Efficiency BEV		kWh,el/km	1.86984	1.67146	1.49412	1.3356	1.23595	1.14374	1.05841	0.97944
		crf BEV		% / year	0.105858	0.105858	0.105858	0.105858	0.105858	0.105858	0.105858	0.105858
		crf battery BEV		% / year	0.142378	0.142378	0.142378	0.142378	0.142378	0.142378	0.142378	0.142378
		annual cost		€/a	79534.6	68002.1	60048.9	54518.1	52951.1	51547.9	50295.4	49175.4
		LCOM		€/km	1.45825	1.27058	1.13426	1.03682	1.01462	0.996149	0.980181	0.966764
	FCEV	Capex FCEV total		€/unit	189358	161228	143866	133108	131365	129797	128384	127108
		Opex fix		€/a	30364	30364	30364	30364	30364	30364	30364	30364
		Opex var		€/t-km	0	0	0	0	0	0	0	0
		Lifetime FCEV		a	16	16	16	16	16	16	16	16
		Efficiency FCEV		kWh,H2/km	2.10543	1.95164	1.80543	1.67025	1.5426	1.42658	1.31525	1.20769
		crf FCEV		% / year	0.105858	0.105858	0.105858	0.105858	0.105858	0.105858	0.105858	0.105858
		annual cost		€/a	71236.3	65178	60536.9	57126.7	55267.7	53668.4	52242.9	50986.4
		LCOM		€/km	1.3061	1.21781	1.14348	1.08643	1.05901	1.03713	1.01814	1.00237
	ICE	Capex ICE total		€/unit	152000	152000	152000	152000	152000	152000	152000	152000
		Opex fix		€/a	33468	33468	33468	33468	33468	33468	33468	33468
		Opex var		€/t-km	0	0	0	0	0	0	0	0
		Lifetime ICE		a	16	16	16	16	16	16	16	16
		Efficiency ICE		kWh,th/km	3.50905	3.25273	3.00905	2.78375	2.57101	2.37763	2.19208	2.01281
		CRF ICE		% / year	0.105858	0.105858	0.105858	0.105858	0.105858	0.105858	0.105858	0.105858
		annual cost		€/a	65132	65673	66376.3	66401.2	66272.9	66127.1	66455.3	67287
		LCOM		€/km	1.19418	1.22706	1.25378	1.26281	1.26988	1.27789	1.29511	1.32283
	PHEV	Capex PHEV total		€/unit	172922	164376	157833	152784	151718	150715	149772	148883
		Capex battery		€/unit	8408.21	5563.7	3678.26	2433.9	2200.05	1988.67	1797.6	1624.89
		Opex fix		€/a	35697	35697	35697	35697	35697	35697	35697	35697
		Opex var		€/t-km	0	0	0	0	0	0	0	0
		Lifetime PHEV		a	16	16	16	16	16	16	16	16
		Lifeftime battery		a	5	5	5	5	5	5	5	5
		utility factor		%	0.3	0.3	0.3	0.3	0.3	0.3	0.3	0.3
		Efficiency ICE		KWh,th/km	2.45633	2.27691	2.10634	1.94863	1.7997	1.66434	1.53446	1.40897
		Efficiency BEV		KWh,el/km	0.560952	0.501437	0.448236	0.40068	0.370786	0.343122	0.317522	0.293832
		crf PHEV		% / year	0.105858	0.105858	0.105858	0.105858	0.105858	0.105858	0.105858	0.105858
		crf battery		% / year	0.243891	0.243891	0.243891	0.243891	0.243891	0.243891	0.243891	0.243891
		annual cost		€/a	68904.1	67514.7	66677.1	65678.2	65230.5	64805.9	64746.1	65067.7
		LCOM		€/km	1.26334	1.26147	1.25946	1.24906	1.24991	1.25236	1.2618	1.2792

## Sheet: Road Capex OPEX
LDV Capex
Capex	Investment Cost
Vliet2010_Energy use, cost and CO2 emissions of electric cars_Vehicle cost_battery reduction cost_power sources							p. 2303	Table 6
		Or Electrical drive train or powrtrain
Vehicle configuration	Platform	Electrical drive	tolerance	ICE/generator	tolerance	Battery	tolerance	Total	tolerance			platform share
Regular diesel	15730	0		5640		0		21360		21370	LDV, ICE	0.736423
Regular petrol	15730	0		3730		0		19160		19460		0.820981
Parallel hybrid	15730	3660		2980		2830		24910		25200		0.776407	ave
SHEVCM 2010	15730	4380	750	3020	210	1740		24860	780	24870	LDV, HEV
SHEVWM future	15730	2330	720	2730	190	580		21370	750	21370
PHEV CM 2010	15730	4380	750	3020	210	7550	1370	30670	1580	30680	LDV, PHEV
PHEVWM future	15730	2330	720	2730	190	3030	540	23820	920	23820
BPEVCM 2010	15730	4380	750	0		35800	6870	55900	6910	55910
BPEVCM 2015	15730	4380	750	0		29970	5730	50070	5780	50080	LDV, BEV	0.278449	powertrain as ratio of platfrom
BPEVWM 2015	15730	2330	720	0		25960	5390	44020	5440	44020
BPEVWM future	15730	2330	720	0		13220	2690	31280	2790	31280
The parallel hybrid car has a 2.9kWh battery	0.736423	0		0.264045		0	LDV, ICE	Price Share of its components
	0.632743	0.176187		0.12148		0.069992	LDV, HEV	Price Share of its components
	0.512879	0.142811		0.0984676		0.246169	LDV, PHEV	Price Share of its components
	0.31416	0.0874775		0		0.598562	LDV, BEV	Price Share of its components
	Platform	Electrical drive		ICE/generator		Battery						30680	4.33908	The price of battery for PHEV is 4,3 times more than battery price for HEV, the rest is exactly the same
LDV, ICE
		2015	2020	2025	2030	2035	2040	2045	2050
Diesel		21360	21360	21360	21360	21360	21360	21360	21360
Petrol		19160	19160	19160	19160	19160	19160	19160	19160
ICE, Capex		20260	20260	20260	20260	20260	20260	20260	20260
LDV, PHEV
															2015	2017	2020	2025	2030	2035	2040	2045	2050
	2010	2015	2020	2025	2030	2035	2040	2045	2050				own projection	€/kWh	233.561	198	154.547	102.174	67.6083	61.1126	55.2409	49.9334	45.1359
	30670	25465.6	23873.6	22592.6	21678.8	21509.8	21296.3	21153.3	20973.9			70	all electric range	km	50	55	60	60	60	60	60	60	60	PHEV 50 - PHEV 60
													efficiency	kWh,el/km	0.182438		0.165062	0.147688	0.130312	0.121625	0.112938	0.10425	0.0955625
											Battery capacity considered Variable	10 to 6	battery capacity for PHEV	kWh	10	0	10	9	8	8	7	7	6
													battery capex	€/unit	2335.61	0	1545.47	919.565	540.867	488.901	386.687	349.534	270.815
													powertrain	€/unit	4380	4039.68	3578.12	2923.05	2387.91	2270.88	2159.58	2053.74	1953.09
LDV, BEV												Battery cost with 70 kWh capacity on average for all cars (range 30-100 kWh)								CAGR cost decline
													Li-ion battery pack		2015	2017	2020	2025	2030	2017-2025	2017-2030	2030-2050	exchange rate of 2017			rem.: Nguyen2013 roughly confirms the 2030 numbers (in source 81 USD/kWh)
		2015	2020	2025	2030	2035	2040	2045	2050				BNEF2017, p.8	USD/kWh	350	250	185	105	80	-0.102765	-0.0839174		1.15	USD/€
		50070	30126.4	25805.2	22850.5	22278.8	21756.4	21279.1	20842.6				UBS2017, p.30/31	USD/kWh		205		130		-0.055344
													ave	USD/kWh		227.5		117.5		-0.0792705		-0.02	own assumption conservative
													ave	€/kWh		198		102.174
															2015	2017	2020	2025	2030	2035	2040	2045	2050
													own projection	€/kWh	233.561	198	154.547	102.174	67.6083	61.1126	55.2409	49.9334	45.1359
											Battery capacity considered Fixed	70	70 kWh battery pack	€/unit	16349.3	13860	10818.3	7152.17	4732.58	4277.88	3866.87	3495.34	3159.51
													powertrain	€/unit	4380	4039.68	3578.12	2923.05	2387.91	2270.88	2159.58	2053.74	1953.09			rem.: assumption that cost reduction is half of battery pack (see UBS2017, p.26 with decline of 3450 to 2416 from 2017 to 2025 -> CAGR: -4.3%/a
																										rem.: our cost assumption is more conservative as shown in UBS2017, p.26
LDV, FCEV		Bubeck2016_Perspective ofelectric mobility total cost of ownership of electric vehicle in Germany_LDV FCEV Capex_table 6_Transport policy
		2015	2020	2025	2030	2035	2040	2045	2050		FC	0.906372		Annual reduction		2015-2030
Power train PEM Fuel cell(PEMFC)	[€/kW]	284	173.72	106.263	65	60.2553	55.857	51.7797	48		FC	0.984955		Annual reduction		2030-2050
Electric motor	[€/kW]	20	17.7581	15.7675	14	11.7725	9.89949	8.32445	7		EM	0.976502		Annual reduction		2015-2030
											EM	0.965936		Annual reduction		2030-2050
Energy Storage Fuel tank	[€/kWh]	1.9	1.9	1.9	1.9	1.9	1.9	1.9	1.9
Fathabadi2017_FCHEV Novel Fuell cell SC HPGS_kW proton exchange membrance_Energy conversion Management
Fuel cell power	100	kW
Hydrogen storage	140	kWh	503.597	rem.: range of 500 km is needed
		2015	2020	2025	2030	2035	2040	2045	2050
total (cost) expenditure for powertrain + storage	[€/unit]	30666	19413.8	12469	8166	7468.79	6841.65	6276.41	5766
		2015	2020	2025	2030	2035	2040	2045	2050
FCEV Cost		46396	35143.8	28199	23896	23198.8	22571.6	22006.4	21496
		0.339038	0.660962
		Platform	Rest	LDV, FCEV	Price Share of its components
BUS Capex
Lajunen2016_LCCA and CO2 emissions diesel, natural gas HEV FCH Electric transit buses
Table 5.							€
Lifecycle cost calculation parameters.							2015	2020	2025	2030	2035	2040	2045	2050
Cost parameter	Abbreviation	USA	Erope
Bus without driveline
Diesel bus purchase cost: US ($)/EU (€)	CDI	300000	225000		BUS, ICE		225000	225000	225000	225000	225000	225000	225000	225000
Natural gas bus purchase cost: US ($)/EU (€)	CCNG	330000	247500
Parallel hybrid bus purchase cost: US ($)/EU (€)	CPAR	420000	315000		BUS Platform cost by LDV, ICE share		166000	166000	166000	166000	166000	166000	166000	166000	0.736423	Vliet2010_Energy use, cost and CO2 emissions of electric cars_Vehicle cost_battery reduction cost_power sources
Series hybrid bus purchase cost: US ($)/EU (€)	CSER	420000	315000
Fuel cell hybrid bus purchase cost: US ($)/EU (€) a	CFCH	990000	742500
Electric bus purchase cost (opportunity): US ($)/EU (€)	CEV1	600000	450000		BUS, FCEV		742500
Electric bus purchase cost (overnight): US ($)/EU (€)	CEV2	750000	562500	112500	BUS, BEV 1		450000
Diesel fuel cost without VAT: US ($/gal)/EU (€/l)	Cdi	29281	42644	271	BUS, BEV 2		562500
Natural gas cost without VAT: US ($/m3)/EU (€/m3) b	Ccng	0.6	42401	415.129	correction battery cost		49204.9
Hydrogen cost without VAT: US ($/kg)/EU (€/kg)a	Chy	6	6		BUS, BEV 2 corrected		513295
Electricity cost without VAT: US ($/kWh)/EU (€/kWh)	Celec	0.12	0.1		Bus, BEV, capex
Maintenance cost for diesel bus: US ($/mile)/EU (€/km)	Cmc	0.3	0.16		platform	[€/unit]	166000	166000	166000	166000	166000	166000	166000	166000
High power battery cost: US ($/kWh)/EU (€/kWh)	Cbatt_hp	900	750		powertrain	[€/unit]	45819.1	37430.7	30578	24979.9	23755.6	22591.3	21484.1	20431.2	333.6	kWh	battery (Lajunen 2016, Tab. 4)
High energy battery cost: ($/kWh)/(€/kWh)	Cbatt_he	600	500		battery	[€/unit]	77916.1	51557	34085.2	22554.1	20387.2	18428.4	16657.8	15057.3	0.05	2015-2030	Tab.6, Vliet2010_Energy use, cost and CO2 emissions of electric cars_Vehicle cost_battery reduction cost_power sources
Fuel cell stack replacement cost: ($/kW)/(€/kW) a	Cfc	600	500		BEV bus, total	[€/unit]	289735	254988	230663	213534	210143	207020	204142	201489	0.015045	2030-2050	Vliet2010_Energy use, cost and CO2 emissions of electric cars_Vehicle cost_battery reduction cost_power sources
Total operation distance (miles/km)	Dtot	500000	800000													rem.: scaling accroding to LDV
Service life in years	Ts	12	12		Bus, PHEV, capex
Discount rate (%)	d_rate	4	4		platform	[€/unit]	166000	166000	166000	166000	166000	166000	166000	166000		rem.: platform cost of ICE bus is assumed to be relatively the same as for ICE LDV
					ICE generator	[€/unit]	31592.2	31592.2	31592.2	31592.2	31592.2	31592.2	31592.2	31592.2		rem.: ICE generator for PHEV bus is assumed to scale in the same way as for ICE LDV
					powertrain	[€/unit]	45819.1	37430.7	30578	24979.9	23755.6	22591.3	21484.1	20431.2		rem.: powertran for PHEV bus is assumed to be based on the cost of the ICE generator, scaled by the ratio of PHEV LDV and following the same learning curve
					battery	[€/unit]	11678.1	7727.36	5108.7	3380.42	3055.63	2762.05	2496.67	2256.79		rem.: battery size is in kWh (Lajunen2012)			50
					PHEV bus, total	[€/unit]	255089	242750	233279	225952	224403	222946	221573	220280
					utility factor	[-]	0.5	0.5	0.5	0.5	0.5	0.5	0.5	0.5		rem.: Lajunen2012 - about 50%, assumption of breaks per driving cycle and fast charging; this assumption is very weak!!!
					battery lifetime	[a]	5	5	5	5	5	5	5	5		rem.: Lajunen2012 - Fig. 11, about 5 years for case of Braunschweig
	Battery price PHEV bus * Battery price LDV BEV / Battery price PHEV LDV
	Battery price bus BEV	81746.5			FCEV ex platform		576500	446085	345172	267088	247592	229519	212765	197234
					FCEV bus, total		742500	612085	511172	433088	413592	395519	378765	363234
					BUS BEV2 ex platform		347295	241188	168795	119287	109721	100959	92967	85662
					LDV battery+powertrain		20729.3	14396	10075	7120	6549	6026	5549	5113
					BEV bus, total		289735	254988	230663	213534	210143	207020	204142	201489
HDV Capex
https://www.extremetech.com/extreme/259195-tesla-semi-500-mile-range-cheaper-diesel-quick-charge					→	750 kWh	battery capacity
https://www.trucks.com/2017/11/20/tesla-semi-faq-facts/		→	300 miles	$150,000		500 miles	$180,000
https://reductionrevolution.com.au/blogs/news-reviews/tesla-semi-truck-cost-battery-size-availability-in-australia						→	500 miles	$180,000	800-1000 kWh
https://arstechnica.com/cars/2017/11/teslas-expected-truck-prices-are-much-lower-than-experts-predicted/					→	Expert idea	$300,000	Tesla idea		$180,000
https://arstechnica.com/cars/2017/11/teslas-expected-truck-prices-are-much-lower-than-experts-predicted/													exchange rate USD/€ - long-term
1,000 kWh of batteries would be $190,000													1.33	USD/€
Total cost 300,000	$	€
Battery cost	190000	142857
Platform	110000	82706.8
1- HDV, BEV Total	300000	225564
															range (kWh , km)	2015	2020	2025	2030	2035	2040	2045	2050
	platform share	0.366667													150	80.2208	89.7421	100.393	112.309	121.364	131.149	141.723	153.149
															270	144.397	161.536	180.708	202.156	218.455	236.068	255.101	275.668
Tesla data 190 $/kWh	$/kWh	190	€/kWh	142.857											400	213.922	239.312	267.716	299.491	323.637	349.73	377.927	408.397
1000 kWh battery	$/unit	1000	€/unit	751.88											1000	534.805	598.281	669.29	748.727	809.093	874.325	944.817	1020.99
HDV platform cost		[€/unit]	111900	111900	111900	111900	111900	111900	111900	111900		rem.:	0.278449	powertrain as ratio of platform cost; scaling accoridng to LDV
HDV powertrain		[€/unit]	31158.4	25454	20794	16987.1	16154.5	15362.8	14609.9	13893.8		rem.:	900	kWh,cap	Tesla Truck	https://reductionrevolution.com.au/blogs/news-reviews/tesla-semi-truck-cost-battery-size-availability-in-australia
HDV battery		[€/unit]	194305	128571	85000.8	56244.9	50841	45956.2	41540.8	37549.6			142.857	€/kWh	for 2020(!)	scaling according to LDV
BEV HDV, total		[€/unit]	337364	265925	217695	185132	178896	173219	168051	163343
															124200	The average of these numbers
HDV, ICE		[€/unit]	152000	152000	152000	152000	152000	152000	152000	152000					144200	Is used to HDV, ICE
platform cost		[€/unit]	111900	111900	111900	111900	111900	111900	111900	111900		0.736423	Vliet2010_Energy use, cost and CO2 emissions of electric cars_Vehicle cost_battery reduction cost_power sources		166300
															144200
															166300
															166300
															151917
HDV, PHEV, capex
platform		[€/unit]	111900	111900	111900	111900	111900	111900	111900	111900		rem.: platform cost of PHEV HDV is assumed to be relatively the same as for ICE HDV
ICE generator		[€/unit]	21472	21472	21472	21472	21472	21472	21472	21472		rem.: ICE generator for PHEV HDV is assumed to scale in the same way as for ICE HDV, but scaled in the same way as for LDV
powertrain		[€/unit]	31141.5	25440.2	20782.7	16977.8	16145.8	15354.5	14601.9	13886.3		rem.: powertran for PHEV HDV is assumed to be based on the cost of the ICE generator, scaled by the ratio of PHEV LDV and following the same learning curve
battery		[€/unit]	8408.21	5563.7	3678.26	2433.9	2200.05	1988.67	1797.6	1624.89		rem.: battery size is in kWh			36	assumption: in the same ration as for LDV
HDV PHEV, total		[€/unit]	172922	164376	157833	152784	151718	150715	149772	148883		rem.: confirmed by		Gao2015_the evaluation of developing vehicle technology on the fuel economy of long-haul trucks_Energy conversion management (Tab. 3)
utility factor		[-]	0.3	0.3	0.3	0.3	0.3	0.3	0.3	0.3		rem.: based on the 0.5 UF of bus with regular charging options after finishing a bus lane cycle, HDVs may be only charged after quite long driving distances, or 8 hrs shift, hence a lower UF, estimated to 0.3
battery lifetime		[a]
platform		[€/unit]	111900	111900	111900	111900	111900	111900	111900	111900
FC		[€/unit]	71000	43430	26565.7	16250	15063.8	13964.2	12944.9	12000		rem.:	250	kW	Kast2017; table 1; class 8; cost due to HDV
hydrogen storage		[€/unit]	1458.03	1458.03	1458.03	1458.03	1458.03	1458.03	1458.03	1458.03		rem.:	based on cost of LDV and demand for LDV, but scaled for efficiency difference of MDV to LDV
Electric motor		[€/unit]	5000	4439.52	3941.87	3500	2943.14	2474.87	2081.11	1750
FCEV HDV, total		[€/unit]	189358	161228	143866	133108	131365	129797	128384	127108
The battery specification in Tab2 front of here
	Hybrid capacity
HDV, PHEV 1
	Siavash Methodology
N24 = 4,3 battery difference between HEV and PHEV from LDV
Assume	ALL hybrid capacity
	If with 5 kWh battery capacity	5	0	0	0	0	0	0	0	0
HDV, PHEV 2			182089	169750	160279	152952	151403	149946	148573	147280
			107.5
	If with 25 kWh battery capacity	25	0	0	0	0	0	0	0	0
HDV, PHEV 3			182089	169750	160279	152952	151403	149946	148573	147280
	If with 150 kWh battery capacity	150	0	0	0	0	0	0	0	0
HDV, PHEV 4			182089	169750	160279	152952	151403	149946	148573	147280
	If with 35 kWh battery capacity	35	0	0	0	0	0	0	0	0
Hybrid capacity			241089	228750	219279	211952	210403	208946	207573	206280
Source Only for 35 kWh	Gao2015_the evaluation of developing vehicle technology on the fuel economy of long-haul trucks_Energy conversion management
	Christian Methodology
	Bus, PHEV, capex											0.736423	Vliet2010_Energy use, cost and CO2 emissions of electric cars_Vehicle cost_battery reduction cost_power sources
Method by Prof in 21,02,18 for PHEV BUS	platform	[€/unit]	111936	111936	111936	111936	111936	111936	111936	111936
	ICE generator	[€/unit]	21452.5	21452.5	21452.5	21452.5	21452.5	21452.5	21452.5	21452.5
Battery assumed to be :	powertrain	[€/unit]	31113.3	25417.1	20763.8	16962.5	16131.1	15340.5	14588.7	13873.7
100	battery	[€/unit]	23356.1	15454.7	10217.4	6760.83	6111.26	5524.09	4993.34	4513.59
	PHEV bus, total	[€/unit]	187858	174261	164370	157112	155631	154254	152971	151776
																		Yeon Lee2016_Parametric modeling approach for Env and LCA of MDT electrification_Cleaner Production
MDV Capex
													exchange rate USD/€ - long-term
													1.33	USD/€
	Davis2012_A methodology to evaluate the competitiveness of electric delivery trucks_transportation research							tab 1 and tab 7
	Zhou2017_Life cycle emission & life time cost of MDV diesel and battery in Toronto, Canada_Transportation research .pdf									80 kWh battery capacity
	Lee2016_Parametric modeling approach for Env and LCA of MDT electrification_Cleaner Production, p. 3303; for 120 kWh,cap battery
			€
			2015	2020	2025	2030	2035	2040	2045	2050
	MDV, ICE		78950	78950	78950	78950	78950	78950	78950	78950		rem.:	105000	USD (Lee2016; class 6 truck; p. 3303
	MDV Platform cost by LDV, ICE share		58000	58000	58000	58000	58000	58000	58000	58000	0.736423	Vliet2010_Energy use, cost and CO2 emissions of electric cars_Vehicle cost_battery reduction cost_power sources
	MDV, PHEV, capex
	platform	[€/unit]	58000	58000	58000	58000	58000	58000	58000	58000		rem.: platform cost of PHEV MDV is assumed to be relatively the same as for ICE MDV
	ICE generator	[€/unit]	11217.9	11217.9	11217.9	11217.9	11217.9	11217.9	11217.9	11217.9		rem.: ICE generator for PHEV MDV is assumed to scale in the same way as for ICE MDV, but scaled in the same way as for LDV
	powertrain	[€/unit]	16269.7	13291.1	10857.8	8869.97	8435.25	8021.84	7628.69	7254.81		rem.: powertran for PHEV MDV is assumed to be based on the cost of the ICE generator, scaled by the ratio of PHEV LDV and following the same learning curve
	battery	[€/unit]	3970.54	2627.3	1736.96	1149.34	1038.91	939.096	848.868	767.31		rem.: battery size is in kWh			17	assumption: in the same ration as for LDV
	MDV PHEV, total	[€/unit]	89458	85136	81813	79237	78692	78179	77695	77240
	utility factor	[-]	0.4	0.4	0.4	0.4	0.4	0.4	0.4	0.4		rem.: based on the 0.5 UF of bus with regular charging options after finishing a bus lane cycle, MDVs may be only charged after an 8 hrs shift, hence a lower UF, estimated to 0.4
	battery lifetime	[a]	5	5	5	5	5	5	5	5		rem.: Lajunen2012 - Fig. 11, about 5 years for case of Braunschweig
	platform		58000	58000	58000	58000	58000	58000	58000	58000
	FC		48280	29532.4	18064.7	11050	10243.4	9495.68	8802.54	8160		rem.:	170	kW	Kast2017; table 1; class 6; cost due to LDV
	hydrogen storage		1458.03	1458.03	1458.03	1458.03	1458.03	1458.03	1458.03	1458.03		rem.:	based on cost of LDV and demand for LDV, but scaled for efficiency difference of MDV to LDV
	Electric motor		3400	3018.87	2680.47	2380	2001.33	1682.91	1415.16	1190
	FCEV MDV, total		111138	92009.3	80203.2	72888	71702.8	70636.6	69675.7	68808
	MDV platform cost		58000	58000	58000	58000	58000	58000	58000	58000
	MDV powertrain		16150	13193.3	10777.9	8804.74	8373.22	7962.85	7572.59	7201.46		rem.:	0.278449	powertrain as ratio of platform cost; scaling accoridng to LDV					Vliet2010_Energy use, cost and CO2 emissions of electric cars_Vehicle cost_battery reduction cost_power sources
	MDV battery		28027.4	18545.7	12260.9	8113	7333.51	6628.91	5992.01	5416.3		rem.:	120	kWh,cap	Lee2016
	BEV MDV, total		102177	89739	81038.8	74917.7	73706.7	72591.8	71564.6	70617.8					lee2012
All Opex (LDV) (BUS) (MDV) (HDV) → Maintenance + Insurance
LDV (All Done)
opex considerations		ICE	BEV	PHEV	FCEV
insurance, average rate US	USD/car/a	900	900	900	900		https://www.dmv.org/insurance/average-car-insurance-rates.php							exchange rate USD/€ - long-term
insurance, average rate US	€/car/a	676.692	676.692	676.692	676.692									1.33	USD/€
vehicle tax is excluded, as also for other eneryg system components	€/car/a	0	0	0	0									exchange rate of 2017
maintenance	USD/car/a	610	255	737.5	432.5		rem.: for BEV and ICE see UBS2017, p.7							1.15	USD/€
maintenance	€/car/a	530.435	221.739	641.304	376.087		UBS2017_Hummel_UBS evidence lab electric car teardown - disruption ahead_fullReport_en_170518_comm_cb
total - opex,fix (no opex,var)	€/car/a	1207.13	898.431	1318	1052.78
BUS (All Done)
opex considerations		ICE	BEV	PHEV	FCEV
insurance, average rate US	USD/bus/a	35000	35000	35000	35000		https://www.trustedchoice.com/commercial-vehicle-insurance/compare-coverage/rate-cost/							exchange rate USD/€ - long-term
insurance, average rate US	€/bus/a	26315.8	26315.8	26315.8	26315.8									1.33	USD/€
vehicle tax is excluded, as also for other eneryg system components	€/bus/a	0	0	0	0									exchange rate of 2017
maintenance - diesel	€/km	0.16					rem.: Lajunen2016, Tab. 5							1.15	USD/€
distance per year	km/a	66667					rem.: Lajunen2016, Fig. 5
maintenance	€/bus/a	10666.7	4459.04	12896.2	7562.88		rem.: scaling according to LDV			650000
										1040000
total - opex,fix (no opex,var)	€/bus/a	36983	30775	39212	33879
MDV							Maintenance cost
									https://www.diamondsales.com/medium-duty-diesel-truck-maintenance/						exchange rate USD/€ - long-term
opex considerations		ICE	BEV	PHEV	FCEV		300 to 600	USD/month							1.33	USD/€
															exchange rate of 2017
insurance, average rate	£/MDV/a	10001	10001	10001	10001										1.15	USD/€
insurance, average rate UK	€/MDV/a	11401.1	11401.1	11401.1	11401.1
maintenance - diesel
distance per year
maintenance per month	USD/MDV/m	450
maintenance per year	€/MDV/a	4060.15	1697.28	4908.79	2878.71
total - opex,fix (no opex,var)	€/MDV/a	15461	13098	16310	14280
HDV
opex considerations		ICE	BEV	PHEV	FCEV
insurance, average rate US	£/HDV/a	20001	20001	20001	20001
insurance, average rate US	€/HDV/a	22801.1	22801.1	22801.1	22801.1
maintenance - diesel
distance per year
maintenance	€/HDV/a	10666.7	4459.04	12896.2	7562.88	Same as the bus
total - opex,fix (no opex,var)	€/HDV/a	33468	27260	35697	30364

## Sheet: Final Energy Demand
World - GA		UNIT	YEAR												CAGR	absolute
	Demand Numbers		2000	2005	2010	2015	2020	2025	2030	2035	2040	2045	2050
Road	Road Freight	[m t-km]	7.34447e+06	8.83936e+06	1.08423e+07	1.27067e+07	1.48317e+07	1.6783e+07	1.90665e+07	2.16654e+07	2.48562e+07	2.83846e+07	3.21564e+07		0.026883	1.53066
	Road Passenger	[m p-km]	2.85783e+07	3.35479e+07	3.86188e+07	4.61039e+07	5.47125e+07	6.22743e+07	7.10998e+07	8.05455e+07	9.18985e+07	1.05297e+08	1.20739e+08		0.0278884	1.61884
Rail	Rail Freight	[m t-km]	7.34019e+06	9.2036e+06	1.01478e+07	1.11405e+07	1.23022e+07	1.33329e+07	1.452e+07	1.58979e+07	1.75913e+07	1.95664e+07	2.18571e+07		0.0194419	0.961948
	Rail Passenger	[m p-km]	2.28728e+06	2.6231e+06	3.13276e+06	3.82082e+06	4.57263e+06	5.17056e+06	5.79179e+06	6.28043e+06	6.85416e+06	7.50376e+06	8.19296e+06		0.0220338	1.14429
Aviation	Aviation Freight	[m t-km]	0	0	0	197554	264371	353788	473448	633580	862956	1.15687e+06	1.5144e+06		0.0599198	6.66577
	Aviation Passenger	[m p-km]	3.0367e+06	3.92368e+06	4.60241e+06	5.62926e+06	6.86565e+06	8.4345e+06	1.06647e+07	1.31311e+07	1.70243e+07	2.15196e+07	2.63626e+07		0.0451008	3.68313
Marine	Marine Freight	[m t-km]	0	0	0	8.39614e+07	9.89799e+07	1.1655e+08	1.37402e+08	1.62472e+08	1.92967e+08	2.30438e+08	2.76879e+08		0.0346799	2.29769
	Marine Passenger	[m p-km]	0	0	0	125719	151478	184589	226466	278113	339833	411200	491228		0.0397068	2.90734
	Total	[m t-km]	1.46847e+07	1.8043e+07	2.09901e+07	1.08006e+08	1.26378e+08	1.4702e+08	1.71461e+08	2.00669e+08	2.36278e+08	2.79546e+08	3.32407e+08		0.0326405	2.07766
	Total	[m p-km]	3.39023e+07	4.00947e+07	4.6354e+07	5.56797e+07	6.63023e+07	7.60639e+07	8.77827e+07	1.00235e+08	1.16117e+08	1.34731e+08	1.55785e+08		0.0298324	1.79788
	Freight / Passengers per Vehicle (Load Factor)		2000	2005	2010	2015	2020	2025	2030	2035	2040	2045	2050
Light and medium truck share	Road Freight - LDV+MDV	[t/vehicle]	0.842654	0.848458	0.829843	0.85577	0.879297	0.887366	0.902376	0.908163	0.914931	0.916336	0.91123
	Road Freight - HDV	[t/vehicle]	7.50597	7.74563	7.72312	7.88905	8.07398	8.24657	8.42323	8.58925	8.77002	8.92724	9.05041
	Road Passenger - LDV	[p/vehicle]	1.6193	1.61264	1.59092	1.61276	1.63978	1.65982	1.67454	1.68056	1.69069	1.70438	1.72661
	Road Passenger - BUS	[p/vehicle]	17.5381	17.4027	17.4123	17.5716	17.9825	18.2654	18.5216	18.6777	18.872	19.1288	19.2406
	Road Passenger - 2W/3W	[p/vehicle]	1.14742	1.14233	1.12957	1.13614	1.13948	1.14102	1.14187	1.1406	1.14038	1.14143	1.14609
	Distance Per Vehicle (km)
Light and medium truck share	Road Freight - LDV+MDV	[km/vehicle]	22865.3	23332.2	24613.6	25389.2	26154	26631.2	27140.4	27600.6	28058.5	28416.2	28655.1
	Road Freight - HDV	[km/vehicle]	55724.4	56369.4	56297.6	54541.2	53520.6	52941	52582	52188.3	51747.2	51312.3	50866
	Road Passenger - LDV	[km/vehicle]	15156	15008.3	14833.5	14602.9	14004.1	13357	12993.5	12727.7	12467.8	12217.2	11970.9
	Road Passenger - BUS	[km/vehicle]	61208.9	61565.9	62821.6	64744	67178	68853.5	70809.7	72609.6	74503	76293.5	77464.9
	Road Passenger - 2W/3W	[km/vehicle]	6912.42	6873.09	6924.43	7223.75	7379.97	7452.51	7493.8	7434.61	7427.29	7479.76	7701.88
	Number Of Vehicles total (table) Million
Light and medium truck share	Road Freight - LDV+MDV	[vehicle]	95.3692	105.34	120.416	134.224	149.142	164.636	181.029	201.835	227	256.677	291.183
	Road Freight - HDV	[vehicle]	13.1626	15.4652	19.276	22.749	26.3806	29.525	33.0315	37.0367	41.9149	47.3498	53.2952
	Road Passenger - LDV	[vehicle]	645.281	741.865	825.396	982.41	1196.74	1418.02	1661.19	1933.48	2251.43	2619.01	3045.22
	Road Passenger - BUS	[vehicle]	10.4835	12.4278	14.5531	16.3582	17.9152	19.261	20.7606	22.4379	24.3875	26.5086	28.5236
	Road Passenger - 2W+3W	[vehicle]	188.491	290.992	413.295	532.454	666.6	780.108	905.694	1035.4	1199.99	1413.4	1725.6
	Number of Vehicles total (calculated) Million
Light and medium truck share	Road Freight - LDV+MDV	[vehicle]	95.4403	105.415	120.491	134.308	149.226	164.726	181.139	201.994	227.252	257.093	291.869	MDV - BEV - electricity demand share
	Road Freight - HDV	[vehicle]	13.1628	15.4656	19.2764	22.7494	26.3811	29.5255	33.0321	37.0373	41.9155	47.3506	53.2962	MDV - FCEV - hydrogen demand share
	Road Passenger - LDV	[vehicle]	644.994	741.56	824.929	981.876	1196.02	1417.12	1660.19	1932.52	2250.82	2619.35	3047.61	MDV - ICE - liquid fuels demand share
	Road Passenger - BUS	[vehicle]	10.4836	12.428	14.5532	16.3583	17.9153	19.2611	20.7606	22.438	24.3876	26.5088	28.5238	MDV - PHEV - electricity/ liquid fuels demand share
	Road Passenger - 2W/3W	[vehicle]	188.463	290.955	413.228	532.412	666.548	780.048	905.631	1035.35	1199.97	1413.47	1725.81	HDV - BEV - electricity demand share
	Number Of Vehicles total (Final) Million													HDV - FCEV - hydrogen demand share
Light and medium truck share	Road Freight - LDV+MDV	[vehicle]	95.3692	105.34	120.416	134.224	149.142	164.636	181.029	201.835	227	256.677	291.183	HDV - ICE - liquid fuels demand share
	Road Freight - HDV	[vehicle]	13.1626	15.4652	19.276	22.749	26.3806	29.525	33.0315	37.0367	41.9149	47.3498	53.2952	HDV - PHEV - electricity/ liquid fuels demand share
	Road Passenger - LDV	[vehicle]	645.281	741.865	825.396	982.41	1196.74	1418.02	1661.19	1933.48	2251.43	2619.01	3045.22	Electricity demand share - LDV BEV
	Road Passenger - BUS	[vehicle]	10.4835	12.4278	14.5531	16.3582	17.9152	19.261	20.7606	22.4379	24.3875	26.5086	28.5236	Hydrogen demand share - LDV FCEV
	Road Passenger - 2W/3W	[vehicle]	188.491	290.992	413.295	532.454	666.6	780.108	905.694	1035.4	1199.99	1413.4	1725.6	Liquid fuels demand share - LDV ICE
	Number of Vehicles New Installed													Electricity/ liquid fuels demand share - LDV PHEV
Light and medium truck share	Road Freight - LDV+MDV	[vehicle]		41.7602	50.1896	53.9466	56.6779	65.684	70.3396	77.4841	90.8483	100.017	111.99	BUS - BEV - electricity demand share
	Road Freight - HDV	[vehicle]		6.6902	8.96587	9.8983	10.3218	12.1102	13.4048	14.327	16.9884	18.8398	20.2724	BUS - FCEV - hydrogen demand share
	Road Passenger - LDV	[vehicle]		311.678	330.819	432.146	526.008	552.097	675.323	798.289	870.048	1042.9	1224.5	BUS - ICE - liquid fuels demand share
	Road Passenger - BUS	[vehicle]		5.43887	6.26785	6.65619	6.99588	7.61359	8.15576	8.67319	9.56318	10.2769	10.6882	BUS - PHEV - electricity/ liquid fuels demand share
	Road Passenger - 2W/3W	[vehicle]		165.331	219.301	256.924	299.478	332.808	382.509	429.182	497.398	595.926	741.374	2W/3W - BEV - electricity demand share
			25.047	23.6161	22.7083	22.9743	23.1479	23.2048	23.277	23.3777	23.4749	23.5827	23.6888	2W/3W - ICE - liquid fuels demand share
	Separation Of Demand Categories		2000	2005	2010	2015	2020	2025	2030	2035	2040	2045	2050
Light and medium truck share	Road Freight - LDV+MDV demand share	[%]	0.250379	0.236085	0.226988	0.229654	0.231382	0.231945	0.232673	0.233698	0.234706	0.235846	0.237001
	Road Freight - HDV demand share	[%]	0.749621	0.763915	0.773012	0.770346	0.768618	0.768055	0.767327	0.766302	0.765294	0.764154	0.762999
	Road Passenger - LDV demand share	[%]	0.5539	0.534997	0.504092	0.501566	0.501988	0.504505	0.508056	0.5132	0.516281	0.517984	0.521714
	Road Passenger - BUS demand share	[%]	0.393795	0.39691	0.412216	0.403656	0.395563	0.38898	0.382951	0.377798	0.373122	0.367409	0.352115
	Road Passenger - 2W/3W demand share	[%]	0.0523048	0.068093	0.0836925	0.0947774	0.102448	0.106515	0.108993	0.109002	0.110597	0.114606	0.126171		82.44
	Separation to Fuel Categories														4.17
															54.17
Road	Road Freight - MDV - BEV - electricity demand share	[%] - newly sold		0.002	0.002	0.002	0.1	0.19	0.48	0.75	0.8	0.8	0.8	1
	Road Freight - MDV - FCEV - hydrogen demand share	[%] - newly sold		0	0	0	0.001	0.01	0.02	0.05	0.1	0.1	0.1
	Road Freight - MDV - ICE - liquid fuels demand share	[%] - newly sold		0.996	0.996	0.996	0.889	0.78	0.47	0.16	0.05	0.04	0.03
	Road Freight - MDV - PHEV - electricity/ liquid fuels demand share	[%] - newly sold		0.002	0.002	0.002	0.01	0.02	0.03	0.04	0.05	0.06	0.07
	Road Freight - HDV - BEV - electricity demand share	[%] - newly sold		0	0	0	0.01	0.08	0.15	0.3	0.5	0.5	0.5	1
	Road Freight - HDV - FCEV - hydrogen demand share	[%] - newly sold		0	0	0	0.005	0.02	0.05	0.2	0.3	0.3	0.3
	Road Freight - HDV - ICE - liquid fuels demand share	[%] - newly sold		1	1	1	0.975	0.88	0.77	0.46	0.12	0.04	0.03
	Road Freight - HDV - PHEV - electricity/ liquid fuels demand share	[%] - newly sold		0	0	0	0.01	0.02	0.03	0.04	0.08	0.16	0.17
	Road Passenger - LDV - BEV - electricity demand share	[%] - newly sold		0.002	0.002	0.002	0.03	0.1	0.39	0.68	0.74	0.73	0.76	1
	Road Passenger - LDV - FCEV - hydrogen demand share	[%] - newly sold		0	0	0	0	0.001	0.01	0.02	0.05	0.1	0.1
	Road Passenger - LDV - ICE - liquid fuels demand share	[%] - newly sold		0.996	0.996	0.996	0.94	0.799	0.5	0.2	0.11	0.07	0.04
	Road Passenger - LDV - PHEV - electricity/ liquid fuels demand share	[%] - newly sold		0.002	0.002	0.002	0.03	0.1	0.1	0.1	0.1	0.1	0.1
	Road Passenger - BUS - BEV - electricity demand share	[%] - newly sold		0.1	0.1	0.1	0.2	0.5	0.8	0.9	0.9	0.9	0.9	1
	Road Passenger - BUS - FCEV - hydrogen demand share	[%] - newly sold		0.001	0.001	0.001	0.001	0.001	0.001	0.001	0.001	0.001	0.001
	Road Passenger - BUS - ICE - liquid fuels demand share	[%] - newly sold		0.894	0.894	0.894	0.789	0.479	0.169	0.059	0.049	0.039	0.029
	Road Passenger - BUS - PHEV - electricity/ liquid fuels demand share	[%] - newly sold		0.005	0.005	0.005	0.01	0.02	0.03	0.04	0.05	0.06	0.07	1
	Road Passenger - 2W/3W - BEV - electricity demand share	[%] - newly sold		0.2	0.25	0.3	0.35	0.4	0.6	0.75	0.85	0.9	0.95
	Road Passenger - 2W/3W - ICE - liquid fuels demand share	[%] - newly sold		0.8	0.75	0.7	0.65	0.6	0.4	0.25	0.15	0.1	0.05
Road	Road Freight - MDV - BEV - electricity demand share	[%] - stock				0.002	0.0365395	0.103544	0.269384	0.488769	0.68946	0.785563	0.8		6.09688e+06
	Road Freight - MDV - FCEV - hydrogen demand share	[%] - stock				0	0.000352444	0.00404699	0.0110031	0.0278109	0.0601907	0.0855629	0.1
	Road Freight - MDV - ICE - liquid fuels demand share	[%] - stock				0.996	0.958289	0.881132	0.698904	0.452867	0.20949	0.0780346	0.0393019
	Road Freight - MDV - PHEV - electricity/ liquid fuels demand share	[%] - stock				0.002	0.00481955	0.0112777	0.020709	0.0305527	0.0408593	0.0508397	0.0606981		185035
	Road Freight - HDV - BEV - electricity demand share	[%] - stock				0	0.00353657	0.0331588	0.086022	0.182662	0.331014	0.442869	0.5		1.22677e+07
	Road Freight - HDV - FCEV - hydrogen demand share	[%] - stock				0	0.00176829	0.00908786	0.0269012	0.0948204	0.193026	0.271435	0.3
	Road Freight - HDV - ICE - liquid fuels demand share	[%] - stock				1	0.991159	0.947069	0.866217	0.691961	0.423762	0.187072	0.0606121
	Road Freight - HDV - PHEV - electricity/ liquid fuels demand share	[%] - stock				0	0.00353657	0.0106842	0.0208603	0.0305564	0.0521978	0.0986243	0.139388		1.02598e+06
	Road Passenger - LDV - BEV - electricity demand share	[%] - stock				0.002	0.0134263	0.0475777	0.190693	0.425245	0.618711	0.718487	0.744482		4.68956e+07
	Road Passenger - LDV - FCEV - hydrogen demand share	[%] - stock				0	0	0.000365566	0.00416631	0.0114879	0.0282556	0.0603999	0.0861345
	Road Passenger - LDV - ICE - liquid fuels demand share	[%] - stock				0.996	0.973147	0.904479	0.72614	0.463267	0.253034	0.121113	0.0693838
	Road Passenger - LDV - PHEV - electricity/ liquid fuels demand share	[%] - stock				0.002	0.0134263	0.0475777	0.0790008	0.1	0.1	0.1	0.1	1	4.9133e+06
	Road Passenger - BUS - BEV - electricity demand share	[%] - stock				0.1	0.13512	0.276107	0.515285	0.742037	0.869098	0.9	0.9		3.82625e+07
	Road Passenger - BUS - FCEV - hydrogen demand share	[%] - stock				0.001	0.001	0.001	0.001	0.001	0.001	0.001	0.001
	Road Passenger - BUS - ICE - liquid fuels demand share	[%] - stock				0.894	0.857124	0.710878	0.463206	0.226529	0.089369	0.0484375	0.0386315
	Road Passenger - BUS - PHEV - electricity/ liquid fuels demand share	[%] - stock				0.005	0.006756	0.0120152	0.0205095	0.0304335	0.0405333	0.0505625	0.0603685		1.28325e+06
	Road Passenger - 2W/3W - BEV - electricity demand share	[%] - stock				0.257138	0.305168	0.354267	0.460631	0.598091	0.744166	0.841381	0.906649		1.38116e+07
	Road Passenger - 2W/3W - ICE - liquid fuels demand share	[%] - stock				0.742862	0.694832	0.645733	0.539369	0.401909	0.255834	0.158619	0.0933511
Rail	rail freight - electricity demand share	[%] - stock				0.387524	0.422592	0.48638	0.560624	0.640742	0.723742	0.800232	0.876709	electricity	1.91623e+07
	rail freight - liquid fuels demand share	[%] - stock				0.612476	0.577408	0.51362	0.439376	0.359258	0.276258	0.199768	0.123291	liquid fuels
	rail passenger - electricity demand share	[%] - stock				0.452318	0.479666	0.530405	0.592279	0.672354	0.751854	0.808812	0.865851	electricity	7.09388e+06
	rail passenger - liquid fuels demand share	[%] - stock				0.547682	0.520334	0.469595	0.407721	0.327646	0.248146	0.191188	0.134149	liquid fuels
Aviation	aviation freight - electricity demand share	[%] - stock				0	0	0	0	0	0	0	0		0
	aviation freight - hydrogen demand share	[%] - stock				0	0	0	0	0.0233637	0.0934548	0.210273	0.373819
	aviation freight - liquid fuels demand share	[%] - stock				1	1	1	1	0.976636	0.906545	0.789727	0.626181
	aviation passenger - electricity demand share	[%] - stock				0	0	0	0	0.0116819	0.0467274	0.105137	0.18691	electricity	4.92742e+06
	aviation passenger - hydrogen demand share	[%] - stock				0	0	0	0	0.0233637	0.0934548	0.210273	0.373819	hydrogen
	aviation passenger - liquid fuels demand share	[%] - stock				1	1	1	1	0.964954	0.859818	0.68459	0.439271	liquid fuels
Marine	marine freight - electricity demand share	[%] - stock				0	0.00111111	0.00555556	0.0111111	0.0277778	0.0555556	0.0722222	0.0833333	electricity	2.30732e+07
	marine freight - hydrogen demand share	[%] - stock				0	0	0	0.01	0.03	0.1	0.25	0.45	hydrogen
	marine freight - LNG demand share	[%] - stock				0	0.005	0.01	0.02	0.03	0.05	0.1	0.2	LNG/ RE-LNG
	marine freight - liquid fuels demand share	[%] - stock				1	0.993889	0.984444	0.958889	0.912222	0.794444	0.577778	0.266667	liquid fuels
	marine passenger - electricity demand share	[%] - stock				0	0.00111111	0.00555556	0.0111111	0.0277778	0.0555556	0.0777778	0.0888889		43664.7
	marine passenger - hydrogen demand share	[%] - stock				0	0	0	0.01	0.03	0.1	0.25	0.45
	marine passenger - LNG demand share	[%] - stock				0	0.005	0.01	0.02	0.03	0.05	0.1	0.2
	marine passenger - liquid fuels demand share	[%] - stock				1	0.993889	0.984444	0.958889	0.912222	0.794444	0.572222	0.261111
														elec p-km	1.17231e+08	0.752518
														elec t-km	6.18111e+07	0.18595
	Final Energy Demand
						2015	2020	2025	2030	2035	2040	2045	2050
Road	Road Freight - MDV - BEV - electricity demand share	[TWh,el/a]				3.2046	60.0219	168.827	438.428	824.802	1214.79	1444.91	1532.14	MDV - BEV - electricity			9558.41	0.648411
	Road Freight - MDV - FCEV - hydrogen demand share	[TWh,H2/a]				0	0.891968	10.7012	30.5406	81.1497	186.398	280.062	343.224	MDV - FCEV - hydrogen			1821.82	0.123586
	Road Freight - MDV - ICE - liquid fuels demand share	[TWh,th/a]				3878.41	4042.08	3883.19	3233.18	2202.38	1081.25	425.701	224.823	MDV - ICE - liquid fuels			3361.05	0.228003
	Road Freight - MDV - PHEV - electricity demand share	[TWh,el/a]				1.28184	3.16675	7.35526	13.4817	20.6232	28.7967	37.4045	46.499	MDV - PHEV - electricity			14741.3
	Road Freight - MDV - PHEV - liquid fuels demand share	[TWh,th/a]				4.67279	12.1974	29.8208	57.4806	89.1501	126.533	166.407	208.33	MDV - PHEV - liquid fuels
	Road Freight - HDV - BEV - electricity demand share	[TWh,el/a]				0	8.34624	77.4415	199.553	436.377	821.174	1138.87	1327.61	HDV - BEV - electricity
	Road Freight - HDV - FCEV - hydrogen demand share	[TWh,H2/a]				0	4.87265	25.6467	78.0416	282.728	597.272	867.402	982.198	HDV - FCEV - hydrogen
	Road Freight - HDV - ICE - liquid fuels demand share	[TWh,th/a]				4353.96	4552.02	4454.51	4188.22	3438.72	2185.38	996.348	330.739	HDV - ICE - liquid fuels
	Road Freight - HDV - PHEV - electricity demand share	[TWh,el/a]				0	7.07994	14.0128	20.8781	28.6678	59.5388	123.436	135.416	HDV - PHEV - electricity
	Road Freight - HDV - PHEV - liquid fuels demand share	[TWh,th/a]				0	32.1484	65.8486	101.537	139.147	288.797	596.515	649.342	HDV - PHEV - liquid fuels
	Road Passenger - LDV - BEV - electricity demand share	[TWh,el/a]				5.23167	82.9399	279.549	1096.31	2034.26	2345.32	2435.36	2649.63	LDV - BEV - electricity
	Road Passenger - LDV - FCEV - hydrogen demand share	[TWh,H2/a]				0	0	1.56296	19.5195	56.4595	158.438	319.043	491.393	LDV - FCEV - hydrogen
	Road Passenger - LDV - ICE - liquid fuels demand share	[TWh,th/a]				11165.9	12177.7	11749.9	9661.77	6434.49	3701.31	1717.2	923.606	LDV - ICE - liquid fuels
	Road Passenger - LDV - PHEV - electricity demand share	[TWh,el/a]				3.66217	27.8395	103.742	173.219	233.341	247.209	260.217	271.936	LDV - PHEV - electricity
	Road Passenger - LDV - PHEV - liquid fuels demand share	[TWh,th/a]				6.72644	42.0034	135.976	231.255	305.566	321.811	311.927	292.854	LDV - PHEV - liquid fuels
	Road Passenger - BUS - BEV - electricity demand share	[TWh,el/a]				198.229	293.98	638.561	1272.6	1959.17	2468.54	2744.79	2892.71	BUS - BEV - electricity
	Road Passenger - BUS - FCEV - hydrogen demand share	[TWh,H2/a]				3.30441	3.59451	3.78407	3.99855	4.23335	4.51011	4.79579	5.00533	BUS - FCEV - hydrogen
	Road Passenger - BUS - ICE - liquid fuels demand share	[TWh,th/a]				3872.57	4150.33	3616.62	2648.85	1411.87	610.889	362.439	310.578	BUS - ICE - liquid fuels
	Road Passenger - BUS - PHEV - electricity demand share	[TWh,el/a]				4.95573	7.34949	13.894	25.3261	40.1762	57.5643	77.1019	97.0158	BUS - PHEV - electricity
	Road Passenger - BUS - PHEV - liquid fuels demand share	[TWh,th/a]				10.8293	16.3568	30.564	58.6419	94.8399	138.534	189.169	242.667	BUS - PHEV - liquid fuels
	Road Passenger - 2W/3W - BEV - electricity demand share	[TWh,el/a]				49.5754	75.3083	104.018	157.094	230.414	331.434	444.601	605.454	2W/3W - BEV - electricity
	Road Passenger - 2W/3W - ICE - liquid fuels demand share	[TWh,th/a]				409.204	489.909	541.703	525.563	442.385	325.549	239.477	178.112	2W/3W - ICE - liquid fuels
Rail	Rail Freight - electricity demand share	[TWh,el/a]				146.905	166.073	193.645	226.118	261.735	300.606	337.075	372.6	Freight - electricity
	Rail Freight - liquid fuels demand share	[TWh,th/a]				440.671	443.96	413.736	372.151	321.268	263.235	203.581	134.739	Freight - liquid fuels
	Rail Passenger - electricity demand share	[TWh,el/a]				117.495	143.481	172.358	206.774	243.683	284.149	319.051	354.694	Passenger - electricity
	Rail Passenger - liquid fuels demand share	[TWh,th/a]				219.985	246.459	247.77	237.332	203.64	165.697	137.553	103.687	Passenger - liquid fuels
Aviation	Aviation Freight - electricity demand share	[TWh,el/a]				0	0	0	0	0	0	0	0	Freight - electricity
	Aviation Freight - hydrogen demand share	[TWh,H2/a]				0	0	0	0	1.22423	6.33309	18.1256	39.9977	Freight - hydrogen
	Aviation Freight - liquid fuels demand share	[TWh,th/a]				28.0086	35.5559	45.1514	57.3667	71.1329	85.3922	94.6236	93.1296	Freight - liquid fuels
	Aviation Passenger - electricity demand share	[TWh,el/a]				0	0	0	0	25.4032	125.089	337.57	697.118	Passenger - electricity
	Aviation Passenger - hydrogen demand share	[TWh,H2/a]				0	0	0	0	97.4703	479.959	1295.23	2674.79	Passenger - hydrogen
	Aviation Passenger - liquid fuels demand share	[TWh,th/a]				3065.95	3547.22	4135.19	4964.15	5595.67	6137.96	5861.5	4368.94	Passenger - liquid fuels
Marine	Marine Freight - electricity demand share	[TWh,el/a]				0	2.17448	12.9442	30.7538	90.9235	215.954	335.292	464.792	Freight - electricity			1903.41	0.106928
	Marine Freight - hydrogen demand share	[TWh,H2/a]				0	0	0	48.1292	157.389	577.809	1684.46	3558.62	Freight - hydrogen			6375.37	0.358149
	Marine Freight - LNG demand share	[TWh,CH4/a]				0	20.1456	45.7885	104.058	182.604	357.577	845.128	2009.52	Freight - LNG			2067.09	0.116123
	Marine Freight - liquid fuels demand share	[TWh,th/a]				3537	4004.51	4507.63	4989.02	5552.51	5681.49	4882.96	2679.36	Freight - liquid fuels			7455.02	0.4188
	Marine Passenger - electricity demand share	[TWh,el/a]				0	0.0537411	0.331068	0.818581	2.51345	6.14178	10.4054	14.2047	Passenger - electricity			17800.9
	Marine Passenger - hydrogen demand share	[TWh,H2/a]				0	0	0	1.28106	4.35079	16.433	48.5413	101.959	Passenger - hydrogen
	Marine Passenger - LNG demand share	[TWh,CH4/a]				0	0.49789	1.17112	2.76974	5.04782	10.1696	24.3541	57.5752	Passenger - LNG
	Marine Passenger - liquid fuels demand share	[TWh,th/a]				85.5279	98.9694	115.29	132.794	153.491	161.583	139.36	75.1677	Passenger - liquid fuels
					Sum	31613.3	34799.2	35848.2	35609	33761	32176.6	31758	32542.2
Fuel form	Transport Total Electricity	[TWh,el/a]				530.541	877.813	1786.68	3861.35	6432.09	8506.3	10046.1	11461.8	0.352214
	Transport Total Hydrogen	[TWh,H2/a]				3.30441	9.35912	41.6949	181.511	685.005	2027.15	4517.66	8197.19	0.251894
	Transport Total LNG	[TWh,CH4/a]				0	20.6435	46.9596	106.828	187.652	367.746	869.482	2067.09	0.0635204
	Transport Total Liquid fuels	[TWh,th/a]				31079.4	33891.4	33972.9	31459.3	26456.3	21275.4	16324.8	10816.1	0.332371
	Sum				Sum	31613.3	34799.2	35848.2	35609	33761	32176.6	31758	32542.2
	Total All Final Energy Demand
				0.114589	3622.53	23971.7	0.75828	3093.96	0.0978692		0.241962	7873.98	14741.3	0.45299	8961.19	0.275372
Road	Road Freight	[TWh/a]				8241.53	8722.82	8737.36	8361.34	7543.74	6589.93	6077.06	5780.32	Total Road [TWh/a]		23971.7	26090.1	25957.2	24235.5	20790.9	17301	15183.2	14741.3
	Road Passenger	[TWh/a]				15730.2	17367.3	17219.9	15874.1	13247.2	10711.1	9106.12	8960.96
Rail	Rail Freight	[TWh/a]				587.576	610.032	607.381	598.269	583.003	563.841	540.656	507.34	Total Rail [TWh/a]		925.057	999.972	1027.51	1042.38	1030.33	1013.69	997.26	965.72
	Rail Passenger	[TWh/a]				337.481	389.939	420.128	444.106	447.324	449.846	456.604	458.381
Aviation	Aviation Freight	[TWh/a]				28.0086	35.5559	45.1514	57.3667	72.3572	91.7253	112.749	133.127	Total Aviation [TWh/a]		3093.96	3582.78	4180.34	5021.52	5790.9	6834.73	7607.06	7873.98
	Aviation Passenger	[TWh/a]				3065.95	3547.22	4135.19	4964.15	5718.54	6743.01	7494.31	7740.86
Marine	Marine Freight	[TWh/a]				3537	4026.83	4566.36	5171.96	5983.43	6832.83	7747.84	8712.29	Total Marine [TWh/a]		3622.53	4126.35	4683.15	5309.63	6148.83	7027.16	7970.5	8961.19
	Marine Passenger	[TWh/a]				85.5279	99.5211	116.792	137.663	165.403	194.327	222.66	248.907
					Sum	31613.3	34799.2	35848.2	35609	33761	32176.6	31758	32542.2
	Freight Total All	[TWh/a]				12394.1	13395.2	13956.3	14188.9	14182.5	14078.3	14478.3	15133.1
	Passenger Total All	[TWh/a]				19219.1	21404	21892	21420.1	19578.5	18098.3	17279.7	17409.1
	Transport Total All	[TWh/a]				31613.3	34799.2	35848.2	35609	33761	32176.6	31758	32542.2
	Transport Total All	[TWh/a]				31613.3	34799.2	35848.2	35609	33761	32176.6	31758	32542.2

## Sheet: GHG emissions
	GHG emissions - based on Final energy demand			TTW
			2015	2020	2025	2030	2035	2040	2045	2050
TTW	Road Freight - MDV	[MtCO2eq]	1031.85	1076.82	1039.3	847.735	498.87	182.585	42.2411	4.3898
TTW	Road Freight - HDV	[MtCO2eq]	1156.98	1217.56	1200.62	1105.12	778.908	374.031	113.635	9.93265
TTW	Road Passenger - LDV	[MtCO2eq]	2968.89	3245.58	3156.91	2548.63	1467.32	608.191	144.758	12.3282
TTW	Road Passenger - BUS	[MtCO2eq]	1031.94	1106.68	968.7	697.5	328.013	113.293	39.3519	5.60687
TTW	Road Passenger - 2W/3W	[MtCO2eq]	108.738	130.121	143.877	135.395	96.308	49.2145	17.0843	1.80508
TTW	Rail Freight	[MtCO2eq]	117.099	117.917	109.889	95.873	69.9406	39.7943	14.5235	1.36552
TTW	Rail Passenger	[MtCO2eq]	58.4566	65.4599	65.8081	61.1411	44.3329	25.0491	9.81304	1.05081
TTW	Aviation Freight	[MtCO2eq]	7.44271	9.44373	11.9923	14.7787	15.4858	12.9091	6.75047	0.943824
TTW	Aviation Passenger	[MtCO2eq]	814.715	942.15	1098.32	1278.86	1218.19	927.899	418.161	44.2771
TTW	Marine Freight	[MtCO2eq]	939.886	1068.37	1208.07	1309.16	1244.23	907.134	394.358	27.154
TTW	Marine Passenger	[MtCO2eq]	22.7273	26.4043	30.8984	34.8461	34.395	25.7991	11.2677	0.761788
TTW	Road	[MtCO2eq]	6298.39	6776.77	6509.41	5334.38	3169.42	1327.32	357.071	34.0626
TTW	Rail	[MtCO2eq]	175.556	183.377	175.697	157.014	114.273	64.8434	24.3366	2.41633
TTW	Aviation	[MtCO2eq]	822.157	951.594	1110.31	1293.64	1233.67	940.808	424.912	45.2209
TTW	Marine	[MtCO2eq]	962.613	1094.78	1238.97	1344	1278.63	932.933	405.626	27.9158
TTW	Transport	[MtCO2eq]	8258.72	9006.52	9034.39	8129.03	5796	3265.9	1211.95	109.616
			2015	2020	2025	2030	2035	2040	2045	2050
				WTW
WTW	Road Freight - MDV	[MtCO2eq]	1431.85	1509.62	1462.22	1206.09	722.947	274.368	65.7927	3.53755
WTW	Road Freight - HDV	[MtCO2eq]	1602.9	1687.58	1677.9	1563.33	1138.67	565.792	174.564	8.0043
WTW	Road Passenger - LDV	[MtCO2eq]	4117.74	4519.28	4409.93	3605.67	2096.01	874.613	207.435	9.9348
WTW	Road Passenger - BUS	[MtCO2eq]	1535.22	1640.6	1429.27	1031.53	490.395	173.773	58.3691	4.51834
WTW	Road Passenger - 2W/3W	[MtCO2eq]	176.087	207.59	213.093	195.567	138.285	70.6877	23.8988	1.45464
WTW	Rail Freight	[MtCO2eq]	237.617	224.569	178.763	143.926	101.885	57.3562	20.2433	1.10041
WTW	Rail Passenger	[MtCO2eq]	141.28	143.776	114.96	94.7514	65.7845	36.6828	13.8411	0.846807
WTW	Aviation Freight	[MtCO2eq]	10.3113	13.0297	16.5461	20.5341	21.8437	18.42	9.51803	0.760587
WTW	Aviation Passenger	[MtCO2eq]	1128.73	1299.91	1515.37	1776.89	1718.9	1326.38	593.908	35.681
WTW	Marine Freight	[MtCO2eq]	1302.14	1474.34	1667.42	1828.54	1761.5	1299.82	568.274	21.8822
WTW	Marine Passenger	[MtCO2eq]	31.4869	36.4376	42.6469	48.6706	48.6941	36.9672	16.2468	0.613892
WTW	Road	[MtCO2eq]	8863.8	9564.67	9192.41	7602.19	4586.3	1959.23	530.059	27.4496
WTW	Rail	[MtCO2eq]	378.897	368.345	293.723	238.677	167.67	94.039	34.0845	1.94722
WTW	Aviation	[MtCO2eq]	1139.04	1312.94	1531.92	1797.42	1740.74	1344.8	603.426	36.4416
WTW	Marine	[MtCO2eq]	1333.63	1510.78	1710.06	1877.21	1810.19	1336.79	584.52	22.4961
WTW	Transport	[MtCO2eq]	11715.4	12756.7	12728.1	11515.5	8304.91	4734.86	1752.09	88.3346
			2015	2020	2025	2030	2035	2040	2045	2050	Specification
Road Freight	Road Freight - MDV - BEV - electricity demand share	[TWh,el/a]	3.2046	60.0219	168.827	438.428	824.802	1214.79	1444.91	1532.14	MDV - BEV - electricity
	Road Freight - MDV - FCEV - hydrogen demand share	[TWh,H2/a]	0	0.891968	10.7012	30.5406	81.1497	186.398	280.062	343.224	MDV - FCEV - hydrogen
	Road Freight - MDV - ICE - liquid fuels demand share	[TWh,th/a]	3878.41	4042.08	3883.19	3233.18	2202.38	1081.25	425.701	224.823	MDV - ICE - liquid fuels
	Road Freight - MDV - PHEV - electricity demand share	[TWh,el/a]	1.28184	3.16675	7.35526	13.4817	20.6232	28.7967	37.4045	46.499	MDV - PHEV - electricity
	Road Freight - MDV - PHEV - liquid fuels demand share	[TWh,th/a]	4.67279	12.1974	29.8208	57.4806	89.1501	126.533	166.407	208.33	MDV - PHEV - liquid fuels
	Road Freight - HDV - BEV - electricity demand share	[TWh,el/a]	0	8.34624	77.4415	199.553	436.377	821.174	1138.87	1327.61	HDV - BEV - electricity
	Road Freight - HDV - FCEV - hydrogen demand share	[TWh,H2/a]	0	4.87265	25.6467	78.0416	282.728	597.272	867.402	982.198	HDV - FCEV - hydrogen
	Road Freight - HDV - ICE - liquid fuels demand share	[TWh,th/a]	4353.96	4552.02	4454.51	4188.22	3438.72	2185.38	996.348	330.739	HDV - ICE - liquid fuels
	Road Freight - HDV - PHEV - electricity demand share	[TWh,el/a]	0	7.07994	14.0128	20.8781	28.6678	59.5388	123.436	135.416	HDV - PHEV - electricity
	Road Freight - HDV - PHEV - liquid fuels demand share	[TWh,th/a]	0	32.1484	65.8486	101.537	139.147	288.797	596.515	649.342	HDV - PHEV - liquid fuels
Road Passenger	Road Passenger - LDV - BEV - electricity demand share	[TWh,el/a]	5.23167	82.9399	279.549	1096.31	2034.26	2345.32	2435.36	2649.63	LDV - BEV - electricity
	Road Passenger - LDV - FCEV - hydrogen demand share	[TWh,H2/a]	0	0	1.56296	19.5195	56.4595	158.438	319.043	491.393	LDV - FCEV - hydrogen
	Road Passenger - LDV - ICE - liquid fuels demand share	[TWh,th/a]	11165.9	12177.7	11749.9	9661.77	6434.49	3701.31	1717.2	923.606	LDV - ICE - liquid fuels
	Road Passenger - LDV - PHEV - electricity demand share	[TWh,el/a]	3.66217	27.8395	103.742	173.219	233.341	247.209	260.217	271.936	LDV - PHEV - electricity
	Road Passenger - LDV - PHEV - liquid fuels demand share	[TWh,th/a]	6.72644	42.0034	135.976	231.255	305.566	321.811	311.927	292.854	LDV - PHEV - liquid fuels
	Road Passenger - BUS - BEV - electricity demand share	[TWh,el/a]	198.229	293.98	638.561	1272.6	1959.17	2468.54	2744.79	2892.71	BUS - BEV - electricity
	Road Passenger - BUS - FCEV - hydrogen demand share	[TWh,H2/a]	3.30441	3.59451	3.78407	3.99855	4.23335	4.51011	4.79579	5.00533	BUS - FCEV - hydrogen
	Road Passenger - BUS - ICE - liquid fuels demand share	[TWh,th/a]	3872.57	4150.33	3616.62	2648.85	1411.87	610.889	362.439	310.578	BUS - ICE - liquid fuels
	Road Passenger - BUS - PHEV - electricity demand share	[TWh,el/a]	4.95573	7.34949	13.894	25.3261	40.1762	57.5643	77.1019	97.0158	BUS - PHEV - electricity
	Road Passenger - BUS - PHEV - liquid fuels demand share	[TWh,th/a]	10.8293	16.3568	30.564	58.6419	94.8399	138.534	189.169	242.667	BUS - PHEV - liquid fuels
	Road Passenger - 2W/3W - BEV - electricity demand share	[TWh,el/a]	49.5754	75.3083	104.018	157.094	230.414	331.434	444.601	605.454	2W/3W - BEV - electricity
	Road Passenger - 2W/3W - ICE - liquid fuels demand share	[TWh,th/a]	409.204	489.909	541.703	525.563	442.385	325.549	239.477	178.112	2W/3W - ICE - liquid fuels
Rail Freight	Rail Freight - electricity demand share	[TWh,el/a]	146.905	166.073	193.645	226.118	261.735	300.606	337.075	372.6	Freight - electricity
	Rail Freight - liquid fuels demand share	[TWh,th/a]	440.671	443.96	413.736	372.151	321.268	263.235	203.581	134.739	Freight - liquid fuels
Rail Passenger	Rail Passenger - electricity demand share	[TWh,el/a]	117.495	143.481	172.358	206.774	243.683	284.149	319.051	354.694	Passenger - electricity
	Rail Passenger - liquid fuels demand share	[TWh,th/a]	219.985	246.459	247.77	237.332	203.64	165.697	137.553	103.687	Passenger - liquid fuels
Aviation Freight	Aviation Freight - electricity demand share	[TWh,el/a]	0	0	0	0	0	0	0	0	Freight - electricity
	Aviation Freight - hydrogen demand share	[TWh,H2/a]	0	0	0	0	1.22423	6.33309	18.1256	39.9977	Freight - hydrogen
	Aviation Freight - liquid fuels demand share	[TWh,th/a]	28.0086	35.5559	45.1514	57.3667	71.1329	85.3922	94.6236	93.1296	Freight - liquid fuels
Aviation Passenger	Aviation Passenger - electricity demand share	[TWh,el/a]	0	0	0	0	25.4032	125.089	337.57	697.118	Passenger - electricity
	Aviation Passenger - hydrogen demand share	[TWh,H2/a]	0	0	0	0	97.4703	479.959	1295.23	2674.79	Passenger - hydrogen
	Aviation Passenger - liquid fuels demand share	[TWh,th/a]	3065.95	3547.22	4135.19	4964.15	5595.67	6137.96	5861.5	4368.94	Passenger - liquid fuels
Marine Freight	Marine Freight - electricity demand share	[TWh,el/a]	0	2.17448	12.9442	30.7538	90.9235	215.954	335.292	464.792	Freight - electricity
	Marine Freight - hydrogen demand share	[TWh,H2/a]	0	0	0	48.1292	157.389	577.809	1684.46	3558.62	Freight - hydrogen
	Marine Freight - LNG demand share	[TWh,CH4/a]	0	20.1456	45.7885	104.058	182.604	357.577	845.128	2009.52	Freight - LNG
	Marine Freight - liquid fuels demand share	[TWh,th/a]	3537	4004.51	4507.63	4989.02	5552.51	5681.49	4882.96	2679.36	Freight - liquid fuels
Marine Passenger	Marine Passenger - electricity demand share	[TWh,el/a]	0	0.0537411	0.331068	0.818581	2.51345	6.14178	10.4054	14.2047	Passenger - electricity
	Marine Passenger - hydrogen demand share	[TWh,H2/a]	0	0	0	1.28106	4.35079	16.433	48.5413	101.959	Passenger - hydrogen
	Marine Passenger - LNG demand share	[TWh,CH4/a]	0	0.49789	1.17112	2.76974	5.04782	10.1696	24.3541	57.5752	Passenger - LNG
	Marine Passenger - liquid fuels demand share	[TWh,th/a]	85.5279	98.9694	115.29	132.794	153.491	161.583	139.36	75.1677	Passenger - liquid fuels
Direct Combustion	GHG emissions - TTW - electricity	[gCO2eq/kWh,el]	0	0	0	0	0	0	0	0
	GHG emissions - TTW - hydrogen	[gCO2eq/kWh,H2]	0	0	0	0	0	0	0	0
	GHG emissions - TTW - LNG	[gCO2eq/kWh,CH4]	236.684	236.684	236.684	229.584	194.081	134.91	54.4373	0		rem.: electricity accounted with zero
	GHG emissions - TTW - liquid fuels	[gCO2eq/kWh,th]	265.73	265.602	265.602	257.619	217.702	151.174	71.3403	10.1345		rem.: electricity accounted with zero
	GHG emissions - PTG - electricity	[gCO2eq/kWh,el]	446.1	330.8	124.4	42	13.8	5.4	1.6	0		ref.: Breyer et al., 2018
Total Value Chain	GHG emissions - WTW - electricity	[gCO2eq/kWh,el]	513.152	372.587	140.188	47.3947	15.4691	6.10061	1.78988	2.14319e-07		rem.: adjusted for WTW values including full LCA emissions
	GHG emissions - WTW - hydrogen	[gCO2eq/kWh,H2]	389.222	394.655	333.639	222.822	148.198	64.5565	21.4854	2.55141e-07
	GHG emissions - WTW - LNG	[gCO2eq/kWh,CH4]	300.27	300.27	300.27	293.756	251.106	175.756	71.4799	3.75998e-07
	GHG emissions - WTW - liquid fuels	[gCO2eq/kWh,th]	368.148	366.458	366.458	357.944	304.532	210.923	96.4728	8.16697
	GHG emissions - ICE	[MtCO2eq]	722.699	2.17116	0.172183	0.0650379	0.0172582	0	0	0
	GHG emissions - CCGT	[MtCO2eq]	1242.61	1441.79	648.909	270.524	80.117	28.9995	10.4063	0
	GHG emissions - OCGT	[MtCO2eq]	1354.66	81.8858	38.7759	4.17535	4.44383	3.04504	1.46991	0
	GHG emissions - hard coal PP	[MtCO2eq]	7398.95	6981.65	2892.41	1124.63	439.442	202.145	65.8144	1.07242e-05
	GHG emissions - total	[MtCO2eq]	10719.1	8507.1	3580.2	1399.2	524	234.1	77.3	0
	Total electricity generation	[TWh,el]	24029.8	25716.6	28791	33296.9	38098.1	43090.9	48783.7	55572.8
	hydrogen, H2
	efficiency - power-to-hydrogen		0.84	0.84	0.84	0.84	0.84	0.84	0.84	0.84
	thereof electricity share hydrogen		0	0.1	0.25	0.5	0.65	0.85	0.95	1
	thereof RE electricity		0.223	0.4019	0.737	0.8941	0.9606	0.9801	0.9902	0.9965
	methane, LNG
	efficiency - power-to-methane		0.57	0.57	0.57	0.57	0.57	0.57	0.57	0.57
	thereof electricity share methane		0	0	0	0.03	0.18	0.43	0.77	1
	thereof RE electricity		0.223	0.4019	0.737	0.8941	0.9606	0.9801	0.9902	0.9965
	liquid fuels (diesel, kerosene)
	efficiency - power-to-fuel (diesel, kerosene)		n/a	n/a	n/a	0.53	0.53	0.53	0.53	0.53
	RE share fuels		0.03	0.04	0.04	0.07	0.22	0.47	0.77	1
	thereof biofuels		0.03	0.04	0.04	0.04	0.04	0.04	0.04	0.04
	thereof FT-fuels		0	0	0	0.03	0.18	0.43	0.73	0.96

## Sheet: 145-Regions
145 Regions				Road Million p-km																Road Million t-km													Rail Million p-km													Rail Million t-km
	Abbr.	Countries		2000	2005	2010	2015	2020	2025	2030	2035	2040	2045	2050			2000	2005	2010	2015	2020	2025	2030	2035	2040	2045	2050			2000	2005	2010	2015	2020	2025	2030	2035	2040	2045	2050			2000	2005	2010	2015	2020	2025	2030
1	'NO'	Norway		148965	147570	149897	181535	195902	201721	205784	209134	213178	219094	227139	0.00847272		40810.4	47067.1	47181.8	53635.2	54781.3	54118	53249.1	52603.8	52624.7	53654.2	55821.4	0.00628407		23908.3	24603.6	25114.1	29047.1	29966.4	29603.1	28822.6	27796.7	26711.7	25666.4	24611.6	0.000579978		36154.5	38884.5	40614.6	46169.8	47156.3	46585.4	45837.4
2	'DK'	Denmark		74731.8	76472.4	75701.4	79377.8	82762.6	85400.8	88600.6	92714.4	98099.2	104970	113430	0.00838051		30861.9	33429.3	34995.6	36400.4	37708.3	38824.5	40251.4	42081.4	44586.3	47833.5	51967.9	0.0104765		6799.73	6758.34	6690.2	6864.34	7011.01	7095.13	7199.51	7345.92	7555.39	7832.85	8170.21	0.00367899		7620.5	7350.81	6128.22	5811.27	5636.19	5450.03	5291.96
3	'SE'	Sweden		109678	119525	127654	144149	164446	185852	208558	231348	253926	276335	298465	0.0202239		45293.6	52249.4	59012.8	66102.5	74924.7	84491.3	94748.4	105005	115410	125922	136742	0.0223445		9979.41	10563.2	11281.6	12465.5	13930.6	15440.7	16947	18330.1	19556.9	20620.1	21498.1	0.0154672		11184	11489.2	10333.9	10553.2	11198.9	11860.6	12456.8
4	'FI'	Finland		59993.8	65253.9	67119.9	71655.6	80030.6	88947	98901.6	109277	119480	129194	138297	0.0168435		24775.6	28525.2	31028.6	32859.2	36463.5	40436.7	44931.2	49599.1	54303.6	58871.9	63360.6	0.0189571		5458.74	5766.89	5931.8	6196.55	6779.57	7389.75	8036.55	8658.24	9202.05	9640.42	9961.34	0.0121025		6117.65	6272.45	5433.53	5245.92	5450.13	5676.34	5907.22
5	'BLT'	Baltic: Estonia, Latvia, Lithuania		30013.1	41653.7	41886.8	50096.9	50751.5	51183.6	52200.9	54103.9	57222.7	61701.4	67528.8	0.0163507		12394.5	18208.6	19363.7	22973	23123.4	23268.8	23715	24556.8	26007.8	28116.5	30938.3	0.0184632		2730.84	3681.19	3701.8	4332.23	4299.27	4252.35	4241.74	4286.74	4407.17	4604.15	4864.01	0.011612		3060.47	4003.91	3390.85	3667.61	3456.21	3266.39	3117.87
6	'PL'	Poland		189186	209990	262527	321269	378713	429593	475289	515221	550934	584129	615933	0.023889		78128.2	91795.6	121362	147325	172549	195300	215925	233850	250400	266180	282189	0.0260172		17213.8	18558.1	23201.1	27782.3	32081.7	35690.8	38621.1	40821.9	42431.8	43587.6	44364.9	0.0191152		19291.6	20185	21252.2	23520.2	25790.6	27415.4	28388.2
7	'IBE'	Iberia: Portugal, Spain, Gibraltar		509336	560513	579367	619617	648153	667289	689408	720429	761336	812455	872505	0.0108234		210340	245024	267833	284139	295311	303360	313199	326990	346028	370225	399738	0.0129244		46343.7	49536	51202.2	53582.6	54906.6	55438.6	56020	57080.8	58636.4	60625.3	62845.4	0.00611045		51937.7	53878.6	46901.2	45362.3	44139.7	42584.5	41177.1
8	'FR'	France, Monaco, Andorra		694742	717794	735217	800969	866918	927036	996262	1.07869e+06	1.17519e+06	1.28423e+06	1.40329e+06	0.01416		286721	313603	339660	367105	394757	421191	452324	489298	533799	584858	642549	0.0162696		63306.8	63551.9	65093.8	69354	73526.8	77105.3	81038.2	85547	90586	95899	101141	0.00941441		71032.6	69244.9	59801.2	58857.5	59260.6	59388.6	59737.6
9	'BNL'	Belgium, Netherlands, Luxembourg		363264	376907	397215	426218	445630	458697	474635	495892	523890	558912	600512	0.0101038		150017	164762	183627	195451	203038	208531	215627	225077	238109	254689	275124	0.0122033		33052.9	33309.6	35104.3	36858	37750.4	38108.7	38567.9	39290.4	40348.9	41705.9	43254.1	0.0053942		37042.5	36229.7	32155.6	31203.5	30347.7	29272.7	28349.1
10	'BRI'	British Isles: Ireland, United Kingdom, Isle of Man, Guernsey, Jersey		701648	776741	784810	912578	1.06674e+06	1.23675e+06	1.42102e+06	1.60411e+06	1.77464e+06	1.92751e+06	2.06207e+06	0.0217948		289759	339546	362806	418482	486027	562245	645571	728076	806578	878343	944738	0.0239187		63841.9	68645.4	69358.5	78916.8	90365.9	102750	115469	127096	136679	143831	148528	0.0170307		71548	74663.2	63532.4	66810	72645.6	78925.7	84874.9
11	'DE'	Germany		1.01687e+06	990276	1.03743e+06	1.15924e+06	1.21127e+06	1.25188e+06	1.29829e+06	1.35432e+06	1.42089e+06	1.49537e+06	1.57298e+06	0.00876309		419936	432891	479590	531595	551880	569125	589814	614702	645796	681420	720662	0.0108599		92523.4	87516.8	91684.4	100248	102610	104007	105496	107305	109434	111584	113300	0.00405979		103692	95189	83982.9	84868.4	82488.6	79891.6	77544.5
12	'CRS'	Czech Republic, Slovakia		99942	117812	135697	150647	163069	174264	185999	198671	213132	229855	248693	0.0183998		41273	51500.8	62730.8	69082.3	74297.4	79223	84499.5	90173.2	96868.9	104742	113938	0.0205166		9093.57	10411.8	11992.4	13027.5	13814	14477.9	15113.9	15741	16415	17151.7	17913	0.0136515		10191.2	11324.6	10985	11028.9	11105.1	11121	11109.4
13	'AUH'	Austria, Hungary		165398	180391	184715	210706	235822	257564	277888	296949	315616	334602	353999	0.0153352		68304.3	78856.6	85391	96624	107445	117093	126245	134780	143448	152474	162185	0.0174457		15049.3	15942.3	16324.4	18221.2	19977.1	21398.5	22580.6	23527.8	24308.1	24968	25498.1	0.0106013		16865.8	17339.9	14953.1	15425.9	16059.7	16437	16597.7
14	'BKN-W'	Balkan-West: Slovenia, Croatia, Bosnia and Hertzegovina, Serbia, Montenegro, Macedonia, Albania		126495	143078	158191	169853	193642	218392	248296	283238	322667	365719	410818	0.0238387		36069.3	47112.6	52145.8	53089	57374.5	62065.2	67993	75284.7	84068.2	94426	106358	0.021863		19594.6	22874.9	25240.9	25868.2	28369.9	30862.2	33651.2	36574	39404.2	41861.7	43591.2	0.0161206		29268.6	35607.8	39831.3	39972.8	43449.1	47318.9	52185.9
15	'BKN-E'	Balkan-East: Romania, Bulgaria, Greece		192546	235247	251021	255381	286852	322921	364152	406313	446290	482769	516026	0.0199121		79515.6	102837	116043	117110	130695	146805	165435	184418	202839	219991	236417	0.0220321		17519.5	20790.3	22184.2	22084.6	24299.9	26828.3	29590.3	32192.9	34372.3	36024.1	37168.7	0.0151568		19634.2	22612.9	20320.8	18696.5	19534.8	20607.9	21750.2
16	'IT'	Italy, San Marino, Vatican, Malta		695537	703225	679369	646461	636862	620967	612710	617305	637925	675982	731910	0.00102		287236	307409	314063	296449	290167	282301	278355	280184	289938	308036	335324	0.00310071		63285.8	62148.3	60040	55903.9	53950.1	51590.2	49787.6	48910.1	49131.6	50441.7	52718.6	-0.00364721		70924.8	67596.5	54996.7	47327.6	43370.8	39628.3	36596.1
17	'CH'	Switzerland, Liechtenstein		198719	189918	206566	236743	253403	261927	269761	277925	287821	300509	316010	0.0093208		54441.2	60574	65018.9	69946.6	70860.7	70270.2	69804	69907	71050.9	73592	77662.4	0.00713031		31893.8	31664.1	34608.5	37880.8	38762.2	38438.5	37783.4	36940	36064.6	35204	34241.2	0.00142142		48230.2	50043.2	55969	60210.9	60997.7	60489.4	60088
18	'TR'	Turkey, Cyprus		126562	169678	236555	235125	300743	375368	466232	573854	702310	859613	1.05088e+06	0.0432418		26174.9	38753.6	62943.9	64194.3	83410.6	105393	132220	164143	202530	250060	309029	0.0506119		3412.32	4121.55	4304.46	4175.78	5131.47	6193.74	7443.38	8846.2	10400.6	12140.3	14042.8	0.0286985		6818.93	7785.16	8455.2	8170.39	10182.2	12498.6	15345.9
19	'UA'	Ukraine, Moldova		137991	177568	182136	211809	261468	322470	400398	493120	596049	702965	806432	0.0359394		37804	56635	57329.3	62579.8	73116.1	86512.8	103608	124035	147140	172150	198188	0.0336911		22147.1	29605.1	30515.4	33891.2	39995.9	47323.4	56080.8	65542.3	74686.4	82350.7	87380.9	0.0278317		33491.1	46789.1	49349.7	53869.4	62939.1	74471.2	89186.8
20	'IS'	Iceland		5350.45	5837.5	6024.17	6965.71	7839.62	8587.28	9351.21	10120	10901.5	11700.1	12488.1	0.0170964		1465.81	1861.86	1896.18	2058.05	2192.24	2303.81	2419.74	2545.49	2691.14	2865.25	3069.06	0.014889		858.729	973.257	1009.3	1114.57	1199.2	1260.21	1309.75	1345.08	1365.99	1370.64	1353.14	0.00913612		1298.58	1538.17	1632.25	1771.59	1887.11	1983.15	2082.94
21	'DZ'	Algeria		162318	184734	189153	181478	193492	202361	210901	218897	226239	232913	238943	0.00776338		40794.9	50721	50667.7	50243.4	54582.7	57822.6	60904.5	63752.4	66329.9	68635.8	70682.9	0.0110536		2522.05	2832.26	2958.51	2819.53	2996.28	3129.97	3258.01	3377.24	3486.09	3584.39	3672.55	0.0075446		15593	17566.6	18534.4	17326.2	18296.8	19190.4	20001.1
22	'BHQ'	Bahrain and Qatar		13521.1	20792.9	51598.5	52466.2	59575.3	65004.2	69032.1	72659.1	77094.5	83127.9	91047	0.0388792		2570.06	4443.76	13197.5	13828.5	16042.6	17782.8	19120.5	20339	21798.1	23757.9	26358.9	0.0476584		294.268	411.362	748.562	748.109	834.194	893.112	927.492	951.204	979.111	1018.44	1068.26	0.0261214		675.7	880.553	1721.67	1720.35	1924.74	2082.17	2200.48
23	'EG'	Egypt		73456.8	94706.9	154847	140776	217989	346951	549594	831009	1.178e+06	1.57279e+06	2.00707e+06	0.068392		13962.5	20240.3	39605.5	37104.2	58701	94913.2	152227	232620	333072	449504	581066	0.0774205		1598.68	1873.66	2246.43	2007.31	3052.37	4766.87	7384.17	10879	14960.7	19269	23549.2	0.0552717		3670.91	4010.72	5166.72	4615.99	7042.72	11113.3	17518.9
24	'IR'	Iran		111521	158019	243035	188310	234645	286993	348728	424466	522635	651814	815565	0.0405958		21197.6	33771.1	62161.6	49632.8	63186.1	78510.9	96590.7	118818	147772	186288	236113	0.0493894		2427.09	3126.21	3525.82	2685.09	3285.59	3943.09	4685.4	5556.83	6637.53	7985.67	9569.11	0.0278168		5573.11	6691.91	8109.26	6174.64	7580.84	9192.76	11116.1
25	'IQ'	Iraq		40821.7	45378	73099	72334.9	103794	145408	201327	276540	379493	522779	720465	0.0590938		7759.29	9697.98	18696.7	19065.2	27949.9	39778.4	55763.4	77410.3	107300	149410	208581	0.0680438		888.425	897.749	1060.48	1031.41	1453.36	1997.81	2704.96	3620.28	4819.62	6404.8	8453.3	0.0460877		2040.01	1921.7	2439.07	2371.84	3353.33	4657.61	6417.52
26	'IL'	Israel		22360.5	26861.9	41112.6	37734.1	47726.5	58396.3	70067.5	83176.2	99027.1	119393	145671	0.0381924		4250.22	5740.81	10515.5	9945.55	12852	15975.1	19407.3	23283	27999.4	34122.6	42173.2	0.0469658		486.643	531.431	596.44	538.046	668.284	802.323	941.403	1088.89	1257.66	1462.74	1709.18	0.025443		1117.43	1137.57	1371.79	1237.29	1541.93	1870.51	2233.48
27	'JWG'	Jordan (incl. West Bank & Gaza Strip = State of Palestine)		5218.8	7641.98	13708.1	13086.5	16727.5	20598.7	25851.3	32990.5	42549	55747.8	73856.5	0.0544266		991.977	1633.21	3506.16	3449.18	4504.44	5635.05	7160.28	9234.85	12030.5	15932.7	21382.1	0.0633371		113.58	151.187	198.87	186.598	234.224	283.011	347.329	431.89	540.378	682.992	866.567	0.0414778		260.803	323.629	457.394	429.101	540.426	659.802	824.039
28	'KW'	Kuwait		20398.4	32814.1	42127.6	40878.5	49896.1	57687.9	64748.4	71236.8	78507.1	87527.8	98673.6	0.0320295		3877.28	7012.89	10775.1	10774.3	13436.2	15781.3	17934	19940.9	22197.5	25015.4	28566.9	0.0407507		443.941	649.188	611.165	582.882	698.663	792.591	869.938	932.584	997.052	1072.34	1157.75	0.0193557		1019.38	1389.64	1405.66	1340.39	1612.02	1847.82	2063.93
29	'LB'	Lebanon		5677.38	7536.25	13191.1	14724.4	17825.8	19641.4	23177.2	28788.4	35703.2	44445.6	55406.3	0.0466181		1079.14	1610.61	3373.92	3880.91	4800.2	5373.17	6419.61	8058.56	10094.9	12702.6	16040.6	0.0554626		123.56	149.096	191.369	209.954	249.604	269.859	311.401	376.878	453.435	544.523	650.089	0.0337652		283.719	319.151	440.143	482.809	575.91	629.139	738.799
30	'LY'	Libya		60489.9	67631.1	74315.5	32522.2	36433	38987.1	40967.7	42413.4	43466.2	44260.3	44887.7	-0.00594848		15202.8	18568.9	19906.6	9004	10416.5	11349.5	12064.3	12579.2	12948.8	13223.2	13436.1	-0.00246753		939.875	1036.89	1162.36	505.282	562.813	601.316	631.011	652.567	668.176	679.872	689.044	-0.00618959		5810.93	6431.13	7281.9	3104.98	3420.92	3678.27	3866.29
31	'MA'	Morocco		66794.1	73839.8	84803.8	84417.8	90778.3	95404.4	99790.1	103909	107825	111645	115459	0.0110062		16787.2	20273.6	22716.1	23371.7	25668.9	27358.9	28941.6	30408.4	31783.4	33103.4	34398	0.0144511		1037.83	1132.07	1326.41	1311.56	1405.13	1474.87	1540.62	1602.03	1660.09	1716.36	1772.12	0.0107584		6416.54	7021.52	8309.62	8059.6	8573.44	9039.57	9455.89
32	'OM'	Oman		14183	16052.2	25759	24917.1	31924.3	39569.1	47874.3	56717.1	66647.2	78530.8	92922.8	0.03831		2695.88	3430.61	6588.43	6567.39	8596.68	10824.7	13260.2	15876.5	18844.1	22444.1	26902	0.0470844		308.674	317.574	373.697	355.29	447.015	543.652	643.222	742.503	846.429	962.116	1090.27	0.0255592		708.779	679.793	859.49	817.025	1031.4	1267.45	1526.05
33	'SA'	Saudi Arabia		107555	148077	232234	616622	688195	738824	777932	811105	849122	900244	966117	0.0448837		20443.9	31646.4	59399	162522	185320	202115	215471	227048	240085	257290	279700	0.0537136		2340.79	2929.53	3369.12	8792.33	9636.35	10150.9	10452	10618.5	10784	11029.3	11335.6	0.0320521		5374.94	6270.89	7748.87	20218.8	22233.9	23665.5	24797.5
34	'TN'	Tunisia		38485.3	40216.6	45605.1	41059.1	43885.4	45835.4	47558.1	49053.6	50372.1	51574.8	52705.6	0.00630872		9672.42	11041.9	12216.1	11367.5	12388.3	13100.6	13722.3	14255	14717.8	15133.4	15517.3	0.00949835		597.975	616.581	713.304	637.916	679.494	708.889	734.716	757.017	776.564	794.279	810.811	0.00610831		3697.07	3824.25	4468.68	3920.02	4148.35	4344.83	4508.36
35	'AE'	United Arab Emirates		46518.1	65465.7	89343.1	85604.1	101997	117963	133681	150006	168490	190547	216640	0.0312461		8842.04	13991	22851.5	22562.6	27466.2	32270.3	37027	41990.2	47639.6	54458.3	62719.2	0.0399608		1012.4	1295.16	1296.14	1220.62	1428.2	1620.73	1796.09	1963.77	2139.84	2334.48	2541.86	0.018582		2324.68	2772.39	2981.08	2806.93	3295.29	3778.5	4261.24
36	'YE'	Yemen		10014.6	13339.9	19284.8	14445.5	18531.2	24369.5	33771.1	49695.9	77726.2	126927	208839	0.0626337		1903.55	2850.94	4932.51	3807.39	4990.14	6666.59	9353.92	13911.1	21976.7	36275.8	60460.8	0.0716136		217.953	263.914	279.773	205.977	259.48	334.819	453.737	650.586	987.134	1555.04	2450.33	0.0495841		500.466	564.929	643.468	473.664	598.698	780.585	1076.49
37	'SY'	Syria		9925.14	11928.7	17428.7	15991.9	25904.6	44758.6	70532.9	103533	148476	208649	286748	0.069585		1886.55	2549.36	4457.78	4214.97	6975.68	12244.3	19536.2	28981.4	41980.9	59631.8	83016.3	0.0786236		216.006	235.996	252.846	228.027	362.725	614.952	947.657	1355.39	1885.67	2556.25	3364.45	0.05645		495.996	505.168	581.537	524.369	836.916	1433.68	2248.32
38	'RU-NW'	Russia North-West		64848.8	70448.9	83573.2	105216	129399	153939	181274	209626	236820	260577	278736	0.0295936		19618.2	20436.4	21201	22019.3	22955	23943.4	25110	26428.9	27857.4	29341.6	30812.7	0.00907028		22856	21900.1	19242.7	24226	29794	35444.4	41738.1	48266.1	54527.5	59997.6	64178.8	0.0208638		126255	175718	178206	185084	192949	201257	211063
39	'RU-C'	Russia Center		182899	198694	235710	296752	364957	434170	511264	591228	667926	734930	786148	0.0295936		55331.1	57638.9	59795.2	62103.2	64742.2	67529.9	70820.3	74540.2	78569	82755	86904.1	0.00907028		64463.2	61767.1	54272	68326.9	84031	99967.3	117718	136130	153789	169217	181010	0.0208638		356090	495596	502611	522011	544193	567625	595282
40	'RU-S'	Russia South		110919	120498	142946	179965	221328	263302	310055	358550	405063	445698	476759	0.0295936		33555.5	34955	36262.8	37662.4	39262.8	40953.4	42948.9	45204.8	47648.1	50186.7	52702.9	0.00907028		39093.6	37458.6	32913.2	41436.8	50960.5	60625.1	71390	82555.8	93265.5	102622	109773	0.0208638		215950	300554	304808	316573	330025	344235	361008
41	'RU-V'	Russia Volga region		141133	153321	181884	228987	281617	335025	394514	456218	515402	567105	606627	0.0295936		42695.9	44476.7	46140.7	47921.6	49958	52109.1	54648.1	57518.5	60627.4	63857.4	67059.1	0.00907029		49742.6	47662.2	41878.7	52724.1	64842.1	77139.2	90836.5	105044	118671	130575	139675	0.0208638		274775	382424	387837	402807	419923	438004	459346
42	'RU-U'	Russia Urals		57655.5	62634.4	74302.9	93545.2	115045	136863	161166	186373	210550	231672	247818	0.0295936		17442	18169.5	18849.3	19576.8	20408.7	21287.5	22324.7	23497.3	24767.3	26086.9	27394.8	0.00907029		20320.7	19470.9	17108.2	21538.7	26489.1	31512.7	37108.3	42912.2	48479.1	53342.4	57059.9	0.0208638		112250	156227	158438	164554	171546	178932	187651
43	'RU-SI'	Russia Siberia		91286	99169.2	117644	148110	182152	216696	255174	295085	333365	366807	392370	0.0295936		27616	28767.8	29844.1	30996	32313.1	33704.5	35346.8	37203.4	39214.2	41303.4	43374.2	0.00907028		32173.9	30828.2	27087.4	34102.3	41940.3	49894.2	58753.7	67943	76757.1	84457.1	90343	0.0208638		177726	247354	250855	260538	271609	283304	297108
44	'RU-FE'	Russia Far East		29649.3	32209.7	38210.2	48105.5	59162	70382	82879.4	95842.2	108275	119137	127440	0.0295936		8969.55	9343.66	9693.22	10067.4	10495.2	10947.1	11480.5	12083.5	12736.6	13415.2	14087.7	0.00907027		10449.9	10012.9	8797.87	11076.3	13622	16205.4	19082.9	22067.6	24930.3	27431.3	29343	0.0208638		57724.7	80339.5	81476.7	84621.5	88217.3	92015.9	96499.4
45	'BY'	Belarus		41045.8	52512.8	72569.5	86542.5	102547	117456	132401	147088	161846	177066	192631	0.0314048		11244.9	16748.8	22842.1	25569.3	28676	31511.4	34260.4	36997.4	39953.1	43361.8	47340.8	0.0291664		6587.71	8755.19	12158.5	13847.5	15686.3	17237.1	18544.4	19550	20279.7	20742.8	20872.5	0.0233326		9962.02	13837	19662.7	22010.4	24684.6	27125.4	29491.7
46	'CAU'	Armenia, Azerbaijan, Georgia		34284.8	53221.3	92343.1	114015	146248	181060	220154	262067	304981	347327	387788	0.0497113		9392.67	16974.8	29066.1	33686.2	40896.2	48575	56967.5	65918.2	75287.1	85057.2	95302.5	0.0474331		5502.59	8873.32	15471.4	18243.3	22371	26571	30835.3	34832.2	38214.9	40688.5	42018.8	0.0414958		8321.1	14023.7	25020.4	28997.5	35203.9	41813.9	49038.3
47	'KZ'	Kazakhstan		70770.6	124711	164119	190098	197799	198082	197628	199367	205955	219323	241012	0.0248109		11013.4	17422.9	19780.3	24969.7	27766.7	29096.8	30284.8	31721.4	33816.3	36905.3	41267.7	0.0267715		5713.35	8669.73	10959.9	12452.1	13357.2	14118.9	14918.5	15774.5	16716.2	17772.2	18963.2	0.024284		18457.8	29776.1	37349.4	41399.5	43570.7	45437.7	47340.9
48	'PAM'	Tajikistan, Kyrgyzstan		8586.39	12310.3	16089.7	19185.3	25668.2	36484	54374	80182.5	112414	148876	189089	0.063793		1336.22	1719.84	1939.19	2520.01	3603.26	5359.23	8332.35	12757.9	18457.6	25051.2	32377	0.0658281		693.184	855.8	1074.48	1256.7	1472.84	1782.15	2329.44	3215.84	4477.24	6060.93	7877.67	0.0498107		2239.43	2939.24	3661.62	4178.16	4696.61	5454.78	6757.37
49	'UZ'	Uzbekistan		29540.1	40581.5	59596.5	74701.1	96677.9	123426	156842	196520	241665	291657	346929	0.0505013		4597.04	5669.5	7182.81	9812.11	13571.5	18130.3	24034.7	31268.3	39679.7	49076.8	59403.4	0.052511		2384.79	2821.17	3979.88	4893.19	5663.32	6555.19	7803.42	9466.85	11548.4	13972.3	16601.5	0.0395706		7704.38	9689.3	13562.7	16268.4	18115.7	20301.8	23272.7
50	'TM'	Turkmenistan		11741.7	15958.9	25964.6	34737.9	36205.4	36721.6	37430.7	38788.9	41273.8	45320.8	51328.5	0.0299415		1827.25	2229.56	3129.36	4562.87	5082.46	5394.13	5735.93	6171.72	6776.86	7626.07	8788.79	0.0319119		947.915	1109.44	1733.93	2275.45	2442.17	2590.66	2756.56	2945.12	3164.23	3423.1	3729.56	0.0277743		3062.37	3810.36	5908.9	7565.21	7965.13	8329.09	8723.93
51	'JP-E'	Japan East		517624	506117	452328	450879	446918	440567	432593	423632	414234	404944	396144	-0.00533514		157535	168555	168183	167461	165487	162322	158347	153882	149198	144567	140182	-0.00233142		193496	196921	198223	197588	195852	193069	189574	185648	181529	177458	173602	-0.0021675		11132	11525.1	10763.7	10717.5	10591.1	10388.6	10134.2
52	'JP-W'	Japan West		510878	499521	446433	445003	441093	434825	426954	418111	408835	399666	390981	-0.00533514		155482	166358	165991	165279	163330	160206	156284	151876	147253	142683	138355	-0.00233142		190974	194354	195639	195013	193299	190553	187103	183228	179163	175145	171339	-0.0021675		10986.9	11374.9	10623.4	10577.8	10453.1	10253.2	10002.1
53	'KR'	South Korea (Republic of Korea)		435566	634016	688804	822973	923537	976723	1.03382e+06	1.0935e+06	1.15313e+06	1.20901e+06	1.25728e+06	0.0214276		56100	56756.5	68832.8	111740	146176	166160	188368	212790	239055	266357	293590	0.0336549		48934.5	54383.6	59083.1	66350.6	71077.5	73345.2	75336.2	76782.3	77357.9	76772	74848	0.00853574		10800	15490.9	8761.97	14223.8	18607.3	21151	23978.1
54	'KP'	North Korea (DPR of Korea)		5155.3	6755.53	7156.41	8400.24	10514.3	14200.8	21070.6	33356.8	53975.5	85662.7	129894	0.0666617		802.271	943.792	862.519	1103.38	1475.98	2085.99	3228.89	5307.41	8862.39	14414.4	22241.3	0.0687024		416.191	469.636	477.908	550.245	629.034	741.213	952.151	1354.36	2094.25	3344.39	5224.16	0.0519001		1344.56	1612.96	1628.62	1829.4	2018.4	2293.36	2795.41
55	'CN-NE'	China North-East		379772	520617	717377	897473	1.1401e+06	1.33866e+06	1.58874e+06	1.88867e+06	2.22613e+06	2.57282e+06	2.8848e+06	0.0413863		52223.6	81399.5	142398	172036	206714	233735	267353	307912	354713	405151	454186	0.0442088		28993.6	42637.7	58753.1	68864.7	82023.6	92074.1	103572	115457	125848	132074	131336	0.0306748		110458	159108	223644	249791	288484	322157	366589
56	'CN-N'	China North		903708	1.23886e+06	1.70707e+06	2.13563e+06	2.71299e+06	3.18548e+06	3.78058e+06	4.49429e+06	5.29731e+06	6.1223e+06	6.86469e+06	0.0413863		124272	193699	338851	409377	491896	556197	636195	732709	844078	964098	1.08078e+06	0.0442088		68993.3	101461	139809	163871	195184	219100	246462	274743	299469	314283	312528	0.0306748		262846	378614	532185	594403	686477	766607	872337
57	'CN-E'	China East		875566	1.20028e+06	1.65392e+06	2.06913e+06	2.62851e+06	3.08628e+06	3.66286e+06	4.35434e+06	5.13235e+06	5.93165e+06	6.65092e+06	0.0413863		120402	187667	328299	396629	476579	538877	616384	709892	817793	934076	1.04713e+06	0.0442088		66844.9	98301.3	135455	158768	189106	212277	238787	266187	290144	304496	302796	0.0306748		254661	366823	515613	575893	665100	742735	845173
58	'CN-C'	China Central		1.2857e+06	1.76252e+06	2.42864e+06	3.03835e+06	3.85975e+06	4.53196e+06	5.37861e+06	6.394e+06	7.53644e+06	8.71015e+06	9.76635e+06	0.0413863		176800	275573	482081	582417	699818	791298	905111	1.04242e+06	1.20086e+06	1.37162e+06	1.53762e+06	0.0442088		98156.3	144348	198905	233138	277686	311712	350639	390874	426053	447128	444632	0.0306748		373950	538651	757136	845653	976646	1.09065e+06	1.24107e+06
59	'CN-S'	China South		855713	1.17307e+06	1.61641e+06	2.02221e+06	2.56891e+06	3.0163e+06	3.5798e+06	4.25561e+06	5.01597e+06	5.79715e+06	6.50011e+06	0.0413863		117672	183411	320855	387635	465772	526658	602408	693795	799250	912896	1.02338e+06	0.0442088		65329.1	96072.3	132384	155168	184818	207464	233372	260151	283565	297592	295930	0.0306748		248887	358506	503921	562835	650019	725894	826008
60	'CN-TB'	China Tibet		259050	355123	489337	612184	777685	913125	1.08371e+06	1.2883e+06	1.51848e+06	1.75497e+06	1.96778e+06	0.0413863		35622.7	55524.1	97132.4	117349	141003	159435	182367	210033	241957	276361	309809	0.0442088		19777.1	29084	40076.6	46973.9	55949.8	62805.5	70648.8	78755.6	85843.5	90089.9	89587	0.0306748		75345.5	108530	152552	170387	196780	219750	250057
61	'CN-NW'	China (North-West)		10410.2	14271	19664.6	24601.3	31252.3	36695	43550.4	51771.9	61022.2	70525.9	79077.6	0.0413863		1431.54	2231.3	3903.38	4715.8	5666.4	6407.1	7328.64	8440.43	9723.33	11105.9	12450.1	0.0442088		794.766	1168.77	1610.53	1887.7	2248.42	2523.92	2839.11	3164.89	3449.73	3620.38	3600.16	0.0306748		3027.85	4361.43	6130.49	6847.21	7907.87	8830.91	10048.9
62	'CN-XU'	China Uyghur region		75639.5	103692	142880	178750	227075	266621	316431	376168	443380	512431	574568	0.0413863		10401.4	16212.4	28361.5	34264.4	41171.3	46553.2	53248.9	61327	70648.5	80694.1	90460.6	0.0442088		5774.67	8492.17	11701.9	13715.8	16336.7	18338.5	20628.6	22995.7	25065.3	26305.2	26158.3	0.0306748		22000	31689.6	44543.4	49751	57457.5	64164.3	73013.8
63	'MN'	Mongolia		5440.54	7894.55	10734.4	14310.4	16867.7	19129.9	21486.8	24115.7	27283.2	31314.7	36584.9	0.0388508		846.66	1102.92	1293.75	1879.7	2367.85	2810.04	3292.67	3837.06	4479.7	5269.29	6264.29	0.0408383		439.218	548.819	716.847	937.383	1048.77	1157.42	1288.08	1443.84	1628.48	1846.45	2102.46	0.0318129		1418.95	1884.92	2442.88	3116.52	3383.71	3650.03	3961
64	'NZ'	New Zealand		52594.6	67937.9	71375.5	70283.4	66829.5	61789.6	57589.8	54760.4	53730.9	54839.8	58393	0.00209383		8184.79	9491.36	8602.47	9231.84	9381.41	9076.43	8825.15	8712.95	8822.23	9227.83	9998.41	0.00401098		4245.99	4722.95	4766.49	4603.81	4800.66	4957.73	5116.85	5280.55	5454.51	5647.85	5871.65	0.00650429		13717.3	16220.9	16243.3	15306.3	15778.5	16163.5	16542.2
65	'AU-E'	Australia East		227128	247736	251113	305938	348354	371494	397585	426662	458544	493004	529812	0.0170845		122806	152444	163794	173473	181250	185649	190649	196291	202576	209503	217080	0.0114583		9376.52	10227.3	10366.7	12082.6	13381.5	14168.3	14996	15854.1	16730.1	17608	18463	0.0136434		120615	166543	199144	210912	220368	225715	231795
66	'AU-W'	Australia West		30671.6	33454.6	33910.6	41314.3	47042.2	50167	53690.5	57617	61922.4	66575.9	71546.4	0.0170845		16583.9	20586.2	22119	23426	24476.3	25070.2	25745.5	26507.4	27356.2	28291.5	29314.7	0.0114583		1266.22	1381.11	1399.93	1631.65	1807.05	1913.31	2025.08	2140.96	2259.25	2377.81	2493.26	0.0136434		16288	22490.2	26892.7	28481.8	29758.7	30480.9	31301.9
67	'ID-PG+NG'	Indonesia-Papua and Papua New Guinea		26372.4	35216.1	46247.7	51875.8	59884.8	67807.9	77429.4	89546.1	103126	120305	142289	0.0342855		4104.08	4919.92	5573.97	6813.96	8406.51	9960.47	11865.4	14247.7	16932.6	20243.5	24363.7	0.0362643		2129.06	2448.18	3088.45	3398.05	3866.25	4362.6	4978	5740.91	6550.39	7494.12	8581.52	0.0282709		6878.21	8408.25	10524.8	11297.5	12538	13872.6	15475.6
68	'ID-SU'	Indonesia Sumatra		125228	167222	219605	246329	276961	304163	335973	375508	423220	485359	566728	0.0306554		19488	23361.9	26467.6	32355.7	38879.3	44679.2	51485.1	59747.2	69489.8	81670.8	97038.8	0.0326272		10109.7	11625	14665.3	16135.4	17881	19569.1	21600	24074.3	26882.2	30234.3	34179.6	0.0246618		32660.8	39926.1	49976.6	53645.5	57987.1	62227.7	67150.1
69	'ID-JV+TL'	Indonesia Java and Timor Leste		363490	485382	637431	715002	787945	851654	927761	1.02255e+06	1.15292e+06	1.3227e+06	1.54497e+06	0.029363		56566.5	67811.1	76825.8	93916.7	110610	125102	142172	162698	189301	222570	264540	0.0313323		29344.8	33743.2	42568	46835.2	50870.9	54793.5	59646.6	65556.9	73231.5	82394.8	93177.8	0.023377		94802.2	115891	145064	155713	164972	174237	185429
70	'ID-KL-SW'	Indonesia East		83637.4	111684	146670	164519	185837	205356	228376	256998	289653	332180	387870	0.0311592		13015.7	15603	17677.3	21609.8	26087.5	30165.2	34996.6	40891.1	47558.9	55895.6	66413.5	0.0331319		6752.1	7764.15	9794.7	10776.6	11997.9	13212.1	14682.5	16476.5	18398.2	20692.4	23392.5	0.0251627		21813.6	26665.9	33378.5	35828.9	38908.6	42013.1	45644.8
71	'MY-W+SG'	Malaysia West and Singapore		149969	200376	247795	271238	287687	296707	305302	314860	327989	347973	378528	0.0186898		4104.08	4919.92	5573.97	6813.96	8406.51	9960.47	11865.4	14247.7	16932.6	20243.5	24363.7	0.0362643		12107.1	13929.9	16547.9	17767.1	19183.4	20450.5	21843.8	23329.2	24881.9	26501.5	28221.9	0.0170702		39113.6	47842	56392.1	59070.2	62474.7	65571.2	68875
72	'MY-E+BN'	Malaysia East and Brunei		34381.7	45937.8	56809.2	62183.8	65805.4	68087.2	70332.9	72878	76339.8	81496.3	89236.6	0.0192584		19488	23361.9	26467.6	32355.7	38879.3	44679.2	51485.1	59747.2	69489.8	81670.8	97038.8	0.0326272		2775.65	3193.54	3793.75	4073.26	4388	4692.92	5032.19	5399.81	5791.3	6206.72	6653.2	0.017638		8967.13	10968.2	12928.4	13542.4	14290.4	15047.1	15866.8
73	'PH'	Philippines		160604	213051	269286	304608	347043	398599	472081	573863	711043	891284	1.12424e+06	0.0396857		24993.3	29764.6	32455.4	40010.8	48717.3	58551.2	72342.4	91307.5	116748	149975	192500	0.0416748		12965.7	14811	17983	19952.9	22061.5	24394.8	27659.6	32213	38451	46727.8	57296.2	0.0301646		41887.3	50868.3	61282.8	66337.5	71395.3	77114.7	84885.2
74	'MM'	Myanmar		22848.3	25394.6	35177.4	64798.8	96574.7	133355	182429	247322	327568	420233	523772	0.0646473		3555.66	3547.8	4239.72	8511.42	13557	19588.8	27955.7	39351.5	53784.3	70712.2	89683.5	0.0666841		1844.56	1765.4	2349.16	4244.55	5190.61	6277.98	7915.28	10331.7	13650.4	17796.1	22529.8	0.0513258		5959.09	6063.26	8005.5	14111.9	16381.2	19046.5	22943.4
75	'TH'	Thailand		282041	389660	465067	477107	519016	562163	610403	654407	689975	720392	753546	0.0198492		43891.3	54438.1	56051.8	62668.8	72858.5	82577.5	93539.1	104123	113289	121220	129027	0.0218003		22769.3	27088.7	31057.4	31252.2	34017.7	36844.4	40216	43852.5	47359.7	50401.2	52806.3	0.0169667		73559.4	93035.8	105838	103904	110538	117466	125491
76	'LA'	Laos		6112.28	8768.51	12806.9	16026.3	20235.4	24992.8	30852.2	38123.6	47268.1	58851.6	73574.9	0.0510189		951.196	1225.02	1543.54	2105.08	2840.61	3671.25	4727.84	6065.87	7761.09	9902.9	12598	0.0530297		493.448	609.575	855.251	1049.78	1203.94	1374.19	1606.76	1920.26	2335.6	2872.06	3543.83	0.0402186		1594.15	2093.58	2914.54	3490.2	3859.99	4277.3	4830.84
77	'VN'	Vietnam		103708	151632	203487	237803	314795	406043	514342	635619	767657	911676	1.07317e+06	0.0478452		16139	21184	24525.1	31235.7	44190.3	59644.7	78818.6	101134	126044	153407	183754	0.0498499		8372.37	10541.3	13589	15576.9	18182.3	21167.5	25237.5	30465.3	36780.8	43969.9	51742.1	0.0370983		27048.1	36203.9	46308.6	51788.6	58038.3	65355.2	75042.4
78	'KH'	Cambodia		8151.54	13503.8	18531.6	21696.2	24098.5	26847.3	31145.3	37993.4	48761.4	65223.4	89655.5	0.0491238		1268.55	1886.56	2233.51	2849.82	3382.9	3943.67	4772.75	6045.14	8006.28	10975.1	15351.4	0.0511309		658.078	938.764	1237.55	1421.17	1557.8	1703.6	1909	2212.82	2676.12	3385.38	4450.88	0.0389709		2126.01	3224.18	4217.34	4724.99	5052.7	5410.07	5898.95
79	'IN-E'	India East		218681	287029	400543	632830	889743	1.09989e+06	1.3226e+06	1.4813e+06	1.72615e+06	2.09958e+06	2.64866e+06	0.051149		39917.7	61634.2	104365	179991	274038	363490	465342	575218	720675	873963	1.02701e+06	0.0671075		48058.9	59248	85907.1	132773	182141	219619	255945	275628	305761	349456	407098	0.0436587		34985.4	50326.2	74067.1	109939	144210	167720	186736
80	'IN-CE'	India Central-East		223365	293177	409122	646385	908801	1.12345e+06	1.35093e+06	1.51303e+06	1.76312e+06	2.14455e+06	2.70539e+06	0.051149		40772.7	62954.4	106600	183846	279908	371276	475309	587538	736111	892683	1.04901e+06	0.0671075		49088.3	60517	87747.2	135617	186043	224323	261427	281532	312310	356941	415818	0.0436587		35734.7	51404.2	75653.6	112293	147299	171312	190735
81	'IN-W'	India West		218133	286309	399539	631243	887512	1.09713e+06	1.31929e+06	1.47758e+06	1.72182e+06	2.09431e+06	2.64202e+06	0.051149		39817.6	61479.6	104103	179539	273351	362578	464175	573775	718868	871771	1.02443e+06	0.0671075		47938.4	59099.4	85691.6	132440	181684	219068	255303	274937	304994	348579	406077	0.0436587		34897.6	50200	73881.4	109663	143848	167299	186267
82	'IN-CW'	India Central-West		227611	298750	416900	658672	926077	1.14481e+06	1.37661e+06	1.54179e+06	1.79664e+06	2.18532e+06	2.75682e+06	0.051149		41547.8	64151.1	108627	187341	285229	378334	484345	598708	750105	909653	1.06895e+06	0.0671075		50021.4	61667.5	89415.2	138195	189579	228588	266397	286884	318247	363726	423722	0.0436587		36414	52381.3	77091.8	114428	150099	174569	194361
83	'IN-N'	India North		48213.7	63282.6	88309.7	139523	196166	242498	291601	326589	380573	462904	583963	0.051149		8800.85	13588.8	23009.8	39683.4	60418.6	80140.4	102596	126821	158891	192687	226430	0.0671075		10595.8	13062.7	18940.4	29273.1	40157.5	48420.5	56429.5	60769	67412.5	77046.1	89754.8	0.0436587		7713.39	11095.7	16329.9	24238.7	31794.7	36978	41170.5
84	'IN-NW'	India North-West		227800	298997	417245	659218	926844	1.14575e+06	1.37775e+06	1.54307e+06	1.79813e+06	2.18712e+06	2.7591e+06	0.051149		41582.2	64204.2	108717	187496	285465	378647	484746	599203	750726	910406	1.06983e+06	0.0671075		50062.8	61718.5	89489.3	138309	189736	228777	266618	287121	318510	364027	424073	0.0436587		36444.2	52424.7	77155.6	114523	150223	174714	194522
85	'IN-UP'	India Uttar Pradesh		325943	427815	597008	943230	1.32616e+06	1.63938e+06	1.97133e+06	2.20787e+06	2.57282e+06	3.12941e+06	3.94782e+06	0.051149		59497.2	91865.5	155555	268275	408453	541780	693590	857359	1.07416e+06	1.30264e+06	1.53075e+06	0.0671075		71631.5	88308.8	128044	197898	271481	327341	381485	410822	455735	520862	606777	0.0436587		52145.5	75011	110397	163863	214944	249986	278329
86	'IN-S'	India South		174372	228870	319384	504604	709462	877028	1.05461e+06	1.18115e+06	1.37639e+06	1.67416e+06	2.11198e+06	0.051149		31829.5	49145.7	83218.2	143521	218512	289839	371053	458666	574650	696879	818914	0.0671075		38321.1	47243	68500.4	105870	145235	175119	204085	219780	243807	278648	324611	0.0436587		27896.5	40129	59059.5	87662.6	114990	133736	148899
87	'IN-CS'	India South-Central		238105	312523	436120	689039	968772	1.19758e+06	1.44008e+06	1.61287e+06	1.87947e+06	2.28606e+06	2.88392e+06	0.051149		43463.3	67108.7	113635	195978	298379	395776	506675	626309	784686	951590	1.11823e+06	0.0671075		52327.6	64510.5	93537.5	144566	198319	239126	278679	300110	332919	380495	443257	0.0436587		38092.8	54796.3	80645.9	119704	157019	182617	203322
88	'IN-NE'	India North-East		73458.9	96418.1	134549	212579	298880	369473	444285	497594	579845	705285	889731	0.051149		13409.1	20704	35058	60462.1	92054.3	122103	156317	193226	242087	293580	344990	0.0671075		16143.8	19902.4	28857.7	44600.8	61184.4	73774	85976.5	92588.3	102710	117388	136751	0.0436587		11752.2	16905.5	24880.5	36930.3	48442.7	56340.1	62727.8
89	'BD'	Bangladesh		105324	143039	190789	220186	255772	297028	354392	435156	549127	708708	928795	0.0444985		16390.6	19983.5	22994.6	28921.7	35904.9	43631.3	54307.6	69237.8	90162.8	119253	159034	0.0464968		8502.91	9943.88	12740.9	14422.9	16054.5	17837.9	20328.8	23858.9	28886	35982	45764.2	0.0342348		27469.8	34152.2	43418.8	47952	51865.8	56237	62165.5
90	'NP+BT'	Nepal and Bhutan		18809.4	23850.5	29947.7	32027.3	36134	41889.8	51400.3	66670.5	90445.3	126038	176653	0.0458151		2927.13	3332.07	3609.42	4206.84	5072.43	6153.29	7876.66	10608	14850.5	21208.3	30247.6	0.0478159		1518.49	1658.06	1999.92	2097.9	2311.84	2562.36	2945.26	3548.66	4507.23	5997.5	8191.05	0.034281		4905.7	5694.58	6815.37	6974.91	7488.08	8102.14	9013.47
91	'PK-S'	Pakistan South		64303.1	86965.8	102187	106381	117952	133043	158175	199118	263160	358359	492498	0.041558		10006.9	12149.7	12316	13973.4	16557.9	19543.1	24239	31681.8	43209.1	60300.7	84328.5	0.0435506		5191.23	6045.75	6824.08	6968.35	7633.67	8379.27	9482.44	11183.9	13839	17886.2	23736.5	0.0308677		16771	20764.1	23255.2	23167.7	24763.6	26591.2	29216.8
92	'PK-N'	Pakistan North		171708	232224	272868	284069	314965	355264	422373	531703	702714	956922	1.31511e+06	0.041558		26721.3	32443.2	32887.2	37312.9	44214.2	52185.7	64725	84599.5	115381	161020	225181	0.0435506		13862.1	16143.9	18222.3	18607.5	20384.1	22375.1	25320.9	29864.1	36954	47761.3	63383.4	0.0308677		44783.3	55446.1	62098.1	61864.4	66126	71006.1	78017.3
93	'AF'	Afghanistan		11212.1	14718.4	23868.2	26594.8	29994.1	34893.3	44275	62168.4	95261.7	152998	245092	0.0636356		1744.83	2056.26	2876.7	3493.27	4210.52	5125.57	6784.77	9891.63	15641.3	25744.7	41966.2	0.0656704		905.159	1023.21	1593.93	1742.06	1919.47	2129.79	2481.22	3122.77	4342.57	6611.48	10486.9	0.0502155		2924.24	3514.19	5431.82	5791.82	6217.38	6732.91	7569.35
94	'LK'	Sri Lanka		49897.2	64947.7	86506.2	100941	112543	121271	130010	139674	151351	166072	185017	0.0265562		7765.03	9073.62	10426.1	13258.8	15798.6	17813.8	19922.9	22223.6	24850.8	27944.8	31679.9	0.0285202		4028.23	4515.08	5776.92	6611.99	7256.93	7857.58	8547.82	9329.84	10200.3	11145.5	12147	0.0223206		13013.7	15507	19686.7	21982.9	23529.9	25002.2	26645
95	'WW'	Senegal, Gambia, Cape Verde Islands, Guinea Bissau, Guinea, Sierra Leone, Liberia, Mali, Mauritania, Western Sahara		24641.6	26921.2	30179.9	30958.1	33913.6	36482.5	39610.7	43590.2	48851.3	55996.7	65759.9	0.0198255		6193.1	7391.52	8084.18	8570.97	9638.43	10576.9	11705.8	13123	14970.1	17439	20753.2	0.0244802		382.874	412.742	472.039	480.982	524.46	563.185	610.084	669.423	747.421	852.668	995.402	0.0192926		2367.18	2559.97	2957.21	2955.65	3194.42	3453.26	3750.21
96	'WS'	Ghana, Cote D'Ivoire, Benin, Burkina Faso (Upper Volta), Togo		61522.5	64131.4	71675.7	82632.7	91410.9	99190.7	108479	119459	132315	147446	165601	0.0200009		15462.3	17608	19199.5	22877.5	26047.9	28889.9	32242	36152.5	40665.8	45893.8	52056.8	0.0245758		955.92	983.231	1121.07	1283.83	1412.96	1530.24	1669.5	1833.22	2023.81	2246.68	2512.1	0.0195119		5910.13	6098.34	7023.24	7889.17	8598.32	9382.23	10264
97	'WN'	Niger, Chad		8674.52	12751.2	14739.8	20307.8	23385	26321.3	30126.1	35130.7	41822.7	50851.2	62973.2	0.0404428		2180.14	3500.99	3948.29	5622.36	6733.77	7806.42	9179.51	10961.9	13311.2	16430.8	20545.8	0.045887		134.782	195.495	230.543	315.513	360.782	405.045	462.089	536.713	635.924	768.908	946.126	0.0397438		833.313	1212.53	1444.29	1938.84	2187.44	2483.3	2844.48
98	'NIG-S'	Nigeria South		87179.3	125486	161225	176100	197949	217076	238577	261889	286534	312288	339236	0.0275472		21910.5	34453.7	43186.7	48754.5	56593.2	63533.8	71255.1	79527.7	88156.7	97038.2	106174	0.0320657		1354.57	1923.89	2521.69	2735.98	3057.92	3346.48	3669.06	4016.91	4382.53	4762.12	5156.36	0.0270956		8374.83	11932.7	15797.8	16812.7	18587	20510.3	22551
99	'NIG-N'	Nigeria North		92362.5	132947	170810	186570	208278	227079	248328	271430	295887	321483	348310	0.026903		23213.2	36502.2	45754.4	51653.2	59546.2	66461.5	74167.5	82425	91034.4	99895.5	109014	0.0314186		1435.1	2038.28	2671.62	2898.65	3217.48	3500.69	3819.02	4163.25	4525.59	4902.34	5294.28	0.0264516		8872.75	12642.1	16737.1	17812.3	19556.9	21455.4	23472.7
100	'SER'	Sudan, Eritrea		10634.1	12486	15778.6	19204.6	21476.5	23537.6	26119.9	29288.4	32866.1	36611.2	40466.2	0.0270883		2672.65	3428.19	4226.55	5316.92	6137.5	6890.41	7822.34	8950.76	10206.8	11500.8	12809.4	0.0318386		165.23	191.43	246.79	298.372	331.795	362.865	401.581	448.825	501.867	557.03	613.387	0.0265802		1021.56	1187.31	1546.08	1833.51	2017.06	2224.73	2469.86
101	'ETH'	Ethiopia		21194.1	25190.4	38288.3	49564.4	57703.1	65719.8	76008.5	88780.2	104205	122418	143445	0.0389853		5326.66	6916.33	10256.2	13722.3	16661.7	19590.3	23303.3	27851.9	33267	39560.2	46698.1	0.044376		329.308	386.207	598.863	770.059	889.786	1010.64	1164.89	1355.33	1584	1852.27	2159.68	0.0383308		2036	2395.39	3751.73	4732.05	5389.54	6197.32	7173.99
102	'SOMDJ'	Djibouti, Somalia		2648.72	2649.76	3215.82	4025.13	4809.83	5683.31	6870.46	8384.34	10260.2	12577	15458.3	0.0359111		665.697	727.523	861.411	1114.39	1397.8	1716.89	2145.31	2684.47	3343.03	4143.53	5121.64	0.041652		41.1552	40.6249	50.2982	62.5365	74.0802	87.2478	105.046	127.62	155.43	189.554	231.678	0.0351641		254.448	251.97	315.106	384.29	447.683	535.696	648.388
103	'KENUG'	Kenya, Uganda		47575.1	51614	62558.4	204259	219777	232575	247506	265775	288309	314881	344203	0.0403721		11956.9	14171.2	16757.3	56550.6	62155.3	66830.4	72218.9	78725.4	86636.3	95817.6	105771	0.0445638		739.208	791.32	978.467	3173.48	3401.76	3594.68	3818.54	4090.96	4425.03	4816.41	5245.09	0.0399674		4570.27	4908.04	6129.87	19501.2	20754.8	22044.3	23461.7
104	'TZRB'	Rwanda, Burundi, Tanzania		31879.9	38679.1	47463.4	52640.3	58943.9	65181.6	73678	85009.5	99488.4	117641	140606	0.0301245		8012.28	10619.8	12713.9	14573.8	16850.5	19129.2	22195.4	26231.1	31314.2	37586.5	45382.1	0.0352913		495.341	593.01	742.369	817.847	910.579	1004.61	1131.99	1300.96	1515.61	1782.99	2118.72	0.029493		3062.52	3678.05	4650.77	5025.71	5534.95	6163.48	6970.01
105	'CAR'	Central African Republic, Cameroon, Equatorial Guinea, Sao Tome and Principe, Congo, Republic of, Gabon		43230.7	50657.5	53840.7	50979.2	54530.4	57264.3	60263.2	63811.3	68314.3	74270	82156	0.0129242		10865.1	13908.6	14422.1	14114	15396.5	16395.3	17477.5	18741.2	20322.1	22379.9	25056.9	0.0168523		671.708	776.656	842.115	792.04	844.281	885.494	930.456	983.361	1050.12	1137.84	1253.13	0.0125497		4152.94	4817.09	5275.65	4867.12	5154.01	5429.48	5714.16
106	'COG'	Congo, Democratic Republic		12835.7	13462.6	15986.1	34357.6	40491.9	46680.1	54863.7	65464.2	79014.2	96202.5	117801	0.0453329		3225.96	3696.32	4282.13	9512.14	11727.7	13988.3	16941.6	20716.9	25474	31413	38744.9	0.0509719		199.438	206.402	250.036	533.797	624.038	717.324	840.018	998.082	1198.97	1452.14	1767.9	0.0446072		1233.05	1280.18	1566.42	3280.21	3775.78	4399.31	5176.16
107	'SW'	Angola, Namibia, Botswana		69919.9	72838.3	79193.5	82945.8	91591.3	98076.3	104421	110614	116834	123406	130734	0.0125949		17572.8	19998.6	21213.3	22964.2	26086.6	28455.7	30745.3	32951.1	35134.7	37405.3	39893	0.0165322		1086.4	1116.72	1238.66	1288.69	1415.87	1513.63	1608.75	1701.11	1793.32	1890.11	1997.25	0.0122525		6716.82	6926.29	7759.88	7919.07	8617.5	9270.93	9873.19
108	'ZAFLS'	Republic of South Africa, Lesotho		231183	242873	255493	226875	235747	242078	248264	254376	260518	266789	273224	0.00334726		58102.6	66683.6	68438.2	62812.1	66016.3	68329.2	70561.6	72738.4	74894.5	77061.2	79245.8	0.00622619		3592.06	3723.61	3996.14	3524.86	3655.37	3750.81	3843.55	3934.69	4025.74	4118.1	4212.19	0.00319023		22208.5	23095.1	25034.9	21660.4	22377.1	23015.1	23602.3
109	'SE'	Malawi, Mozambique, Zambia, Zimbabwe, Swaziland		40369.5	37214.2	43678.8	48086.2	53824.5	59333.4	66599.8	76246.8	88958.2	105425	126333	0.0230793		10146	10217.6	11700.1	13313	15385.5	17398	20020.3	23456.1	27918.7	33608.2	40706	0.0281756		627.25	570.549	683.174	747.093	831.508	914.553	1023.49	1167.34	1355.79	1598.33	1904.01	0.0224559		3878.07	3538.74	4279.92	4590.92	5054.49	5609.58	6299.35
110	'IOCE'	Comoros Islands, Mauritius, Mayotte, Madagascar, Seychelles		19830.9	19502.1	20983.2	19690	20849	21697.5	22595.1	23654.2	25079.7	27257.1	30850.6	0.00887748		4984.04	5354.54	5620.71	5451.31	5869.93	6179.87	6503.81	6881.02	7381.45	8133.82	9353.66	0.0126701		308.127	298.997	328.196	305.914	322.965	335.755	349.212	365.005	386.138	418.211	470.745	0.00851213		1905.04	1854.49	2056.07	1879.86	1973.49	2058.98	2144.19
111	'CAM'	Panama, Costa Rica, Nicaragua, Honduras, El Salvador, Guatemala and Belize		87686.2	104632	147931	165757	187827	210122	239002	276981	327133	394147	483139	0.0347199		15696.3	17822.7	24916.9	29745.3	35364.5	40955.3	48099.7	57397.6	69610.1	85896.2	107587	0.0392481		724.972	769.429	833.077	916.392	1021.82	1128.63	1265.02	1441.38	1669.41	1966.56	2348.53	0.0237868		6274.13	6736.61	7587.22	8376.79	9416.62	10530.3	11953.1
112	'CO'	Colombia		135667	162998	235945	265020	285028	297618	311849	331237	359554	400030	454909	0.0244931		24285.1	27764.6	39741.8	47558	53665.6	58009.3	62760.2	68640.9	76509	87178.4	101301	0.0289765		1121.66	1198.64	1328.73	1465.17	1550.61	1598.59	1650.59	1723.72	1834.86	1995.91	2211.31	0.013668		9707.23	10494.5	12101.4	13393.2	14289.7	14915.2	15596.4
113	'VE'	Venezuela, Guyana, French Guiana, Suriname		145887	166662	231992	233620	241661	250256	270083	304878	355386	418735	490552	0.0245505		26114.6	28388.7	39075.8	41923.4	45500.4	48778	54354.7	63178.7	75622	91254.8	109238	0.0290341		1206.17	1225.58	1306.47	1291.57	1314.69	1344.2	1429.52	1586.55	1813.59	2089.24	2384.57	0.0137247		10438.5	10730.4	11898.6	11806.3	12115.5	12541.7	13507.5
114	'EC'	Ecuador		37705.2	48059.5	65841.2	77114.7	90121.5	106657	130022	160157	195293	233179	272773	0.0403704		6749.42	8186.32	11090	13838.3	16968.2	20788.8	26167.1	33188.7	41556	50816.6	60741.8	0.0449233		311.739	353.415	370.787	426.33	490.28	572.887	688.194	833.44	996.61	1163.42	1325.94	0.0293775		2697.88	3094.26	3376.93	3897.1	4518.19	5345.16	6502.73
115	'PE'	Peru		68142.4	84504	136771	160773	200011	241945	288299	336507	385897	437701	494309	0.040427		12197.9	14394.2	23037.3	28850.9	37658.4	47158.1	58020.7	69733.1	82114.4	95387.9	110074	0.0449801		563.388	621.415	770.233	888.838	1088.1	1299.56	1525.94	1751.15	1969.3	2183.87	2402.83	0.0294335		4875.73	5440.7	7014.87	8124.91	10027.4	12125.2	14418.6
116	'CSA'	Bolivia and Paraguay		27911.3	31832.5	46620.4	54279.2	62038.8	71015.1	83810.9	101711	125607	156025	193411	0.039475		4996.27	5422.25	7852.56	9740.44	11680.8	13841.7	16867.1	21077.2	26727.7	34002.3	43069.4	0.0440239		230.765	234.086	262.544	300.083	337.505	381.443	443.604	529.294	640.993	778.469	940.169	0.0284916		1997.11	2049.5	2391.11	2743.08	3110.28	3558.94	4191.6
117	'BR-S'	Brazil South		161805	165811	207586	232422	260317	289282	324431	366667	416827	475510	542602	0.0244948		54115.1	72451.6	104035	112986	123818	131713	140906	151603	164032	178411	194827	0.025951		40.3063	41.3041	51.7103	56.5304	61.8568	67.2649	73.5785	80.7963	88.8302	97.4455	106.156	0.0195569		22157.1	31724.9	38205.9	36852.7	34523.2	35519.3	37186.9
118	'BR-SP'	Brazil São Paulo		245558	251638	315036	352728	395061	439019	492362	556460	632582	721642	823461	0.0244948		82125.9	109954	157885	171469	187908	199890	213840	230075	248938	270759	295672	0.025951		61.1694	62.6838	78.4764	85.7915	93.8748	102.082	111.664	122.618	134.81	147.885	161.104	0.0195569		33625.9	48146.2	57981.9	55928.2	52392.9	53904.6	56435.4
119	'BR-SE'	Brazil Southeast		229080	234752	293895	329058	368550	409559	459322	519119	590133	673216	768203	0.0244948		76614.8	102575	147290	159963	175298	186476	199491	214635	232233	252589	275831	0.025951		57.0646	58.4774	73.2102	80.0344	87.5753	95.2321	104.171	114.389	125.764	137.961	150.294	0.0195569		31369.4	44915.4	54091.1	52175.1	48877.1	50287.3	52648.3
120	'BR-N'	Brazil North		180958	185438	232157	259933	291129	323523	362833	410068	466165	531795	606828	0.0244948		60520.5	81027.4	116349	126359	138473	147304	157584	169547	183448	199528	217888	0.025951		45.0771	46.1931	57.8311	63.2217	69.1785	75.2268	82.2876	90.3598	99.3447	108.98	118.722	0.0195569		24779.7	35480.1	42728.2	41214.8	38609.5	39723.5	41588.5
121	'BR-NE'	Brazil Northeast		313317	321073	401965	450058	504072	560160	628222	710007	807134	920768	1.05068e+06	0.0244948		104787	140294	201451	218783	239758	255047	272846	293560	317629	345470	377259	0.025951		78.0482	79.9804	100.131	109.464	119.778	130.25	142.476	156.452	172.009	188.691	205.559	0.0195569		42904.5	61431.5	73981.2	71360.7	66849.9	68778.7	72007.9
122	'AR-NE'	Argentina Northeast, Uruguay		62096.1	65975.4	80568.8	99031.6	114552	129500	144319	157275	168376	179133	191480	0.0227776		11115.5	11238.1	13570.7	17771.3	21568.1	25241.2	29044.5	32591.5	35828.4	39038.3	42639.4	0.0272535		513.398	485.162	453.726	547.498	623.19	695.585	763.869	818.442	859.249	893.765	930.783	0.0119706		4443.1	4247.76	4132.29	5004.71	5743.02	6489.96	7217.77
123	'AR-E'	Argentina East		101918	108285	132237	162540	189535	215851	242211	265692	286246	306381	329386	0.0237386		18243.8	18444.9	22273.5	29167.9	35686	42072	48745.4	55058.4	60909.8	66769.6	73348.6	0.0282187		842.636	796.293	744.696	898.603	1031.11	1159.4	1282	1382.64	1460.76	1528.66	1601.14	0.0129215		7292.42	6971.81	6782.3	8214.18	9502.23	10817.4	12113.6
124	'AR-W'	Argentina West		74265.7	78905.3	96358.6	118440	138111	157287	176495	193605	208582	223255	240017	0.0237386		13293.9	13440.5	16230.3	21254.1	26003.7	30657.1	35519.9	40120.1	44383.9	48653.8	53447.8	0.0282187		614.013	580.245	542.647	654.796	751.352	844.834	934.17	1007.5	1064.43	1113.91	1166.72	0.0129215		5313.86	5080.24	4942.14	5985.53	6924.1	7882.48	8826.95
125	'CL'	Chile		91279.1	112803	155261	171650	181803	183523	182377	181975	185043	193511	208568	0.0166642		16339.4	19214.5	26151.6	30802.8	34230.3	35770.9	36703.8	37710	39375	42171.7	46444.5	0.0211133		754.677	829.517	874.359	948.972	989.05	985.757	965.306	946.978	944.305	965.504	1013.85	0.00592177		6531.21	7262.7	7963.2	8674.6	9114.61	9197.32	9121.15
126	'CA-W'	Canada West		160749	176068	189473	216863	238590	261343	285998	312031	338664	365102	390643	0.0179177		65268.5	87816.1	82501.2	87397.7	90674.3	95158.7	100239	105907	112089	118673	125526	0.013166		499.87	476.671	455.83	501.081	531.593	564.414	595.386	622.036	642.213	654.343	657.346	0.00549227		102776	112221	95494.9	101163	104955	110146	116026
127	'CA-E'	Canada East		343683	376436	405096	463657	523253	573151	627224	684317	742724	800707	856721	0.0184357		139545	187752	176389	186858	198858	208693	219834	232265	245822	260261	275291	0.0136816		1068.73	1019.13	974.57	1071.32	1165.84	1237.82	1305.74	1364.19	1408.44	1435.04	1441.63	0.00600401		219737	239929	204169	216287	230178	241561	254457
128	'US-NENY'	US New England & New York (Connecticut, Maine, Massachusetts, New Hampshire, Rhode Island, Vermont, New York)		744775	801519	687843	764896	841308	915572	991266	1.06669e+06	1.1401e+06	1.20991e+06	1.27512e+06	0.0108122		186974	203432	212428	226612	241248	256088	272054	288996	306716	324978	343546	0.0122413		5174.66	5325.17	6176.78	6602.46	6978.09	7294.69	7547.7	7718.9	7794.07	7763.67	7629.16	0.00779433		242234	270566	242557	258753	275464	292410	310640
129	'US-MA'	US Mid-Atlantics (Delaware, Maryland, New Jersey, Ohio, Pennsylvania, West Virginia, Virginia)		1.09059e+06	1.17368e+06	1.00722e+06	1.12006e+06	1.23195e+06	1.34069e+06	1.45153e+06	1.56197e+06	1.66948e+06	1.7717e+06	1.86718e+06	0.0108122		273790	297890	311064	331833	353265	374996	398375	423184	449132	475873	503062	0.0122413		7577.37	7797.77	9044.8	9668.14	10218.2	10681.8	11052.3	11303	11413	11368.5	11171.6	0.00779433		354709	396196	355183	378898	403369	428182	454877
130	'US-CAR'	US Carolinas (North Carolina, South Carolina)		322279	346833	297643	330986	364051	396186	428940	461576	493345	523553	551767	0.0108122		80907.3	88028.9	91922	98059.5	104393	110814	117723	125054	132722	140624	148659	0.0122413		2239.18	2304.31	2672.81	2857.01	3019.56	3156.56	3266.04	3340.12	3372.65	3359.49	3301.29	0.00779432		104819	117079	104959	111967	119199	126531	134420
131	'US-S'	US Southern (Alabama, Florida, Georgia)		762503	820596	704215	783103	861333	937365	1.01486e+06	1.09207e+06	1.16724e+06	1.23871e+06	1.30547e+06	0.0108122		191424	208274	217485	232006	246990	262184	278529	295875	314017	332713	351723	0.0122413		5297.82	5451.92	6323.8	6759.61	7144.18	7468.32	7727.35	7902.62	7979.59	7948.46	7810.76	0.00779433		247999	277006	248331	264912	282021	299370	318034
132	'US-TVA'	US TVA (Kentucky, Tennessee)		237852	255973	219670	244277	268680	292397	316571	340657	364103	386398	407221	0.0108122		59712	64968	67841.2	72370.8	77044.9	81784.4	86883.2	92293.8	97952.9	103785	109715	0.0122413		1652.58	1700.65	1972.62	2108.56	2228.52	2329.63	2410.44	2465.11	2489.12	2479.41	2436.45	0.00779434		77359.8	86407.9	77463.2	82635.3	87972.3	93384	99206
133	'US-MW'	US Midwest (Illinois, Indiana, Iowa, Michigan, Minnesota, Missouri, North Dakota, South Dakota, Wisconsin)		1.11071e+06	1.19534e+06	1.02581e+06	1.14072e+06	1.25468e+06	1.36543e+06	1.47832e+06	1.59079e+06	1.70028e+06	1.80439e+06	1.90163e+06	0.0108122		278842	303386	316803	337956	359783	381915	405725	430992	457418	484654	512344	0.0122413		7717.18	7941.65	9211.68	9846.52	10406.7	10878.9	11256.2	11511.5	11623.6	11578.3	11377.7	0.00779433		361253	403506	361736	385889	410811	436083	463270
134	'US-C'	US Central (Kansas, Nebraska, Oklahoma)		188099	202430	173721	193181	212479	231235	250353	269400	287942	305573	322041	0.0108122		47221.8	51378.4	53650.6	57232.8	60929.1	64677.2	68709.5	72988.3	77463.7	82076	86765.3	0.0122413		1306.9	1344.92	1560	1667.51	1762.37	1842.34	1906.24	1949.47	1968.46	1960.78	1926.81	0.00779433		61178.2	68333.6	61259.9	65350.2	69570.8	73850.5	78454.7
135	'US-TX'	US Texas		592593	637742	547294	608603	669401	728491	788718	848726	907142	962687	1.01457e+06	0.0108122		148769	161864	169022	180308	191953	203761	216464	229945	244044	258575	273348	0.0122413		4117.3	4237.06	4914.66	5253.36	5552.24	5804.15	6005.46	6141.67	6201.48	6177.3	6070.27	0.00779433		192737	215280	192995	205881	219178	232661	247166
136	'US-SW'	US Southwest (Arizona, New Mexico)		192284	206934	177586	197479	217207	236380	255923	275395	294349	312373	329207	0.0108122		48272.5	52521.6	54844.3	58506.2	62284.8	66116.3	70238.4	74612.4	79187.3	83902.3	88695.9	0.0122413		1335.98	1374.84	1594.71	1704.61	1801.59	1883.33	1948.65	1992.85	2012.26	2004.41	1969.68	0.00779435		62539.4	69854	62623	66804.2	71118.7	75493.7	80200.4
137	'US-NW'	US Northwest (Colorado, District of Columbia, Idaho, Montana, Nevada, Oregon, Utah, Washington, Wyoming)		571447	614984	527764	586885	645514	702494	760572	818440	874771	928334	978362	0.0108122		143460	156088	162991	173873	185103	196490	208740	221739	235335	249347	263593	0.0122413		3970.38	4085.86	4739.28	5065.89	5354.1	5597.02	5791.15	5922.51	5980.19	5956.86	5853.66	0.00779433		185860	207598	186108	198534	211356	224358	238346
138	'US-CA'	US California		844474	908813	779921	867289	953929	1.03813e+06	1.12396e+06	1.20948e+06	1.29272e+06	1.37188e+06	1.44581e+06	0.0108122		212003	230664	240865	256947	273542	290369	308472	327682	347774	368481	389534	0.0122413		5867.36	6038.02	7003.63	7486.29	7912.2	8271.19	8558.07	8752.18	8837.42	8802.95	8650.44	0.00779433		274660	306785	275027	293390	312339	331553	352223
139	'US-AK'	US Alaska		15930.2	17143.9	14712.5	16360.6	17995	19583.4	21202.4	22815.6	24386.1	25879.2	27273.8	0.0108122		3999.24	4351.26	4543.69	4847.07	5160.12	5477.55	5819.02	6181.4	6560.47	6951.06	7348.2	0.0122414		110.682	113.901	132.117	141.222	149.256	156.028	161.439	165.101	166.71	166.06	163.182	0.00779435		5181.2	5787.2	5188.13	5534.53	5891.98	6254.44	6644.35
140	'US-HI'	US Hawaii		30884	33237	28523.2	31718.4	34887.2	37966.6	41105.6	44232.8	47277.3	50172.3	52876.1	0.0108123		7753.35	8435.82	8808.89	9397.04	10004	10619.4	11281.5	11984	12718.8	13476.1	14246.1	0.0122414		214.58	220.822	256.136	273.788	289.366	302.493	312.986	320.084	323.201	321.942	316.364	0.00779442		10044.8	11219.7	10058.3	10729.8	11422.9	12125.5	12881.5
141	'US-GU'	US Gulf (Arkansas, Louisiana, Mississippi)		229565	247055	212016	235767	259319	282210	305541	328788	351418	372935	393033	0.0108122		57631.6	62704.5	65477.5	69849.4	74360.6	78935	83856.2	89078.3	94540.2	100169	105892	0.0122413		1595	1641.4	1903.89	2035.1	2150.88	2248.47	2326.45	2379.22	2402.39	2393.02	2351.56	0.00779433		74664.5	83397.4	74764.3	79756.2	84907.3	90130.5	95749.6
142	'MX-NW'	Mexico Northwest		49164.3	59291	72155.7	81626.9	91479.6	101011	112294	125605	141218	159327	179957	0.0262906		15776.7	16595.7	17354.5	19942.4	22612.9	25189.1	28227.3	31810	36026.6	40959	46661.8	0.0219247		9.83483	5.92969	64.9987	72.0869	79.3145	86.1783	94.0154	102.865	112.693	123.327	134.387	0.0536874		2342.29	2676.34	2988.22	3269.99	3583.85	3911.74	4307.54
143	'MX-N'	Mexico North		84038.3	101348	123338	139528	156369	172662	191948	214702	241389	272343	307606	0.0262906		26967.7	28367.6	29664.6	34088.3	38653	43056.5	48249.9	54373.9	61581.5	70012.6	79760.6	0.0219247		16.811	10.1358	111.104	123.221	135.575	147.308	160.704	175.831	192.631	210.806	229.712	0.0536875		4003.75	4574.75	5107.87	5589.51	6126	6686.47	7363.03
144	'MX-C'	Mexico Centre		138952	167573	203933	230701	258547	285487	317375	354997	399123	450304	508609	0.0262906		44589.5	46904.2	49048.7	56362.9	63910.5	71191.5	79778.5	89904.1	101821	115762	131880	0.0219247		27.796	16.759	183.705	203.738	224.165	243.564	265.714	290.727	318.503	348.556	379.816	0.0536875		6619.97	7564.09	8445.56	9241.93	10129	11055.7	12174.3
145	MX-S'	Mexico South		324796	391696	476684	539254	604344	667315	741852	829790	932935	1.05257e+06	1.18885e+06	0.0262906		104226	109637	114649	131746	149388	166407	186479	210147	238004	270589	308263	0.0219247		64.9721	39.1735	429.402	476.23	523.977	569.322	621.097	679.563	744.489	814.736	887.805	0.0536875		15473.9	17680.8	19741.2	21602.6	23676.1	25842.3	28457.1
[truncated: 439 more columns]

## Sheet: ICCT Data ref
										The numbers come from the ICCT roadmap model					ICCT	International Council on Clean Transportation					The ICCT’s Global Transportation Roadmap model is a tool developed to help policy makers worldwide identify and understand trends in the transportation sector, assess emission effects of different policy options, and frame plans to effectively reduce emissions of both greenhouse gases (GHGs) and local air pollutants.
										ICCT GLOBAL TRANSPORTATION ROADMAP MODEL											The model and supporting documentations are posted on our website - www.theicct.org/transportation-roadmap.
																					Your feedback is welcome, and comments should be sent to roadmap@theicct.org
										Version: Public Release 1-0
										Last Update: December 1, 2012
														Orange color depicts the related sheet in the ICCT Roadmap
LDV activity
	ANNUAL LDV ACTIVITY (billion vehicle-km)									USA		PASSENGER ACTIVITY BY MODE (billion passenger-km)														USA		PASSENGER ACTIVITY BY MODE (billion passenger-km)
Region	Year										Mode	2000	2005	2010	2015	2020	2025	2030	2035	2040	2045	2050						Mode	2000	2005	2010	2015	2020	2025	2030	2035	2040	2045	2050
	2000	2005	2010	2015	2020	2025	2030				LDV (LDV Calc sheet)	P12	Q12	R12	S12	T12	U12	V12	W12	X12	Y12	Z12				Sum of them		LDV	6371.93	6954.43	5866.35	6565.67	7259.4	7934.16	8624.06	9313.54	9986.77	10629.1	11231.1
United states	4059	4430	4251	4768	5272	5762	6263				Bus (Bus Calc sheet)	P12	Q12	R12	S12	T12	U12	V12	W12	X12	Y12	Z12						Bus	536.929	480.056	505.285	519.933	534.246	547.634	559.161	568.584	575.732	580.404	582.708
Canada	285	303	328	380	429	472	520				2W (2W Calc sheet)	P12	Q12	R12	S12	T12	U12	V12	W12	X12	Y12	Z12						2W	25.1358	27.7967	32.3072	35.7148	39.0828	42.3433	45.6434	48.9063	52.0553	55.0202	57.7598
Mexico	141	197	285	335	387	437	497				3W																	3W	0	0	0	0	0	0	0	0	0	0	0
Brazil	304	326	431	514	605	688	789				Passenger Rail (Passenger Rail sheet)	P152	Q152	R152	S152	T152	U152	V152	W152	X152	Y152	Z152						Passenger Rail	48.177	49.5783	57.5069	61.4701	64.9673	67.9149	70.2705	71.8643	72.5642	72.2812	71.0289
Rest of Latin America	202	215	273	328	385	437	500																			Total (rail+road)		Total	6982.17	7511.86	6461.45	7182.79	7897.7	8592.05	9299.13	10002.9	10687.1	11336.8	11942.6
																								Sum except passenger rail				Total road	6933.99	7462.28	6403.94	7121.32	7832.73	8524.14	9228.86	9931.03	10614.6	11264.5	11871.5
																												3W share [%]	0	0	0	0	0	0	0	0	0	0	0
EU-27	2615	2824	2881	3063	3294	3522	3773																					2W share [%]	0.00362501	0.00372496	0.0050449	0.00501519	0.00498967	0.00496746	0.00494573	0.00492459	0.00490414	0.00488439	0.0048654
																												2w/3w share [%]	0.00362501	0.00372496	0.0050449	0.00501519	0.00498967	0.00496746	0.00494573	0.00492459	0.00490414	0.00488439	0.0048654
																												LDV share [%]	0.918941	0.931944	0.916053	0.921974	0.926803	0.930787	0.934466	0.937822	0.940856	0.943591	0.94605
Russia	254	313	400	513	649	788	944																					Bus share [%]	0.0774343	0.064331	0.0789022	0.0730108	0.0682069	0.0642451	0.0605882	0.0572533	0.0542398	0.0515251	0.0490844
Rest of Europe	227	256	286	356	431	508	617			USA		FREIGHT ACTIVITY BY MODE (billion tonne-km)														USA		FREIGHT ACTIVITY BY MODE (billion tonne-km)
China	185	411	993	1452	2080	2554	3147				Mode	2000	2005	2010	2015	2020	2025	2030	2035	2040	2045	2050						Mode	2000	2005	2010	2015	2020	2025	2030	2035	2040	2045	2050
Japan	698	690	616	629	636	637	635				LHDT (LHDT Calc)	P12	Q12	R12	S12	T12	U12	V12	W12	X12	Y12	Z12						LHDT	83.8824	94.5015	98.5216	105.1	111.888	118.771	126.175	134.033	142.251	150.721	159.332
India	52	94	169	326	561	828	1186				MHDT (MHDT Calc)	P12	Q12	R12	S12	T12	U12	V12	W12	X12	Y12	Z12						MHDT	180.148	202.629	211.671	225.804	240.387	255.175	271.084	287.965	305.622	323.819	342.321
South Korea	142	169	184	249	300	327	358				HHDT (HHDT Calc)	P12	Q12	R12	S12	T12	U12	V12	W12	X12	Y12	Z12						HHDT	1476.73	1596.86	1667.55	1778.89	1893.78	2010.28	2135.61	2268.61	2407.71	2551.07	2696.82
Australia	139	154	173	214	244	261	280				Freight Rail (Freight Rail SHEET)	P152	Q152	R152	S152	T152	U152	V152	W152	X152	Y152	Z152						Freight Rail	2255.24	2519.01	2258.25	2409.03	2564.62	2722.39	2892.11	3072.22	3260.59	3454.73	3652.11
Rest of Asia-Pacific	176	250	362	453	557	662	804																			Total (Rail+Road)		Total	3996	4413	4236	4518.83	4810.68	5106.61	5424.98	5762.82	6116.17	6480.34	6850.59
Middle East	213	286	390	502	639	803	1015																	Sum except passenger rail				Total road	1740.76	1893.99	1977.75	2109.8	2246.06	2384.23	2532.87	2690.6	2855.58	3025.61	3198.47
Africa	154	183	208	242	274	297	325																					LHDT+MHDT share [%]	0.151675	0.156881	0.156841	0.156841	0.156841	0.156841	0.156841	0.156841	0.156841	0.156841	0.156841
Global	9846	11101	12230	14324	16743	18983	21653																					LDT share [%]	0.0481872	0.0498956	0.0498151	0.0498151	0.0498151	0.0498151	0.0498151	0.0498151	0.0498151	0.0498151	0.0498151
																												MDT share [%]	0.103488	0.106985	0.107026	0.107026	0.107026	0.107026	0.107026	0.107026	0.107026	0.107026	0.107026
																												HDT share [%]	0.848325	0.843119	0.843159	0.843159	0.843159	0.843159	0.843159	0.843159	0.843159	0.843159	0.843159
Bus activity
	ANNUAL BUS ACTIVITY (billion vehicle-km)									Canada		PASSENGER ACTIVITY BY MODE (billion passenger-km)														Canada		PASSENGER ACTIVITY BY MODE (billion passenger-km)
Region	Year										Mode	2000	2005	2010	2015	2020	2025	2030	2035	2040	2045	2050						Mode	2000	2005	2010	2015	2020	2025	2030	2035	2040	2045	2050
	2000	2005	2010	2015	2020	2025	2030				LDV (LDV Calc sheet)	P13	Q13	R13	S13	T13	U13	V13	W13	X13	Y13	Z13				Sum of them		LDV	456.265	499.819	533.837	618.71	698.669	769.871	847.337	929.453	1013.7	1097.49	1178.58
United states	21	21	25	26	26	27	28				Bus (Bus Calc sheet)	P13	Q13	R13	S13	T13	U13	V13	W13	X13	Y13	Z13						Bus	46.3955	49.6938	56.918	57.4904	58.3819	59.4076	60.2159	60.75	61.0628	61.2161	61.2303
Canada	3	3	3	3	4	4	4				2W (2W Calc sheet)	P13	Q13	R13	S13	T13	U13	V13	W13	X13	Y13	Z13						2W	1.77082	2.9916	3.8144	4.31967	4.79235	5.21521	5.66986	6.14561	6.6281	7.10304	7.55768
Mexico	13	14	15	17	18	20	21				3W																	3W	0	0	0	0	0	0	0	0	0	0	0
Brazil	27	26	26	26	25	27	28				Passenger Rail (Passenger Rail sheet)	P153	Q153	R153	S153	T153	U153	V153	W153	X153	Y153	Z153						Passenger Rail	1.5686	1.4958	1.4304	1.5724	1.69743	1.80223	1.90113	1.98622	2.05065	2.08939	2.09898
Rest of Latin America	28	36	50	54	58	62	67																			Total (rail+road)		Total	506	554	596	682.093	763.541	836.296	915.123	998.335	1083.44	1167.9	1249.46
																								Sum except passenger rail				Total road	504.431	552.504	594.57	680.52	761.843	834.494	913.222	996.349	1081.39	1165.81	1247.36
																												3W share [%]	0	0	0	0	0	0	0	0	0	0	0
																												2W share [%]	0.00351053	0.00541462	0.0064154	0.0063476	0.00629047	0.00624955	0.00620863	0.00616813	0.00612926	0.0060928	0.00605892
																												2w/3w share [%]	0.00351053	0.00541462	0.0064154	0.0063476	0.00629047	0.00624955	0.00620863	0.00616813	0.00612926	0.0060928	0.00605892
EU-27	34	35	34	36	35	35	35																					LDV share [%]	0.904514	0.904643	0.897855	0.909172	0.917077	0.92256	0.927854	0.932859	0.937404	0.941398	0.944853
Russia	14	19	25	28	28	27	26																					Bus share [%]	0.0919759	0.0899428	0.0957298	0.08448	0.0766324	0.07119	0.0659378	0.0609726	0.0564671	0.0525095	0.0490878
Rest of Europe	20	22	25	26	28	29	29			Canada		FREIGHT ACTIVITY BY MODE (billion tonne-km)														Canada		FREIGHT ACTIVITY BY MODE (billion tonne-km)
China	197	193	224	261	306	348	406				Mode	2000	2005	2010	2015	2020	2025	2030	2035	2040	2045	2050				Sum of them		Mode	2000	2005	2010	2015	2020	2025	2030	2035	2040	2045	2050
Japan	7	7	6	5	5	5	4				LHDT (LHDT Calc)	P13	Q13	R13	S13	T13	U13	V13	W13	X13	Y13	Z13						LHDT	17.6654	21.468	25.1908	26.6859	28.1724	29.5657	31.1441	32.9051	34.8258	36.8714	39.0008
India	39	48	62	95	129	154	177				MHDT (MHDT Calc)	P13	Q13	R13	S13	T13	U13	V13	W13	X13	Y13	Z13						MHDT	22.4114	20.5264	21.0016	22.2481	23.4874	24.649	25.9649	27.4331	29.0344	30.7398	32.5151
South Korea	33	39	45	49	52	54	55				HHDT (HHDT Calc)	P13	Q13	R13	S13	T13	U13	V13	W13	X13	Y13	Z13						HHDT	164.737	233.574	212.697	225.321	237.873	249.637	262.964	277.833	294.05	311.322	329.301
Australia	2	2	2	2	2	2	2				Freight Rail (Freight Rail SHEET)	P153	Q153	R153	S153	T153	U153	V153	W153	X153	Y153	Z153						Freight Rail	322.513	352.15	299.664	317.45	335.133	351.707	370.483	391.432	414.281	438.615	463.945
Rest of Asia-Pacific	81	104	122	129	138	147	159																			Total (rail+road)		Total	527.326	627.718	558.554	591.705	624.665	655.559	690.556	729.604	772.191	817.548	864.762
Middle East	17	23	41	48	57	66	77																	Sum except passenger rail				Total road	204.813	275.568	258.89	274.255	289.532	303.851	320.073	338.171	357.911	378.934	400.817
Africa	62	70	77	83	89	95	102																					LHDT+MHDT share [%]	0.195675	0.152392	0.178425	0.178425	0.178425	0.178425	0.178425	0.178425	0.178425	0.178425	0.178425
Global	598	662	782	888	1000	1102	1220																					LDT share [%]	0.0862513	0.0779043	0.0973031	0.0973031	0.0973031	0.0973031	0.0973031	0.0973031	0.0973031	0.0973031	0.0973031
																												MDT share [%]	0.109423	0.0744875	0.0811219	0.0811219	0.0811219	0.0811219	0.0811219	0.0811219	0.0811219	0.0811219	0.0811219
																												HDT share [%]	0.804325	0.847608	0.821575	0.821575	0.821575	0.821575	0.821575	0.821575	0.821575	0.821575	0.821575
Motorcycler activity
	ANNUAL MOTORCYCLE ACTIVITY (billion vehicle-km)									Mexico		PASSENGER ACTIVITY BY MODE (billion passenger-km)														Mexico		PASSENGER ACTIVITY BY MODE (billion passenger-km)
Region	Year										Mode	2000	2005	2010	2015	2020	2025	2030	2035	2040	2045	2050						Mode	2000	2005	2010	2015	2020	2025	2030	2035	2040	2045	2050
	2000	2005	2010	2015	2020	2025	2030				LDV (LDV Calc sheet)	P14	Q14	R14	S14	T14	U14	V14	W14	X14	Y14	Z14				Sum of them		LDV	211.7	290.253	410.565	483.231	558.35	630.56	716.573	833.14	992.331	1183.45	1407.93
United states	17	17	30	19	20	22	24				Bus (Bus Calc sheet)	P14	Q14	R14	S14	T14	U14	V14	W14	X14	Y14	Z14						Bus	381.967	423.031	452.042	492.316	534.696	576.172	624.721	666.658	693.003	716.987	737.449
Canada	2	2	3	3	4	4	4				2W (2W Calc sheet)	P14	Q14	R14	S14	T14	U14	V14	W14	X14	Y14	Z14						2W	3.28356	6.62448	13.5043	15.5627	17.6932	19.7441	22.1753	25.2961	29.332	34.1092	39.6492
Mexico	3	6	12	14	16	18	20				3W																	3W	0	0	0	0	0	0	0	0	0	0	0
Brazil	26	46	100	112	121	131	144				Passenger Rail (Passenger Rail sheet)	P154	Q154	R154	S154	T154	U154	V154	W154	X154	Y154	Z154						Passenger Rail	0.119414	0.071998	0.78921	0.875276	0.963032	1.04637	1.14153	1.24899	1.36832	1.49743	1.63172
Rest of Latin America	41	59	113	131	149	166	187																			Total (rail+road)		Total	597.07	719.98	876.9	991.985	1111.7	1227.52	1364.61	1526.34	1716.03	1936.04	2186.66
																								Sum except passenger rail				Total road	596.951	719.908	876.111	991.11	1110.74	1226.48	1363.47	1525.09	1714.67	1934.54	2185.03
																												3W share [%]	0	0	0	0	0	0	0	0	0	0	0
																												2W share [%]	0.00550055	0.00920184	0.0154139	0.0157023	0.0159292	0.0160982	0.0162638	0.0165866	0.0171065	0.0176317	0.0181459
																												2w/3w share [%]	0.00550055	0.00920184	0.0154139	0.0157023	0.0159292	0.0160982	0.0162638	0.0165866	0.0171065	0.0176317	0.0181459
EU-27	99	113	110	205	227	250	275																					LDV share [%]	0.354635	0.403181	0.468622	0.487565	0.502683	0.514123	0.525551	0.546288	0.578732	0.611745	0.644353
Russia	28	29	33	40	48	57	66																					Bus share [%]	0.639864	0.587618	0.515964	0.496732	0.481388	0.469778	0.458185	0.437126	0.404162	0.370623	0.337501
Rest of Europe	14	13	17	20	24	28	32			Mexico		FREIGHT ACTIVITY BY MODE (billion tonne-km)														Mexico		FREIGHT ACTIVITY BY MODE (billion tonne-km)
China	463	869	1379	1789	2405	2875	3365				Mode	2000	2005	2010	2015	2020	2025	2030	2035	2040	2045	2050				Sum of them		Mode	2000	2005	2010	2015	2020	2025	2030	2035	2040	2045	2050
Japan	68	63	61	61	60	60	59				LHDT (LHDT Calc)	P14	Q14	R14	S14	T14	U14	V14	W14	X14	Y14	Z14						LHDT	12.1004	12.7286	13.3105	15.2954	17.3436	19.3195	21.6498	24.3976	27.6317	31.4147	35.7887
India	379	567	855	1347	1885	2314	2754				MHDT (MHDT Calc)	P14	Q14	R14	S14	T14	U14	V14	W14	X14	Y14	Z14						MHDT	25.3178	26.6321	27.8497	32.0028	36.2882	40.4224	45.298	51.0473	57.814	65.7293	74.8809
South Korea	4	6	6	8	10	10	11				HHDT (HHDT Calc)	P14	Q14	R14	S14	T14	U14	V14	W14	X14	Y14	Z14						HHDT	154.142	162.143	169.557	194.842	220.933	246.102	275.787	310.79	351.987	400.178	455.896
Australia	2	2	2	2	2	2	3				Freight Rail (Freight Rail SHEET)	P154	Q154	R154	S154	T154	U154	V154	W154	X154	Y154	Z154						Freight Rail	28.4399	32.4959	36.2828	39.7041	43.515	47.4962	52.302	58.1839	65.4785	74.6309	86.217
Rest of Asia-Pacific	357	545	794	878	1014	1152	1337																			Total (rail+road)		Total	220	234	247	281.844	318.08	353.341	395.037	444.419	502.912	571.953	652.782
Middle East	11	15	23	29	36	45	55																	Sum except passenger rail				Total road	191.56	201.504	210.717	242.14	274.565	305.844	342.735	386.235	437.433	497.322	566.565
Africa	20	30	38	42	46	50	54																					LHDT+MHDT share [%]	0.195334	0.195334	0.195334	0.195334	0.195334	0.195334	0.195334	0.195334	0.195334	0.195334	0.195334
Global	1534	2382	3576	4700	6067	7184	8390																					LDT share [%]	0.0631678	0.0631678	0.0631678	0.0631678	0.0631678	0.0631678	0.0631678	0.0631678	0.0631678	0.0631678	0.0631678
																												MDT share [%]	0.132166	0.132166	0.132166	0.132166	0.132166	0.132166	0.132166	0.132166	0.132166	0.132166	0.132166
																												HDT share [%]	0.804666	0.804666	0.804666	0.804666	0.804666	0.804666	0.804666	0.804666	0.804666	0.804666	0.804666
Truck activity										Brazil		PASSENGER ACTIVITY BY MODE (billion passenger-km)														Brazil		PASSENGER ACTIVITY BY MODE (billion passenger-km)
	ANNUAL TRUCK ACTIVITY (billion vehicle-km)										Mode	2000	2005	2010	2015	2020	2025	2030	2035	2040	2045	2050						Mode	2000	2005	2010	2015	2020	2025	2030	2035	2040	2045	2050
Region	Year										LDV (LDV Calc sheet)	P15	Q15	R15	S15	T15	U15	V15	W15	X15	Y15	Z15				Sum of them		LDV	557.152	591.478	801.401	941	1096.79	1255.17	1445.38	1670.99	1991.57	2371.69	2803.66
	2000	2005	2010	2015	2020	2025	2030				Bus (Bus Calc sheet)	P15	Q15	R15	S15	T15	U15	V15	W15	X15	Y15	Z15						Bus	545.215	516.369	539.908	559.577	588.654	621.674	663.201	715.196	716.951	710.334	699.808
United states	388	422	516	552	589	624	661				2W (2W Calc sheet)	P15	Q15	R15	S15	T15	U15	V15	W15	X15	Y15	Z15						2W	28.3512	50.8645	109.33	123.623	133.689	144.7	158.587	176.137	204.316	240.907	288.312
Canada	81	84	89	95	100	105	110				3W																	3W	0	0	0	0	0	0	0	0	0	0	0
Mexico	74	76	80	91	103	115	129				Passenger Rail (Passenger Rail sheet)	P155	Q155	R155	S155	T155	U155	V155	W155	X155	Y155	Z155						Passenger Rail	0.281666	0.288639	0.361359	0.395042	0.432264	0.470057	0.514176	0.564615	0.620758	0.680963	0.741835
Brazil	74	74	82	79	81	88	96																			Total (rail+road)		Total	1131	1159	1451	1624.59	1819.56	2022.01	2267.68	2562.89	2913.46	3323.61	3792.52
Rest of Latin America	102	111	146	174	203	231	263																	Sum except passenger rail				Total road	1130.72	1158.71	1450.64	1624.2	1819.13	2021.54	2267.17	2562.32	2912.84	3322.93	3791.78
																												3W share [%]	0	0	0	0	0	0	0	0	0	0	0
																												2W share [%]	0.0250736	0.0438974	0.0753665	0.0761129	0.0734906	0.0715788	0.0699491	0.0687413	0.0701432	0.0724983	0.0760361
																												2w/3w share [%]	0.0250736	0.0438974	0.0753665	0.0761129	0.0734906	0.0715788	0.0699491	0.0687413	0.0701432	0.0724983	0.0760361
																												LDV share [%]	0.492742	0.510462	0.552447	0.579363	0.602918	0.620897	0.637527	0.652138	0.683722	0.713735	0.739405
EU-27	431	503	695	726	759	811	847																					Bus share [%]	0.482185	0.445641	0.372187	0.344524	0.323591	0.307524	0.292524	0.27912	0.246135	0.213767	0.184559
Russia	87	101	104	108	112	117	122			Brazil		FREIGHT ACTIVITY BY MODE (billion tonne-km)														Brazil		FREIGHT ACTIVITY BY MODE (billion tonne-km)
Rest of Europe	63	88	118	128	140	152	166				Mode	2000	2005	2010	2015	2020	2025	2030	2035	2040	2045	2050				Sum of them		Mode	2000	2005	2010	2015	2020	2025	2030	2035	2040	2045	2050
China	240	298	470	602	722	814	930				LHDT (LHDT Calc)	P15	Q15	R15	S15	T15	U15	V15	W15	X15	Y15	Z15						LHDT	2.7183	2.25703	2.0874	2.23873	2.48722	2.64582	2.83048	3.04536	3.29504	3.58387	3.91364
Japan	262	243	228	228	225	220	215				MHDT (MHDT Calc)	P15	Q15	R15	S15	T15	U15	V15	W15	X15	Y15	Z15						MHDT	20.2007	15.508	12.6238	13.6359	15.0228	15.9808	17.0961	18.394	19.9021	21.6466	23.6384
India	62	86	143	232	334	422	518				HHDT (HHDT Calc)	P15	Q15	R15	S15	T15	U15	V15	W15	X15	Y15	Z15						HHDT	355.245	488.537	712.3	773.686	847.744	901.803	964.74	1037.98	1123.08	1221.53	1333.92
South Korea	44	34	54	88	114	130	147				Freight Rail (Freight Rail SHEET)	P155	Q155	R155	S155	T155	U155	V155	W155	X155	Y155	Z155						Freight Rail	154.837	221.698	266.988	257.531	241.253	248.213	259.867	277.741	303.779	340.5	391.187
Australia	44	53	55	58	60	62	63																			Total (rail+road)		Total	533	728	994	1047.09	1106.51	1168.64	1244.53	1337.16	1450.06	1587.26	1752.66
Rest of Asia-Pacific	177	219	262	317	379	440	519																	Sum except passenger rail				Total road	378.163	506.302	727.012	789.56	865.255	920.429	984.667	1059.42	1146.28	1246.76	1361.48
Middle East	68	96	161	206	260	322	402																					LHDT+MHDT share [%]	0.0606061	0.0350877	0.0202352	0.0201057	0.0202369	0.0202369	0.0202369	0.0202369	0.0202369	0.0202369	0.0202369
Africa	139	164	184	210	235	256	280																					LDT share [%]	0.00718816	0.00445787	0.00287121	0.00283542	0.00287455	0.00287455	0.00287455	0.00287455	0.00287455	0.00287455	0.00287455
Global	2336	2652	3387	3894	4416	4909	5468																					MDT share [%]	0.0534179	0.0306299	0.017364	0.0172703	0.0173623	0.0173623	0.0173623	0.0173623	0.0173623	0.0173623	0.0173623
																												HDT share [%]	0.939394	0.964912	0.979765	0.979894	0.979763	0.979763	0.979763	0.979763	0.979763	0.979763	0.979763
Rail P-km										Latin America -31		PASSENGER ACTIVITY BY MODE (billion passenger-km)														Latin America -31		PASSENGER ACTIVITY BY MODE (billion passenger-km)
	ANNUAL PASS ENGER RAIL ACTIVITY (billion passenger-km)										Mode	2000	2005	2010	2015	2020	2025	2030	2035	2040	2045	2050						Mode	2000	2005	2010	2015	2020	2025	2030	2035	2040	2045	2050
Region	Year										LDV (LDV Calc sheet)	P16	Q16	R16	S16	T16	U16	V16	W16	X16	Y16	Z16				Sum of them		LDV	365.533	380.604	492.086	590.82	692.335	786.275	901.336	1042.14	1213.75	1421.51	1684.03
	2000	2005	2010	2015	2020	2025	2030				Bus (Bus Calc sheet)	P16	Q16	R16	S16	T16	U16	V16	W16	X16	Y16	Z16						Bus	549.268	673.151	937.463	1008.47	1085.45	1160.1	1248.26	1352.72	1476.92	1625.08	1787.33
United states	48	50	58	61	65	68	70				2W (2W Calc sheet)	P16	Q16	R16	S16	T16	U16	V16	W16	X16	Y16	Z16						2W	44.7	64.1847	123.881	143.553	163.925	182.908	205.986	234.034	268.018	308.975	359.645
Canada	2	1	1	2	2	2	2				3W																	3W	0	0	0	0	0	0	0	0	0	0	0
Mexico	0	0	1	1	1	1	1				Passenger Rail (Passenger Rail sheet)	P156	Q156	R156	S156	T156	U156	V156	W156	X156	Y156	Z156						Passenger Rail	7.93296	8.22098	8.7482	9.63536	10.5633	11.437	12.4679	13.6805	15.0986	16.7423	18.6225
Brazil	0	0	0	0	0	0	1																			Total (rail+road)		Total	967.434	1126.16	1562.18	1752.48	1952.28	2140.72	2368.05	2642.58	2973.78	3372.31	3849.63
Rest of Latin America	8	8	9	10	11	11	12																	Sum except passenger rail				Total road	959.501	1117.94	1553.43	1742.85	1941.71	2129.28	2355.58	2628.9	2958.68	3355.57	3831.01
																												3W share [%]	0	0	0	0	0	0	0	0	0	0	0
																												2W share [%]	0.0465867	0.0574134	0.0797466	0.082367	0.0844231	0.0859013	0.0874459	0.0890235	0.0905869	0.0920783	0.0938774
																												2w/3w share [%]	0.0465867	0.0574134	0.0797466	0.082367	0.0844231	0.0859013	0.0874459	0.0890235	0.0905869	0.0920783	0.0938774
																												LDV share [%]	0.380962	0.340451	0.316774	0.338997	0.356559	0.369268	0.382639	0.396418	0.410233	0.423628	0.439579
EU-27	448	459	476	508	538	564	591																					Bus share [%]	0.572451	0.602135	0.603479	0.578636	0.559018	0.544831	0.529915	0.514559	0.49918	0.484294	0.466543
Russia	239	229	201	253	312	371	436			Latin America -31		FREIGHT ACTIVITY BY MODE (billion tonne-km)														Latin America -31		FREIGHT ACTIVITY BY MODE (billion tonne-km)
Rest of Europe	110	126	143	159	175	190	206				Mode	2000	2005	2010	2015	2020	2025	2030	2035	2040	2045	2050				Sum of them		Mode	2000	2005	2010	2015	2020	2025	2030	2035	2040	2045	2050
China	453	522	719	842	1003	1126	1266				LHDT (LHDT Calc)	P16	Q16	R16	S16	T16	U16	V16	W16	X16	Y16	Z16						LHDT	16.1299	17.8697	23.0419	27.5421	32.1948	36.548	41.7474	47.9744	55.4419	64.3982	75.1263
Japan	384	391	394	382	369	357	342				MHDT (MHDT Calc)	P16	Q16	R16	S16	T16	U16	V16	W16	X16	Y16	Z16						MHDT	68.4138	72.4235	85.955	102.742	120.098	136.337	155.733	178.962	206.819	240.229	280.249
India	434	535	776	1200	1646	1984	2312				HHDT (HHDT Calc)	P16	Q16	R16	S16	T16	U16	V16	W16	X16	Y16	Z16						HHDT	87.212	100.133	152.657	182.471	213.296	242.137	276.584	317.84	367.313	426.65	497.726
South Korea	49	54	59	66	71	73	75				Freight Rail (Freight Rail SHEET)	P156	Q156	R156	S156	T156	U156	V156	W156	X156	Y156	Z156						Freight Rail	68.6542	71.9774	79.6739	88.0773	97.3467	106.71	117.808	131.157	147.446	167.597	192.834
Australia	11	12	12	14	15	16	17																			Total (rail+road)		Total	240.41	262.404	341.328	400.833	462.936	521.732	591.873	675.933	777.02	898.875	1045.93
Rest of Asia-Pacific	169	199	243	265	291	318	353																	Sum except passenger rail				Total road	171.756	190.427	261.654	312.755	365.589	415.022	474.065	544.776	629.573	731.278	853.101
Middle East	13	16	18	22	27	32	38																					LHDT+MHDT share [%]	0.492232	0.474163	0.416569	0.416569	0.416569	0.416569	0.416569	0.416569	0.416569	0.416569	0.416569
Africa	18	20	23	25	28	29	32																					LDT share [%]	0.0939118	0.0938404	0.0880626	0.0880626	0.0880626	0.0880626	0.0880626	0.0880626	0.0880626	0.0880626	0.0880626
Global	2386	2622	3133	3810	4554	5142	5754																					MDT share [%]	0.398321	0.380322	0.328506	0.328506	0.328506	0.328506	0.328506	0.328506	0.328506	0.328506	0.328506
																												HDT share [%]	0.507768	0.525837	0.583431	0.583431	0.583431	0.583431	0.583431	0.583431	0.583431	0.583431	0.583431
										EU-27		PASSENGER ACTIVITY BY MODE (billion passenger-km)														EU-27		PASSENGER ACTIVITY BY MODE (billion passenger-km)
Rail F-tonne km											Mode	2000	2005	2010	2015	2020	2025	2030	2035	2040	2045	2050						Mode	2000	2005	2010	2015	2020	2025	2030	2035	2040	2045	2050
	ANNUAL FREIGHT RAIL ACTIVITY (billion tonne-km)										LDV (LDV Calc sheet)	P17	Q17	R17	S17	T17	U17	V17	W17	X17	Y17	Z17				Sum of them		LDV	4296.21	4546.78	4753.78	5116.42	5569.14	5990.98	6457.71	6963.75	7511.91	8091.06	8699.85
Region	Year										Bus (Bus Calc sheet)	P17	Q17	R17	S17	T17	U17	V17	W17	X17	Y17	Z17						Bus	516.017	523.976	511.665	535.166	529.591	524.829	519.016	518.021	514.426	515.511	513.3
	2000	2005	2010	2015	2020	2025	2030				2W (2W Calc sheet)	P17	Q17	R17	S17	T17	U17	V17	W17	X17	Y17	Z17						2W	109.003	123.222	120.565	224.783	249.343	274.768	302.293	332.219	364.958	398.662	434.573
United states	2255	2519	2258	2409	2565	2722	2892				3W																	3W	0	0	0	0	0	0	0	0	0	0	0
Canada	323	352	300	317	335	352	371				Passenger Rail (Passenger Rail sheet)	P157	Q157	R157	S157	T157	U157	V157	W157	X157	Y157	Z157						Passenger Rail	447.775	459.024	475.994	508.17	537.76	564.164	591.479	619.116	646.279	671.969	694.913
Mexico	28	32	36	40	44	47	52																			Total (rail+road)		Total	5369	5653	5862	6384.54	6885.83	7354.74	7870.49	8433.11	9037.57	9677.21	10342.6
Brazil	155	221	297	304	317	334	358																	Sum except passenger rail				Total road	4921.23	5193.98	5386.01	5876.37	6348.07	6790.58	7279.02	7813.99	8391.29	9005.24	9647.72
																												3W share [%]	0	0	0	0	0	0	0	0	0	0	0
																												2W share [%]	0.0221495	0.023724	0.0223848	0.038252	0.0392786	0.0404631	0.0415293	0.0425159	0.0434925	0.04427	0.0450441
																												2w/3w share [%]	0.0221495	0.023724	0.0223848	0.038252	0.0392786	0.0404631	0.0415293	0.0425159	0.0434925	0.04427	0.0450441
																												LDV share [%]	0.872995	0.875394	0.882616	0.870677	0.877296	0.882249	0.887168	0.89119	0.895203	0.898484	0.901752
Rest of Latin America	69	72	80	88	97	107	118																					Bus share [%]	0.104855	0.100881	0.0949989	0.0910708	0.0834255	0.0772878	0.071303	0.0662941	0.0613048	0.0572457	0.0532042
EU-27	502	499	436	430	432	433	435			EU-27		FREIGHT ACTIVITY BY MODE (billion tonne-km)																FREIGHT ACTIVITY BY MODE (billion tonne-km)
Russia	1321	1838	1864	1936	2018	2105	2208				Mode	2000	2005	2010	2015	2020	2025	2030	2035	2040	2045	2050				EU-27		Mode	2000	2005	2010	2015	2020	2025	2030	2035	2040	2045	2050
Rest of Europe	166	200	231	252	275	299	327				LHDT (LHDT Calc)	P17	Q17	R17	S17	T17	U17	V17	W17	X17	Y17	Z17				Total road		LHDT	50.3797	56.2842	61.7222	61.5056	61.8581	66.1865	70.6931	75.763	81.4124	87.6463	94.4707
China	1351	1946	2736	2936	3387	3781	4302				MHDT (MHDT Calc)	P17	Q17	R17	S17	T17	U17	V17	W17	X17	Y17	Z17						MHDT	145.345	162.38	178.068	194.055	209.689	225.182	242.32	261.194	282.259	305.086	329.621
Japan	22	23	21	21	21	21	20				HHDT (HHDT Calc)	P17	Q17	R17	S17	T17	U17	V17	W17	X17	Y17	Z17						HHDT	1836.59	2051.84	2250.08	2439.18	2620.76	2795.73	2993.85	3209.67	3450.18	3710.84	3996.01
India	316	455	669	993	1303	1515	1687				Freight Rail (Freight Rail SHEET)	P157	Q157	R157	S157	T157	U157	V157	W157	X157	Y157	Z157						Freight Rail	501.824	499.264	436.011	430.211	432.308	433.355	434.763	443.695	453.136	467.926	482.622
South Korea	11	12	9	14	19	21	24																			Total (rail+road)		Total	2534.14	2769.77	2925.88	3124.95	3324.61	3520.46	3741.63	3990.33	4266.99	4571.49	4902.72
Australia	137	189	226	239	250	256	263																	Sum except passenger rail				Total road	2032.32	2270.51	2489.87	2694.74	2892.3	3087.1	3306.87	3546.63	3813.86	4103.57	4420.1
Rest of Asia-Pacific	546	683	828	880	943	1010	1093																					LHDT+MHDT share [%]	0.0963064	0.0963064	0.0963064	0.0948371	0.0938859	0.0943826	0.0946556	0.0950077	0.0953554	0.0957049	0.0959461
Middle East	30	34	41	51	61	75	91																					LDT share [%]	0.0247893	0.0247893	0.0247893	0.0228244	0.0213871	0.0214397	0.0213777	0.021362	0.0213465	0.0213585	0.021373
Africa	109	123	145	155	168	180	194																					MDT share [%]	0.0715171	0.0715171	0.0715171	0.0720127	0.0724988	0.0729429	0.0732779	0.0736457	0.0740089	0.0743464	0.0745731
Global	7341	9198	10177	11065	12235	13258	14435																					HDT share [%]	0.903694	0.903694	0.903694	0.905163	0.906114	0.905617	0.905344	0.904992	0.904645	0.904295	0.904054
										Russia		PASSENGER ACTIVITY BY MODE (billion passenger-km)														Russia		PASSENGER ACTIVITY BY MODE (billion passenger-km)
											Mode	2000	2005	2010	2015	2020	2025	2030	2035	2040	2045	2050						Mode	2000	2005	2010	2015	2020	2025	2030	2035	2040	2045	2050
Total Aviation activity											LDV (LDV Calc sheet)	P18	Q18	R18	S18	T18	U18	V18	W18	X18	Y18	Z18				Sum of them		LDV	456.68	562.671	720.551	923.718	1168.23	1419.69	1699.9	1990.69	2269.89	2514.88	2704.27
	ANNUAL AVIATION ACTIVITY (billion revenue passenger-km)										Bus (Bus Calc sheet)	P18	Q18	R18	S18	T18	U18	V18	W18	X18	Y18	Z18						Bus	191.003	142.015	118.047	132.729	132.145	128.346	124.335	120.344	116.33	111.916	106.683
Region	Year										2W (2W Calc sheet)	P18	Q18	R18	S18	T18	U18	V18	W18	X18	Y18	Z18						2W	30.7082	32.2904	35.672	44.2331	53.2851	62.3457	72.0945	81.8908	91.1828	99.129	104.947
	2000	2005	2010	2015	2020	2025	2030				3W																	3W	0	0	0	0	0	0	0	0	0	0	0
Global	3037	3924	4602	5629	6866	8434	10665				Passenger Rail (Passenger Rail sheet)	P158	Q158	R158	S158	T158	U158	V158	W158	X158	Y158	Z158						Passenger Rail	239.1	229.1	201.3	253.431	311.679	370.788	436.628	504.919	570.42	627.643	671.383
																										Total (rail+road)		Total	917.492	966.076	1075.57	1354.11	1665.34	1981.17	2332.95	2697.84	3047.82	3353.57	3587.28
																								Sum except passenger rail				Total road	678.392	736.976	874.27	1100.68	1353.66	1610.38	1896.33	2192.92	2477.4	2725.93	2915.9
																												3W share [%]	0	0	0	0	0	0	0	0	0	0	0
																												2W share [%]	0.0452662	0.0438147	0.0408021	0.0401871	0.0393637	0.0387149	0.038018	0.0373433	0.0368058	0.0363653	0.0359913
																												2w/3w share [%]	0.0452662	0.0438147	0.0408021	0.0401871	0.0393637	0.0387149	0.038018	0.0373433	0.0368058	0.0363653	0.0359913
																												LDV share [%]	0.673181	0.763486	0.824175	0.839225	0.863016	0.881586	0.896416	0.907778	0.916238	0.922579	0.927422
																												Bus share [%]	0.281553	0.192699	0.135023	0.120588	0.0976207	0.0796995	0.0655665	0.0548785	0.0469565	0.041056	0.0365868
VEHICLE STOCK BY MODE AND REGION										Russia		FREIGHT ACTIVITY BY MODE (billion tonne-km)														Russia		FREIGHT ACTIVITY BY MODE (billion tonne-km)
	LDV STOCK (million vehicles)										Mode	2000	2005	2010	2015	2020	2025	2030	2035	2040	2045	2050				Sum of them		Mode	2000	2005	2010	2015	2020	2025	2030	2035	2040	2045	2050
Region	Year										LHDT (LHDT Calc)	P18	Q18	R18	S18	T18	U18	V18	W18	X18	Y18	Z18						LHDT	5.72525	7.71505	8.58528	8.91665	9.29555	9.6958	10.1682	10.7023	11.2808	11.8818	12.4775
	2000	2005	2010	2015	2020	2025	2030				MHDT (MHDT Calc)	P18	Q18	R18	S18	T18	U18	V18	W18	X18	Y18	Z18						MHDT	57.5461	62.1264	56.0087	58.1705	60.6424	63.2535	66.3356	69.8199	73.5936	77.5145	81.4008
United states	212.7	231.9	230.5	240.4	264.4	277.4	291				HHDT (HHDT Calc)	P18	Q18	R18	S18	T18	U18	V18	W18	X18	Y18	Z18						HHDT	141.957	143.947	157.192	163.26	170.197	177.525	186.175	195.954	206.546	217.55	228.457
Canada	15.2	16.6	18.6	21.8	24.7	27.3	30.2				Freight Rail (Freight Rail SHEET)	P158	Q158	R158	S158	T158	U158	V158	W158	X158	Y158	Z158						Freight Rail	1320.77	1838.21	1864.23	1936.19	2018.46	2105.37	2207.96	2323.93	2449.54	2580.04	2709.4
Mexico	10.2	14.3	21.6	31.6	37.3	43.1	49.9																			Total (rail+road)		Total	1526	2052	2086.02	2166.53	2258.6	2355.85	2470.64	2600.41	2740.96	2886.99	3031.74
Brazil	17.8	21	28.2	33.3	41.4	54.4	64.3																	Sum except passenger rail				Total road	205.228	213.788	221.786	230.347	240.135	250.475	262.679	276.477	291.42	306.946	322.335
Rest of Latin America	14	15.2	19.6	24.6	29.9	35	41.3																					LHDT+MHDT share [%]	0.308298	0.326686	0.291244	0.291244	0.291244	0.291244	0.291244	0.291244	0.291244	0.291244	0.291244
EU-27	200.9	220.2	238.8	239	260.9	284.6	308.8																					LDT share [%]	0.027897	0.0360874	0.0387097	0.0387097	0.0387097	0.0387097	0.0387097	0.0387097	0.0387097	0.0387097	0.0387097
Russia	20.4	25.6	33.7	51.7	67.9	85.3	105																					MDT share [%]	0.280401	0.290598	0.252535	0.252535	0.252535	0.252535	0.252535	0.252535	0.252535	0.252535	0.252535
Rest of Europe	20	25.6	33.7	51.7	67.9	85.3	105																					HDT share [%]	0.691702	0.673314	0.708756	0.708756	0.708756	0.708756	0.708756	0.708756	0.708756	0.708756	0.708756
China	8.5	19.2	58.6	75.2	136.8	201.9	265.5
Japan	52.4	57.1	58.3	55.3	55.9	56	55.8			Non-EU Europe		PASSENGER ACTIVITY BY MODE (billion passenger-km)														Non-EU Europe		PASSENGER ACTIVITY BY MODE (billion passenger-km)
India	6.1	10.3	14.8	28.5	49	72.3	103.5				Mode	2000	2005	2010	2015	2020	2025	2030	2035	2040	2045	2050						Mode	2000	2005	2010	2015	2020	2025	2030	2035	2040	2045	2050
South Korea	9.2	12.2	14.7	17	20.7	22.8	25.1				LDV (LDV Calc sheet)	P19	Q19	R19	S19	T19	U19	V19	W19	X19	Y19	Z19				Sum of them		LDV	373.085	411.605	462.747	576.582	697.457	823.683	999.259	1196.24	1410.71	1637.06	1865.92
Australia	9.7	10.7	12.4	14.7	16.9	18.1	19.4				Bus (Bus Calc sheet)	P19	Q19	R19	S19	T19	U19	V19	W19	X19	Y19	Z19						Bus	295.134	333.179	371.592	391.764	420.16	440.315	433.815	426.991	420.138	412.917	404.669
Rest of Asia-Pacific	21.1	29.3	40.1	50.6	64.4	79.9	101.8				2W (2W Calc sheet)	P19	Q19	R19	S19	T19	U19	V19	W19	X19	Y19	Z19						2W	15.7966	13.8972	18.9283	22.511	26.3984	30.3302	35.3533	40.9772	46.9007	52.9749	59.0512
Middle East	11.4	16.3	25.6	30.4	40.1	51.9	67.4				3W																	3W	0	0	0	0	0	0	0	0	0	0	0
Africa	14.4	17.8	21	24.4	27.6	39.9	32.7				Passenger Rail (Passenger Rail sheet)	P159	Q159	R159	S159	T159	U159	V159	W159	X159	Y159	Z159						Passenger Rail	109.782	126.491	142.958	158.545	174.996	189.946	205.672	221.196	235.286	246.356	252.428
Global	644	741.1	864.6	969.3	1176.7	1387.5	1621.4																			Total (rail+road)		Total	793.797	885.172	996.226	1149.4	1319.01	1484.27	1674.1	1885.41	2113.03	2349.31	2582.07
																								Sum except passenger rail				Total road	684.015	758.681	853.268	990.857	1144.02	1294.33	1468.43	1664.21	1877.75	2102.95	2329.64
																												3W share [%]	0	0	0	0	0	0	0	0	0	0	0
																												2W share [%]	0.0230939	0.0183176	0.0221833	0.0227188	0.0230752	0.0234332	0.0240756	0.0246226	0.0249771	0.0251907	0.0253478
																												2w/3w share [%]	0.0230939	0.0183176	0.0221833	0.0227188	0.0230752	0.0234332	0.0240756	0.0246226	0.0249771	0.0251907	0.0253478
																												LDV share [%]	0.545433	0.542527	0.542323	0.581902	0.609657	0.636379	0.680496	0.718805	0.751277	0.778458	0.800948
																												Bus share [%]	0.431473	0.439155	0.435493	0.395379	0.367268	0.340188	0.295428	0.256573	0.223746	0.196351	0.173704
										Non-EU Europe		FREIGHT ACTIVITY BY MODE (billion tonne-km)														Non-EU Europe		FREIGHT ACTIVITY BY MODE (billion tonne-km)
											Mode	2000	2005	2010	2015	2020	2025	2030	2035	2040	2045	2050				Sum of them		Mode	2000	2005	2010	2015	2020	2025	2030	2035	2040	2045	2050
VEHICLE STOCK BY MODE AND REGION											LHDT (LHDT Calc)	P19	Q19	R19	S19	T19	U19	V19	W19	X19	Y19	Z19						LHDT	6.29002	10.9589	18.0417	19.6658	21.4899	23.3263	25.5248	28.1197	31.1382	34.5949	38.4599
	BUS STOCK (million vehicles)										MHDT (MHDT Calc)	P19	Q19	R19	S19	T19	U19	V19	W19	X19	Y19	Z19						MHDT	28.4111	38.6655	44.0796	48.0476	52.5045	56.991	62.3626	68.7025	76.0774	84.5226	93.9657
Region	Year										HHDT (HHDT Calc)	P19	Q19	R19	S19	T19	U19	V19	W19	X19	Y19	Z19						HHDT	152.692	192.355	206.455	225.039	245.914	266.927	292.086	321.78	356.322	395.876	440.105
	2000	2005	2010	2015	2020	2025	2030				Freight Rail (Freight Rail SHEET)	P159	Q159	R159	S159	T159	U159	V159	W159	X159	Y159	Z159						Freight Rail	166.014	199.911	231.193	252.005	275.381	298.912	327.086	360.338	399.018	443.313	492.841
United states	0.8	0.9	0.9	0.8	0.9	0.9	0.9																			Total (rail+road)		Total	353.407	441.891	499.769	544.758	595.289	646.157	707.059	778.94	862.555	958.307	1065.37
Canada	0.1	0.1	0.1	0.1	0.1	0.1	0.1																	Sum except passenger rail				Total road	187.393	241.98	268.576	292.753	319.908	347.245	379.974	418.603	463.537	514.994	572.53
Mexico	0.2	0.3	0.4	0.3	0.4	0.4	0.4																					LHDT+MHDT share [%]	0.185178	0.205077	0.231299	0.231299	0.231299	0.231299	0.231299	0.231299	0.231299	0.231299	0.231299
Brazil	0.2	0.3	0.3	0.4	0.4	0.4	0.4																					LDT share [%]	0.0335659	0.0452885	0.0671753	0.0671753	0.0671753	0.0671753	0.0671753	0.0671753	0.0671753	0.0671753	0.0671753
Rest of Latin America	0.6	0.8	1.2	1.1	1.2	1.2	1.3																					MDT share [%]	0.151612	0.159788	0.164124	0.164124	0.164124	0.164124	0.164124	0.164124	0.164124	0.164124	0.164124
EU-27	0.8	0.8	0.8	1.1	1.1	1.1	1.1																					HDT share [%]	0.814822	0.794923	0.768701	0.768701	0.768701	0.768701	0.768701	0.768701	0.768701	0.768701	0.768701
Russia	0.6	0.8	0.9	0.7	0.7	0.7	0.7
Rest of Europe	0.4	0.4	0.5	0.4	0.5	0.5	0.5			China		PASSENGER ACTIVITY BY MODE (billion passenger-km)														China		PASSENGER ACTIVITY BY MODE (billion passenger-km)
China	2	2.1	2.6	2.4	2.8	3.1	3.5				Mode	2000	2005	2010	2015	2020	2025	2030	2035	2040	2045	2050						Mode	2000	2005	2010	2015	2020	2025	2030	2035	2040	2045	2050
Japan	0.2	0.2	0.2	0.2	0.2	0.2	0.1				LDV (LDV Calc sheet)	P20	Q20	R20	S20	T20	U20	V20	W20	X20	Y20	Z20				Sum of them		LDV	295.238	832.079	2068.77	3039.59	4388.92	5404.89	6647.19	8003.29	9463.04	10951.1	12253.5
India	0.5	0.5	0.7	1.1	1.4	1.7	2				Bus (Bus Calc sheet)	P20	Q20	R20	S20	T20	U20	V20	W20	X20	Y20	Z20						Bus	4155.54	5069.61	6090.43	7135.44	8469.32	9665.74	11263.1	13338.9	15766.3	18276.6	20584.8
South Korea	1.4	1.7	1.9	2.1	2.3	2.3	2.4				2W (2W Calc sheet)	P20	Q20	R20	S20	T20	U20	V20	W20	X20	Y20	Z20						2W	194.777	466.747	616.107	803.301	1088.03	1304.48	1523.96	1760.96	2001.69	2244.22	2450
Australia	0.1	0.1	0.1	0.1	0.1	0.1	0.1				3W																	3W	0	0	0	0	0	0	0	0	0	0	0
Rest of Asia-Pacific	1.6	2.2	2.6	2.6	2.8	2.9	3.2				Passenger Rail (Passenger Rail sheet)	P160	Q160	R160	S160	T160	U160	V160	W160	X160	Y160	Z160						Passenger Rail	354.664	521.565	718.696	842.386	1003.35	1126.29	1266.95	1412.33	1539.44	1615.59	1606.57
Middle East	0.3	0.5	0.9	1	1.1	1.3	1.5																			Total (rail+road)		Total	5000.22	6890	9494	11820.7	14949.6	17501.4	20701.2	24515.5	28770.5	33087.6	36894.9
Africa	1.3	1.5	1.6	1.7	1.8	1.9	2																	Sum except passenger rail				Total road	4645.56	6368.44	8775.3	10978.3	13946.3	16375.1	19434.3	23103.1	27231.1	31472	35288.3
																												3W share [%]	0	0	0	0	0	0	0	0	0	0	0
																												2W share [%]	0.0419275	0.0732907	0.0702092	0.0731716	0.0780158	0.0796626	0.0784163	0.0762215	0.0735074	0.0713085	0.0694281
																												2w/3w share [%]	0.0419275	0.0732907	0.0702092	0.0731716	0.0780158	0.0796626	0.0784163	0.0762215	0.0735074	0.0713085	0.0694281
																												LDV share [%]	0.0635527	0.130657	0.235749	0.276872	0.314702	0.330067	0.342034	0.346416	0.347509	0.347965	0.347241
Global	11.2	13.1	15.6	16.1	17.6	18.9	20.3																					Bus share [%]	0.89452	0.796052	0.694042	0.649957	0.607282	0.59027	0.57955	0.577363	0.578984	0.580727	0.583331
										China		FREIGHT ACTIVITY BY MODE (billion tonne-km)														China		FREIGHT ACTIVITY BY MODE (billion tonne-km)
											Mode	2000	2005	2010	2015	2020	2025	2030	2035	2040	2045	2050				Sum of them		Mode	2000	2005	2010	2015	2020	2025	2030	2035	2040	2045	2050
											LHDT (LHDT Calc)	P20	Q20	R20	S20	T20	U20	V20	W20	X20	Y20	Z20						LHDT	172.908	218.898	324.263	391.753	470.72	532.252	608.807	701.165	807.739	922.593	1034.26
VEHICLE STOCK BY MODE AND REGION											MHDT (MHDT Calc)	P20	Q20	R20	S20	T20	U20	V20	W20	X20	Y20	Z20						MHDT	192.729	185.205	218.406	263.863	317.051	358.496	410.059	472.267	544.049	621.408	696.618
	MOTORCYCLE STOCK (million vehicles)										HHDT (HHDT Calc)	P20	Q20	R20	S20	T20	U20	V20	W20	X20	Y20	Z20						HHDT	273.188	591.614	1199.21	1448.81	1740.85	1968.41	2251.53	2593.1	2987.24	3412	3824.95
Region	Year										Freight Rail (Freight Rail SHEET)	P160	Q160	R160	S160	T160	U160	V160	W160	X160	Y160	Z160						Freight Rail	1351.18	1946.28	2735.72	3055.56	3528.87	3940.79	4484.3	5182	6050.88	7092.67	8283.14
	2000	2005	2010	2015	2020	2025	2030																			Total (rail+road)		Total	1990	2942	4477.6	5159.98	6057.49	6799.95	7754.69	8948.53	10389.9	12048.7	13839
United states	4	6	8	7	8	8	9																	Sum except passenger rail				Total road	638.824	995.717	1741.88	2104.42	2528.62	2859.16	3270.4	3766.53	4339.03	4956	5555.83
Canada	0	0	1	1	1	1	1																					LHDT+MHDT share [%]	0.572359	0.405841	0.311542	0.311542	0.311542	0.311542	0.311542	0.311542	0.311542	0.311542	0.311542
Mexico	0	1	1	2	2	3	3																					LDT share [%]	0.270665	0.21984	0.186157	0.186157	0.186157	0.186157	0.186157	0.186157	0.186157	0.186157	0.186157
Brazil	3	6	11	13	14	16	17																					MDT share [%]	0.301693	0.186002	0.125385	0.125385	0.125385	0.125385	0.125385	0.125385	0.125385	0.125385	0.125385
Rest of Latin America	5	6	13	15	17	18	21																					HDT share [%]	0.427641	0.594159	0.688458	0.688458	0.688458	0.688458	0.688458	0.688458	0.688458	0.688458	0.688458
EU-27	23	30	35	35	38	42	46
Russia	6	6	6	13	16	19	22																			Japan		PASSENGER ACTIVITY BY MODE (billion passenger-km)
Rest of Europe	5	4	6	7	8	9	11			Japan		PASSENGER ACTIVITY BY MODE (billion passenger-km)																Mode	2000	2005	2010	2015	2020	2025	2030	2035	2040	2045	2050
China	38	76	100	179	240	287	336				Mode	2000	2005	2010	2015	2020	2025	2030	2035	2040	2045	2050				Sum of them		LDV	866.121	848.245	751.321	758.848	759.311	753.474	744.695	733.911	721.802	709.26	696.974
Japan	14	13	12	12	12	12	12				LDV (LDV Calc sheet)	P21	Q21	R21	S21	T21	U21	V21	W21	X21	Y21	Z21						Bus	87.1476	88.4004	80.5415	71.1096	63.9085	58.4386	52.9652	47.7814	43.0556	38.8965	35.3235
India	32	50	76	120	169	207	246				Bus (Bus Calc sheet)	P21	Q21	R21	S21	T21	U21	V21	W21	X21	Y21	Z21						2W	75.2334	68.9922	66.8985	65.924	64.7905	63.48	61.8871	60.0508	58.2115	56.4531	54.828
South Korea	2	2	2	2	2	2	2				2W (2W Calc sheet)	P21	Q21	R21	S21	T21	U21	V21	W21	X21	Y21	Z21						3W	0	0	0	0	0	0	0	0	0	0	0
Australia	0	0	1	0	0	1	1				3W																	Passenger Rail	384.47	391.275	393.863	392.601	389.151	383.621	376.678	368.876	360.692	352.602	344.941
Rest of Asia-Pacific	54	85	135	158	183	209	244				Passenger Rail (Passenger Rail sheet)	P161	Q161	R161	S161	T161	U161	V161	W161	X161	Y161	Z161				Total (rail+road)		Total	1412.97	1396.91	1292.62	1288.48	1277.16	1259.01	1236.22	1210.62	1183.76	1157.21	1132.07
Middle East	2	2	3	4	5	6	8																	Sum except passenger rail				Total road	1028.5	1005.64	898.761	895.882	888.01	875.392	859.547	841.744	823.069	804.609	787.126
																												3W share [%]	0	0	0	0	0	0	0	0	0	0	0
																												2W share [%]	0.0731485	0.0686054	0.0744341	0.0735856	0.0729615	0.072516	0.0719997	0.071341	0.0707249	0.0701621	0.0696559
																												2w/3w share [%]	0.0731485	0.0686054	0.0744341	0.0735856	0.0729615	0.072516	0.0719997	0.071341	0.0707249	0.0701621	0.0696559
																												LDV share [%]	0.842119	0.84349	0.835952	0.847041	0.85507	0.860727	0.86638	0.871894	0.876964	0.881496	0.885467
Africa	4	6	7	8	9	10	11																					Bus share [%]	0.0847325	0.0879048	0.0896138	0.0793738	0.0719682	0.066757	0.0616199	0.0567648	0.052311	0.0483421	0.0448766
Global	192	293	417	576	726	850	989			Japan		FREIGHT ACTIVITY BY MODE (billion tonne-km)														Japan		FREIGHT ACTIVITY BY MODE (billion tonne-km)
											Mode	2000	2005	2010	2015	2020	2025	2030	2035	2040	2045	2050				Sum of them		Mode	2000	2005	2010	2015	2020	2025	2030	2035	2040	2045	2050
											LHDT (LHDT Calc)	P21	Q21	R21	S21	T21	U21	V21	W21	X21	Y21	Z21						LHDT	10.2718	8.47722	7.7987	7.76521	7.67365	7.52689	7.3426	7.13552	6.91832	6.70362	6.50026
											MHDT (MHDT Calc)	P21	Q21	R21	S21	T21	U21	V21	W21	X21	Y21	Z21						MHDT	259.121	274.997	272.368	271.199	268.001	262.875	256.439	249.207	241.621	234.123	227.021
											HHDT (HHDT Calc)	P21	Q21	R21	S21	T21	U21	V21	W21	X21	Y21	Z21						HHDT	43.6245	51.4392	54.0079	53.7759	53.1419	52.1255	50.8493	49.4152	47.911	46.4242	45.0159
VEHICLE STOCK BY MODE AND REGION											Freight Rail (Freight Rail SHEET)	P161	Q161	R161	S161	T161	U161	V161	W161	X161	Y161	Z161						Freight Rail	22.119	22.9	21.3872	21.2953	21.0443	20.6418	20.1364	19.5685	18.9728	18.384	17.8264
	MOTORCYCLE STOCK (million vehicles)																									Total (rail+road)		Total	335.136	357.813	355.562	354.035	349.861	343.17	334.767	325.326	315.423	305.635	296.363
Region	Year																							Sum except passenger rail				Total road	313.017	334.913	334.175	332.74	328.817	322.528	314.631	305.758	296.451	287.251	278.537
	2000	2005	2010	2015	2020	2025	2030																					LHDT+MHDT share [%]	0.860632	0.84641	0.838384	0.838384	0.838384	0.838384	0.838384	0.838384	0.838384	0.838384	0.838384
United states	8	8	11	11	12	12	13																					LDT share [%]	0.0328156	0.0253117	0.0233372	0.0233372	0.0233372	0.0233372	0.0233372	0.0233372	0.0233372	0.0233372	0.0233372
Canada	3	3	3	3	4	4	4																					MDT share [%]	0.827816	0.821099	0.815047	0.815047	0.815047	0.815047	0.815047	0.815047	0.815047	0.815047	0.815047
Mexico	2	2	3	4	5	5	6																					HDT share [%]	0.139368	0.15359	0.161616	0.161616	0.161616	0.161616	0.161616	0.161616	0.161616	0.161616	0.161616
Brazil	1	1	1	3	3	3	4			India		PASSENGER ACTIVITY BY MODE (billion passenger-km)														India		PASSENGER ACTIVITY BY MODE (billion passenger-km)
Rest of Latin America	5	5	7	8	10	11	13				Mode	2000	2005	2010	2015	2020	2025	2030	2035	2040	2045	2050						Mode	2000	2005	2010	2015	2020	2025	2030	2035	2040	2045	2050
EU-27	27	31	34	38	40	43	45				LDV (LDV Calc sheet)	P22	Q22	R22	S22	T22	U22	V22	W22	X22	Y22	Z22				Sum of them		LDV	127.876	228.064	391.581	725.915	1191.63	1684.7	2331.18	2998.02	3962.62	5337.14	7711.47
Russia	4	5	5	6	6	7	7				Bus (Bus Calc sheet)	P22	Q22	R22	S22	T22	U22	V22	W22	X22	Y22	Z22						Bus	1325.06	1607.71	2098.54	3213.92	4360.96	5199.64	5980.01	6353.2	6978.92	7989.54	8483.18
Rest of Europe	4	5	6	6	6	7	8				2W (2W Calc sheet)	P22	Q22	R22	S22	T22	U22	V22	W22	X22	Y22	Z22						2W	351.856	557.803	865.785	1363.57	1906.96	2341.8	2790.76	3092.79	3569.81	4328.18	5933.59
China	7	10	14	13	16	18	20				3W																	3W	170.887	199.595	262.812	413.916	578.865	710.861	847.145	938.826	1083.63	1313.83	1801.16
Japan	19	18	16	19	19	19	18				Passenger Rail (Passenger Rail sheet)	P162	Q162	R162	S162	T162	U162	V162	W162	X162	Y162	Z162						Passenger Rail	434.19	535.278	776.131	1199.54	1645.56	1984.16	2312.35	2490.17	2762.4	3157.17	3677.94
India	2	2	4	6	9	11	14																			Total (rail+road)		Total	2409.87	3128.45	4394.85	6916.86	9683.98	11921.2	14261.4	15873	18357.4	22125.9	27607.3
South Korea	3	3	3	4	5	6	7																	Sum except passenger rail				Total road	1975.68	2593.17	3618.72	5717.32	8038.42	9937	11949.1	13382.8	15595	18968.7	23929.4
																												3W share [%]	0.086495	0.0769695	0.0726257	0.0723968	0.0720124	0.0715368	0.0708961	0.0701515	0.0694856	0.0692633	0.0752698
																												2W share [%]	0.178094	0.215104	0.239252	0.238498	0.237231	0.235665	0.233554	0.231101	0.228908	0.228175	0.247962
																												2w/3w share [%]	0.264589	0.292074	0.311878	0.310895	0.309244	0.307201	0.30445	0.301253	0.298393	0.297438	0.323232
																												LDV share [%]	0.0647251	0.0879479	0.10821	0.126968	0.148242	0.169538	0.195093	0.22402	0.254096	0.281366	0.322259
Australia	2	3	3	3	3	3	3																					Bus share [%]	0.670686	0.619978	0.579913	0.562138	0.542514	0.52326	0.500457	0.474727	0.447511	0.421196	0.354509
Rest of Asia-Pacific	9	12	16	17	20	23	27			India		FREIGHT ACTIVITY BY MODE (billion tonne-km)														India		FREIGHT ACTIVITY BY MODE (billion tonne-km)
Middle East	2	3	6	8	10	12	15				Mode	2000	2005	2010	2015	2020	2025	2030	2035	2040	2045	2050				Sum of them		Mode	2000	2005	2010	2015	2020	2025	2030	2035	2040	2045	2050
Africa	6	7	9	10	11	12	13				LHDT (LHDT Calc)	P22	Q22	R22	S22	T22	U22	V22	W22	X22	Y22	Z22						LHDT	26.533	34.7959	73.3483	126.499	192.596	255.463	327.045	404.266	506.495	614.227	721.788
Global	104	118	141	159	179	196	217				MHDT (MHDT Calc)	P22	Q22	R22	S22	T22	U22	V22	W22	X22	Y22	Z22						MHDT	38.1198	64.5343	130.092	224.361	341.593	453.096	580.056	717.018	898.332	1089.41	1280.18
											HHDT (HHDT Calc)	P22	Q22	R22	S22	T22	U22	V22	W22	X22	Y22	Z22						HHDT	295.985	457.506	739.447	1275.27	1941.62	2575.4	3297.05	4075.54	5106.13	6192.21	7276.57
											Freight Rail (Freight Rail SHEET)	P162	Q162	R162	S162	T162	U162	V162	W162	X162	Y162	Z162						Freight Rail	316.076	454.674	669.162	993.244	1302.87	1515.27	1687.07	1815.48	2006.28	2206.37	2460.32
																										Total (rail+road)		Total	676.714	1011.51	1612.05	2619.38	3778.68	4799.23	5891.22	7012.3	8517.24	10102.2	11738.9
Source	http://www.theicct.org/sites/default/files/publications/ICCT%20Roadmap%20Energy%20Report.pdf																							Sum except passenger rail				Total road	360.638	556.836	942.888	1626.13	2475.81	3283.96	4204.15	5196.82	6510.96	7895.85	9278.54
Source	Global Transportation Energy and Climate Roadmap																											LHDT+MHDT share [%]	0.179274	0.178383	0.215763	0.215763	0.215763	0.215763	0.215763	0.215763	0.215763	0.215763	0.215763
																												LDT share [%]	0.0735726	0.0624886	0.0777911	0.0777911	0.0777911	0.0777911	0.0777911	0.0777911	0.0777911	0.0777911	0.0777911
																												MDT share [%]	0.105701	0.115895	0.137972	0.137972	0.137972	0.137972	0.137972	0.137972	0.137972	0.137972	0.137972
																												HDT share [%]	0.820726	0.821617	0.784237	0.784237	0.784237	0.784237	0.784237	0.784237	0.784237	0.784237	0.784237
										South Korea		PASSENGER ACTIVITY BY MODE (billion passenger-km)														South Korea		PASSENGER ACTIVITY BY MODE (billion passenger-km)
											Mode	2000	2005	2010	2015	2020	2025	2030	2035	2040	2045	2050						Mode	2000	2005	2010	2015	2020	2025	2030	2035	2040	2045	2050
											LDV (LDV Calc sheet)	P23	Q23	R23	S23	T23	U23	V23	W23	X23	Y23	Z23				Sum of them		LDV	216.558	247.42	268.8	363.713	438.033	478.007	523.248	573.522	627.278	681.517	732.641
											Bus (Bus Calc sheet)	P23	Q23	R23	S23	T23	U23	V23	W23	X23	Y23	Z23						Bus	214.642	380.332	413.197	450.363	475.029	487.398	498.308	506.687	511.482	512.049	508.217
											2W (2W Calc sheet)	P23	Q23	R23	S23	T23	U23	V23	W23	X23	Y23	Z23						2W	4.36603	6.2645	6.80583	8.89699	10.4744	11.3179	12.2596	13.2896	14.3714	15.4411	16.4251
											3W																	3W	0	0	0	0	0	0	0	0	0	0	0
											Passenger Rail (Passenger Rail sheet)	P163	Q163	R163	S163	T163	U163	V163	W163	X163	Y163	Z163						Passenger Rail	48.9345	54.3836	59.0831	66.3506	71.0775	73.3452	75.3362	76.7823	77.3579	76.772	74.848
																										Total (rail+road)		Total	484.5	688.4	747.887	889.323	994.614	1050.07	1109.15	1170.28	1230.49	1285.78	1332.13
																								Sum except passenger rail				Total road	435.565	634.016	688.804	822.973	923.537	976.723	1033.82	1093.5	1153.13	1209.01	1257.28
																												3W share [%]	0	0	0	0	0	0	0	0	0	0	0
																												2W share [%]	0.0100238	0.00988065	0.00988065	0.0108108	0.0113416	0.0115876	0.0118586	0.0121533	0.0124629	0.0127717	0.013064
																												2w/3w share [%]	0.0100238	0.00988065	0.00988065	0.0108108	0.0113416	0.0115876	0.0118586	0.0121533	0.0124629	0.0127717	0.013064
																												LDV share [%]	0.497188	0.390242	0.390242	0.44195	0.4743	0.489399	0.506133	0.524484	0.543978	0.5637	0.582718
																												Bus share [%]	0.492788	0.599877	0.599877	0.547239	0.514358	0.499013	0.482009	0.463363	0.443559	0.423528	0.404218
										South Korea		FREIGHT ACTIVITY BY MODE (billion tonne-km)														South Korea		FREIGHT ACTIVITY BY MODE (billion tonne-km)
											Mode	2000	2005	2010	2015	2020	2025	2030	2035	2040	2045	2050				Sum of them		Mode	2000	2005	2010	2015	2020	2025	2030	2035	2040	2045	2050
											LHDT (LHDT Calc)	P23	Q23	R23	S23	T23	U23	V23	W23	X23	Y23	Z23						LHDT	1.84095	1.4366	1.74227	2.82832	3.69997	4.20578	4.76792	5.38607	6.05089	6.74194	7.43127
											MHDT (MHDT Calc)	P23	Q23	R23	S23	T23	U23	V23	W23	X23	Y23	Z23						MHDT	46.4405	46.6027	56.5185	91.7494	120.025	136.433	154.669	174.721	196.288	218.705	241.066
											HHDT (HHDT Calc)	P23	Q23	R23	S23	T23	U23	V23	W23	X23	Y23	Z23						HHDT	7.81854	8.71721	10.572	17.1621	22.4512	25.5204	28.9314	32.6823	36.7164	40.9096	45.0924
											Freight Rail (Freight Rail SHEET)	P163	Q163	R163	S163	T163	U163	V163	W163	X163	Y163	Z163						Freight Rail	10.8	15.4909	8.76197	14.2238	18.6073	21.151	23.9781	27.0868	30.4302	33.9055	37.3721
																										Total (rail+road)		Total	66.9	72.2474	77.5947	125.964	164.784	187.311	212.346	239.877	269.485	300.262	330.962
																								Sum except passenger rail				Total road	56.1	56.7565	68.8328	111.74	146.176	166.16	188.368	212.79	239.055	266.357	293.59
																												LHDT+MHDT share [%]	0.860632	0.84641	0.84641	0.84641	0.84641	0.84641	0.84641	0.84641	0.84641	0.84641	0.84641
																												LDT share [%]	0.0328156	0.0253117	0.0253117	0.0253117	0.0253117	0.0253117	0.0253117	0.0253117	0.0253117	0.0253117	0.0253117
																												MDT share [%]	0.827816	0.821099	0.821099	0.821099	0.821099	0.821099	0.821099	0.821099	0.821099	0.821099	0.821099
																												HDT share [%]	0.139368	0.15359	0.15359	0.15359	0.15359	0.15359	0.15359	0.15359	0.15359	0.15359	0.15359
										Australia		PASSENGER ACTIVITY BY MODE (billion passenger-km)														Australia		PASSENGER ACTIVITY BY MODE (billion passenger-km)
											Mode	2000	2005	2010	2015	2020	2025	2030	2035	2040	2045	2050						Mode	2000	2005	2010	2015	2020	2025	2030	2035	2040	2045	2050
											LDV (LDV Calc sheet)	P24	Q24	R24	S24	T24	U24	V24	W24	X24	Y24	Z24				Sum of them		LDV	238.355	260.031	263.576	324.619	371.56	396.716	425.321	457.411	492.758	531.089	572.149
											Bus (Bus Calc sheet)	P24	Q24	R24	S24	T24	U24	V24	W24	X24	Y24	Z24						Bus	17.772	19.3332	19.5967	20.4132	21.334	22.2831	23.1179	23.8385	24.4694	25.0288	25.51
											2W (2W Calc sheet)	P24	Q24	R24	S24	T24	U24	V24	W24	X24	Y24	Z24						2W	1.67266	1.82591	1.8508	2.22078	2.50222	2.66143	2.83738	3.03018	3.23897	3.46251	3.69908
											3W																	3W	0	0	0	0	0	0	0	0	0	0	0
											Passenger Rail (Passenger Rail sheet)	P164	Q164	R164	S164	T164	U164	V164	W164	X164	Y164	Z164						Passenger Rail	10.6427	11.6084	11.7666	13.7142	15.1886	16.0816	17.0211	17.995	18.9893	19.9858	20.9562
																										Total (rail+road)		Total	268.442	292.799	296.79	360.967	410.585	437.742	468.297	502.274	539.455	579.566	622.315
																								Sum except passenger rail				Total road	257.799	281.191	285.023	347.253	395.396	421.661	451.276	484.279	520.466	559.58	601.358
																												3W share [%]	0	0	0	0	0	0	0	0	0	0	0
																												2W share [%]	0.00648824	0.00649351	0.00649351	0.00639528	0.00632839	0.00631178	0.00628745	0.00625709	0.00622322	0.00618769	0.00615121
																												2w/3w share [%]	0.00648824	0.00649351	0.00649351	0.00639528	0.00632839	0.00631178	0.00628745	0.00625709	0.00622322	0.00618769	0.00615121
																												LDV share [%]	0.924574	0.924752	0.924752	0.93482	0.939716	0.940842	0.942485	0.944518	0.946762	0.949084	0.951428
																												Bus share [%]	0.0689376	0.0687548	0.0687548	0.0587848	0.0539561	0.0528461	0.0512279	0.0492246	0.0470143	0.0447278	0.0424207
										Australia		FREIGHT ACTIVITY BY MODE (billion tonne-km)														Australia		FREIGHT ACTIVITY BY MODE (billion tonne-km)
											Mode	2000	2005	2010	2015	2020	2025	2030	2035	2040	2045	2050				Sum of them		Mode	2000	2005	2010	2015	2020	2025	2030	2035	2040	2045	2050
											LHDT (LHDT Calc)	P24	Q24	R24	S24	T24	U24	V24	W24	X24	Y24	Z24						LHDT	5.60875	8.00159	9.84561	10.4274	10.8949	11.1593	11.4599	11.799	12.1768	12.5931	13.0486
											MHDT (MHDT Calc)	P24	Q24	R24	S24	T24	U24	V24	W24	X24	Y24	Z24						MHDT	26.3584	31.5357	32.4617	34.3798	35.9212	36.7929	37.7839	38.9021	40.1477	41.5204	43.0221
											HHDT (HHDT Calc)	P24	Q24	R24	S24	T24	U24	V24	W24	X24	Y24	Z24						HHDT	107.423	133.493	143.606	152.091	158.91	162.767	167.151	172.097	177.608	183.68	190.324
											Freight Rail (Freight Rail SHEET)	P164	Q164	R164	S164	T164	U164	V164	W164	X164	Y164	Z164						Freight Rail	136.903	189.033	226.037	239.394	250.127	256.196	263.097	270.883	279.557	289.115	299.572
																										Total (rail+road)		Total	276.293	362.063	411.95	436.292	455.853	466.915	479.492	493.681	509.489	526.909	545.966
																								Sum except passenger rail				Total road	139.39	173.03	185.913	196.899	205.727	210.719	216.395	222.798	229.932	237.794	246.394
																												LHDT+MHDT share [%]	0.229336	0.2285	0.227565	0.227565	0.227565	0.227565	0.227565	0.227565	0.227565	0.227565	0.227565
																												LDT share [%]	0.0402379	0.046244	0.0529581	0.0529581	0.0529581	0.0529581	0.0529581	0.0529581	0.0529581	0.0529581	0.0529581
																												MDT share [%]	0.189098	0.182256	0.174607	0.174607	0.174607	0.174607	0.174607	0.174607	0.174607	0.174607	0.174607
																												HDT share [%]	0.770664	0.7715	0.772435	0.772435	0.772435	0.772435	0.772435	0.772435	0.772435	0.772435	0.772435
										Asia Pacific-40 (other asia)		PASSENGER ACTIVITY BY MODE (billion passenger-km)														Asia Pacific-40 (other asia)		PASSENGER ACTIVITY BY MODE (billion passenger-km)
											Mode	2000	2005	2010	2015	2020	2025	2030	2035	2040	2045	2050						Mode	2000	2005	2010	2015	2020	2025	2030	2035	2040	2045	2050
											LDV (LDV Calc sheet)	P25	Q25	R25	S25	T25	U25	V25	W25	X25	Y25	Z25				Sum of them		LDV	332.903	462.954	605.32	755.751	930.448	1106.07	1342.91	1664.14	2099.83	2688.04	3472.92
											Bus (Bus Calc sheet)	P25	Q25	R25	S25	T25	U25	V25	W25	X25	Y25	Z25						Bus	1359.09	1788.79	2149.89	2272.37	2426.12	2589.89	2802.03	3078.32	3438.79	3909.01	4522.45
											2W (2W Calc sheet)	P25	Q25	R25	S25	T25	U25	V25	W25	X25	Y25	Z25						2W	294.054	463.825	734.499	853.339	992.912	1134.47	1323.76	1578.3	1920.64	2379.12	2986.83
											3W																	3W	107.319	145.218	148.91	161.655	176.902	192.654	213.29	240.564	276.845	325.385	390.759
											Passenger Rail (Passenger Rail sheet)	P165	Q165	R165	S165	T165	U165	V165	W165	X165	Y165	Z165						Passenger Rail	168.998	198.878	242.989	264.838	291.076	318.078	353.277	399.197	458.773	535.163	631.224
																										Total (rail+road)		Total	2262.36	3059.67	3881.61	4307.95	4817.45	5341.15	6035.27	6960.52	8194.87	9836.72	12004.2
																								Sum except passenger rail				Total road	2093.36	2860.79	3638.62	4043.11	4526.38	5023.07	5681.99	6561.32	7736.1	9301.56	11372.9
																												3W share [%]	0.0512663	0.0507614	0.0409249	0.0399828	0.0390824	0.0383539	0.0375379	0.036664	0.0357861	0.0349818	0.0343586
																												2W share [%]	0.14047	0.162132	0.201862	0.21106	0.219361	0.225851	0.232975	0.240546	0.248269	0.255776	0.262625
																												2w/3w share [%]	0.191736	0.212893	0.242787	0.251043	0.258444	0.264205	0.270513	0.27721	0.284056	0.290758	0.296984
																												LDV share [%]	0.159028	0.161827	0.16636	0.186923	0.205561	0.220197	0.236345	0.253629	0.271432	0.288988	0.305367
																												Bus share [%]	0.649236	0.625279	0.590853	0.562034	0.535995	0.515598	0.493142	0.469161	0.444512	0.420254	0.397649
										Asia Pacific-40 (other asia)		FREIGHT ACTIVITY BY MODE (billion tonne-km)														Asia Pacific-40 (other asia)		FREIGHT ACTIVITY BY MODE (billion tonne-km)
											Mode	2000	2005	2010	2015	2020	2025	2030	2035	2040	2045	2050				Sum of them		Mode	2000	2005	2010	2015	2020	2025	2030	2035	2040	2045	2050
											LHDT (LHDT Calc)	P25	Q25	R25	S25	T25	U25	V25	W25	X25	Y25	Z25						LHDT	31.9058	38.0072	45.6022	55.2238	66.0733	76.7264	90.5425	108.559	132.084	162.755	202.497
											MHDT (MHDT Calc)	P25	Q25	R25	S25	T25	U25	V25	W25	X25	Y25	Z25						MHDT	94.2353	117.487	131.74	159.535	190.878	221.654	261.567	313.615	381.577	470.182	584.992
											HHDT (HHDT Calc)	P25	Q25	R25	S25	T25	U25	V25	W25	X25	Y25	Z25						HHDT	199.629	244.177	261.199	316.31	378.453	439.472	518.607	621.801	756.551	932.226	1159.86
											Freight Rail (Freight Rail SHEET)	P165	Q165	R165	S165	T165	U165	V165	W165	X165	Y165	Z165						Freight Rail	545.972	683.046	828.06	880.508	943.446	1009.63	1093.41	1201.67	1344.04	1533.84	1789.79
																										Total (rail+road)		Total	871.742	1082.72	1266.6	1411.58	1578.85	1747.48	1964.12	2245.64	2614.25	3099	3737.14
																								Sum except passenger rail				Total road	325.77	399.671	438.541	531.069	635.405	737.852	870.717	1043.97	1270.21	1565.16	1947.35
																												LHDT+MHDT share [%]	0.387209	0.389054	0.404391	0.404391	0.404391	0.404391	0.404391	0.404391	0.404391	0.404391	0.404391
																												LDT share [%]	0.0979395	0.0950962	0.103986	0.103986	0.103986	0.103986	0.103986	0.103986	0.103986	0.103986	0.103986
																												MDT share [%]	0.289269	0.293958	0.300404	0.300404	0.300404	0.300404	0.300404	0.300404	0.300404	0.300404	0.300404
																												HDT share [%]	0.612791	0.610946	0.595609	0.595609	0.595609	0.595609	0.595609	0.595609	0.595609	0.595609	0.595609
										Middle East		PASSENGER ACTIVITY BY MODE (billion passenger-km)														Middle East		PASSENGER ACTIVITY BY MODE (billion passenger-km)
											Mode	2000	2005	2010	2015	2020	2025	2030	2035	2040	2045	2050						Mode	2000	2005	2010	2015	2020	2025	2030	2035	2040	2045	2050
											LDV (LDV Calc sheet)	P26	Q26	R26	S26	T26	U26	V26	W26	X26	Y26	Z26				Sum of them		LDV	384.254	507.038	701.175	903.211	1151.19	1447.82	1831.4	2322.09	2974.66	3902.26	5081.57
											Bus (Bus Calc sheet)	P26	Q26	R26	S26	T26	U26	V26	W26	X26	Y26	Z26						Bus	202.12	283.809	514.766	606.351	711.372	829.622	972.82	1147.65	1333.06	1453.84	1568.27
											2W (2W Calc sheet)	P26	Q26	R26	S26	T26	U26	V26	W26	X26	Y26	Z26						2W	11.857	16.2976	25.5683	32.0558	39.8962	49.149	60.9443	75.8727	95.0267	120.241	151.652
											3W																	3W	0	0	0	0	0	0	0	0	0	0	0
											Passenger Rail (Passenger Rail sheet)	P166	Q166	R166	S166	T166	U166	V166	W166	X166	Y166	Z166						Passenger Rail	13.0196	15.9684	18.0112	21.9817	26.6389	31.9657	38.4953	46.4168	55.9155	67.0932	79.8027
																										Total (rail+road)		Total	611.25	823.113	1259.52	1563.6	1929.1	2358.55	2903.66	3592.03	4458.66	5543.44	6881.3
																								Sum except passenger rail				Total road	598.23	807.145	1241.51	1541.62	1902.46	2326.59	2865.16	3545.61	4402.75	5476.34	6801.5
																												3W share [%]	0	0	0	0	0	0	0	0	0	0	0
																												2W share [%]	0.0198202	0.0201917	0.0205945	0.0207936	0.0209709	0.0211249	0.0212708	0.021399	0.0215835	0.0219565	0.0222968
																												2w/3w share [%]	0.0198202	0.0201917	0.0205945	0.0207936	0.0209709	0.0211249	0.0212708	0.021399	0.0215835	0.0219565	0.0222968
																												LDV share [%]	0.642317	0.628187	0.564776	0.585885	0.605107	0.622292	0.639195	0.65492	0.675638	0.712567	0.747125
																												Bus share [%]	0.337863	0.351621	0.414629	0.393321	0.373922	0.356583	0.339534	0.323681	0.302778	0.265476	0.230578
										Middle East		FREIGHT ACTIVITY BY MODE (billion tonne-km)														Middle East		FREIGHT ACTIVITY BY MODE (billion tonne-km)
											Mode	2000	2005	2010	2015	2020	2025	2030	2035	2040	2045	2050				Sum of them		Mode	2000	2005	2010	2015	2020	2025	2030	2035	2040	2045	2050
											LHDT (LHDT Calc)	P26	Q26	R26	S26	T26	U26	V26	W26	X26	Y26	Z26						LHDT	6.08829	8.39041	14.2152	18.1894	22.9337	28.4922	35.5259	44.4304	55.7271	70.065	88.1485
											MHDT (MHDT Calc)	P26	Q26	R26	S26	T26	U26	V26	W26	X26	Y26	Z26						MHDT	27.9286	33.727	46.5224	59.5291	75.0556	93.2471	116.267	145.409	182.38	229.304	288.486
											HHDT (HHDT Calc)	P26	Q26	R26	S26	T26	U26	V26	W26	X26	Y26	Z26						HHDT	79.6934	130.382	256.806	328.604	414.312	514.73	641.799	802.664	1006.75	1265.77	1592.46
											Freight Rail (Freight Rail SHEET)	P166	Q166	R166	S166	T166	U166	V166	W166	X166	Y166	Z166						Freight Rail	29.8958	34.1816	41.425	50.5491	61.4639	74.5235	91.3303	113.393	142.855	182.833	237.857
																										Total (rail+road)		Total	143.606	206.681	358.969	456.872	573.765	710.993	884.922	1105.9	1387.71	1747.97	2206.95
																								Sum except passenger rail				Total road	113.71	172.499	317.544	406.323	512.301	636.469	793.592	992.503	1244.85	1565.14	1969.1
																												LHDT+MHDT share [%]	0.299154	0.24416	0.191273	0.191273	0.191273	0.191273	0.191273	0.191273	0.191273	0.191273	0.191273
																												LDT share [%]	0.0535421	0.0486402	0.044766	0.044766	0.044766	0.044766	0.044766	0.044766	0.044766	0.044766	0.044766
																												MDT share [%]	0.245612	0.195519	0.146507	0.146507	0.146507	0.146507	0.146507	0.146507	0.146507	0.146507	0.146507
																												HDT share [%]	0.700846	0.75584	0.808727	0.808727	0.808727	0.808727	0.808727	0.808727	0.808727	0.808727	0.808727
										Africa		PASSENGER ACTIVITY BY MODE (billion passenger-km)														Africa		PASSENGER ACTIVITY BY MODE (billion passenger-km)
											Mode	2000	2005	2010	2015	2020	2025	2030	2035	2040	2045	2050						Mode	2000	2005	2010	2015	2020	2025	2030	2035	2040	2045	2050
											LDV (LDV Calc sheet)	P27	Q27	R27	S27	T27	U27	V27	W27	X27	Y27	Z27				Sum of them		LDV	278.952	323.66	374.479	435.52	492.72	534.755	584.234	642.59	711.689	794.042	892.995
											Bus (Bus Calc sheet)	P27	Q27	R27	S27	T27	U27	V27	W27	X27	Y27	Z27						Bus	830.755	936.116	1059.45	1142.76	1230.93	1311.99	1402.63	1504.33	1618.73	1747.59	1892.99
											2W (2W Calc sheet)	P27	Q27	R27	S27	T27	U27	V27	W27	X27	Y27	Z27						2W	24.0615	36.05	45.0636	50.3954	55.6184	59.8229	64.6644	70.2567	76.7422	84.3023	93.172
											3W																	3W	0	0	0	0	0	0	0	0	0	0	0
											Passenger Rail (Passenger Rail sheet)	P167	Q167	R167	S167	T167	U167	V167	W167	X167	Y167	Z167						Passenger Rail	17.6162	19.867	23.1326	25.3039	27.5193	29.4383	31.6116	34.0817	36.8982	40.1206	43.8226
																										Total (rail+road)		Total	1151.38	1315.69	1502.12	1653.98	1806.79	1936	2083.14	2251.26	2444.06	2666.06	2922.98
																								Sum except passenger rail				Total road	1133.77	1295.83	1478.99	1628.67	1779.27	1906.56	2051.53	2217.18	2407.16	2625.93	2879.15
																												3W share [%]	0	0	0	0	0	0	0	0	0	0	0
																												2W share [%]	0.0212226	0.0278201	0.0304692	0.0309426	0.0312591	0.0313773	0.0315201	0.0316875	0.0318808	0.0321037	0.0323609
																												2w/3w share [%]	0.0212226	0.0278201	0.0304692	0.0309426	0.0312591	0.0313773	0.0315201	0.0316875	0.0318808	0.0321037	0.0323609
																												LDV share [%]	0.24604	0.249772	0.253199	0.267408	0.276922	0.280481	0.28478	0.289823	0.295655	0.302385	0.310159
																												Bus share [%]	0.732738	0.722408	0.716332	0.70165	0.691818	0.688142	0.6837	0.678489	0.672464	0.665512	0.65748
										Africa		FREIGHT ACTIVITY BY MODE (billion tonne-km)														Africa		FREIGHT ACTIVITY BY MODE (billion tonne-km)
											Mode	2000	2005	2010	2015	2020	2025	2030	2035	2040	2045	2050				Sum of them		Mode	2000	2005	2010	2015	2020	2025	2030	2035	2040	2045	2050
											LHDT (LHDT Calc)	P27	Q27	R27	S27	T27	U27	V27	W27	X27	Y27	Z27						LHDT	25.1991	29.7179	33.732	38.3927	43.0238	46.9833	51.4376	56.4607	62.1397	68.576	75.8949
											MHDT (MHDT Calc)	P27	Q27	R27	S27	T27	U27	V27	W27	X27	Y27	Z27						MHDT	130.939	160.369	174.678	198.812	222.794	243.298	266.364	292.376	321.784	355.114	393.014
											HHDT (HHDT Calc)	P27	Q27	R27	S27	T27	U27	V27	W27	X27	Y27	Z27						HHDT	128.809	165.697	187.762	213.705	239.483	261.522	286.316	314.277	345.887	381.713	422.453
											Freight Rail (Freight Rail SHEET)	P167	Q167	R167	S167	T167	U167	V167	W167	X167	Y167	Z167						Freight Rail	108.915	123.222	144.921	155.494	167.66	180.486	194.247	209.033	224.911	241.897	259.983
																										Total (rail+road)		Total	393.862	479.006	541.092	606.404	672.961	732.29	798.365	872.146	954.722	1047.3	1151.34
																								Sum except passenger rail				Total road	284.947	355.784	396.171	450.91	505.301	551.804	604.118	663.113	729.811	805.403	891.362
																												LHDT+MHDT share [%]	0.547955	0.534277	0.526059	0.526059	0.526059	0.526059	0.526059	0.526059	0.526059	0.526059	0.526059
																												LDT share [%]	0.0884344	0.083528	0.0851449	0.0851449	0.0851449	0.0851449	0.0851449	0.0851449	0.0851449	0.0851449	0.0851449
																												MDT share [%]	0.45952	0.450749	0.440914	0.440914	0.440914	0.440914	0.440914	0.440914	0.440914	0.440914	0.440914
																												HDT share [%]	0.452045	0.465723	0.473941	0.473941	0.473941	0.473941	0.473941	0.473941	0.473941	0.473941	0.473941
																										Worldwide
															Aviation Sheet
																												TOTAL ANNUAL AVIATION TRAVEL ACTIVITY (billion revenue passenger-km)
											Region	2000	2005	2010	2015	2020	2025	2030	2035	2040	2045	2050						Region	2000	2005	2010	2015	2020	2025	2030	2035	2040	2045	2050
											U.S.	C288	D288	E288	F288	G288	H288	I288	J288	K288	L288	M288						U.S.	961.825	1244.7	1303.44	1502.31	1739.18	2030.35	2409.94	2826.33	3400.11	4048.23	4745.43
											Canada	C289	D289	E289	F289	G289	H289	I289	J289	K289	L289	M289						Canada	85.4756	99.68	118.378	142.76	170.349	201.91	243.326	289.734	353.887	427.789	509.137
											Mexico	C290	D290	E290	F290	G290	H290	I290	J290	K290	L290	M290						Mexico	100.771	118.185	135.599	163.527	195.13	231.282	278.723	331.882	405.367	490.02	583.201
											Brazil	C291	D291	E291	F291	G291	H291	I291	J291	K291	L291	M291						Brazil	89.9743	92.1469	94.3195	115.402	144.729	185.111	244.122	310.496	414.113	535.382	668.228
											Latin America-31	C292	D292	E292	F292	G292	H292	I292	J292	K292	L292	M292						Latin America-31	104.37	128.889	115.064	140.108	173.604	217.768	281.661	351.346	459.576	582.723	713.315
											EU-27	C293	D293	E293	F293	G293	H293	I293	J293	K293	L293	M293						EU-27	783.676	885.881	1079.16	1285.62	1520.41	1805.79	2194.09	2604.47	3225.7	3909.65	4613.26
											Russia	C294	D294	E294	F294	G294	H294	I294	J294	K294	L294	M294						Russia	56.6838	63.192	156.169	206.338	266.811	342.086	448.719	575.069	769.019	1006.45	1281.07
											Non-EU Europe	C295	D295	E295	F295	G295	H295	I295	J295	K295	L295	M295						Non-EU Europe	44.0874	165.619	99.6065	133.512	173.896	222.956	292.454	374.804	501.212	655.958	834.944
											China	C296	D296	E296	F296	G296	H296	I296	J296	K296	L296	M296						China	126.864	275	469.371	684.071	931.427	1215.09	1638.14	2104.84	2891.72	3795.36	4744.04
											Japan	C297	D297	E297	F297	G297	H297	I297	J297	K297	L297	M297						Japan	197.044	153.289	203.164	206.649	218.635	247.575	289.721	323.13	385.339	439.004	476.314
											India	C298	D298	E298	F298	G298	H298	I298	J298	K298	L298	M298						India	44.9872	46.302	179.221	244.925	335.839	475.151	694.733	968.117	1442.47	2053.26	2783.44
											South Korea	C299	D299	E299	F299	G299	H299	I299	J299	K299	L299	M299						South Korea	72.8792	69.292	66.8195	75.0255	84.6264	98.6173	118.764	136.315	167.289	196.134	218.996
											Australia	C300	D300	E300	F300	G300	H300	I300	J300	K300	L300	M300						Australia	29.6915	40	39.7774	44.6624	50.3777	58.7065	70.7	81.1475	99.5864	116.758	130.368
											Asia-Pacific-40	C301	D301	E301	F301	G301	H301	I301	J301	K301	L301	M301						Asia-Pacific-40	177.249	298.919	239.104	297.55	372.403	482.077	644.917	822.272	1120.97	1459.94	1810.82
											Middle East	C302	D302	E302	F302	G302	H302	I302	J302	K302	L302	M302						Middle East	91.7738	141.5	182.753	239.433	307.192	393.087	515.533	651.059	884.172	1156.87	1450.63
											Africa	C303	D303	E303	F303	G303	H303	I303	J303	K303	L303	M303						Africa	69.2802	101	120.399	147.29	180.969	226.855	299.032	379.933	503.575	645.811	799.108
																												Global	3036.63	3923.59	4602.34	5629.19	6865.58	8434.41	10664.6	13130.9	17024.1	21519.3	26362.3
											Global	C305	D305	E305	F305	G305	H305	I305	J305	K305	L305	M305						Global	3036.63	3923.59	4602.34	5629.19	6865.58	8434.41	10664.6	13130.9	17024.1	21519.3	26362.3
														LDV Input sheet
									CAR		AVERAGE ANNUAL DISTANCE TRAVELED PER VEHICLE (km)															CAR		AVERAGE ANNUAL DISTANCE TRAVELED PER VEHICLE (km)
											Region	2000	2005	2010	2015	2020	2025	2030	2035	2040	2045	2050						Region	2000	2005	2010	2015	2020	2025	2030	2035	2040	2045	2050
											U.S.	P56	Q56	R56	S56	T56	U56	V56	W56	X56	Y56	Z56						U.S.	19091.8	19080.4	20028.3	19837.9	19942.7	20770.8	21522.1	21457.1	21451	21445.6	21440.6
											Canada	P57	Q57	R57	S57	T57	U57	V57	W57	X57	Y57	Z57						Canada	18565	18585	17663	17405.9	17338	17278.1	17225.2	17178.7	17137.6	17101.4	17069.3
											Mexico	P58	Q58	R58	S58	T58	U58	V58	W58	X58	Y58	Z58						Mexico	11467	11467	11316	10624.3	10378.5	10156.7	9956.6	9776.87	9616.83	9475.92	9353.36
											Brazil	P59	Q59	R59	S59	T59	U59	V59	W59	X59	Y59	Z59						Brazil	14823	13457	13747	14017	14002	12125.4	11744.4	11412	11130.5	10897.5	10707.6
											Latin America-31	P60	Q60	R60	S60	T60	U60	V60	W60	X60	Y60	Z60						Latin America-31	14440	14136	13958	13319.5	12870.3	12468.6	12108.8	11787.8	11503.8	11255.5	11041.2
											EU-27	P61	Q61	R61	S61	T61	U61	V61	W61	X61	Y61	Z61						EU-27	13009.9	13009.9	13009.9	12814.3	12624.1	12372.2	12219.8	12122	12034.8	11959.8	11892
											Russia	P62	Q62	R62	S62	T62	U62	V62	W62	X62	Y62	Z62						Russia	10958	11792	12481	9924.36	9552.71	9239.53	8985.01	8782.78	8623.26	8496.83	8395.45
											Non-EU Europe	P63	Q63	R63	S63	T63	U63	V63	W63	X63	Y63	Z63						Non-EU Europe	12437	11183	10907	11564.9	11109.6	10696.4	10344.1	10056.2	9826.72	9645.26	9501.35
											China	P64	Q64	R64	S64	T64	U64	V64	W64	X64	Y64	Z64						China	28080	22079	19029	19300	15200	12650	11850	11825	11800	11775	11750
											Japan	P65	Q65	R65	S65	T65	U65	V65	W65	X65	Y65	Z65						Japan	13262	12016	11377	11377	11377	11377	11377	11377	11377	11377	11377
											India	P66	Q66	R66	S66	T66	U66	V66	W66	X66	Y66	Z66						India	9782	11044.4	11458.1	11458.1	11458.1	11458.1	11458.1	11458.1	11458.1	11458.1	11458.1
											South Korea	P67	Q67	R67	S67	T67	U67	V67	W67	X67	Y67	Z67						South Korea	15372	15372	15211	14655.5	14494.3	14360.9	14249.1	14154.5	14073.9	14004.6	13944.8
											Australia	P68	Q68	R68	S68	T68	U68	V68	W68	X68	Y68	Z68						Australia	14600	13900	13900	14482.2	14450.7	14422.8	14398.1	14376	14356.3	14338.7	14322.9
											Asia-Pacific-40	P69	Q69	R69	S69	T69	U69	V69	W69	X69	Y69	Z69						Asia-Pacific-40	9003	9224	9380	8950.23	8652.18	8291.12	7894.96	7495.88	7122.5	6793.96	6518.6
											Middle East	P70	Q70	R70	S70	T70	U70	V70	W70	X70	Y70	Z70						Middle East	18605	17521	15240	16482.3	15931.4	15463.1	15068.5	14740.4	14470.4	14249.7	14069.5
											Africa	P71	Q71	R71	R71	T71	U71	V71	W71	X71	Y71	Z71						Africa	10746	10288	9927	9927	9927	9927	9927	9927	9927	9927	9927
											Global																	Global	234242	224155	218632	216140	209309	203058	200329	197927	195910	194202	192769
											Global SUMPRODUCT	P73	Q73	R73	R73	T73	U73	V73	W73	X73	Y73	Z73						Global SUMPRODUCT	15993	15827.6	15885.9	15764.9	15138.7	14745	14585.9	14315	14056	13800.8	13545.2
														LDV Input sheet
									CAR		LOAD FACTOR (passengers/vehicle)															CAR		LOAD FACTOR (passengers/vehicle)
											Region	2000	2005	2010	2015	2020	2025	2030	2035	2040	2045	2050						Region	2000	2005	2010	2015	2020	2025	2030	2035	2040	2045	2050
											U.S.	P35	Q35	R35	S35	T35	U35	V35	W35	X35	Y35	Z35						U.S.	1.57	1.57	1.38	1.38	1.38	1.38	1.38	1.38	1.38	1.38	1.38
											Canada	P36	Q36	R36	S36	T36	U36	V36	W36	X36	Y36	Z36						Canada	1.6	1.65	1.63	1.63	1.63	1.63	1.63	1.63	1.63	1.63	1.63
											Mexico	P37	Q37	R37	S37	T37	U37	V37	W37	X37	Y37	Z37						Mexico	1.5	1.47	1.44	1.44	1.44	1.44	1.44	1.44	1.44	1.44	1.44
											Brazil	P38	Q38	R38	S38	T38	U38	V38	W38	X38	Y38	Z38						Brazil	1.8073	1.77115	1.8	1.8	1.8	1.8	1.8	1.8	1.8	1.8	1.8
											Latin America-31	P39	Q39	R39	S39	T39	U39	V39	W39	X39	Y39	Z39						Latin America-31	1.8073	1.77115	1.8	1.8	1.8	1.8	1.8	1.8	1.8	1.8	1.8
											EU-27	P40	Q40	R40	S40	T40	U40	V40	W40	X40	Y640	Z40						EU-27	1.643	1.61014	1.65	1.67	1.69	1.7	1.71	1.71	1.71	1.71	1.71
											Russia	P41	Q41	R41	S41	T41	U41	V41	W41	X41	Y41	Z41						Russia	1.8	1.8	1.8	1.8	1.8	1.8	1.8	1.8	1.8	1.8	1.8
											Non-EU Europe	P42	Q42	R42	S42	T42	U42	V42	W42	X42	Y42	Z642						Non-EU Europe	1.64	1.61	1.62	1.62	1.62	1.62	1.62	1.62	1.62	1.62	1.62
											China	P43	Q43	R43	S43	T43	U43	V43	W43	X43	Y43	Z43						China	1.892	1.85416	1.85416	1.85416	1.85416	1.85416	1.85416	1.85416	1.85416	1.85416	1.85416
											Japan	P44	Q44	R44	S44	T44	U44	V44	W44	X44	Y44	Z44						Japan	1.24	1.23	1.22	1.22	1.22	1.22	1.22	1.22	1.22	1.22	1.22
											India	P45	Q45	R45	S45	T45	U45	V45	W45	X45	Y45	Z45						India	2.46429	2.43611	2.31264	2.22371	2.12318	2.03363	1.96605	1.90977	1.92664	1.98878	2.11713
											South Korea	P46	Q46	R46	S46	T46	U46	V46	W46	X46	Y46	Z46						South Korea	1.53	1.46	1.46	1.46	1.46	1.46	1.46	1.46	1.46	1.46	1.46
											Australia	P47	Q47	R47	S47	T47	U47	V47	W47	X47	Y47	Z47						Australia	1.72	1.6856	1.52	1.52	1.52	1.52	1.52	1.52	1.52	1.52	1.52
											Asia-Pacific-40	P48	Q48	R48	S48	T48	U48	V48	W48	X48	Y48	Z48						Asia-Pacific-40	1.892	1.85416	1.67	1.67	1.67	1.67	1.67	1.67	1.67	1.67	1.67
											Middle East	P49	Q49	R49	S49	T49	U49	V49	W49	X49	Y49	Z49						Middle East	1.8073	1.77115	1.8	1.8	1.8	1.8	1.8	1.8	1.8	1.8	1.8
											Africa	P50	Q50	R50	R50	T50	U50	V50	W50	X50	Y50	Z50						Africa	1.8073	1.77115	1.8	1.8	1.8	1.8	1.8	1.8	1.8	1.8	1.8
											Global	P52	Q52	R52	R52	T52	U52	V52	W52	X52	Y52	Z52						Global	1.61037	1.60867	1.57012	1.57356	1.57684	1.57794	1.57934	1.57857	1.5788	1.57965	1.58142
															Bus Input sheet
									BUS		AVERAGE ANNUAL DISTANCE TRAVELED PER VEHICLE (km)															BUS		AVERAGE ANNUAL DISTANCE TRAVELED PER VEHICLE (km)
											Region	2000	2005	2010	2015	2020	2025	2030	2035	2040	2045	2050						Region	2000	2005	2010	2015	2020	2025	2030	2035	2040	2045	2050
											U.S.	P56	Q56	R56	S56	T56	U56	V56	W56	X56	Y56	Z56						U.S.	30997	30997	30997	30997	30997	30997	30997	30997	30997	30997	30997
											Canada	P57	Q57	R57	S57	T57	U57	V57	W57	X57	Y57	Z57						Canada	43567	45186	39748	39748	39748	39748	39748	39748	39748	39748	39748
											Mexico	P58	Q58	R58	S58	T58	U58	V58	W58	X58	Y58	Z58						Mexico	47280	47833	48452	48452	48452	48452	48452	48452	48452	48452	48452
											Brazil	P59	Q59	R59	S59	T59	U59	V59	W59	X59	Y59	Z59						Brazil	114767	94511	79508	77012	77723	77723	77723	77723	77723	77723	77723
											Latin America-31	P60	Q60	R60	S60	T60	U60	V60	W60	X60	Y60	Z60						Latin America-31	50000	50000	50000	50000	50000	50000	50000	50000	50000	50000	50000
											EU-27	P61	Q61	R61	S61	T61	U61	V61	W61	X61	Y61	Z61						EU-27	32865	32865	32865	32234.4	32139.3	32036.2	32273.7	32830.8	33095.2	33422.7	33498.5
											Russia	P62	Q62	R62	S62	T62	U62	V62	W62	X62	Y62	Z62						Russia	56000	56000	56000	38000	38000	38000	38000	38000	38000	38000	38000
											Non-EU Europe	P63	Q63	R63	S63	T63	U63	V63	W63	X63	Y63	Z63						Non-EU Europe	59442	59437	59431	59431	59431	59431	59431	59431	59431	59431	59431
											China	P64	Q64	R64	S64	T64	U64	V64	W64	X64	Y64	Z64						China	101100	103550	106000	108500	111000	113000	116000	118250	120500	122750	125000
											Japan	P65	Q65	R65	S65	T65	U65	V65	W65	X65	Y65	Z65						Japan	28047	28664	28850	28850	28850	28850	28850	28850	28850	28850	28850
											India	P66	Q66	R66	S66	T66	U66	V66	W66	X66	Y66	Z66						India	84700	86990	89280	89280	89280	89280	89280	89280	89280	89280	89280
											South Korea	P67	Q67	R67	S67	T67	U67	V67	W67	X67	Y67	Z67						South Korea	23000	23000	23000	23000	23000	23000	23000	23000	23000	23000	23000
											Australia	P68	Q68	R68	S68	T68	U68	V68	W68	X68	Y68	Z68						Australia	31800	31900	29100	29100	29100	29100	29100	29100	29100	29100	29100
											Asia-Pacific-40	P69	Q69	R69	S69	T69	U69	V69	W69	X69	Y69	Z69						Asia-Pacific-40	50000	50000	50000	50000	50000	50000	50000	50000	50000	50000	50000
											Middle East	P70	Q70	R70	S70	T70	U70	V70	W70	X70	Y70	Z70						Middle East	50000	50000	50000	50000	50000	50000	50000	50000	50000	50000	50000
											Africa	P71	Q71	R71	R71	T71	U71	V71	W71	X71	Y71	Z71						Africa	50000	50000	50000	50000	50000	50000	50000	50000	50000	50000	50000
											Global	P73	Q73	R73	R73	T73	U73	V73	W73	X73	Y73	Z73						Global
															Bus Input sheet
									BUS		LOAD FACTOR (passengers/vehicle)															BUS		LOAD FACTOR (passengers/vehicle)
											Region	2000	2005	2010	2015	2020	2025	2030	2035	2040	2045							Region	2000	2005	2010	2015	2020	2025	2030	2035	2040	2045	2050
											U.S.	P35	Q35	R35	S35	T35	U35	V35	W35	X35	Y35	Z35						U.S.	25.47	22.34	20.34	20.34	20.34	20.34	20.34	20.34	20.34	20.34	20.34
											Canada	P36	Q36	R36	S36	T36	U36	V36	W36	X36	Y36	Z36						Canada	15.51	15.63	16.56	16.56	16.56	16.56	16.56	16.56	16.56	16.56	16.56
											Mexico	P37	Q37	R37	S37	T37	U37	V37	W37	X37	Y37	Z37						Mexico	30.1	29.35	29.35	29.3451	29.3451	29.3451	29.3451	29.3451	29.3451	29.3451	29.3451
											Brazil	P38	Q38	R38	S38	T38	U38	V38	W38	X38	Y38	Z38						Brazil	20	20	20	20	20	20	20	20	20	20	20
											Latin America-31	P39	Q39	R39	S39	T39	U39	V39	W39	X39	Y39	Z39						Latin America-31	19.29	18.79	18.64	18.64	18.64	18.64	18.64	18.64	18.64	18.64	18.64
											EU-27	P40	Q40	R40	S40	T40	U40	V40	W40	X40	Y640	Z40						EU-27	15	15	15	15	15	15	15	15	15	15	15
											Russia	P41	Q41	R41	S41	T41	U41	V41	W41	X41	Y41	Z41						Russia	14	7.5	4.8	4.8	4.8	4.8	4.8	4.8	4.8	4.8	4.8
											Non-EU Europe	P42	Q42	R42	S42	T42	U42	V42	W42	X42	Y42	Z642						Non-EU Europe	15	15	15	15	15	15	15	15	15	15	15
											China	P43	Q43	R43	S43	T43	U43	V43	W43	X43	Y43	Z43						China	25	24.38	24.38	24.38	24.38	24.38	24.38	24.38	24.38	24.38	24.38
											Japan	P44	Q44	R44	S44	T44	U44	V44	W44	X44	Y44	Z44						Japan	13.14	13.23	13.28	13.28	13.28	13.28	13.28	13.28	13.28	13.28	13.28
											India	P45	Q45	R45	S45	T45	U45	V45	W45	X45	Y45	Z45						India	33.75	33.75	33.75	33.75	33.75	33.75	33.75	33.75	33.75	33.75	33.75
											South Korea	P46	Q46	R46	S46	T46	U46	V46	W46	X46	Y46	Z46						South Korea	6.51	9.08	9.08	9.08	9.08	9.08	9.08	9.08	9.08	9.08	9.08
											Australia	P47	Q47	R47	S47	T47	U47	V47	W47	X47	Y47	Z47						Australia	9.91	9.63	9.33	9.33	9.33	9.33	9.33	9.33	9.33	9.33	9.33
											Asia-Pacific-40	P48	Q48	R48	S48	T48	U48	V48	W48	X48	Y48	Z48						Asia-Pacific-40	16.77	17.31	17.62	17.62	17.62	17.62	17.62	17.62	17.62	17.62	17.62
											Middle East	P49	Q49	R49	S49	T49	U49	V49	W49	X49	Y49	Z49						Middle East	12.07	12.29	12.58	12.58	12.58	12.58	12.58	12.58	12.58	12.58	12.58
											Africa	P50	Q50	R50	R50	T50	U50	V50	W50	X50	Y50	Z50						Africa	13.31	13.4	13.8	13.8	13.8	13.8	13.8	13.8	13.8	13.8	13.8
											Global	P52	Q52	R52	R52	T52	U52	V52	W52	X52	Y52	Z52						Global	19.6858	19.4348	19.4561	19.456	19.456	19.456	19.456	19.456	19.456	19.456	19.456
															MHDT Input sheet
									MHDT		AVERAGE ANNUAL DISTANCE TRAVELED PER VEHICLE (km)															MHDT		AVERAGE ANNUAL DISTANCE TRAVELED PER VEHICLE (km)
											Region	2000	2005	2010	2015	2020	2025	2030	2035	2040	2045	2050						Region	2000	2005	2010	2015	2020	2025	2030	2035	2040	2045	2050
											U.S.	P56	Q56	R56	S56	T56	U56	V56	W56	X56	Y56	Z56						U.S.	33542	34526	37638	37638	37638	37638	37638	37638	37638	37638	37638
											Canada	P57	Q57	R57	S57	T57	U57	V57	W57	X57	Y57	Z57						Canada	24920	23328	22652	22652	22652	22652	22652	22652	22652	22652	22652
											Mexico	P58	Q58	R58	S58	T58	U58	V58	W58	X58	Y58	Z58						Mexico	36000	36000	35000	35000	35000	35000	35000	35000	35000	35000	35000
											Brazil	P59	Q59	R59	S59	T59	U59	V59	W59	X59	Y59	Z59						Brazil	42373	33588	27344	29503	33227	33227	33227	33227	33227	33227	33227
											Latin America-31	P60	Q60	R60	S60	T60	U60	V60	W60	X60	Y60	Z60						Latin America-31	27500	27500	27500	27500	27500	27500	27500	27500	27500	27500	27500
											EU-27	P61	Q61	R61	S61	T61	U61	V61	W61	X61	Y61	Z61						EU-27	16335.2	16335.2	16335.2	16147	16005	15757.6	15724.4	15616.7	15543.2	15465.7	15410.4
											Russia	P62	Q62	R62	S62	T62	U62	V62	W62	X62	Y62	Z62						Russia	16786	18003	19061	19061	19061	19061	19061	19061	19061	19061	19061
											Non-EU Europe	P63	Q63	R63	S63	T63	U63	V63	W63	X63	Y63	Z63						Non-EU Europe	21411	22721	23552	23552	23552	23552	23552	23552	23552	23552	23552
											China	P64	Q64	R64	S64	T64	U64	V64	W64	X64	Y64	Z64						China	50761.9	51003	54068	54068	54068	54068	54068	54068	54068	54068	54068
											Japan	P65	Q65	R65	S65	T65	U65	V65	W65	X65	Y65	Z65						Japan	13213	13551	13821	13821	13821	13821	13821	13821	13821	13821	13821
											India	P66	Q66	R66	S66	T66	U66	V66	W66	X66	Y66	Z66						India	42000	44000	46000	46000	46000	46000	46000	46000	46000	46000	46000
											South Korea	P67	Q67	R67	S67	T67	U67	V67	W67	X67	Y67	Z67						South Korea	22505	21902	21960	21960	21960	21960	21960	21960	21960	21960	21960
											Australia	P68	Q68	R68	S68	T68	U68	V68	W68	X68	Y68	Z68						Australia	18900	21300	22600	22600	22600	22600	22600	22600	22600	22600	22600
											Asia-Pacific-40	P69	Q69	R69	S69	T69	U69	V69	W69	X69	Y69	Z69						Asia-Pacific-40	32445	31021	29992	29992	29992	29992	29992	29992	29992	29992	29992
											Middle East	P70	Q70	R70	S70	T70	U70	V70	W70	X70	Y70	Z70						Middle East	47667	45000	43167	43167	43167	43167	43167	43167	43167	43167	43167
											Africa	P71	Q71	R71	R71	T71	U71	V71	W71	X71	Y71	Z71						Africa	32132	32384	32161	32161	32161	32161	32161	32161	32161	32161	32161
											Global	P73	Q73	R73	R73	T73	U73	V73	W73	X73	Y73	Z73						Global
															MHDT Input sheet
									MHDT		PAYLOAD (metric tons/vehicle)															MHDT		PAYLOAD (metric tons/vehicle)
											Region	2000	2005	2010	2015	2020	2025	2030	2035	2040	2045	2050						Region	2000	2005	2010	2015	2020	2025	2030	2035	2040	2045	2050
											U.S.	P35	Q35	R35	S35	T35	U35	V35	W35	X35	Y35	Z35						U.S.	1.59	1.61	1.2	1.2	1.2	1.2	1.2	1.2	1.2	1.2	1.2
											Canada	P36	Q36	R36	S36	T36	U36	V36	W36	X36	Y36	Z36						Canada	1.23	1.27	1.27	1.27	1.27	1.27	1.27	1.27	1.27	1.27	1.27
											Mexico	P37	Q37	R37	S37	T37	U37	V37	W37	X37	Y37	Z37						Mexico	1.7	1.8	1.8	1.8	1.8	1.8	1.8	1.8	1.8	1.8	1.8
											Brazil	P38	Q38	R38	S38	T38	U38	V38	W38	X38	Y38	Z38						Brazil	1.8	1.8	1.8	1.8	1.8	1.8	1.8	1.8	1.8	1.8	1.8
											Latin America-31	P39	Q39	R39	S39	T39	U39	V39	W39	X39	Y39	Z39						Latin America-31	1.8	1.8	1.7	1.7	1.7	1.7	1.7	1.7	1.7	1.7	1.7
											EU-27	P40	Q40	R40	S40	T40	U40	V40	W40	X40	Y640	Z40						EU-27	1.62	1.62	1.62	1.63	1.63	1.64	1.64	1.64	1.64	1.64	1.64
											Russia	P41	Q41	R41	S41	T41	U41	V41	W41	X41	Y41	Z41						Russia	1.5	1.5	1.5	1.5	1.5	1.5	1.5	1.5	1.5	1.5	1.5
											Non-EU Europe	P42	Q42	R42	S42	T42	U42	V42	W42	X42	Y42	Z642						Non-EU Europe	1.4	1.5	1.5	1.5	1.5	1.5	1.5	1.5	1.5	1.5	1.5
											China	P43	Q43	R43	S43	T43	U43	V43	W43	X43	Y43	Z43						China	2.93	3.74	4.32	4.32	4.32	4.32	4.32	4.32	4.32	4.32	4.32
											Japan	P44	Q44	R44	S44	T44	U44	V44	W44	X44	Y44	Z44						Japan	1.2	1.38	1.47	1.47	1.47	1.47	1.47	1.47	1.47	1.47	1.47
											India	P45	Q45	R45	S45	T45	U45	V45	W45	X45	Y45	Z45						India	7	7.7	8.4	9.1	9.8	10.5	11.2	11.9	12.6	13.3	14
											South Korea	P46	Q46	R46	S46	T46	U46	V46	W46	X46	Y46	Z46						South Korea	1.4	1.3	1.3	1.3	1.3	1.3	1.3	1.3	1.3	1.3	1.3
											Australia	P47	Q47	R47	S47	T47	U47	V47	W47	X47	Y47	Z47						Australia	3.68	3.74	3.92	3.92	3.92	3.92	3.92	3.92	3.92	3.92	3.92
											Asia-Pacific-40	P48	Q48	R48	S48	T48	U48	V48	W48	X48	Y48	Z48						Asia-Pacific-40	1.9	1.8	1.7	1.7	1.7	1.7	1.7	1.7	1.7	1.7	1.7
											Middle East	P49	Q49	R49	S49	T49	U49	V49	W49	X49	Y49	Z49						Middle East	1.2	1.1	1.1	1.1	1.1	1.1	1.1	1.1	1.1	1.1	1.1
											Africa	P50	Q50	R50	R50	T50	U50	V50	W50	X50	Y50	Z50						Africa	2.1	2.2	2.2	2.2	2.2	2.2	2.2	2.2	2.2	2.2	2.2
											Global	P52	Q52	R52	R52	T52	U52	V52	W52	X52	Y52	Z52						Global	1.68887	1.798	1.8134	1.82594	1.83732	1.84985	1.86123	1.87261	1.88399	1.89537	1.90675
															HHDT Input sheet
									HHDT		AVERAGE ANNUAL DISTANCE TRAVELED PER VEHICLE (km)															HHDT		AVERAGE ANNUAL DISTANCE TRAVELED PER VEHICLE (km)
											Region	2000	2005	2010	2015	2020	2025	2030	2035	2040	2045	2050						Region	2000	2005	2010	2015	2020	2025	2030	2035	2040	2045	2050
											U.S.	P56	Q56	R56	S56	T56	U56	V56	W56	X56	Y56	Z56						U.S.	103620	111064	110890	110890	110890	110890	110890	110890	110890	110890	110890
											Canada	P57	Q57	R57	S57	T57	U57	V57	W57	X57	Y57	Z57						Canada	99814	89422	82863	82863	82863	82863	82863	82863	82863	82863	82863
											Mexico	P58	Q58	R58	S58	T58	U58	V58	W58	X58	Y58	Z58						Mexico	50000	47333	50000	50000	50000	50000	50000	50000	50000	50000	50000
											Brazil	P59	Q59	R59	S59	T59	U59	V59	W59	X59	Y59	Z59						Brazil	189654	156457	132060	88748	76243	76243	76243	76243	76243	76243	76243
											Latin America-31	P60	Q60	R60	S60	T60	U60	V60	W60	X60	Y60	Z60						Latin America-31	30000	30000	30000	30000	30000	30000	30000	30000	30000	30000	30000
											EU-27	P61	Q61	R61	S61	T61	U61	V61	W61	X61	Y61	Z61						EU-27	50130.4	50130.4	50130.4	49580.5	49141.2	48383.4	48352.8	48062.7	47836	47622.1	47449.6
											Russia	P62	Q62	R62	S62	T62	U62	V62	W62	X62	Y62	Z62						Russia	33780	36229	38358	38358	38358	38358	38358	38358	38358	38358	38358
											Non-EU Europe	P63	Q63	R63	S63	T63	U63	V63	W63	X63	Y63	Z63						Non-EU Europe	37259	40496	37109	37109	37109	37109	37109	37109	37109	37109	37109
											China	P64	Q64	R64	S64	T64	U64	V64	W64	X64	Y64	Z64						China	60000	65000	70000	70000	70000	70000	70000	70000	70000	70000	70000
											Japan	P65	Q65	R65	S65	T65	U65	V65	W65	X65	Y65	Z65						Japan	7046	7046	7046	7046	7046	7046	7046	7046	7046	7046	7046
											India	P66	Q66	R66	S66	T66	U66	V66	W66	X66	Y66	Z66						India	42000	44000	46000	46000	46000	46000	46000	46000	46000	46000	46000
											South Korea	P67	Q67	R67	S67	T67	U67	V67	W67	X67	Y67	Z67						South Korea	41767	39333	39000	39000	39000	39000	39000	39000	39000	39000	39000
											Australia	P68	Q68	R68	S68	T68	U68	V68	W68	X68	Y68	Z68						Australia	91300	90800	90800	90800	90800	90800	90800	90800	90800	90800	90800
											Asia-Pacific-40	P69	Q69	R69	S69	T69	U69	V69	W69	X69	Y69	Z69						Asia-Pacific-40	37853	34283	30483	30483	30483	30483	30483	30483	30483	30483	30483
											Middle East	P70	Q70	R70	S70	T70	U70	V70	W70	X70	Y70	Z70						Middle East	50000	47333	45500	45500	45500	45500	45500	45500	45500	45500	45500
											Africa	P71	Q71	R71	R71	T71	U71	V71	W71	X71	Y71	Z71						Africa	31620	33878	31767	31767	31767	31767	31767	31767	31767	31767	31767
											Global	P73	Q73	R73	R73	T73	U73	V73	W73	X73	Y73	Z73						Global
															HHDT Input sheet
									HHDT		PAYLOAD (metric tons/vehicle)															HHDT		PAYLOAD (metric tons/vehicle)
											Region	2000	2005	2010	2015	2020	2025	2030	2035	2040	2045	2050						Region	2000	2005	2010	2015	2020	2025	2030	2035	2040	2045	2050
											U.S.	P35	Q35	R35	S35	T35	U35	V35	W35	X35	Y35	Z35						U.S.	7.4	7.5	7.5	7.5	7.5	7.5	7.5	7.5	7.5	7.5	7.5
											Canada	P36	Q36	R36	S36	T36	U36	V36	W36	X36	Y36	Z36						Canada	5.43	7.78	7.32	7.32	7.32	7.32	7.32	7.32	7.32	7.32	7.32
											Mexico	P37	Q37	R37	S37	T37	U37	V37	W37	X37	Y37	Z37						Mexico	8.4	8.6	8.7	8.7	8.7	8.7	8.7	8.7	8.7	8.7	8.7
											Brazil	P38	Q38	R38	S38	T38	U38	V38	W38	X38	Y38	Z38						Brazil	8.8	8.9	8.8	8.8	8.8	8.8	8.8	8.8	8.8	8.8	8.8
											Latin America-31	P39	Q39	R39	S39	T39	U39	V39	W39	X39	Y39	Z39						Latin America-31	8.7	8.8	8.5	8.5	8.5	8.5	8.5	8.5	8.5	8.5	8.5
											EU-27	P40	Q40	R40	S40	T40	U40	V40	W40	X40	Y640	Z40						EU-27	8.62	8.62	8.62	8.64	8.66	8.67	8.68	8.68	8.68	8.68	8.68
											Russia	P41	Q41	R41	S41	T41	U41	V41	W41	X41	Y41	Z41						Russia	7.6	7.6	7.6	7.6	7.6	7.6	7.6	7.6	7.6	7.6	7.6
											Non-EU Europe	P42	Q42	R42	S42	T42	U42	V42	W42	X42	Y42	Z642						Non-EU Europe	7.1	7.4	7.4	7.4	7.4	7.4	7.4	7.4	7.4	7.4	7.4
											China	P43	Q43	R43	S43	T43	U43	V43	W43	X43	Y43	Z43						China	9.4	9	8.2	8.2	8.2	8.2	8.2	8.2	8.2	8.2	8.2
											Japan	P44	Q44	R44	S44	T44	U44	V44	W44	X44	Y44	Z44						Japan	3.47	3.82	3.87	3.87	3.87	3.87	3.87	3.87	3.87	3.87	3.87
											India	P45	Q45	R45	S45	T45	U45	V45	W45	X45	Y45	Z45						India	7	7.7	8.4	9.1	9.8	10.5	11.2	11.9	12.6	13.3	14
											South Korea	P46	Q46	R46	S46	T46	U46	V46	W46	X46	Y46	Z46						South Korea	6.8	6.5	6.3	6.3	6.3	6.3	6.3	6.3	6.3	6.3	6.3
											Australia	P47	Q47	R47	S47	T47	U47	V47	W47	X47	Y47	Z47						Australia	19.11	20.56	20.96	20.96	20.96	20.96	20.96	20.96	20.96	20.96	20.96
											Asia-Pacific-40	P48	Q48	R48	S48	T48	U48	V48	W48	X48	Y48	Z48						Asia-Pacific-40	9.4	9	8.2	8.2	8.2	8.2	8.2	8.2	8.2	8.2	8.2
											Middle East	P49	Q49	R49	S49	T49	U49	V49	W49	X49	Y49	Z49						Middle East	5.7	5.6	5.4	5.4	5.4	5.4	5.4	5.4	5.4	5.4	5.4
											Africa	P50	Q50	R50	R50	T50	U50	V50	W50	X50	Y50	Z50						Africa	9.4	9.6	9.4	9.4	9.4	9.4	9.4	9.4	9.4	9.4	9.4
											Global	P52	Q52	R52	R52	T52	U52	V52	W52	X52	Y52	Z52						Global	7.97174	8.18741	8.09215	8.15595	8.21976	8.28107	8.34238	8.4012	8.46002	8.51885	8.57767
															LDV Calc sheet
									TOTAL VEHICLE STOCK (million)			LDV														TOTAL VEHICLE STOCK (million)			LDV
											Region	2000	2005	2010	2015	2020	2025	2030	2035	2040	2045	2050						Region	2000	2005	2010	2015	2020	2025	2030	2035	2040	2045	2050
											U.S.	P54	Q54	R54	S54	T54	U54	V54	W54	X54	Y54	Z54						U.S.	212.7	231.9	230.5	239.831	263.778	276.802	290.368	314.531	337.363	359.153	379.582
											Canada	P55	Q55	R55	S55	T55	U55	V55	P55	P55	P55	P55						Canada	15.2	16.6	18.6	21.8074	24.7221	27.336	30.1789	33.1933	36.2886	39.3715	42.3598
											Mexico	P56	Q56	R56	S56	T56	U56	V56	P56	P56	P56	P56						Mexico	10.2	14.3	21.6	31.5857	37.3602	43.1132	49.9789	59.1774	71.6576	86.7291	104.532
											Brazil	P57	Q57	R57	S57	T57	U57	V57	P57	P57	P57	P57						Brazil	17.7756	20.9507	28.2212	37.296	43.517	57.5086	68.3722	81.3463	99.4049	120.909	145.465
											Latin America-31	P58	Q58	R58	S58	T58	U58	V58	P58	P58	P58	P58						Latin America-31	14	15.2	19.6	24.643	29.8851	35.0336	41.3537	49.116	58.6158	70.1636	84.7348
											EU-27	P59	Q59	R59	S59	T59	U59	V59	P59	P59	P59	P59						EU-27	200.9	220.2	238.8	239.086	261.036	284.841	309.043	335.948	365.018	395.628	427.819
											Russia	P60	Q60	R60	S60	T60	U60	VP60	P60	P60	P60	P60						Russia	20.353	25.57	33.73	51.7088	67.9405	85.3631	105.107	125.921	146.238	164.433	178.951
											Non-EU Europe	P61	Q61	R61	S61	T61	U61	V61	P61	P61	P61	P61						Non-EU Europe	20	23.5	28.1	30.7753	38.7529	47.5343	59.6308	73.4294	88.6163	104.77	121.225
											China	P62	Q62	R62	S62	T62	U62	V62	P62	P62	P62	P62						China	8.5	19.2	58.6	84.9393	155.728	230.435	302.532	365.022	432.514	501.592	562.439
											Japan	P63	Q63	R63	S63	T63	U63	V63	P63	P63	P63	P63						Japan	52.4	57.1	58.3	54.6723	54.7056	54.2851	53.6526	52.8757	52.0033	51.0996	50.2145
											India	P64	Q64	R64	S64	T64	U64	V64	P64	P64	P64	P64						India	6.143	10.32	14.7775	28.4903	48.9828	72.3002	103.483	137.007	179.503	234.212	317.892
											South Korea	P65	Q65	R65	S65	T65	U65	V65	P65	P65	P65	P65						South Korea	9.20773	12.2	14.7	16.9983	20.6994	22.7982	25.1518	27.7525	30.5277	33.3313	35.9853
											Australia	P66	Q66	R66	S66	T66	U66	V66	P66	P66	P66	P66						Australia	9.7	10.7	12.4	14.7467	16.9159	18.0961	19.4343	20.9327	22.5813	24.3677	26.2805
											Asia-Pacific-40	P67	Q67	R67	S67	T67	U67	V67	P67	P67	P67	P67						Asia-Pacific-40	21.1	29.3	40.1	50.5624	64.3947	79.8825	101.855	132.939	176.537	236.917	319.024
											Middle East	P68	Q68	R68	S68	T68	U68	V68	P68	P68	P68	P68						Middle East	11.4	16.3	25.6	30.4438	40.144	52.0169	67.521	87.5182	114.205	152.139	200.654
											Africa	P69	Q69	R69	S69	T69	U69	V69	P69	P69	P69	P69						Africa	14.4	17.8	21	24.3735	27.5746	29.9271	32.6961	35.962	39.829	44.4378	49.9756
											Global	P71	Q71	R71	S71	T71	U71	V71	W71	X71	Y71	Z71						Global	643.979	741.141	864.629	981.961	1196.14	1417.27	1660.36	1932.67	2250.9	2619.25	3047.13
															LDV Calc sheet
									TOTAL VEHICLE STOCK (million)			LDV														TOTAL VEHICLE STOCK (million)				BUS
											Region	2000	2005	2010	2015	2020	2025	2030	2035	2040	2045	2050						Region	2000	2005	2010	2015	2020	2025	2030	2035	2040	2045	2050
											U.S.	P54	Q54	R54	S54	T54	U54	V54	W54	X54	Y54	Z54						U.S.	0.8047	0.8693	0.9092	0.824664	0.847366	0.8686	0.886882	0.901829	0.913165	0.920576	0.924231
											Canada	P55	Q55	R55	S55	T55	U55	V55	P55	P55	P55	P55						Canada	0.0773	0.079	0.0856	0.0873413	0.0886958	0.090254	0.0914819	0.0922933	0.0927687	0.0930015	0.0930232
											Mexico	P56	Q56	R56	S56	T56	U56	V56	P56	P56	P56	P56						Mexico	0.2024	0.2688	0.3593	0.346256	0.376063	0.405233	0.439379	0.468874	0.487403	0.504271	0.518663
											Brazil	P57	Q57	R57	S57	T57	U57	V57	P57	P57	P57	P57						Brazil	0.229	0.2638	0.3281	0.363305	0.378687	0.399929	0.426644	0.460093	0.461222	0.456965	0.450194
											Latin America-31	P58	Q58	R58	S58	T58	U58	V58	P58	P58	P58	P58						Latin America-31	0.6486	0.82	1.155	1.08205	1.16465	1.24474	1.33933	1.45142	1.58468	1.74365	1.91774
											EU-27	P59	Q59	R59	S59	T59	U59	V59	P59	P59	P59	P59						EU-27	0.7768	0.7903	0.8186	1.10682	1.09853	1.09216	1.07211	1.0519	1.03626	1.02827	1.02154
											Russia	P60	Q60	R60	S60	T60	U60	VP60	P60	P60	P60	P60						Russia	0.64	0.792	0.894	0.727682	0.72448	0.703653	0.681663	0.659782	0.637775	0.613572	0.584888
											Non-EU Europe	P61	Q61	R61	S61	T61	U61	V61	P61	P61	P61	P61						Non-EU Europe	0.3775	0.4456	0.5121	0.439461	0.471314	0.493923	0.486631	0.478977	0.471289	0.463189	0.453937
											China	P62	Q62	R62	S62	T62	U62	V62	P62	P62	P62	P62						China	1.9527	2.1379	2.57	2.69747	3.12962	3.50851	3.98261	4.62685	5.36674	6.10718	6.75464
											Japan	P63	Q63	R63	S63	T63	U63	V63	P63	P63	P63	P63						Japan	0.2356	0.2317	0.2283	0.185603	0.166807	0.15253	0.138244	0.124714	0.112379	0.101523	0.0921977
											India	P64	Q64	R64	S64	T64	U64	V64	P64	P64	P64	P64						India	0.4635	0.5476	0.6965	1.06661	1.44728	1.72562	1.9846	2.10846	2.31611	2.65151	2.81534
											South Korea	P65	Q65	R65	S65	T65	U65	V65	P65	P65	P65	P65						South Korea	1.4335	1.7202	1.9494	2.1565	2.27461	2.33383	2.38608	2.4262	2.44916	2.45187	2.43352
											Australia	P66	Q66	R66	S66	T66	U66	V66	P66	P66	P66	P66						Australia	0.0667	0.0726	0.088	0.0751858	0.0785776	0.0820732	0.085148	0.0878019	0.0901256	0.0921861	0.0939585
											Asia-Pacific-40	P67	Q67	R67	S67	T67	U67	V67	P67	P67	P67	P67						Asia-Pacific-40	1.6499	2.154	2.567	2.5793	2.75382	2.93971	3.18051	3.49412	3.90328	4.43702	5.13331
											Middle East	P68	Q68	R68	S68	T68	U68	V68	P68	P68	P68	P68						Middle East	0.3485	0.4826	0.8598	0.963992	1.13096	1.31895	1.54661	1.82456	2.11933	2.31135	2.49328
											Africa	P69	Q69	R69	S69	T69	U69	V69	P69	P69	P69	P69						Africa	1.2941	1.4525	1.6116	1.65617	1.78396	1.90143	2.0328	2.18019	2.34598	2.53274	2.74346
											Global	P71	Q71	R71	S71	T71	U71	V71	W71	X71	Y71	Z71						Global	11.2008	13.1279	15.6325	16.3584	17.9154	19.2612	20.7607	22.438	24.3877	26.5089	28.5239
															LDV Calc sheet
									TOTAL VEHICLE STOCK (million)			LDV														TOTAL VEHICLE STOCK (million)				MDV	or	MHDT
											Region	2000	2005	2010	2015	2020	2025	2030	2035	2040	2045	2050						Region	2000	2005	2010	2015	2020	2025	2030	2035	2040	2045	2050
											U.S.	P54	Q54	R54	S54	T54	U54	V54	W54	X54	Y54	Z54						U.S.	3.37784	3.64529	4.6838	4.99947	5.32236	5.64977	6.002	6.37577	6.76671	7.1696	7.57923
											Canada	P55	Q55	R55	S55	T55	U55	V55	P55	P55	P55	P55						Canada	0.74934	0.70292	0.73593	0.773362	0.816441	0.856819	0.902561	0.953596	1.00926	1.06854	1.13025
											Mexico	P56	Q56	R56	S56	T56	U56	V56	P56	P56	P56	P56						Mexico	0.752537	0.791648	0.802526	0.50798	0.576004	0.641625	0.719016	0.810275	0.917682	1.04332	1.18859
											Brazil	P57	Q57	R57	S57	T57	U57	V57	P57	P57	P57	P57						Brazil	0.265306	0.257514	0.254528	0.256771	0.251182	0.267199	0.285847	0.307547	0.332763	0.361931	0.395234
											Latin America-31	P58	Q58	R58	S58	T58	U58	V58	P58	P58	P58	P58						Latin America-31	1.40658	1.47603	1.799	2.19769	2.56895	2.91631	3.33119	3.82807	4.42393	5.13859	5.99463
											EU-27	P59	Q59	R59	S59	T59	U59	V59	P59	P59	P59	P59						EU-27	5.00487	5.65516	6.33587	7.37304	8.0377	8.71363	9.39662	10.1983	11.073	12.0284	13.0424
											Russia	P60	Q60	R60	S60	T60	U60	VP60	P60	P60	P60	P60						Russia	1.44089	1.59241	1.77433	2.03454	2.12099	2.21232	2.32012	2.44198	2.57397	2.7111	2.84703
											Non-EU Europe	P61	Q61	R61	S61	T61	U61	V61	P61	P61	P61	P61						Non-EU Europe	1.18449	1.25843	1.19796	1.36004	1.4862	1.6132	1.76525	1.94471	2.15346	2.39251	2.65981
											China	P62	Q62	R62	S62	T62	U62	V62	P62	P62	P62	P62						China	2.27622	2.4	2.75	1.12968	1.35739	1.53483	1.75559	2.02192	2.32924	2.66044	2.98243
											Japan	P63	Q63	R63	S63	T63	U63	V63	P63	P63	P63	P63						Japan	15.3478	14.0892	13.0765	13.3484	13.1911	12.9388	12.622	12.266	11.8926	11.5236	11.174
											India	P64	Q64	R64	S64	T64	U64	V64	P64	P64	P64	P64						India	0.129659	0.190247	0.338276	0.53598	0.757749	0.938087	1.12589	1.30986	1.54992	1.78066	1.98786
											South Korea	P65	Q65	R65	S65	T65	U65	V65	P65	P65	P65	P65						South Korea	2.42185	2.64148	2.83471	3.21386	4.20433	4.77909	5.41785	6.12027	6.87571	7.66096	8.44425
											Australia	P66	Q66	R66	S66	T66	U66	V66	P66	P66	P66	P66						Australia	0.3426	0.3685	0.3944	0.388069	0.405468	0.415307	0.426494	0.439115	0.453176	0.46867	0.485621
											Asia-Pacific-40	P67	Q67	R67	S67	T67	U67	V67	P67	P67	P67	P67						Asia-Pacific-40	1.26295	1.7452	2.21881	3.12898	3.74371	4.34732	5.13014	6.15095	7.48391	9.22171	11.4735
											Middle East	P68	Q68	R68	S68	T68	U68	V68	P68	P68	P68	P68						Middle East	0.50909	0.65706	0.97198	1.25367	1.58066	1.96377	2.44856	3.06228	3.84089	4.8291	6.07548
											Africa	P69	Q69	R69	S69	T69	U69	V69	P69	P69	P69	P69						Africa	1.85966	2.22027	2.43866	2.8099	3.14885	3.43864	3.76464	4.13228	4.54791	5.01898	5.55464
											Global	P71	Q71	R71	S71	T71	U71	V71	W71	X71	Y71	Z71						Global	38.3316	39.6913	42.6072	45.3115	49.569	53.2267	57.4137	62.363	68.2241	75.0781	83.0149
															LDV Calc sheet
									TOTAL VEHICLE STOCK (million)			LDV														TOTAL VEHICLE STOCK (million)				HDV	or	HHDT
											Region	2000	2005	2010	2015	2020	2025	2030	2035	2040	2045	2050						Region	2000	2005	2010	2015	2020	2025	2030	2035	2040	2045	2050
											U.S.	P54	Q54	R54	S54	T54	U54	V54	W54	X54	Y54	Z54						U.S.	2.09662	2.08676	2.55287	2.13893	2.27707	2.41715	2.56784	2.72776	2.89501	3.06738	3.24263
											Canada	P55	Q55	R55	S55	T55	U55	V55	P55	P55	P55	P55						Canada	0.3015	0.33985	0.35325	0.371476	0.392168	0.411563	0.433535	0.458049	0.484786	0.513261	0.542903
											Mexico	P56	Q56	R56	S56	T56	U56	V56	P56	P56	P56	P56						Mexico	0.57118	0.598496	0.608754	0.447912	0.507891	0.565753	0.633993	0.71446	0.809167	0.919949	1.04804
											Brazil	P57	Q57	R57	S57	T57	U57	V57	P57	P57	P57	P57						Brazil	0.21302	0.35316	0.58287	0.990657	1.26352	1.34409	1.4379	1.54706	1.6739	1.82062	1.98815
											Latin America-31	P58	Q58	R58	S58	T58	U58	V58	P58	P58	P58	P58						Latin America-31	0.33462	0.38076	0.59643	0.715574	0.836456	0.949557	1.08464	1.24643	1.44044	1.67314	1.95186
											EU-27	P59	Q59	R59	S59	T59	U59	V59	P59	P59	P59	P59						EU-27	3.87288	4.36358	4.91321	5.69401	6.15834	6.66469	7.13328	7.69365	8.30937	8.97726	9.70228
											Russia	P60	Q60	R60	S60	T60	U60	VP60	P60	P60	P60	P60						Russia	0.96059	1.02622	1.1186	0.560027	0.583825	0.608963	0.638635	0.67218	0.708511	0.746258	0.783673
											Non-EU Europe	P61	Q61	R61	S61	T61	U61	V61	P61	P61	P61	P61						Non-EU Europe	0.68961	0.71912	0.80626	0.819498	0.895514	0.972035	1.06365	1.17179	1.29757	1.44161	1.60267
											China	P62	Q62	R62	S62	T62	U62	V62	P62	P62	P62	P62						China	0.773415	1.7	3.3	2.52405	3.03284	3.42929	3.92253	4.51759	5.20425	5.94424	6.66368
											Japan	P63	Q63	R63	S63	T63	U63	V63	P63	P63	P63	P63						Japan	2.58159	2.46844	2.30357	1.97212	1.94887	1.9116	1.86479	1.8122	1.75704	1.70251	1.65087
											India	P64	Q64	R64	S64	T64	U64	V64	P64	P64	P64	P64						India	1.00675	1.34603	1.92384	3.04652	4.30706	5.3321	6.39955	7.44527	8.80976	10.1213	11.299
											South Korea	P65	Q65	R65	S65	T65	U65	V65	P65	P65	P65	P65						South Korea	0.03185	0.0479	0.03728	0.0698497	0.0913763	0.103868	0.117751	0.133017	0.149436	0.166502	0.183526
											Australia	P66	Q66	R66	S66	T66	U66	V66	P66	P66	P66	P66						Australia	0.1145	0.1304	0.1463	0.0799149	0.0834979	0.085524	0.0878277	0.0904267	0.0933222	0.096513	0.100004
											Asia-Pacific-40	P67	Q67	R67	S67	T67	U67	V67	P67	P67	P67	P67						Asia-Pacific-40	0.63491	0.88532	1.1544	1.26544	1.51405	1.75816	2.07476	2.4876	3.02668	3.72949	4.64017
											Middle East	P68	Q68	R68	S68	T68	U68	V68	P68	P68	P68	P68						Middle East	0.28203	0.49187	1.03614	1.33742	1.68625	2.09495	2.61212	3.26685	4.09746	5.15169	6.48132
											Africa	P69	Q69	R69	S69	T69	U69	V69	P69	P69	P69	P69						Africa	0.4159	0.49478	0.59887	0.715665	0.801993	0.8758	0.958831	1.05247	1.15833	1.2783	1.41473
											Global	P71	Q71	R71	S71	T71	U71	V71	W71	X71	Y71	Z71						Global	14.881	17.4327	22.0326	22.7491	26.3807	29.5251	33.0316	37.0368	41.915	47.35	53.2955
															LDV Calc sheet
									TOTAL VEHICLE STOCK (million)			LDV														TOTAL VEHICLE STOCK (million)				LHDT
											Region	2000	2005	2010	2015	2020	2025	2030	2035	2040	2045	2050						Region	2000	2005	2010	2015	2020	2025	2030	2035	2040	2045	2050
											U.S.	P54	Q54	R54	S54	T54	U54	V54	W54	X54	Y54	Z54						U.S.	2.54819	2.74995	3.53339	3.75045	3.99267	4.23829	4.50252	4.78291	5.07618	5.37842	5.68571
											Canada	P55	Q55	R55	S55	T55	U55	V55	P55	P55	P55	P55						Canada	1.53366	1.82561	2.19566	2.24363	2.36861	2.48575	2.61846	2.76652	2.928	3.09999	3.27901
											Mexico	P56	Q56	R56	S56	T56	U56	V56	P56	P56	P56	P56						Mexico	1.02763	1.1034	1.10282	3.08999	3.50377	3.90293	4.3737	4.92881	5.58216	6.34641	7.23004
											Brazil	P57	Q57	R57	S57	T57	U57	V57	P57	P57	P57	P57						Brazil	0.487	0.505	0.542	0.626833	0.678401	0.721661	0.772026	0.830636	0.898738	0.977517	1.06746
											Latin America-31	P58	Q58	R58	S58	T58	U58	V58	P58	P58	P58	P58						Latin America-31	2.95699	3.30974	4.3905	5.40041	6.3127	7.16627	8.18576	9.40675	10.871	12.6271	14.7306
											EU-27	P59	Q59	R59	S59	T59	U59	V59	P59	P59	P59	P59						EU-27	18.2207	21.1584	22.8434	24.833	25.4083	27.7997	28.5056	30.4617	32.6337	35.0548	37.6969
											Russia	P60	Q60	R60	S60	T60	U60	VP60	P60	P60	P60	P60						Russia	2.00851	2.22937	2.43007	3.58653	3.73893	3.89992	4.08995	4.30478	4.53745	4.77919	5.0188
											Non-EU Europe	P61	Q61	R61	S61	T61	U61	V61	P61	P61	P61	P61						Non-EU Europe	1.67295	2.66356	3.82416	3.74843	4.09613	4.44615	4.86521	5.35982	5.93516	6.59402	7.33072
											China	P62	Q62	R62	S62	T62	U62	V62	P62	P62	P62	P62						China	4.11357	5.5	8.3	8.66326	10.4096	11.7703	13.4632	15.5056	17.8624	20.4023	22.8716
											Japan	P63	Q63	R63	S63	T63	U63	V63	P63	P63	P63	P63						Japan	1.38838	1.16488	0.95765	4.08175	4.03363	3.95648	3.85961	3.75076	3.63659	3.52373	3.41684
											India	P64	Q64	R64	S64	T64	U64	V64	P64	P64	P64	P64						India	0.65032	0.83907	1.6864	2.54729	3.87829	5.14424	6.58569	8.14069	10.1992	12.3686	14.5346
											South Korea	P65	Q65	R65	S65	T65	U65	V65	P65	P65	P65	P65						South Korea	0.2743	0.41244	0.32106	0.878962	1.14985	1.30704	1.48173	1.67384	1.88044	2.0952	2.30942
											Australia	P66	Q66	R66	S66	T66	U66	V66	P66	P66	P66	P66						Australia	1.7454	2.0303	2.3152	2.26682	2.36846	2.42593	2.49127	2.565	2.64713	2.73764	2.83665
											Asia-Pacific-40	P67	Q67	R67	S67	T67	U67	V67	P67	P67	P67	P67						Asia-Pacific-40	7.00526	9.24248	12.2587	12.1097	14.4888	16.8249	19.8545	23.8052	28.964	35.6896	44.4044
											Middle East	P68	Q68	R68	S68	T68	U68	V68	P68	P68	P68	P68						Middle East	1.56687	2.29217	4.00602	5.05262	6.37046	7.91449	9.86831	12.3418	15.4798	19.4625	24.4857
											Africa	P69	Q69	R69	S69	T69	U69	V69	P69	P69	P69	P69						Africa	3.85346	4.76708	5.78363	6.00411	6.72836	7.34757	8.04416	8.82972	9.71783	10.7244	11.869
											Global	P71	Q71	R71	S71	T71	U71	V71	W71	X71	Y71	Z71						Global	51.0532	61.7934	76.4906	88.8838	99.5269	111.352	123.562	139.455	158.85	181.861	208.767
															LDV Calc sheet
									TOTAL VEHICLE STOCK (million)			LDV														TOTAL VEHICLE STOCK (million)				2W
											Region	2000	2005	2010	2015	2020	2025	2030	2035	2040	2045	2050						Region	2000	2005	2010	2015	2020	2025	2030	2035	2040	2045	2050
											U.S.	P54	Q54	R54	S54	T54	U54	V54	W54	X54	Y54	Z54						U.S.	4.3461	6.2286	8.2	12.2388	13.3929	14.5103	15.6412	16.7593	17.8384	18.8544	19.7932
											Canada	P55	Q55	R55	S55	T55	U55	V55	P55	P55	P55	P55						Canada	0.3113	0.4437	0.5949	0.653584	0.725103	0.789084	0.857874	0.929857	1.00286	1.07472	1.14351
											Mexico	P56	Q56	R56	S56	T56	U56	V56	P56	P56	P56	P56						Mexico	0.29	0.5926	1.2029	2.02114	2.29782	2.56416	2.8799	3.28521	3.80935	4.42977	5.14925
											Brazil	P57	Q57	R57	S57	T57	U57	V57	P57	P57	P57	P57						Brazil	2.8922	5.8134	11.1272	12.9954	14.4033	15.5896	17.0858	18.9766	22.0125	25.9548	31.0621
											Latin America-31	P58	Q58	R58	S58	T58	U58	V58	P58	P58	P58	P58						Latin America-31	4.5178	6.4815	12.5202	14.5003	16.5581	18.4755	20.8066	23.6398	27.0725	31.2096	36.3278
											EU-27	P59	Q59	R59	S59	T59	U59	V59	P59	P59	P59	P59						EU-27	23.3674	29.7035	34.5563	34.9477	38.4428	42.1598	45.7344	49.9014	54.3786	59.0731	63.9989
											Russia	P60	Q60	R60	S60	T60	U60	VP60	P60	P60	P60	P60						Russia	6.302	6.15345	6.10011	13.404	16.147	18.8926	21.8468	24.8154	27.6312	30.0391	31.8021
											Non-EU Europe	P61	Q61	R61	S61	T61	U61	V61	P61	P61	P61	P61						Non-EU Europe	4.7905	4.2165	5.7357	6.82153	7.99951	9.19097	10.7131	12.4173	14.2123	16.053	17.8943
											China	P62	Q62	R62	S62	T62	U62	V62	P62	P62	P62	P62						China	37.7179	75.7866	100.005	130.406	176.628	211.767	247.397	285.87	324.949	364.322	397.727
											Japan	P63	Q63	R63	S63	T63	U63	V63	P63	P63	P63	P63						Japan	13.9738	13.1752	12.4774	11.9862	11.7801	11.5418	11.2522	10.9183	10.5839	10.2642	9.96872
											India	P64	Q64	R64	S64	T64	U64	V64	P64	P64	P64	P64						India	29.3	46.5	72.1	113.619	158.898	195.13	232.54	257.707	297.454	360.646	494.417
											South Korea	P65	Q65	R65	S65	T65	U65	V65	P65	P65	P65	P65						South Korea	1.80827	1.73543	1.82513	1.61764	1.90444	2.0578	2.22902	2.41629	2.61298	2.80746	2.98639
											Australia	P66	Q66	R66	S66	T66	U66	V66	P66	P66	P66	P66						Australia	0.3424	0.4219	0.679	0.429551	0.483989	0.514783	0.548816	0.586108	0.626494	0.669731	0.715489
											Asia-Pacific-40	P67	Q67	R67	S67	T67	U67	V67	P67	P67	P67	P67						Asia-Pacific-40	50.0887	80.2998	128.611	155.152	180.529	206.267	240.684	286.964	349.207	432.567	543.059
											Middle East	P68	Q68	R68	S68	T68	U68	V68	P68	P68	P68	P68						Middle East	1.5387	2.1135	3.3189	4.1631	5.18133	6.38298	7.91484	9.8536	12.3411	15.6158	19.695
											Africa	P69	Q69	R69	S69	T69	U69	V69	P69	P69	P69	P69						Africa	3.8356	5.8734	7.4991	8.37411	9.242	9.94066	10.7452	11.6744	12.7521	14.0084	15.4822
											Global	P71	Q71	R71	S71	T71	U71	V71	W71	X71	Y71	Z71						Global	185.423	285.539	406.553	523.331	654.614	765.774	888.876	1016.71	1178.48	1387.59	1691.22
															LDV Calc sheet
									TOTAL VEHICLE STOCK (million)			LDV														TOTAL VEHICLE STOCK (million)			3W
											Region	2000	2005	2010	2015	2020	2025	2030	2035	2040	2045	2050						Region	2000	2005	2010	2015	2020	2025	2030	2035	2040	2045	2050
											U.S.	P54	Q54	R54	S54	T54	U54	V54	W54	X54	Y54	Z54						U.S.	0	0	0	0	0	0	0	0	0	0	0
											Canada	P55	Q55	R55	S55	T55	U55	V55	P55	P55	P55	P55						Canada	0	0	0	0	0	0	0	0	0	0	0
											Mexico	P56	Q56	R56	S56	T56	U56	V56	P56	P56	P56	P56						Mexico	0	0	0	0	0	0	0	0	0	0	0
											Brazil	P57	Q57	R57	S57	T57	U57	V57	P57	P57	P57	P57						Brazil	0	0	0	0	0	0	0	0	0	0	0
											Latin America-31	P58	Q58	R58	S58	T58	U58	V58	P58	P58	P58	P58						Latin America-31	0	0	0	0	0	0	0	0	0	0	0
											EU-27	P59	Q59	R59	S59	T59	U59	V59	P59	P59	P59	P59						EU-27	0	0	0	0	0	0	0	0	0	0	0
											Russia	P60	Q60	R60	S60	T60	U60	VP60	P60	P60	P60	P60						Russia	0	0	0	0	0	0	0	0	0	0	0
											Non-EU Europe	P61	Q61	R61	S61	T61	U61	V61	P61	P61	P61	P61						Non-EU Europe	0	0	0	0	0	0	0	0	0	0	0
											China	P62	Q62	R62	S62	T62	U62	V62	P62	P62	P62	P62						China	0	0	0	0	0	0	0	0	0	0	0
											Japan	P63	Q63	R63	S63	T63	U63	V63	P63	P63	P63	P63						Japan	0	0	0	0	0	0	0	0	0	0	0
											India	P64	Q64	R64	S64	T64	U64	V64	P64	P64	P64	P64						India	2.06	2.24	2.61	6.5493	9.15926	11.2478	13.4042	14.8548	17.146	20.7885	28.4994
											South Korea	P65	Q65	R65	S65	T65	U65	V65	P65	P65	P65	P65						South Korea	0	0	0	0	0	0	0	0	0	0	0
											Australia	P66	Q66	R66	S66	T66	U66	V66	P66	P66	P66	P66						Australia	0	0	0	0	0	0	0	0	0	0	0
											Asia-Pacific-40	P67	Q67	R67	S67	T67	U67	V67	P67	P67	P67	P67						Asia-Pacific-40	3.43	4.6	6.01	2.52586	2.76409	3.01022	3.33265	3.75882	4.3257	5.08415	6.1056
											Middle East	P68	Q68	R68	S68	T68	U68	V68	P68	P68	P68	P68						Middle East	0	0	0	0	0	0	0	0	0	0	0
											Africa	P69	Q69	R69	S69	T69	U69	V69	P69	P69	P69	P69						Africa	0	0	0	0	0	0	0	0	0	0	0
											Global	P71	Q71	R71	S71	T71	U71	V71	W71	X71	Y71	Z71						Global	5.49	6.84	8.62	9.07516	11.9234	14.258	16.7368	18.6137	21.4717	25.8727	34.605
															LDV Calc sheet
									TOTAL VEHICLE STOCK (million)			LDV														ANNUAL PASSENGER TRAVEL ACTIVITY (billion passenger-km)									Only p-km performed by LDV
											Region	2000	2005	2010	2015	2020	2025	2030	2035	2040	2045	2050						Region	2000	2005	2010	2015	2020	2025	2030	2035	2040	2045	2050
											U.S.	P54	Q54	R54	S54	T54	U54	V54	W54	X54	Y54	Z54						U.S.	6371.93	6954.43	5866.35	6565.67	7259.4	7934.16	8624.06	9313.54	9986.77	10629.1	11231.1
											Canada	P55	Q55	R55	S55	T55	U55	V55	P55	P55	P55	P55						Canada	456.265	499.819	533.837	618.71	698.669	769.871	847.337	929.453	1013.7	1097.49	1178.58
											Mexico	P56	Q56	R56	S56	T56	U56	V56	P56	P56	P56	P56						Mexico	211.7	290.253	410.565	483.231	558.35	630.56	716.573	833.14	992.331	1183.45	1407.93
											Brazil	P57	Q57	R57	S57	T57	U57	V57	P57	P57	P57	P57						Brazil	557.152	591.478	801.401	941	1096.79	1255.17	1445.38	1670.99	1991.57	2371.69	2803.66
											Latin America-31	P58	Q58	R58	S58	T58	U58	V58	P58	P58	P58	P58						Latin America-31	365.533	380.604	492.086	590.82	692.335	786.275	901.336	1042.14	1213.75	1421.51	1684.03
											EU-27	P59	Q59	R59	S59	T59	U59	V59	P59	P59	P59	P59						EU-27	4296.21	4546.78	4753.78	5116.42	5569.14	5990.98	6457.71	6963.75	7511.91	8091.06	8699.85
											Russia	P60	Q60	R60	S60	T60	U60	VP60	P60	P60	P60	P60						Russia	456.68	562.671	720.551	923.718	1168.23	1419.69	1699.9	1990.69	2269.89	2514.88	2704.27
											Non-EU Europe	P61	Q61	R61	S61	T61	U61	V61	P61	P61	P61	P61						Non-EU Europe	373.085	411.605	462.747	576.582	697.457	823.683	999.259	1196.24	1410.71	1637.06	1865.92
											China	P62	Q62	R62	S62	T62	U62	V62	P62	P62	P62	P62						China	295.238	832.079	2068.77	3039.59	4388.92	5404.89	6647.19	8003.29	9463.04	10951.1	12253.5
											Japan	P63	Q63	R63	S63	T63	U63	V63	P63	P63	P63	P63						Japan	866.121	848.245	751.321	758.848	759.311	753.474	744.695	733.911	721.802	709.26	696.974
											India	P64	Q64	R64	S64	T64	U64	V64	P64	P64	P64	P64						India	127.876	228.064	391.581	725.915	1191.63	1684.7	2331.18	2998.02	3962.62	5337.14	7711.47
											South Korea	P65	Q65	R65	S65	T65	U65	V65	P65	P65	P65	P65						South Korea	216.558	247.42	268.8	363.713	438.033	478.007	523.248	573.522	627.278	681.517	732.641
											Australia	P66	Q66	R66	S66	T66	U66	V66	P66	P66	P66	P66						Australia	238.355	260.031	263.576	324.619	371.56	396.716	425.321	457.411	492.758	531.089	572.149
											Asia-Pacific-40	P67	Q67	R67	S67	T67	U67	V67	P67	P67	P67	P67						Asia-Pacific-40	332.903	462.954	605.32	755.751	930.448	1106.07	1342.91	1664.14	2099.83	2688.04	3472.92
											Middle East	P68	Q68	R68	S68	T68	U68	V68	P68	P68	P68	P68						Middle East	384.254	507.038	701.175	903.211	1151.19	1447.82	1831.4	2322.09	2974.66	3902.26	5081.57
											Africa	P69	Q69	R69	S69	T69	U69	V69	P69	P69	P69	P69						Africa	278.952	323.66	374.479	435.52	492.72	534.755	584.234	642.59	711.689	794.042	892.995
											Global	P71	Q71	R71	S71	T71	U71	V71	W71	X71	Y71	Z71						Global	15828.8	17947.1	19466.3	23123.3	27464.2	31416.8	36121.7	41334.9	47444.3	54540.7	62989.6
																													15828.8	17947.1	19466.3	23123.3	27464.2	31416.8	36121.7	41334.9	47444.3	54540.7	62989.6
															LDV Calc sheet
									TOTAL VEHICLE STOCK (million)			LDV														TOTAL ANNUAL PASSENGER TRAVEL ACTIVITY (billion passenger-km)									Only p-km performed by BUS
											Region	2000	2005	2010	2015	2020	2025	2030	2035	2040	2045	2050						Region	2000	2005	2010	2015	2020	2025	2030	2035	2040	2045	2050
											U.S.	P54	Q54	R54	S54	T54	U54	V54	W54	X54	Y54	Z54						U.S.	536.929	480.056	505.285	519.933	534.246	547.634	559.161	568.584	575.732	580.404	582.708
											Canada	P55	Q55	R55	S55	T55	U55	V55	P55	P55	P55	P55						Canada	46.3955	49.6938	56.918	57.4904	58.3819	59.4076	60.2159	60.75	61.0628	61.2161	61.2303
											Mexico	P56	Q56	R56	S56	T56	U56	V56	P56	P56	P56	P56						Mexico	381.967	423.031	452.042	492.316	534.696	576.172	624.721	666.658	693.003	716.987	737.449
											Brazil	P57	Q57	R57	S57	T57	U57	V57	P57	P57	P57	P57						Brazil	545.215	516.369	539.908	559.577	588.654	621.674	663.201	715.196	716.951	710.334	699.808
											Latin America-31	P58	Q58	R58	S58	T58	U58	V58	P58	P58	P58	P58						Latin America-31	549.268	673.151	937.463	1008.47	1085.45	1160.1	1248.26	1352.72	1476.92	1625.08	1787.33
											EU-27	P59	Q59	R59	S59	T59	U59	V59	P59	P59	P59	P59						EU-27	516.017	523.976	511.665	535.166	529.591	524.829	519.016	518.021	514.426	515.511	513.3
											Russia	P60	Q60	R60	S60	T60	U60	VP60	P60	P60	P60	P60						Russia	191.003	142.015	118.047	132.729	132.145	128.346	124.335	120.344	116.33	111.916	106.683
											Non-EU Europe	P61	Q61	R61	S61	T61	U61	V61	P61	P61	P61	P61						Non-EU Europe	295.134	333.179	371.592	391.764	420.16	440.315	433.815	426.991	420.138	412.917	404.669
											China	P62	Q62	R62	S62	T62	U62	V62	P62	P62	P62	P62						China	4155.54	5069.61	6090.43	7135.44	8469.32	9665.74	11263.1	13338.9	15766.3	18276.6	20584.8
											Japan	P63	Q63	R63	S63	T63	U63	V63	P63	P63	P63	P63						Japan	87.1476	88.4004	80.5415	71.1096	63.9085	58.4386	52.9652	47.7814	43.0556	38.8965	35.3235
											India	P64	Q64	R64	S64	T64	U64	V64	P64	P64	P64	P64						India	1325.06	1607.71	2098.54	3213.92	4360.96	5199.64	5980.01	6353.2	6978.92	7989.54	8483.18
											South Korea	P65	Q65	R65	S65	T65	U65	V65	P65	P65	P65	P65						South Korea	214.642	380.332	413.197	450.363	475.029	487.398	498.308	506.687	511.482	512.049	508.217
											Australia	P66	Q66	R66	S66	T66	U66	V66	P66	P66	P66	P66						Australia	17.772	19.3332	19.5967	20.4132	21.334	22.2831	23.1179	23.8385	24.4694	25.0288	25.51
											Asia-Pacific-40	P67	Q67	R67	S67	T67	U67	V67	P67	P67	P67	P67						Asia-Pacific-40	1359.09	1788.79	2149.89	2272.37	2426.12	2589.89	2802.03	3078.32	3438.79	3909.01	4522.45
											Middle East	P68	Q68	R68	S68	T68	U68	V68	P68	P68	P68	P68						Middle East	202.12	283.809	514.766	606.351	711.372	829.622	972.82	1147.65	1333.06	1453.84	1568.27
											Africa	P69	Q69	R69	S69	T69	U69	V69	P69	P69	P69	P69						Africa	830.755	936.116	1059.45	1142.76	1230.93	1311.99	1402.63	1504.33	1618.73	1747.59	1892.99
											Global	P71	Q71	R71	S71	T71	U71	V71	W71	X71	Y71	Z71						Global	11254.1	13315.6	15919.3	18610.2	21642.3	24223.5	27227.7	30430	34289.4	38686.9	42513.9
															LDV Calc sheet
									TOTAL VEHICLE STOCK (million)			LDV														TOTAL ANNUAL PASSENGER TRAVEL ACTIVITY (billion passenger-km)									Only p-km performed by 2W
											Region	2000	2005	2010	2015	2020	2025	2030	2035	2040	2045	2050						Region	2000	2005	2010	2015	2020	2025	2030	2035	2040	2045	2050
											U.S.	P54	Q54	R54	S54	T54	U54	V54	W54	X54	Y54	Z54						U.S.	25.1358	27.7967	32.3072	35.7148	39.0828	42.3433	45.6434	48.9063	52.0553	55.0202	57.7598
											Canada	P55	Q55	R55	S55	T55	U55	V55	P55	P55	P55	P55						Canada	1.77082	2.9916	3.8144	4.31967	4.79235	5.21521	5.66986	6.14561	6.6281	7.10304	7.55768
											Mexico	P56	Q56	R56	S56	T56	U56	V56	P56	P56	P56	P56						Mexico	3.28356	6.62448	13.5043	15.5627	17.6932	19.7441	22.1753	25.2961	29.332	34.1092	39.6492
											Brazil	P57	Q57	R57	S57	T57	U57	V57	P57	P57	P57	P57						Brazil	28.3512	50.8645	109.33	123.623	133.689	144.7	158.587	176.137	204.316	240.907	288.312
											Latin America-31	P58	Q58	R58	S58	T58	U58	V58	P58	P58	P58	P58						Latin America-31	44.7	64.1847	123.881	143.553	163.925	182.908	205.986	234.034	268.018	308.975	359.645
											EU-27	P59	Q59	R59	S59	T59	U59	V59	P59	P59	P59	P59						EU-27	109.003	123.222	120.565	224.783	249.343	274.768	302.293	332.219	364.958	398.662	434.573
											Russia	P60	Q60	R60	S60	T60	U60	VP60	P60	P60	P60	P60						Russia	30.7082	32.2904	35.672	44.2331	53.2851	62.3457	72.0945	81.8908	91.1828	99.129	104.947
											Non-EU Europe	P61	Q61	R61	S61	T61	U61	V61	P61	P61	P61	P61						Non-EU Europe	15.7966	13.8972	18.9283	22.511	26.3984	30.3302	35.3533	40.9772	46.9007	52.9749	59.0512
											China	P62	Q62	R62	S62	T62	U62	V62	P62	P62	P62	P62						China	194.777	466.747	616.107	803.301	1088.03	1304.48	1523.96	1760.96	2001.69	2244.22	2450
											Japan	P63	Q63	R63	S63	T63	U63	V63	P63	P63	P63	P63						Japan	75.2334	68.9922	66.8985	65.924	64.7905	63.48	61.8871	60.0508	58.2115	56.4531	54.828
											India	P64	Q64	R64	S64	T64	U64	V64	P64	P64	P64	P64						India	351.856	557.803	865.785	1363.57	1906.96	2341.8	2790.76	3092.79	3569.81	4328.18	5933.59
											South Korea	P65	Q65	R65	S65	T65	U65	V65	P65	P65	P65	P65						South Korea	4.36603	6.2645	6.80583	8.89699	10.4744	11.3179	12.2596	13.2896	14.3714	15.4411	16.4251
											Australia	P66	Q66	R66	S66	T66	U66	V66	P66	P66	P66	P66						Australia	1.67266	1.82591	1.8508	2.22078	2.50222	2.66143	2.83738	3.03018	3.23897	3.46251	3.69908
											Asia-Pacific-40	P67	Q67	R67	S67	T67	U67	V67	P67	P67	P67	P67						Asia-Pacific-40	294.054	463.825	734.499	853.339	992.912	1134.47	1323.76	1578.3	1920.64	2379.12	2986.83
											Middle East	P68	Q68	R68	S68	T68	U68	V68	P68	P68	P68	P68						Middle East	11.857	16.2976	25.5683	32.0558	39.8962	49.149	60.9443	75.8727	95.0267	120.241	151.652
											Africa	P69	Q69	R69	S69	T69	U69	V69	P69	P69	P69	P69						Africa	24.0615	36.05	45.0636	50.3954	55.6184	59.8229	64.6644	70.2567	76.7422	84.3023	93.172
											Global	P71	Q71	R71	S71	T71	U71	V71	W71	X71	Y71	Z71						Global	1216.63	1939.68	2820.58	3794	4849.4	5729.54	6688.88	7600.15	8803.11	10428.3	13041.7
															LDV Calc sheet
									TOTAL VEHICLE STOCK (million)			LDV														TOTAL ANNUAL PASSENGER TRAVEL ACTIVITY (billion passenger-km)									Only p-km performed by 3W
											Region	2000	2005	2010	2015	2020	2025	2030	2035	2040	2045	2050						Region	2000	2005	2010	2015	2020	2025	2030	2035	2040	2045	2050
											U.S.	P54	Q54	R54	S54	T54	U54	V54	W54	X54	Y54	Z54						U.S.	0	0	0	0	0	0	0	0	0	0	0
											Canada	P55	Q55	R55	S55	T55	U55	V55	P55	P55	P55	P55						Canada	0	0	0	0	0	0	0	0	0	0	0
											Mexico	P56	Q56	R56	S56	T56	U56	V56	P56	P56	P56	P56						Mexico	0	0	0	0	0	0	0	0	0	0	0
											Brazil	P57	Q57	R57	S57	T57	U57	V57	P57	P57	P57	P57						Brazil	0	0	0	0	0	0	0	0	0	0	0
											Latin America-31	P58	Q58	R58	S58	T58	U58	V58	P58	P58	P58	P58						Latin America-31	0	0	0	0	0	0	0	0	0	0	0
											EU-27	P59	Q59	R59	S59	T59	U59	V59	P59	P59	P59	P59						EU-27	0	0	0	0	0	0	0	0	0	0	0
											Russia	P60	Q60	R60	S60	T60	U60	VP60	P60	P60	P60	P60						Russia	0	0	0	0	0	0	0	0	0	0	0
											Non-EU Europe	P61	Q61	R61	S61	T61	U61	V61	P61	P61	P61	P61						Non-EU Europe	0	0	0	0	0	0	0	0	0	0	0
											China	P62	Q62	R62	S62	T62	U62	V62	P62	P62	P62	P62						China	0	0	0	0	0	0	0	0	0	0	0
											Japan	P63	Q63	R63	S63	T63	U63	V63	P63	P63	P63	P63						Japan	0	0	0	0	0	0	0	0	0	0	0
											India	P64	Q64	R64	S64	T64	U64	V64	P64	P64	P64	P64						India	170.887	199.595	262.812	413.916	578.865	710.861	847.145	938.826	1083.63	1313.83	1801.16
											South Korea	P65	Q65	R65	S65	T65	U65	V65	P65	P65	P65	P65						South Korea	0	0	0	0	0	0	0	0	0	0	0
											Australia	P66	Q66	R66	S66	T66	U66	V66	P66	P66	P66	P66						Australia	0	0	0	0	0	0	0	0	0	0	0
											Asia-Pacific-40	P67	Q67	R67	S67	T67	U67	V67	P67	P67	P67	P67						Asia-Pacific-40	107.319	145.218	148.91	161.655	176.902	192.654	213.29	240.564	276.845	325.385	390.759
											Middle East	P68	Q68	R68	S68	T68	U68	V68	P68	P68	P68	P68						Middle East	0	0	0	0	0	0	0	0	0	0	0
											Africa	P69	Q69	R69	S69	T69	U69	V69	P69	P69	P69	P69						Africa	0	0	0	0	0	0	0	0	0	0	0
											Global	P71	Q71	R71	S71	T71	U71	V71	W71	X71	Y71	Z71						Global	278.206	344.813	411.722	575.571	755.767	903.515	1060.43	1179.39	1360.47	1639.22	2191.92
																												TOTAL Passenger	2.85777e+07	3.35472e+07	3.8618e+07	4.61031e+07	5.47116e+07	6.22733e+07	7.10988e+07	8.05444e+07	9.18973e+07	1.05295e+08	1.20737e+08
															LDV Calc sheet
									TOTAL VEHICLE STOCK (million)			LDV														TOTAL ANNUAL FREIGHT TRAVEL ACTIVITY (billion metric ton-km)									Only t-km performed by LHDT
											Region	2000	2005	2010	2015	2020	2025	2030	2035	2040	2045	2050						Region	2000	2005	2010	2015	2020	2025	2030	2035	2040	2045	2050
											U.S.	P54	Q54	R54	S54	T54	U54	V54	W54	X54	Y54	Z54						U.S.	83.8824	94.5015	98.5216	105.1	111.888	118.771	126.175	134.033	142.251	150.721	159.332
											Canada	P55	Q55	R55	S55	T55	U55	V55	P55	P55	P55	P55						Canada	17.6654	21.468	25.1908	26.6859	28.1724	29.5657	31.1441	32.9051	34.8258	36.8714	39.0008
											Mexico	P56	Q56	R56	S56	T56	U56	V56	P56	P56	P56	P56						Mexico	12.1004	12.7286	13.3105	15.2954	17.3436	19.3195	21.6498	24.3976	27.6317	31.4147	35.7887
											Brazil	P57	Q57	R57	S57	T57	U57	V57	P57	P57	P57	P57						Brazil	2.7183	2.25703	2.0874	2.23873	2.48722	2.64582	2.83048	3.04536	3.29504	3.58387	3.91364
											Latin America-31	P58	Q58	R58	S58	T58	U58	V58	P58	P58	P58	P58						Latin America-31	16.1299	17.8697	23.0419	27.5421	32.1948	36.548	41.7474	47.9744	55.4419	64.3982	75.1263
											EU-27	P59	Q59	R59	S59	T59	U59	V59	P59	P59	P59	P59						EU-27	50.3797	56.2842	61.7222	61.5056	61.8581	66.1865	70.6931	75.763	81.4124	87.6463	94.4707
											Russia	P60	Q60	R60	S60	T60	U60	VP60	P60	P60	P60	P60						Russia	5.72525	7.71505	8.58528	8.91665	9.29555	9.6958	10.1682	10.7023	11.2808	11.8818	12.4775
											Non-EU Europe	P61	Q61	R61	S61	T61	U61	V61	P61	P61	P61	P61						Non-EU Europe	6.29002	10.9589	18.0417	19.6658	21.4899	23.3263	25.5248	28.1197	31.1382	34.5949	38.4599
											China	P62	Q62	R62	S62	T62	U62	V62	P62	P62	P62	P62						China	172.908	218.898	324.263	391.753	470.72	532.252	608.807	701.165	807.739	922.593	1034.26
											Japan	P63	Q63	R63	S63	T63	U63	V63	P63	P63	P63	P63						Japan	10.2718	8.47722	7.7987	7.76521	7.67365	7.52689	7.3426	7.13552	6.91832	6.70362	6.50026
											India	P64	Q64	R64	S64	T64	U64	V64	P64	P64	P64	P64						India	26.533	34.7959	73.3483	126.499	192.596	255.463	327.045	404.266	506.495	614.227	721.788
											South Korea	P65	Q65	R65	S65	T65	U65	V65	P65	P65	P65	P65						South Korea	1.84095	1.4366	1.74227	2.82832	3.69997	4.20578	4.76792	5.38607	6.05089	6.74194	7.43127
											Australia	P66	Q66	R66	S66	T66	U66	V66	P66	P66	P66	P66						Australia	5.60875	8.00159	9.84561	10.4274	10.8949	11.1593	11.4599	11.799	12.1768	12.5931	13.0486
											Asia-Pacific-40	P67	Q67	R67	S67	T67	U67	V67	P67	P67	P67	P67						Asia-Pacific-40	31.9058	38.0072	45.6022	55.2238	66.0733	76.7264	90.5425	108.559	132.084	162.755	202.497
											Middle East	P68	Q68	R68	S68	T68	U68	V68	P68	P68	P68	P68						Middle East	6.08829	8.39041	14.2152	18.1894	22.9337	28.4922	35.5259	44.4304	55.7271	70.065	88.1485
											Africa	P69	Q69	R69	S69	T69	U69	V69	P69	P69	P69	P69						Africa	25.1991	29.7179	33.732	38.3927	43.0238	46.9833	51.4376	56.4607	62.1397	68.576	75.8949
											Global	P71	Q71	R71	S71	T71	U71	V71	W71	X71	Y71	Z71						Global	475.247	571.508	761.049	918.028	1102.34	1268.87	1466.86	1696.14	1976.61	2285.37	2608.13
															LDV Calc sheet
									TOTAL VEHICLE STOCK (million)			LDV														TOTAL ANNUAL FREIGHT TRAVEL ACTIVITY (billion metric ton-km)									Only t-km performed by MHDT
											Region	2000	2005	2010	2015	2020	2025	2030	2035	2040	2045	2050						Region	2000	2005	2010	2015	2020	2025	2030	2035	2040	2045	2050
											U.S.	P54	Q54	R54	S54	T54	U54	V54	W54	X54	Y54	Z54						U.S.	180.148	202.629	211.671	225.804	240.387	255.175	271.084	287.965	305.622	323.819	342.321
											Canada	P55	Q55	R55	S55	T55	U55	V55	P55	P55	P55	P55						Canada	22.4114	20.5264	21.0016	22.2481	23.4874	24.649	25.9649	27.4331	29.0344	30.7398	32.5151
											Mexico	P56	Q56	R56	S56	T56	U56	V56	P56	P56	P56	P56						Mexico	25.3178	26.6321	27.8497	32.0028	36.2882	40.4224	45.298	51.0473	57.814	65.7293	74.8809
											Brazil	P57	Q57	R57	S57	T57	U57	V57	P57	P57	P57	P57						Brazil	20.2007	15.508	12.6238	13.6359	15.0228	15.9808	17.0961	18.394	19.9021	21.6466	23.6384
											Latin America-31	P58	Q58	R58	S58	T58	U58	V58	P58	P58	P58	P58						Latin America-31	68.4138	72.4235	85.955	102.742	120.098	136.337	155.733	178.962	206.819	240.229	280.249
											EU-27	P59	Q59	R59	S59	T59	U59	V59	P59	P59	P59	P59						EU-27	145.345	162.38	178.068	194.055	209.689	225.182	242.32	261.194	282.259	305.086	329.621
											Russia	P60	Q60	R60	S60	T60	U60	VP60	P60	P60	P60	P60						Russia	57.5461	62.1264	56.0087	58.1705	60.6424	63.2535	66.3356	69.8199	73.5936	77.5145	81.4008
											Non-EU Europe	P61	Q61	R61	S61	T61	U61	V61	P61	P61	P61	P61						Non-EU Europe	28.4111	38.6655	44.0796	48.0476	52.5045	56.991	62.3626	68.7025	76.0774	84.5226	93.9657
											China	P62	Q62	R62	S62	T62	U62	V62	P62	P62	P62	P62						China	192.729	185.205	218.406	263.863	317.051	358.496	410.059	472.267	544.049	621.408	696.618
											Japan	P63	Q63	R63	S63	T63	U63	V63	P63	P63	P63	P63						Japan	259.121	274.997	272.368	271.199	268.001	262.875	256.439	249.207	241.621	234.123	227.021
											India	P64	Q64	R64	S64	T64	U64	V64	P64	P64	P64	P64						India	38.1198	64.5343	130.092	224.361	341.593	453.096	580.056	717.018	898.332	1089.41	1280.18
											South Korea	P65	Q65	R65	S65	T65	U65	V65	P65	P65	P65	P65						South Korea	46.4405	46.6027	56.5185	91.7494	120.025	136.433	154.669	174.721	196.288	218.705	241.066
											Australia	P66	Q66	R66	S66	T66	U66	V66	P66	P66	P66	P66						Australia	26.3584	31.5357	32.4617	34.3798	35.9212	36.7929	37.7839	38.9021	40.1477	41.5204	43.0221
											Asia-Pacific-40	P67	Q67	R67	S67	T67	U67	V67	P67	P67	P67	P67						Asia-Pacific-40	94.2353	117.487	131.74	159.535	190.878	221.654	261.567	313.615	381.577	470.182	584.992
											Middle East	P68	Q68	R68	S68	T68	U68	V68	P68	P68	P68	P68						Middle East	27.9286	33.727	46.5224	59.5291	75.0556	93.2471	116.267	145.409	182.38	229.304	288.486
											Africa	P69	Q69	R69	S69	T69	U69	V69	P69	P69	P69	P69						Africa	130.939	160.369	174.678	198.812	222.794	243.298	266.364	292.376	321.784	355.114	393.014
											Global	P71	Q71	R71	S71	T71	U71	V71	W71	X71	Y71	Z71						Global	1363.67	1515.35	1700.04	2000.14	2329.44	2623.88	2969.4	3367.03	3857.3	4409.05	5012.99
															LDV Calc sheet
									TOTAL VEHICLE STOCK (million)			LDV														TOTAL ANNUAL FREIGHT TRAVEL ACTIVITY (billion metric ton-km)									Only t-km performed by HHDT
											Region	2000	2005	2010	2015	2020	2025	2030	2035	2040	2045	2050						Region	2000	2005	2010	2015	2020	2025	2030	2035	2040	2045	2050
											U.S.	P54	Q54	R54	S54	T54	U54	V54	W54	X54	Y54	Z54						U.S.	1476.73	1596.86	1667.55	1778.89	1893.78	2010.28	2135.61	2268.61	2407.71	2551.07	2696.82
											Canada	P55	Q55	R55	S55	T55	U55	V55	P55	P55	P55	P55						Canada	164.737	233.574	212.697	225.321	237.873	249.637	262.964	277.833	294.05	311.322	329.301
											Mexico	P56	Q56	R56	S56	T56	U56	V56	P56	P56	P56	P56						Mexico	154.142	162.143	169.557	194.842	220.933	246.102	275.787	310.79	351.987	400.178	455.896
											Brazil	P57	Q57	R57	S57	T57	U57	V57	P57	P57	P57	P57						Brazil	355.245	488.537	712.3	773.686	847.744	901.803	964.74	1037.98	1123.08	1221.53	1333.92
											Latin America-31	P58	Q58	R58	S58	T58	U58	V58	P58	P58	P58	P58						Latin America-31	87.212	100.133	152.657	182.471	213.296	242.137	276.584	317.84	367.313	426.65	497.726
											EU-27	P59	Q59	R59	S59	T59	U59	V59	P59	P59	P59	P59						EU-27	1836.59	2051.84	2250.08	2439.18	2620.76	2795.73	2993.85	3209.67	3450.18	3710.84	3996.01
											Russia	P60	Q60	R60	S60	T60	U60	VP60	P60	P60	P60	P60						Russia	141.957	143.947	157.192	163.26	170.197	177.525	186.175	195.954	206.546	217.55	228.457
											Non-EU Europe	P61	Q61	R61	S61	T61	U61	V61	P61	P61	P61	P61						Non-EU Europe	152.692	192.355	206.455	225.039	245.914	266.927	292.086	321.78	356.322	395.876	440.105
											China	P62	Q62	R62	S62	T62	U62	V62	P62	P62	P62	P62						China	273.188	591.614	1199.21	1448.81	1740.85	1968.41	2251.53	2593.1	2987.24	3412	3824.95
											Japan	P63	Q63	R63	S63	T63	U63	V63	P63	P63	P63	P63						Japan	43.6245	51.4392	54.0079	53.7759	53.1419	52.1255	50.8493	49.4152	47.911	46.4242	45.0159
											India	P64	Q64	R64	S64	T64	U64	V64	P64	P64	P64	P64						India	295.985	457.506	739.447	1275.27	1941.62	2575.4	3297.05	4075.54	5106.13	6192.21	7276.57
											South Korea	P65	Q65	R65	S65	T65	U65	V65	P65	P65	P65	P65						South Korea	7.81854	8.71721	10.572	17.1621	22.4512	25.5204	28.9314	32.6823	36.7164	40.9096	45.0924
											Australia	P66	Q66	R66	S66	T66	U66	V66	P66	P66	P66	P66						Australia	107.423	133.493	143.606	152.091	158.91	162.767	167.151	172.097	177.608	183.68	190.324
											Asia-Pacific-40	P67	Q67	R67	S67	T67	U67	V67	P67	P67	P67	P67						Asia-Pacific-40	199.629	244.177	261.199	316.31	378.453	439.472	518.607	621.801	756.551	932.226	1159.86
											Middle East	P68	Q68	R68	S68	T68	U68	V68	P68	P68	P68	P68						Middle East	79.6934	130.382	256.806	328.604	414.312	514.73	641.799	802.664	1006.75	1265.77	1592.46
											Africa	P69	Q69	R69	S69	T69	U69	V69	P69	P69	P69	P69						Africa	128.809	165.697	187.762	213.705	239.483	261.522	286.316	314.277	345.887	381.713	422.453
											Global	P71	Q71	R71	S71	T71	U71	V71	W71	X71	Y71	Z71						Global	5505.47	6752.41	8381.11	9788.42	11399.7	12890.1	14630	16602	19022	21689.9	24535
																												Total Freight	7.34439e+06	8.83927e+06	1.08422e+07	1.27066e+07	1.48315e+07	1.67828e+07	1.90663e+07	2.16652e+07	2.48559e+07	2.83844e+07	3.21561e+07
																										LOAD FACTOR (passengers/vehicle)						2W								2W
																												Region	2000	2005	2010	2015	2020	2025	2030	2035	2040	2045	2050
																												U.S.	1.48	1.67	1.08	1.08	1.08	1.08	1.08	1.08	1.08	1.08	1.08
																												Canada	1.1	1.3	1.3	1.3	1.3	1.3	1.3	1.3	1.3	1.3	1.3
																												Mexico	1.1	1.1	1.1	1.1	1.1	1.1	1.1	1.1	1.1	1.1	1.1
																												Brazil	1.1	1.1	1.1	1.1	1.1	1.1	1.1	1.1	1.1	1.1	1.1
																												Latin America-31	1.1	1.1	1.1	1.1	1.1	1.1	1.1	1.1	1.1	1.1	1.1
																												EU-27	1.1	1.1	1.1	1.1	1.1	1.1	1.1	1.1	1.1	1.1	1.1
																												Russia	1.1	1.1	1.1	1.1	1.1	1.1	1.1	1.1	1.1	1.1	1.1
																												Non-EU Europe	1.1	1.1	1.1	1.1	1.1	1.1	1.1	1.1	1.1	1.1	1.1
																												China	1.1	1.1	1.1	1.1	1.1	1.1	1.1	1.1	1.1	1.1	1.1
																												Japan	1.1	1.1	1.1	1.1	1.1	1.1	1.1	1.1	1.1	1.1	1.1
																												India	1.2	1.2	1.2	1.2	1.2	1.2	1.2	1.2	1.2	1.2	1.2
																												South Korea	1.1	1.1	1.1	1.1	1.1	1.1	1.1	1.1	1.1	1.1	1.1
																												Australia	1.1	1.1	1.1	1.1	1.1	1.1	1.1	1.1	1.1	1.1	1.1
																												Asia-Pacific-40	1.1	1.1	1.1	1.1	1.1	1.1	1.1	1.1	1.1	1.1	1.1
																												Middle East	1.1	1.1	1.1	1.1	1.1	1.1	1.1	1.1	1.1	1.1	1.1
																												Africa	1.2	1.2	1.2	1.2	1.2	1.2	1.2	1.2	1.2	1.2	1.2
																												Global	1.13503	1.13496	1.13074	1.13074	1.13074	1.13074	1.13074	1.13074	1.13074	1.13074	1.13074
																										AVERAGE ANNUAL DISTANCE TRAVELED PER VEHICLE (km)							2W
																												Region	2000	2005	2010	2015	2020	2025	2030	2035	2040	2045	2050
																												U.S.	2409	2702	2702	2702	2702	2702	2702	2702	2702	2702	2702
																												Canada	5101	5345	5084	5084	5084	5084	5084	5084	5084	5084	5084
																												Mexico	5167	7000	7000	7000	7000	7000	7000	7000	7000	7000	7000
																												Brazil	8918	7994	8827	8648	8438	8438	8438	8438	8438	8438	8438
																												Latin America-31	9000	9000	9000	9000	9000	9000	9000	9000	9000	9000	9000
																												EU-27	5799.92	5799.92	5799.92	5847.25	5896.45	5924.82	6008.86	6052.28	6101.31	6135.11	6173.01
																												Russia	3000	3000	3000	3000	3000	3000	3000	3000	3000	3000	3000
																												Non-EU Europe	3000	3000	3000	3000	3000	3000	3000	3000	3000	3000	3000
																												China	5600	5600	5600	5600	5600	5600	5600	5600	5600	5600	5600
																												Japan	5000	5000	5000	5000	5000	5000	5000	5000	5000	5000	5000
																												India	10001	10001	10001	10001	10001	10001	10001	10001	10001	10001	10001
																												South Korea	5000	5000	5000	5000	5000	5000	5000	5000	5000	5000	5000
																												Australia	3400	3800	4700	4700	4700	4700	4700	4700	4700	4700	4700
																												Asia-Pacific-40	5000	5000	5000	5000	5000	5000	5000	5000	5000	5000	5000
																												Middle East	7000	7000	7000	7000	7000	7000	7000	7000	7000	7000	7000
																												Africa	5229	5115	5015	5015	5015	5015	5015	5015	5015	5015	5015
																												Global
																										LOAD FACTOR (passengers/vehicle)						3W								3W
																												Region	2000	2005	2010	2015	2020	2025	2030	2035	2040	2045	2050
																												U.S.	1.2	1.2	1.2	1.2	1.2	1.2	1.2	1.2	1.2	1.2	1.2
																												Canada	1.2	1.2	1.2	1.2	1.2	1.2	1.2	1.2	1.2	1.2	1.2
																												Mexico	1.2	1.2	1.2	1.6	1.6	1.6	1.6	1.6	1.6	1.6	1.6
																												Brazil	1.2	1.2	1.2	1.6	1.6	1.6	1.6	1.6	1.6	1.6	1.6
																												Latin America-31	1.2	1.2	1.2	1.6	1.6	1.6	1.6	1.6	1.6	1.6	1.6
																												EU-27	1.2	1.2	1.2	1.2	1.2	1.2	1.2	1.2	1.2	1.2	1.2
																												Russia	1.2	1.2	1.2	1.4	1.4	1.4	1.4	1.4	1.4	1.4	1.4
																												Non-EU Europe	1.2	1.2	1.2	1.4	1.4	1.4	1.4	1.4	1.4	1.4	1.4
																												China	1.2	1.2	1.2	1.6	1.6	1.6	1.6	1.6	1.6	1.6	1.6
																												Japan	1.2	1.2	1.2	1.2	1.2	1.2	1.2	1.2	1.2	1.2	1.2
																												India	2	2	2	2	2	2	2	2	2	2	2
																												South Korea	1.2	1.2	1.2	1.2	1.2	1.2	1.2	1.2	1.2	1.2	1.2
																												Australia	1.2	1.2	1.2	1.2	1.2	1.2	1.2	1.2	1.2	1.2	1.2
																												Asia-Pacific-40	1.2	1.2	1.2	1.6	1.6	1.6	1.6	1.6	1.6	1.6	1.6
																												Middle East	1.2	1.2	1.2	1.6	1.6	1.6	1.6	1.6	1.6	1.6	1.6
																												Africa	1.2	1.2	1.2	1.6	1.6	1.6	1.6	1.6	1.6	1.6	1.6
																												Global	1.58036	1.55127	1.6031	1.80155	1.80155	1.80155	1.80155	1.80155	1.80155	1.80155	1.80155
																										AVERAGE ANNUAL DISTANCE TRAVELED PER VEHICLE (km)							3W
																												Region	2000	2005	2010	2015	2020	2025	2030	2035	2040	2045	2050
																												U.S.	20000	20000	20000	40000	40000	40000	40000	40000	40000	40000	40000
																												Canada	20000	20000	20000	40000	40000	40000	40000	40000	40000	40000	40000
																												Mexico	20000	20000	20000	40000	40000	40000	40000	40000	40000	40000	40000
																												Brazil	20000	20000	20000	40000	40000	40000	40000	40000	40000	40000	40000
																												Latin America-31	20000	20000	20000	40000	40000	40000	40000	40000	40000	40000	40000
																												EU-27	20000	20000	20000	40000	40000	40000	40000	40000	40000	40000	40000
																												Russia	20000	20000	20000	40000	40000	40000	40000	40000	40000	40000	40000
																												Non-EU Europe	20000	20000	20000	40000	40000	40000	40000	40000	40000	40000	40000
																												China	20000	20000	20000	40000	40000	40000	40000	40000	40000	40000	40000
																												Japan	20000	20000	20000	40000	40000	40000	40000	40000	40000	40000	40000
																												India	30800	31200	31600	31600	31600	31600	31600	31600	31600	31600	31600
																												South Korea	20000	20000	20000	40000	40000	40000	40000	40000	40000	40000	40000
																												Australia	20000	20000	20000	40000	40000	40000	40000	40000	40000	40000	40000
																												Asia-Pacific-40	20000	20000	20000	40000	40000	40000	40000	40000	40000	40000	40000
																												Middle East	20000	20000	20000	40000	40000	40000	40000	40000	40000	40000	40000
																												Africa	40000	40000	40000	40000	40000	40000	40000	40000	40000	40000	40000
																												Global
																										PAYLOAD (metric tons/vehicle)							LHDT							LHDT
																												Region	2000	2005	2010	2015	2020	2025	2030	2035	2040	2045	2050
																												U.S.	1.11	1.13	0.84	0.84	0.84	0.84	0.84	0.84	0.84	0.84	0.84
																												Canada	0.55	0.57	0.58	0.58	0.58	0.58	0.58	0.58	0.58	0.58	0.58
																												Mexico	0.3	0.3	0.3	0.3	0.3	0.3	0.3	0.3	0.3	0.3	0.3
																												Brazil	0.3	0.3	0.3	0.3	0.3	0.3	0.3	0.3	0.3	0.3	0.3
																												Latin America-31	0.3	0.3	0.3	0.3	0.3	0.3	0.3	0.3	0.3	0.3	0.3
																												EU-27	0.19	0.19	0.19	0.19	0.19	0.19	0.2	0.2	0.2	0.2	0.2
																												Russia	0.19	0.19	0.19	0.19	0.19	0.19	0.19	0.19	0.19	0.19	0.19
																												Non-EU Europe	0.3	0.3	0.3	0.3	0.3	0.3	0.3	0.3	0.3	0.3	0.3
																												China	1.19	1.19	1.19	1.19	1.19	1.19	1.19	1.19	1.19	1.19	1.19
																												Japan	0.31	0.27	0.27	0.27	0.27	0.27	0.27	0.27	0.27	0.27	0.27
																												India	1.86	1.94	1.91	1.91	1.91	1.91	1.91	1.91	1.91	1.91	1.91
																												South Korea	0.2	0.2	0.2	0.2	0.2	0.2	0.2	0.2	0.2	0.2	0.2
																												Australia	0.18	0.21	0.25	0.25	0.25	0.25	0.25	0.25	0.25	0.25	0.25
																												Asia-Pacific-40	0.3	0.3	0.3	0.3	0.3	0.3	0.3	0.3	0.3	0.3	0.3
																												Middle East	0.2	0.2	0.2	0.2	0.2	0.2	0.2	0.2	0.2	0.2	0.2
																												Africa	0.4	0.4	0.4	0.4	0.4	0.4	0.4	0.4	0.4	0.4	0.4
																												Global	0.490538	0.508333	0.551869	0.551869	0.551869	0.551869	0.554125	0.554125	0.554125	0.554125	0.554125
																										AVERAGE ANNUAL DISTANCE TRAVELED PER VEHICLE (km)							LHDT
																												Region	2000	2005	2010	2015	2020	2025	2030	2035	2040	2045	2050
																												U.S.	29576	30492	33361	33361	33361	33361	33361	33361	33361	33361	33361
																												Canada	21760	21410	20507	20507	20507	20507	20507	20507	20507	20507	20507
																												Mexico	16833	16667	16500	16500	16500	16500	16500	16500	16500	16500	16500
																												Brazil	18469	14959	12453	11905	12221	12221	12221	12221	12221	12221	12221
																												Latin America-31	17333	17000	17000	17000	17000	17000	17000	17000	17000	17000	17000
																												EU-27	13260.7	13260.7	13260.7	13035.6	12813.5	12530.7	12399.9	12435.8	12473.7	12501.3	12530.3
																												Russia	11523	12358	13085	13085	13085	13085	13085	13085	13085	13085	13085
																												Non-EU Europe	17449	17511	17488	17488	17488	17488	17488	17488	17488	17488	17488
																												China	36000	37000	38000	38000	38000	38000	38000	38000	38000	38000	38000
																												Japan	7046	7046	7046	7046	7046	7046	7046	7046	7046	7046	7046
																												India	24000	25000	26000	26000	26000	26000	26000	26000	26000	26000	26000
																												South Korea	17217	16686	16089	16089	16089	16089	16089	16089	16089	16089	16089
																												Australia	16400	17500	18400	18400	18400	18400	18400	18400	18400	18400	18400
																												Asia-Pacific-40	17052	15490	15201	15201	15201	15201	15201	15201	15201	15201	15201
																												Middle East	19000	18056	18000	18000	18000	18000	18000	18000	18000	18000	18000
																												Africa	18223	17119	15986	15986	15986	15986	15986	15986	15986	15986	15986
																												Global
																												LDV				23123.3	27464.2	31416.8	36121.7	41334.9	47444.3	54540.7	62989.6
																												Bus				18610.2	21642.3	24223.5	27227.7	30430	34289.4	38686.9	42513.9
																												2W/3W				4369.57	5605.16	6633.05	7749.31	8779.54	10163.6	12067.5	15233.6
																												SUM				46103.1	54711.6	62273.3	71098.8	80544.4	91897.3	105295	120737
																												MDV				2918.16	3431.78	3892.75	4436.26	5063.18	5833.91	6694.42	7621.12
																												HDV				9788.42	11399.7	12890.1	14630	16602	19022	21689.9	24535
																												SUM				12706.6	14831.5	16782.8	19066.3	21665.2	24855.9	28384.4	32156.1

## Sheet: Population Nodes
These numbers are used in Bogdanov et al., 2019; Breyer et al., 2018; Ram et al., 2019 as nodes inside the countries.						Population in 1000people
Node	Node Name	Countries	2000	2005	2010	2015	2020	2025	2030	2035	2040	2045	2050
1	'NO'	Norway	5211	5211	5211	5211	5494	5725	5945	6142	6321	6491	6658
2	'DK'	Denmark	5669	5669	5669	5669	5776	5892	6003	6097	6173	6237	6299
3	'SE'	Sweden	9779	9779	9779	9779	10120	10463	10766	11030	11290	11574	11881
4	'FI'	Finland	5503	5503	5503	5503	5585	5656	5706	5732	5739	5742	5752
5	'BLT'	Baltic: Estonia, Latvia, Lithuania	6162	6162	6162	6162	6009	5862	5704	5539	5380	5235	5097
6	'PL'	Poland	38612	38612	38612	38612	38407	37924	37207	36297	35286	34228	33136
7	'IBE'	Iberia: Portugal, Spain, Gibraltar	56542	56542	56542	56542	56425	56156	55836	55604	55296	54831	54128
8	'FR'	France, Monaco, Andorra	64395	64395	64395	64395	65720	66896	68007	69049	69931	70613	71137
9	'BNL'	Belgium, Netherlands, Luxembourg	28791	28791	28791	28791	29424	29899	30302	30603	30796	30892	30932
10	'BRI'	British Isles: Ireland, United Kingdom, Isle of Man, Guernsey, Jersey	69404	69404	69404	69404	71574	73575	75317	76871	78359	79811	81150
11	'DE'	Germany	80689	80689	80689	80689	80392	79960	79294	78403	77300	75999	74513
12	'CRS'	Czech Republic, Slovakia	15969	15969	15969	15969	16008	15964	15814	15583	15330	15090	14857
13	'AUH'	Austria, Hungary	18400	18400	18400	18400	18341	18255	18119	17918	17678	17426	17164
14	'BKN-W'	Balkan-West: Slovenia, Croatia, Bosnia&Hertzegovina, Serbia, Kosova, Montenegro, Macedonia, Albania	24570	24570	24570	24570	24318	23980	23546	23013	22407	21768	21118
15	'BKN-E'	Balkan-East: Romania, Bulgaria, Greece	37616	37616	37616	37616	36557	35489	34419	33337	32264	31181	30066
16	'IT'	Italy, San Marino, Vatican	59798	59798	59798	59798	59741	59486	59100	58635	58078	57380	56513
17	'CH'	Switzerland, Liechtenstein	8299	8299	8299	8299	8654	8952	9223	9457	9660	9845	10019
18	'TR'	Turkey, Cyprus	79831	79831	79831	79831	83474	86124	89017	91793	94103	95927	97221
19	'UA'	Ukraine, Moldova	48893	48893	48893	48893	47700	46318	44731	43036	41375	39825	38360
20	'IS'	Iceland	329	329	329	329	342	354	364	373	380	385	389
21	'DZ'	Algeria	39666.5	39666.5	39666.5	39666.5	43007.8	45864.8	48274	50423.7	52496.3	54545.5	56461.2
22	'BHQ'	Bahrain and Qatar	3612.6	3612.6	3612.6	3612.6	3938.29	4210.17	4423	4606.96	4772.33	4911.44	5026.8
23	'EG'	Egypt	91508.1	91508.1	91508.1	91508.1	100518	108939	117102	125589	134428	143064	151111
24	'IR'	Iran	79109.3	79109.3	79109.3	79109.3	83403.3	86496.6	88529	89996.2	91205.2	92059.5	92218.8
25	'IQ'	Iraq	36423.4	36423.4	36423.4	36423.4	41972.4	47797.4	54071	60872.9	68127.3	75758.1	83652.1
26	'IL'	Israel	8064.04	8064.04	8064.04	8064.04	8718.24	9359.21	9998.27	10645.7	11301.5	11961.7	12610.1
27	'JWG'	Jordan (inc. West Bank 201 & Gaza Strip = State of Palestine)	12263	12263	12263	12263	13500.2	14587.1	15874	17312	18750.8	20162.4	21507.2
28	'KW'	Kuwait	3892.11	3892.11	3892.11	3892.11	4316.62	4672.2	4986.87	5252.06	5499.03	5724.99	5924.17
29	'LB'	Lebanon	5850.74	5850.74	5850.74	5850.74	5891.49	5408	5292	5429.37	5517.34	5572.82	5610.15
30	'LY'	Libya	6278.44	6278.44	6278.44	6278.44	6700.09	7086.25	7418	7713.2	7979.78	8206.99	8375
31	'MA'	Morocco	34377.5	34377.5	34377.5	34377.5	36444.3	38254.6	39787	41073.5	42148.4	43026.8	43696.5
32	'OM'	Oman	4490.54	4490.54	4490.54	4490.54	4815.88	5058.24	5238	5376.08	5506.88	5658.61	5843.56
33	'SA'	Saudi Arabia	31540.4	31540.4	31540.4	31540.4	34366.2	36846.8	39132	41235.4	43135.7	44762.9	46059.4
34	'TN'	Tunisia	11253.5	11253.5	11253.5	11253.5	11835.3	12320.1	12686	12954.9	13165.8	13342.4	13475.5
35	'AE'	United Arab Emirates	9156.96	9156.96	9156.96	9156.96	9822.01	10434.2	10977	11500.3	11994.7	12429.7	12789.1
36	'YE'	Yemen	26832.2	26832.2	26832.2	26832.2	30029.6	33181.1	36335	39361.4	42211	44839.2	47170
37	'SY'	Syria	18502.4	18502.4	18502.4	18502.4	20993.6	25558.8	28647	30424.5	32070.5	33571	34902.4
38	'RU-NW'	Russia (North-West)	13688.9	13688.9	13688.9	13688.9	13635.6	13474	13230.4	12946.3	12680.8	12461	12271.2
39	'RU-C'	Russia (Center)	38608.3	38608.3	38608.3	38608.3	38457.8	38002.2	37315.1	36513.7	35764.9	35144.9	34609.6
40	'RU-S'	Russia (South)	23414	23414	23414	23414	23322.7	23046.4	22629.7	22143.7	21689.6	21313.6	20989
41	'RU-V'	Russia (Volga region)	29791.9	29791.9	29791.9	29791.9	29675.8	29324.2	28794	28175.6	27597.8	27119.3	26706.3
42	'RU-U'	Russia (Urals)	12170.5	12170.5	12170.5	12170.5	12123.1	11979.4	11762.9	11510.2	11274.2	11078.7	10910
43	'RU-SI'	Russia (Siberia)	19269.6	19269.6	19269.6	19269.6	19194.5	18967.1	18624.2	18224.1	17850.5	17541	17273.8
44	'RU-FE'	Russia (Far East)	6258.67	6258.67	6258.67	6258.67	6234.28	6160.42	6049.04	5919.12	5797.74	5697.23	5610.45
45	'BY'	Belarus	9496	9496	9496	9496	9365	9194	8977	8740	8513	8311	8125
46	'CAU'	Armenia, Azerbaijan, Georgia	12772	12772	12772	12772	13279	13576	13720	13800	13840	13810	13692
47	'KZ'	Kazakhstan	17625	17625	17625	17625	18616	19420	20072	20665	21265	21875	22447
48	'PAM'	Tadjicistan, Kyrgizstan	14422	14422	14422	14422	15803	17066	18199	19286	20398	21509	22536
49	'UZ'	Uzbecistan	29893	29893	29893	29893	31767	33254	34397	35349	36168	36792	37126
50	'TM'	Turkmenistan	5374	5374	5374	5374	5685	5952	6160	6316	6432	6513	6555
51	'JP-E'	Japan East	63701.6	63701.6	63701.6	63701.6	62929.6	61822.9	60457.5	58915.4	57267.2	55623	54057.8
52	'JP-W'	Japan West	62871.4	62871.4	62871.4	62871.4	62109.4	61017.1	59669.5	58147.6	56520.8	54898	53353.2
53	'KR'	South Korea	50293	50293	50293	50293	51251	51982	52519	52715	52398	51649	50593
54	'KP'	North Korea	25155	25155	25155	25155	25763	26292	26701	26943	27030	27007	26907
55	'CN-NE'	China (North-East)	112491	112491	112491	112491	114682	115665	115720	115129	114017	112378	110203
56	'CN-N'	China (North)	267685	267685	267685	267685	272898	275237	275368	273962	271316	267414	262240
57	'CN-E'	China (East)	259349	259349	259349	259349	264400	266666	266793	265431	262867	259087	254073
58	'CN-C'	China (Central)	380834	380834	380834	380834	388250	391578	391764	389764	386000	380448	373086
59	'CN-S'	China (South)	253469	253469	253469	253469	258405	260620	260744	259412	256907	253212	248312
60	'CN-TB'	China (Tibet)	76732.5	76732.5	76732.5	76732.5	78226.9	78897.4	78934.9	78531.8	77773.4	76654.9	75171.6
61	'CN-NW'	China (North-West)	3083.59	3083.59	3083.59	3083.59	3143.65	3170.59	3172.1	3155.9	3125.42	3080.48	3020.86
62	'CN-XU'	China (Uigur region)	22405	22405	22405	22405	22841.3	23037.1	23048.1	22930.4	22708.9	22382.3	21949.2
63	'MN'	Mongolia	2959	2959	2959	2959	3179	3364	3519	3657	3785	3909	4028
[truncated: 84 more rows]

[truncated: 2 more sheets: Population, GDP Per Capita Toktarova]
